# Supplementary material for: CpG Island Methylator Phenotype Modulates the Immune Response of the Tumor Microenvironment and Influences the Prognosis of Pancreatic Cancer Patients
Source: Hindawi journal article supplement (doi:10.1155/2021/2715694), 2021-11-28
Supplement: f1 [file 2715694.f1.zip]

**Overall survival-related CpGs in 184 pancreatic cancer patients identified by univariate Cox analysis**

| CpG        | HR       | HR.95L   | HR.95H   | pvalue   |
|------------|----------|----------|----------|----------|
| cg05026393 | 164.3354 | 3.331608 | 8106.033 | 0.010317 |
| cg13512069 | 62.65259 | 8.162247 | 480.9149 | 6.92E-05 |
| cg20132590 | 55.40887 | 9.918279 | 309.5439 | 4.79E-06 |
| cg05812269 | 45.81789 | 4.210697 | 498.5586 | 0.001687 |
| cg14290616 | 37.04429 | 3.475027 | 394.8975 | 0.002775 |
| cg16701059 | 34.72601 | 5.433231 | 221.9482 | 0.000178 |
| cg08039116 | 29.14275 | 4.951655 | 171.5184 | 0.000192 |
| cg08061040 | 28.60071 | 2.575058 | 317.6631 | 0.006334 |
| cg20218460 | 27.8     | 1.832204 | 421.8088 | 0.016559 |
| cg17683908 | 26.33651 | 1.331196 | 521.0439 | 0.031729 |
| cg09017434 | 24.40644 | 4.208447 | 141.5425 | 0.000368 |
| cg13188098 | 23.17646 | 3.463103 | 155.106  | 0.001192 |
| cg07609862 | 23.13177 | 3.698055 | 144.6919 | 0.000785 |
| cg16399049 | 21.43512 | 4.401576 | 104.3863 | 0.000148 |
| cg07867924 | 21.13815 | 1.54847  | 288.5568 | 0.022146 |
| cg07143083 | 20.41666 | 3.747701 | 111.2256 | 0.000488 |
| cg20019985 | 19.81928 | 3.763366 | 104.3757 | 0.000426 |
| cg20779964 | 19.42531 | 3.843747 | 98.17058 | 0.000332 |
| cg05903444 | 19.00844 | 3.842795 | 94.02547 | 0.000306 |
| cg00498024 | 17.62235 | 2.166653 | 143.3303 | 0.007297 |
| cg22374057 | 17.52056 | 2.881188 | 106.5429 | 0.001878 |
| cg13371839 | 17.26727 | 2.396839 | 124.3966 | 0.00469  |
| cg14661886 | 16.97419 | 1.47254  | 195.664  | 0.023194 |
| cg12431879 | 16.93039 | 3.37296  | 84.98114 | 0.000588 |
| cg23572163 | 16.31347 | 1.673065 | 159.0669 | 0.016266 |
| cg12180703 | 16.0849  | 2.716004 | 95.25907 | 0.002206 |
| cg14754787 | 15.98741 | 3.47206  | 73.6155  | 0.000374 |
| cg23479922 | 15.91963 | 3.4648   | 73.14549 | 0.000375 |
| cg03140968 | 15.86603 | 3.834097 | 65.65584 | 0.000136 |
| cg04222358 | 15.76529 | 3.033946 | 81.9212  | 0.001038 |
| cg20667845 | 15.61761 | 1.631751 | 149.4772 | 0.017086 |
| cg22627826 | 15.60231 | 1.071755 | 227.1341 | 0.044359 |
| cg10659886 | 15.17274 | 2.698686 | 85.30526 | 0.002023 |
| cg11473001 | 15.11224 | 2.815381 | 81.11863 | 0.001539 |
| cg06854015 | 14.9935  | 1.231785 | 182.5036 | 0.033716 |
| cg08858649 | 14.94305 | 3.099793 | 72.03536 | 0.000753 |
| cg09907509 | 14.81361 | 2.872765 | 76.38745 | 0.001278 |
| cg24720580 | 14.76104 | 1.387255 | 157.0645 | 0.025663 |
| cg09124223 | 14.71519 | 3.137651 | 69.01238 | 0.000649 |
| cg15549927 | 14.56896 | 3.205985 | 66.20571 | 0.000524 |
| cg22392666 | 14.56171 | 4.577742 | 46.32049 | 5.72E-06 |
| cg06383163 | 14.17756 | 3.066938 | 65.53875 | 0.000687 |
| cg09469566 | 13.61536 | 2.625878 | 70.59658 | 0.001873 |
| cg20049415 | 13.20286 | 3.073189 | 56.72135 | 0.000521 |
| cg06659727 | 13.00331 | 2.698416 | 62.66125 | 0.001388 |
| cg25415246 | 12.91111 | 3.07673  | 54.17985 | 0.000473 |
| cg11936688 | 12.91069 | 2.410094 | 69.16155 | 0.002815 |
| cg19054524 | 12.70046 | 4.018014 | 40.14461 | 1.50E-05 |
| cg21694941 | 12.58618 | 2.314592 | 68.44052 | 0.003375 |
| cg18940047 | 12.50794 | 3.236711 | 48.33563 | 0.000249 |
| cg02623400 | 12.37871 | 2.51921  | 60.82558 | 0.001952 |
| cg20289346 | 12.34167 | 1.607346 | 94.76294 | 0.01568  |

|            |          |          |          |          |
|------------|----------|----------|----------|----------|
| cg06360427 | 12.32398 | 3.241276 | 46.85825 | 0.000228 |
| cg01100175 | 12.30344 | 2.779854 | 54.45416 | 0.000943 |
| cg00924143 | 12.28278 | 1.609105 | 93.75812 | 0.015578 |
| cg25307168 | 12.2585  | 2.466609 | 60.92204 | 0.002187 |
| cg06906472 | 12.19953 | 3.256491 | 45.70214 | 0.000206 |
| cg00872726 | 12.14166 | 2.60248  | 56.64591 | 0.001487 |
| cg07531228 | 12.06477 | 1.836402 | 79.26294 | 0.00952  |
| cg13338350 | 12.04521 | 1.537883 | 94.34209 | 0.017797 |
| cg26249873 | 11.84105 | 2.98682  | 46.94308 | 0.000436 |
| cg19161124 | 11.71943 | 2.622124 | 52.37934 | 0.001274 |
| cg01371799 | 11.5903  | 2.717466 | 49.43396 | 0.00093  |
| cg11325267 | 11.58274 | 2.325809 | 57.68306 | 0.002786 |
| cg20260127 | 11.36614 | 2.516443 | 51.33803 | 0.00158  |
| cg02842227 | 11.135   | 2.330716 | 53.1975  | 0.002524 |
| cg19107469 | 11.11184 | 2.415369 | 51.11968 | 0.001985 |
| cg16956426 | 11.10066 | 2.653977 | 46.43021 | 0.000978 |
| cg25090514 | 11.05143 | 2.387874 | 51.14762 | 0.002116 |
| cg06304097 | 10.99895 | 3.379942 | 35.79258 | 6.81E-05 |
| cg04317399 | 10.84121 | 2.978205 | 39.46402 | 0.0003   |
| cg04764012 | 10.73596 | 2.147038 | 53.6836  | 0.003847 |
| cg10132208 | 10.62216 | 1.79984  | 62.6891  | 0.009086 |
| cg06462347 | 10.45683 | 3.414797 | 32.021   | 3.94E-05 |
| cg24054190 | 10.45175 | 2.944262 | 37.10237 | 0.000283 |
| cg25397945 | 10.31078 | 2.403969 | 44.22362 | 0.001686 |
| cg02547394 | 10.30984 | 2.329762 | 45.62386 | 0.002109 |
| cg09936426 | 10.3054  | 2.589782 | 41.00784 | 0.000932 |
| cg20557104 | 10.29152 | 1.652136 | 64.10821 | 0.012493 |
| cg14096889 | 10.28472 | 2.463967 | 42.92889 | 0.001389 |
| cg04900080 | 10.2771  | 2.510868 | 42.06463 | 0.001194 |
| cg05502701 | 10.2737  | 2.711777 | 38.92242 | 0.000608 |
| cg17495912 | 10.17919 | 2.515813 | 41.18588 | 0.001139 |
| cg01150683 | 10.16976 | 2.12853  | 48.58944 | 0.003653 |
| cg08204280 | 10.15946 | 2.854973 | 36.15255 | 0.000344 |
| cg03730428 | 10.15479 | 2.560167 | 40.27857 | 0.000977 |
| cg06469345 | 10.13883 | 2.274921 | 45.18658 | 0.002382 |
| cg00297721 | 10.12488 | 1.9127   | 53.59607 | 0.006475 |
| cg01454487 | 10.12463 | 2.215642 | 46.26568 | 0.002825 |
| cg15754548 | 10.07993 | 2.177718 | 46.65665 | 0.003122 |
| cg07382920 | 9.943472 | 2.793684 | 35.39149 | 0.000391 |
| cg07502439 | 9.899923 | 2.194512 | 44.66073 | 0.002859 |
| cg03012170 | 9.895563 | 2.066002 | 47.39693 | 0.004133 |
| cg03840594 | 9.868868 | 1.844493 | 52.80289 | 0.007464 |
| cg17322443 | 9.857262 | 2.133303 | 45.54702 | 0.003387 |
| cg21609339 | 9.811775 | 2.4058   | 40.01617 | 0.001453 |
| cg22762091 | 9.765841 | 2.106403 | 45.27701 | 0.003593 |
| cg16123202 | 9.746279 | 2.725347 | 34.85426 | 0.000462 |
| cg24740218 | 9.689054 | 1.984748 | 47.29958 | 0.004995 |
| cg25403721 | 9.663907 | 2.547045 | 36.66645 | 0.000856 |
| cg10443187 | 9.646807 | 1.651886 | 56.33616 | 0.011822 |
| cg00397673 | 9.641701 | 2.168169 | 42.87599 | 0.002916 |
| cg23668184 | 9.610612 | 2.640532 | 34.97926 | 0.000597 |
| cg02485566 | 9.59426  | 1.741524 | 52.85591 | 0.0094   |
| cg23016129 | 9.589959 | 2.100753 | 43.77826 | 0.003522 |
| cg19922137 | 9.572453 | 2.295376 | 39.9202  | 0.001933 |

|            |          |          |          |          |
|------------|----------|----------|----------|----------|
| cg05337743 | 9.542493 | 2.013035 | 45.23477 | 0.004495 |
| cg17391928 | 9.515969 | 2.495765 | 36.28292 | 0.000969 |
| cg04510788 | 9.505973 | 2.271471 | 39.78193 | 0.002047 |
| cg04339613 | 9.499117 | 1.948187 | 46.31652 | 0.005353 |
| cg15989068 | 9.446021 | 1.940477 | 45.98214 | 0.00542  |
| cg02039267 | 9.39332  | 2.237838 | 39.42843 | 0.002209 |
| cg16732616 | 9.391446 | 2.602531 | 33.8898  | 0.000624 |
| cg26351229 | 9.303509 | 1.837274 | 47.1107  | 0.00704  |
| cg25562664 | 9.251193 | 1.922814 | 44.51007 | 0.005509 |
| cg03574723 | 9.242032 | 2.010109 | 42.4928  | 0.004277 |
| cg10158541 | 9.238533 | 2.20145  | 38.77013 | 0.002379 |
| cg00811065 | 9.210719 | 2.643643 | 32.09108 | 0.000489 |
| cg17555373 | 9.156444 | 1.745507 | 48.03216 | 0.008827 |
| cg26894523 | 9.147476 | 1.857632 | 45.04461 | 0.006501 |
| cg00945234 | 9.126364 | 2.438983 | 34.14969 | 0.001023 |
| cg04711162 | 9.074028 | 2.152454 | 38.25308 | 0.002662 |
| cg25916711 | 9.063135 | 2.123557 | 38.68058 | 0.00291  |
| cg10721834 | 9.052266 | 2.416061 | 33.91617 | 0.00108  |
| cg05353133 | 9.015279 | 1.644836 | 49.41237 | 0.0113   |
| cg12699371 | 8.992239 | 2.475695 | 32.66168 | 0.000845 |
| cg14714046 | 8.958078 | 2.021713 | 39.69267 | 0.003892 |
| cg18247055 | 8.946127 | 2.104771 | 38.02466 | 0.002998 |
| cg26452056 | 8.939692 | 2.274671 | 35.1339  | 0.001708 |
| cg01003961 | 8.924792 | 1.6042   | 49.65211 | 0.012429 |
| cg06511917 | 8.923299 | 1.522526 | 52.29813 | 0.01527  |
| cg09471659 | 8.894789 | 1.419463 | 55.73744 | 0.019593 |
| cg22620221 | 8.831105 | 2.444564 | 31.9028  | 0.000887 |
| cg09685182 | 8.816853 | 2.062584 | 37.68908 | 0.003317 |
| cg02187214 | 8.78501  | 1.974167 | 39.09315 | 0.004332 |
| cg22131234 | 8.759318 | 2.45749  | 31.22115 | 0.000818 |
| cg04077662 | 8.730641 | 2.256393 | 33.7814  | 0.001697 |
| cg24398479 | 8.729826 | 2.710728 | 28.11417 | 0.000282 |
| cg05184456 | 8.709857 | 2.281989 | 33.24364 | 0.001539 |
| cg20449685 | 8.702066 | 2.129844 | 35.55469 | 0.002589 |
| cg12460133 | 8.685485 | 2.417959 | 31.1989  | 0.000922 |
| cg21300373 | 8.680302 | 2.057079 | 36.62847 | 0.003263 |
| cg13688769 | 8.647529 | 2.08299  | 35.90021 | 0.002975 |
| cg14353137 | 8.642516 | 2.673168 | 27.94178 | 0.000315 |
| cg07682600 | 8.608055 | 2.375423 | 31.19386 | 0.001049 |
| cg18217632 | 8.574782 | 2.237221 | 32.86528 | 0.001721 |
| cg26931862 | 8.566532 | 1.883493 | 38.96243 | 0.005449 |
| cg17713613 | 8.556322 | 2.276223 | 32.16322 | 0.001486 |
| cg06000994 | 8.554329 | 1.846631 | 39.62705 | 0.006067 |
| cg11344566 | 8.544372 | 2.27773  | 32.05221 | 0.001471 |
| cg05076914 | 8.537907 | 2.3314   | 31.26699 | 0.001203 |
| cg22638505 | 8.531575 | 2.143559 | 33.9565  | 0.002351 |
| cg25756635 | 8.519157 | 2.208998 | 32.85474 | 0.001866 |
| cg22752533 | 8.447472 | 1.879766 | 37.96206 | 0.005383 |
| cg25701114 | 8.441352 | 2.228434 | 31.97601 | 0.001694 |
| cg08795964 | 8.42968  | 2.216526 | 32.05895 | 0.001761 |
| cg27376182 | 8.407778 | 2.73524  | 25.84443 | 0.000202 |
| cg20332645 | 8.38072  | 1.975165 | 35.55979 | 0.003939 |
| cg19081437 | 8.37877  | 2.209684 | 31.77097 | 0.001773 |
| cg02101203 | 8.364843 | 1.699479 | 41.1718  | 0.008997 |

|            |          |          |          |          |
|------------|----------|----------|----------|----------|
| cg03817667 | 8.311164 | 2.977488 | 23.19923 | 5.27E-05 |
| cg13944175 | 8.306246 | 2.293623 | 30.08068 | 0.001263 |
| cg08279008 | 8.29061  | 2.933331 | 23.43214 | 6.61E-05 |
| cg11293190 | 8.288094 | 1.584378 | 43.35614 | 0.012242 |
| cg03593833 | 8.285417 | 1.440907 | 47.64231 | 0.017825 |
| cg06719900 | 8.282579 | 2.031111 | 33.77517 | 0.003198 |
| cg03544320 | 8.279706 | 2.047073 | 33.48856 | 0.003029 |
| cg04018622 | 8.258248 | 2.390498 | 28.52906 | 0.000844 |
| cg24563570 | 8.240195 | 1.825662 | 37.19244 | 0.006092 |
| cg22203219 | 8.220588 | 2.144265 | 31.51572 | 0.002123 |
| cg15683295 | 8.214596 | 1.981114 | 34.06143 | 0.003707 |
| cg17861230 | 8.199871 | 2.491865 | 26.98296 | 0.000535 |
| cg05945059 | 8.193576 | 2.280679 | 29.43627 | 0.001266 |
| cg23989963 | 8.159832 | 2.108104 | 31.58423 | 0.002366 |
| cg27595860 | 8.139619 | 2.082611 | 31.81267 | 0.002571 |
| cg15490703 | 8.125477 | 1.679583 | 39.30939 | 0.009197 |
| cg26822097 | 8.121243 | 1.92518  | 34.25892 | 0.004347 |
| cg12355110 | 8.096817 | 1.834677 | 35.73297 | 0.00576  |
| cg09874822 | 8.083738 | 2.44908  | 26.6822  | 0.000603 |
| cg10647513 | 8.082644 | 1.817735 | 35.93986 | 0.006053 |
| cg02318926 | 8.076371 | 2.205374 | 29.57673 | 0.00161  |
| cg07552803 | 8.055084 | 1.86337  | 34.82099 | 0.005218 |
| cg20300343 | 8.044589 | 2.126598 | 30.43143 | 0.00213  |
| cg00413617 | 8.040267 | 1.851527 | 34.91491 | 0.0054   |
| cg18724565 | 8.026494 | 1.342478 | 47.98931 | 0.022444 |
| cg14810013 | 8.020703 | 1.656091 | 38.84549 | 0.00969  |
| cg14473102 | 8.000705 | 2.1398   | 29.91461 | 0.001998 |
| cg19741167 | 7.992727 | 2.642107 | 24.17907 | 0.000233 |
| cg08313939 | 7.986607 | 2.214722 | 28.80086 | 0.001498 |
| cg20930366 | 7.978396 | 1.734021 | 36.70936 | 0.007658 |
| cg04415176 | 7.970297 | 1.960563 | 32.40172 | 0.003722 |
| cg18764577 | 7.968925 | 2.280588 | 27.84535 | 0.001148 |
| cg10722226 | 7.956372 | 2.07414  | 30.52053 | 0.002498 |
| cg23839136 | 7.942481 | 2.0254   | 31.14595 | 0.002956 |
| cg05477514 | 7.921811 | 1.785789 | 35.14138 | 0.006472 |
| cg24136205 | 7.920746 | 1.481571 | 42.34574 | 0.015539 |
| cg19754554 | 7.893138 | 2.070717 | 30.08699 | 0.002477 |
| cg11390378 | 7.883891 | 2.164719 | 28.71308 | 0.001742 |
| cg08448701 | 7.876971 | 2.433465 | 25.49725 | 0.000573 |
| cg13304274 | 7.874899 | 2.004892 | 30.93135 | 0.003112 |
| cg26013553 | 7.860955 | 2.326093 | 26.56584 | 0.000904 |
| cg03972398 | 7.849328 | 1.827131 | 33.7206  | 0.005599 |
| cg14720763 | 7.849112 | 1.871577 | 32.91799 | 0.004849 |
| cg14359292 | 7.843411 | 2.493291 | 24.67385 | 0.000428 |
| cg05900347 | 7.831145 | 1.379801 | 44.44613 | 0.020158 |
| cg05992357 | 7.819024 | 1.66975  | 36.61455 | 0.009033 |
| cg13794993 | 7.811256 | 1.536989 | 39.69821 | 0.013206 |
| cg13822303 | 7.806473 | 1.856876 | 32.81911 | 0.005037 |
| cg03109827 | 7.804735 | 2.360562 | 25.80482 | 0.000758 |
| cg20803857 | 7.793998 | 2.702639 | 22.4767  | 0.000145 |
| cg08005774 | 7.789168 | 2.039965 | 29.74126 | 0.002674 |
| cg17078686 | 7.788904 | 2.2389   | 27.0968  | 0.001251 |
| cg05678749 | 7.774971 | 1.914274 | 31.57865 | 0.004131 |
| cg19258062 | 7.753609 | 1.947964 | 30.86219 | 0.00366  |

|            |          |          |          |          |
|------------|----------|----------|----------|----------|
| cg27062795 | 7.740554 | 1.966443 | 30.46933 | 0.00342  |
| cg23035602 | 7.726607 | 1.646571 | 36.25744 | 0.009536 |
| cg05965288 | 7.725404 | 2.030597 | 29.3913  | 0.002709 |
| cg12756396 | 7.724683 | 1.75768  | 33.94857 | 0.006797 |
| cg15475851 | 7.721551 | 1.647672 | 36.18581 | 0.009498 |
| cg19672997 | 7.709165 | 2.097582 | 28.33321 | 0.002102 |
| cg14658067 | 7.705576 | 2.272873 | 26.12373 | 0.001045 |
| cg05433039 | 7.691018 | 1.463046 | 40.43056 | 0.01598  |
| cg13796823 | 7.685307 | 2.186229 | 27.01636 | 0.001476 |
| cg02332525 | 7.68241  | 1.693002 | 34.86082 | 0.008235 |
| cg19267861 | 7.661827 | 2.114819 | 27.75821 | 0.001933 |
| cg13324546 | 7.65452  | 1.965681 | 29.80731 | 0.003343 |
| cg26813646 | 7.597171 | 1.711579 | 33.72149 | 0.00766  |
| cg03671597 | 7.58686  | 2.407553 | 23.90828 | 0.00054  |
| cg02885007 | 7.586245 | 1.600898 | 35.94925 | 0.010687 |
| cg15874092 | 7.562647 | 1.942231 | 29.44739 | 0.003533 |
| cg07268058 | 7.559863 | 2.100589 | 27.20738 | 0.001962 |
| cg22562942 | 7.549597 | 1.745907 | 32.64574 | 0.006812 |
| cg07317062 | 7.512354 | 2.359379 | 23.91962 | 0.000643 |
| cg12560987 | 7.510809 | 2.094169 | 26.93777 | 0.001973 |
| cg07549278 | 7.500403 | 2.21133  | 25.43991 | 0.001223 |
| cg12520549 | 7.492728 | 1.522957 | 36.86313 | 0.013233 |
| cg04971534 | 7.465959 | 2.353523 | 23.68388 | 0.000642 |
| cg19707040 | 7.463987 | 1.857462 | 29.99313 | 0.004618 |
| cg25818402 | 7.453727 | 1.206149 | 46.06233 | 0.030644 |
| cg16913789 | 7.447492 | 1.979345 | 28.02196 | 0.00298  |
| cg12380743 | 7.440799 | 2.430886 | 22.77585 | 0.000438 |
| cg20448053 | 7.436323 | 1.386633 | 39.88    | 0.01921  |
| cg22989103 | 7.421068 | 2.078889 | 26.49119 | 0.002021 |
| cg04745161 | 7.419085 | 1.609546 | 34.19773 | 0.010157 |
| cg12212311 | 7.403288 | 2.558481 | 21.42235 | 0.000222 |
| cg15491461 | 7.379616 | 1.647359 | 33.05821 | 0.008991 |
| cg00939495 | 7.3557   | 2.190286 | 24.70286 | 0.001245 |
| cg05376374 | 7.353642 | 2.299754 | 23.51384 | 0.000768 |
| cg19717586 | 7.349344 | 2.420708 | 22.31284 | 0.000431 |
| cg02222728 | 7.346407 | 1.507699 | 35.79607 | 0.013582 |
| cg10298052 | 7.34359  | 2.375297 | 22.70382 | 0.000536 |
| cg12668482 | 7.336339 | 2.100313 | 25.62565 | 0.001791 |
| cg10384919 | 7.333191 | 1.810945 | 29.69482 | 0.005235 |
| cg19786627 | 7.322349 | 1.792593 | 29.91019 | 0.005557 |
| cg08235864 | 7.321722 | 2.418919 | 22.16181 | 0.000426 |
| cg15060599 | 7.318022 | 2.213427 | 24.19481 | 0.001105 |
| cg09155219 | 7.293331 | 1.38606  | 38.3769  | 0.019011 |
| cg08159291 | 7.285428 | 1.899977 | 27.93585 | 0.00378  |
| cg10420161 | 7.285283 | 1.548411 | 34.2773  | 0.01196  |
| cg10836101 | 7.246827 | 1.663422 | 31.57137 | 0.008348 |
| cg08013557 | 7.245466 | 1.983502 | 26.46671 | 0.002735 |
| cg18206027 | 7.245107 | 2.178065 | 24.1001  | 0.001241 |
| cg20635409 | 7.232056 | 1.775011 | 29.46609 | 0.00577  |
| cg07103493 | 7.229379 | 1.967085 | 26.56923 | 0.002895 |
| cg05151395 | 7.224457 | 1.285593 | 40.59822 | 0.024756 |
| cg25024074 | 7.223443 | 2.205141 | 23.66204 | 0.00109  |
| cg16880856 | 7.222272 | 1.046018 | 49.86644 | 0.044899 |
| cg11651237 | 7.213338 | 2.000458 | 26.01016 | 0.002531 |

|            |          |          |          |          |
|------------|----------|----------|----------|----------|
| cg12527175 | 7.209505 | 1.619721 | 32.09006 | 0.009515 |
| cg00182639 | 7.206044 | 1.103412 | 47.06044 | 0.039137 |
| cg10997479 | 7.17081  | 1.610397 | 31.93032 | 0.009731 |
| cg05143633 | 7.163093 | 1.831407 | 28.01666 | 0.004662 |
| cg24721899 | 7.14139  | 1.767007 | 28.86205 | 0.0058   |
| cg14015441 | 7.138289 | 1.77729  | 28.67016 | 0.005595 |
| cg15916399 | 7.126185 | 2.266334 | 22.40735 | 0.00078  |
| cg16762735 | 7.12517  | 1.466279 | 34.62373 | 0.014914 |
| cg23217126 | 7.124758 | 2.082989 | 24.36988 | 0.001751 |
| cg17007640 | 7.122075 | 1.83215  | 27.68548 | 0.004596 |
| cg08305436 | 7.111586 | 1.765209 | 28.65081 | 0.005793 |
| cg18343437 | 7.09329  | 1.928521 | 26.08982 | 0.003195 |
| cg03712816 | 7.08506  | 1.885164 | 26.62797 | 0.003749 |
| cg25486757 | 7.081428 | 2.03639  | 24.62525 | 0.002081 |
| cg11708136 | 7.079917 | 1.49865  | 33.44693 | 0.013487 |
| cg07244354 | 7.077819 | 1.510064 | 33.17445 | 0.013033 |
| cg03570636 | 7.069585 | 1.857054 | 26.91307 | 0.004137 |
| cg00816224 | 7.058795 | 1.68509  | 29.5691  | 0.007496 |
| cg07203423 | 7.050264 | 1.717074 | 28.94821 | 0.006725 |
| cg12591770 | 7.040325 | 1.734652 | 28.57413 | 0.006322 |
| cg21573200 | 7.03033  | 2.026054 | 24.39498 | 0.002124 |
| cg02657836 | 7.005865 | 1.633105 | 30.05449 | 0.00879  |
| cg00333226 | 6.995383 | 2.044097 | 23.93985 | 0.001942 |
| cg05697849 | 6.995377 | 2.221552 | 22.02753 | 0.000888 |
| cg08141424 | 6.987305 | 2.019551 | 24.17489 | 0.002142 |
| cg14530304 | 6.982243 | 1.734846 | 28.10146 | 0.00623  |
| cg18023096 | 6.981107 | 1.665303 | 29.26546 | 0.007874 |
| cg02578368 | 6.976461 | 2.639595 | 18.43882 | 8.95E-05 |
| cg15032142 | 6.968835 | 1.64315  | 29.55583 | 0.008448 |
| cg20585869 | 6.946644 | 1.648236 | 29.27727 | 0.008271 |
| cg09451215 | 6.94302  | 1.451763 | 33.20482 | 0.015231 |
| cg12595013 | 6.937402 | 1.723479 | 27.92464 | 0.006409 |
| cg16418810 | 6.911356 | 2.326456 | 20.53202 | 0.000502 |
| cg06636427 | 6.910598 | 1.801249 | 26.51293 | 0.004836 |
| cg03881775 | 6.906787 | 1.851486 | 25.76509 | 0.004015 |
| cg19677607 | 6.904361 | 1.717029 | 27.76319 | 0.006501 |
| cg11410718 | 6.87621  | 2.109045 | 22.41881 | 0.001386 |
| cg05937737 | 6.842823 | 2.011544 | 23.27775 | 0.002078 |
| cg14209299 | 6.836098 | 1.988671 | 23.49923 | 0.002279 |
| cg10056132 | 6.833863 | 1.949569 | 23.95488 | 0.002672 |
| cg20146541 | 6.828546 | 1.75674  | 26.54293 | 0.005547 |
| cg18556676 | 6.827136 | 1.99829  | 23.32483 | 0.002181 |
| cg00127167 | 6.82622  | 1.788545 | 26.05318 | 0.004942 |
| cg15431544 | 6.82194  | 1.694615 | 27.46279 | 0.006887 |
| cg16651126 | 6.8216   | 1.511457 | 30.78765 | 0.012518 |
| cg05756220 | 6.810231 | 1.744386 | 26.58772 | 0.005769 |
| cg14384532 | 6.810147 | 1.843232 | 25.1613  | 0.004014 |
| cg24089600 | 6.792563 | 2.020105 | 22.83986 | 0.001959 |
| cg13891978 | 6.785197 | 2.005986 | 22.95076 | 0.002073 |
| cg25684999 | 6.776437 | 1.680781 | 27.32069 | 0.007146 |
| cg16764637 | 6.766969 | 1.750403 | 26.16076 | 0.005581 |
| cg23929344 | 6.760715 | 2.141238 | 21.34618 | 0.001122 |
| cg23883696 | 6.758934 | 1.965769 | 23.23935 | 0.002424 |
| cg12483476 | 6.747952 | 1.964514 | 23.17868 | 0.002426 |

|            |          |          |          |          |
|------------|----------|----------|----------|----------|
| cg25136495 | 6.74742  | 2.356457 | 19.32039 | 0.000375 |
| cg02509825 | 6.739433 | 1.393413 | 32.59619 | 0.017669 |
| cg11530960 | 6.7384   | 1.538945 | 29.50465 | 0.011337 |
| cg05313771 | 6.730896 | 1.701784 | 26.62204 | 0.006571 |
| cg20405017 | 6.717252 | 1.682321 | 26.82097 | 0.007011 |
| cg17070988 | 6.703126 | 1.630755 | 27.55282 | 0.008338 |
| cg14492800 | 6.692857 | 2.148679 | 20.84738 | 0.00104  |
| cg21077559 | 6.682001 | 1.94973  | 22.90017 | 0.002508 |
| cg16494192 | 6.681429 | 1.62882  | 27.40726 | 0.008355 |
| cg03609960 | 6.671302 | 2.067045 | 21.53135 | 0.0015   |
| cg17078116 | 6.666058 | 1.841967 | 24.12439 | 0.003843 |
| cg22476848 | 6.661378 | 1.411067 | 31.44708 | 0.016628 |
| cg00986824 | 6.656285 | 1.776708 | 24.9372  | 0.00491  |
| cg26521404 | 6.655506 | 1.92451  | 23.01664 | 0.002753 |
| cg00070680 | 6.655177 | 1.998562 | 22.16162 | 0.002014 |
| cg16619425 | 6.654398 | 1.975727 | 22.41252 | 0.002221 |
| cg04324666 | 6.638194 | 1.580551 | 27.8799  | 0.009733 |
| cg27434509 | 6.636164 | 1.856533 | 23.72092 | 0.003592 |
| cg18044383 | 6.631771 | 1.70549  | 25.78754 | 0.006325 |
| cg20270188 | 6.63036  | 1.600291 | 27.47105 | 0.0091   |
| cg07960450 | 6.602834 | 1.881776 | 23.16823 | 0.003208 |
| cg09371439 | 6.598252 | 1.119159 | 38.90148 | 0.03713  |
| cg25901381 | 6.597014 | 1.822061 | 23.88537 | 0.004054 |
| cg19828791 | 6.577902 | 1.251277 | 34.57972 | 0.026101 |
| cg03209854 | 6.567192 | 1.77468  | 24.30186 | 0.004814 |
| cg10739556 | 6.558235 | 2.408502 | 17.85776 | 0.000233 |
| cg00688962 | 6.554938 | 1.457077 | 29.48863 | 0.014262 |
| cg15191648 | 6.543098 | 1.668246 | 25.66296 | 0.007062 |
| cg01283246 | 6.542491 | 2.116533 | 20.22373 | 0.001106 |
| cg07015911 | 6.540873 | 1.909338 | 22.40725 | 0.002795 |
| cg03532926 | 6.536444 | 2.174533 | 19.64794 | 0.000828 |
| cg01856162 | 6.533433 | 1.949306 | 21.89792 | 0.002353 |
| cg24000873 | 6.531052 | 1.972972 | 21.61948 | 0.002122 |
| cg22491141 | 6.528825 | 1.414714 | 30.13017 | 0.016191 |
| cg18952796 | 6.524249 | 2.172366 | 19.59422 | 0.00083  |
| cg11148130 | 6.520119 | 2.057417 | 20.66278 | 0.001443 |
| cg06724588 | 6.504344 | 1.786363 | 23.68304 | 0.004513 |
| cg08146323 | 6.502171 | 1.556448 | 27.16328 | 0.010275 |
| cg01305913 | 6.489782 | 1.511317 | 27.86791 | 0.011889 |
| cg25602684 | 6.487701 | 1.97491  | 21.3125  | 0.00206  |
| cg24129390 | 6.486106 | 2.056591 | 20.45597 | 0.001421 |
| cg25903072 | 6.485031 | 1.034122 | 40.66797 | 0.045958 |
| cg26492368 | 6.480499 | 1.96289  | 21.39542 | 0.002165 |
| cg05749717 | 6.479488 | 1.759084 | 23.86683 | 0.00497  |
| cg10767141 | 6.477035 | 1.900149 | 22.07826 | 0.002827 |
| cg09549813 | 6.469791 | 2.102124 | 19.91233 | 0.001133 |
| cg20289688 | 6.451706 | 1.84082  | 22.61194 | 0.003573 |
| cg22674699 | 6.442786 | 2.059604 | 20.15412 | 0.001366 |
| cg01429449 | 6.441563 | 1.513044 | 27.42401 | 0.011727 |
| cg13567542 | 6.439078 | 1.740462 | 23.82226 | 0.005268 |
| cg23130131 | 6.437161 | 1.510944 | 27.4246  | 0.011799 |
| cg11097541 | 6.434453 | 1.477459 | 28.02257 | 0.013142 |
| cg21100077 | 6.429663 | 1.800456 | 22.96116 | 0.004165 |
| cg26257822 | 6.42782  | 1.485033 | 27.82219 | 0.012813 |

|            |          |          |          |          |
|------------|----------|----------|----------|----------|
| cg10320659 | 6.418912 | 2.014033 | 20.45767 | 0.001667 |
| cg19594305 | 6.415953 | 1.84332  | 22.33169 | 0.003489 |
| cg22686881 | 6.41477  | 1.880774 | 21.8789  | 0.002987 |
| cg10806639 | 6.413175 | 2.299525 | 17.88579 | 0.000383 |
| cg02249074 | 6.390451 | 1.557725 | 26.21636 | 0.010013 |
| cg13755795 | 6.387228 | 1.884864 | 21.64436 | 0.002902 |
| cg15149095 | 6.359609 | 1.75179  | 23.0876  | 0.00492  |
| cg06786064 | 6.357206 | 1.703855 | 23.71919 | 0.005902 |
| cg26789779 | 6.356079 | 2.043236 | 19.77243 | 0.001403 |
| cg14473924 | 6.353399 | 2.154806 | 18.73285 | 0.000804 |
| cg04613834 | 6.349548 | 1.452167 | 27.76316 | 0.014066 |
| cg01210554 | 6.344458 | 1.923228 | 20.92947 | 0.002414 |
| cg06980387 | 6.334618 | 1.488163 | 26.96438 | 0.012494 |
| cg02919615 | 6.333285 | 1.680148 | 23.8732  | 0.006403 |
| cg04534765 | 6.331932 | 2.096729 | 19.12186 | 0.001064 |
| cg15965134 | 6.331868 | 1.361157 | 29.45477 | 0.018619 |
| cg16317181 | 6.330959 | 1.688091 | 23.74341 | 0.006213 |
| cg18181607 | 6.330613 | 1.553446 | 25.79856 | 0.01004  |
| cg08566455 | 6.32746  | 1.891443 | 21.16731 | 0.00275  |
| cg16939364 | 6.327456 | 1.576992 | 25.38801 | 0.009253 |
| cg19119032 | 6.325596 | 1.54299  | 25.93223 | 0.010393 |
| cg07405021 | 6.315796 | 1.269823 | 31.41325 | 0.024334 |
| cg14994060 | 6.314142 | 1.543283 | 25.83349 | 0.010359 |
| cg14035771 | 6.311226 | 1.90195  | 20.94249 | 0.002608 |
| cg12325536 | 6.301389 | 1.564416 | 25.38169 | 0.009612 |
| cg23254031 | 6.295495 | 1.424001 | 27.83232 | 0.015264 |
| cg16151151 | 6.278115 | 1.42889  | 27.58415 | 0.014993 |
| cg01886514 | 6.275324 | 1.650567 | 23.85828 | 0.00703  |
| cg09086835 | 6.27494  | 1.602106 | 24.57695 | 0.008374 |
| cg00854817 | 6.253999 | 1.646981 | 23.748   | 0.007084 |
| cg27391267 | 6.246579 | 1.341825 | 29.07961 | 0.019561 |
| cg12904880 | 6.244061 | 1.89349  | 20.5907  | 0.002624 |
| cg01956420 | 6.238969 | 1.960469 | 19.8548  | 0.001937 |
| cg14047094 | 6.219609 | 1.495435 | 25.86775 | 0.011959 |
| cg20634442 | 6.219461 | 1.923585 | 20.10916 | 0.002269 |
| cg27416372 | 6.218657 | 1.605927 | 24.0806  | 0.008151 |
| cg19237294 | 6.209857 | 1.747867 | 22.0625  | 0.004754 |
| cg03634479 | 6.189521 | 1.268757 | 30.19505 | 0.024174 |
| cg24880701 | 6.187931 | 1.472242 | 26.00829 | 0.012848 |
| cg24642065 | 6.184048 | 1.836755 | 20.82066 | 0.003265 |
| cg03181248 | 6.181259 | 1.862609 | 20.51314 | 0.002918 |
| cg05050657 | 6.175855 | 2.312897 | 16.49065 | 0.00028  |
| cg24621437 | 6.172459 | 2.01422  | 18.91514 | 0.001445 |
| cg23331421 | 6.171442 | 1.784561 | 21.34233 | 0.004042 |
| cg01577751 | 6.168895 | 1.641326 | 23.18569 | 0.007071 |
| cg24319902 | 6.166925 | 1.625765 | 23.39266 | 0.007486 |
| cg20311863 | 6.166433 | 1.931907 | 19.68257 | 0.002126 |
| cg11750165 | 6.163425 | 1.337868 | 28.39428 | 0.019625 |
| cg15237923 | 6.158319 | 1.672313 | 22.67811 | 0.006275 |
| cg05506365 | 6.141723 | 1.736786 | 21.71871 | 0.004854 |
| cg14005246 | 6.139633 | 1.616568 | 23.31797 | 0.00769  |
| cg04950301 | 6.134635 | 1.375654 | 27.357   | 0.017403 |
| cg01783070 | 6.128319 | 2.131799 | 17.61718 | 0.000766 |
| cg06717850 | 6.126692 | 1.598069 | 23.48857 | 0.008201 |



|            |          |          |          |          |
|------------|----------|----------|----------|----------|
| cg04669574 | 6.119737 | 2.114666 | 17.71021 | 0.000834 |
| cg19595505 | 6.105331 | 1.77128  | 21.04415 | 0.004164 |
| cg25720804 | 6.101261 | 1.898219 | 19.61069 | 0.002399 |
| cg25359908 | 6.099053 | 1.298927 | 28.63783 | 0.02194  |
| cg01281157 | 6.096894 | 1.959853 | 18.96679 | 0.001796 |
| cg01574663 | 6.09185  | 1.331386 | 27.87369 | 0.019867 |
| cg27490380 | 6.061167 | 1.477351 | 24.86731 | 0.012357 |
| cg22333960 | 6.05384  | 1.912465 | 19.16321 | 0.002193 |
| cg00332021 | 6.053201 | 1.069026 | 34.27534 | 0.041809 |
| cg07440398 | 6.048425 | 1.46704  | 24.9369  | 0.012766 |
| cg22125805 | 6.043632 | 1.82386  | 20.02648 | 0.003249 |
| cg13954457 | 6.027235 | 2.134413 | 17.01993 | 0.000695 |
| cg23683254 | 6.026783 | 1.774404 | 20.47004 | 0.003987 |
| cg21231400 | 6.02296  | 1.721186 | 21.0762  | 0.00496  |
| cg10502121 | 6.015885 | 1.241873 | 29.14216 | 0.02581  |
| cg14459130 | 6.012845 | 1.665542 | 21.70724 | 0.006166 |
| cg02730156 | 6.011587 | 1.537666 | 23.50262 | 0.009923 |
| cg16783744 | 6.007449 | 1.449487 | 24.89808 | 0.013448 |
| cg04227922 | 6.003108 | 1.756638 | 20.51493 | 0.004256 |
| cg26014391 | 5.997508 | 1.94453  | 18.49809 | 0.001826 |
| cg15007156 | 5.992728 | 1.632786 | 21.99479 | 0.006955 |
| cg00505045 | 5.99134  | 1.363922 | 26.31834 | 0.01774  |
| cg06410537 | 5.989094 | 1.30041  | 27.58303 | 0.021615 |
| cg07072722 | 5.98108  | 1.497401 | 23.89027 | 0.011362 |
| cg15565065 | 5.980028 | 2.18627  | 16.35696 | 0.000495 |
| cg05336395 | 5.97886  | 1.234011 | 28.96795 | 0.026342 |
| cg03758150 | 5.978322 | 1.847345 | 19.34687 | 0.002843 |
| cg18621091 | 5.977999 | 1.917936 | 18.63278 | 0.002051 |
| cg01366419 | 5.9667   | 1.555898 | 22.88164 | 0.0092   |
| cg10978753 | 5.965378 | 1.707938 | 20.83549 | 0.005129 |
| cg01874697 | 5.964076 | 1.346004 | 26.42652 | 0.018713 |
| cg22095604 | 5.963974 | 2.067772 | 17.2016  | 0.000953 |
| cg13473356 | 5.957617 | 1.682507 | 21.09542 | 0.005667 |
| cg12918457 | 5.956723 | 1.82599  | 19.43196 | 0.003096 |
| cg24328125 | 5.94686  | 1.455814 | 24.29235 | 0.013027 |
| cg06425919 | 5.941675 | 1.58294  | 22.30249 | 0.008278 |
| cg01610605 | 5.936948 | 1.587485 | 22.20327 | 0.008129 |
| cg14098847 | 5.923067 | 1.933681 | 18.14297 | 0.001842 |
| cg02914422 | 5.91565  | 1.948156 | 17.9631  | 0.001708 |
| cg12432010 | 5.892992 | 1.618911 | 21.45106 | 0.007129 |
| cg26055770 | 5.892556 | 1.934587 | 17.94813 | 0.001801 |
| cg09123431 | 5.89162  | 1.33473  | 26.00616 | 0.019227 |
| cg15310492 | 5.878424 | 1.661088 | 20.80315 | 0.006015 |
| cg01866606 | 5.873429 | 1.403787 | 24.57436 | 0.015333 |
| cg20896728 | 5.859968 | 1.061856 | 32.33886 | 0.042475 |
| cg20168230 | 5.856084 | 1.717089 | 19.97201 | 0.004748 |
| cg12610471 | 5.8527   | 1.649741 | 20.76333 | 0.006241 |
| cg22546168 | 5.846625 | 1.625053 | 21.03502 | 0.006867 |
| cg14712186 | 5.846565 | 1.712406 | 19.96158 | 0.004825 |
| cg06550340 | 5.846293 | 1.513721 | 22.57955 | 0.010428 |
| cg06256858 | 5.842607 | 1.567378 | 21.77908 | 0.008554 |
| cg10807260 | 5.842077 | 1.148711 | 29.71145 | 0.033417 |
| cg01486814 | 5.835517 | 1.340406 | 25.40518 | 0.018757 |
| cg24127719 | 5.831624 | 1.876202 | 18.12589 | 0.002308 |

|            |          |          |          |          |
|------------|----------|----------|----------|----------|
| cg03171770 | 5.822307 | 1.757613 | 19.28711 | 0.003941 |
| cg05663573 | 5.814293 | 2.074024 | 16.29972 | 0.000817 |
| cg11739758 | 5.813757 | 1.610266 | 20.99017 | 0.007204 |
| cg04020079 | 5.810838 | 1.764877 | 19.13212 | 0.0038   |
| cg20892990 | 5.80372  | 1.557695 | 21.62373 | 0.008783 |
| cg18752880 | 5.801562 | 1.149648 | 29.27689 | 0.033269 |
| cg19030607 | 5.795138 | 1.109862 | 30.25928 | 0.037199 |
| cg08347047 | 5.791368 | 1.639809 | 20.45357 | 0.006368 |
| cg05581451 | 5.787188 | 1.539495 | 21.75489 | 0.009361 |
| cg16650901 | 5.787177 | 1.639223 | 20.43128 | 0.006374 |
| cg23842255 | 5.779722 | 1.307954 | 25.54003 | 0.020663 |
| cg03169018 | 5.770678 | 1.471335 | 22.633   | 0.011944 |
| cg10127275 | 5.768152 | 1.642808 | 20.25286 | 0.006245 |
| cg14451382 | 5.754591 | 1.424053 | 23.25427 | 0.014045 |
| cg12940822 | 5.753325 | 2.0577   | 16.08629 | 0.000852 |
| cg15871127 | 5.751844 | 1.317525 | 25.11049 | 0.019982 |
| cg13912117 | 5.749628 | 2.143656 | 15.42142 | 0.000511 |
| cg13352750 | 5.746333 | 1.642907 | 20.09873 | 0.006198 |
| cg04670857 | 5.743389 | 1.759049 | 18.75246 | 0.003786 |
| cg11667258 | 5.742837 | 1.596704 | 20.65516 | 0.00744  |
| cg00836482 | 5.738503 | 2.047297 | 16.08483 | 0.000892 |
| cg14691529 | 5.737359 | 1.804745 | 18.2393  | 0.003071 |
| cg24645221 | 5.735837 | 1.267461 | 25.95726 | 0.02335  |
| cg15402529 | 5.735282 | 1.715849 | 19.17037 | 0.004556 |
| cg26335633 | 5.73178  | 1.379558 | 23.81436 | 0.016272 |
| cg08475379 | 5.730143 | 1.223808 | 26.82981 | 0.026665 |
| cg23623622 | 5.72921  | 1.606895 | 20.42688 | 0.007119 |
| cg16848624 | 5.724285 | 1.68975  | 19.39189 | 0.005069 |
| cg26673012 | 5.721624 | 1.425514 | 22.96504 | 0.013895 |
| cg05107500 | 5.719681 | 1.383885 | 23.6398  | 0.016009 |
| cg07160746 | 5.714611 | 1.629466 | 20.0414  | 0.006477 |
| cg09522056 | 5.705293 | 1.68533  | 19.31395 | 0.005128 |
| cg06674731 | 5.703074 | 1.635886 | 19.88223 | 0.006287 |
| cg27190946 | 5.702414 | 1.53877  | 21.13215 | 0.009192 |
| cg04974913 | 5.702272 | 1.079327 | 30.12611 | 0.040379 |
| cg19430967 | 5.698553 | 1.540583 | 21.07871 | 0.00912  |
| cg10689404 | 5.692729 | 1.655816 | 19.57172 | 0.005774 |
| cg21475402 | 5.686965 | 1.610366 | 20.08336 | 0.006932 |
| cg17398677 | 5.669486 | 1.227053 | 26.19534 | 0.026283 |
| cg03156893 | 5.66056  | 1.597924 | 20.05223 | 0.007225 |
| cg22418909 | 5.659949 | 1.514356 | 21.15421 | 0.009969 |
| cg19628148 | 5.650887 | 1.494478 | 21.36701 | 0.01071  |
| cg24199834 | 5.648579 | 1.335929 | 23.88333 | 0.018588 |
| cg11301556 | 5.645375 | 1.281885 | 24.86202 | 0.022122 |
| cg21546671 | 5.643562 | 2.256095 | 14.11722 | 0.000216 |
| cg11464895 | 5.642251 | 1.488744 | 21.3838  | 0.010917 |
| cg04344565 | 5.636984 | 1.718279 | 18.49269 | 0.004331 |
| cg22660147 | 5.635352 | 1.832571 | 17.32931 | 0.002555 |
| cg01228134 | 5.624983 | 1.492676 | 21.19713 | 0.010718 |
| cg02438781 | 5.624415 | 1.4646   | 21.59911 | 0.011877 |
| cg18347642 | 5.621146 | 1.289342 | 24.50651 | 0.021548 |
| cg22873539 | 5.618556 | 1.308256 | 24.12997 | 0.02027  |
| cg04931256 | 5.610331 | 1.75417  | 17.94342 | 0.003645 |
| cg13610307 | 5.609869 | 1.854239 | 16.97226 | 0.002264 |

|            |          |          |          |          |
|------------|----------|----------|----------|----------|
| cg07442479 | 5.605698 | 1.517692 | 20.70502 | 0.009716 |
| cg06629130 | 5.596744 | 1.795288 | 17.44764 | 0.002991 |
| cg17294725 | 5.596063 | 1.76162  | 17.77677 | 0.003499 |
| cg08251037 | 5.593738 | 1.278401 | 24.47581 | 0.022248 |
| cg09302895 | 5.592992 | 1.590399 | 19.66901 | 0.007294 |
| cg08226590 | 5.592749 | 1.235537 | 25.316   | 0.02545  |
| cg11308643 | 5.590333 | 1.910385 | 16.35891 | 0.001681 |
| cg17236169 | 5.584283 | 1.469433 | 21.22195 | 0.01157  |
| cg18948722 | 5.576992 | 1.625527 | 19.13401 | 0.006288 |
| cg21000072 | 5.575854 | 1.358556 | 22.88471 | 0.017065 |
| cg13929328 | 5.572147 | 1.44949  | 21.42052 | 0.01241  |
| cg21647227 | 5.565806 | 1.724773 | 17.96074 | 0.00408  |
| cg03111498 | 5.565718 | 1.595354 | 19.41715 | 0.007089 |
| cg06472476 | 5.564009 | 1.103881 | 28.04487 | 0.037551 |
| cg27034819 | 5.558494 | 1.475003 | 20.94698 | 0.011272 |
| cg20792062 | 5.557932 | 1.374705 | 22.47072 | 0.016108 |
| cg04704053 | 5.557489 | 1.527605 | 20.21837 | 0.009241 |
| cg15889913 | 5.549573 | 1.623819 | 18.96625 | 0.006274 |
| cg12510458 | 5.549313 | 1.373975 | 22.41299 | 0.016127 |
| cg15841063 | 5.544641 | 1.53699  | 20.00211 | 0.008882 |
| cg15448975 | 5.539948 | 1.357459 | 22.60917 | 0.017038 |
| cg17834752 | 5.539206 | 1.466751 | 20.91888 | 0.011571 |
| cg23201513 | 5.537041 | 1.362069 | 22.509   | 0.016766 |
| cg10824063 | 5.533665 | 1.621667 | 18.8827  | 0.006296 |
| cg12160317 | 5.530538 | 1.375211 | 22.24157 | 0.016011 |
| cg00571033 | 5.529883 | 1.572693 | 19.44411 | 0.007681 |
| cg14654886 | 5.529828 | 1.915841 | 15.96114 | 0.001566 |
| cg08272731 | 5.526357 | 1.772719 | 17.22813 | 0.00321  |
| cg02582387 | 5.52409  | 1.748414 | 17.45328 | 0.003593 |
| cg11727383 | 5.520569 | 1.612957 | 18.89491 | 0.006499 |
| cg04598121 | 5.514759 | 1.306907 | 23.27065 | 0.020107 |
| cg13678973 | 5.513018 | 1.835783 | 16.55607 | 0.002345 |
| cg06218338 | 5.511447 | 1.377909 | 22.04503 | 0.015813 |
| cg27659903 | 5.509497 | 1.725134 | 17.59548 | 0.003972 |
| cg25191628 | 5.50775  | 1.515951 | 20.01075 | 0.009541 |
| cg06668555 | 5.507413 | 1.479612 | 20.4997  | 0.010953 |
| cg26844246 | 5.507351 | 1.205121 | 25.16835 | 0.027762 |
| cg19047707 | 5.50376  | 1.711549 | 17.69822 | 0.004213 |
| cg16599703 | 5.502008 | 1.556048 | 19.45447 | 0.008142 |
| cg08572611 | 5.492309 | 1.746844 | 17.26854 | 0.003564 |
| cg26836233 | 5.490607 | 1.600735 | 18.83308 | 0.006768 |
| cg19414741 | 5.487573 | 1.433391 | 21.00854 | 0.012932 |
| cg13063344 | 5.483067 | 1.874982 | 16.0343  | 0.001883 |
| cg22335876 | 5.482618 | 1.538111 | 19.54287 | 0.008693 |
| cg10552126 | 5.479159 | 1.259758 | 23.83091 | 0.023339 |
| cg00091285 | 5.467761 | 1.485982 | 20.11896 | 0.010593 |
| cg15762032 | 5.464811 | 1.645611 | 18.14776 | 0.005548 |
| cg18525486 | 5.463598 | 1.660456 | 17.97754 | 0.005199 |
| cg03964958 | 5.463492 | 1.382987 | 21.58353 | 0.015412 |
| cg03711485 | 5.462618 | 1.792621 | 16.64613 | 0.00282  |
| cg22813950 | 5.462309 | 1.354791 | 22.0232  | 0.016995 |
| cg03757784 | 5.456634 | 1.660412 | 17.93221 | 0.005185 |
| cg20051292 | 5.454283 | 1.583985 | 18.78125 | 0.007166 |
| cg03411507 | 5.453489 | 1.054372 | 28.20689 | 0.043062 |

|            |          |          |          |          |
|------------|----------|----------|----------|----------|
| cg21697851 | 5.441301 | 1.827389 | 16.20222 | 0.002343 |
| cg11342468 | 5.439627 | 1.797712 | 16.45956 | 0.002716 |
| cg05470523 | 5.436761 | 1.464171 | 20.18779 | 0.011419 |
| cg14568830 | 5.432712 | 1.28198  | 23.02247 | 0.021612 |
| cg01532168 | 5.425256 | 1.682855 | 17.49016 | 0.004634 |
| cg06598836 | 5.421058 | 1.989365 | 14.77249 | 0.000951 |
| cg17051321 | 5.420362 | 1.169051 | 25.13176 | 0.030809 |
| cg12377139 | 5.416422 | 1.588776 | 18.46555 | 0.006938 |
| cg18443359 | 5.413785 | 1.385162 | 21.15931 | 0.015164 |
| cg16768018 | 5.413722 | 1.609498 | 18.20965 | 0.006354 |
| cg18026588 | 5.413718 | 1.705583 | 17.18376 | 0.004158 |
| cg17741689 | 5.412037 | 1.556582 | 18.81696 | 0.007909 |
| cg06936155 | 5.409524 | 1.37155  | 21.33568 | 0.015899 |
| cg06179765 | 5.401254 | 1.428757 | 20.41883 | 0.012925 |
| cg27403265 | 5.399596 | 1.701141 | 17.13888 | 0.004216 |
| cg01392544 | 5.387615 | 1.963422 | 14.78357 | 0.001075 |
| cg18092028 | 5.38743  | 1.686256 | 17.21234 | 0.004488 |
| cg24431667 | 5.374572 | 1.4603   | 19.78089 | 0.011423 |
| cg22418829 | 5.372634 | 1.082755 | 26.65904 | 0.039662 |
| cg27328797 | 5.367221 | 2.175976 | 13.23868 | 0.000265 |
| cg07060551 | 5.362797 | 1.634736 | 17.59281 | 0.005592 |
| cg08152546 | 5.361896 | 1.378288 | 20.85916 | 0.015399 |
| cg00446413 | 5.361208 | 1.532824 | 18.75137 | 0.008575 |
| cg13365752 | 5.357224 | 1.513396 | 18.96387 | 0.009257 |
| cg11969556 | 5.350823 | 1.109579 | 25.80376 | 0.036663 |
| cg12296772 | 5.349023 | 2.164324 | 13.21985 | 0.000281 |
| cg03502002 | 5.348052 | 2.110704 | 13.55077 | 0.000408 |
| cg21091227 | 5.345854 | 1.41591  | 20.1836  | 0.013398 |
| cg01997272 | 5.326753 | 1.640393 | 17.29726 | 0.005376 |
| cg09194159 | 5.325995 | 1.808773 | 15.68258 | 0.002401 |
| cg03524083 | 5.322968 | 1.501914 | 18.86525 | 0.009597 |
| cg00922781 | 5.31641  | 1.371946 | 20.60156 | 0.015626 |
| cg26128092 | 5.313479 | 1.615374 | 17.47773 | 0.005971 |
| cg11874762 | 5.307375 | 1.663258 | 16.93557 | 0.004812 |
| cg05446629 | 5.299696 | 1.727197 | 16.26148 | 0.003553 |
| cg20717123 | 5.297069 | 1.622886 | 17.28953 | 0.005741 |
| cg10996058 | 5.293957 | 1.294056 | 21.65747 | 0.020417 |
| cg24693551 | 5.287395 | 1.801019 | 15.52263 | 0.00244  |
| cg16428251 | 5.287218 | 1.668598 | 16.7534  | 0.004654 |
| cg17098147 | 5.286232 | 1.554339 | 17.97822 | 0.007672 |
| cg08720517 | 5.282948 | 1.483851 | 18.80885 | 0.010197 |
| cg08582701 | 5.275388 | 1.339615 | 20.77441 | 0.017404 |
| cg17403609 | 5.274807 | 1.553746 | 17.90742 | 0.007662 |
| cg26053480 | 5.273713 | 1.953587 | 14.2364  | 0.001032 |
| cg21884231 | 5.272375 | 1.80009  | 15.44253 | 0.002429 |
| cg20302133 | 5.271847 | 1.79254  | 15.50446 | 0.002525 |
| cg10527010 | 5.269554 | 1.460427 | 19.01376 | 0.011135 |
| cg11412853 | 5.26865  | 1.6869   | 16.45543 | 0.004239 |
| cg09617993 | 5.268099 | 1.359805 | 20.40945 | 0.016184 |
| cg19806642 | 5.263782 | 1.53411  | 18.0609  | 0.008284 |
| cg03700449 | 5.263435 | 1.727063 | 16.04096 | 0.003489 |
| cg21802055 | 5.262184 | 1.712888 | 16.16602 | 0.003734 |
| cg15600488 | 5.261785 | 1.606267 | 17.23647 | 0.006092 |
| cg21012296 | 5.258662 | 1.754484 | 15.76163 | 0.003039 |

|            |          |          |          |          |
|------------|----------|----------|----------|----------|
| cg19416570 | 5.253833 | 1.373082 | 20.10278 | 0.015391 |
| cg20462512 | 5.253465 | 1.459195 | 18.91378 | 0.011144 |
| cg15731655 | 5.251412 | 1.737691 | 15.8701  | 0.00329  |
| cg08091192 | 5.251175 | 1.653614 | 16.6755  | 0.004907 |
| cg21701379 | 5.246818 | 1.408313 | 19.54758 | 0.013504 |
| cg20277905 | 5.239845 | 1.306165 | 21.02029 | 0.01945  |
| cg18578405 | 5.237866 | 1.577099 | 17.39602 | 0.006854 |
| cg08278741 | 5.235404 | 1.771129 | 15.4757  | 0.002757 |
| cg02109405 | 5.234367 | 1.503233 | 18.22645 | 0.009314 |
| cg00910518 | 5.229997 | 1.728035 | 15.82888 | 0.003411 |
| cg10241484 | 5.229518 | 1.250573 | 21.86827 | 0.023434 |
| cg07770968 | 5.22689  | 1.847172 | 14.79038 | 0.001832 |
| cg09660365 | 5.225318 | 1.234201 | 22.12277 | 0.02472  |
| cg11199046 | 5.222057 | 1.028133 | 26.52369 | 0.046215 |
| cg18380175 | 5.22138  | 1.399565 | 19.47949 | 0.013879 |
| cg22643811 | 5.220163 | 1.541831 | 17.67386 | 0.007912 |
| cg25888561 | 5.220021 | 1.528503 | 17.827   | 0.008363 |
| cg10023272 | 5.218182 | 1.19737  | 22.74103 | 0.027821 |
| cg20892260 | 5.216724 | 1.627389 | 16.72263 | 0.005447 |
| cg14486338 | 5.216623 | 1.590241 | 17.11261 | 0.006424 |
| cg24464397 | 5.216388 | 1.304095 | 20.86558 | 0.019525 |
| cg09972259 | 5.215026 | 1.4603   | 18.6239  | 0.010991 |
| cg14345497 | 5.212659 | 1.568995 | 17.31797 | 0.007033 |
| cg08263708 | 5.207869 | 1.365607 | 19.86069 | 0.015683 |
| cg25865467 | 5.205346 | 1.327531 | 20.41055 | 0.017964 |
| cg14785479 | 5.203919 | 1.086278 | 24.92988 | 0.039065 |
| cg20599066 | 5.203703 | 1.139383 | 23.76596 | 0.033309 |
| cg23208513 | 5.199017 | 1.591562 | 16.98318 | 0.006345 |
| cg24019371 | 5.198291 | 1.582312 | 17.07769 | 0.006605 |
| cg09968620 | 5.197325 | 1.554186 | 17.38027 | 0.007453 |
| cg25185173 | 5.197264 | 1.866044 | 14.4753  | 0.001613 |
| cg02172150 | 5.196285 | 1.699051 | 15.89203 | 0.003861 |
| cg07281879 | 5.191893 | 1.16742  | 23.09002 | 0.03052  |
| cg23003783 | 5.19122  | 1.524504 | 17.67707 | 0.008427 |
| cg15950068 | 5.191075 | 1.78527  | 15.09422 | 0.002493 |
| cg14699728 | 5.185188 | 1.891148 | 14.21685 | 0.001383 |
| cg10904109 | 5.178504 | 1.052743 | 25.47336 | 0.043053 |
| cg17361203 | 5.174714 | 1.517428 | 17.64674 | 0.008634 |
| cg02457680 | 5.174391 | 1.236178 | 21.65895 | 0.024435 |
| cg00152008 | 5.174256 | 1.674221 | 15.99128 | 0.004302 |
| cg16435571 | 5.173547 | 1.531271 | 17.47933 | 0.008147 |
| cg24811864 | 5.17299  | 1.506881 | 17.75842 | 0.009013 |
| cg02583418 | 5.170573 | 1.274325 | 20.97959 | 0.021493 |
| cg10097295 | 5.165188 | 1.04083  | 25.63258 | 0.044545 |
| cg20076842 | 5.160299 | 1.316084 | 20.23326 | 0.018575 |
| cg11747183 | 5.158331 | 1.616171 | 16.46384 | 0.005594 |
| cg10176110 | 5.154932 | 1.593431 | 16.6768  | 0.006187 |
| cg26990587 | 5.154357 | 1.586603 | 16.74483 | 0.006376 |
| cg12552771 | 5.153951 | 1.80439  | 14.72143 | 0.002197 |
| cg17777676 | 5.153707 | 1.59469  | 16.65571 | 0.006149 |
| cg09426834 | 5.14998  | 1.818631 | 14.58366 | 0.002028 |
| cg13566648 | 5.149625 | 1.364855 | 19.42963 | 0.01556  |
| cg21639114 | 5.146208 | 1.384997 | 19.12167 | 0.014433 |
| cg16823083 | 5.142169 | 1.600432 | 16.52173 | 0.005966 |

|            |          |          |          |          |
|------------|----------|----------|----------|----------|
| cg12306195 | 5.139301 | 1.31563  | 20.07586 | 0.018546 |
| cg22605415 | 5.135864 | 1.604184 | 16.44269 | 0.005851 |
| cg18988498 | 5.134024 | 1.405538 | 18.7531  | 0.013324 |
| cg09683350 | 5.132592 | 1.454566 | 18.11089 | 0.011009 |
| cg16001495 | 5.132454 | 1.608476 | 16.37704 | 0.005731 |
| cg26675654 | 5.132132 | 1.607868 | 16.38119 | 0.005746 |
| cg17864046 | 5.131865 | 1.477047 | 17.83019 | 0.010059 |
| cg25188395 | 5.131344 | 1.768895 | 14.88539 | 0.002616 |
| cg15556502 | 5.129885 | 1.897033 | 13.87204 | 0.001275 |
| cg17486097 | 5.128201 | 1.534822 | 17.13453 | 0.007907 |
| cg15837212 | 5.124993 | 1.396365 | 18.80995 | 0.013769 |
| cg19304150 | 5.124154 | 1.671515 | 15.70847 | 0.004253 |
| cg16086559 | 5.122194 | 1.801691 | 14.56236 | 0.002182 |
| cg01243371 | 5.122117 | 1.907229 | 13.75613 | 0.001192 |
| cg02621287 | 5.119013 | 1.91325  | 13.69622 | 0.001146 |
| cg04694035 | 5.114345 | 1.272555 | 20.55433 | 0.021472 |
| cg00497967 | 5.111241 | 1.395628 | 18.71902 | 0.013768 |
| cg00792424 | 5.108945 | 1.776727 | 14.69068 | 0.002474 |
| cg23054883 | 5.108456 | 1.383135 | 18.86751 | 0.014424 |
| cg10591652 | 5.108064 | 1.330981 | 19.60382 | 0.017471 |
| cg15386964 | 5.107657 | 2.211501 | 11.79658 | 0.000134 |
| cg00043788 | 5.100447 | 1.550978 | 16.77301 | 0.007306 |
| cg14565725 | 5.098341 | 1.680596 | 15.46659 | 0.004017 |
| cg03893271 | 5.09429  | 1.509679 | 17.19027 | 0.008697 |
| cg25203481 | 5.092946 | 1.077351 | 24.07581 | 0.039978 |
| cg24740868 | 5.091452 | 1.357771 | 19.09223 | 0.0158   |
| cg01638213 | 5.086617 | 1.784235 | 14.50126 | 0.002341 |
| cg17911318 | 5.084339 | 1.741768 | 14.84153 | 0.002928 |
| cg00027083 | 5.083951 | 1.608441 | 16.06932 | 0.005616 |
| cg05212802 | 5.080806 | 1.504955 | 17.15307 | 0.008834 |
| cg25733708 | 5.080695 | 1.47189  | 17.53763 | 0.010126 |
| cg16902509 | 5.078421 | 1.395554 | 18.48037 | 0.013675 |
| cg26115633 | 5.077586 | 1.852203 | 13.91958 | 0.001589 |
| cg14230666 | 5.075982 | 1.756125 | 14.67185 | 0.002702 |
| cg21431690 | 5.071858 | 1.036422 | 24.81976 | 0.045057 |
| cg06825039 | 5.066726 | 1.322525 | 19.41114 | 0.01789  |
| cg18326021 | 5.065762 | 1.551912 | 16.5357  | 0.007186 |
| cg23665381 | 5.060235 | 1.464516 | 17.48426 | 0.010375 |
| cg04316624 | 5.060157 | 1.200403 | 21.33049 | 0.027189 |
| cg11439596 | 5.059288 | 1.671601 | 15.3125  | 0.004114 |
| cg06495961 | 5.055013 | 1.742787 | 14.66223 | 0.00286  |
| cg20055426 | 5.054636 | 1.368217 | 18.67346 | 0.015092 |
| cg23618440 | 5.054554 | 1.474723 | 17.32429 | 0.009936 |
| cg18115040 | 5.050913 | 1.39041  | 18.34834 | 0.013865 |
| cg00589371 | 5.04684  | 1.630336 | 15.62292 | 0.004989 |
| cg08165221 | 5.046489 | 1.294359 | 19.67541 | 0.019721 |
| cg06066137 | 5.042309 | 1.163745 | 21.84747 | 0.030566 |
| cg20981086 | 5.041477 | 1.972675 | 12.88428 | 0.000727 |
| cg00534492 | 5.038311 | 1.312677 | 19.33803 | 0.018452 |
| cg18716164 | 5.034502 | 1.50566  | 16.83396 | 0.008679 |
| cg02658693 | 5.0345   | 1.331533 | 19.03535 | 0.017223 |
| cg24472231 | 5.033668 | 1.48431  | 17.07043 | 0.009491 |
| cg09311683 | 5.03156  | 1.805314 | 14.02338 | 0.002005 |
| cg03867465 | 5.029198 | 1.625508 | 15.55995 | 0.005063 |

|            |          |          |          |          |
|------------|----------|----------|----------|----------|
| cg08528626 | 5.028488 | 1.742896 | 14.50786 | 0.002812 |
| cg17555825 | 5.027627 | 1.424515 | 17.74431 | 0.012078 |
| cg03131298 | 5.019476 | 1.124619 | 22.40327 | 0.034529 |
| cg08857994 | 5.01924  | 1.071704 | 23.50721 | 0.040573 |
| cg02456226 | 5.016967 | 1.713202 | 14.69176 | 0.003261 |
| cg16907558 | 5.015558 | 1.656018 | 15.19054 | 0.004343 |
| cg22191326 | 5.014017 | 1.581745 | 15.89407 | 0.006164 |
| cg12744722 | 5.010488 | 1.443883 | 17.38714 | 0.011129 |
| cg25993718 | 5.010411 | 1.382691 | 18.15606 | 0.014157 |
| cg27630311 | 5.008304 | 1.274482 | 19.68103 | 0.021037 |
| cg03383508 | 5.006723 | 1.500574 | 16.70513 | 0.00879  |
| cg02757432 | 5.002849 | 1.147375 | 21.8137  | 0.032117 |
| cg09614415 | 5.002189 | 1.337879 | 18.70266 | 0.016731 |
| cg05832051 | 5.001107 | 1.145681 | 21.83075 | 0.032287 |
| cg23305567 | 4.999517 | 1.269073 | 19.69561 | 0.021414 |
| cg26720125 | 4.994819 | 1.536167 | 16.24057 | 0.007505 |
| cg20266316 | 4.994163 | 1.556499 | 16.02421 | 0.006856 |
| cg26504021 | 4.990515 | 1.681089 | 14.81495 | 0.003784 |
| cg06482428 | 4.988774 | 1.428545 | 17.42183 | 0.01177  |
| cg26503073 | 4.988139 | 1.310809 | 18.98181 | 0.018429 |
| cg19079845 | 4.986809 | 1.625174 | 15.30191 | 0.004971 |
| cg14944647 | 4.985897 | 1.791576 | 13.87559 | 0.002094 |
| cg01715455 | 4.985593 | 1.676118 | 14.82958 | 0.00387  |
| cg05956679 | 4.982557 | 1.21714  | 20.39689 | 0.025534 |
| cg02523640 | 4.982535 | 1.651487 | 15.0323  | 0.004367 |
| cg08089301 | 4.98227  | 1.603439 | 15.48111 | 0.0055   |
| cg09388605 | 4.980102 | 1.432629 | 17.31182 | 0.011553 |
| cg11097433 | 4.979838 | 1.853477 | 13.37961 | 0.001454 |
| cg18279094 | 4.978619 | 1.625067 | 15.25269 | 0.004955 |
| cg02792792 | 4.975106 | 1.558805 | 15.87863 | 0.006735 |
| cg22167515 | 4.974996 | 1.747484 | 14.16355 | 0.00265  |
| cg05732750 | 4.971221 | 1.315991 | 18.77903 | 0.018035 |
| cg03193589 | 4.968824 | 1.719329 | 14.3598  | 0.003068 |
| cg03044249 | 4.967704 | 1.861922 | 13.2541  | 0.001367 |
| cg02279719 | 4.964823 | 1.616092 | 15.25251 | 0.005139 |
| cg06675190 | 4.961361 | 1.396039 | 17.6321  | 0.013299 |
| cg21926708 | 4.959811 | 1.313032 | 18.73505 | 0.018197 |
| cg25306611 | 4.959585 | 1.435896 | 17.13041 | 0.01134  |
| cg16419235 | 4.958842 | 1.271574 | 19.33833 | 0.021112 |
| cg22634378 | 4.95693  | 1.475204 | 16.6561  | 0.009634 |
| cg11626496 | 4.955683 | 1.422224 | 17.26788 | 0.011971 |
| cg14383828 | 4.955238 | 1.087482 | 22.57911 | 0.038607 |
| cg19407095 | 4.953535 | 1.013225 | 24.21724 | 0.048133 |
| cg03323462 | 4.953251 | 1.685467 | 14.55662 | 0.003625 |
| cg22685409 | 4.950974 | 1.331097 | 18.415   | 0.017    |
| cg00831710 | 4.949897 | 1.027534 | 23.84494 | 0.046171 |
| cg15554678 | 4.949727 | 1.120177 | 21.87135 | 0.034887 |
| cg06228507 | 4.949553 | 1.330258 | 18.41603 | 0.017049 |
| cg07033372 | 4.947722 | 1.333736 | 18.35442 | 0.016824 |
| cg19326876 | 4.933152 | 1.500804 | 16.2153  | 0.008572 |
| cg01567634 | 4.93236  | 1.342572 | 18.12057 | 0.016231 |
| cg01452847 | 4.931083 | 1.783283 | 13.63529 | 0.002107 |
| cg18365865 | 4.929849 | 1.43845  | 16.89556 | 0.011134 |
| cg22605303 | 4.929372 | 1.28434  | 18.91921 | 0.020091 |

|            |          |          |          |          |
|------------|----------|----------|----------|----------|
| cg11229862 | 4.92898  | 1.283147 | 18.9338  | 0.020176 |
| cg03816707 | 4.9246   | 1.167571 | 20.77105 | 0.029936 |
| cg15829006 | 4.923091 | 1.222359 | 19.82792 | 0.024933 |
| cg25234732 | 4.92011  | 1.672522 | 14.47364 | 0.003801 |
| cg13702996 | 4.917846 | 1.210915 | 19.97268 | 0.025907 |
| cg01423964 | 4.917571 | 1.566508 | 15.4372  | 0.006353 |
| cg23291301 | 4.909149 | 1.406347 | 17.13641 | 0.01261  |
| cg04549162 | 4.906935 | 1.36969  | 17.57917 | 0.01456  |
| cg00619126 | 4.90556  | 1.512012 | 15.91556 | 0.008086 |
| cg16334314 | 4.894988 | 1.687701 | 14.19737 | 0.003464 |
| cg14008883 | 4.890565 | 1.125794 | 21.24513 | 0.034169 |
| cg20673829 | 4.886393 | 1.569797 | 15.21014 | 0.006175 |
| cg10373086 | 4.88639  | 1.021547 | 23.37319 | 0.04696  |
| cg08676249 | 4.885882 | 1.567271 | 15.23148 | 0.006247 |
| cg01574673 | 4.881466 | 1.431301 | 16.64829 | 0.011315 |
| cg26809635 | 4.878871 | 1.978963 | 12.02821 | 0.000576 |
| cg10671668 | 4.869705 | 1.468717 | 16.14608 | 0.00964  |
| cg11554266 | 4.868549 | 1.218653 | 19.44997 | 0.025104 |
| cg03909500 | 4.867804 | 1.114947 | 21.25259 | 0.035321 |
| cg22931725 | 4.866391 | 1.094061 | 21.64573 | 0.037707 |
| cg11763094 | 4.866109 | 1.500826 | 15.77733 | 0.008377 |
| cg06873316 | 4.863383 | 1.477905 | 16.00407 | 0.009248 |
| cg04198308 | 4.862682 | 1.66848  | 14.17198 | 0.003756 |
| cg03794801 | 4.862637 | 1.3519   | 17.49037 | 0.015452 |
| cg15086113 | 4.861214 | 1.467914 | 16.09863 | 0.009647 |
| cg03442378 | 4.859255 | 1.534924 | 15.38341 | 0.007173 |
| cg00814733 | 4.853955 | 1.739914 | 13.54141 | 0.002545 |
| cg27050153 | 4.85261  | 1.255291 | 18.75886 | 0.022048 |
| cg23397578 | 4.850684 | 1.022848 | 23.00355 | 0.046766 |
| cg21779611 | 4.850579 | 1.867111 | 12.60135 | 0.001188 |
| cg20695433 | 4.849366 | 1.398308 | 16.81772 | 0.012833 |
| cg11835068 | 4.849061 | 1.36057  | 17.28202 | 0.014899 |
| cg19224201 | 4.844501 | 1.602735 | 14.64321 | 0.005177 |
| cg16795307 | 4.841194 | 1.638233 | 14.30636 | 0.004333 |
| cg02825211 | 4.841191 | 1.557326 | 15.0496  | 0.006421 |
| cg00467420 | 4.831312 | 1.590835 | 14.67254 | 0.005451 |
| cg00030508 | 4.831039 | 1.211379 | 19.26643 | 0.025637 |
| cg18097850 | 4.82812  | 1.115067 | 20.90525 | 0.035237 |
| cg00046625 | 4.82793  | 1.379705 | 16.89412 | 0.013754 |
| cg22130262 | 4.825896 | 1.389635 | 16.75928 | 0.013213 |
| cg19651694 | 4.824918 | 1.367161 | 17.02787 | 0.014444 |
| cg15484532 | 4.820633 | 1.30149  | 17.8553  | 0.018553 |
| cg23758305 | 4.819866 | 1.592682 | 14.58616 | 0.005373 |
| cg26682580 | 4.818875 | 1.513445 | 15.3435  | 0.007785 |
| cg13139972 | 4.815646 | 1.619686 | 14.31786 | 0.004693 |
| cg18454863 | 4.813265 | 1.089508 | 21.26421 | 0.038167 |
| cg09022422 | 4.812059 | 1.397897 | 16.56482 | 0.012736 |
| cg14794043 | 4.810902 | 1.300094 | 17.80239 | 0.018619 |
| cg06966113 | 4.809365 | 1.256088 | 18.4143  | 0.021859 |
| cg15461335 | 4.807626 | 1.386109 | 16.67493 | 0.013342 |
| cg22868282 | 4.805229 | 1.790821 | 12.89366 | 0.001827 |
| cg17466857 | 4.803323 | 1.803211 | 12.7949  | 0.001693 |
| cg15617814 | 4.802032 | 1.824923 | 12.63588 | 0.00148  |
| cg04958794 | 4.80134  | 1.364755 | 16.89158 | 0.014506 |



|            |          |          |          |          |
|------------|----------|----------|----------|----------|
| cg03175653 | 4.799235 | 1.575087 | 14.6231  | 0.005795 |
| cg02864757 | 4.795093 | 1.487758 | 15.45475 | 0.008658 |
| cg00157668 | 4.790878 | 1.408796 | 16.29229 | 0.012115 |
| cg14323675 | 4.789762 | 1.299772 | 17.65064 | 0.018575 |
| cg23990012 | 4.788295 | 1.429456 | 16.03951 | 0.011109 |
| cg04842426 | 4.787671 | 1.496639 | 15.31551 | 0.0083   |
| cg13909534 | 4.78751  | 1.314355 | 17.43841 | 0.017577 |
| cg00336320 | 4.787308 | 1.262157 | 18.15806 | 0.021321 |
| cg07489048 | 4.786863 | 1.253056 | 18.28654 | 0.02203  |
| cg04778012 | 4.785569 | 1.473837 | 15.53881 | 0.009175 |
| cg02237470 | 4.784258 | 1.604885 | 14.26216 | 0.004973 |
| cg02347074 | 4.783713 | 1.390291 | 16.4598  | 0.013042 |
| cg04217778 | 4.780677 | 1.784196 | 12.80962 | 0.001863 |
| cg21995919 | 4.778473 | 1.698557 | 13.44306 | 0.003038 |
| cg17252960 | 4.775944 | 1.655638 | 13.77695 | 0.003819 |
| cg09619271 | 4.773415 | 1.795948 | 12.68717 | 0.001725 |
| cg13939859 | 4.772263 | 1.4968   | 15.21546 | 0.008248 |
| cg08813062 | 4.772203 | 1.328289 | 17.1453  | 0.016619 |
| cg06652199 | 4.770333 | 1.572552 | 14.47079 | 0.005789 |
| cg18417954 | 4.768777 | 1.296291 | 17.54331 | 0.018751 |
| cg19142026 | 4.762846 | 1.978141 | 11.46769 | 0.000499 |
| cg22757824 | 4.759775 | 1.716081 | 13.20186 | 0.002722 |
| cg24575234 | 4.755596 | 1.544091 | 14.64661 | 0.006589 |
| cg00017437 | 4.754422 | 1.401711 | 16.12638 | 0.012354 |
| cg10177394 | 4.746567 | 1.137946 | 19.79873 | 0.032573 |
| cg27423760 | 4.743199 | 1.495935 | 15.03939 | 0.008193 |
| cg14562712 | 4.743117 | 1.969807 | 11.42099 | 0.000517 |
| cg16234978 | 4.740663 | 1.856491 | 12.10557 | 0.00114  |
| cg03696599 | 4.739954 | 1.218685 | 18.43557 | 0.024746 |
| cg18297437 | 4.735104 | 1.419674 | 15.7932  | 0.011402 |
| cg27237300 | 4.734983 | 1.495758 | 14.9891  | 0.008174 |
| cg14552379 | 4.732367 | 1.343306 | 16.67178 | 0.01555  |
| cg03307893 | 4.729673 | 1.434126 | 15.59822 | 0.010706 |
| cg03700462 | 4.729539 | 1.148968 | 19.46838 | 0.031373 |
| cg11793269 | 4.72717  | 1.436843 | 15.55224 | 0.010573 |
| cg00933210 | 4.71961  | 1.065737 | 20.90077 | 0.040971 |
| cg24496475 | 4.715031 | 1.016871 | 21.86266 | 0.047553 |
| cg18734428 | 4.714234 | 1.678413 | 13.24108 | 0.003253 |
| cg10286380 | 4.714221 | 1.240056 | 17.92168 | 0.022861 |
| cg21816308 | 4.711792 | 1.227611 | 18.08471 | 0.023896 |
| cg09230996 | 4.70647  | 1.55304  | 14.2629  | 0.006178 |
| cg08938584 | 4.702213 | 1.069602 | 20.672   | 0.04046  |
| cg04606210 | 4.700902 | 1.424068 | 15.51785 | 0.01108  |
| cg13519035 | 4.700895 | 1.56475  | 14.12265 | 0.005821 |
| cg02011374 | 4.698437 | 1.378462 | 16.01444 | 0.013399 |
| cg13464448 | 4.696484 | 1.676232 | 13.15866 | 0.003254 |
| cg10908460 | 4.696482 | 1.649872 | 13.36888 | 0.003755 |
| cg09816507 | 4.696414 | 1.203312 | 18.32965 | 0.025991 |
| cg14859460 | 4.694412 | 1.54913  | 14.22573 | 0.006262 |
| cg26198463 | 4.691382 | 1.117258 | 19.69917 | 0.034736 |
| cg22746058 | 4.686845 | 1.211335 | 18.13415 | 0.025241 |
| cg23615741 | 4.686199 | 1.861305 | 11.79842 | 0.001043 |
| cg20539752 | 4.684488 | 1.149489 | 19.0906  | 0.031215 |
| cg22153181 | 4.682937 | 1.808834 | 12.12378 | 0.001467 |

|            |          |          |          |          |
|------------|----------|----------|----------|----------|
| cg02150988 | 4.68137  | 1.13848  | 19.24955 | 0.032375 |
| cg16712637 | 4.680553 | 1.213031 | 18.0602  | 0.025073 |
| cg02409815 | 4.679913 | 1.257178 | 17.42122 | 0.021378 |
| cg09434193 | 4.677584 | 1.491851 | 14.66621 | 0.008144 |
| cg03951603 | 4.676372 | 1.687878 | 12.95619 | 0.003009 |
| cg18172877 | 4.675571 | 1.540908 | 14.18706 | 0.006461 |
| cg26980244 | 4.674612 | 1.444168 | 15.1312  | 0.010075 |
| cg07860213 | 4.674106 | 1.477007 | 14.79158 | 0.008703 |
| cg20890210 | 4.668854 | 1.536877 | 14.18344 | 0.006568 |
| cg05622465 | 4.663932 | 1.347732 | 16.13991 | 0.015053 |
| cg12164282 | 4.661196 | 1.313652 | 16.53919 | 0.017211 |
| cg19870512 | 4.66092  | 1.723866 | 12.60201 | 0.002421 |
| cg27454136 | 4.657654 | 1.695895 | 12.79191 | 0.002839 |
| cg27316886 | 4.653836 | 1.212658 | 17.86009 | 0.025028 |
| cg09234616 | 4.653562 | 1.514234 | 14.30138 | 0.007269 |
| cg08432727 | 4.651296 | 1.380695 | 15.66932 | 0.013119 |
| cg03755123 | 4.651219 | 1.196695 | 18.07798 | 0.026473 |
| cg19727439 | 4.649881 | 1.255344 | 17.22348 | 0.021428 |
| cg25189564 | 4.64819  | 1.702178 | 12.69295 | 0.00272  |
| cg02662277 | 4.647076 | 1.631689 | 13.23495 | 0.004017 |
| cg20403938 | 4.638568 | 1.587426 | 13.55422 | 0.005037 |
| cg19632594 | 4.638112 | 1.285286 | 16.7372  | 0.019115 |
| cg06962177 | 4.637318 | 1.768477 | 12.16002 | 0.001814 |
| cg00596508 | 4.634021 | 1.446249 | 14.84817 | 0.009851 |
| cg21135135 | 4.633704 | 1.621427 | 13.24217 | 0.004209 |
| cg03462380 | 4.632614 | 1.38861  | 15.45511 | 0.01263  |
| cg16424078 | 4.63081  | 1.324858 | 16.18619 | 0.016371 |
| cg03401738 | 4.630225 | 1.428472 | 15.00833 | 0.01064  |
| cg00213479 | 4.626051 | 1.727754 | 12.38622 | 0.002302 |
| cg26988423 | 4.62369  | 1.322092 | 16.17021 | 0.016527 |
| cg06685968 | 4.619345 | 1.797834 | 11.86892 | 0.001482 |
| cg21106486 | 4.616782 | 1.251397 | 17.03271 | 0.021638 |
| cg02093732 | 4.616704 | 1.223703 | 17.41759 | 0.023948 |
| cg07811198 | 4.614193 | 1.379134 | 15.43779 | 0.013077 |
| cg18485844 | 4.614055 | 1.68465  | 12.63734 | 0.002934 |
| cg24556441 | 4.613989 | 1.544603 | 13.78276 | 0.006169 |
| cg06594404 | 4.613853 | 1.409309 | 15.10502 | 0.011505 |
| cg19193956 | 4.613717 | 1.540513 | 13.81772 | 0.006294 |
| cg24061141 | 4.61268  | 1.210945 | 17.57042 | 0.025061 |
| cg11073773 | 4.61212  | 1.494318 | 14.23502 | 0.007849 |
| cg17241776 | 4.61157  | 1.597509 | 13.31234 | 0.004713 |
| cg07780543 | 4.611569 | 1.507303 | 14.10902 | 0.007381 |
| cg25482900 | 4.611299 | 1.378297 | 15.42779 | 0.013113 |
| cg00579520 | 4.60956  | 1.158969 | 18.33357 | 0.030052 |
| cg01381846 | 4.607318 | 1.50569  | 14.09811 | 0.007425 |
| cg05044185 | 4.606762 | 1.19168  | 17.80869 | 0.026818 |
| cg19064258 | 4.605102 | 1.442994 | 14.69651 | 0.009899 |
| cg16981024 | 4.60461  | 1.406222 | 15.07759 | 0.011627 |
| cg14273116 | 4.60187  | 1.010372 | 20.95981 | 0.048461 |
| cg22489321 | 4.599846 | 1.411756 | 14.98742 | 0.011336 |
| cg19505136 | 4.599794 | 1.79699  | 11.77419 | 0.001462 |
| cg10175795 | 4.597993 | 1.469894 | 14.38303 | 0.008743 |
| cg18657094 | 4.593642 | 1.390625 | 15.17414 | 0.01239  |
| cg18777119 | 4.587633 | 1.577951 | 13.33779 | 0.005148 |

|            |          |          |          |          |
|------------|----------|----------|----------|----------|
| cg12782992 | 4.584989 | 1.24801  | 16.84452 | 0.021809 |
| cg13358636 | 4.577832 | 1.310309 | 15.99359 | 0.017153 |
| cg12877723 | 4.576787 | 1.359002 | 15.4135  | 0.014084 |
| cg19125370 | 4.569365 | 1.460127 | 14.2995  | 0.009047 |
| cg25121513 | 4.566506 | 1.482657 | 14.0646  | 0.008141 |
| cg02344833 | 4.562818 | 1.517643 | 13.71818 | 0.006877 |
| cg21183256 | 4.562746 | 1.532322 | 13.58634 | 0.0064   |
| cg01870995 | 4.56247  | 1.571001 | 13.25023 | 0.005265 |
| cg27473895 | 4.558076 | 1.563314 | 13.28975 | 0.005464 |
| cg21649258 | 4.557478 | 1.696267 | 12.2449  | 0.002631 |
| cg17554604 | 4.556012 | 1.55935  | 13.31147 | 0.00557  |
| cg09022943 | 4.555055 | 1.363529 | 15.21679 | 0.013746 |
| cg15638709 | 4.55501  | 1.512884 | 13.71428 | 0.007014 |
| cg15634398 | 4.553629 | 1.253017 | 16.54849 | 0.021304 |
| cg04043571 | 4.552591 | 1.021217 | 20.29547 | 0.046868 |
| cg03369269 | 4.549658 | 1.384923 | 14.94623 | 0.01254  |
| cg03659519 | 4.549269 | 1.474028 | 14.04034 | 0.00842  |
| cg09624466 | 4.549163 | 1.77452  | 11.66224 | 0.00161  |
| cg02720618 | 4.548797 | 1.237118 | 16.72561 | 0.022592 |
| cg08806408 | 4.547791 | 1.609814 | 12.84769 | 0.004256 |
| cg21480165 | 4.545725 | 1.199784 | 17.22279 | 0.025883 |
| cg26857670 | 4.545112 | 1.477562 | 13.98117 | 0.008268 |
| cg04330449 | 4.544859 | 1.568745 | 13.16706 | 0.005277 |
| cg08475953 | 4.539681 | 1.308443 | 15.75055 | 0.017148 |
| cg03804213 | 4.536081 | 1.322719 | 15.55586 | 0.016182 |
| cg14146100 | 4.535558 | 1.280157 | 16.06935 | 0.019148 |
| cg16696270 | 4.532507 | 1.168063 | 17.58776 | 0.028924 |
| cg12159189 | 4.530483 | 1.33784  | 15.3421  | 0.015197 |
| cg18961681 | 4.529186 | 1.499052 | 13.68433 | 0.007416 |
| cg09227138 | 4.526554 | 1.260749 | 16.252   | 0.0206   |
| cg22717227 | 4.524926 | 1.133914 | 18.05689 | 0.032521 |
| cg12040830 | 4.524829 | 1.698563 | 12.05376 | 0.00253  |
| cg17694795 | 4.521237 | 1.400003 | 14.60111 | 0.011652 |
| cg03365311 | 4.52033  | 1.386156 | 14.74104 | 0.012371 |
| cg12718339 | 4.5185   | 1.116687 | 18.2834  | 0.034454 |
| cg27501878 | 4.517441 | 1.790739 | 11.39601 | 0.001403 |
| cg00983904 | 4.5172   | 1.777992 | 11.47648 | 0.001526 |
| cg12776966 | 4.516179 | 1.394668 | 14.62417 | 0.011908 |
| cg24224020 | 4.51393  | 1.432822 | 14.22058 | 0.010046 |
| cg01200640 | 4.512492 | 1.478996 | 13.76785 | 0.008106 |
| cg23720732 | 4.511591 | 1.746695 | 11.65312 | 0.001859 |
| cg20631014 | 4.510945 | 1.32891  | 15.31227 | 0.015692 |
| cg03091551 | 4.510422 | 1.402602 | 14.50441 | 0.011482 |
| cg04606861 | 4.510003 | 1.15623  | 17.59177 | 0.030083 |
| cg03599078 | 4.507863 | 1.237531 | 16.42046 | 0.022425 |
| cg21858380 | 4.507601 | 1.474041 | 13.78419 | 0.008283 |
| cg05771261 | 4.504397 | 1.086565 | 18.67315 | 0.038043 |
| cg00803827 | 4.50349  | 1.369142 | 14.81323 | 0.013244 |
| cg08620606 | 4.503171 | 1.080943 | 18.76006 | 0.038746 |
| cg16415058 | 4.501301 | 1.332189 | 15.20934 | 0.015449 |
| cg04894619 | 4.500149 | 1.269622 | 15.95068 | 0.019821 |
| cg05206884 | 4.497476 | 1.40005  | 14.44755 | 0.011566 |
| cg14866863 | 4.496121 | 1.505643 | 13.42623 | 0.007079 |
| cg20611911 | 4.495279 | 1.5205   | 13.29006 | 0.006575 |

|            |          |          |          |          |
|------------|----------|----------|----------|----------|
| cg14752336 | 4.495126 | 1.158628 | 17.43973 | 0.029794 |
| cg02370605 | 4.49171  | 1.420097 | 14.2071  | 0.01056  |
| cg07557260 | 4.489292 | 1.27864  | 15.76186 | 0.019101 |
| cg06159486 | 4.486745 | 1.284293 | 15.67469 | 0.018673 |
| cg18335607 | 4.485099 | 1.118341 | 17.98745 | 0.034192 |
| cg09251429 | 4.484447 | 1.54556  | 13.01163 | 0.005762 |
| cg04738965 | 4.481631 | 1.413439 | 14.21003 | 0.010844 |
| cg09887059 | 4.4813   | 1.527483 | 13.14715 | 0.006307 |
| cg02721665 | 4.480749 | 1.294114 | 15.51417 | 0.017941 |
| cg07871947 | 4.479658 | 1.115128 | 17.99554 | 0.034554 |
| cg04138185 | 4.475523 | 1.656238 | 12.09385 | 0.003129 |
| cg14001664 | 4.475519 | 1.005499 | 19.92073 | 0.049165 |
| cg05736768 | 4.475479 | 1.408465 | 14.22109 | 0.011066 |
| cg01054478 | 4.474692 | 1.270252 | 15.76292 | 0.019685 |
| cg07035961 | 4.474663 | 1.240546 | 16.14016 | 0.022063 |
| cg15044957 | 4.473588 | 1.563177 | 12.80277 | 0.005228 |
| cg10723962 | 4.473496 | 1.198784 | 16.69372 | 0.02576  |
| cg27032232 | 4.471597 | 1.653419 | 12.09323 | 0.003172 |
| cg16021909 | 4.471411 | 1.343033 | 14.88683 | 0.014664 |
| cg00699993 | 4.470387 | 1.576342 | 12.67768 | 0.004867 |
| cg09430118 | 4.465502 | 1.139718 | 17.49618 | 0.03174  |
| cg02739346 | 4.462249 | 1.25374  | 15.88182 | 0.020939 |
| cg23156916 | 4.462235 | 1.379674 | 14.43206 | 0.012512 |
| cg13272644 | 4.460884 | 1.19861  | 16.60214 | 0.025738 |
| cg24842733 | 4.459074 | 1.354042 | 14.68443 | 0.013956 |
| cg23771603 | 4.458298 | 1.703563 | 11.66756 | 0.002325 |
| cg20977794 | 4.4578   | 1.29952  | 15.29178 | 0.017476 |
| cg09175749 | 4.457584 | 1.068511 | 18.59601 | 0.040277 |
| cg27659787 | 4.455311 | 1.13519  | 17.48588 | 0.032215 |
| cg14768785 | 4.454135 | 1.692611 | 11.72114 | 0.002478 |
| cg02300154 | 4.453217 | 1.729971 | 11.46328 | 0.001961 |
| cg22802813 | 4.452783 | 1.42913  | 13.87367 | 0.010002 |
| cg24221648 | 4.452271 | 1.559417 | 12.71162 | 0.00527  |
| cg10242602 | 4.450857 | 1.527583 | 12.96828 | 0.00621  |
| cg21899596 | 4.447271 | 1.49433  | 13.23551 | 0.007322 |
| cg11346837 | 4.446532 | 1.400422 | 14.11835 | 0.011365 |
| cg11214140 | 4.44582  | 1.438492 | 13.74031 | 0.009555 |
| cg06243400 | 4.43958  | 1.168777 | 16.86366 | 0.028597 |
| cg07846220 | 4.439121 | 1.548778 | 12.72345 | 0.005533 |
| cg11183632 | 4.439031 | 1.352589 | 14.56836 | 0.013969 |
| cg22650617 | 4.436036 | 1.464797 | 13.43423 | 0.00841  |
| cg07963234 | 4.431752 | 1.452576 | 13.5211  | 0.008898 |
| cg05209584 | 4.430407 | 1.451201 | 13.5257  | 0.008951 |
| cg17541528 | 4.427745 | 1.523052 | 12.87213 | 0.006283 |
| cg11601252 | 4.427687 | 1.573298 | 12.46071 | 0.004827 |
| cg13298841 | 4.422342 | 1.704396 | 11.47451 | 0.002243 |
| cg24072202 | 4.41814  | 1.063364 | 18.3568  | 0.040903 |
| cg11893763 | 4.411539 | 1.33254  | 14.60495 | 0.015099 |
| cg24934063 | 4.411373 | 1.271975 | 15.29921 | 0.01933  |
| cg11907729 | 4.409312 | 1.605093 | 12.11272 | 0.004006 |
| cg08286181 | 4.408299 | 1.467653 | 13.24094 | 0.008201 |
| cg19484420 | 4.405982 | 1.285297 | 15.10365 | 0.018311 |
| cg08189801 | 4.404466 | 1.20769  | 16.06315 | 0.024716 |
| cg23676682 | 4.404161 | 1.424178 | 13.61953 | 0.010058 |

|            |          |          |          |          |
|------------|----------|----------|----------|----------|
| cg19623360 | 4.403046 | 1.013037 | 19.13731 | 0.048014 |
| cg25181651 | 4.40229  | 1.44644  | 13.39852 | 0.009056 |
| cg14134497 | 4.401637 | 1.603197 | 12.08485 | 0.004028 |
| cg18096722 | 4.400374 | 1.545072 | 12.53229 | 0.005525 |
| cg21229268 | 4.397616 | 1.383046 | 13.98292 | 0.012093 |
| cg07027430 | 4.397202 | 1.304087 | 14.82676 | 0.016936 |
| cg23642130 | 4.395859 | 1.517326 | 12.73528 | 0.006368 |
| cg17653824 | 4.394064 | 1.07151  | 18.01924 | 0.039793 |
| cg16407471 | 4.391631 | 1.45897  | 13.2192  | 0.008493 |
| cg26348902 | 4.391282 | 1.228986 | 15.69047 | 0.022767 |
| cg08490115 | 4.390629 | 1.507527 | 12.78758 | 0.006677 |
| cg00100012 | 4.390421 | 1.086394 | 17.74292 | 0.03787  |
| cg00332937 | 4.389973 | 1.534763 | 12.5569  | 0.0058   |
| cg13576883 | 4.389334 | 1.440928 | 13.37072 | 0.009249 |
| cg05057720 | 4.388218 | 1.601179 | 12.02643 | 0.004039 |
| cg25335557 | 4.388065 | 1.113136 | 17.29808 | 0.034591 |
| cg17093995 | 4.387903 | 1.634113 | 11.78235 | 0.003342 |
| cg24937747 | 4.385168 | 1.121279 | 17.14979 | 0.03363  |
| cg03530754 | 4.383386 | 1.491922 | 12.87874 | 0.007199 |
| cg16086620 | 4.38338  | 1.606778 | 11.9581  | 0.0039   |
| cg12640000 | 4.381821 | 1.040433 | 18.45419 | 0.04401  |
| cg09686443 | 4.381727 | 1.322242 | 14.52043 | 0.015653 |
| cg05081498 | 4.380765 | 1.447189 | 13.26095 | 0.008948 |
| cg14289542 | 4.37853  | 1.272558 | 15.06534 | 0.019167 |
| cg11850773 | 4.378144 | 1.397652 | 13.71454 | 0.011256 |
| cg15590989 | 4.376327 | 1.60108  | 11.96207 | 0.00401  |
| cg23207990 | 4.376203 | 1.500583 | 12.76248 | 0.006868 |
| cg09969277 | 4.372325 | 1.428536 | 13.38239 | 0.009742 |
| cg20997792 | 4.372308 | 1.041288 | 18.35907 | 0.043881 |
| cg06335867 | 4.36947  | 1.489636 | 12.81673 | 0.007235 |
| cg24613080 | 4.368614 | 1.066601 | 17.89309 | 0.040404 |
| cg16767801 | 4.368598 | 1.450688 | 13.15559 | 0.008757 |
| cg01718742 | 4.367728 | 1.208172 | 15.79001 | 0.024552 |
| cg01805540 | 4.366332 | 1.664722 | 11.45228 | 0.002736 |
| cg10239098 | 4.365352 | 1.673874 | 11.38455 | 0.002584 |
| cg19884262 | 4.363784 | 1.424159 | 13.37113 | 0.009913 |
| cg26425256 | 4.362113 | 1.247161 | 15.25707 | 0.021127 |
| cg10731700 | 4.360932 | 1.733706 | 10.96941 | 0.001753 |
| cg23712342 | 4.360908 | 1.104223 | 17.22253 | 0.035603 |
| cg24101492 | 4.358991 | 1.367433 | 13.89523 | 0.012809 |
| cg22536150 | 4.355281 | 1.239959 | 15.29767 | 0.021704 |
| cg00582971 | 4.354564 | 1.538795 | 12.32278 | 0.005571 |
| cg09559950 | 4.35418  | 1.022338 | 18.54464 | 0.046608 |
| cg00489401 | 4.352571 | 1.331673 | 14.22637 | 0.014933 |
| cg21266559 | 4.350405 | 1.299212 | 14.56731 | 0.017103 |
| cg20253468 | 4.350184 | 1.223321 | 15.46946 | 0.023124 |
| cg07919443 | 4.345194 | 1.594846 | 11.83858 | 0.004069 |
| cg22356339 | 4.343008 | 1.328301 | 14.19988 | 0.015113 |
| cg03078269 | 4.342669 | 1.531738 | 12.31201 | 0.005746 |
| cg17011276 | 4.341637 | 1.19008  | 15.83912 | 0.026182 |
| cg26492446 | 4.341021 | 1.707334 | 11.03737 | 0.002046 |
| cg07665387 | 4.339748 | 1.305267 | 14.42879 | 0.01664  |
| cg16675507 | 4.338678 | 1.428315 | 13.17926 | 0.00963  |
| cg06329574 | 4.337569 | 1.487709 | 12.64663 | 0.007198 |

|            |          |          |          |          |
|------------|----------|----------|----------|----------|
| cg07438617 | 4.336789 | 1.744426 | 10.78162 | 0.001591 |
| cg15107670 | 4.336461 | 1.226857 | 15.3277  | 0.022766 |
| cg06110297 | 4.333495 | 1.157542 | 16.22333 | 0.029467 |
| cg14265823 | 4.333192 | 1.232604 | 15.23324 | 0.022254 |
| cg06947913 | 4.331541 | 1.675541 | 11.19773 | 0.002486 |
| cg21169914 | 4.331469 | 1.357271 | 13.82305 | 0.01329  |
| cg02119363 | 4.329902 | 1.265017 | 14.8204  | 0.019574 |
| cg18375860 | 4.32514  | 1.314841 | 14.22745 | 0.01593  |
| cg18646365 | 4.323913 | 1.267601 | 14.74929 | 0.019349 |
| cg17537177 | 4.323458 | 1.279614 | 14.60775 | 0.018429 |
| cg16580499 | 4.32111  | 1.702387 | 10.96812 | 0.002074 |
| cg13161658 | 4.318083 | 1.151798 | 16.18847 | 0.03004  |
| cg00891278 | 4.316553 | 1.159505 | 16.06947 | 0.029211 |
| cg24809973 | 4.31533  | 1.181502 | 15.76136 | 0.026945 |
| cg05589845 | 4.313992 | 1.173262 | 15.86221 | 0.027772 |
| cg08260406 | 4.31381  | 1.437436 | 12.94594 | 0.009131 |
| cg07175883 | 4.313143 | 1.26379  | 14.72017 | 0.019608 |
| cg10851698 | 4.311968 | 1.188523 | 15.64384 | 0.02624  |
| cg10676084 | 4.31159  | 1.274758 | 14.583   | 0.018752 |
| cg10530883 | 4.310892 | 1.385348 | 13.41452 | 0.011645 |
| cg16065021 | 4.31075  | 1.357247 | 13.69136 | 0.013212 |
| cg11220663 | 4.310694 | 1.109325 | 16.75081 | 0.034878 |
| cg19384289 | 4.310163 | 1.339032 | 13.87383 | 0.014308 |
| cg02087954 | 4.310026 | 1.200734 | 15.4708  | 0.025058 |
| cg23383871 | 4.30805  | 1.270556 | 14.60722 | 0.019061 |
| cg21127068 | 4.307512 | 1.426902 | 13.00346 | 0.00958  |
| cg22290744 | 4.30693  | 1.445593 | 12.83186 | 0.008752 |
| cg16590237 | 4.301836 | 1.262471 | 14.65839 | 0.01967  |
| cg26608174 | 4.3018   | 1.401369 | 13.20529 | 0.010783 |
| cg17003293 | 4.298687 | 1.485054 | 12.44313 | 0.007162 |
| cg00043819 | 4.298124 | 1.192681 | 15.48936 | 0.02579  |
| cg22488797 | 4.295955 | 1.371219 | 13.45899 | 0.012356 |
| cg06518628 | 4.295869 | 1.338824 | 13.78411 | 0.014266 |
| cg04024095 | 4.295253 | 1.186937 | 15.54353 | 0.026342 |
| cg04612444 | 4.291833 | 1.52424  | 12.0846  | 0.005816 |
| cg24676817 | 4.289828 | 1.922652 | 9.571479 | 0.000376 |
| cg25567594 | 4.288633 | 1.714145 | 10.72977 | 0.00186  |
| cg11220245 | 4.287909 | 1.080815 | 17.01138 | 0.038406 |
| cg12880658 | 4.286934 | 1.367155 | 13.44237 | 0.01255  |
| cg09417809 | 4.282578 | 1.203792 | 15.23559 | 0.024678 |
| cg14930075 | 4.280537 | 1.441852 | 12.70796 | 0.008817 |
| cg00630958 | 4.277788 | 1.222796 | 14.96526 | 0.02292  |
| cg08862035 | 4.274695 | 1.532614 | 11.92278 | 0.005506 |
| cg01190024 | 4.27443  | 1.484635 | 12.30657 | 0.007094 |
| cg03748376 | 4.273164 | 1.633691 | 11.1771  | 0.003071 |
| cg01447112 | 4.270967 | 1.407884 | 12.95643 | 0.010343 |
| cg24407243 | 4.270463 | 1.105782 | 16.49227 | 0.03522  |
| cg02362103 | 4.268485 | 1.506701 | 12.09262 | 0.006305 |
| cg17076890 | 4.265612 | 1.109291 | 16.40276 | 0.034781 |
| cg05640128 | 4.264854 | 1.343508 | 13.53842 | 0.013855 |
| cg25645064 | 4.262942 | 1.466606 | 12.39097 | 0.007736 |
| cg24845274 | 4.260571 | 1.060684 | 17.11392 | 0.041052 |
| cg12285988 | 4.260211 | 1.371644 | 13.23186 | 0.012194 |
| cg23877720 | 4.259944 | 1.231451 | 14.73638 | 0.022094 |

|            |          |          |          |          |
|------------|----------|----------|----------|----------|
| cg23596233 | 4.258989 | 1.568919 | 11.56145 | 0.004456 |
| cg13400168 | 4.257765 | 1.132799 | 16.00334 | 0.031989 |
| cg18081940 | 4.25706  | 1.245123 | 14.55484 | 0.020916 |
| cg09168808 | 4.254331 | 1.248959 | 14.49154 | 0.020587 |
| cg13586599 | 4.252563 | 1.325119 | 13.6473  | 0.014968 |
| cg00472801 | 4.250731 | 1.200814 | 15.04705 | 0.024851 |
| cg17214381 | 4.25045  | 1.749621 | 10.32585 | 0.001397 |
| cg26984343 | 4.243145 | 1.176395 | 15.30462 | 0.027233 |
| cg23618344 | 4.242819 | 1.349752 | 13.3369  | 0.01339  |
| cg15092343 | 4.241538 | 1.726275 | 10.42165 | 0.001631 |
| cg10732215 | 4.241192 | 1.739484 | 10.34083 | 0.001486 |
| cg20750832 | 4.238743 | 1.422888 | 12.62709 | 0.009508 |
| cg12393318 | 4.23824  | 1.417554 | 12.6716  | 0.009755 |
| cg13791254 | 4.238185 | 1.460249 | 12.30079 | 0.007898 |
| cg00963169 | 4.235384 | 1.481731 | 12.10643 | 0.007065 |
| cg16851417 | 4.234726 | 1.394834 | 12.85666 | 0.010857 |
| cg17525406 | 4.233763 | 1.538845 | 11.64818 | 0.005195 |
| cg26118906 | 4.227783 | 1.21576  | 14.70204 | 0.023378 |
| cg11213369 | 4.226812 | 1.451141 | 12.31165 | 0.008227 |
| cg25746778 | 4.226703 | 1.592126 | 11.22086 | 0.003809 |
| cg07857243 | 4.225843 | 1.53196  | 11.6568  | 0.005371 |
| cg14458834 | 4.219452 | 1.776374 | 10.02254 | 0.001108 |
| cg27353143 | 4.217351 | 1.332851 | 13.34436 | 0.014331 |
| cg26429655 | 4.217166 | 1.394556 | 12.7528  | 0.010803 |
| cg26078977 | 4.214437 | 1.303213 | 13.62899 | 0.016296 |
| cg24509810 | 4.211701 | 1.212815 | 14.62583 | 0.023591 |
| cg12600018 | 4.21022  | 1.10806  | 15.99728 | 0.034805 |
| cg22795586 | 4.209523 | 1.436089 | 12.33912 | 0.008804 |
| cg25164624 | 4.208751 | 1.759001 | 10.07025 | 0.001243 |
| cg15343119 | 4.207606 | 1.405954 | 12.59213 | 0.010194 |
| cg14508508 | 4.206542 | 1.276666 | 13.86031 | 0.018204 |
| cg04475027 | 4.205029 | 1.589343 | 11.12552 | 0.003812 |
| cg08875705 | 4.200844 | 1.739554 | 10.14461 | 0.001419 |
| cg08790440 | 4.200665 | 1.243429 | 14.19107 | 0.020847 |
| cg16945186 | 4.200606 | 1.33946  | 13.17329 | 0.013849 |
| cg02473540 | 4.197417 | 1.232391 | 14.29604 | 0.021782 |
| cg17891759 | 4.19737  | 1.094773 | 16.09275 | 0.036437 |
| cg09336320 | 4.197106 | 1.43289  | 12.29382 | 0.008898 |
| cg23205387 | 4.193302 | 1.422646 | 12.35991 | 0.009346 |
| cg04145134 | 4.192984 | 1.222879 | 14.37682 | 0.022607 |
| cg19827780 | 4.191584 | 1.145529 | 15.33735 | 0.030369 |
| cg19098710 | 4.190108 | 1.436702 | 12.22036 | 0.008704 |
| cg01535698 | 4.189091 | 1.380454 | 12.71212 | 0.011432 |
| cg07035165 | 4.188956 | 1.244249 | 14.10277 | 0.020734 |
| cg12433277 | 4.185649 | 1.227348 | 14.27441 | 0.022182 |
| cg14835443 | 4.185085 | 1.103909 | 15.86629 | 0.035261 |
| cg12166610 | 4.183803 | 1.294455 | 13.52246 | 0.016795 |
| cg19459876 | 4.182297 | 1.160485 | 15.07267 | 0.028705 |
| cg00945238 | 4.181309 | 1.275162 | 13.71069 | 0.018219 |
| cg11260046 | 4.17983  | 1.450763 | 12.04261 | 0.008069 |
| cg00956199 | 4.17951  | 1.429743 | 12.21779 | 0.008971 |
| cg06273376 | 4.177699 | 1.520317 | 11.47995 | 0.005567 |
| cg00480389 | 4.177235 | 1.26498  | 13.79412 | 0.018995 |
| cg05863502 | 4.177198 | 1.35523  | 12.87529 | 0.012802 |

|            |          |          |          |          |
|------------|----------|----------|----------|----------|
| cg13962186 | 4.176919 | 1.205943 | 14.46723 | 0.024108 |
| cg03340466 | 4.17587  | 1.359345 | 12.82815 | 0.012557 |
| cg02167020 | 4.173982 | 1.053821 | 16.53233 | 0.04189  |
| cg24881420 | 4.17377  | 1.175244 | 14.82275 | 0.027127 |
| cg07103129 | 4.173497 | 1.298265 | 13.41643 | 0.016481 |
| cg07198552 | 4.173184 | 1.3468   | 12.93099 | 0.013289 |
| cg07850418 | 4.171855 | 1.111994 | 15.6515  | 0.034233 |
| cg23690166 | 4.170224 | 1.693995 | 10.26613 | 0.001892 |
| cg07664198 | 4.170196 | 1.313822 | 13.2366  | 0.015388 |
| cg14626309 | 4.169589 | 1.351638 | 12.86252 | 0.012984 |
| cg07498624 | 4.166748 | 1.196598 | 14.50929 | 0.024967 |
| cg03287574 | 4.164335 | 1.089621 | 15.91534 | 0.03703  |
| cg17862113 | 4.159822 | 1.050358 | 16.47449 | 0.042364 |
| cg05380019 | 4.157944 | 1.298364 | 13.31561 | 0.016411 |
| cg14380586 | 4.157241 | 1.188253 | 14.54458 | 0.025754 |
| cg08445263 | 4.155834 | 1.376092 | 12.55073 | 0.011534 |
| cg04897683 | 4.155141 | 1.180993 | 14.61922 | 0.026477 |
| cg19329160 | 4.152383 | 1.177883 | 14.63837 | 0.026785 |
| cg07463541 | 4.151214 | 1.121423 | 15.36671 | 0.033042 |
| cg15843567 | 4.150212 | 1.651833 | 10.42736 | 0.002464 |
| cg05314394 | 4.149424 | 1.355426 | 12.70281 | 0.012678 |
| cg25761626 | 4.148315 | 1.028271 | 16.73539 | 0.045593 |
| cg03306374 | 4.146529 | 1.500529 | 11.45842 | 0.006098 |
| cg04525757 | 4.146183 | 1.28946  | 13.3318  | 0.017006 |
| cg08066943 | 4.145733 | 1.223865 | 14.0433  | 0.022343 |
| cg10981651 | 4.14467  | 1.215179 | 14.13643 | 0.023129 |
| cg06757662 | 4.14465  | 1.376999 | 12.47504 | 0.011439 |
| cg18521914 | 4.143459 | 1.083248 | 15.84886 | 0.037821 |
| cg08079580 | 4.14255  | 1.267374 | 13.54037 | 0.018669 |
| cg12122146 | 4.14128  | 1.650763 | 10.38926 | 0.002461 |
| cg01944655 | 4.140513 | 1.229942 | 13.93874 | 0.021782 |
| cg20585038 | 4.139014 | 1.184276 | 14.46574 | 0.02609  |
| cg00847277 | 4.138709 | 1.095118 | 15.64115 | 0.036268 |
| cg10333808 | 4.138119 | 1.485507 | 11.5274  | 0.006586 |
| cg16707405 | 4.137152 | 1.456922 | 11.74807 | 0.00766  |
| cg17312004 | 4.13673  | 1.499703 | 11.41062 | 0.006092 |
| cg26220673 | 4.134543 | 1.257629 | 13.5926  | 0.019415 |
| cg26295057 | 4.131789 | 1.779428 | 9.593915 | 0.000964 |
| cg14045872 | 4.131601 | 1.516048 | 11.25962 | 0.005547 |
| cg03694713 | 4.131512 | 1.325818 | 12.87461 | 0.014433 |
| cg10058779 | 4.130325 | 1.392373 | 12.25216 | 0.01057  |
| cg16827475 | 4.129846 | 1.440856 | 11.83715 | 0.008296 |
| cg05658491 | 4.128577 | 1.15424  | 14.76742 | 0.029216 |
| cg05295006 | 4.125026 | 1.383122 | 12.30248 | 0.011031 |
| cg05137358 | 4.12417  | 1.412418 | 12.04231 | 0.009555 |
| cg11502555 | 4.121852 | 1.467825 | 11.57472 | 0.007178 |
| cg03496122 | 4.120635 | 1.245851 | 13.62894 | 0.020333 |
| cg01614020 | 4.119114 | 1.407396 | 12.05567 | 0.009775 |
| cg12071328 | 4.119041 | 1.56409  | 10.84752 | 0.004165 |
| cg08453021 | 4.116107 | 1.240653 | 13.65598 | 0.020757 |
| cg10290276 | 4.113891 | 1.207193 | 14.01938 | 0.023761 |
| cg04188273 | 4.111991 | 1.393375 | 12.1349  | 0.010444 |
| cg25898550 | 4.109991 | 1.076056 | 15.69809 | 0.038718 |
| cg02519751 | 4.109953 | 1.415003 | 11.93758 | 0.009376 |



|            |          |          |          |          |
|------------|----------|----------|----------|----------|
| cg27420520 | 4.109317 | 1.257885 | 13.42451 | 0.019293 |
| cg02631462 | 4.105162 | 1.273492 | 13.23318 | 0.01804  |
| cg01083633 | 4.102754 | 1.251596 | 13.4489  | 0.019782 |
| cg24454144 | 4.101097 | 1.549598 | 10.85378 | 0.004483 |
| cg26385172 | 4.097889 | 1.442233 | 11.64354 | 0.008115 |
| cg03469054 | 4.095138 | 1.312131 | 12.78085 | 0.015192 |
| cg16896079 | 4.094851 | 1.516564 | 11.05644 | 0.005407 |
| cg12091642 | 4.094525 | 1.448556 | 11.57369 | 0.007839 |
| cg25684640 | 4.092638 | 1.347501 | 12.43018 | 0.012913 |
| cg15985191 | 4.091811 | 1.382032 | 12.11472 | 0.010953 |
| cg25081106 | 4.09045  | 1.708996 | 9.790418 | 0.001559 |
| cg23495279 | 4.086115 | 1.211734 | 13.77887 | 0.02323  |
| cg13231921 | 4.085645 | 1.3576   | 12.29559 | 0.012286 |
| cg14373923 | 4.084561 | 1.142973 | 14.5967  | 0.03034  |
| cg18143296 | 4.082402 | 1.310985 | 12.71258 | 0.015217 |
| cg02798576 | 4.081746 | 1.531249 | 10.88043 | 0.004928 |
| cg06577205 | 4.081714 | 1.371784 | 12.14505 | 0.011466 |
| cg11657203 | 4.081206 | 1.262896 | 13.18893 | 0.018775 |
| cg00505277 | 4.078718 | 1.297432 | 12.8222  | 0.016149 |
| cg27037551 | 4.077359 | 1.168349 | 14.22936 | 0.027528 |
| cg12754421 | 4.075482 | 1.489588 | 11.15043 | 0.00622  |
| cg27578811 | 4.074431 | 1.209079 | 13.73027 | 0.023435 |
| cg16023545 | 4.074185 | 1.205039 | 13.77464 | 0.023818 |
| cg20987924 | 4.072093 | 1.225199 | 13.53408 | 0.02194  |
| cg09551147 | 4.07189  | 1.18409  | 14.00256 | 0.025874 |
| cg20404387 | 4.070678 | 1.161128 | 14.27096 | 0.02828  |
| cg18236477 | 4.070102 | 1.363499 | 12.14942 | 0.011882 |
| cg25537434 | 4.06907  | 1.182049 | 14.00732 | 0.026072 |
| cg24073122 | 4.067628 | 1.393038 | 11.87735 | 0.01028  |
| cg11277087 | 4.06749  | 1.189632 | 13.90722 | 0.025299 |
| cg23619365 | 4.067402 | 1.33633  | 12.38    | 0.013493 |
| cg20337384 | 4.065704 | 1.55368  | 10.63922 | 0.004267 |
| cg04328762 | 4.065357 | 1.401819 | 11.78977 | 0.009831 |
| cg17714025 | 4.064532 | 1.116666 | 14.79442 | 0.03339  |
| cg10084644 | 4.062443 | 1.325095 | 12.45454 | 0.01419  |
| cg21854408 | 4.058864 | 1.120538 | 14.7022  | 0.032903 |
| cg01802258 | 4.058377 | 1.420032 | 11.59862 | 0.008936 |
| cg25958283 | 4.057738 | 1.645228 | 10.00787 | 0.002359 |
| cg20475322 | 4.057248 | 1.646631 | 9.996936 | 0.002335 |
| cg10652393 | 4.05209  | 1.340762 | 12.24634 | 0.013152 |
| cg07104209 | 4.052014 | 1.449962 | 11.32362 | 0.007618 |
| cg09229912 | 4.048673 | 1.213348 | 13.50952 | 0.022936 |
| cg05031521 | 4.048019 | 1.245625 | 13.15521 | 0.02006  |
| cg22687748 | 4.046642 | 1.173663 | 13.95231 | 0.026861 |
| cg08553284 | 4.043738 | 1.308608 | 12.49557 | 0.015215 |
| cg00090261 | 4.042759 | 1.348297 | 12.12188 | 0.012654 |
| cg06419761 | 4.041644 | 1.414934 | 11.54463 | 0.009104 |
| cg19509393 | 4.04046  | 1.14262  | 14.28762 | 0.030246 |
| cg16242629 | 4.039004 | 1.240089 | 13.15515 | 0.020496 |
| cg11994674 | 4.038947 | 1.281771 | 12.72699 | 0.017131 |
| cg19792599 | 4.038497 | 1.076287 | 15.15344 | 0.038553 |
| cg04200224 | 4.037143 | 1.24786  | 13.06118 | 0.019827 |
| cg10108296 | 4.036255 | 1.037305 | 15.70547 | 0.044136 |
| cg07212778 | 4.035027 | 1.206349 | 13.49647 | 0.023544 |

|            |          |          |          |          |
|------------|----------|----------|----------|----------|
| cg09554951 | 4.03266  | 1.340905 | 12.12789 | 0.01306  |
| cg05627639 | 4.030036 | 1.478897 | 10.98196 | 0.00643  |
| cg19760241 | 4.028561 | 1.371477 | 11.83345 | 0.011259 |
| cg02317400 | 4.028276 | 1.235075 | 13.13848 | 0.020888 |
| cg17774559 | 4.027761 | 1.446196 | 11.21761 | 0.007678 |
| cg09799983 | 4.02708  | 1.637929 | 9.901147 | 0.002405 |
| cg07315858 | 4.026994 | 1.12264  | 14.44512 | 0.03256  |
| cg02034102 | 4.026863 | 1.101517 | 14.72117 | 0.035191 |
| cg01718447 | 4.022102 | 1.552358 | 10.42112 | 0.004166 |
| cg24483247 | 4.021424 | 1.411732 | 11.45533 | 0.009172 |
| cg09524455 | 4.019146 | 1.492476 | 10.82331 | 0.005919 |
| cg03638905 | 4.015734 | 1.017577 | 15.84757 | 0.047162 |
| cg27200446 | 4.015359 | 1.552845 | 10.38295 | 0.004132 |
| cg04550052 | 4.014519 | 1.49606  | 10.77254 | 0.005783 |
| cg20732478 | 4.014484 | 1.017788 | 15.83442 | 0.047128 |
| cg23244488 | 4.014437 | 1.416027 | 11.38093 | 0.008943 |
| cg27072996 | 4.014411 | 1.538282 | 10.4763  | 0.004512 |
| cg17816908 | 4.014201 | 1.286393 | 12.52635 | 0.016679 |
| cg26381364 | 4.012584 | 1.44312  | 11.15696 | 0.007745 |
| cg00800512 | 4.011668 | 1.059849 | 15.18469 | 0.0408   |
| cg12921750 | 4.005569 | 1.093056 | 14.67865 | 0.036238 |
| cg11563844 | 4.004078 | 1.11291  | 14.40605 | 0.033693 |
| cg23266743 | 4.003165 | 1.240721 | 12.91615 | 0.020294 |
| cg01796166 | 4.002195 | 1.212458 | 13.21083 | 0.022837 |
| cg19947104 | 3.999638 | 1.3427   | 11.91413 | 0.012807 |
| cg13266435 | 3.997567 | 1.389129 | 11.50401 | 0.010187 |
| cg11071231 | 3.996215 | 1.442323 | 11.07223 | 0.007713 |
| cg20377305 | 3.99537  | 1.328356 | 12.01709 | 0.013688 |
| cg07533148 | 3.995    | 1.247269 | 12.79598 | 0.019701 |
| cg00842325 | 3.994294 | 1.424274 | 11.20176 | 0.008485 |
| cg27122536 | 3.993457 | 1.127478 | 14.14457 | 0.03188  |
| cg21836358 | 3.992728 | 1.311377 | 12.15659 | 0.014803 |
| cg15473084 | 3.989522 | 1.052373 | 15.12419 | 0.041847 |
| cg14060496 | 3.988119 | 1.1754   | 13.53165 | 0.026471 |
| cg26014036 | 3.985337 | 1.561273 | 10.17305 | 0.003831 |
| cg25976257 | 3.981602 | 1.219335 | 13.00148 | 0.022114 |
| cg25317585 | 3.981026 | 1.645976 | 9.628674 | 0.002171 |
| cg18110483 | 3.980923 | 1.42849  | 11.09406 | 0.008243 |
| cg20339230 | 3.980821 | 1.109333 | 14.2851  | 0.03408  |
| cg05941108 | 3.980376 | 1.255157 | 12.62264 | 0.018981 |
| cg07204550 | 3.980161 | 1.23114  | 12.86749 | 0.021038 |
| cg13924432 | 3.978945 | 1.181615 | 13.39861 | 0.02579  |
| cg23699196 | 3.978318 | 1.388577 | 11.39801 | 0.010134 |
| cg12799689 | 3.977239 | 1.578673 | 10.02008 | 0.003407 |
| cg03323696 | 3.976801 | 1.351614 | 11.70078 | 0.01217  |
| cg19937061 | 3.976129 | 1.217417 | 12.98619 | 0.022269 |
| cg18938204 | 3.974281 | 1.194259 | 13.2257  | 0.02449  |
| cg04922810 | 3.973938 | 1.136105 | 13.90028 | 0.030796 |
| cg19206040 | 3.973426 | 1.281056 | 12.3243  | 0.016902 |
| cg16404157 | 3.973271 | 1.314987 | 12.00535 | 0.014472 |
| cg06022179 | 3.972494 | 1.090054 | 14.477   | 0.036559 |
| cg20139706 | 3.972487 | 1.156465 | 13.64559 | 0.028463 |
| cg01159623 | 3.972214 | 1.245787 | 12.66547 | 0.019731 |
| cg03357798 | 3.970517 | 1.437893 | 10.96397 | 0.007796 |

|            |          |          |          |          |
|------------|----------|----------|----------|----------|
| cg23189410 | 3.970063 | 1.603489 | 9.829439 | 0.002875 |
| cg19793376 | 3.969258 | 1.280838 | 12.30055 | 0.0169   |
| cg25975712 | 3.96916  | 1.420552 | 11.09022 | 0.008549 |
| cg24129382 | 3.966332 | 1.50124  | 10.4792  | 0.005443 |
| cg15984718 | 3.963704 | 1.053622 | 14.91137 | 0.041627 |
| cg00637687 | 3.963393 | 1.140505 | 13.77328 | 0.030248 |
| cg06528306 | 3.961482 | 1.49914  | 10.46823 | 0.005493 |
| cg15174552 | 3.960527 | 1.32974  | 11.79612 | 0.013445 |
| cg06838985 | 3.958608 | 1.033554 | 15.16184 | 0.044629 |
| cg00247557 | 3.955504 | 1.207542 | 12.95691 | 0.023118 |
| cg00812438 | 3.95338  | 1.400874 | 11.15675 | 0.00941  |
| cg12573849 | 3.953271 | 1.078111 | 14.49605 | 0.038134 |
| cg12973118 | 3.952394 | 1.113966 | 14.02325 | 0.03342  |
| cg19502744 | 3.950984 | 1.113705 | 14.01652 | 0.033449 |
| cg13012916 | 3.948824 | 1.332281 | 11.70415 | 0.013231 |
| cg03970036 | 3.948513 | 1.651717 | 9.43912  | 0.002012 |
| cg13640145 | 3.948397 | 1.320927 | 11.80219 | 0.013965 |
| cg11002404 | 3.946707 | 1.233839 | 12.62442 | 0.020659 |
| cg18331515 | 3.946113 | 1.288876 | 12.0817  | 0.016196 |
| cg27615388 | 3.945183 | 1.247024 | 12.4813  | 0.01951  |
| cg12382153 | 3.944541 | 1.496199 | 10.39928 | 0.005527 |
| cg10943359 | 3.941837 | 1.028769 | 15.10356 | 0.045355 |
| cg27100227 | 3.938429 | 1.569324 | 9.884017 | 0.003502 |
| cg17029062 | 3.938329 | 1.22428  | 12.66902 | 0.021482 |
| cg13677149 | 3.935721 | 1.382436 | 11.20479 | 0.010269 |
| cg23244289 | 3.935569 | 1.298931 | 11.92419 | 0.015419 |
| cg04812556 | 3.934117 | 1.437556 | 10.76638 | 0.007663 |
| cg24507762 | 3.933083 | 1.114099 | 13.8849  | 0.03335  |
| cg13601435 | 3.931595 | 1.704045 | 9.071028 | 0.00133  |
| cg09477453 | 3.931065 | 1.095433 | 14.107   | 0.035748 |
| cg24837370 | 3.928515 | 1.484641 | 10.39526 | 0.005853 |
| cg24708471 | 3.928144 | 1.571663 | 9.817825 | 0.003419 |
| cg03002848 | 3.927154 | 1.162235 | 13.26972 | 0.027667 |
| cg25825488 | 3.926498 | 1.372034 | 11.23688 | 0.010786 |
| cg13300273 | 3.922267 | 1.373346 | 11.20197 | 0.010696 |
| cg00860808 | 3.921641 | 1.381634 | 11.13122 | 0.01025  |
| cg23353952 | 3.92093  | 1.211376 | 12.6911  | 0.022611 |
| cg14564076 | 3.920514 | 1.384969 | 11.09803 | 0.01007  |
| cg21370856 | 3.918414 | 1.135797 | 13.51823 | 0.030657 |
| cg07116997 | 3.918292 | 1.08729  | 14.12045 | 0.036806 |
| cg16081281 | 3.918108 | 1.151957 | 13.32651 | 0.028782 |
| cg21885046 | 3.917742 | 1.359087 | 11.29339 | 0.011473 |
| cg24060451 | 3.917292 | 1.179277 | 13.01236 | 0.025801 |
| cg11142389 | 3.915841 | 1.463275 | 10.4791  | 0.006569 |
| cg09578028 | 3.91574  | 1.522773 | 10.06915 | 0.004616 |
| cg21609106 | 3.914457 | 1.44625  | 10.59497 | 0.007226 |
| cg20872937 | 3.913947 | 1.574106 | 9.731858 | 0.003323 |
| cg14416371 | 3.912171 | 1.693771 | 9.036098 | 0.001405 |
| cg09338032 | 3.911663 | 1.120405 | 13.65677 | 0.032501 |
| cg03112087 | 3.908233 | 1.367363 | 11.17062 | 0.010963 |
| cg04434339 | 3.907727 | 1.377439 | 11.08603 | 0.010411 |
| cg12118269 | 3.904664 | 1.459359 | 10.44732 | 0.006673 |
| cg20066716 | 3.904086 | 1.274907 | 11.9553  | 0.017065 |
| cg23279117 | 3.90134  | 1.029842 | 14.77941 | 0.045152 |

|            |          |          |          |          |
|------------|----------|----------|----------|----------|
| cg03997176 | 3.900326 | 1.040203 | 14.62459 | 0.043548 |
| cg09839170 | 3.896961 | 1.263677 | 12.01755 | 0.01792  |
| cg23243867 | 3.896842 | 1.356483 | 11.19467 | 0.011529 |
| cg27199820 | 3.893126 | 1.3963   | 10.85471 | 0.009375 |
| cg23756251 | 3.892664 | 1.11023  | 13.64837 | 0.033726 |
| cg22459630 | 3.892539 | 1.412071 | 10.73024 | 0.008616 |
| cg26485937 | 3.890957 | 1.112473 | 13.60891 | 0.033436 |
| cg23292160 | 3.888276 | 1.058429 | 14.28409 | 0.040806 |
| cg18813020 | 3.887267 | 1.233872 | 12.24669 | 0.0204   |
| cg27618240 | 3.887256 | 1.348564 | 11.20507 | 0.011951 |
| cg21883598 | 3.887226 | 1.126699 | 13.41132 | 0.031653 |
| cg14271531 | 3.886771 | 1.308466 | 11.54557 | 0.014527 |
| cg10721149 | 3.886234 | 1.248252 | 12.09917 | 0.019148 |
| cg01874877 | 3.884892 | 1.038753 | 14.52933 | 0.043752 |
| cg24830738 | 3.884453 | 1.04812  | 14.39623 | 0.042328 |
| cg04227961 | 3.882844 | 1.536962 | 9.809271 | 0.004118 |
| cg23689712 | 3.882178 | 1.126116 | 13.38344 | 0.031709 |
| cg09090724 | 3.881734 | 1.190241 | 12.65951 | 0.024531 |
| cg06062984 | 3.88042  | 1.234477 | 12.1976  | 0.020317 |
| cg23715830 | 3.879855 | 1.536067 | 9.799884 | 0.004132 |
| cg26735846 | 3.879252 | 1.485019 | 10.1336  | 0.005656 |
| cg10303487 | 3.878761 | 1.22009  | 12.33088 | 0.021615 |
| cg14523847 | 3.878312 | 1.578989 | 9.525906 | 0.003114 |
| cg15382538 | 3.876702 | 1.278954 | 11.75087 | 0.016628 |
| cg13544006 | 3.875407 | 1.464226 | 10.25715 | 0.006375 |
| cg08621473 | 3.873545 | 1.205054 | 12.45118 | 0.023023 |
| cg14780632 | 3.871974 | 1.622628 | 9.239447 | 0.002282 |
| cg00663077 | 3.871927 | 1.55936  | 9.614085 | 0.00353  |
| cg19099050 | 3.871454 | 1.47452  | 10.16477 | 0.005988 |
| cg01130127 | 3.869611 | 1.245382 | 12.02353 | 0.019318 |
| cg22793136 | 3.865709 | 1.342934 | 11.12765 | 0.012191 |
| cg16142306 | 3.865671 | 1.266038 | 11.8033  | 0.017589 |
| cg11595545 | 3.863977 | 1.488015 | 10.03372 | 0.005498 |
| cg24767540 | 3.862568 | 1.222003 | 12.209   | 0.021368 |
| cg27606499 | 3.860867 | 1.391284 | 10.71406 | 0.009484 |
| cg07681938 | 3.859681 | 1.158776 | 12.85593 | 0.027806 |
| cg08431563 | 3.858406 | 1.490254 | 9.989769 | 0.005404 |
| cg14510359 | 3.858204 | 1.424976 | 10.4463  | 0.007887 |
| cg16190732 | 3.857118 | 1.443852 | 10.30394 | 0.007089 |
| cg20507276 | 3.855903 | 1.309657 | 11.35258 | 0.014301 |
| cg01307939 | 3.855797 | 1.108656 | 13.41008 | 0.033824 |
| cg11700800 | 3.853159 | 1.106235 | 13.42105 | 0.03413  |
| cg15186181 | 3.853035 | 1.448007 | 10.25263 | 0.006906 |
| cg19134945 | 3.849593 | 1.418331 | 10.44846 | 0.008146 |
| cg12175729 | 3.848518 | 1.3584   | 10.90334 | 0.011198 |
| cg13933262 | 3.848211 | 1.61347  | 9.178184 | 0.002376 |
| cg00174428 | 3.844708 | 1.406882 | 10.50677 | 0.008652 |
| cg00339682 | 3.844487 | 1.240008 | 11.91934 | 0.01967  |
| cg22345692 | 3.842733 | 1.014987 | 14.54856 | 0.047494 |
| cg27058257 | 3.842042 | 1.35318  | 10.90859 | 0.01147  |
| cg02745211 | 3.84014  | 1.468933 | 10.03904 | 0.006065 |
| cg05379302 | 3.839843 | 1.26081  | 11.69438 | 0.017893 |
| cg01610632 | 3.839708 | 1.341077 | 10.99367 | 0.012184 |
| cg11548303 | 3.839532 | 1.193226 | 12.35475 | 0.024056 |

|            |          |          |          |          |
|------------|----------|----------|----------|----------|
| cg02765859 | 3.839085 | 1.195119 | 12.33231 | 0.023863 |
| cg16332256 | 3.838484 | 1.363437 | 10.80648 | 0.010866 |
| cg21956337 | 3.836182 | 1.427011 | 10.31267 | 0.007705 |
| cg03775422 | 3.834711 | 1.420655 | 10.35086 | 0.007978 |
| cg13172637 | 3.834104 | 1.326664 | 11.08069 | 0.013065 |
| cg14381623 | 3.833632 | 1.036361 | 14.1811  | 0.044064 |
| cg21545862 | 3.831729 | 1.283524 | 11.43894 | 0.016072 |
| cg05842855 | 3.827994 | 1.249611 | 11.72648 | 0.018769 |
| cg13777292 | 3.826481 | 1.402346 | 10.44105 | 0.008788 |
| cg11615755 | 3.825263 | 1.141945 | 12.81378 | 0.029618 |
| cg15520279 | 3.824225 | 1.103527 | 13.25268 | 0.034403 |
| cg23572908 | 3.82306  | 1.559172 | 9.374066 | 0.003383 |
| cg12196573 | 3.820358 | 1.054554 | 13.8401  | 0.041266 |
| cg14750948 | 3.817258 | 1.255414 | 11.60689 | 0.018233 |
| cg06952671 | 3.816039 | 1.537334 | 9.472344 | 0.003889 |
| cg22837767 | 3.815952 | 1.4671   | 9.925355 | 0.006035 |
| cg11381539 | 3.8154   | 1.229642 | 11.83863 | 0.020461 |
| cg25260137 | 3.814329 | 1.088822 | 13.36224 | 0.036349 |
| cg04774711 | 3.812986 | 1.184631 | 12.2729  | 0.02483  |
| cg12768681 | 3.812203 | 1.281422 | 11.34122 | 0.016139 |
| cg00741624 | 3.811953 | 1.282279 | 11.33216 | 0.016073 |
| cg21154627 | 3.811874 | 1.193087 | 12.17881 | 0.023955 |
| cg09147777 | 3.808439 | 1.348105 | 10.75896 | 0.011613 |
| cg24430140 | 3.807636 | 1.179021 | 12.29672 | 0.025398 |
| cg06460717 | 3.807384 | 1.098825 | 13.19243 | 0.034979 |
| cg19949955 | 3.805389 | 1.129506 | 12.82064 | 0.031047 |
| cg25953239 | 3.805319 | 1.295762 | 11.17524 | 0.015043 |
| cg05983315 | 3.804948 | 1.388332 | 10.42808 | 0.009382 |
| cg12307484 | 3.803386 | 1.333769 | 10.84577 | 0.012467 |
| cg02630214 | 3.802619 | 1.308207 | 11.05323 | 0.01415  |
| cg10445315 | 3.80259  | 1.369332 | 10.55967 | 0.010373 |
| cg17877704 | 3.802404 | 1.11247  | 12.99655 | 0.033177 |
| cg22534145 | 3.801791 | 1.174745 | 12.30362 | 0.025831 |
| cg15928093 | 3.801677 | 1.174074 | 12.30991 | 0.025903 |
| cg18425434 | 3.801061 | 1.221295 | 11.83012 | 0.021163 |
| cg22849427 | 3.798422 | 1.214457 | 11.88022 | 0.021795 |
| cg07073391 | 3.794569 | 1.389196 | 10.36481 | 0.009291 |
| cg04945331 | 3.794475 | 1.506791 | 9.555436 | 0.004655 |
| cg05571970 | 3.794407 | 1.050845 | 13.70089 | 0.041783 |
| cg00745725 | 3.79313  | 1.310406 | 10.97968 | 0.013953 |
| cg11178863 | 3.792779 | 1.374228 | 10.46782 | 0.010062 |
| cg23302682 | 3.792537 | 1.256585 | 11.44638 | 0.01802  |
| cg17336584 | 3.791086 | 1.174358 | 12.23846 | 0.02583  |
| cg07703401 | 3.790666 | 1.125497 | 12.76694 | 0.031493 |
| cg21424940 | 3.790648 | 1.088857 | 13.19642 | 0.036285 |
| cg14970666 | 3.789776 | 1.153793 | 12.44799 | 0.028111 |
| cg17657179 | 3.78815  | 1.248862 | 11.49052 | 0.018648 |
| cg17316316 | 3.785016 | 1.169324 | 12.25182 | 0.026353 |
| cg20463526 | 3.784588 | 1.535427 | 9.328417 | 0.003833 |
| cg05227131 | 3.782073 | 1.34719  | 10.61772 | 0.011543 |
| cg08046044 | 3.781862 | 1.102696 | 12.97046 | 0.034393 |
| cg12478381 | 3.781339 | 1.286709 | 11.11248 | 0.015593 |
| cg08426444 | 3.780077 | 1.223219 | 11.68146 | 0.020889 |
| cg01800521 | 3.779789 | 1.247613 | 11.45131 | 0.018715 |

|            |          |          |          |          |
|------------|----------|----------|----------|----------|
| cg04127342 | 3.779424 | 1.232303 | 11.59134 | 0.020057 |
| cg02483484 | 3.779416 | 1.284818 | 11.11752 | 0.015726 |
| cg24856726 | 3.778105 | 1.160899 | 12.29571 | 0.02726  |
| cg12612118 | 3.777941 | 1.197096 | 11.92289 | 0.023405 |
| cg13721404 | 3.775817 | 1.215676 | 11.72746 | 0.021578 |
| cg04021697 | 3.774394 | 1.567274 | 9.089698 | 0.003057 |
| cg24637364 | 3.773959 | 1.262382 | 11.28245 | 0.017456 |
| cg24838010 | 3.773595 | 1.004135 | 14.18137 | 0.04929  |
| cg06151165 | 3.773549 | 1.474156 | 9.659539 | 0.005619 |
| cg13051450 | 3.772579 | 1.260149 | 11.29418 | 0.017631 |
| cg13706544 | 3.772461 | 1.067099 | 13.33659 | 0.039326 |
| cg02250846 | 3.770624 | 1.311192 | 10.84327 | 0.01379  |
| cg20495645 | 3.768933 | 1.397687 | 10.16312 | 0.008754 |
| cg09797577 | 3.768137 | 1.230141 | 11.54247 | 0.0202   |
| cg13491462 | 3.768126 | 1.085724 | 13.0777  | 0.036662 |
| cg18451814 | 3.767974 | 1.343261 | 10.56953 | 0.011711 |
| cg17074396 | 3.765381 | 1.045022 | 13.56727 | 0.042632 |
| cg06094615 | 3.764726 | 1.29464  | 10.94757 | 0.014928 |
| cg04028570 | 3.764158 | 1.27249  | 11.13477 | 0.0166   |
| cg02119792 | 3.757439 | 1.497196 | 9.429859 | 0.004808 |
| cg05442408 | 3.757281 | 1.023171 | 13.79746 | 0.0461   |
| cg13628577 | 3.752212 | 1.470392 | 9.575059 | 0.005665 |
| cg00384539 | 3.752055 | 1.257499 | 11.19517 | 0.017751 |
| cg03506640 | 3.750444 | 1.266716 | 11.10417 | 0.016992 |
| cg26422458 | 3.750277 | 1.345521 | 10.45289 | 0.01149  |
| cg11021995 | 3.749443 | 1.121219 | 12.53842 | 0.031895 |
| cg25517810 | 3.749336 | 1.309086 | 10.73843 | 0.013831 |
| cg01024444 | 3.749132 | 1.462049 | 9.613897 | 0.00595  |
| cg02760031 | 3.744718 | 1.089232 | 12.87413 | 0.036116 |
| cg16113681 | 3.743211 | 1.272336 | 11.01253 | 0.01651  |
| cg22633280 | 3.742659 | 1.133261 | 12.36034 | 0.030373 |
| cg22769941 | 3.742458 | 1.31306  | 10.66668 | 0.013525 |
| cg13344169 | 3.741853 | 1.099733 | 12.7317  | 0.034675 |
| cg06444755 | 3.741373 | 1.076821 | 12.99925 | 0.037853 |
| cg00252282 | 3.741046 | 1.357522 | 10.30954 | 0.010743 |
| cg05534710 | 3.740374 | 1.191541 | 11.74143 | 0.023807 |
| cg20585530 | 3.739197 | 1.176119 | 11.8879  | 0.025427 |
| cg26186727 | 3.738776 | 1.163852 | 12.0105  | 0.026774 |
| cg00966398 | 3.738562 | 1.029388 | 13.57782 | 0.045072 |
| cg19841369 | 3.73842  | 1.396665 | 10.00654 | 0.008664 |
| cg15014975 | 3.738027 | 1.214346 | 11.50648 | 0.021533 |
| cg22346124 | 3.737589 | 1.386675 | 10.07415 | 0.009156 |
| cg01354961 | 3.737146 | 1.283326 | 10.88286 | 0.015632 |
| cg06704093 | 3.736914 | 1.109787 | 12.58307 | 0.033327 |
| cg18652900 | 3.736854 | 1.433205 | 9.74325  | 0.007017 |
| cg08551532 | 3.735736 | 1.138419 | 12.25886 | 0.029721 |
| cg20279673 | 3.73459  | 1.213756 | 11.49091 | 0.021574 |
| cg06535308 | 3.734385 | 1.026616 | 13.58408 | 0.045518 |
| cg17285663 | 3.731948 | 1.321881 | 10.53608 | 0.012885 |
| cg25809841 | 3.73147  | 1.123608 | 12.39211 | 0.031533 |
| cg03391684 | 3.730963 | 1.1595   | 12.00525 | 0.027234 |
| cg24198558 | 3.728563 | 1.33702  | 10.39788 | 0.011902 |
| cg11120927 | 3.72744  | 1.454916 | 9.549564 | 0.006123 |
| cg01610231 | 3.725244 | 1.132285 | 12.25614 | 0.030431 |

|            |          |          |          |          |
|------------|----------|----------|----------|----------|
| cg24066316 | 3.723155 | 1.113935 | 12.44407 | 0.032743 |
| cg09403666 | 3.722638 | 1.298464 | 10.67263 | 0.014445 |
| cg14730445 | 3.722148 | 1.160768 | 11.93553 | 0.027055 |
| cg20023231 | 3.721767 | 1.252439 | 11.05966 | 0.018028 |
| cg13208922 | 3.72054  | 1.204587 | 11.49143 | 0.022403 |
| cg12161228 | 3.720183 | 1.314785 | 10.52626 | 0.013299 |
| cg19411025 | 3.716411 | 1.106021 | 12.48774 | 0.03376  |
| cg26667205 | 3.716248 | 1.320678 | 10.45713 | 0.012886 |
| cg04671611 | 3.715887 | 1.240295 | 11.13269 | 0.019046 |
| cg10224098 | 3.714411 | 1.426677 | 9.670623 | 0.007192 |
| cg11789740 | 3.705798 | 1.080185 | 12.7135  | 0.037288 |
| cg19443075 | 3.705095 | 1.073922 | 12.78279 | 0.038188 |
| cg03281661 | 3.7045   | 1.111022 | 12.35198 | 0.033064 |
| cg21548155 | 3.704249 | 1.28582  | 10.67137 | 0.015281 |
| cg23638252 | 3.703645 | 1.084342 | 12.65006 | 0.036693 |
| cg06831576 | 3.702866 | 1.220461 | 11.23446 | 0.020789 |
| cg24643282 | 3.702111 | 1.022657 | 13.40197 | 0.046142 |
| cg04245645 | 3.701357 | 1.172522 | 11.68425 | 0.02566  |
| cg01464835 | 3.700323 | 1.156803 | 11.83641 | 0.02742  |
| cg17305436 | 3.700049 | 1.346348 | 10.16852 | 0.011196 |
| cg09252495 | 3.699771 | 1.387749 | 9.863677 | 0.008925 |
| cg20129213 | 3.699401 | 1.607549 | 8.51331  | 0.002096 |
| cg14007067 | 3.697932 | 1.145698 | 11.9357  | 0.028708 |
| cg14638883 | 3.697618 | 1.270077 | 10.765   | 0.016464 |
| cg23130254 | 3.695522 | 1.015464 | 13.4489  | 0.04734  |
| cg00745389 | 3.695109 | 1.166607 | 11.70388 | 0.026288 |
| cg06399302 | 3.694186 | 1.35503  | 10.07137 | 0.010658 |
| cg18921771 | 3.691973 | 1.525653 | 8.934313 | 0.00377  |
| cg00175709 | 3.689723 | 1.090521 | 12.484   | 0.03579  |
| cg16256390 | 3.689262 | 1.398708 | 9.730878 | 0.008338 |
| cg19656282 | 3.688258 | 1.288741 | 10.55545 | 0.014983 |
| cg18795809 | 3.686716 | 1.223447 | 11.10949 | 0.020433 |
| cg03949391 | 3.686653 | 1.074537 | 12.64862 | 0.038056 |
| cg05142982 | 3.686434 | 1.617465 | 8.401909 | 0.001909 |
| cg19497031 | 3.685393 | 1.34663  | 10.08601 | 0.011106 |
| cg16945312 | 3.684252 | 1.429557 | 9.495045 | 0.006938 |
| cg26872137 | 3.683473 | 1.119426 | 12.12048 | 0.031904 |
| cg23746497 | 3.682267 | 1.230669 | 11.01766 | 0.019746 |
| cg03506489 | 3.681344 | 1.053955 | 12.85851 | 0.041121 |
| cg08492619 | 3.679118 | 1.455066 | 9.302606 | 0.005916 |
| cg07687119 | 3.677812 | 1.142127 | 11.84308 | 0.029058 |
| cg19810598 | 3.677542 | 1.163044 | 11.62837 | 0.026615 |
| cg08217024 | 3.676716 | 1.52605  | 8.858317 | 0.003707 |
| cg16664405 | 3.675357 | 1.328121 | 10.17095 | 0.012198 |
| cg17384380 | 3.674418 | 1.127303 | 11.97668 | 0.030871 |
| cg11475550 | 3.672272 | 1.257442 | 10.72462 | 0.017364 |
| cg22978087 | 3.668347 | 1.110122 | 12.12189 | 0.033067 |
| cg09582952 | 3.665445 | 1.096475 | 12.25334 | 0.034898 |
| cg10617909 | 3.664007 | 1.34225  | 10.00182 | 0.011262 |
| cg23180938 | 3.663426 | 1.417172 | 9.470052 | 0.007373 |
| cg25645268 | 3.66335  | 1.302224 | 10.30555 | 0.013879 |
| cg01009664 | 3.661161 | 1.285155 | 10.42994 | 0.015113 |
| cg05099508 | 3.657908 | 1.261626 | 10.60559 | 0.016946 |
| cg06617456 | 3.656753 | 1.366511 | 9.785386 | 0.00983  |

|            |          |          |          |          |
|------------|----------|----------|----------|----------|
| cg01625087 | 3.656384 | 1.211301 | 11.03702 | 0.021446 |
| cg03217795 | 3.656016 | 1.328949 | 10.05791 | 0.012047 |
| cg06158650 | 3.655775 | 1.0946   | 12.20966 | 0.035129 |
| cg17985646 | 3.655642 | 1.165111 | 11.4699  | 0.02629  |
| cg18685561 | 3.651528 | 1.227726 | 10.86044 | 0.019865 |
| cg14985989 | 3.648048 | 1.541158 | 8.635231 | 0.003242 |
| cg16697214 | 3.647826 | 1.27655  | 10.4239  | 0.015703 |
| cg02232208 | 3.645157 | 1.251193 | 10.6196  | 0.017753 |
| cg11229185 | 3.64413  | 1.183824 | 11.21761 | 0.024188 |
| cg04167903 | 3.642691 | 1.092421 | 12.1466  | 0.035394 |
| cg01645753 | 3.642302 | 1.14922  | 11.5438  | 0.028072 |
| cg24129977 | 3.642282 | 1.269361 | 10.4511  | 0.016241 |
| cg21145524 | 3.642223 | 1.391268 | 9.535038 | 0.008477 |
| cg24801123 | 3.641922 | 1.01058  | 13.12474 | 0.048149 |
| cg12974388 | 3.640505 | 1.342026 | 9.875573 | 0.011157 |
| cg00257047 | 3.640137 | 1.114318 | 11.89121 | 0.032421 |
| cg18267049 | 3.639496 | 1.409565 | 9.397179 | 0.007602 |
| cg26170569 | 3.639226 | 1.232104 | 10.74907 | 0.019404 |
| cg09493505 | 3.63831  | 1.413852 | 9.36258  | 0.007404 |
| cg27019126 | 3.637836 | 1.210945 | 10.92853 | 0.021391 |
| cg13267931 | 3.637339 | 1.354898 | 9.764744 | 0.010384 |
| cg11073558 | 3.635825 | 1.09394  | 12.08405 | 0.035162 |
| cg13842237 | 3.634108 | 1.034398 | 12.76756 | 0.044145 |
| cg08812189 | 3.631879 | 1.192653 | 11.05983 | 0.023204 |
| cg00379720 | 3.631618 | 1.210807 | 10.89244 | 0.021375 |
| cg18877285 | 3.63086  | 1.041181 | 12.66172 | 0.043044 |
| cg09275869 | 3.628687 | 1.279118 | 10.2941  | 0.015406 |
| cg04267526 | 3.626878 | 1.015789 | 12.94978 | 0.047246 |
| cg03250019 | 3.625803 | 1.262541 | 10.41269 | 0.016707 |
| cg02091605 | 3.625496 | 1.029488 | 12.76772 | 0.044941 |
| cg09813525 | 3.625092 | 1.255467 | 10.46726 | 0.01729  |
| cg15104644 | 3.623777 | 1.314075 | 9.993158 | 0.012857 |
| cg00177388 | 3.622744 | 1.102125 | 11.90816 | 0.033996 |
| cg02622052 | 3.622199 | 1.196003 | 10.97015 | 0.022813 |
| cg10038009 | 3.621185 | 1.408907 | 9.307199 | 0.007546 |
| cg25886284 | 3.62068  | 1.271679 | 10.30867 | 0.015945 |
| cg02320740 | 3.618989 | 1.171977 | 11.1752  | 0.025363 |
| cg26727693 | 3.618657 | 1.302567 | 10.05298 | 0.013624 |
| cg10216615 | 3.618153 | 1.139522 | 11.48817 | 0.029144 |
| cg15428435 | 3.617712 | 1.28459  | 10.18833 | 0.014932 |
| cg10541517 | 3.616662 | 1.201646 | 10.88527 | 0.022213 |
| cg19542816 | 3.616332 | 1.29092  | 10.13065 | 0.014452 |
| cg24390913 | 3.615731 | 1.258367 | 10.38926 | 0.017    |
| cg05048377 | 3.613689 | 1.286556 | 10.15016 | 0.014763 |
| cg24913868 | 3.611805 | 1.210965 | 10.77251 | 0.021263 |
| cg15854847 | 3.611403 | 1.118081 | 11.66483 | 0.03183  |
| cg13563725 | 3.608228 | 1.093677 | 11.90417 | 0.035118 |
| cg03045635 | 3.606354 | 1.195575 | 10.87828 | 0.022782 |
| cg05661282 | 3.604532 | 1.297444 | 10.01404 | 0.013915 |
| cg01495122 | 3.604506 | 1.080948 | 12.01951 | 0.036921 |
| cg14627172 | 3.602411 | 1.536638 | 8.445301 | 0.003196 |
| cg16705627 | 3.601136 | 1.077502 | 12.0354  | 0.037414 |
| cg21185289 | 3.601105 | 1.360852 | 9.529295 | 0.009865 |
| cg03437186 | 3.600057 | 1.380568 | 9.387736 | 0.008807 |



|            |          |          |          |          |
|------------|----------|----------|----------|----------|
| cg08044097 | 3.599317 | 1.093705 | 11.84513 | 0.035088 |
| cg16587616 | 3.597019 | 1.19604  | 10.81783 | 0.02269  |
| cg08575537 | 3.596219 | 1.301325 | 9.938168 | 0.013594 |
| cg04562217 | 3.595135 | 1.139222 | 11.34546 | 0.02909  |
| cg17793621 | 3.594757 | 1.102429 | 11.72164 | 0.033866 |
| cg25655234 | 3.594497 | 1.144647 | 11.28768 | 0.028426 |
| cg27234067 | 3.592585 | 1.040093 | 12.40914 | 0.043164 |
| cg11831238 | 3.591797 | 1.095514 | 11.77621 | 0.034812 |
| cg20174066 | 3.591722 | 1.348084 | 9.569487 | 0.010547 |
| cg17924936 | 3.591599 | 1.523587 | 8.466587 | 0.003474 |
| cg08857144 | 3.590502 | 1.139158 | 11.31687 | 0.02908  |
| cg06737561 | 3.588774 | 1.116222 | 11.5383  | 0.031994 |
| cg07217924 | 3.587346 | 1.06781  | 12.05181 | 0.038821 |
| cg02441747 | 3.587334 | 1.212048 | 10.61753 | 0.021037 |
| cg00319168 | 3.586233 | 1.004925 | 12.79804 | 0.049122 |
| cg02012703 | 3.58596  | 1.308874 | 9.824561 | 0.013013 |
| cg05134015 | 3.584231 | 1.170608 | 10.97439 | 0.025361 |
| cg13794530 | 3.58357  | 1.258156 | 10.20698 | 0.016849 |
| cg09355771 | 3.583408 | 1.059218 | 12.12292 | 0.040123 |
| cg02009585 | 3.582437 | 1.210667 | 10.60065 | 0.021148 |
| cg24945701 | 3.581698 | 1.217551 | 10.53636 | 0.020475 |
| cg26332560 | 3.581448 | 1.023721 | 12.52955 | 0.045863 |
| cg19851909 | 3.580711 | 1.163672 | 11.01813 | 0.026129 |
| cg12860391 | 3.580008 | 1.137566 | 11.26656 | 0.029234 |
| cg18384778 | 3.579463 | 1.183078 | 10.82985 | 0.023971 |
| cg09853371 | 3.577056 | 1.197457 | 10.68542 | 0.022448 |
| cg00840960 | 3.576949 | 1.276707 | 10.02153 | 0.015321 |
| cg05311410 | 3.576003 | 1.535416 | 8.328557 | 0.003136 |
| cg14370314 | 3.575039 | 1.094714 | 11.67511 | 0.034873 |
| cg22954449 | 3.574025 | 1.445329 | 8.837889 | 0.005827 |
| cg03963198 | 3.573178 | 1.086733 | 11.74862 | 0.036    |
| cg17689721 | 3.57271  | 1.212113 | 10.53059 | 0.020957 |
| cg24190603 | 3.570712 | 1.401648 | 9.096424 | 0.007638 |
| cg02657401 | 3.570566 | 1.308098 | 9.746162 | 0.012985 |
| cg10325478 | 3.570286 | 1.09223  | 11.67057 | 0.035209 |
| cg09980058 | 3.570217 | 1.295222 | 9.841128 | 0.013894 |
| cg12684209 | 3.56838  | 1.054312 | 12.07739 | 0.040856 |
| cg02886408 | 3.566106 | 1.16374  | 10.9278  | 0.026057 |
| cg15698842 | 3.564901 | 1.092757 | 11.62978 | 0.035118 |
| cg18382893 | 3.563678 | 1.122298 | 11.31589 | 0.031108 |
| cg14714797 | 3.563671 | 1.269631 | 10.00271 | 0.015808 |
| cg11362010 | 3.563616 | 1.345313 | 9.439703 | 0.010565 |
| cg18755296 | 3.563362 | 1.354281 | 9.375859 | 0.010042 |
| cg24727311 | 3.562345 | 1.24978  | 10.15402 | 0.017446 |
| cg19939997 | 3.561817 | 1.059376 | 11.97549 | 0.040054 |
| cg25999442 | 3.561674 | 1.37172  | 9.247896 | 0.009075 |
| cg14448169 | 3.560195 | 1.333631 | 9.504122 | 0.011256 |
| cg18101138 | 3.55996  | 1.055914 | 12.00223 | 0.040589 |
| cg03146949 | 3.559848 | 1.193752 | 10.6157  | 0.022747 |
| cg14885748 | 3.559079 | 1.25704  | 10.07688 | 0.016813 |
| cg03425110 | 3.557462 | 1.240024 | 10.20588 | 0.018273 |
| cg07565505 | 3.555723 | 1.107393 | 11.41705 | 0.03306  |
| cg05756489 | 3.554831 | 1.161644 | 10.8784  | 0.026247 |
| cg21041775 | 3.552857 | 1.332186 | 9.475246 | 0.011307 |

|            |          |          |          |          |
|------------|----------|----------|----------|----------|
| cg04963514 | 3.552456 | 1.309518 | 9.637088 | 0.01279  |
| cg07788369 | 3.551358 | 1.209615 | 10.42657 | 0.021095 |
| cg05229355 | 3.550369 | 1.012309 | 12.45185 | 0.047808 |
| cg15054725 | 3.548335 | 1.33648  | 9.420775 | 0.011017 |
| cg07252731 | 3.546145 | 1.211089 | 10.38334 | 0.020924 |
| cg17498773 | 3.5461   | 1.335992 | 9.412355 | 0.011036 |
| cg00310215 | 3.545843 | 1.172096 | 10.72693 | 0.025019 |
| cg03815358 | 3.543436 | 1.104489 | 11.3681  | 0.033415 |
| cg27393010 | 3.541105 | 1.309287 | 9.57729  | 0.012745 |
| cg11248413 | 3.538219 | 1.078808 | 11.60448 | 0.037057 |
| cg15708153 | 3.538166 | 1.411309 | 8.870219 | 0.007046 |
| cg06272611 | 3.537637 | 1.162504 | 10.76545 | 0.026071 |
| cg04223420 | 3.537599 | 1.158838 | 10.79928 | 0.026496 |
| cg18161327 | 3.536152 | 1.384286 | 9.033082 | 0.008302 |
| cg26309134 | 3.536079 | 1.342546 | 9.31354  | 0.010585 |
| cg23346462 | 3.530454 | 1.310435 | 9.511427 | 0.012609 |
| cg02350677 | 3.529771 | 1.057671 | 11.77992 | 0.040252 |
| cg06164660 | 3.529506 | 1.218701 | 10.22188 | 0.020098 |
| cg12840502 | 3.525257 | 1.263683 | 9.834295 | 0.016081 |
| cg00481629 | 3.524972 | 1.139799 | 10.90141 | 0.028734 |
| cg03882242 | 3.524298 | 1.372992 | 9.046436 | 0.008818 |
| cg18115215 | 3.52303  | 1.188    | 10.44759 | 0.023173 |
| cg11823511 | 3.522825 | 1.106891 | 11.21185 | 0.033016 |
| cg17509967 | 3.522606 | 1.212266 | 10.236   | 0.020687 |
| cg12993163 | 3.52171  | 1.27627  | 9.717728 | 0.015057 |
| cg11597131 | 3.521418 | 1.429927 | 8.672041 | 0.006187 |
| cg01586959 | 3.518731 | 1.240278 | 9.982813 | 0.018044 |
| cg00090936 | 3.518387 | 1.227638 | 10.08363 | 0.019194 |
| cg03058660 | 3.518293 | 1.281791 | 9.657099 | 0.014612 |
| cg06496344 | 3.517936 | 1.337579 | 9.252442 | 0.010788 |
| cg08120263 | 3.516585 | 1.204805 | 10.2642  | 0.021399 |
| cg13031171 | 3.514724 | 1.032872 | 11.96013 | 0.044249 |
| cg06549216 | 3.514556 | 1.019387 | 12.11718 | 0.04655  |
| cg04347874 | 3.514379 | 1.427738 | 8.650647 | 0.006242 |
| cg16987305 | 3.514186 | 1.420955 | 8.690987 | 0.00652  |
| cg15272362 | 3.513322 | 1.349017 | 9.149947 | 0.010083 |
| cg18325622 | 3.512991 | 1.141376 | 10.81248 | 0.028488 |
| cg04733537 | 3.511863 | 1.175921 | 10.4881  | 0.024432 |
| cg11552072 | 3.511232 | 1.194904 | 10.31777 | 0.022387 |
| cg05036656 | 3.509114 | 1.202955 | 10.23636 | 0.021548 |
| cg10567810 | 3.507134 | 1.023547 | 12.01703 | 0.045825 |
| cg12250896 | 3.506514 | 1.261927 | 9.743547 | 0.016123 |
| cg22340508 | 3.5054   | 1.271011 | 9.66776  | 0.015381 |
| cg17847723 | 3.50123  | 1.095379 | 11.19121 | 0.034548 |
| cg19492047 | 3.500469 | 1.292908 | 9.477306 | 0.013683 |
| cg18787401 | 3.497192 | 1.287043 | 9.502679 | 0.014098 |
| cg17910121 | 3.494387 | 1.027987 | 11.8783  | 0.045051 |
| cg26692294 | 3.494277 | 1.098596 | 11.11416 | 0.03407  |
| cg13702053 | 3.490819 | 1.028412 | 11.84916 | 0.044974 |
| cg07291445 | 3.490814 | 1.308544 | 9.312474 | 0.012521 |
| cg24415208 | 3.489583 | 1.186409 | 10.26391 | 0.023177 |
| cg26343001 | 3.489288 | 1.214493 | 10.02486 | 0.020295 |
| cg17722675 | 3.488508 | 1.061405 | 11.46564 | 0.039578 |
| cg00840332 | 3.486459 | 1.212629 | 10.024   | 0.020463 |

|            |          |          |          |          |
|------------|----------|----------|----------|----------|
| cg21543987 | 3.486394 | 1.209962 | 10.04572 | 0.020726 |
| cg00028935 | 3.486341 | 1.09607  | 11.08923 | 0.034401 |
| cg04784475 | 3.482688 | 1.011692 | 11.98894 | 0.047884 |
| cg03237606 | 3.47972  | 1.00345  | 12.06682 | 0.049369 |
| cg11784623 | 3.479194 | 1.051676 | 11.51    | 0.041101 |
| cg05522774 | 3.47864  | 1.091056 | 11.09103 | 0.035094 |
| cg08516516 | 3.478046 | 1.243317 | 9.72946  | 0.017553 |
| cg18276638 | 3.477959 | 1.334993 | 9.060869 | 0.01073  |
| cg08586541 | 3.477067 | 1.102651 | 10.96448 | 0.033443 |
| cg04510512 | 3.476093 | 1.237309 | 9.765723 | 0.018079 |
| cg25442600 | 3.47585  | 1.018767 | 11.85897 | 0.046629 |
| cg13982529 | 3.475072 | 1.201284 | 10.05268 | 0.021542 |
| cg04542030 | 3.474555 | 1.029794 | 11.72324 | 0.04472  |
| cg15811515 | 3.472809 | 1.240858 | 9.719408 | 0.017743 |
| cg04996873 | 3.472692 | 1.34496  | 8.966506 | 0.010102 |
| cg23906738 | 3.471323 | 1.29568  | 9.300201 | 0.013319 |
| cg04005969 | 3.469264 | 1.169623 | 10.29032 | 0.024935 |
| cg22428147 | 3.464175 | 1.133017 | 10.59164 | 0.029333 |
| cg13458645 | 3.463793 | 1.039295 | 11.54423 | 0.043102 |
| cg07099331 | 3.46346  | 1.280864 | 9.365205 | 0.014377 |
| cg12764034 | 3.459404 | 1.040009 | 11.5071  | 0.042977 |
| cg08441170 | 3.456952 | 1.448966 | 8.24762  | 0.005176 |
| cg02401454 | 3.455879 | 1.138766 | 10.48775 | 0.028569 |
| cg05923687 | 3.454883 | 1.070527 | 11.14985 | 0.038082 |
| cg19096825 | 3.452531 | 1.349342 | 8.833914 | 0.009737 |
| cg08784129 | 3.451835 | 1.144937 | 10.40683 | 0.027782 |
| cg18325439 | 3.450572 | 1.126367 | 10.57066 | 0.030137 |
| cg01350077 | 3.450502 | 1.263369 | 9.423983 | 0.015692 |
| cg02318567 | 3.448896 | 1.181701 | 10.0659  | 0.023484 |
| cg27553667 | 3.448752 | 1.175474 | 10.11838 | 0.024174 |
| cg26371320 | 3.447064 | 1.21325  | 9.793735 | 0.020191 |
| cg21124497 | 3.44611  | 1.296943 | 9.156669 | 0.013085 |
| cg21745612 | 3.44526  | 1.000232 | 11.86706 | 0.049957 |
| cg02428119 | 3.445215 | 1.13436  | 10.46362 | 0.029081 |
| cg07915921 | 3.445188 | 1.233606 | 9.621641 | 0.018245 |
| cg06653699 | 3.444486 | 1.103541 | 10.75128 | 0.033203 |
| cg04698114 | 3.443919 | 1.291063 | 9.186681 | 0.0135   |
| cg23714408 | 3.443731 | 1.056604 | 11.22396 | 0.040238 |
| cg19610529 | 3.442511 | 1.289734 | 9.188626 | 0.01359  |
| cg23290344 | 3.439161 | 1.071256 | 11.04108 | 0.037928 |
| cg00378510 | 3.437874 | 1.15205  | 10.25908 | 0.026849 |
| cg04557544 | 3.437325 | 1.321382 | 8.94155  | 0.011364 |
| cg17046577 | 3.437164 | 1.025573 | 11.51951 | 0.045405 |
| cg09894698 | 3.436871 | 1.104957 | 10.69008 | 0.032978 |
| cg22851691 | 3.436827 | 1.271521 | 9.289489 | 0.014955 |
| cg13246235 | 3.436435 | 1.250503 | 9.443471 | 0.016694 |
| cg07477792 | 3.435651 | 1.09809  | 10.74931 | 0.033943 |
| cg04131583 | 3.435492 | 1.247094 | 9.464082 | 0.016984 |
| cg17892178 | 3.434023 | 1.132096 | 10.41653 | 0.029324 |
| cg23676439 | 3.433242 | 1.005721 | 11.7201  | 0.048945 |
| cg19288904 | 3.432754 | 1.295898 | 9.093154 | 0.013084 |
| cg23421023 | 3.431963 | 1.071384 | 10.9936  | 0.03789  |
| cg26195356 | 3.431362 | 1.16818  | 10.07914 | 0.024915 |
| cg14258623 | 3.430969 | 1.068973 | 11.01201 | 0.038259 |

|            |          |          |          |          |
|------------|----------|----------|----------|----------|
| cg26460092 | 3.43033  | 1.258774 | 9.348111 | 0.015957 |
| cg15408073 | 3.429539 | 1.011496 | 11.62807 | 0.047894 |
| cg14062050 | 3.429019 | 1.160841 | 10.12901 | 0.025758 |
| cg16420199 | 3.428627 | 1.113044 | 10.56157 | 0.03183  |
| cg01739725 | 3.428174 | 1.23272  | 9.533694 | 0.018231 |
| cg09233651 | 3.428095 | 1.163031 | 10.10449 | 0.025496 |
| cg03224572 | 3.425281 | 1.311872 | 8.943365 | 0.011926 |
| cg01878345 | 3.424606 | 1.500951 | 7.813666 | 0.003446 |
| cg19560710 | 3.424397 | 1.141725 | 10.27086 | 0.028058 |
| cg18082337 | 3.424258 | 1.277291 | 9.180012 | 0.01443  |
| cg10416527 | 3.423827 | 1.326123 | 8.839746 | 0.010984 |
| cg10486998 | 3.421076 | 1.174114 | 9.968163 | 0.024188 |
| cg18372607 | 3.420553 | 1.277375 | 9.159554 | 0.014402 |
| cg15312264 | 3.419208 | 1.235097 | 9.465641 | 0.017963 |
| cg14131755 | 3.418392 | 1.107721 | 10.54905 | 0.032525 |
| cg06946708 | 3.417313 | 1.09748  | 10.64077 | 0.033966 |
| cg07113642 | 3.415726 | 1.276652 | 9.138891 | 0.01443  |
| cg18774195 | 3.411291 | 1.089264 | 10.68328 | 0.035138 |
| cg10410142 | 3.410973 | 1.386596 | 8.39086  | 0.007548 |
| cg25088758 | 3.409652 | 1.201362 | 9.677117 | 0.021186 |
| cg17542408 | 3.408254 | 1.37475  | 8.44968  | 0.00812  |
| cg19472098 | 3.407523 | 1.324723 | 8.765011 | 0.01098  |
| cg27042584 | 3.40692  | 1.091699 | 10.63215 | 0.034767 |
| cg11723848 | 3.406647 | 1.136916 | 10.20766 | 0.028587 |
| cg10358533 | 3.406196 | 1.215409 | 9.5459   | 0.019754 |
| cg03304610 | 3.405683 | 1.378309 | 8.415152 | 0.007927 |
| cg03289872 | 3.40506  | 1.288384 | 8.999205 | 0.013475 |
| cg09885735 | 3.401582 | 1.160752 | 9.968327 | 0.025634 |
| cg02589791 | 3.400716 | 1.304639 | 8.864421 | 0.01228  |
| cg21656751 | 3.400533 | 1.028826 | 11.23964 | 0.044797 |
| cg20884887 | 3.400027 | 1.504145 | 7.685554 | 0.003271 |
| cg04917226 | 3.399808 | 1.13457  | 10.18773 | 0.028857 |
| cg05039548 | 3.398707 | 1.050756 | 10.99324 | 0.041089 |
| cg01240056 | 3.398641 | 1.225507 | 9.425293 | 0.018738 |
| cg02978421 | 3.397685 | 1.226466 | 9.412622 | 0.018642 |
| cg07696699 | 3.396197 | 1.330746 | 8.667435 | 0.010536 |
| cg19084589 | 3.393626 | 1.196827 | 9.622695 | 0.02157  |
| cg01939477 | 3.392431 | 1.33934  | 8.592728 | 0.009991 |
| cg02743222 | 3.389962 | 1.106006 | 10.3904  | 0.032657 |
| cg20927661 | 3.389729 | 1.379484 | 8.32939  | 0.007784 |
| cg16422098 | 3.389306 | 1.221194 | 9.406693 | 0.019096 |
| cg03032214 | 3.389239 | 1.223383 | 9.389489 | 0.018886 |
| cg25339566 | 3.385551 | 1.337904 | 8.567102 | 0.010038 |
| cg08526074 | 3.384833 | 1.309035 | 8.752319 | 0.011885 |
| cg10659805 | 3.384297 | 1.206352 | 9.494302 | 0.020536 |
| cg10521851 | 3.382636 | 1.073544 | 10.65837 | 0.03742  |
| cg04853843 | 3.382191 | 1.029813 | 11.10805 | 0.044603 |
| cg04248446 | 3.381412 | 1.232562 | 9.276569 | 0.017979 |
| cg07466705 | 3.378804 | 1.006974 | 11.33725 | 0.048699 |
| cg04035209 | 3.376745 | 1.133107 | 10.06295 | 0.028943 |
| cg01995480 | 3.37642  | 1.199356 | 9.505276 | 0.021212 |
| cg03940684 | 3.375504 | 1.170537 | 9.734023 | 0.024362 |
| cg05686497 | 3.375243 | 1.25514  | 9.076491 | 0.015943 |
| cg20567847 | 3.372101 | 1.50448  | 7.558136 | 0.003159 |

|            |          |          |          |          |
|------------|----------|----------|----------|----------|
| cg01559663 | 3.371453 | 1.143745 | 9.938137 | 0.027562 |
| cg11334771 | 3.369889 | 1.146437 | 9.905605 | 0.027218 |
| cg15959715 | 3.369711 | 1.380737 | 8.223831 | 0.007615 |
| cg16357388 | 3.368581 | 1.185617 | 9.570831 | 0.022635 |
| cg10603275 | 3.367903 | 1.356155 | 8.363921 | 0.008886 |
| cg05085500 | 3.365905 | 1.106676 | 10.23725 | 0.032471 |
| cg21806015 | 3.365729 | 1.065181 | 10.63494 | 0.038684 |
| cg17504999 | 3.365209 | 1.069188 | 10.59181 | 0.03805  |
| cg13874817 | 3.363904 | 1.134858 | 9.971156 | 0.028658 |
| cg00926400 | 3.360593 | 1.176251 | 9.60134  | 0.023633 |
| cg17460447 | 3.360098 | 1.514926 | 7.45268  | 0.002864 |
| cg09548051 | 3.360085 | 1.255688 | 8.991221 | 0.015807 |
| cg15384598 | 3.359499 | 1.396717 | 8.080548 | 0.006808 |
| cg24723331 | 3.359395 | 1.239358 | 9.105949 | 0.01723  |
| cg06750832 | 3.357037 | 1.245186 | 9.050614 | 0.016697 |
| cg05991454 | 3.356819 | 1.167025 | 9.655519 | 0.024672 |
| cg23263937 | 3.355969 | 1.293537 | 8.706766 | 0.012807 |
| cg24842086 | 3.355453 | 1.090943 | 10.32049 | 0.034703 |
| cg05619892 | 3.354721 | 1.154388 | 9.749017 | 0.026166 |
| cg25652029 | 3.354469 | 1.319798 | 8.5259   | 0.010991 |
| cg08196032 | 3.353862 | 1.077414 | 10.44018 | 0.036738 |
| cg03813164 | 3.353712 | 1.301479 | 8.642    | 0.012225 |
| cg06749053 | 3.353556 | 1.256066 | 8.953615 | 0.015736 |
| cg10250663 | 3.353469 | 1.203573 | 9.343645 | 0.020647 |
| cg20631104 | 3.352407 | 1.157244 | 9.711547 | 0.025809 |
| cg08610862 | 3.35207  | 1.438677 | 7.81021  | 0.005067 |
| cg00651523 | 3.351291 | 1.088614 | 10.31693 | 0.035035 |
| cg14186641 | 3.350883 | 1.339984 | 8.379515 | 0.009716 |
| cg21477176 | 3.349924 | 1.157467 | 9.695299 | 0.02577  |
| cg16670554 | 3.349705 | 1.260124 | 8.904303 | 0.015373 |
| cg18147485 | 3.349651 | 1.5056   | 7.452286 | 0.003048 |
| cg18863595 | 3.348392 | 1.277847 | 8.773921 | 0.01394  |
| cg07949597 | 3.346884 | 1.298827 | 8.624423 | 0.012372 |
| cg03401357 | 3.346043 | 1.276302 | 8.772217 | 0.014046 |
| cg01582980 | 3.345868 | 1.043502 | 10.72813 | 0.042195 |
| cg13486532 | 3.345697 | 1.236594 | 9.052028 | 0.0174   |
| cg13352836 | 3.345167 | 1.22702  | 9.119766 | 0.018286 |
| cg23322933 | 3.344532 | 1.208507 | 9.255964 | 0.020093 |
| cg03338754 | 3.342473 | 1.084524 | 10.3014  | 0.035618 |
| cg12786548 | 3.342397 | 1.130103 | 9.885485 | 0.029181 |
| cg08538258 | 3.339173 | 1.219785 | 9.14102  | 0.018944 |
| cg13438893 | 3.338303 | 1.234856 | 9.024752 | 0.017515 |
| cg23082454 | 3.337158 | 1.147405 | 9.705927 | 0.026939 |
| cg09835225 | 3.33562  | 1.309369 | 8.497498 | 0.011572 |
| cg09615505 | 3.334661 | 1.007855 | 11.03329 | 0.048521 |
| cg10406295 | 3.334404 | 1.171075 | 9.494054 | 0.024085 |
| cg07900968 | 3.334371 | 1.302889 | 8.533365 | 0.012011 |
| cg13434308 | 3.333954 | 1.116344 | 9.956835 | 0.030996 |
| cg24896649 | 3.333772 | 1.166808 | 9.525165 | 0.024578 |
| cg05336698 | 3.333746 | 1.243364 | 8.938543 | 0.016719 |
| cg05523056 | 3.331573 | 1.031258 | 10.76295 | 0.044282 |
| cg09474331 | 3.331358 | 1.438104 | 7.71707  | 0.00499  |
| cg24347663 | 3.33057  | 1.056115 | 10.5033  | 0.04006  |
| cg12300353 | 3.330489 | 1.269909 | 8.734609 | 0.014458 |

|            |          |          |          |          |
|------------|----------|----------|----------|----------|
| cg03738025 | 3.330146 | 1.283552 | 8.639987 | 0.013393 |
| cg00970396 | 3.329672 | 1.218585 | 9.098026 | 0.019005 |
| cg23420260 | 3.328919 | 1.273916 | 8.698923 | 0.01413  |
| cg10648197 | 3.328822 | 1.11845  | 9.907515 | 0.030685 |
| cg09142313 | 3.326867 | 1.308682 | 8.457399 | 0.011567 |
| cg23500059 | 3.326717 | 1.240341 | 8.922581 | 0.016947 |
| cg25936054 | 3.325741 | 1.122903 | 9.84996  | 0.030067 |
| cg17795158 | 3.324553 | 1.12686  | 9.808362 | 0.02953  |
| cg21678445 | 3.324552 | 1.44272  | 7.660976 | 0.004795 |
| cg13843613 | 3.323071 | 1.039929 | 10.6188  | 0.042763 |
| cg01729827 | 3.321005 | 1.190283 | 9.265931 | 0.021866 |
| cg23474501 | 3.320645 | 1.124286 | 9.807725 | 0.029858 |
| cg03182917 | 3.317178 | 1.052339 | 10.45639 | 0.040653 |
| cg07450037 | 3.316201 | 1.158408 | 9.493361 | 0.025484 |
| cg06544111 | 3.315645 | 1.26247  | 8.707929 | 0.014972 |
| cg07039180 | 3.313793 | 1.194619 | 9.192237 | 0.021359 |
| cg22747746 | 3.311463 | 1.195812 | 9.17016  | 0.021219 |
| cg02700891 | 3.31018  | 1.235614 | 8.867892 | 0.017277 |
| cg23054189 | 3.309008 | 1.157482 | 9.459784 | 0.025559 |
| cg19267252 | 3.307261 | 1.102829 | 9.918106 | 0.03279  |
| cg10126205 | 3.307023 | 1.286756 | 8.499208 | 0.013011 |
| cg17422774 | 3.30702  | 1.09485  | 9.988934 | 0.033953 |
| cg19469447 | 3.30332  | 1.000744 | 10.90381 | 0.049858 |
| cg00348762 | 3.303076 | 1.17219  | 9.30763  | 0.023788 |
| cg02681442 | 3.302875 | 1.221517 | 8.930687 | 0.018561 |
| cg05186311 | 3.3019   | 1.051967 | 10.36396 | 0.04068  |
| cg21545390 | 3.301068 | 1.075671 | 10.13047 | 0.036846 |
| cg23737737 | 3.299658 | 1.39039  | 7.830711 | 0.006781 |
| cg10831607 | 3.296581 | 1.327187 | 8.188331 | 0.010177 |
| cg10386483 | 3.296269 | 1.135206 | 9.571294 | 0.028298 |
| cg08276295 | 3.295058 | 1.296088 | 8.377063 | 0.012254 |
| cg18897632 | 3.294764 | 1.324753 | 8.194332 | 0.01032  |
| cg17087640 | 3.28991  | 1.018115 | 10.63093 | 0.046595 |
| cg24439256 | 3.289905 | 1.158432 | 9.34321  | 0.025344 |
| cg24292761 | 3.289169 | 1.148288 | 9.421533 | 0.02659  |
| cg14659193 | 3.287984 | 1.123317 | 9.624031 | 0.029842 |
| cg05043349 | 3.287475 | 1.242806 | 8.696041 | 0.016488 |
| cg19712603 | 3.286769 | 1.188841 | 9.086877 | 0.021828 |
| cg05588496 | 3.286036 | 1.028998 | 10.49373 | 0.04462  |
| cg23068913 | 3.284711 | 1.137699 | 9.483467 | 0.027918 |
| cg19761848 | 3.283886 | 1.175281 | 9.175598 | 0.023327 |
| cg09016242 | 3.283564 | 1.316486 | 8.189822 | 0.010784 |
| cg06201642 | 3.28299  | 1.049323 | 10.2714  | 0.041083 |
| cg25744613 | 3.281217 | 1.142074 | 9.427042 | 0.027337 |
| cg08939095 | 3.281195 | 1.080771 | 9.961629 | 0.035989 |
| cg18921980 | 3.279714 | 1.092871 | 9.842451 | 0.034145 |
| cg22047387 | 3.278982 | 1.212355 | 8.868456 | 0.01932  |
| cg06715976 | 3.278543 | 1.285787 | 8.359741 | 0.012907 |
| cg04138502 | 3.276383 | 1.07709  | 9.966381 | 0.036546 |
| cg00294096 | 3.276341 | 1.02408  | 10.482   | 0.045493 |
| cg18705773 | 3.275239 | 1.210339 | 8.862963 | 0.019501 |
| cg14002960 | 3.274828 | 1.218931 | 8.798281 | 0.018643 |
| cg11224582 | 3.274362 | 1.438725 | 7.452046 | 0.0047   |
| cg25527090 | 3.2727   | 1.075275 | 9.960765 | 0.036819 |

|            |          |          |          |          |
|------------|----------|----------|----------|----------|
| cg15617155 | 3.271393 | 1.232613 | 8.682374 | 0.017317 |
| cg24213719 | 3.270803 | 1.202757 | 8.894696 | 0.020252 |
| cg04597433 | 3.270771 | 1.137582 | 9.404106 | 0.027865 |
| cg16138150 | 3.270709 | 1.161515 | 9.209985 | 0.02487  |
| cg00741609 | 3.270422 | 1.025119 | 10.43357 | 0.045298 |
| cg05292954 | 3.268588 | 1.266602 | 8.434902 | 0.014342 |
| cg09422450 | 3.26807  | 1.138823 | 9.378354 | 0.02769  |
| cg13092806 | 3.267865 | 1.348705 | 7.917923 | 0.008729 |
| cg11064034 | 3.266508 | 1.103502 | 9.669285 | 0.03253  |
| cg25104105 | 3.266383 | 1.323309 | 8.062556 | 0.01024  |
| cg01485075 | 3.266295 | 1.295358 | 8.236089 | 0.012129 |
| cg06392169 | 3.265496 | 1.185433 | 8.995414 | 0.02208  |
| cg16269733 | 3.263754 | 1.234526 | 8.628484 | 0.017092 |
| cg05157140 | 3.263712 | 1.459746 | 7.297036 | 0.003959 |
| cg00614182 | 3.262587 | 1.108226 | 9.604966 | 0.031834 |
| cg18599790 | 3.261524 | 1.181672 | 9.002106 | 0.022476 |
| cg01815671 | 3.260637 | 1.132354 | 9.389071 | 0.028502 |
| cg17023770 | 3.260341 | 1.033881 | 10.28148 | 0.043714 |
| cg14695492 | 3.25999  | 1.105035 | 9.617375 | 0.032281 |
| cg19149681 | 3.256265 | 1.075004 | 9.863458 | 0.036809 |
| cg10453719 | 3.256177 | 1.112236 | 9.532771 | 0.031236 |
| cg21547690 | 3.256079 | 1.283814 | 8.258245 | 0.012915 |
| cg23900203 | 3.255806 | 1.01363  | 10.45773 | 0.047401 |
| cg23234640 | 3.255256 | 1.105939 | 9.581627 | 0.032131 |
| cg03781266 | 3.25399  | 1.080789 | 9.796961 | 0.035895 |
| cg14441976 | 3.252198 | 1.209983 | 8.741274 | 0.019397 |
| cg13875518 | 3.250637 | 1.110048 | 9.51909  | 0.031523 |
| cg03442425 | 3.25021  | 1.077987 | 9.799623 | 0.03632  |
| cg10034890 | 3.248798 | 1.473578 | 7.162624 | 0.003488 |
| cg10959353 | 3.247978 | 1.1984   | 8.802872 | 0.020572 |
| cg11842610 | 3.246783 | 1.325354 | 7.953797 | 0.009991 |
| cg25775322 | 3.244659 | 1.129327 | 9.322204 | 0.028828 |
| cg14781189 | 3.23825  | 1.11594  | 9.396798 | 0.030635 |
| cg00824018 | 3.236052 | 1.089587 | 9.611008 | 0.034477 |
| cg22875872 | 3.234829 | 1.302257 | 8.035371 | 0.011443 |
| cg06785999 | 3.23306  | 1.212289 | 8.62227  | 0.019047 |
| cg18497508 | 3.232703 | 1.039021 | 10.0579  | 0.042758 |
| cg15146859 | 3.231631 | 1.28845  | 8.105427 | 0.012414 |
| cg18468354 | 3.230108 | 1.258978 | 8.287355 | 0.014727 |
| cg21751684 | 3.22988  | 1.003572 | 10.39499 | 0.049305 |
| cg27288226 | 3.229306 | 1.119684 | 9.313711 | 0.030072 |
| cg07519816 | 3.229136 | 1.042577 | 10.00148 | 0.042128 |
| cg16509851 | 3.228711 | 1.026612 | 10.15434 | 0.044975 |
| cg08829841 | 3.226686 | 1.082969 | 9.613849 | 0.035461 |
| cg04281464 | 3.22659  | 1.324875 | 7.858012 | 0.009897 |
| cg26814276 | 3.22622  | 1.352001 | 7.698585 | 0.0083   |
| cg21859781 | 3.22603  | 1.192688 | 8.725895 | 0.021052 |
| cg24369185 | 3.225668 | 1.251185 | 8.316063 | 0.015362 |
| cg16935065 | 3.223685 | 1.318698 | 7.880608 | 0.010272 |
| cg14738806 | 3.221564 | 1.219451 | 8.510778 | 0.018263 |
| cg03577655 | 3.221185 | 1.249658 | 8.303095 | 0.015466 |
| cg01603847 | 3.219454 | 1.241123 | 8.351214 | 0.016211 |
| cg21776417 | 3.217203 | 1.202787 | 8.605345 | 0.019923 |
| cg07212852 | 3.216853 | 1.027166 | 10.07446 | 0.044858 |

|            |          |          |          |          |
|------------|----------|----------|----------|----------|
| cg11254700 | 3.216306 | 1.104923 | 9.3623   | 0.032114 |
| cg05178576 | 3.215938 | 1.096448 | 9.432516 | 0.033364 |
| cg02172312 | 3.215492 | 1.025687 | 10.08045 | 0.045127 |
| cg14231297 | 3.214495 | 1.011904 | 10.21142 | 0.0477   |
| cg07920503 | 3.214107 | 1.375344 | 7.511197 | 0.007021 |
| cg21606928 | 3.213536 | 1.21142  | 8.524554 | 0.019013 |
| cg25116216 | 3.210589 | 1.19731  | 8.609206 | 0.020461 |
| cg06428620 | 3.208992 | 1.343256 | 7.666168 | 0.008688 |
| cg11885396 | 3.20899  | 1.074123 | 9.587004 | 0.036796 |
| cg26104297 | 3.207264 | 1.06723  | 9.638546 | 0.037907 |
| cg14470895 | 3.206936 | 1.198522 | 8.580934 | 0.020309 |
| cg00812833 | 3.206842 | 1.122566 | 9.161005 | 0.029567 |
| cg17603132 | 3.206774 | 1.109993 | 9.264381 | 0.031338 |
| cg21517947 | 3.206041 | 1.233659 | 8.331879 | 0.016807 |
| cg10569606 | 3.205626 | 1.064699 | 9.65159  | 0.038317 |
| cg10615414 | 3.205386 | 1.146077 | 8.964926 | 0.026433 |
| cg02828023 | 3.203319 | 1.272257 | 8.065395 | 0.013471 |
| cg17971015 | 3.202225 | 1.056669 | 9.70431  | 0.039647 |
| cg09772661 | 3.2012   | 1.105171 | 9.272484 | 0.032013 |
| cg02767771 | 3.200019 | 1.318791 | 7.764782 | 0.010117 |
| cg08086720 | 3.198642 | 1.319057 | 7.756533 | 0.010092 |
| cg25201047 | 3.197905 | 1.122002 | 9.114593 | 0.029602 |
| cg13407456 | 3.196756 | 1.246001 | 8.201638 | 0.015628 |
| cg14072515 | 3.195063 | 1.324914 | 7.704971 | 0.009698 |
| cg13834623 | 3.194917 | 1.055299 | 9.672609 | 0.03986  |
| cg16230141 | 3.194209 | 1.128178 | 9.043761 | 0.028736 |
| cg05733135 | 3.193658 | 1.039818 | 9.80888  | 0.042544 |
| cg05825073 | 3.192569 | 1.136463 | 8.968609 | 0.027616 |
| cg14625113 | 3.190951 | 1.236619 | 8.233879 | 0.016436 |
| cg21331088 | 3.189845 | 1.119267 | 9.090868 | 0.029944 |
| cg05680531 | 3.189841 | 1.143384 | 8.899098 | 0.026696 |
| cg20764887 | 3.189106 | 1.119798 | 9.082346 | 0.029866 |
| cg23905216 | 3.188518 | 1.044033 | 9.737859 | 0.041789 |
| cg08776356 | 3.187071 | 1.142061 | 8.89394  | 0.026853 |
| cg26272220 | 3.186471 | 1.289588 | 7.873521 | 0.012039 |
| cg04748834 | 3.186062 | 1.135086 | 8.94293  | 0.027765 |
| cg03810428 | 3.185625 | 1.06912  | 9.492113 | 0.037531 |
| cg21114773 | 3.183723 | 1.109109 | 9.138953 | 0.031362 |
| cg20100910 | 3.182009 | 1.212746 | 8.348967 | 0.018679 |
| cg24469980 | 3.181841 | 1.024532 | 9.881696 | 0.045298 |
| cg26059468 | 3.181365 | 1.14751  | 8.820039 | 0.02612  |
| cg24657817 | 3.180466 | 1.076313 | 9.398167 | 0.03635  |
| cg14783814 | 3.179753 | 1.026186 | 9.852825 | 0.044989 |
| cg02467990 | 3.179688 | 1.348792 | 7.495905 | 0.008198 |
| cg06610849 | 3.177937 | 1.176643 | 8.583136 | 0.022558 |
| cg20095233 | 3.176617 | 1.170597 | 8.620298 | 0.023256 |
| cg24863335 | 3.175778 | 1.116538 | 9.032889 | 0.030262 |
| cg20718350 | 3.175259 | 1.152817 | 8.745768 | 0.025413 |
| cg00400832 | 3.172631 | 1.088547 | 9.246815 | 0.034394 |
| cg06159352 | 3.172242 | 1.301205 | 7.733693 | 0.011116 |
| cg14230397 | 3.171575 | 1.078491 | 9.326821 | 0.03597  |
| cg04545136 | 3.171261 | 1.093888 | 9.193715 | 0.033569 |
| cg06558014 | 3.171056 | 1.201739 | 8.367541 | 0.019744 |
| cg24080247 | 3.170133 | 1.269821 | 7.914298 | 0.013447 |



|            |          |          |          |          |
|------------|----------|----------|----------|----------|
| cg15672437 | 3.17002  | 1.131708 | 8.87952  | 0.028135 |
| cg23316253 | 3.169681 | 1.009665 | 9.950705 | 0.048105 |
| cg09618102 | 3.167516 | 1.181447 | 8.492261 | 0.021944 |
| cg23500122 | 3.167021 | 1.154497 | 8.687787 | 0.025156 |
| cg16589299 | 3.16677  | 1.195626 | 8.387597 | 0.020369 |
| cg02587316 | 3.162565 | 1.139516 | 8.777248 | 0.027054 |
| cg27111463 | 3.161277 | 1.008497 | 9.909478 | 0.048327 |
| cg24604013 | 3.160136 | 1.144827 | 8.723119 | 0.026348 |
| cg10649903 | 3.15955  | 1.032016 | 9.673057 | 0.043887 |
| cg00875511 | 3.15939  | 1.000578 | 9.97598  | 0.049885 |
| cg06845853 | 3.159074 | 1.304336 | 7.651212 | 0.010814 |
| cg22702328 | 3.158837 | 1.035672 | 9.634568 | 0.043221 |
| cg17307479 | 3.155672 | 1.08769  | 9.155427 | 0.034461 |
| cg14304469 | 3.154508 | 1.128093 | 8.821011 | 0.028547 |
| cg26437826 | 3.154468 | 1.017455 | 9.779965 | 0.046598 |
| cg10366093 | 3.152093 | 1.078669 | 9.211064 | 0.035872 |
| cg00919971 | 3.150583 | 1.099633 | 9.026809 | 0.032613 |
| cg10601582 | 3.150526 | 1.224799 | 8.104032 | 0.017283 |
| cg09971314 | 3.149816 | 1.188597 | 8.347103 | 0.021031 |
| cg03072621 | 3.149655 | 1.199037 | 8.273576 | 0.019894 |
| cg06660530 | 3.147245 | 1.063952 | 9.309778 | 0.038266 |
| cg27621340 | 3.146293 | 1.080974 | 9.157629 | 0.035483 |
| cg24031355 | 3.145667 | 1.046103 | 9.459126 | 0.04133  |
| cg08053686 | 3.145084 | 1.012812 | 9.766422 | 0.047481 |
| cg10864319 | 3.144791 | 1.297603 | 7.621523 | 0.011188 |
| cg04819499 | 3.144044 | 1.173501 | 8.423522 | 0.022718 |
| cg26777883 | 3.14226  | 1.188334 | 8.308944 | 0.021012 |
| cg23676551 | 3.141554 | 1.205886 | 8.184323 | 0.01912  |
| cg09019936 | 3.140971 | 1.128551 | 8.741917 | 0.028414 |
| cg26116950 | 3.140431 | 1.314364 | 7.50348  | 0.010022 |
| cg12919006 | 3.139022 | 1.276373 | 7.71989  | 0.012722 |
| cg24812837 | 3.138379 | 1.195736 | 8.23712  | 0.020176 |
| cg22920300 | 3.137395 | 1.052638 | 9.351031 | 0.040167 |
| cg21210758 | 3.137288 | 1.210423 | 8.131515 | 0.018624 |
| cg04514249 | 3.137117 | 1.069886 | 9.198651 | 0.037248 |
| cg04293733 | 3.136805 | 1.173838 | 8.382376 | 0.022634 |
| cg11205072 | 3.131651 | 1.341502 | 7.310639 | 0.008311 |
| cg27360326 | 3.131611 | 1.141331 | 8.592592 | 0.026646 |
| cg01245966 | 3.128851 | 1.079164 | 9.071566 | 0.035708 |
| cg01921432 | 3.127292 | 1.235007 | 7.918945 | 0.016162 |
| cg13940693 | 3.126426 | 1.077295 | 9.073219 | 0.036    |
| cg23317501 | 3.124095 | 1.055945 | 9.242875 | 0.039559 |
| cg24978630 | 3.123478 | 1.333959 | 7.313651 | 0.008696 |
| cg24980653 | 3.123223 | 1.297647 | 7.517082 | 0.011041 |
| cg16857858 | 3.122977 | 1.403182 | 6.950623 | 0.005274 |
| cg26705960 | 3.12151  | 1.030626 | 9.454277 | 0.044081 |
| cg19630629 | 3.12099  | 1.016863 | 9.579043 | 0.04668  |
| cg11566394 | 3.119853 | 1.208974 | 8.051031 | 0.018657 |
| cg18063312 | 3.117572 | 1.232074 | 7.888533 | 0.016369 |
| cg15425280 | 3.117507 | 1.111294 | 8.745528 | 0.030736 |
| cg01685883 | 3.117269 | 1.088008 | 8.931339 | 0.034258 |
| cg05484788 | 3.114898 | 1.093743 | 8.870999 | 0.033356 |
| cg25732462 | 3.11258  | 1.161487 | 8.341163 | 0.02397  |
| cg21282549 | 3.112147 | 1.333441 | 7.263506 | 0.008654 |

|            |          |          |          |          |
|------------|----------|----------|----------|----------|
| cg02164046 | 3.111096 | 1.010966 | 9.573932 | 0.047818 |
| cg01610488 | 3.111025 | 1.100693 | 8.793071 | 0.032279 |
| cg10024876 | 3.110766 | 1.008683 | 9.593561 | 0.048267 |
| cg18349911 | 3.110429 | 1.03573  | 9.341015 | 0.043121 |
| cg16391955 | 3.109875 | 1.09458  | 8.835646 | 0.033206 |
| cg04658772 | 3.108966 | 1.072421 | 9.012944 | 0.036733 |
| cg17800654 | 3.108375 | 1.042718 | 9.266162 | 0.041848 |
| cg11659501 | 3.107636 | 1.00254  | 9.63293  | 0.049488 |
| cg14872657 | 3.107368 | 1.027419 | 9.398047 | 0.044657 |
| cg04141813 | 3.10612  | 1.069748 | 9.01893  | 0.037166 |
| cg15564098 | 3.105578 | 1.319027 | 7.311917 | 0.009494 |
| cg08004425 | 3.104997 | 1.238736 | 7.782936 | 0.015666 |
| cg17741501 | 3.104791 | 1.147655 | 8.399498 | 0.025669 |
| cg01482645 | 3.103597 | 1.043268 | 9.232832 | 0.041739 |
| cg17617843 | 3.103339 | 1.042297 | 9.2399   | 0.041913 |
| cg03692651 | 3.102689 | 1.300128 | 7.404409 | 0.01073  |
| cg12453014 | 3.102211 | 1.221578 | 7.878097 | 0.017272 |
| cg04495670 | 3.101793 | 1.26704  | 7.593382 | 0.013208 |
| cg24848035 | 3.100584 | 1.088934 | 8.828475 | 0.034044 |
| cg22891500 | 3.099698 | 1.047119 | 9.175772 | 0.041041 |
| cg04851268 | 3.098483 | 1.146124 | 8.376573 | 0.025831 |
| cg07448060 | 3.098454 | 1.016766 | 9.442112 | 0.046678 |
| cg15585794 | 3.097946 | 1.118085 | 8.583664 | 0.029658 |
| cg17062109 | 3.097822 | 1.093247 | 8.77798  | 0.03336  |
| cg05542338 | 3.096203 | 1.062875 | 9.019377 | 0.038289 |
| cg03994318 | 3.096065 | 1.234132 | 7.767094 | 0.016029 |
| cg20058043 | 3.094048 | 1.23616  | 7.744249 | 0.015827 |
| cg24109980 | 3.093221 | 1.049663 | 9.115323 | 0.040573 |
| cg03181478 | 3.090927 | 1.030568 | 9.270445 | 0.044042 |
| cg09118932 | 3.090085 | 1.082546 | 8.820523 | 0.035016 |
| cg00991875 | 3.089233 | 1.280408 | 7.453375 | 0.012072 |
| cg08708684 | 3.087568 | 1.212436 | 7.862749 | 0.018085 |
| cg18173058 | 3.087557 | 1.099555 | 8.66988  | 0.032345 |
| cg16508480 | 3.086347 | 1.117954 | 8.520512 | 0.029618 |
| cg04599297 | 3.085696 | 1.124852 | 8.464686 | 0.028635 |
| cg17586860 | 3.084727 | 1.015753 | 9.367963 | 0.046862 |
| cg14442421 | 3.084359 | 1.034616 | 9.194974 | 0.043277 |
| cg13611347 | 3.084041 | 1.015978 | 9.361729 | 0.046818 |
| cg19109538 | 3.081899 | 1.181061 | 8.042006 | 0.021447 |
| cg22557091 | 3.081023 | 1.030246 | 9.214021 | 0.044086 |
| cg00181125 | 3.080849 | 1.046847 | 9.066876 | 0.041043 |
| cg21383810 | 3.080321 | 1.382838 | 6.861526 | 0.005902 |
| cg03602280 | 3.079872 | 1.175681 | 8.068187 | 0.022059 |
| cg24946597 | 3.079512 | 1.266133 | 7.490047 | 0.013127 |
| cg22717014 | 3.077922 | 1.099623 | 8.615316 | 0.03229  |
| cg00582524 | 3.076931 | 1.146904 | 8.254832 | 0.025603 |
| cg07926691 | 3.076559 | 1.177361 | 8.03935  | 0.021841 |
| cg11311843 | 3.076194 | 1.209517 | 7.823759 | 0.018306 |
| cg03985727 | 3.075964 | 1.269124 | 7.455183 | 0.012861 |
| cg21511365 | 3.075722 | 1.104897 | 8.561939 | 0.031482 |
| cg24425021 | 3.075135 | 1.011233 | 9.351413 | 0.047743 |
| cg20800509 | 3.075125 | 1.408179 | 6.715334 | 0.004818 |
| cg03063639 | 3.074298 | 1.276033 | 7.406789 | 0.012305 |
| cg18652346 | 3.074134 | 1.115713 | 8.470191 | 0.029878 |

|            |          |          |          |          |
|------------|----------|----------|----------|----------|
| cg03847373 | 3.073485 | 1.065587 | 8.864892 | 0.037755 |
| cg05994094 | 3.073345 | 1.159184 | 8.148363 | 0.024015 |
| cg08721908 | 3.07308  | 1.202698 | 7.852194 | 0.018998 |
| cg15031661 | 3.073068 | 1.36452  | 6.920928 | 0.006723 |
| cg24416513 | 3.072304 | 1.304268 | 7.237047 | 0.010239 |
| cg02943578 | 3.070838 | 1.020127 | 9.243996 | 0.045999 |
| cg01405040 | 3.070416 | 1.175983 | 8.016661 | 0.021962 |
| cg05471296 | 3.070128 | 1.194842 | 7.888642 | 0.019823 |
| cg05576262 | 3.069629 | 1.08865  | 8.655327 | 0.033959 |
| cg08711858 | 3.068697 | 1.213938 | 7.757315 | 0.017803 |
| cg23348270 | 3.064666 | 1.071177 | 8.768091 | 0.036783 |
| cg18328894 | 3.062509 | 1.239079 | 7.5693   | 0.015338 |
| cg12892506 | 3.062184 | 1.21743  | 7.702271 | 0.017406 |
| cg04389897 | 3.06137  | 1.340812 | 6.989785 | 0.007903 |
| cg17087479 | 3.061354 | 1.216809 | 7.702023 | 0.017462 |
| cg20978694 | 3.061069 | 1.200935 | 7.802371 | 0.019103 |
| cg04543008 | 3.060518 | 1.073579 | 8.724807 | 0.036367 |
| cg22809871 | 3.060122 | 1.194343 | 7.840581 | 0.01981  |
| cg00618450 | 3.060068 | 1.052791 | 8.894471 | 0.039931 |
| cg15301316 | 3.058395 | 1.088477 | 8.593451 | 0.033938 |
| cg04970570 | 3.057144 | 1.348595 | 6.930275 | 0.007447 |
| cg00355281 | 3.056201 | 1.05335  | 8.867294 | 0.039821 |
| cg14750277 | 3.055317 | 1.130459 | 8.25767  | 0.027687 |
| cg23318063 | 3.054828 | 1.115487 | 8.36583  | 0.029811 |
| cg05369857 | 3.052281 | 1.402741 | 6.641581 | 0.004906 |
| cg27403635 | 3.052043 | 1.218744 | 7.64309  | 0.017204 |
| cg14394692 | 3.051261 | 1.082735 | 8.598776 | 0.034829 |
| cg26091021 | 3.051248 | 1.121414 | 8.302119 | 0.028937 |
| cg02081266 | 3.050582 | 1.104821 | 8.423132 | 0.031371 |
| cg02631468 | 3.050255 | 1.162985 | 8.000153 | 0.023398 |
| cg13923530 | 3.050069 | 1.065129 | 8.734079 | 0.037755 |
| cg14123923 | 3.049469 | 1.239069 | 7.505039 | 0.015247 |
| cg07009376 | 3.047873 | 1.186274 | 7.830844 | 0.020626 |
| cg17398252 | 3.047274 | 1.251575 | 7.419357 | 0.014119 |
| cg03697918 | 3.046354 | 1.084945 | 8.553686 | 0.034452 |
| cg12751432 | 3.045739 | 1.103977 | 8.402823 | 0.031475 |
| cg01942962 | 3.045603 | 1.14276  | 8.116925 | 0.025962 |
| cg03450948 | 3.045327 | 1.183683 | 7.834886 | 0.020904 |
| cg23736843 | 3.044736 | 1.271264 | 7.292284 | 0.01247  |
| cg15347189 | 3.044039 | 1.038727 | 8.920704 | 0.042435 |
| cg03053579 | 3.042995 | 1.005132 | 9.212538 | 0.048951 |
| cg27058486 | 3.042394 | 1.0375   | 8.921602 | 0.042659 |
| cg23684973 | 3.039363 | 1.14672  | 8.055782 | 0.025401 |
| cg23989821 | 3.039325 | 1.354448 | 6.820119 | 0.007024 |
| cg05398903 | 3.038519 | 1.288356 | 7.166186 | 0.011125 |
| cg21230745 | 3.037893 | 1.145345 | 8.057654 | 0.025573 |
| cg00609966 | 3.037518 | 1.03304  | 8.931421 | 0.043484 |
| cg27655158 | 3.037508 | 1.166185 | 7.911659 | 0.022922 |
| cg25623768 | 3.033979 | 1.200207 | 7.669535 | 0.018994 |
| cg18856581 | 3.033957 | 1.209386 | 7.611213 | 0.018026 |
| cg23916167 | 3.03251  | 1.029149 | 8.935653 | 0.044212 |
| cg22784954 | 3.029825 | 1.323979 | 6.933525 | 0.008681 |
| cg04773818 | 3.028113 | 1.04733  | 8.755089 | 0.040822 |
| cg24408656 | 3.027614 | 1.036646 | 8.842413 | 0.042787 |

|            |          |          |          |          |
|------------|----------|----------|----------|----------|
| cg21039708 | 3.027039 | 1.356464 | 6.755034 | 0.006843 |
| cg05143887 | 3.02684  | 1.081947 | 8.467844 | 0.034857 |
| cg02155398 | 3.026689 | 1.12122  | 8.170431 | 0.028831 |
| cg04961466 | 3.025144 | 1.025833 | 8.921045 | 0.044836 |
| cg14011639 | 3.024962 | 1.117156 | 8.190789 | 0.02941  |
| cg18324707 | 3.023982 | 1.16303  | 7.86262  | 0.023223 |
| cg11571585 | 3.022814 | 1.019965 | 8.958553 | 0.045975 |
| cg27041794 | 3.020896 | 1.005594 | 9.075048 | 0.048849 |
| cg19619405 | 3.020789 | 1.335044 | 6.835104 | 0.007965 |
| cg03764518 | 3.019526 | 1.050504 | 8.679198 | 0.040226 |
| cg07636117 | 3.019397 | 1.069576 | 8.523708 | 0.036889 |
| cg25247290 | 3.018911 | 1.19339  | 7.63692  | 0.019631 |
| cg11016563 | 3.01781  | 1.10226  | 8.262278 | 0.0316   |
| cg02583633 | 3.01702  | 1.055265 | 8.625709 | 0.039367 |
| cg09321400 | 3.016403 | 1.057532 | 8.603698 | 0.038964 |
| cg23294090 | 3.016188 | 1.093608 | 8.318696 | 0.032938 |
| cg19267596 | 3.016075 | 1.000364 | 9.093396 | 0.049924 |
| cg15611413 | 3.015878 | 1.099244 | 8.274343 | 0.032056 |
| cg02463418 | 3.014221 | 1.225294 | 7.414981 | 0.01629  |
| cg08499046 | 3.012963 | 1.112896 | 8.157043 | 0.029972 |
| cg15929698 | 3.012428 | 1.027005 | 8.83611  | 0.044591 |
| cg26530498 | 3.011862 | 1.002949 | 9.044638 | 0.04939  |
| cg02387803 | 3.011314 | 1.140254 | 7.95263  | 0.026091 |
| cg01500945 | 3.011051 | 1.26393  | 7.173208 | 0.012817 |
| cg05349062 | 3.010485 | 1.086657 | 8.340281 | 0.034022 |
| cg08149193 | 3.010087 | 1.259972 | 7.191133 | 0.013137 |
| cg12973591 | 3.009966 | 1.246635 | 7.26748  | 0.014281 |
| cg10168149 | 3.009235 | 1.17436  | 7.711003 | 0.021748 |
| cg00017221 | 3.009199 | 1.207371 | 7.5      | 0.018059 |
| cg18722841 | 3.009191 | 1.004103 | 9.01823  | 0.049151 |
| cg19875547 | 3.007971 | 1.151393 | 7.858211 | 0.024596 |
| cg07411620 | 3.007553 | 1.212369 | 7.460911 | 0.01753  |
| cg23632875 | 3.007274 | 1.196751 | 7.556875 | 0.01918  |
| cg15949044 | 3.006201 | 1.142375 | 7.910931 | 0.025774 |
| cg15228928 | 3.004733 | 1.047607 | 8.618137 | 0.04071  |
| cg26476852 | 3.004317 | 1.074053 | 8.403606 | 0.036074 |
| cg19714279 | 3.003379 | 1.049939 | 8.591246 | 0.040282 |
| cg03020554 | 3.002906 | 1.012858 | 8.902969 | 0.047367 |
| cg11389172 | 3.000475 | 1.007622 | 8.934749 | 0.048427 |
| cg01851378 | 3.000274 | 1.133092 | 7.944315 | 0.027004 |
| cg24663256 | 2.999702 | 1.036514 | 8.681229 | 0.042754 |
| cg25683325 | 2.999697 | 1.097047 | 8.202183 | 0.032319 |
| cg22660578 | 2.999682 | 1.00066  | 8.992161 | 0.049863 |
| cg01775414 | 2.997323 | 1.107436 | 8.112379 | 0.030707 |
| cg15621260 | 2.997071 | 1.089225 | 8.24663  | 0.033548 |
| cg09851951 | 2.996153 | 1.0721   | 8.373227 | 0.036373 |
| cg24724633 | 2.995283 | 1.277457 | 7.02311  | 0.01163  |
| cg04398581 | 2.994398 | 1.213379 | 7.389624 | 0.017331 |
| cg00290506 | 2.993886 | 1.002231 | 8.943396 | 0.049535 |
| cg15051226 | 2.993604 | 1.075813 | 8.330127 | 0.035736 |
| cg13163930 | 2.992587 | 1.1897   | 7.52759  | 0.019857 |
| cg17400476 | 2.99186  | 1.280112 | 6.992534 | 0.011403 |
| cg24610236 | 2.990388 | 1.263925 | 7.075116 | 0.012666 |
| cg15594205 | 2.990314 | 1.26417  | 7.073399 | 0.012645 |

|            |          |          |          |          |
|------------|----------|----------|----------|----------|
| cg06401021 | 2.989733 | 1.337972 | 6.680637 | 0.007592 |
| cg12926938 | 2.989647 | 1.183729 | 7.55071  | 0.020516 |
| cg12602633 | 2.988883 | 1.124948 | 7.941188 | 0.028084 |
| cg24524352 | 2.986579 | 1.08376  | 8.230287 | 0.034388 |
| cg06183338 | 2.985778 | 1.07929  | 8.259935 | 0.035123 |
| cg02253760 | 2.982351 | 1.345665 | 6.609683 | 0.007121 |
| cg18249173 | 2.981323 | 1.094736 | 8.119114 | 0.032595 |
| cg21161253 | 2.980272 | 1.097665 | 8.091743 | 0.032128 |
| cg00549566 | 2.980044 | 1.155731 | 7.684025 | 0.023856 |
| cg25778535 | 2.977711 | 1.074781 | 8.249832 | 0.035846 |
| cg24911113 | 2.977608 | 1.034574 | 8.569854 | 0.043075 |
| cg24280540 | 2.976117 | 1.11332  | 7.955725 | 0.02971  |
| cg18627360 | 2.97571  | 1.121957 | 7.892328 | 0.028438 |
| cg19923650 | 2.974133 | 1.040388 | 8.502083 | 0.041967 |
| cg17218713 | 2.973431 | 1.178571 | 7.501707 | 0.021002 |
| cg26667946 | 2.97215  | 1.25429  | 7.042769 | 0.013335 |
| cg11985360 | 2.971894 | 1.068601 | 8.265153 | 0.036879 |
| cg01570424 | 2.971115 | 1.105906 | 7.982165 | 0.030803 |
| cg03243226 | 2.971056 | 1.173092 | 7.524707 | 0.021637 |
| cg01743841 | 2.970929 | 1.212447 | 7.279839 | 0.017254 |
| cg03679755 | 2.970799 | 1.190184 | 7.415367 | 0.019647 |
| cg01181415 | 2.970009 | 1.221245 | 7.222919 | 0.016361 |
| cg17290701 | 2.9691   | 1.169533 | 7.537673 | 0.022055 |
| cg11873482 | 2.968642 | 1.23882  | 7.113897 | 0.014677 |
| cg26328510 | 2.968481 | 1.215327 | 7.250625 | 0.016942 |
| cg07401230 | 2.966002 | 1.133961 | 7.757914 | 0.026676 |
| cg08236767 | 2.965002 | 1.305242 | 6.73533  | 0.009423 |
| cg00661970 | 2.964964 | 1.284785 | 6.842396 | 0.010857 |
| cg05438320 | 2.964884 | 1.064137 | 8.260724 | 0.037629 |
| cg02315940 | 2.964502 | 1.132674 | 7.758872 | 0.026846 |
| cg16896847 | 2.963956 | 1.19059  | 7.378722 | 0.019552 |
| cg08151857 | 2.96349  | 1.219662 | 7.200581 | 0.016469 |
| cg17448335 | 2.962433 | 1.001812 | 8.760135 | 0.049619 |
| cg19679633 | 2.960349 | 1.218613 | 7.191506 | 0.01655  |
| cg05694245 | 2.958981 | 1.081126 | 8.098566 | 0.034703 |
| cg05783139 | 2.958728 | 1.094487 | 7.998331 | 0.032525 |
| cg16415870 | 2.955404 | 1.041435 | 8.386899 | 0.041725 |
| cg06410057 | 2.954076 | 1.028917 | 8.481309 | 0.044121 |
| cg08287265 | 2.953894 | 1.138708 | 7.662625 | 0.025944 |
| cg15508809 | 2.953701 | 1.023119 | 8.527207 | 0.045261 |
| cg21277995 | 2.9532   | 1.262417 | 6.908484 | 0.012512 |
| cg00295794 | 2.952853 | 1.21958  | 7.149465 | 0.016397 |
| cg07180307 | 2.950993 | 1.106408 | 7.870839 | 0.030619 |
| cg08448589 | 2.950592 | 1.05457  | 8.25549  | 0.039286 |
| cg15775138 | 2.950468 | 1.085302 | 8.021048 | 0.033973 |
| cg03782202 | 2.949339 | 1.008104 | 8.628676 | 0.048302 |
| cg04150495 | 2.948806 | 1.196759 | 7.265833 | 0.018756 |
| cg25875213 | 2.948441 | 1.161197 | 7.4865   | 0.022947 |
| cg03225817 | 2.945132 | 1.138662 | 7.617537 | 0.025895 |
| cg03483150 | 2.943192 | 1.023878 | 8.460362 | 0.045095 |
| cg11755405 | 2.943056 | 1.077523 | 8.038413 | 0.035238 |
| cg25963041 | 2.94151  | 1.267986 | 6.823797 | 0.011972 |
| cg03585912 | 2.939781 | 1.023119 | 8.447021 | 0.045241 |
| cg05223720 | 2.939063 | 1.082617 | 7.978894 | 0.034366 |

|            |          |          |          |          |
|------------|----------|----------|----------|----------|
| cg18106312 | 2.937952 | 1.147112 | 7.524604 | 0.024704 |
| cg24346905 | 2.937634 | 1.066562 | 8.091134 | 0.037103 |
| cg22758454 | 2.937263 | 1.036537 | 8.323403 | 0.042612 |
| cg05495949 | 2.936739 | 1.012896 | 8.514625 | 0.047305 |
| cg16007456 | 2.935599 | 1.132733 | 7.607922 | 0.026659 |
| cg05513806 | 2.935028 | 1.127433 | 7.640708 | 0.027407 |
| cg22531183 | 2.934373 | 1.236641 | 6.962849 | 0.014617 |
| cg14118515 | 2.932791 | 1.398704 | 6.149453 | 0.004397 |
| cg02681173 | 2.932088 | 1.045354 | 8.224145 | 0.040928 |
| cg01893212 | 2.928982 | 1.322501 | 6.486907 | 0.008074 |
| cg23827572 | 2.927572 | 1.172826 | 7.307717 | 0.021362 |
| cg03595755 | 2.927411 | 1.033981 | 8.288099 | 0.043084 |
| cg23891360 | 2.926671 | 1.176911 | 7.277866 | 0.020864 |
| cg24761507 | 2.925799 | 1.29211  | 6.625054 | 0.010037 |
| cg05525743 | 2.925588 | 1.13577  | 7.535915 | 0.02617  |
| cg25266629 | 2.924635 | 1.163006 | 7.354636 | 0.022553 |
| cg27298506 | 2.922791 | 1.007224 | 8.481432 | 0.048472 |
| cg18582824 | 2.921011 | 1.052647 | 8.105573 | 0.039543 |
| cg19001226 | 2.920086 | 1.20974  | 7.048538 | 0.017151 |
| cg14861089 | 2.919755 | 1.389488 | 6.135334 | 0.004681 |
| cg02970836 | 2.919484 | 1.185764 | 7.188099 | 0.019774 |
| cg21322436 | 2.919317 | 1.142271 | 7.460935 | 0.025233 |
| cg05593641 | 2.917716 | 1.084744 | 7.847998 | 0.033914 |
| cg13879483 | 2.916581 | 1.40441  | 6.056953 | 0.004094 |
| cg26858704 | 2.916354 | 1.0953   | 7.76511  | 0.032182 |
| cg15873149 | 2.915897 | 1.109238 | 7.66513  | 0.029991 |
| cg26649384 | 2.913769 | 1.171198 | 7.249032 | 0.02146  |
| cg16234557 | 2.91375  | 1.242323 | 6.83392  | 0.013938 |
| cg21484228 | 2.913676 | 1.055669 | 8.041827 | 0.038966 |
| cg25984671 | 2.912481 | 1.081491 | 7.843381 | 0.034434 |
| cg04904331 | 2.912254 | 1.301717 | 6.51541  | 0.009274 |
| cg08602190 | 2.911531 | 1.070296 | 7.920253 | 0.036348 |
| cg05167251 | 2.909967 | 1.027692 | 8.239732 | 0.044283 |
| cg26162582 | 2.907436 | 1.260376 | 6.706875 | 0.012329 |
| cg00690148 | 2.906746 | 1.089537 | 7.754825 | 0.033069 |
| cg25051341 | 2.904278 | 1.107432 | 7.616568 | 0.030204 |
| cg17787134 | 2.902892 | 1.174994 | 7.171764 | 0.02092  |
| cg15562220 | 2.902769 | 1.132037 | 7.443277 | 0.026548 |
| cg20312205 | 2.902758 | 1.09357  | 7.705045 | 0.032391 |
| cg01995743 | 2.902166 | 1.118186 | 7.532349 | 0.028559 |
| cg23881278 | 2.9004   | 1.13837  | 7.389794 | 0.025644 |
| cg09354309 | 2.899997 | 1.131743 | 7.430995 | 0.026572 |
| cg20099830 | 2.899348 | 1.023726 | 8.211394 | 0.045058 |
| cg07676859 | 2.898829 | 1.137519 | 7.387318 | 0.025752 |
| cg20185017 | 2.898204 | 1.114046 | 7.539708 | 0.029157 |
| cg05161082 | 2.896867 | 1.096024 | 7.656617 | 0.031964 |
| cg10196720 | 2.896491 | 1.203521 | 6.970926 | 0.017626 |
| cg10358981 | 2.893833 | 1.109418 | 7.548349 | 0.029838 |
| cg26354128 | 2.893081 | 1.258313 | 6.651701 | 0.012388 |
| cg21200408 | 2.892516 | 1.238237 | 6.756906 | 0.014143 |
| cg04541368 | 2.892383 | 1.229713 | 6.803119 | 0.014941 |
| cg00765783 | 2.891249 | 1.145645 | 7.296608 | 0.024586 |
| cg04574459 | 2.890218 | 1.085419 | 7.695977 | 0.03367  |
| cg02623991 | 2.890017 | 1.179482 | 7.081246 | 0.020288 |

|            |          |          |          |          |
|------------|----------|----------|----------|----------|
| cg27319123 | 2.889956 | 1.14215  | 7.312389 | 0.025053 |
| cg27291304 | 2.889508 | 1.025286 | 8.143347 | 0.044728 |
| cg14872952 | 2.887278 | 1.050993 | 7.931907 | 0.039742 |
| cg07651242 | 2.887091 | 1.012465 | 8.232677 | 0.047352 |
| cg06338562 | 2.887047 | 1.113187 | 7.487546 | 0.029221 |
| cg07849944 | 2.886421 | 1.050066 | 7.934198 | 0.039912 |
| cg11717507 | 2.885837 | 1.037641 | 8.025953 | 0.042279 |
| cg10636403 | 2.885817 | 1.185811 | 7.022991 | 0.019515 |
| cg24226973 | 2.885638 | 1.018484 | 8.17579  | 0.046105 |
| cg17300736 | 2.882896 | 1.124177 | 7.393041 | 0.027554 |
| cg01615424 | 2.882646 | 1.060451 | 7.835958 | 0.037986 |
| cg21097881 | 2.882398 | 1.091846 | 7.609328 | 0.032568 |
| cg10520887 | 2.881359 | 1.041925 | 7.968164 | 0.04144  |
| cg12118843 | 2.878943 | 1.103156 | 7.51327  | 0.030729 |
| cg08276289 | 2.878812 | 1.044118 | 7.937376 | 0.041013 |
| cg14073722 | 2.878805 | 1.055376 | 7.852672 | 0.038901 |
| cg13222752 | 2.878744 | 1.147541 | 7.221674 | 0.024244 |
| cg24005685 | 2.876732 | 1.164064 | 7.109223 | 0.022075 |
| cg21587238 | 2.876576 | 1.091124 | 7.583637 | 0.032656 |
| cg14817655 | 2.875477 | 1.049941 | 7.875077 | 0.039901 |
| cg27443071 | 2.873061 | 1.008062 | 8.188464 | 0.048269 |
| cg05575614 | 2.872844 | 1.156006 | 7.139437 | 0.023081 |
| cg12374721 | 2.869453 | 1.247844 | 6.59839  | 0.013097 |
| cg07746943 | 2.869096 | 1.121767 | 7.338162 | 0.027822 |
| cg25340966 | 2.868229 | 1.169709 | 7.03315  | 0.021307 |
| cg22572159 | 2.867927 | 1.123594 | 7.320265 | 0.027545 |
| cg13252583 | 2.866876 | 1.08074  | 7.604951 | 0.034348 |
| cg00903099 | 2.866384 | 1.008682 | 8.145441 | 0.048134 |
| cg03278146 | 2.864989 | 1.253905 | 6.546082 | 0.012537 |
| cg12477716 | 2.863342 | 1.160808 | 7.062948 | 0.022391 |
| cg07124117 | 2.86285  | 1.02599  | 7.988298 | 0.04454  |
| cg14667871 | 2.860977 | 1.037867 | 7.886552 | 0.042173 |
| cg17045801 | 2.860109 | 1.067454 | 7.663299 | 0.036638 |
| cg07068756 | 2.859957 | 1.142842 | 7.15703  | 0.024752 |
| cg10293925 | 2.859957 | 1.126499 | 7.260864 | 0.027068 |
| cg00334063 | 2.858958 | 1.215214 | 6.726095 | 0.016106 |
| cg10300684 | 2.858495 | 1.147005 | 7.123764 | 0.024174 |
| cg06008912 | 2.857029 | 1.114191 | 7.326045 | 0.028887 |
| cg01708273 | 2.855727 | 1.068682 | 7.631062 | 0.036401 |
| cg11841394 | 2.854388 | 1.041413 | 7.823535 | 0.041466 |
| cg10811045 | 2.851979 | 1.312746 | 6.196006 | 0.008112 |
| cg01581084 | 2.851571 | 1.094412 | 7.429978 | 0.031984 |
| cg15662768 | 2.850068 | 1.126482 | 7.210844 | 0.027005 |
| cg04763554 | 2.849852 | 1.211008 | 6.706526 | 0.016466 |
| cg17926940 | 2.849852 | 1.055119 | 7.697387 | 0.038848 |
| cg05663341 | 2.848106 | 1.324215 | 6.125673 | 0.007392 |
| cg06808751 | 2.84712  | 1.030771 | 7.864107 | 0.043547 |
| cg26567423 | 2.846563 | 1.067268 | 7.592206 | 0.036615 |
| cg10397765 | 2.845764 | 1.15846  | 6.990636 | 0.022564 |
| cg17059658 | 2.844728 | 1.139911 | 7.099215 | 0.025051 |
| cg16783279 | 2.844228 | 1.064894 | 7.596653 | 0.037033 |
| cg08361126 | 2.8434   | 1.031248 | 7.839944 | 0.043443 |
| cg09754845 | 2.842032 | 1.000032 | 8.076883 | 0.049993 |
| cg19063061 | 2.841825 | 1.103147 | 7.320846 | 0.030519 |

|            |          |          |          |          |
|------------|----------|----------|----------|----------|
| cg16426537 | 2.840542 | 1.006035 | 8.02028  | 0.048687 |
| cg11642106 | 2.840333 | 1.116942 | 7.222837 | 0.028364 |
| cg00287312 | 2.83945  | 1.017661 | 7.922552 | 0.046217 |
| cg10384245 | 2.835991 | 1.001683 | 8.029331 | 0.049631 |
| cg07918545 | 2.834505 | 1.064003 | 7.551128 | 0.037155 |
| cg07573209 | 2.834421 | 1.103684 | 7.279208 | 0.03039  |
| cg00904966 | 2.833952 | 1.294942 | 6.202042 | 0.00914  |
| cg19098763 | 2.832326 | 1.088531 | 7.369629 | 0.032857 |
| cg05241461 | 2.832272 | 1.053057 | 7.617598 | 0.039172 |
| cg06187770 | 2.831613 | 1.00562  | 7.973221 | 0.048773 |
| cg22759823 | 2.82959  | 1.160186 | 6.901116 | 0.022219 |
| cg27136844 | 2.829233 | 1.04113  | 7.688341 | 0.041451 |
| cg03227184 | 2.828269 | 1.054965 | 7.582342 | 0.038799 |
| cg07150062 | 2.828011 | 1.102836 | 7.251892 | 0.030488 |
| cg25636665 | 2.825323 | 1.107361 | 7.208534 | 0.029753 |
| cg18229521 | 2.821435 | 1.04941  | 7.585687 | 0.039827 |
| cg12824796 | 2.821027 | 1.207232 | 6.592096 | 0.016627 |
| cg00040312 | 2.82054  | 1.117228 | 7.1207   | 0.028195 |
| cg18406033 | 2.817298 | 1.036704 | 7.656154 | 0.042292 |
| cg19945554 | 2.809581 | 1.066397 | 7.402262 | 0.036616 |
| cg15393937 | 2.808902 | 1.056259 | 7.469692 | 0.038486 |
| cg16206460 | 2.808016 | 1.183668 | 6.661454 | 0.019153 |
| cg04317962 | 2.807742 | 1.059595 | 7.440028 | 0.037858 |
| cg21426003 | 2.807371 | 1.119191 | 7.041989 | 0.02781  |
| cg21319323 | 2.806417 | 1.007056 | 7.82079  | 0.048449 |
| cg15808943 | 2.805548 | 1.072598 | 7.338352 | 0.035481 |
| cg22797031 | 2.804625 | 1.170049 | 6.722729 | 0.020775 |
| cg03943218 | 2.804607 | 1.105662 | 7.114127 | 0.029896 |
| cg13128937 | 2.803707 | 1.007191 | 7.804647 | 0.048418 |
| cg08146483 | 2.802999 | 1.130942 | 6.947134 | 0.026036 |
| cg17302155 | 2.802231 | 1.049837 | 7.479733 | 0.039681 |
| cg02478448 | 2.801435 | 1.157556 | 6.779831 | 0.022347 |
| cg08534653 | 2.800716 | 1.080714 | 7.258169 | 0.034029 |
| cg06274159 | 2.798259 | 1.179557 | 6.638297 | 0.019562 |
| cg07302069 | 2.797464 | 1.347156 | 5.809131 | 0.005793 |
| cg18009496 | 2.79717  | 1.011249 | 7.737126 | 0.047534 |
| cg19579167 | 2.794826 | 1.06559  | 7.330265 | 0.036699 |
| cg10143811 | 2.792771 | 1.327126 | 5.877037 | 0.00682  |
| cg11668923 | 2.79223  | 1.000987 | 7.788857 | 0.04978  |
| cg13314145 | 2.788203 | 1.033357 | 7.523124 | 0.042892 |
| cg26595278 | 2.78738  | 1.058028 | 7.343364 | 0.038071 |
| cg00548708 | 2.786818 | 1.031288 | 7.530732 | 0.04331  |
| cg16024950 | 2.786177 | 1.269177 | 6.116391 | 0.010645 |
| cg19406736 | 2.784573 | 1.008356 | 7.689593 | 0.048152 |
| cg10362591 | 2.784053 | 1.026615 | 7.55001  | 0.044266 |
| cg20340508 | 2.784046 | 1.133601 | 6.837429 | 0.025516 |
| cg10364040 | 2.783938 | 1.092367 | 7.094971 | 0.031948 |
| cg04556126 | 2.783616 | 1.060197 | 7.308562 | 0.037649 |
| cg13142700 | 2.783094 | 1.160857 | 6.672323 | 0.021773 |
| cg07972135 | 2.782864 | 1.105533 | 7.00507  | 0.029783 |
| cg01672943 | 2.782293 | 1.11216  | 6.960469 | 0.028729 |
| cg10863741 | 2.775933 | 1.028664 | 7.491081 | 0.043825 |
| cg04059773 | 2.775751 | 1.048205 | 7.35046  | 0.039906 |
| cg15042811 | 2.775693 | 1.043413 | 7.383917 | 0.040846 |



|            |          |          |          |          |
|------------|----------|----------|----------|----------|
| cg01047586 | 2.774144 | 1.014787 | 7.583731 | 0.046748 |
| cg14038391 | 2.772902 | 1.065796 | 7.214314 | 0.036566 |
| cg25915838 | 2.768087 | 1.046402 | 7.322526 | 0.040233 |
| cg07080358 | 2.767056 | 1.10848  | 6.907294 | 0.029211 |
| cg23895340 | 2.765847 | 1.017736 | 7.516599 | 0.046105 |
| cg24680632 | 2.765335 | 1.063114 | 7.193092 | 0.037029 |
| cg12997720 | 2.765232 | 1.061146 | 7.2059   | 0.037396 |
| cg01705052 | 2.764108 | 1.134592 | 6.733954 | 0.025227 |
| cg26132774 | 2.763815 | 1.178318 | 6.482691 | 0.019429 |
| cg10922935 | 2.763267 | 1.129367 | 6.760996 | 0.025984 |
| cg01618130 | 2.763091 | 1.006867 | 7.582598 | 0.048467 |
| cg27347269 | 2.762248 | 1.090303 | 6.99807  | 0.032174 |
| cg20398486 | 2.759931 | 1.006779 | 7.565934 | 0.048485 |
| cg01873311 | 2.75975  | 1.008587 | 7.551374 | 0.048085 |
| cg07142797 | 2.759151 | 1.052246 | 7.234918 | 0.039064 |
| cg08893692 | 2.758272 | 1.055976 | 7.204767 | 0.038345 |
| cg18348647 | 2.756168 | 1.131759 | 6.712081 | 0.025581 |
| cg02345991 | 2.754774 | 1.019037 | 7.447009 | 0.045811 |
| cg16301890 | 2.7523   | 1.095752 | 6.913205 | 0.031196 |
| cg09907936 | 2.751475 | 1.11216  | 6.807128 | 0.028526 |
| cg10507508 | 2.749988 | 1.024981 | 7.378121 | 0.044541 |
| cg27467929 | 2.749701 | 1.064083 | 7.105514 | 0.03678  |
| cg12506930 | 2.74905  | 1.024957 | 7.373262 | 0.044544 |
| cg13242070 | 2.746672 | 1.004063 | 7.51368  | 0.049084 |
| cg09513990 | 2.745318 | 1.076816 | 6.999127 | 0.034434 |
| cg15679813 | 2.743202 | 1.239435 | 6.071442 | 0.012792 |
| cg22001496 | 2.741223 | 1.215504 | 6.182047 | 0.015086 |
| cg25640822 | 2.74084  | 1.079123 | 6.961398 | 0.033999 |
| cg16370491 | 2.739496 | 1.014979 | 7.394083 | 0.046667 |
| cg26410450 | 2.736789 | 1.013991 | 7.386668 | 0.046879 |
| cg24569447 | 2.736523 | 1.095742 | 6.834239 | 0.031103 |
| cg19803052 | 2.73512  | 1.073483 | 6.968792 | 0.034982 |
| cg07197785 | 2.73444  | 1.04508  | 7.154635 | 0.040383 |
| cg23089825 | 2.733316 | 1.057387 | 7.065546 | 0.037975 |
| cg18070676 | 2.732379 | 1.053591 | 7.086146 | 0.038703 |
| cg01287975 | 2.730579 | 1.013044 | 7.360057 | 0.04708  |
| cg15603568 | 2.729644 | 1.174735 | 6.342672 | 0.019579 |
| cg05571581 | 2.727926 | 1.04161  | 7.144304 | 0.041057 |
| cg22861116 | 2.726337 | 1.113826 | 6.673315 | 0.028092 |
| cg14669274 | 2.725011 | 1.047365 | 7.089872 | 0.039896 |
| cg18034737 | 2.724652 | 1.058855 | 7.011095 | 0.037658 |
| cg15175143 | 2.724339 | 1.023045 | 7.254834 | 0.044904 |
| cg23797411 | 2.724127 | 1.114624 | 6.657733 | 0.027951 |
| cg14510812 | 2.723107 | 1.020259 | 7.268073 | 0.0455   |
| cg17840719 | 2.721136 | 1.027109 | 7.209148 | 0.044033 |
| cg00778995 | 2.72013  | 1.146241 | 6.455107 | 0.023237 |
| cg04184232 | 2.714937 | 1.056018 | 6.979888 | 0.038163 |
| cg19147218 | 2.71368  | 1.177123 | 6.255979 | 0.019148 |
| cg06288251 | 2.707065 | 1.07066  | 6.844563 | 0.035359 |
| cg13445796 | 2.706771 | 1.161589 | 6.307406 | 0.021055 |
| cg04431946 | 2.705855 | 1.110161 | 6.595126 | 0.028534 |
| cg10188823 | 2.704151 | 1.104788 | 6.618854 | 0.029394 |
| cg04370314 | 2.703479 | 1.02215  | 7.150411 | 0.045058 |
| cg19570244 | 2.703121 | 1.014362 | 7.203408 | 0.046759 |

|            |          |          |          |          |
|------------|----------|----------|----------|----------|
| cg02230017 | 2.702708 | 1.004096 | 7.274834 | 0.049062 |
| cg01670677 | 2.700532 | 1.026226 | 7.106498 | 0.044177 |
| cg05196969 | 2.69895  | 1.05579  | 6.899414 | 0.038141 |
| cg01070209 | 2.698491 | 1.000772 | 7.276236 | 0.049822 |
| cg05475524 | 2.698253 | 1.050759 | 6.928869 | 0.039126 |
| cg11891393 | 2.696374 | 1.105013 | 6.579498 | 0.029305 |
| cg00516513 | 2.696331 | 1.044512 | 6.960382 | 0.040367 |
| cg23121993 | 2.695336 | 1.159297 | 6.266588 | 0.02126  |
| cg09238180 | 2.692782 | 1.067015 | 6.795666 | 0.035967 |
| cg05099387 | 2.691103 | 1.092563 | 6.628482 | 0.031362 |
| cg04454951 | 2.688708 | 1.074574 | 6.727456 | 0.034544 |
| cg04846243 | 2.686136 | 1.011123 | 7.135952 | 0.047462 |
| cg21158633 | 2.685463 | 1.197488 | 6.02237  | 0.016515 |
| cg24934400 | 2.681871 | 1.117161 | 6.438133 | 0.027249 |
| cg26860935 | 2.680721 | 1.038704 | 6.918492 | 0.041504 |
| cg26236177 | 2.677889 | 1.032976 | 6.942166 | 0.042691 |
| cg17459204 | 2.677448 | 1.090858 | 6.571641 | 0.031572 |
| cg19461621 | 2.677406 | 1.004925 | 7.133368 | 0.048862 |
| cg14324370 | 2.677067 | 1.019154 | 7.031992 | 0.045666 |
| cg20945566 | 2.676334 | 1.191454 | 6.011779 | 0.017116 |
| cg25084878 | 2.675888 | 1.017544 | 7.036919 | 0.046019 |
| cg10528576 | 2.675344 | 1.062263 | 6.737943 | 0.036786 |
| cg08495115 | 2.674274 | 1.092447 | 6.546534 | 0.031276 |
| cg05020604 | 2.674228 | 1.133701 | 6.308097 | 0.024668 |
| cg10512875 | 2.67337  | 1.084976 | 6.587157 | 0.03258  |
| cg09221867 | 2.673342 | 1.107384 | 6.453734 | 0.028757 |
| cg16791619 | 2.671766 | 1.086475 | 6.570176 | 0.032305 |
| cg18630667 | 2.671272 | 1.079597 | 6.60959  | 0.033532 |
| cg09354241 | 2.667572 | 1.01228  | 7.029613 | 0.047183 |
| cg26074603 | 2.666625 | 1.152724 | 6.168771 | 0.021899 |
| cg11414560 | 2.661546 | 1.114249 | 6.35749  | 0.027561 |
| cg26067203 | 2.660517 | 1.055915 | 6.703522 | 0.037953 |
| cg16729415 | 2.659942 | 1.000923 | 7.068764 | 0.049784 |
| cg04575395 | 2.657687 | 1.018193 | 6.937093 | 0.045847 |
| cg03505117 | 2.656889 | 1.120652 | 6.299064 | 0.026514 |
| cg23536473 | 2.656284 | 1.062225 | 6.642517 | 0.036703 |
| cg14979301 | 2.65586  | 1.19784  | 5.888592 | 0.016203 |
| cg18805066 | 2.655425 | 1.027245 | 6.864264 | 0.043859 |
| cg00711088 | 2.654932 | 1.015735 | 6.939471 | 0.046392 |
| cg08322102 | 2.653114 | 1.122069 | 6.273245 | 0.026264 |
| cg23954465 | 2.646428 | 1.024783 | 6.834207 | 0.044374 |
| cg25763036 | 2.646121 | 1.005899 | 6.960895 | 0.048623 |
| cg11600596 | 2.645597 | 1.050527 | 6.662542 | 0.038964 |
| cg14874750 | 2.645228 | 1.050583 | 6.660336 | 0.038951 |
| cg05214690 | 2.644903 | 1.085515 | 6.444419 | 0.032311 |
| cg07990546 | 2.641704 | 1.012734 | 6.890856 | 0.047052 |
| cg22499720 | 2.638305 | 1.051292 | 6.621049 | 0.03878  |
| cg03900143 | 2.638243 | 1.019862 | 6.824768 | 0.045444 |
| cg11074814 | 2.637172 | 1.016417 | 6.842349 | 0.046213 |
| cg00418216 | 2.636767 | 1.054645 | 6.592304 | 0.038101 |
| cg07095230 | 2.635629 | 1.050285 | 6.613959 | 0.038972 |
| cg17629929 | 2.635524 | 1.026268 | 6.7682   | 0.044026 |
| cg08545287 | 2.634722 | 1.047589 | 6.626411 | 0.039517 |
| cg05415020 | 2.633489 | 1.043659 | 6.645145 | 0.04032  |

|            |          |          |          |          |
|------------|----------|----------|----------|----------|
| cg08190858 | 2.632919 | 1.119086 | 6.194574 | 0.026575 |
| cg10784386 | 2.63217  | 1.047198 | 6.616057 | 0.039587 |
| cg17371081 | 2.629455 | 1.146813 | 6.028909 | 0.022399 |
| cg16304215 | 2.628288 | 1.084044 | 6.372344 | 0.032472 |
| cg06241792 | 2.627132 | 1.111323 | 6.210455 | 0.027777 |
| cg24032666 | 2.625881 | 1.17208  | 5.882919 | 0.018988 |
| cg01328892 | 2.625569 | 1.008037 | 6.83865  | 0.048115 |
| cg24150172 | 2.6229   | 1.073107 | 6.410923 | 0.034455 |
| cg00177451 | 2.614645 | 1.081732 | 6.319837 | 0.032807 |
| cg22286978 | 2.613806 | 1.060159 | 6.444298 | 0.036902 |
| cg23424003 | 2.60868  | 1.080464 | 6.298415 | 0.033003 |
| cg22898797 | 2.608207 | 1.127799 | 6.031875 | 0.025018 |
| cg16166796 | 2.606852 | 1.041473 | 6.52506  | 0.040681 |
| cg06060135 | 2.605662 | 1.075443 | 6.313187 | 0.033918 |
| cg18130044 | 2.604877 | 1.183233 | 5.734615 | 0.017414 |
| cg05151154 | 2.602651 | 1.151807 | 5.881013 | 0.021462 |
| cg15313459 | 2.601234 | 1.063251 | 6.363894 | 0.036231 |
| cg15230781 | 2.600542 | 1.01193  | 6.683087 | 0.04719  |
| cg09017619 | 2.598596 | 1.054294 | 6.40495  | 0.038002 |
| cg03232620 | 2.598416 | 1.047527 | 6.445433 | 0.039385 |
| cg25209842 | 2.597921 | 1.026396 | 6.575626 | 0.04391  |
| cg17373442 | 2.596368 | 1.132061 | 5.95474  | 0.024269 |
| cg10770742 | 2.596049 | 1.005065 | 6.705502 | 0.048793 |
| cg26122980 | 2.594335 | 1.186314 | 5.67352  | 0.016944 |
| cg05888917 | 2.594146 | 1.017558 | 6.613475 | 0.045889 |
| cg02895639 | 2.591989 | 1.074379 | 6.253295 | 0.034037 |
| cg21938148 | 2.591202 | 1.05712  | 6.35153  | 0.037398 |
| cg23235241 | 2.589296 | 1.021644 | 6.562413 | 0.044953 |
| cg10448808 | 2.586095 | 1.068998 | 6.256222 | 0.035032 |
| cg12505170 | 2.585539 | 1.006303 | 6.643142 | 0.048494 |
| cg27510182 | 2.584178 | 1.002218 | 6.663199 | 0.049467 |
| cg19115393 | 2.583999 | 1.026263 | 6.506176 | 0.043906 |
| cg25397922 | 2.583051 | 1.055757 | 6.319782 | 0.037634 |
| cg26963797 | 2.582391 | 1.110557 | 6.004865 | 0.027558 |
| cg12356890 | 2.581533 | 1.202007 | 5.544318 | 0.015027 |
| cg07821427 | 2.581068 | 1.186588 | 5.614344 | 0.016782 |
| cg08249988 | 2.580663 | 1.009562 | 6.596741 | 0.047722 |
| cg26195829 | 2.57919  | 1.003551 | 6.628678 | 0.049146 |
| cg02340083 | 2.579126 | 1.031829 | 6.4467   | 0.042663 |
| cg06122871 | 2.578506 | 1.029019 | 6.461194 | 0.04328  |
| cg27170782 | 2.577569 | 1.09987  | 6.04059  | 0.029329 |
| cg17437939 | 2.577328 | 1.070296 | 6.206341 | 0.034732 |
| cg25078444 | 2.575724 | 1.064385 | 6.233038 | 0.035874 |
| cg17320707 | 2.569837 | 1.086631 | 6.077556 | 0.031623 |
| cg05221057 | 2.566466 | 1.044086 | 6.308625 | 0.039978 |
| cg19871940 | 2.565977 | 1.030592 | 6.388794 | 0.042897 |
| cg12060744 | 2.56199  | 1.073336 | 6.115318 | 0.034057 |
| cg13539545 | 2.559963 | 1.02393  | 6.400256 | 0.044374 |
| cg21229570 | 2.558773 | 1.033031 | 6.337965 | 0.042338 |
| cg19944763 | 2.556644 | 1.005688 | 6.499457 | 0.048623 |
| cg11573679 | 2.556129 | 1.10064  | 5.936359 | 0.029035 |
| cg08464190 | 2.554282 | 1.076752 | 6.059292 | 0.033358 |
| cg07034660 | 2.553868 | 1.051425 | 6.203242 | 0.038386 |
| cg19074340 | 2.553796 | 1.089067 | 5.988497 | 0.03107  |

|            |          |          |          |          |
|------------|----------|----------|----------|----------|
| cg15132565 | 2.552541 | 1.113191 | 5.852966 | 0.026882 |
| cg16703956 | 2.551476 | 1.02416  | 6.35646  | 0.044302 |
| cg22029275 | 2.55011  | 1.151088 | 5.649493 | 0.021073 |
| cg24531255 | 2.54698  | 1.029916 | 6.298672 | 0.042993 |
| cg09341793 | 2.546406 | 1.029422 | 6.298856 | 0.043102 |
| cg07143532 | 2.544114 | 1.040494 | 6.220615 | 0.04066  |
| cg23524195 | 2.544069 | 1.026998 | 6.302143 | 0.043641 |
| cg21045464 | 2.543938 | 1.047536 | 6.177947 | 0.039155 |
| cg22471726 | 2.543614 | 1.130457 | 5.723326 | 0.024051 |
| cg06223767 | 2.54296  | 1.079257 | 5.99176  | 0.032811 |
| cg13021333 | 2.542035 | 1.126163 | 5.738018 | 0.024704 |
| cg24847685 | 2.541433 | 1.071257 | 6.029256 | 0.034334 |
| cg09671258 | 2.539614 | 1.068689 | 6.035099 | 0.034825 |
| cg09420439 | 2.539556 | 1.088534 | 5.924796 | 0.031066 |
| cg16787600 | 2.538034 | 1.018015 | 6.327625 | 0.045687 |
| cg20443254 | 2.534108 | 1.022807 | 6.278513 | 0.044571 |
| cg21350575 | 2.531573 | 1.034407 | 6.195687 | 0.041947 |
| cg15133351 | 2.529942 | 1.124148 | 5.69374  | 0.024915 |
| cg22976218 | 2.529607 | 1.03541  | 6.180076 | 0.041719 |
| cg14192957 | 2.527588 | 1.119516 | 5.706665 | 0.025637 |
| cg13699355 | 2.525856 | 1.07701  | 5.923759 | 0.033126 |
| cg03059131 | 2.521496 | 1.037222 | 6.129777 | 0.041291 |
| cg08248516 | 2.520074 | 1.018204 | 6.237229 | 0.04561  |
| cg25738714 | 2.519038 | 1.039842 | 6.10242  | 0.040707 |
| cg27600205 | 2.518927 | 1.073098 | 5.912777 | 0.033836 |
| cg12162138 | 2.517627 | 1.093578 | 5.796065 | 0.02999  |
| cg04546041 | 2.512674 | 1.01172  | 6.240391 | 0.047137 |
| cg08575330 | 2.510074 | 1.008503 | 6.247349 | 0.04791  |
| cg00459623 | 2.508323 | 1.106884 | 5.684144 | 0.027576 |
| cg05417127 | 2.501856 | 1.099749 | 5.691554 | 0.028765 |
| cg23697546 | 2.499508 | 1.074282 | 5.815546 | 0.033481 |
| cg06740600 | 2.494608 | 1.021708 | 6.090853 | 0.044737 |
| cg01578017 | 2.490821 | 1.111011 | 5.584272 | 0.026724 |
| cg11267630 | 2.487108 | 1.054458 | 5.866241 | 0.037426 |
| cg07152216 | 2.487105 | 1.002149 | 6.172426 | 0.049461 |
| cg27223047 | 2.485287 | 1.012155 | 6.102473 | 0.046997 |
| cg24150623 | 2.484844 | 1.131263 | 5.458015 | 0.02338  |
| cg03779241 | 2.482413 | 1.057461 | 5.827518 | 0.036772 |
| cg13267264 | 2.482154 | 1.016144 | 6.063204 | 0.046031 |
| cg11359133 | 2.481222 | 1.131189 | 5.442471 | 0.023357 |
| cg23262036 | 2.479947 | 1.056232 | 5.822712 | 0.037016 |
| cg13062406 | 2.479303 | 1.01074  | 6.081628 | 0.047334 |
| cg13661740 | 2.479265 | 1.014238 | 6.060465 | 0.046485 |
| cg24686074 | 2.474875 | 1.0171   | 6.022029 | 0.045789 |
| cg15506157 | 2.469343 | 1.207283 | 5.050725 | 0.01329  |
| cg24403845 | 2.467141 | 1.080182 | 5.634961 | 0.032113 |
| cg11818631 | 2.46654  | 1.081595 | 5.624855 | 0.031837 |
| cg13356896 | 2.465065 | 1.138118 | 5.339117 | 0.022134 |
| cg18479593 | 2.462337 | 1.087473 | 5.575407 | 0.03069  |
| cg10362542 | 2.460027 | 1.102992 | 5.486652 | 0.027844 |
| cg05224741 | 2.459344 | 1.099796 | 5.499544 | 0.028406 |
| cg02043159 | 2.457982 | 1.033764 | 5.844348 | 0.04184  |
| cg25285090 | 2.456156 | 1.046514 | 5.764566 | 0.038978 |
| cg16288089 | 2.454401 | 1.059337 | 5.686656 | 0.036222 |

|            |          |          |          |          |
|------------|----------|----------|----------|----------|
| cg05375728 | 2.451899 | 1.003783 | 5.989151 | 0.049039 |
| cg27464184 | 2.449405 | 1.047248 | 5.728907 | 0.038786 |
| cg23080354 | 2.449037 | 1.005065 | 5.967558 | 0.048715 |
| cg16504626 | 2.448398 | 1.052384 | 5.696262 | 0.037665 |
| cg21393713 | 2.442253 | 1.098056 | 5.431963 | 0.028574 |
| cg17712694 | 2.437572 | 1.037246 | 5.728397 | 0.040969 |
| cg09780241 | 2.435355 | 1.059159 | 5.599683 | 0.036148 |
| cg10903903 | 2.429065 | 1.153881 | 5.113491 | 0.019448 |
| cg23858040 | 2.426484 | 1.026155 | 5.737755 | 0.043512 |
| cg23806894 | 2.413559 | 1.058011 | 5.505865 | 0.036262 |
| cg26134895 | 2.413228 | 1.041306 | 5.592659 | 0.039942 |
| cg00532157 | 2.412536 | 1.020028 | 5.706051 | 0.044951 |
| cg17016394 | 2.406719 | 1.068137 | 5.422804 | 0.03409  |
| cg22455914 | 2.405354 | 1.085224 | 5.331363 | 0.030667 |
| cg06204735 | 2.402808 | 1.151737 | 5.012852 | 0.019466 |
| cg19715410 | 2.401403 | 1.014888 | 5.68214  | 0.046196 |
| cg23528400 | 2.398261 | 1.023897 | 5.617417 | 0.043973 |
| cg18991611 | 2.396597 | 1.117974 | 5.137579 | 0.024665 |
| cg18856388 | 2.396229 | 1.032867 | 5.559199 | 0.041823 |
| cg04307561 | 2.395059 | 1.008367 | 5.688713 | 0.047834 |
| cg02081006 | 2.391857 | 1.021047 | 5.603051 | 0.044652 |
| cg18323912 | 2.386879 | 1.009083 | 5.645908 | 0.047642 |
| cg19513834 | 2.376116 | 1.040489 | 5.426225 | 0.039959 |
| cg11372090 | 2.370876 | 1.049445 | 5.356213 | 0.037892 |
| cg24675150 | 2.353983 | 1.078365 | 5.138551 | 0.031604 |
| cg10297491 | 2.339224 | 1.002374 | 5.459006 | 0.049362 |
| cg00343633 | 2.332518 | 1.037012 | 5.24646  | 0.040576 |
| cg05864326 | 2.327984 | 1.017693 | 5.325288 | 0.045338 |
| cg06463958 | 2.320623 | 1.058947 | 5.085513 | 0.035462 |
| cg11328303 | 2.316948 | 1.000073 | 5.367856 | 0.04998  |
| cg11014373 | 2.311638 | 1.047138 | 5.10312  | 0.038083 |
| cg14763548 | 2.30989  | 1.015571 | 5.253785 | 0.045845 |
| cg00674365 | 2.302307 | 1.026119 | 5.165697 | 0.043125 |
| cg18448949 | 2.296052 | 1.042159 | 5.058591 | 0.039167 |
| cg14487131 | 2.284858 | 1.057769 | 4.935458 | 0.035475 |
| cg11638181 | 2.284623 | 1.02706  | 5.081982 | 0.042824 |
| cg11965976 | 2.270683 | 1.064752 | 4.842443 | 0.033809 |
| cg18680788 | 2.265354 | 1.001752 | 5.122853 | 0.04951  |
| cg23695133 | 2.250674 | 1.028968 | 4.922928 | 0.042207 |
| cg19019537 | 2.244744 | 1.055325 | 4.774711 | 0.035746 |
| cg22604316 | 2.23929  | 1.048273 | 4.783507 | 0.03737  |
| cg16801887 | 2.234174 | 1.03113  | 4.840837 | 0.041583 |
| cg27154343 | 2.228462 | 1.048126 | 4.73802  | 0.037334 |
| cg02471897 | 2.227307 | 1.072225 | 4.62673  | 0.031799 |
| cg03048654 | 2.223486 | 1.014212 | 4.874614 | 0.046021 |
| cg27555582 | 2.20718  | 1.019991 | 4.776164 | 0.044408 |
| cg06445348 | 2.200819 | 1.004905 | 4.819961 | 0.048587 |
| cg26654934 | 2.195361 | 1.007239 | 4.78497  | 0.047916 |
| cg08768852 | 2.191642 | 1.051447 | 4.568269 | 0.036275 |
| cg08018585 | 2.190683 | 1.006083 | 4.770077 | 0.048241 |
| cg11017065 | 2.111797 | 1.001052 | 4.455    | 0.049678 |
| cg22830113 | 2.098807 | 1.021899 | 4.310592 | 0.043492 |
| cg18243760 | 0.418559 | 0.185728 | 0.943268 | 0.035654 |
| cg05649108 | 0.414928 | 0.17454  | 0.986394 | 0.046484 |

|            |          |          |          |          |
|------------|----------|----------|----------|----------|
| cg12248614 | 0.399237 | 0.170491 | 0.934886 | 0.034425 |
| cg08409113 | 0.376683 | 0.14969  | 0.947896 | 0.038115 |
| cg03140412 | 0.355848 | 0.144906 | 0.873863 | 0.024189 |
| cg03733219 | 0.34198  | 0.118909 | 0.983531 | 0.046506 |
| cg20712263 | 0.34134  | 0.119273 | 0.976857 | 0.045112 |
| cg14457782 | 0.338084 | 0.129746 | 0.880956 | 0.026463 |
| cg17768491 | 0.337016 | 0.141592 | 0.802161 | 0.013963 |
| cg20518446 | 0.330841 | 0.146136 | 0.748999 | 0.007973 |
| cg04754315 | 0.330651 | 0.113242 | 0.965452 | 0.042942 |
| cg00602295 | 0.325646 | 0.111453 | 0.951483 | 0.040279 |
| cg09287864 | 0.320067 | 0.113474 | 0.902789 | 0.031298 |
| cg02604503 | 0.317601 | 0.102876 | 0.980506 | 0.046131 |
| cg08683938 | 0.309644 | 0.096602 | 0.992521 | 0.048542 |
| cg15108727 | 0.302646 | 0.107149 | 0.854831 | 0.024068 |
| cg03518729 | 0.300692 | 0.097287 | 0.929369 | 0.036871 |
| cg09225457 | 0.298046 | 0.113874 | 0.780085 | 0.013668 |
| cg10949007 | 0.293691 | 0.09505  | 0.907464 | 0.033282 |
| cg16389901 | 0.288054 | 0.111236 | 0.745937 | 0.010355 |
| cg24366211 | 0.286699 | 0.097102 | 0.846496 | 0.023719 |
| cg08549335 | 0.285342 | 0.087657 | 0.928851 | 0.037294 |
| cg07388969 | 0.283669 | 0.104284 | 0.771623 | 0.013596 |
| cg08782022 | 0.280796 | 0.108944 | 0.723737 | 0.008557 |
| cg27359566 | 0.277109 | 0.10591  | 0.725044 | 0.008919 |
| cg16206813 | 0.273324 | 0.096664 | 0.772839 | 0.01445  |
| cg03612357 | 0.272018 | 0.089556 | 0.826223 | 0.021635 |
| cg15039102 | 0.271965 | 0.079612 | 0.92907  | 0.03777  |
| cg23309670 | 0.270459 | 0.077161 | 0.94799  | 0.04101  |
| cg22202558 | 0.263802 | 0.076796 | 0.906189 | 0.034309 |
| cg16476991 | 0.263484 | 0.085741 | 0.809693 | 0.019885 |
| cg19101547 | 0.260206 | 0.073822 | 0.917171 | 0.036218 |
| cg04029159 | 0.257687 | 0.092992 | 0.714063 | 0.009118 |
| cg19174643 | 0.256724 | 0.073842 | 0.892546 | 0.032454 |
| cg23807071 | 0.253917 | 0.091679 | 0.703256 | 0.008358 |
| cg22047295 | 0.253479 | 0.072225 | 0.889601 | 0.032146 |
| cg21151432 | 0.250917 | 0.067964 | 0.926362 | 0.03801  |
| cg07474842 | 0.249459 | 0.074086 | 0.839958 | 0.024993 |
| cg13775050 | 0.249325 | 0.089158 | 0.697224 | 0.008113 |
| cg05467676 | 0.248513 | 0.08088  | 0.763582 | 0.01506  |
| cg04495354 | 0.243401 | 0.078897 | 0.750907 | 0.013957 |
| cg04937184 | 0.241035 | 0.081249 | 0.715062 | 0.010334 |
| cg02006615 | 0.238329 | 0.07564  | 0.750939 | 0.01432  |
| cg12273284 | 0.238185 | 0.086314 | 0.657273 | 0.005601 |
| cg03354554 | 0.237435 | 0.065715 | 0.857877 | 0.028246 |
| cg06976598 | 0.233579 | 0.060928 | 0.895468 | 0.033922 |
| cg21708130 | 0.233415 | 0.05918  | 0.920621 | 0.037701 |
| cg06114334 | 0.23096  | 0.087241 | 0.611439 | 0.003174 |
| cg20765408 | 0.230306 | 0.083414 | 0.635878 | 0.004601 |
| cg15787146 | 0.226126 | 0.055049 | 0.928864 | 0.039176 |
| cg05981038 | 0.226107 | 0.052752 | 0.969146 | 0.045267 |
| cg15017278 | 0.224168 | 0.065616 | 0.765842 | 0.017053 |
| cg12534147 | 0.223857 | 0.067129 | 0.746504 | 0.014862 |
| cg05792169 | 0.223012 | 0.055799 | 0.891308 | 0.033775 |
| cg26647617 | 0.22145  | 0.055934 | 0.876754 | 0.031769 |
| cg13905238 | 0.221014 | 0.068926 | 0.70869  | 0.011112 |

|            |          |          |          |          |
|------------|----------|----------|----------|----------|
| cg22790839 | 0.219588 | 0.048306 | 0.998194 | 0.049727 |
| cg13906811 | 0.219557 | 0.065947 | 0.730968 | 0.013487 |
| cg12060422 | 0.219107 | 0.08102  | 0.592543 | 0.002781 |
| cg00971050 | 0.218313 | 0.050505 | 0.943675 | 0.041592 |
| cg25508319 | 0.218173 | 0.065462 | 0.727129 | 0.013184 |
| cg10900455 | 0.21794  | 0.063975 | 0.742446 | 0.014844 |
| cg21035875 | 0.217646 | 0.060924 | 0.777521 | 0.018908 |
| cg01288184 | 0.217256 | 0.074557 | 0.633074 | 0.005146 |
| cg18020065 | 0.217248 | 0.055267 | 0.853966 | 0.028816 |
| cg23019886 | 0.217113 | 0.062731 | 0.751425 | 0.015904 |
| cg26389380 | 0.216434 | 0.071946 | 0.651098 | 0.006458 |
| cg25450266 | 0.216091 | 0.056763 | 0.82264  | 0.024691 |
| cg12052765 | 0.213401 | 0.059126 | 0.77022  | 0.018342 |
| cg14823429 | 0.211604 | 0.056601 | 0.79108  | 0.020983 |
| cg02585906 | 0.211108 | 0.062549 | 0.712507 | 0.012206 |
| cg03577157 | 0.210284 | 0.064818 | 0.682205 | 0.009408 |
| cg08446038 | 0.210179 | 0.062    | 0.712504 | 0.012274 |
| cg27549878 | 0.210067 | 0.05827  | 0.75731  | 0.017087 |
| cg06552563 | 0.200066 | 0.042067 | 0.951502 | 0.04313  |
| cg24631526 | 0.200006 | 0.040709 | 0.982645 | 0.047533 |
| cg18442362 | 0.199337 | 0.064336 | 0.617622 | 0.005188 |
| cg25874782 | 0.199327 | 0.039798 | 0.998337 | 0.049764 |
| cg08415592 | 0.197883 | 0.054746 | 0.715256 | 0.013469 |
| cg26998850 | 0.196215 | 0.058213 | 0.661374 | 0.008618 |
| cg26620710 | 0.195662 | 0.050847 | 0.752918 | 0.017657 |
| cg21568661 | 0.194693 | 0.040589 | 0.933885 | 0.040809 |
| cg09129067 | 0.19443  | 0.061913 | 0.610582 | 0.005033 |
| cg09782560 | 0.193236 | 0.045725 | 0.81662  | 0.025388 |
| cg18178715 | 0.190272 | 0.042263 | 0.856615 | 0.030651 |
| cg20834178 | 0.187629 | 0.047434 | 0.742177 | 0.017082 |
| cg24965479 | 0.187471 | 0.04374  | 0.803512 | 0.02416  |
| cg22525688 | 0.187069 | 0.049608 | 0.705429 | 0.013315 |
| cg11122255 | 0.185821 | 0.039969 | 0.863905 | 0.031829 |
| cg24921221 | 0.1832   | 0.034061 | 0.985355 | 0.048025 |
| cg04794141 | 0.182609 | 0.03751  | 0.888983 | 0.035231 |
| cg20175702 | 0.181894 | 0.057291 | 0.577496 | 0.003835 |
| cg12394201 | 0.181596 | 0.045837 | 0.719441 | 0.015151 |
| cg15564619 | 0.179317 | 0.053389 | 0.602267 | 0.005432 |
| cg03297783 | 0.178659 | 0.037426 | 0.852859 | 0.030809 |
| cg13656752 | 0.178488 | 0.050442 | 0.63158  | 0.007525 |
| cg06487082 | 0.17769  | 0.031778 | 0.993578 | 0.049149 |
| cg19391247 | 0.177227 | 0.045689 | 0.687461 | 0.012356 |
| cg01973676 | 0.176644 | 0.049521 | 0.630104 | 0.007545 |
| cg20803910 | 0.17603  | 0.052079 | 0.594993 | 0.005182 |
| cg24287110 | 0.172898 | 0.038807 | 0.770321 | 0.02132  |
| cg00664697 | 0.169483 | 0.043565 | 0.659356 | 0.010442 |
| cg05336982 | 0.167543 | 0.032571 | 0.861832 | 0.032524 |
| cg24039081 | 0.166635 | 0.040966 | 0.677816 | 0.012308 |
| cg13972124 | 0.165867 | 0.033402 | 0.823648 | 0.028003 |
| cg02853152 | 0.165743 | 0.042682 | 0.643617 | 0.009416 |
| cg23323669 | 0.163678 | 0.032134 | 0.833698 | 0.029336 |
| cg01141339 | 0.163177 | 0.040959 | 0.650088 | 0.010152 |
| cg22009908 | 0.163116 | 0.026931 | 0.98796  | 0.048479 |
| cg13780718 | 0.161769 | 0.049384 | 0.529908 | 0.002621 |

|            |          |          |          |          |
|------------|----------|----------|----------|----------|
| cg14019757 | 0.161554 | 0.037498 | 0.696038 | 0.014437 |
| cg24227481 | 0.159955 | 0.045846 | 0.558071 | 0.004043 |
| cg01425762 | 0.159595 | 0.03707  | 0.687098 | 0.013747 |
| cg05315321 | 0.159414 | 0.034797 | 0.730315 | 0.018045 |
| cg10893986 | 0.157013 | 0.043026 | 0.572976 | 0.005061 |
| cg06261066 | 0.156539 | 0.043409 | 0.564498 | 0.004601 |
| cg16371229 | 0.155932 | 0.033374 | 0.728568 | 0.018149 |
| cg06788267 | 0.15489  | 0.044792 | 0.53561  | 0.003216 |
| cg04202892 | 0.154871 | 0.040327 | 0.594765 | 0.006592 |
| cg24500959 | 0.152781 | 0.042219 | 0.552881 | 0.004196 |
| cg15244327 | 0.151806 | 0.024314 | 0.947808 | 0.043661 |
| cg15688551 | 0.147762 | 0.031785 | 0.686922 | 0.01473  |
| cg02518245 | 0.147691 | 0.02592  | 0.841526 | 0.031216 |
| cg18672030 | 0.147253 | 0.031108 | 0.69704  | 0.015737 |
| cg22700686 | 0.146527 | 0.036322 | 0.591106 | 0.00696  |
| cg07146104 | 0.144911 | 0.027348 | 0.767849 | 0.02318  |
| cg06433467 | 0.144457 | 0.026406 | 0.790272 | 0.025653 |
| cg13454226 | 0.144306 | 0.040788 | 0.510546 | 0.002675 |
| cg06853894 | 0.143757 | 0.041908 | 0.49313  | 0.002042 |
| cg25181684 | 0.14373  | 0.02665  | 0.77517  | 0.02406  |
| cg04951797 | 0.14272  | 0.024875 | 0.818842 | 0.028948 |
| cg07541559 | 0.14189  | 0.035852 | 0.56156  | 0.005401 |
| cg26994377 | 0.14138  | 0.036509 | 0.547485 | 0.004625 |
| cg03064100 | 0.140189 | 0.031947 | 0.615171 | 0.009218 |
| cg21571658 | 0.140055 | 0.039862 | 0.492082 | 0.00217  |
| cg04663932 | 0.139577 | 0.020265 | 0.961366 | 0.045502 |
| cg27132471 | 0.138503 | 0.039019 | 0.491627 | 0.002225 |
| cg09417692 | 0.137812 | 0.029707 | 0.639308 | 0.011362 |
| cg12126901 | 0.137167 | 0.022002 | 0.855138 | 0.033373 |
| cg24158259 | 0.135206 | 0.04106  | 0.445222 | 0.000999 |
| cg23521140 | 0.133677 | 0.04041  | 0.442206 | 0.000978 |
| cg21430685 | 0.133114 | 0.031625 | 0.560293 | 0.005961 |
| cg03466587 | 0.132732 | 0.041269 | 0.426897 | 0.000704 |
| cg07937427 | 0.132214 | 0.034948 | 0.500183 | 0.002878 |
| cg20968743 | 0.131137 | 0.030923 | 0.556123 | 0.005852 |
| cg02892153 | 0.13066  | 0.017844 | 0.956762 | 0.045126 |
| cg01413054 | 0.128175 | 0.035371 | 0.464464 | 0.001764 |
| cg09550909 | 0.127642 | 0.017019 | 0.957313 | 0.045242 |
| cg03553715 | 0.124662 | 0.0265   | 0.586434 | 0.008402 |
| cg09126279 | 0.124613 | 0.035341 | 0.439386 | 0.001199 |
| cg06590173 | 0.123575 | 0.030257 | 0.504705 | 0.003587 |
| cg05398036 | 0.119938 | 0.032913 | 0.437071 | 0.001307 |
| cg10087036 | 0.118102 | 0.034475 | 0.404587 | 0.000673 |
| cg25799109 | 0.116804 | 0.030313 | 0.450074 | 0.001809 |
| cg05673882 | 0.115781 | 0.027994 | 0.478867 | 0.002916 |
| cg06858555 | 0.114523 | 0.029765 | 0.440631 | 0.001621 |
| cg17130457 | 0.114093 | 0.023257 | 0.559703 | 0.007469 |
| cg26502852 | 0.113627 | 0.027536 | 0.468881 | 0.002636 |
| cg26612165 | 0.113603 | 0.014091 | 0.915901 | 0.041106 |
| cg09803959 | 0.112433 | 0.023068 | 0.547992 | 0.006845 |
| cg15101245 | 0.112321 | 0.015341 | 0.822353 | 0.031356 |
| cg19358397 | 0.111851 | 0.017361 | 0.720603 | 0.021183 |
| cg06197966 | 0.108374 | 0.02149  | 0.546543 | 0.007107 |
| cg26577252 | 0.10801  | 0.019504 | 0.598139 | 0.01082  |



|            |          |          |          |          |
|------------|----------|----------|----------|----------|
| cg03800922 | 0.107011 | 0.021008 | 0.54509  | 0.007135 |
| cg14515996 | 0.106793 | 0.020465 | 0.557285 | 0.007965 |
| cg24003508 | 0.105279 | 0.018635 | 0.594763 | 0.010831 |
| cg23804620 | 0.104987 | 0.01551  | 0.71066  | 0.020887 |
| cg07220152 | 0.103793 | 0.012751 | 0.844882 | 0.034216 |
| cg00446414 | 0.102896 | 0.017741 | 0.596774 | 0.011227 |
| cg12435551 | 0.102363 | 0.018414 | 0.569036 | 0.00921  |
| cg16066354 | 0.101143 | 0.021774 | 0.469824 | 0.003456 |
| cg13585930 | 0.099213 | 0.02806  | 0.350788 | 0.000336 |
| cg17576316 | 0.099065 | 0.013774 | 0.712485 | 0.021635 |
| cg11847468 | 0.098488 | 0.016585 | 0.584867 | 0.01077  |
| cg12280317 | 0.098148 | 0.018344 | 0.525121 | 0.006674 |
| cg13749927 | 0.097648 | 0.009889 | 0.964219 | 0.046464 |
| cg00973309 | 0.097395 | 0.0186   | 0.509984 | 0.005831 |
| cg05926314 | 0.096996 | 0.028896 | 0.325591 | 0.000159 |
| cg13324103 | 0.096995 | 0.022529 | 0.417593 | 0.001734 |
| cg14834675 | 0.096105 | 0.022509 | 0.410341 | 0.001563 |
| cg27181375 | 0.09437  | 0.017806 | 0.500164 | 0.005534 |
| cg10536999 | 0.093196 | 0.019862 | 0.437289 | 0.002624 |
| cg01799671 | 0.092053 | 0.020553 | 0.412282 | 0.001819 |
| cg22234930 | 0.091012 | 0.017821 | 0.464783 | 0.003965 |
| cg04926881 | 0.087451 | 0.024133 | 0.316898 | 0.000208 |
| cg08824350 | 0.08737  | 0.013044 | 0.585204 | 0.012    |
| cg27619475 | 0.085715 | 0.011354 | 0.647107 | 0.017221 |
| cg25518868 | 0.08504  | 0.019446 | 0.371887 | 0.001061 |
| cg10773016 | 0.084874 | 0.007636 | 0.943348 | 0.044704 |
| cg13600477 | 0.084079 | 0.00875  | 0.807866 | 0.03197  |
| cg26361533 | 0.083012 | 0.016131 | 0.427186 | 0.002906 |
| cg21324456 | 0.081697 | 0.016222 | 0.411441 | 0.002392 |
| cg23344780 | 0.08062  | 0.012095 | 0.537381 | 0.009278 |
| cg01827726 | 0.080017 | 0.006799 | 0.941732 | 0.044676 |
| cg20618695 | 0.079962 | 0.013904 | 0.459846 | 0.00465  |
| cg03851835 | 0.079661 | 0.018633 | 0.340564 | 0.000642 |
| cg05259836 | 0.079465 | 0.009657 | 0.653863 | 0.01852  |
| cg15034300 | 0.078846 | 0.014783 | 0.42052  | 0.002937 |
| cg23683800 | 0.077433 | 0.01088  | 0.551094 | 0.010617 |
| cg03966751 | 0.076879 | 0.01709  | 0.345838 | 0.000826 |
| cg16210842 | 0.076751 | 0.013724 | 0.429229 | 0.003468 |
| cg25095994 | 0.075903 | 0.014307 | 0.402698 | 0.00246  |
| cg24438354 | 0.07439  | 0.018771 | 0.29481  | 0.000217 |
| cg14356919 | 0.073797 | 0.015158 | 0.359287 | 0.001249 |
| cg11935248 | 0.073012 | 0.010179 | 0.523699 | 0.00923  |
| cg05309989 | 0.070882 | 0.011342 | 0.442996 | 0.004644 |
| cg07756483 | 0.068371 | 0.008807 | 0.53077  | 0.010295 |
| cg23072383 | 0.068117 | 0.009683 | 0.479192 | 0.006954 |
| cg25053413 | 0.06801  | 0.011457 | 0.40373  | 0.003096 |
| cg00068038 | 0.066    | 0.005886 | 0.740077 | 0.027522 |
| cg20873416 | 0.065952 | 0.008117 | 0.535869 | 0.010971 |
| cg00834924 | 0.064339 | 0.008129 | 0.509223 | 0.00934  |
| cg26191447 | 0.06282  | 0.010302 | 0.383079 | 0.002699 |
| cg15771683 | 0.061134 | 0.007713 | 0.484542 | 0.008146 |
| cg13942922 | 0.060699 | 0.006721 | 0.548203 | 0.012585 |
| cg22827210 | 0.059847 | 0.012043 | 0.297396 | 0.000576 |
| cg19262282 | 0.057516 | 0.009982 | 0.331408 | 0.001394 |

|            |          |          |          |          |
|------------|----------|----------|----------|----------|
| cg04387396 | 0.054068 | 0.005429 | 0.538454 | 0.012852 |
| cg00950718 | 0.049359 | 0.005811 | 0.419252 | 0.005845 |
| cg13485320 | 0.044996 | 0.004301 | 0.470716 | 0.009625 |
| cg14150907 | 0.044148 | 0.004903 | 0.397535 | 0.005392 |
| cg02640104 | 0.043167 | 0.005019 | 0.371227 | 0.004202 |
| cg13765004 | 0.042726 | 0.00371  | 0.492055 | 0.011448 |
| cg26051755 | 0.042076 | 0.002394 | 0.739405 | 0.03028  |
| cg05471495 | 0.041364 | 0.005435 | 0.314839 | 0.002098 |
| cg21052608 | 0.040909 | 0.005532 | 0.302496 | 0.00174  |
| cg21853021 | 0.040506 | 0.006384 | 0.257023 | 0.000671 |
| cg00539347 | 0.039656 | 0.00509  | 0.308958 | 0.002061 |
| cg20979153 | 0.03939  | 0.005913 | 0.262419 | 0.00083  |
| cg26168881 | 0.039359 | 0.003927 | 0.394432 | 0.005939 |
| cg27471192 | 0.038763 | 0.00331  | 0.453893 | 0.00962  |
| cg11318133 | 0.036105 | 0.004047 | 0.322115 | 0.002934 |
| cg10156217 | 0.033254 | 0.002669 | 0.41428  | 0.008176 |
| cg06594281 | 0.031628 | 0.002265 | 0.441696 | 0.010246 |
| cg16973527 | 0.030947 | 0.004855 | 0.197251 | 0.000235 |
| cg27129922 | 0.030045 | 0.002529 | 0.356924 | 0.005506 |
| cg15063366 | 0.029384 | 0.000902 | 0.956984 | 0.047177 |
| cg19310148 | 0.027474 | 0.001186 | 0.636354 | 0.02497  |
| cg04111435 | 0.025927 | 0.001396 | 0.481679 | 0.014288 |
| cg07713361 | 0.022529 | 0.000888 | 0.571578 | 0.021505 |
| cg20799268 | 0.017981 | 0.001327 | 0.243586 | 0.002511 |
| cg25116269 | 0.016912 | 0.00062  | 0.461636 | 0.015601 |
| cg21365602 | 0.002422 | 3.66E-05 | 0.160134 | 0.004855 |
