# Supplementary material for: CpG Island Methylator Phenotype Modulates the Immune Response of the Tumor Microenvironment and Influences the Prognosis of Pancreatic Cancer Patients
Source: Hindawi journal article supplement (doi:10.1155/2021/2715694), 2021-11-28
Supplement: f1 [file 2715694.f1.zip]

# Differential CpGs between 184 pancreatic cancer (PC) patients and 10 normal controls(NC)

| CpG site   | Mean expression of NC | Mean expression of PC | log2FC   | pValue   | Satus           |
|------------|-----------------------|-----------------------|----------|----------|-----------------|
| cg01423964 | 0.01267               | 0.346253514           | 4.77234  | 8.72E-07 | hypermethylated |
| cg01638592 | 0.01371               | 0.313350811           | 4.514478 | 2.56E-06 | hypermethylated |
| cg26272220 | 0.01287               | 0.268971351           | 4.385369 | 3.95E-06 | hypermethylated |
| cg13062406 | 0.01375               | 0.284086486           | 4.368827 | 1.56E-06 | hypermethylated |
| cg23080354 | 0.01359               | 0.261954054           | 4.268696 | 4.12E-06 | hypermethylated |
| cg07882671 | 0.01988               | 0.375895676           | 4.240943 | 2.10E-06 | hypermethylated |
| cg02511231 | 0.01926               | 0.36332               | 4.237561 | 4.27E-07 | hypermethylated |
| cg07009376 | 0.0147                | 0.27380973            | 4.219286 | 9.94E-07 | hypermethylated |
| cg15202738 | 0.01421               | 0.263260541           | 4.211513 | 2.49E-06 | hypermethylated |
| cg07252731 | 0.01565               | 0.285990811           | 4.191734 | 9.11E-07 | hypermethylated |
| cg09568464 | 0.0155                | 0.280127568           | 4.175744 | 9.83E-05 | hypermethylated |
| cg03315869 | 0.01464               | 0.261996757           | 4.161561 | 3.04E-06 | hypermethylated |
| cg04638468 | 0.01573               | 0.278552973           | 4.146361 | 6.58E-07 | hypermethylated |
| cg15760257 | 0.01694               | 0.297628108           | 4.135005 | 7.93E-06 | hypermethylated |
| cg19001226 | 0.01604               | 0.281663784           | 4.134228 | 5.97E-06 | hypermethylated |
| cg02279670 | 0.01537               | 0.269217838           | 4.130585 | 1.26E-06 | hypermethylated |
| cg10863741 | 0.01407               | 0.245632432           | 4.125807 | 5.51E-07 | hypermethylated |
| cg15565065 | 0.01728               | 0.296491351           | 4.100815 | 3.44E-06 | hypermethylated |
| cg25875213 | 0.01741               | 0.297108649           | 4.093002 | 5.59E-07 | hypermethylated |
| cg01307939 | 0.01275               | 0.217141622           | 4.090067 | 6.13E-06 | hypermethylated |
| cg25884711 | 0.01751               | 0.29348               | 4.067011 | 1.47E-06 | hypermethylated |
| cg14458834 | 0.01991               | 0.326183784           | 4.03412  | 4.86E-06 | hypermethylated |
| cg10362542 | 0.01711               | 0.27732               | 4.01864  | 1.24E-06 | hypermethylated |
| cg08384637 | 0.01718               | 0.278167027           | 4.017149 | 1.06E-05 | hypermethylated |
| cg24403845 | 0.02159               | 0.347975135           | 4.010549 | 1.37E-06 | hypermethylated |
| cg10096177 | 0.01667               | 0.267984324           | 4.006823 | 1.35E-06 | hypermethylated |
| cg12477716 | 0.02377               | 0.375828649           | 3.982861 | 1.15E-06 | hypermethylated |
| cg06947913 | 0.02316               | 0.363957838           | 3.974064 | 1.08E-05 | hypermethylated |
| cg12799689 | 0.0177                | 0.277155676           | 3.968875 | 2.56E-06 | hypermethylated |
| cg18607529 | 0.01435               | 0.22431027            | 3.966373 | 2.71E-05 | hypermethylated |
| cg18579862 | 0.02283               | 0.354849189           | 3.958203 | 4.24E-06 | hypermethylated |
| cg03394150 | 0.0188                | 0.291815676           | 3.956253 | 1.80E-05 | hypermethylated |
| cg08452658 | 0.01794               | 0.276514054           | 3.946101 | 4.42E-06 | hypermethylated |
| cg15072319 | 0.01981               | 0.305056216           | 3.944774 | 2.83E-06 | hypermethylated |
| cg16443866 | 0.01772               | 0.271557297           | 3.937806 | 9.69E-06 | hypermethylated |
| cg21546671 | 0.01931               | 0.291012432           | 3.913661 | 3.21E-06 | hypermethylated |
| cg08089301 | 0.02028               | 0.302202162           | 3.897384 | 9.57E-06 | hypermethylated |
| cg18328894 | 0.01579               | 0.234931351           | 3.895156 | 3.12E-06 | hypermethylated |
| cg14496450 | 0.01648               | 0.243832432           | 3.887102 | 2.07E-06 | hypermethylated |
| cg16964348 | 0.02227               | 0.329095676           | 3.885334 | 7.52E-07 | hypermethylated |
| cg16732616 | 0.02892               | 0.426784324           | 3.883368 | 1.37E-06 | hypermethylated |
| cg08985029 | 0.01832               | 0.268096216           | 3.871259 | 2.62E-07 | hypermethylated |
| cg04353095 | 0.01803               | 0.262303243           | 3.862764 | 5.07E-06 | hypermethylated |
| cg06952671 | 0.02005               | 0.28817027            | 3.845247 | 2.32E-06 | hypermethylated |
| cg01088410 | 0.01944               | 0.278001081           | 3.83799  | 1.12E-06 | hypermethylated |
| cg27633530 | 0.01818               | 0.257548108           | 3.824418 | 5.12E-05 | hypermethylated |
| cg13135595 | 0.01549               | 0.219320541           | 3.823632 | 2.20E-06 | hypermethylated |
| cg02012576 | 0.01524               | 0.214828649           | 3.817252 | 7.20E-07 | hypermethylated |
| cg04557544 | 0.02765               | 0.389655676           | 3.816848 | 1.20E-06 | hypermethylated |
| cg12074025 | 0.01951               | 0.274367568           | 3.813824 | 1.71E-05 | hypermethylated |
| cg04342092 | 0.0144                | 0.200571892           | 3.799979 | 7.30E-07 | hypermethylated |
| cg04904331 | 0.02771               | 0.384717838           | 3.795322 | 1.60E-06 | hypermethylated |
| cg01614020 | 0.02328               | 0.322650811           | 3.792811 | 2.68E-06 | hypermethylated |
| cg13457172 | 0.01933               | 0.263666486           | 3.769801 | 6.58E-07 | hypermethylated |
| cg12824796 | 0.02541               | 0.345737297           | 3.766208 | 8.10E-07 | hypermethylated |
| cg18680788 | 0.02087               | 0.283420541           | 3.763442 | 1.88E-06 | hypermethylated |

|            |         |             |          |          |                 |
|------------|---------|-------------|----------|----------|-----------------|
| cg06392169 | 0.02776 | 0.376381622 | 3.761117 | 3.12E-06 | hypermethylated |
| cg25999442 | 0.02909 | 0.394372432 | 3.760964 | 5.35E-06 | hypermethylated |
| cg25079102 | 0.01594 | 0.215503243 | 3.756986 | 6.11E-07 | hypermethylated |
| cg17277892 | 0.0199  | 0.268826486 | 3.755835 | 3.12E-06 | hypermethylated |
| cg01642521 | 0.02687 | 0.362039459 | 3.752079 | 1.26E-06 | hypermethylated |
| cg07900968 | 0.01785 | 0.240472432 | 3.751876 | 2.49E-06 | hypermethylated |
| cg17228900 | 0.01818 | 0.242098378 | 3.735169 | 6.58E-07 | hypermethylated |
| cg10332700 | 0.01663 | 0.220637838 | 3.72982  | 3.23E-05 | hypermethylated |
| cg18485844 | 0.02624 | 0.347382162 | 3.726684 | 6.05E-06 | hypermethylated |
| cg12417685 | 0.01861 | 0.245557297 | 3.72191  | 3.64E-06 | hypermethylated |
| cg01410878 | 0.02003 | 0.263620541 | 3.718228 | 1.88E-06 | hypermethylated |
| cg25662463 | 0.01675 | 0.22019027  | 3.716518 | 4.33E-07 | hypermethylated |
| cg04106647 | 0.0168  | 0.219532973 | 3.707905 | 2.99E-06 | hypermethylated |
| cg25778535 | 0.02182 | 0.284364324 | 3.704017 | 3.35E-06 | hypermethylated |
| cg05336698 | 0.01666 | 0.217089189 | 3.703828 | 2.46E-06 | hypermethylated |
| cg14409941 | 0.01822 | 0.236283784 | 3.696926 | 5.14E-06 | hypermethylated |
| cg21384402 | 0.02115 | 0.273909189 | 3.694968 | 6.02E-07 | hypermethylated |
| cg20463526 | 0.02199 | 0.284224865 | 3.692113 | 3.69E-06 | hypermethylated |
| cg25958283 | 0.02741 | 0.352268108 | 3.6839   | 3.44E-06 | hypermethylated |
| cg15927720 | 0.02237 | 0.285900541 | 3.675876 | 2.13E-05 | hypermethylated |
| cg27331241 | 0.01824 | 0.232223243 | 3.670335 | 6.13E-06 | hypermethylated |
| cg18009496 | 0.02425 | 0.307233514 | 3.663279 | 1.88E-06 | hypermethylated |
| cg05720454 | 0.01596 | 0.202058378 | 3.66224  | 3.17E-06 | hypermethylated |
| cg21790626 | 0.02503 | 0.315667027 | 3.656673 | 1.39E-06 | hypermethylated |
| cg05099508 | 0.02286 | 0.285460541 | 3.642394 | 1.54E-06 | hypermethylated |
| cg19288904 | 0.02598 | 0.321944324 | 3.631338 | 1.22E-06 | hypermethylated |
| cg17331296 | 0.02407 | 0.297595135 | 3.628043 | 3.59E-06 | hypermethylated |
| cg20870512 | 0.02312 | 0.285445405 | 3.626002 | 1.58E-05 | hypermethylated |
| cg04543008 | 0.02814 | 0.34734     | 3.625654 | 1.58E-06 | hypermethylated |
| cg20525183 | 0.02316 | 0.285569189 | 3.624133 | 1.60E-05 | hypermethylated |
| cg22014661 | 0.019   | 0.233630811 | 3.620159 | 5.67E-07 | hypermethylated |
| cg24773418 | 0.02129 | 0.261227568 | 3.617059 | 3.39E-06 | hypermethylated |
| cg03703637 | 0.02641 | 0.323068649 | 3.612685 | 6.84E-06 | hypermethylated |
| cg00505277 | 0.02335 | 0.285592973 | 3.612466 | 5.50E-06 | hypermethylated |
| cg18115215 | 0.02008 | 0.245136757 | 3.609756 | 1.44E-05 | hypermethylated |
| cg20978694 | 0.02411 | 0.293779459 | 3.60703  | 6.48E-06 | hypermethylated |
| cg16918989 | 0.02011 | 0.244097838 | 3.601475 | 2.87E-06 | hypermethylated |
| cg05157140 | 0.0256  | 0.308919459 | 3.593015 | 7.32E-06 | hypermethylated |
| cg08586541 | 0.0227  | 0.273702162 | 3.591843 | 1.75E-06 | hypermethylated |
| cg25208017 | 0.03131 | 0.375732973 | 3.585012 | 7.98E-07 | hypermethylated |
| cg22898797 | 0.02476 | 0.297045946 | 3.584603 | 3.30E-06 | hypermethylated |
| cg17208528 | 0.01907 | 0.228266486 | 3.581342 | 8.48E-06 | hypermethylated |
| cg10461004 | 0.01942 | 0.231332973 | 3.574356 | 0.002699 | hypermethylated |
| cg13445199 | 0.02327 | 0.276607568 | 3.571298 | 2.91E-06 | hypermethylated |
| cg26802289 | 0.02186 | 0.259107568 | 3.567186 | 2.15E-05 | hypermethylated |
| cg21097881 | 0.03132 | 0.368036757 | 3.554694 | 3.39E-06 | hypermethylated |
| cg17448335 | 0.02198 | 0.256393514 | 3.544096 | 1.12E-05 | hypermethylated |
| cg07017374 | 0.02652 | 0.308207568 | 3.53875  | 3.90E-06 | hypermethylated |
| cg20817902 | 0.01995 | 0.230566486 | 3.530722 | 2.10E-05 | hypermethylated |
| cg07438617 | 0.02174 | 0.25088973  | 3.52863  | 8.59E-06 | hypermethylated |
| cg08862890 | 0.03001 | 0.344541081 | 3.521161 | 2.57E-05 | hypermethylated |
| cg24761507 | 0.02522 | 0.288508649 | 3.515974 | 3.21E-06 | hypermethylated |
| cg15967847 | 0.01753 | 0.199569189 | 3.508991 | 1.47E-06 | hypermethylated |
| cg21277995 | 0.031   | 0.352556757 | 3.507515 | 9.52E-07 | hypermethylated |
| cg10249375 | 0.0266  | 0.301764865 | 3.503927 | 1.31E-06 | hypermethylated |
| cg01392544 | 0.02934 | 0.33058     | 3.494059 | 2.95E-06 | hypermethylated |
| cg14564616 | 0.02359 | 0.264999459 | 3.489742 | 9.24E-07 | hypermethylated |
| cg25963041 | 0.02538 | 0.284923243 | 3.488809 | 4.26E-05 | hypermethylated |

|            |         |             |          |          |                 |
|------------|---------|-------------|----------|----------|-----------------|
| cg04741853 | 0.02353 | 0.26415027  | 3.488786 | 1.56E-05 | hypermethylated |
| cg25324105 | 0.0342  | 0.383003784 | 3.48529  | 8.84E-07 | hypermethylated |
| cg06241792 | 0.02655 | 0.295504324 | 3.476395 | 5.73E-06 | hypermethylated |
| cg22346124 | 0.02831 | 0.314859459 | 3.475324 | 5.97E-06 | hypermethylated |
| cg08217024 | 0.02871 | 0.319290811 | 3.475246 | 1.77E-06 | hypermethylated |
| cg05347845 | 0.03109 | 0.345166486 | 3.47277  | 5.43E-06 | hypermethylated |
| cg05661282 | 0.03545 | 0.393479459 | 3.472431 | 2.46E-06 | hypermethylated |
| cg20334627 | 0.02451 | 0.271820541 | 3.471212 | 5.07E-06 | hypermethylated |
| cg24876960 | 0.02449 | 0.271442162 | 3.47038  | 3.69E-06 | hypermethylated |
| cg05028087 | 0.02387 | 0.26434     | 3.469124 | 1.12E-06 | hypermethylated |
| cg17504999 | 0.0233  | 0.256626486 | 3.461268 | 1.10E-06 | hypermethylated |
| cg05250768 | 0.02425 | 0.265523243 | 3.452782 | 1.02E-05 | hypermethylated |
| cg17498296 | 0.02802 | 0.305802703 | 3.448072 | 1.72E-06 | hypermethylated |
| cg13542964 | 0.0189  | 0.206240541 | 3.44787  | 1.51E-06 | hypermethylated |
| cg01802258 | 0.0355  | 0.387256216 | 3.447397 | 1.58E-06 | hypermethylated |
| cg26731327 | 0.02    | 0.217942162 | 3.445873 | 1.41E-06 | hypermethylated |
| cg03304610 | 0.02565 | 0.279390811 | 3.445254 | 1.41E-06 | hypermethylated |
| cg15278646 | 0.01752 | 0.19079027  | 3.444913 | 2.95E-06 | hypermethylated |
| cg16457786 | 0.02324 | 0.25308     | 3.444912 | 2.64E-06 | hypermethylated |
| cg22289581 | 0.01876 | 0.203959459 | 3.442551 | 8.98E-07 | hypermethylated |
| cg01261798 | 0.02277 | 0.247496216 | 3.4422   | 6.75E-06 | hypermethylated |
| cg16697214 | 0.02757 | 0.299652432 | 3.442119 | 8.95E-06 | hypermethylated |
| cg05143887 | 0.02078 | 0.224552432 | 3.433785 | 4.30E-06 | hypermethylated |
| cg00609966 | 0.0214  | 0.231077838 | 3.432696 | 1.04E-05 | hypermethylated |
| cg07790615 | 0.02819 | 0.304311892 | 3.432295 | 6.99E-07 | hypermethylated |
| cg00984146 | 0.02562 | 0.276049189 | 3.429583 | 2.15E-05 | hypermethylated |
| cg26483578 | 0.0225  | 0.24193027  | 3.426594 | 7.52E-06 | hypermethylated |
| cg17016394 | 0.03249 | 0.349257838 | 3.426225 | 3.49E-06 | hypermethylated |
| cg19443257 | 0.02405 | 0.258229189 | 3.424543 | 6.57E-06 | hypermethylated |
| cg00615473 | 0.02802 | 0.300819459 | 3.424369 | 0.000245 | hypermethylated |
| cg14999001 | 0.02726 | 0.292623243 | 3.424187 | 0.000161 | hypermethylated |
| cg09968723 | 0.02539 | 0.272037297 | 3.421472 | 3.90E-05 | hypermethylated |
| cg24724633 | 0.02829 | 0.302824324 | 3.420117 | 8.60E-06 | hypermethylated |
| cg18755296 | 0.02548 | 0.272731351 | 3.420043 | 3.30E-06 | hypermethylated |
| cg17460447 | 0.02658 | 0.283644324 | 3.41567  | 1.37E-05 | hypermethylated |
| cg12863545 | 0.02795 | 0.298158919 | 3.415161 | 2.99E-06 | hypermethylated |
| cg11573679 | 0.02508 | 0.267084865 | 3.412689 | 1.12E-05 | hypermethylated |
| cg18705773 | 0.03263 | 0.347087568 | 3.411029 | 6.20E-07 | hypermethylated |
| cg01705052 | 0.02902 | 0.308453514 | 3.409934 | 1.31E-06 | hypermethylated |
| cg27179533 | 0.02563 | 0.271440541 | 3.404731 | 7.72E-06 | hypermethylated |
| cg08708684 | 0.03052 | 0.322623784 | 3.402026 | 6.48E-06 | hypermethylated |
| cg14658804 | 0.03043 | 0.321236757 | 3.400071 | 1.31E-05 | hypermethylated |
| cg01672943 | 0.02664 | 0.280907568 | 3.39843  | 4.24E-06 | hypermethylated |
| cg09017619 | 0.02712 | 0.285867568 | 3.397918 | 1.45E-06 | hypermethylated |
| cg00003298 | 0.02867 | 0.300827568 | 3.391323 | 1.04E-05 | hypermethylated |
| cg16887264 | 0.02685 | 0.281262162 | 3.388921 | 5.03E-07 | hypermethylated |
| cg14510812 | 0.02615 | 0.273750811 | 3.38798  | 1.35E-06 | hypermethylated |
| cg27034819 | 0.01744 | 0.182458378 | 3.387095 | 1.85E-06 | hypermethylated |
| cg26013553 | 0.03819 | 0.399498919 | 3.386925 | 3.44E-06 | hypermethylated |
| cg03401096 | 0.02979 | 0.311243243 | 3.385142 | 0.001875 | hypermethylated |
| cg07136998 | 0.0328  | 0.342604865 | 3.384778 | 1.17E-05 | hypermethylated |
| cg14072515 | 0.03064 | 0.319942703 | 3.384325 | 3.21E-06 | hypermethylated |
| cg05238769 | 0.02335 | 0.243651892 | 3.383327 | 1.54E-06 | hypermethylated |
| cg23121993 | 0.04073 | 0.423527027 | 3.37829  | 1.37E-06 | hypermethylated |
| cg14874750 | 0.02555 | 0.265676757 | 3.378277 | 8.71E-06 | hypermethylated |
| cg20230721 | 0.03347 | 0.347775135 | 3.377214 | 1.85E-06 | hypermethylated |
| cg15547669 | 0.0229  | 0.236867568 | 3.370661 | 2.95E-06 | hypermethylated |
| cg00778995 | 0.02505 | 0.25858973  | 3.367782 | 3.96E-07 | hypermethylated |

|            |         |             |          |          |                 |
|------------|---------|-------------|----------|----------|-----------------|
| cg07302069 | 0.03609 | 0.371013514 | 3.361801 | 7.09E-07 | hypermethylated |
| cg21688264 | 0.02183 | 0.224151892 | 3.360093 | 3.49E-06 | hypermethylated |
| cg21077559 | 0.02108 | 0.21608     | 3.357619 | 1.90E-06 | hypermethylated |
| cg15386964 | 0.02613 | 0.267704324 | 3.356861 | 8.71E-06 | hypermethylated |
| cg01543173 | 0.02404 | 0.245541622 | 3.352459 | 7.93E-06 | hypermethylated |
| cg07143532 | 0.02549 | 0.259421622 | 3.347295 | 1.02E-05 | hypermethylated |
| cg06445348 | 0.03396 | 0.344970811 | 3.344566 | 1.68E-05 | hypermethylated |
| cg17105834 | 0.03353 | 0.340020541 | 3.342098 | 3.96E-06 | hypermethylated |
| cg09528825 | 0.02925 | 0.296448649 | 3.341274 | 2.89E-05 | hypermethylated |
| cg09570682 | 0.03218 | 0.325701081 | 3.339312 | 1.90E-06 | hypermethylated |
| cg14507560 | 0.03839 | 0.388421622 | 3.338821 | 3.79E-06 | hypermethylated |
| cg07832473 | 0.02298 | 0.232473514 | 3.338616 | 6.05E-06 | hypermethylated |
| cg02869459 | 0.02167 | 0.218417838 | 3.33332  | 5.28E-06 | hypermethylated |
| cg20435370 | 0.01765 | 0.177811351 | 3.332607 | 1.90E-06 | hypermethylated |
| cg12243597 | 0.02974 | 0.298829189 | 3.328845 | 3.59E-06 | hypermethylated |
| cg02767771 | 0.03104 | 0.31189027  | 3.328838 | 3.04E-06 | hypermethylated |
| cg23727983 | 0.03007 | 0.301760541 | 3.327007 | 2.75E-06 | hypermethylated |
| cg08111446 | 0.02771 | 0.276640541 | 3.319534 | 2.85E-05 | hypermethylated |
| cg22978087 | 0.03273 | 0.326655135 | 3.319083 | 7.12E-06 | hypermethylated |
| cg08151857 | 0.03044 | 0.303780541 | 3.318989 | 2.39E-06 | hypermethylated |
| cg07230107 | 0.01671 | 0.16675027  | 3.318905 | 3.39E-06 | hypermethylated |
| cg16504626 | 0.03064 | 0.305687568 | 3.31857  | 1.96E-06 | hypermethylated |
| cg06759189 | 0.0212  | 0.211445946 | 3.318153 | 3.74E-06 | hypermethylated |
| cg18856388 | 0.03314 | 0.32962973  | 3.314201 | 1.93E-06 | hypermethylated |
| cg03278146 | 0.02835 | 0.281578378 | 3.312116 | 3.69E-06 | hypermethylated |
| cg17839237 | 0.03844 | 0.381246486 | 3.310044 | 3.35E-06 | hypermethylated |
| cg14492800 | 0.02701 | 0.267098919 | 3.305809 | 5.00E-06 | hypermethylated |
| cg07589773 | 0.03412 | 0.336848649 | 3.303411 | 0.00012  | hypermethylated |
| cg22286978 | 0.02939 | 0.289562703 | 3.300479 | 6.48E-06 | hypermethylated |
| cg21913319 | 0.0245  | 0.241367027 | 3.300375 | 1.31E-05 | hypermethylated |
| cg09236176 | 0.02965 | 0.291690811 | 3.298336 | 1.60E-06 | hypermethylated |
| cg02595832 | 0.03171 | 0.31181027  | 3.297659 | 2.07E-06 | hypermethylated |
| cg02746725 | 0.02199 | 0.21618     | 3.297314 | 5.34E-07 | hypermethylated |
| cg08553437 | 0.02724 | 0.267428649 | 3.295355 | 1.60E-06 | hypermethylated |
| cg23253569 | 0.02724 | 0.267285405 | 3.294582 | 3.04E-06 | hypermethylated |
| cg00091285 | 0.0195  | 0.191087027 | 3.292684 | 2.13E-06 | hypermethylated |
| cg13905586 | 0.02162 | 0.211535676 | 3.290463 | 1.44E-05 | hypermethylated |
| cg10250663 | 0.03603 | 0.352174054 | 3.289018 | 4.18E-06 | hypermethylated |
| cg04849541 | 0.03553 | 0.345750811 | 3.282623 | 5.58E-06 | hypermethylated |
| cg01889143 | 0.03183 | 0.309351892 | 3.28079  | 8.59E-07 | hypermethylated |
| cg10981909 | 0.02668 | 0.258844865 | 3.278257 | 6.01E-05 | hypermethylated |
| cg26295057 | 0.03796 | 0.368180541 | 3.277861 | 1.39E-05 | hypermethylated |
| cg23346462 | 0.02885 | 0.27937027  | 3.275535 | 3.12E-06 | hypermethylated |
| cg01670677 | 0.02515 | 0.243328649 | 3.274276 | 6.39E-06 | hypermethylated |
| cg21350575 | 0.03719 | 0.359465405 | 3.272866 | 3.21E-06 | hypermethylated |
| cg09874822 | 0.03454 | 0.333435135 | 3.271066 | 4.01E-06 | hypermethylated |
| cg11416384 | 0.03223 | 0.31088     | 3.269882 | 1.48E-05 | hypermethylated |
| cg14214262 | 0.02086 | 0.201111351 | 3.269183 | 9.66E-07 | hypermethylated |
| cg17847723 | 0.01965 | 0.189275135 | 3.267884 | 9.24E-07 | hypermethylated |
| cg08675717 | 0.02702 | 0.260212973 | 3.267593 | 0.000174 | hypermethylated |
| cg27490380 | 0.01701 | 0.163782162 | 3.267323 | 1.64E-05 | hypermethylated |
| cg24446548 | 0.0295  | 0.283406486 | 3.264086 | 1.07E-06 | hypermethylated |
| cg10922935 | 0.02785 | 0.267522162 | 3.263909 | 5.19E-05 | hypermethylated |
| cg01535698 | 0.03239 | 0.310269189 | 3.2599   | 3.12E-06 | hypermethylated |
| cg11732619 | 0.02235 | 0.214081081 | 3.259811 | 0.000138 | hypermethylated |
| cg26246807 | 0.03941 | 0.376954054 | 3.257755 | 3.54E-06 | hypermethylated |
| cg19859290 | 0.03345 | 0.319635676 | 3.25635  | 1.39E-06 | hypermethylated |
| cg01939477 | 0.03586 | 0.342537297 | 3.255814 | 1.82E-06 | hypermethylated |



|            |         |             |          |          |                 |
|------------|---------|-------------|----------|----------|-----------------|
| cg21938148 | 0.02841 | 0.270543784 | 3.251391 | 6.22E-06 | hypermethylated |
| cg20872937 | 0.03212 | 0.305439459 | 3.249343 | 5.97E-06 | hypermethylated |
| cg26170604 | 0.03111 | 0.295791892 | 3.249132 | 3.69E-06 | hypermethylated |
| cg12974388 | 0.02792 | 0.26520973  | 3.247763 | 4.42E-06 | hypermethylated |
| cg15867939 | 0.02171 | 0.205979459 | 3.246069 | 1.35E-05 | hypermethylated |
| cg11017065 | 0.03643 | 0.344339459 | 3.240633 | 1.93E-06 | hypermethylated |
| cg24454144 | 0.03737 | 0.352876757 | 3.239212 | 1.82E-06 | hypermethylated |
| cg18130044 | 0.03588 | 0.337924324 | 3.235448 | 7.32E-06 | hypermethylated |
| cg08516516 | 0.02682 | 0.25238     | 3.234216 | 3.04E-06 | hypermethylated |
| cg08701047 | 0.02595 | 0.243943784 | 3.232742 | 1.93E-06 | hypermethylated |
| cg02300154 | 0.03955 | 0.371658378 | 3.232228 | 2.42E-06 | hypermethylated |
| cg17498773 | 0.02934 | 0.274924324 | 3.228094 | 8.26E-06 | hypermethylated |
| cg00282249 | 0.03476 | 0.325707568 | 3.228077 | 1.77E-06 | hypermethylated |
| cg27398263 | 0.03368 | 0.315384865 | 3.227149 | 5.00E-06 | hypermethylated |
| cg05384102 | 0.02623 | 0.245605946 | 3.227056 | 5.14E-06 | hypermethylated |
| cg17398252 | 0.027   | 0.25259027  | 3.225768 | 0.00012  | hypermethylated |
| cg24873562 | 0.0268  | 0.250717297 | 3.225757 | 4.36E-06 | hypermethylated |
| cg05166490 | 0.02621 | 0.245136757 | 3.225398 | 6.57E-06 | hypermethylated |
| cg26232818 | 0.02058 | 0.192463243 | 3.225268 | 3.56E-07 | hypermethylated |
| cg18404308 | 0.02075 | 0.19402973  | 3.225094 | 2.16E-06 | hypermethylated |
| cg24884519 | 0.03046 | 0.284681081 | 3.224359 | 5.50E-06 | hypermethylated |
| cg17772028 | 0.02848 | 0.265912432 | 3.22293  | 9.82E-06 | hypermethylated |
| cg13222752 | 0.03958 | 0.369523784 | 3.222824 | 1.99E-06 | hypermethylated |
| cg18568990 | 0.02304 | 0.214870811 | 3.221257 | 2.85E-05 | hypermethylated |
| cg16543094 | 0.02648 | 0.246814595 | 3.220453 | 4.01E-06 | hypermethylated |
| cg19380001 | 0.02105 | 0.196105405 | 3.219737 | 1.31E-06 | hypermethylated |
| cg27376182 | 0.04039 | 0.375800541 | 3.217897 | 3.44E-06 | hypermethylated |
| cg18991611 | 0.0339  | 0.315282162 | 3.217286 | 4.80E-06 | hypermethylated |
| cg24347663 | 0.03271 | 0.303857838 | 3.215593 | 5.00E-06 | hypermethylated |
| cg14650610 | 0.03405 | 0.316137297 | 3.214825 | 1.44E-05 | hypermethylated |
| cg24663256 | 0.02755 | 0.255114595 | 3.211021 | 2.79E-06 | hypermethylated |
| cg22882665 | 0.03126 | 0.288738919 | 3.207376 | 6.84E-06 | hypermethylated |
| cg09551147 | 0.02112 | 0.194803784 | 3.20534  | 3.21E-06 | hypermethylated |
| cg26067203 | 0.02864 | 0.263395135 | 3.201125 | 0.000117 | hypermethylated |
| cg16616521 | 0.02873 | 0.264188108 | 3.200936 | 7.86E-07 | hypermethylated |
| cg27357571 | 0.0317  | 0.291353514 | 3.200216 | 1.29E-06 | hypermethylated |
| cg09682330 | 0.02546 | 0.233995135 | 3.200174 | 1.47E-06 | hypermethylated |
| cg19074340 | 0.03782 | 0.347252973 | 3.198766 | 4.60E-06 | hypermethylated |
| cg08495115 | 0.02672 | 0.244991351 | 3.196739 | 4.47E-05 | hypermethylated |
| cg07573209 | 0.03257 | 0.298154595 | 3.194445 | 1.07E-06 | hypermethylated |
| cg26998044 | 0.03407 | 0.31181027  | 3.194095 | 1.37E-05 | hypermethylated |
| cg14416371 | 0.04562 | 0.417155135 | 3.192846 | 1.33E-06 | hypermethylated |
| cg27513573 | 0.02445 | 0.223364324 | 3.191492 | 1.39E-06 | hypermethylated |
| cg15146859 | 0.027   | 0.246424865 | 3.190117 | 4.36E-06 | hypermethylated |
| cg02861380 | 0.02792 | 0.254741081 | 3.189661 | 4.24E-06 | hypermethylated |
| cg25570913 | 0.04041 | 0.368477838 | 3.188794 | 1.17E-06 | hypermethylated |
| cg10569606 | 0.02596 | 0.236128649 | 3.185211 | 2.79E-06 | hypermethylated |
| cg22521696 | 0.02308 | 0.209724324 | 3.183779 | 2.46E-06 | hypermethylated |
| cg04704053 | 0.03529 | 0.320646486 | 3.183652 | 1.22E-06 | hypermethylated |
| cg05374412 | 0.02991 | 0.271518378 | 3.18235  | 3.26E-06 | hypermethylated |
| cg14024461 | 0.02036 | 0.184636757 | 3.18088  | 7.20E-07 | hypermethylated |
| cg21042456 | 0.03573 | 0.323929189 | 3.180471 | 5.03E-07 | hypermethylated |
| cg25602684 | 0.02894 | 0.261983243 | 3.178338 | 4.80E-06 | hypermethylated |
| cg10615414 | 0.02853 | 0.257969189 | 3.176647 | 2.29E-06 | hypermethylated |
| cg03225817 | 0.02585 | 0.233706486 | 3.176462 | 1.77E-06 | hypermethylated |
| cg00243313 | 0.02343 | 0.211290811 | 3.172801 | 2.05E-06 | hypermethylated |
| cg21819468 | 0.02681 | 0.241604865 | 3.171806 | 3.21E-06 | hypermethylated |
| cg00851770 | 0.03149 | 0.283762703 | 3.171719 | 1.50E-05 | hypermethylated |

|            |         |             |          |          |                 |
|------------|---------|-------------|----------|----------|-----------------|
| cg14587524 | 0.04801 | 0.432516757 | 3.171349 | 2.10E-06 | hypermethylated |
| cg24685755 | 0.03428 | 0.308725405 | 3.170885 | 2.92E-05 | hypermethylated |
| cg05571581 | 0.03593 | 0.323417297 | 3.170136 | 8.59E-07 | hypermethylated |
| cg21282630 | 0.03146 | 0.283157297 | 3.170013 | 1.82E-06 | hypermethylated |
| cg13291704 | 0.026   | 0.233903784 | 3.169332 | 2.20E-06 | hypermethylated |
| cg20980783 | 0.02175 | 0.195644865 | 3.16915  | 6.66E-06 | hypermethylated |
| cg04281464 | 0.03245 | 0.291634054 | 3.167869 | 1.82E-06 | hypermethylated |
| cg06223767 | 0.04105 | 0.368409189 | 3.165855 | 7.12E-06 | hypermethylated |
| cg23003534 | 0.02834 | 0.254108108 | 3.164531 | 1.33E-05 | hypermethylated |
| cg26998274 | 0.04357 | 0.390372432 | 3.163444 | 1.63E-06 | hypermethylated |
| cg15708153 | 0.0359  | 0.321463784 | 3.1626   | 1.04E-05 | hypermethylated |
| cg03217795 | 0.0312  | 0.279152973 | 3.161438 | 1.93E-06 | hypermethylated |
| cg13939859 | 0.02862 | 0.25599027  | 3.160993 | 9.11E-07 | hypermethylated |
| cg24767148 | 0.02963 | 0.264672973 | 3.15908  | 1.30E-05 | hypermethylated |
| cg06082745 | 0.02517 | 0.224814054 | 3.158955 | 8.26E-06 | hypermethylated |
| cg04672706 | 0.02845 | 0.253642162 | 3.156294 | 7.03E-06 | hypermethylated |
| cg11601252 | 0.03819 | 0.340316216 | 3.155609 | 4.12E-06 | hypermethylated |
| cg13933262 | 0.02807 | 0.250112432 | 3.155476 | 3.44E-06 | hypermethylated |
| cg21707187 | 0.03823 | 0.340538919 | 3.155043 | 2.91E-06 | hypermethylated |
| cg03387135 | 0.02688 | 0.239188108 | 3.153541 | 3.39E-06 | hypermethylated |
| cg01283246 | 0.03655 | 0.32499027  | 3.152453 | 3.04E-06 | hypermethylated |
| cg05020604 | 0.04082 | 0.362801081 | 3.151831 | 1.45E-06 | hypermethylated |
| cg13142700 | 0.03432 | 0.304224324 | 3.148014 | 7.62E-06 | hypermethylated |
| cg13512069 | 0.01614 | 0.142843243 | 3.14572  | 1.45E-06 | hypermethylated |
| cg13912115 | 0.02757 | 0.243876216 | 3.144978 | 4.93E-06 | hypermethylated |
| cg19971716 | 0.02514 | 0.222069189 | 3.142953 | 6.84E-06 | hypermethylated |
| cg27111463 | 0.0248  | 0.219054054 | 3.142875 | 3.85E-06 | hypermethylated |
| cg00339556 | 0.02585 | 0.22818973  | 3.141998 | 1.67E-06 | hypermethylated |
| cg20219457 | 0.03366 | 0.296663784 | 3.139722 | 1.15E-05 | hypermethylated |
| cg09774787 | 0.03387 | 0.297886486 | 3.136683 | 3.21E-06 | hypermethylated |
| cg16277479 | 0.0288  | 0.253251892 | 3.136432 | 3.74E-06 | hypermethylated |
| cg14192957 | 0.03373 | 0.295780541 | 3.132423 | 8.60E-06 | hypermethylated |
| cg23623622 | 0.03358 | 0.294448108 | 3.132339 | 1.12E-06 | hypermethylated |
| cg03112087 | 0.04264 | 0.373718378 | 3.131672 | 1.39E-05 | hypermethylated |
| cg16326674 | 0.03084 | 0.270183243 | 3.131064 | 1.54E-05 | hypermethylated |
| cg06060135 | 0.04413 | 0.386559459 | 3.130859 | 1.82E-06 | hypermethylated |
| cg14123923 | 0.03026 | 0.264464324 | 3.127589 | 2.29E-06 | hypermethylated |
| cg02471897 | 0.04187 | 0.365717838 | 3.126742 | 1.39E-05 | hypermethylated |
| cg21678461 | 0.02466 | 0.21527027  | 3.125904 | 6.11E-07 | hypermethylated |
| cg19651132 | 0.03565 | 0.310915135 | 3.124547 | 5.21E-06 | hypermethylated |
| cg12072964 | 0.0341  | 0.297178919 | 3.123488 | 7.52E-06 | hypermethylated |
| cg24129382 | 0.0259  | 0.225207568 | 3.120231 | 1.62E-05 | hypermethylated |
| cg16166796 | 0.0381  | 0.331224324 | 3.119946 | 3.49E-06 | hypermethylated |
| cg20014049 | 0.02962 | 0.257015676 | 3.117213 | 8.60E-06 | hypermethylated |
| cg16206460 | 0.04201 | 0.36402973  | 3.115252 | 6.84E-06 | hypermethylated |
| cg21678445 | 0.04128 | 0.357610811 | 3.114875 | 2.42E-06 | hypermethylated |
| cg22512438 | 0.02732 | 0.23646     | 3.113567 | 2.99E-06 | hypermethylated |
| cg07700514 | 0.03926 | 0.339701081 | 3.113134 | 1.70E-06 | hypermethylated |
| cg21185289 | 0.04077 | 0.352010811 | 3.11004  | 2.87E-06 | hypermethylated |
| cg10311806 | 0.03183 | 0.274763243 | 3.10973  | 8.71E-06 | hypermethylated |
| cg20744625 | 0.03098 | 0.267392973 | 3.109553 | 1.02E-05 | hypermethylated |
| cg06341513 | 0.02981 | 0.256932973 | 3.107524 | 1.20E-05 | hypermethylated |
| cg21161253 | 0.03043 | 0.262237838 | 3.10731  | 8.59E-07 | hypermethylated |
| cg27420520 | 0.02275 | 0.195908108 | 3.106239 | 9.07E-06 | hypermethylated |
| cg10079740 | 0.03297 | 0.283822162 | 3.105761 | 2.45E-05 | hypermethylated |
| cg19656577 | 0.04052 | 0.348264865 | 3.103479 | 3.59E-06 | hypermethylated |
| cg25623768 | 0.03738 | 0.320787568 | 3.10128  | 1.46E-05 | hypermethylated |
| cg10983544 | 0.03365 | 0.288542162 | 3.100104 | 2.10E-06 | hypermethylated |

|            |         |             |          |          |                 |
|------------|---------|-------------|----------|----------|-----------------|
| cg05214690 | 0.03146 | 0.269714595 | 3.099843 | 6.48E-06 | hypermethylated |
| cg22001496 | 0.03931 | 0.336695676 | 3.098477 | 6.84E-06 | hypermethylated |
| cg07533148 | 0.04752 | 0.406791351 | 3.097682 | 1.41E-06 | hypermethylated |
| cg06971129 | 0.03313 | 0.283555676 | 3.097422 | 2.64E-06 | hypermethylated |
| cg09474331 | 0.04607 | 0.394243784 | 3.097189 | 2.56E-06 | hypermethylated |
| cg03963198 | 0.0375  | 0.320755135 | 3.09651  | 2.42E-06 | hypermethylated |
| cg01805540 | 0.04053 | 0.346645405 | 3.096399 | 1.70E-06 | hypermethylated |
| cg04188273 | 0.02845 | 0.242947027 | 3.094141 | 6.22E-06 | hypermethylated |
| cg06740600 | 0.03162 | 0.26983027  | 3.093143 | 4.36E-06 | hypermethylated |
| cg26796679 | 0.03252 | 0.277399459 | 3.092566 | 4.58E-05 | hypermethylated |
| cg04030615 | 0.03196 | 0.272322703 | 3.090978 | 1.33E-06 | hypermethylated |
| cg05089090 | 0.03528 | 0.300384865 | 3.08989  | 2.10E-06 | hypermethylated |
| cg25976257 | 0.02538 | 0.216070811 | 3.08974  | 1.28E-05 | hypermethylated |
| cg01688536 | 0.04728 | 0.402276757 | 3.088886 | 9.11E-07 | hypermethylated |
| cg02745211 | 0.03822 | 0.324796757 | 3.087138 | 7.93E-06 | hypermethylated |
| cg18348647 | 0.04302 | 0.365534054 | 3.086926 | 2.32E-06 | hypermethylated |
| cg21502786 | 0.03311 | 0.281180541 | 3.086158 | 7.72E-06 | hypermethylated |
| cg16857858 | 0.03667 | 0.311410811 | 3.086147 | 5.45E-05 | hypermethylated |
| cg20482521 | 0.0289  | 0.245236216 | 3.085031 | 5.11E-07 | hypermethylated |
| cg26477488 | 0.0378  | 0.320751351 | 3.084997 | 9.69E-06 | hypermethylated |
| cg02320740 | 0.02378 | 0.201583243 | 3.083555 | 1.41E-06 | hypermethylated |
| cg25317585 | 0.04845 | 0.410639459 | 3.083304 | 7.93E-06 | hypermethylated |
| cg13281139 | 0.03179 | 0.269424324 | 3.083235 | 4.24E-06 | hypermethylated |
| cg09582952 | 0.02562 | 0.216942703 | 3.081972 | 1.50E-05 | hypermethylated |
| cg13919438 | 0.02415 | 0.20432     | 3.080735 | 2.32E-05 | hypermethylated |
| cg11595545 | 0.05104 | 0.431811892 | 3.080703 | 1.33E-06 | hypermethylated |
| cg22199216 | 0.03994 | 0.33717027  | 3.077571 | 7.83E-06 | hypermethylated |
| cg05224741 | 0.03055 | 0.257594054 | 3.075855 | 7.12E-06 | hypermethylated |
| cg19696317 | 0.03269 | 0.275452432 | 3.074882 | 2.16E-06 | hypermethylated |
| cg00213479 | 0.04679 | 0.394175676 | 3.074567 | 3.04E-06 | hypermethylated |
| cg04390523 | 0.03297 | 0.277202162 | 3.071713 | 2.16E-06 | hypermethylated |
| cg27200446 | 0.04528 | 0.380575135 | 3.071235 | 1.56E-06 | hypermethylated |
| cg07495363 | 0.03113 | 0.261143784 | 3.068467 | 5.43E-06 | hypermethylated |
| cg12662072 | 0.03557 | 0.298187568 | 3.067487 | 1.64E-05 | hypermethylated |
| cg04575395 | 0.03429 | 0.286764324 | 3.064006 | 5.28E-06 | hypermethylated |
| cg14168530 | 0.03753 | 0.313514054 | 3.062414 | 3.17E-06 | hypermethylated |
| cg06818710 | 0.02897 | 0.241848649 | 3.061473 | 2.16E-06 | hypermethylated |
| cg21858485 | 0.03141 | 0.261998378 | 3.060262 | 5.35E-06 | hypermethylated |
| cg13699355 | 0.05122 | 0.42704973  | 3.059625 | 2.75E-06 | hypermethylated |
| cg16571983 | 0.03072 | 0.25588     | 3.058217 | 2.23E-06 | hypermethylated |
| cg09868336 | 0.03448 | 0.286969189 | 3.057064 | 8.04E-06 | hypermethylated |
| cg12919520 | 0.02734 | 0.22704973  | 3.053923 | 1.02E-06 | hypermethylated |
| cg26526374 | 0.02891 | 0.239958378 | 3.053144 | 9.82E-06 | hypermethylated |
| cg27562682 | 0.03418 | 0.28329027  | 3.051057 | 3.79E-06 | hypermethylated |
| cg27477373 | 0.03921 | 0.324892973 | 3.050671 | 1.96E-06 | hypermethylated |
| cg01952234 | 0.0313  | 0.259071892 | 3.049118 | 1.73E-05 | hypermethylated |
| cg07914084 | 0.03776 | 0.312424865 | 3.048579 | 5.50E-06 | hypermethylated |
| cg19912142 | 0.04548 | 0.375888108 | 3.046999 | 1.12E-06 | hypermethylated |
| cg20987924 | 0.03224 | 0.266428649 | 3.046826 | 5.50E-06 | hypermethylated |
| cg10358533 | 0.04314 | 0.356244865 | 3.045771 | 2.42E-06 | hypermethylated |
| cg18424634 | 0.02392 | 0.197436216 | 3.045097 | 1.82E-06 | hypermethylated |
| cg23632875 | 0.04227 | 0.348827568 | 3.044808 | 3.90E-06 | hypermethylated |
| cg01419831 | 0.03841 | 0.316847027 | 3.044233 | 2.36E-06 | hypermethylated |
| cg03059131 | 0.03688 | 0.304204865 | 3.044133 | 7.63E-07 | hypermethylated |
| cg09252495 | 0.02731 | 0.225022162 | 3.042566 | 1.54E-05 | hypermethylated |
| cg19035107 | 0.02459 | 0.202145405 | 3.03925  | 2.92E-07 | hypermethylated |
| cg07080358 | 0.034   | 0.279405946 | 3.038756 | 5.58E-06 | hypermethylated |
| cg13356896 | 0.04676 | 0.383896216 | 3.03737  | 6.75E-06 | hypermethylated |

|            |         |             |          |          |                 |
|------------|---------|-------------|----------|----------|-----------------|
| cg00421139 | 0.04022 | 0.330163784 | 3.037197 | 3.76E-05 | hypermethylated |
| cg15836635 | 0.03565 | 0.292598919 | 3.03695  | 6.66E-06 | hypermethylated |
| cg04293733 | 0.03565 | 0.292496757 | 3.036447 | 9.96E-06 | hypermethylated |
| cg23448584 | 0.03283 | 0.269042162 | 3.034746 | 6.84E-06 | hypermethylated |
| cg14712186 | 0.028   | 0.229303784 | 3.033761 | 3.49E-06 | hypermethylated |
| cg12040830 | 0.05189 | 0.424717297 | 3.032974 | 3.49E-06 | hypermethylated |
| cg09894698 | 0.03153 | 0.257829189 | 3.031619 | 5.89E-06 | hypermethylated |
| cg18147485 | 0.04583 | 0.374309189 | 3.029866 | 8.94E-05 | hypermethylated |
| cg07912789 | 0.04146 | 0.338483784 | 3.029295 | 3.85E-06 | hypermethylated |
| cg08441170 | 0.03882 | 0.316307027 | 3.026454 | 3.67E-05 | hypermethylated |
| cg03758150 | 0.04426 | 0.359932432 | 3.023651 | 2.20E-06 | hypermethylated |
| cg09935282 | 0.03536 | 0.287548649 | 3.023616 | 5.72E-05 | hypermethylated |
| cg20072171 | 0.03724 | 0.302639459 | 3.022675 | 1.72E-06 | hypermethylated |
| cg07519873 | 0.03015 | 0.244727568 | 3.020947 | 1.58E-05 | hypermethylated |
| cg21748223 | 0.03156 | 0.256078378 | 3.020416 | 2.95E-06 | hypermethylated |
| cg24885417 | 0.0351  | 0.284570811 | 3.019245 | 8.04E-06 | hypermethylated |
| cg01995480 | 0.03597 | 0.2914      | 3.018135 | 2.85E-05 | hypermethylated |
| cg14487131 | 0.04399 | 0.356334595 | 3.017985 | 5.21E-06 | hypermethylated |
| cg12700904 | 0.03109 | 0.251603243 | 3.016628 | 4.94E-05 | hypermethylated |
| cg07193766 | 0.03643 | 0.294585946 | 3.01549  | 1.04E-05 | hypermethylated |
| cg04510512 | 0.0285  | 0.230151351 | 3.013549 | 2.27E-05 | hypermethylated |
| cg09360770 | 0.03973 | 0.320831892 | 3.013517 | 1.58E-05 | hypermethylated |
| cg24464397 | 0.02554 | 0.206171351 | 3.013013 | 5.07E-06 | hypermethylated |
| cg14562712 | 0.03466 | 0.279701622 | 3.012545 | 1.48E-05 | hypermethylated |
| cg07547000 | 0.02727 | 0.219733514 | 3.010368 | 1.20E-05 | hypermethylated |
| cg21239311 | 0.02723 | 0.219214595 | 3.009075 | 3.95E-06 | hypermethylated |
| cg24031355 | 0.03418 | 0.275035676 | 3.008394 | 3.21E-06 | hypermethylated |
| cg27260772 | 0.05721 | 0.460112432 | 3.007647 | 7.41E-07 | hypermethylated |
| cg10188823 | 0.03708 | 0.297854054 | 3.005892 | 1.12E-05 | hypermethylated |
| cg03132773 | 0.0279  | 0.224108108 | 3.005858 | 4.67E-06 | hypermethylated |
| cg12877251 | 0.03528 | 0.28314973  | 3.004643 | 4.30E-06 | hypermethylated |
| cg17535595 | 0.03803 | 0.304774595 | 3.002533 | 5.14E-06 | hypermethylated |
| cg26682580 | 0.03075 | 0.246424865 | 3.00249  | 4.86E-06 | hypermethylated |
| cg18630667 | 0.04923 | 0.394509189 | 3.002449 | 1.18E-06 | hypermethylated |
| cg14038391 | 0.03904 | 0.312726486 | 3.001876 | 1.14E-05 | hypermethylated |
| cg08466792 | 0.04737 | 0.379442703 | 3.001836 | 8.34E-07 | hypermethylated |
| cg05135549 | 0.04321 | 0.345655135 | 2.999896 | 8.10E-07 | hypermethylated |
| cg03159124 | 0.03169 | 0.25344973  | 2.9996   | 4.12E-06 | hypermethylated |
| cg04123776 | 0.03172 | 0.253559459 | 2.998859 | 2.10E-06 | hypermethylated |
| cg26521404 | 0.05372 | 0.429391351 | 2.998762 | 1.15E-06 | hypermethylated |
| cg26809635 | 0.04977 | 0.397658919 | 2.998183 | 5.00E-06 | hypermethylated |
| cg23180938 | 0.04213 | 0.336516216 | 2.997756 | 6.93E-06 | hypermethylated |
| cg18884037 | 0.02806 | 0.223842162 | 2.995895 | 6.22E-06 | hypermethylated |
| cg13611347 | 0.02698 | 0.214886486 | 2.993613 | 3.12E-06 | hypermethylated |
| cg02383130 | 0.03556 | 0.282741622 | 2.991157 | 2.91E-06 | hypermethylated |
| cg00557947 | 0.04086 | 0.324781622 | 2.990709 | 2.57E-06 | hypermethylated |
| cg15048991 | 0.0411  | 0.326648108 | 2.990527 | 2.95E-06 | hypermethylated |
| cg22603247 | 0.03965 | 0.314842162 | 2.989236 | 1.15E-05 | hypermethylated |
| cg18646207 | 0.0329  | 0.261092432 | 2.988401 | 7.72E-06 | hypermethylated |
| cg04669574 | 0.04049 | 0.321185405 | 2.987769 | 1.01E-05 | hypermethylated |
| cg13962212 | 0.03109 | 0.24650973  | 2.987122 | 4.67E-06 | hypermethylated |
| cg15630907 | 0.02616 | 0.207390811 | 2.986918 | 1.64E-05 | hypermethylated |
| cg07931411 | 0.02862 | 0.226869189 | 2.986765 | 1.93E-06 | hypermethylated |
| cg04784475 | 0.03512 | 0.278271892 | 2.98613  | 1.07E-06 | hypermethylated |
| cg08235864 | 0.03967 | 0.314092973 | 2.985071 | 3.17E-06 | hypermethylated |
| cg13794530 | 0.04833 | 0.382317838 | 2.983782 | 2.99E-06 | hypermethylated |
| cg08283882 | 0.03175 | 0.250992973 | 2.982818 | 4.70E-05 | hypermethylated |
| cg21779611 | 0.03537 | 0.279570811 | 2.982616 | 7.98E-07 | hypermethylated |

|            |         |             |          |          |                 |
|------------|---------|-------------|----------|----------|-----------------|
| cg25645268 | 0.03349 | 0.264268649 | 2.980203 | 8.34E-07 | hypermethylated |
| cg10800833 | 0.03536 | 0.278896216 | 2.979538 | 1.51E-06 | hypermethylated |
| cg21541833 | 0.03444 | 0.271522162 | 2.978913 | 2.95E-06 | hypermethylated |
| cg14394692 | 0.03307 | 0.260605946 | 2.978275 | 1.56E-06 | hypermethylated |
| cg26477573 | 0.03308 | 0.260246486 | 2.975848 | 0.000251 | hypermethylated |
| cg05151154 | 0.0457  | 0.358931351 | 2.973442 | 3.44E-06 | hypermethylated |
| cg05917460 | 0.03718 | 0.291755676 | 2.972162 | 9.07E-06 | hypermethylated |
| cg06785999 | 0.04251 | 0.333576757 | 2.972145 | 4.86E-06 | hypermethylated |
| cg25691167 | 0.05002 | 0.392491892 | 2.972086 | 1.93E-06 | hypermethylated |
| cg04846243 | 0.03238 | 0.253936757 | 2.971294 | 6.38E-05 | hypermethylated |
| cg02467990 | 0.05254 | 0.411698378 | 2.9701   | 3.35E-06 | hypermethylated |
| cg19619405 | 0.05335 | 0.417938378 | 2.96973  | 1.93E-06 | hypermethylated |
| cg20810478 | 0.05197 | 0.406935676 | 2.96905  | 1.99E-06 | hypermethylated |
| cg22049569 | 0.02526 | 0.197723243 | 2.968556 | 5.73E-06 | hypermethylated |
| cg20618622 | 0.03233 | 0.252998919 | 2.968186 | 1.99E-05 | hypermethylated |
| cg22773899 | 0.03364 | 0.26322     | 2.96802  | 2.87E-06 | hypermethylated |
| cg27277463 | 0.05032 | 0.393731351 | 2.968008 | 5.00E-06 | hypermethylated |
| cg25078150 | 0.03661 | 0.286446486 | 2.967956 | 1.40E-05 | hypermethylated |
| cg02809707 | 0.0334  | 0.261321081 | 2.967904 | 1.09E-05 | hypermethylated |
| cg19115272 | 0.02484 | 0.194277838 | 2.967384 | 3.54E-06 | hypermethylated |
| cg24245418 | 0.03907 | 0.30554     | 2.967228 | 4.36E-05 | hypermethylated |
| cg06382344 | 0.03446 | 0.269261622 | 2.966014 | 1.54E-06 | hypermethylated |
| cg18578405 | 0.03948 | 0.308407568 | 2.965644 | 2.36E-06 | hypermethylated |
| cg14485004 | 0.03117 | 0.243355676 | 2.964836 | 1.14E-05 | hypermethylated |
| cg19484420 | 0.04536 | 0.35411027  | 2.964706 | 1.29E-06 | hypermethylated |
| cg18063733 | 0.03566 | 0.278047027 | 2.96295  | 7.03E-06 | hypermethylated |
| cg25116216 | 0.03979 | 0.310014595 | 2.961858 | 3.49E-06 | hypermethylated |
| cg10152131 | 0.05281 | 0.411131351 | 2.960716 | 8.34E-07 | hypermethylated |
| cg15987088 | 0.02144 | 0.166506486 | 2.957202 | 4.33E-07 | hypermethylated |
| cg08575330 | 0.03467 | 0.269148649 | 2.956643 | 2.49E-06 | hypermethylated |
| cg22356339 | 0.03611 | 0.280272432 | 2.95636  | 3.74E-06 | hypermethylated |
| cg10293925 | 0.04133 | 0.320422703 | 2.954715 | 5.58E-06 | hypermethylated |
| cg07978472 | 0.04032 | 0.312471892 | 2.954159 | 3.26E-06 | hypermethylated |
| cg25973534 | 0.04186 | 0.324051892 | 2.952581 | 1.02E-05 | hypermethylated |
| cg14324370 | 0.03817 | 0.295123243 | 2.950806 | 1.08E-05 | hypermethylated |
| cg12219082 | 0.02974 | 0.229928649 | 2.95071  | 3.39E-06 | hypermethylated |
| cg15126544 | 0.03516 | 0.27167027  | 2.94985  | 4.42E-06 | hypermethylated |
| cg03315215 | 0.02745 | 0.212087568 | 2.949782 | 3.30E-06 | hypermethylated |
| cg08567279 | 0.03302 | 0.255077838 | 2.949526 | 1.93E-06 | hypermethylated |
| cg21885046 | 0.04278 | 0.330088649 | 2.947845 | 1.06E-05 | hypermethylated |
| cg09524455 | 0.02976 | 0.229128108 | 2.944708 | 5.43E-06 | hypermethylated |
| cg18932798 | 0.04046 | 0.311421622 | 2.944301 | 3.12E-06 | hypermethylated |
| cg07881405 | 0.04357 | 0.33492973  | 2.942451 | 2.71E-06 | hypermethylated |
| cg19497031 | 0.04261 | 0.326913514 | 2.939645 | 1.88E-06 | hypermethylated |
| cg25723050 | 0.0377  | 0.288954595 | 2.938206 | 2.51E-05 | hypermethylated |
| cg05888917 | 0.03051 | 0.233708649 | 2.937357 | 8.83E-06 | hypermethylated |
| cg08857144 | 0.04001 | 0.306332432 | 2.936666 | 9.69E-06 | hypermethylated |
| cg15556502 | 0.04425 | 0.338441081 | 2.935155 | 2.49E-06 | hypermethylated |
| cg02237470 | 0.03994 | 0.30532973  | 2.934462 | 1.11E-05 | hypermethylated |
| cg11501438 | 0.02565 | 0.196015676 | 2.933938 | 3.79E-06 | hypermethylated |
| cg27528510 | 0.04134 | 0.315697838 | 2.932934 | 1.20E-05 | hypermethylated |
| cg08228703 | 0.03159 | 0.24112     | 2.932211 | 2.10E-06 | hypermethylated |
| cg17003293 | 0.03346 | 0.255147027 | 2.930819 | 8.15E-06 | hypermethylated |
| cg09813525 | 0.04624 | 0.352534595 | 2.930552 | 3.59E-06 | hypermethylated |
| cg19358877 | 0.03782 | 0.288067568 | 2.929186 | 1.31E-05 | hypermethylated |
| cg03276408 | 0.03456 | 0.262781622 | 2.926689 | 1.93E-06 | hypermethylated |
| cg07147449 | 0.04038 | 0.306410811 | 2.923754 | 1.84E-05 | hypermethylated |
| cg05338433 | 0.03139 | 0.237983784 | 2.922486 | 2.29E-06 | hypermethylated |

|            |         |             |          |          |                 |
|------------|---------|-------------|----------|----------|-----------------|
| cg21929943 | 0.03312 | 0.251075676 | 2.922348 | 7.22E-06 | hypermethylated |
| cg01743841 | 0.0493  | 0.373670811 | 2.922108 | 1.20E-05 | hypermethylated |
| cg24416513 | 0.06043 | 0.457792432 | 2.921357 | 1.01E-06 | hypermethylated |
| cg09971314 | 0.05247 | 0.397407027 | 2.921053 | 2.46E-06 | hypermethylated |
| cg26132774 | 0.05377 | 0.407224865 | 2.920952 | 1.58E-06 | hypermethylated |
| cg07770968 | 0.04521 | 0.342394054 | 2.920944 | 7.72E-06 | hypermethylated |
| cg15262242 | 0.03499 | 0.264660541 | 2.919129 | 3.35E-06 | hypermethylated |
| cg00908291 | 0.03476 | 0.262794595 | 2.918436 | 1.44E-05 | hypermethylated |
| cg26122980 | 0.04971 | 0.375630811 | 2.917707 | 3.44E-06 | hypermethylated |
| cg11825621 | 0.03672 | 0.277167027 | 2.916118 | 0.000248 | hypermethylated |
| cg15313459 | 0.03678 | 0.277603243 | 2.916031 | 1.87E-05 | hypermethylated |
| cg22232327 | 0.03602 | 0.271744865 | 2.915383 | 8.37E-06 | hypermethylated |
| cg26938597 | 0.02817 | 0.21236973  | 2.914347 | 3.49E-06 | hypermethylated |
| cg03401357 | 0.03555 | 0.268003784 | 2.914332 | 2.92E-05 | hypermethylated |
| cg22830113 | 0.04943 | 0.371808108 | 2.911099 | 2.57E-05 | hypermethylated |
| cg19047292 | 0.03499 | 0.263185946 | 2.911068 | 3.69E-06 | hypermethylated |
| cg20072442 | 0.03158 | 0.237379459 | 2.910112 | 7.52E-06 | hypermethylated |
| cg05627639 | 0.05689 | 0.427450811 | 2.909511 | 3.49E-06 | hypermethylated |
| cg23524195 | 0.03451 | 0.259200541 | 2.908982 | 3.30E-06 | hypermethylated |
| cg16002355 | 0.04073 | 0.305846486 | 2.908644 | 8.71E-06 | hypermethylated |
| cg08753373 | 0.03779 | 0.283541081 | 2.907481 | 7.03E-06 | hypermethylated |
| cg11979589 | 0.03261 | 0.244559459 | 2.906799 | 2.74E-05 | hypermethylated |
| cg14768785 | 0.03343 | 0.250374595 | 2.904873 | 9.66E-07 | hypermethylated |
| cg02483484 | 0.02701 | 0.201768108 | 2.901133 | 3.79E-06 | hypermethylated |
| cg07113642 | 0.05773 | 0.431088108 | 2.90059  | 3.21E-06 | hypermethylated |
| cg24362812 | 0.04386 | 0.327264865 | 2.899481 | 4.24E-06 | hypermethylated |
| cg18627360 | 0.03658 | 0.272935676 | 2.899434 | 7.83E-06 | hypermethylated |
| cg03376794 | 0.0373  | 0.278296757 | 2.899377 | 1.39E-06 | hypermethylated |
| cg03595755 | 0.03015 | 0.224936757 | 2.89929  | 2.10E-05 | hypermethylated |
| cg14146100 | 0.02473 | 0.18443027  | 2.898741 | 3.17E-06 | hypermethylated |
| cg23054189 | 0.05674 | 0.423013514 | 2.898266 | 2.87E-06 | hypermethylated |
| cg05376374 | 0.05202 | 0.387792432 | 2.898146 | 3.39E-06 | hypermethylated |
| cg08870743 | 0.04137 | 0.308294595 | 2.897653 | 3.49E-06 | hypermethylated |
| cg09385093 | 0.03718 | 0.276811351 | 2.896304 | 1.21E-05 | hypermethylated |
| cg13481132 | 0.03966 | 0.295104324 | 2.895468 | 5.14E-06 | hypermethylated |
| cg12908522 | 0.02286 | 0.169964865 | 2.894339 | 2.46E-06 | hypermethylated |
| cg08939095 | 0.04096 | 0.304413514 | 2.893745 | 2.39E-06 | hypermethylated |
| cg07976064 | 0.05175 | 0.384470811 | 2.893243 | 1.67E-06 | hypermethylated |
| cg08893692 | 0.05094 | 0.378226486 | 2.89238  | 5.34E-07 | hypermethylated |
| cg20691140 | 0.02969 | 0.220282703 | 2.891307 | 3.59E-06 | hypermethylated |
| cg21511365 | 0.03403 | 0.252428108 | 2.890994 | 1.75E-05 | hypermethylated |
| cg26789779 | 0.03817 | 0.283005405 | 2.890319 | 1.42E-05 | hypermethylated |
| cg05560435 | 0.04026 | 0.29800973  | 2.88794  | 3.30E-06 | hypermethylated |
| cg13458645 | 0.03542 | 0.26172     | 2.885388 | 8.71E-06 | hypermethylated |
| cg22435300 | 0.02256 | 0.166583243 | 2.884404 | 1.40E-05 | hypermethylated |
| cg00596508 | 0.03345 | 0.24667027  | 2.882506 | 6.15E-05 | hypermethylated |
| cg08004425 | 0.04066 | 0.299628649 | 2.881493 | 1.58E-06 | hypermethylated |
| cg04658772 | 0.03058 | 0.225285946 | 2.881097 | 2.92E-05 | hypermethylated |
| cg16021909 | 0.05529 | 0.407109189 | 2.880325 | 2.42E-06 | hypermethylated |
| cg09238180 | 0.04752 | 0.349856757 | 2.880158 | 2.26E-06 | hypermethylated |
| cg20803857 | 0.04204 | 0.309124324 | 2.878353 | 2.07E-05 | hypermethylated |
| cg12973591 | 0.03813 | 0.2802      | 2.877459 | 1.42E-05 | hypermethylated |
| cg09507526 | 0.03466 | 0.25452     | 2.876435 | 5.14E-06 | hypermethylated |
| cg18206027 | 0.04824 | 0.354236757 | 2.876412 | 3.44E-06 | hypermethylated |
| cg15034345 | 0.04472 | 0.328235135 | 2.875738 | 3.74E-06 | hypermethylated |
| cg05901579 | 0.04924 | 0.361169189 | 2.874772 | 4.07E-06 | hypermethylated |
| cg20279673 | 0.02796 | 0.204876216 | 2.873316 | 3.85E-06 | hypermethylated |
| cg00001747 | 0.05107 | 0.374171351 | 2.873151 | 4.80E-06 | hypermethylated |

|            |         |             |          |          |                 |
|------------|---------|-------------|----------|----------|-----------------|
| cg06463958 | 0.04369 | 0.319896216 | 2.872229 | 4.48E-06 | hypermethylated |
| cg25936054 | 0.04572 | 0.334546486 | 2.871309 | 3.39E-06 | hypermethylated |
| cg05663341 | 0.04079 | 0.298314054 | 2.870545 | 0.00013  | hypermethylated |
| cg16295725 | 0.05138 | 0.375684865 | 2.870244 | 1.46E-05 | hypermethylated |
| cg15051226 | 0.03103 | 0.226845405 | 2.869974 | 2.10E-06 | hypermethylated |
| cg04865180 | 0.04956 | 0.36203027  | 2.868862 | 3.04E-06 | hypermethylated |
| cg26814276 | 0.04111 | 0.300290811 | 2.868799 | 2.71E-06 | hypermethylated |
| cg08313939 | 0.04439 | 0.324112432 | 2.868188 | 1.22E-06 | hypermethylated |
| cg03714619 | 0.04883 | 0.356511892 | 2.868111 | 1.27E-06 | hypermethylated |
| cg25366582 | 0.03724 | 0.271891892 | 2.868108 | 1.02E-05 | hypermethylated |
| cg14287112 | 0.03437 | 0.250454054 | 2.865324 | 9.82E-06 | hypermethylated |
| cg11664500 | 0.03585 | 0.261085405 | 2.864477 | 8.83E-06 | hypermethylated |
| cg27199820 | 0.04463 | 0.325022162 | 2.864452 | 3.49E-06 | hypermethylated |
| cg06288251 | 0.03909 | 0.284506486 | 2.86359  | 1.02E-05 | hypermethylated |
| cg14306734 | 0.03728 | 0.271187568 | 2.862817 | 0.000283 | hypermethylated |
| cg11334771 | 0.04387 | 0.318865946 | 2.861643 | 2.02E-06 | hypermethylated |
| cg20185017 | 0.04415 | 0.320878919 | 2.861544 | 7.32E-06 | hypermethylated |
| cg05809668 | 0.05459 | 0.396662162 | 2.861202 | 1.35E-06 | hypermethylated |
| cg03940848 | 0.03582 | 0.260227027 | 2.860934 | 2.81E-05 | hypermethylated |
| cg04347874 | 0.0607  | 0.44034     | 2.858849 | 2.02E-06 | hypermethylated |
| cg21517947 | 0.0463  | 0.335619459 | 2.857742 | 1.35E-05 | hypermethylated |
| cg05298922 | 0.03977 | 0.288272973 | 2.857683 | 1.28E-05 | hypermethylated |
| cg01956420 | 0.05163 | 0.373916216 | 2.856434 | 9.31E-06 | hypermethylated |
| cg05085230 | 0.03398 | 0.245962162 | 2.855679 | 1.39E-05 | hypermethylated |
| cg09195198 | 0.03735 | 0.270116757 | 2.854403 | 2.61E-05 | hypermethylated |
| cg11985360 | 0.03143 | 0.227227568 | 2.853924 | 4.36E-06 | hypermethylated |
| cg21093192 | 0.04394 | 0.316724324 | 2.849621 | 4.54E-06 | hypermethylated |
| cg15975865 | 0.04992 | 0.359716216 | 2.849169 | 2.56E-06 | hypermethylated |
| cg06419761 | 0.03313 | 0.23868973  | 2.848926 | 1.39E-05 | hypermethylated |
| cg03307465 | 0.03701 | 0.266493514 | 2.848113 | 8.37E-06 | hypermethylated |
| cg18786873 | 0.04465 | 0.321227568 | 2.846864 | 1.41E-06 | hypermethylated |
| cg23048481 | 0.0312  | 0.224311351 | 2.845885 | 2.83E-06 | hypermethylated |
| cg16172814 | 0.03686 | 0.264946486 | 2.845573 | 5.43E-06 | hypermethylated |
| cg19679633 | 0.04566 | 0.328113514 | 2.845192 | 1.99E-06 | hypermethylated |
| cg13088368 | 0.02721 | 0.195454054 | 2.844621 | 7.62E-06 | hypermethylated |
| cg16856286 | 0.05066 | 0.363881622 | 2.84455  | 3.54E-06 | hypermethylated |
| cg17741501 | 0.05003 | 0.359264865 | 2.844182 | 2.95E-06 | hypermethylated |
| cg22409854 | 0.03404 | 0.244395135 | 2.843913 | 5.43E-06 | hypermethylated |
| cg14473327 | 0.03433 | 0.24642973  | 2.843635 | 1.52E-05 | hypermethylated |
| cg14441976 | 0.04473 | 0.320783243 | 2.842284 | 7.52E-06 | hypermethylated |
| cg07926691 | 0.04629 | 0.331957297 | 2.842225 | 3.21E-06 | hypermethylated |
| cg23778596 | 0.03675 | 0.263292432 | 2.84085  | 1.42E-05 | hypermethylated |
| cg13445796 | 0.05827 | 0.417221622 | 2.839989 | 1.77E-06 | hypermethylated |
| cg19492047 | 0.03659 | 0.261884865 | 2.839411 | 8.04E-06 | hypermethylated |
| cg05663573 | 0.04064 | 0.290642162 | 2.838272 | 3.35E-06 | hypermethylated |
| cg23847381 | 0.03282 | 0.234646486 | 2.837842 | 2.96E-05 | hypermethylated |
| cg01638213 | 0.04956 | 0.354203784 | 2.837332 | 3.59E-06 | hypermethylated |
| cg19513834 | 0.05065 | 0.361947568 | 2.837147 | 1.15E-06 | hypermethylated |
| cg09797577 | 0.04914 | 0.351063243 | 2.836761 | 2.83E-06 | hypermethylated |
| cg23243867 | 0.04865 | 0.347517297 | 2.836573 | 1.04E-05 | hypermethylated |
| cg18507379 | 0.05044 | 0.360178378 | 2.836071 | 4.54E-06 | hypermethylated |
| cg04568492 | 0.03954 | 0.282264324 | 2.835662 | 4.80E-06 | hypermethylated |
| cg14216285 | 0.03055 | 0.217931892 | 2.834633 | 4.01E-06 | hypermethylated |
| cg12412079 | 0.03515 | 0.250735676 | 2.834571 | 2.24E-05 | hypermethylated |
| cg19875547 | 0.05103 | 0.363954595 | 2.834341 | 6.57E-06 | hypermethylated |
| cg24820783 | 0.03826 | 0.272846486 | 2.834181 | 6.39E-06 | hypermethylated |
| cg13539545 | 0.06287 | 0.448302162 | 2.834028 | 1.12E-06 | hypermethylated |
| cg05523056 | 0.03051 | 0.217552432 | 2.834009 | 1.08E-05 | hypermethylated |

|            |         |             |          |          |                 |
|------------|---------|-------------|----------|----------|-----------------|
| cg20935165 | 0.04644 | 0.330705405 | 2.832107 | 4.12E-06 | hypermethylated |
| cg02087954 | 0.04154 | 0.29558973  | 2.831023 | 2.38E-05 | hypermethylated |
| cg05446629 | 0.056   | 0.398099459 | 2.82963  | 4.36E-06 | hypermethylated |
| cg03063639 | 0.05964 | 0.423968108 | 2.829604 | 3.12E-06 | hypermethylated |
| cg14649650 | 0.04419 | 0.313718378 | 2.827678 | 4.80E-06 | hypermethylated |
| cg11357746 | 0.03184 | 0.225995135 | 2.827379 | 4.48E-06 | hypermethylated |
| cg25950112 | 0.04303 | 0.305224865 | 2.826458 | 1.15E-06 | hypermethylated |
| cg25474372 | 0.04181 | 0.296457838 | 2.825907 | 5.28E-06 | hypermethylated |
| cg27058257 | 0.06026 | 0.427028649 | 2.82506  | 5.14E-06 | hypermethylated |
| cg06118384 | 0.03296 | 0.233527568 | 2.824805 | 7.32E-06 | hypermethylated |
| cg13912117 | 0.05109 | 0.36194     | 2.824638 | 6.48E-06 | hypermethylated |
| cg26650846 | 0.03769 | 0.266973514 | 2.824443 | 1.28E-05 | hypermethylated |
| cg02081266 | 0.04413 | 0.312207568 | 2.822674 | 8.60E-06 | hypermethylated |
| cg06585708 | 0.04278 | 0.302514595 | 2.821996 | 1.12E-06 | hypermethylated |
| cg18725867 | 0.04993 | 0.353073514 | 2.82199  | 1.05E-06 | hypermethylated |
| cg06094615 | 0.03653 | 0.258254595 | 2.82164  | 3.96E-06 | hypermethylated |
| cg17386093 | 0.0277  | 0.195547027 | 2.819558 | 7.12E-06 | hypermethylated |
| cg05766140 | 0.04308 | 0.304038919 | 2.819166 | 3.74E-06 | hypermethylated |
| cg05593641 | 0.04781 | 0.337231351 | 2.818354 | 5.14E-06 | hypermethylated |
| cg02881570 | 0.04405 | 0.31046     | 2.817193 | 1.31E-05 | hypermethylated |
| cg08696727 | 0.03912 | 0.275666486 | 2.816946 | 0.000454 | hypermethylated |
| cg27655158 | 0.03608 | 0.254148108 | 2.816398 | 3.04E-05 | hypermethylated |
| cg15584445 | 0.02609 | 0.18376973  | 2.81633  | 2.56E-06 | hypermethylated |
| cg03951219 | 0.04733 | 0.333215135 | 2.815627 | 3.12E-06 | hypermethylated |
| cg19909349 | 0.05135 | 0.361492432 | 2.815529 | 3.54E-06 | hypermethylated |
| cg27501878 | 0.05141 | 0.361816216 | 2.815136 | 8.71E-06 | hypermethylated |
| cg26079753 | 0.04452 | 0.313217297 | 2.814638 | 1.01E-05 | hypermethylated |
| cg03779241 | 0.04038 | 0.284002162 | 2.814189 | 3.90E-06 | hypermethylated |
| cg21331088 | 0.0417  | 0.29315027  | 2.813521 | 1.48E-05 | hypermethylated |
| cg06829686 | 0.04975 | 0.34961027  | 2.812979 | 5.00E-06 | hypermethylated |
| cg10715265 | 0.03689 | 0.259214595 | 2.812845 | 0.000135 | hypermethylated |
| cg18318649 | 0.04481 | 0.314772973 | 2.812419 | 4.12E-06 | hypermethylated |
| cg08063125 | 0.04114 | 0.28876973  | 2.811306 | 8.37E-06 | hypermethylated |
| cg22954449 | 0.05789 | 0.406337297 | 2.811292 | 7.52E-06 | hypermethylated |
| cg01360618 | 0.05453 | 0.382629189 | 2.810825 | 4.36E-06 | hypermethylated |
| cg14230666 | 0.04564 | 0.320202703 | 2.810615 | 3.21E-06 | hypermethylated |
| cg10903903 | 0.0628  | 0.440592432 | 2.810608 | 3.85E-06 | hypermethylated |
| cg02023345 | 0.04036 | 0.28312973  | 2.810465 | 5.00E-06 | hypermethylated |
| cg04012266 | 0.03543 | 0.248534054 | 2.8104   | 1.84E-05 | hypermethylated |
| cg17754510 | 0.04744 | 0.332716216 | 2.810116 | 2.99E-06 | hypermethylated |
| cg22759823 | 0.06305 | 0.441708108 | 2.808525 | 1.63E-06 | hypermethylated |
| cg18403551 | 0.03876 | 0.271477838 | 2.808194 | 2.42E-06 | hypermethylated |
| cg03227184 | 0.04069 | 0.284964324 | 2.808035 | 1.02E-06 | hypermethylated |
| cg26492446 | 0.0588  | 0.411760541 | 2.807918 | 5.73E-06 | hypermethylated |
| cg16364121 | 0.04569 | 0.319722703 | 2.806871 | 1.94E-05 | hypermethylated |
| cg00530925 | 0.03669 | 0.256738378 | 2.80684  | 1.18E-05 | hypermethylated |
| cg23318063 | 0.04633 | 0.324152432 | 2.806654 | 7.22E-06 | hypermethylated |
| cg13759674 | 0.04486 | 0.313769189 | 2.806202 | 0.00032  | hypermethylated |
| cg19456540 | 0.04935 | 0.344897838 | 2.805047 | 3.49E-06 | hypermethylated |
| cg07972135 | 0.04113 | 0.287251892 | 2.804053 | 1.02E-05 | hypermethylated |
| cg01893212 | 0.06167 | 0.430684324 | 2.80399  | 7.42E-06 | hypermethylated |
| cg13601435 | 0.05374 | 0.374987568 | 2.802775 | 2.02E-05 | hypermethylated |
| cg23291301 | 0.05208 | 0.363361622 | 2.802605 | 2.71E-06 | hypermethylated |
| cg04205107 | 0.02783 | 0.194137297 | 2.802364 | 8.83E-06 | hypermethylated |
| cg14603098 | 0.05256 | 0.366501081 | 2.80178  | 2.95E-06 | hypermethylated |
| cg09022422 | 0.04195 | 0.292477297 | 2.801582 | 6.93E-06 | hypermethylated |
| cg20474271 | 0.03424 | 0.238721081 | 2.801571 | 1.46E-05 | hypermethylated |
| cg24407243 | 0.02424 | 0.168982703 | 2.801414 | 7.41E-07 | hypermethylated |



|            |         |             |          |          |                 |
|------------|---------|-------------|----------|----------|-----------------|
| cg22871668 | 0.03602 | 0.251055135 | 2.801134 | 1.58E-05 | hypermethylated |
| cg20276585 | 0.03582 | 0.249561622 | 2.800559 | 5.65E-05 | hypermethylated |
| cg21956337 | 0.03923 | 0.273049189 | 2.799132 | 1.75E-06 | hypermethylated |
| cg05923687 | 0.03616 | 0.251658919 | 2.799003 | 3.85E-06 | hypermethylated |
| cg03238797 | 0.04118 | 0.286534054 | 2.798691 | 6.30E-06 | hypermethylated |
| cg14492293 | 0.03145 | 0.218565405 | 2.796933 | 5.97E-06 | hypermethylated |
| cg14060496 | 0.05212 | 0.362098919 | 2.796475 | 4.48E-06 | hypermethylated |
| cg04184836 | 0.04957 | 0.344265405 | 2.795982 | 7.12E-06 | hypermethylated |
| cg15808943 | 0.04996 | 0.34680973  | 2.795299 | 1.90E-06 | hypermethylated |
| cg14944647 | 0.04598 | 0.319118378 | 2.795013 | 3.96E-06 | hypermethylated |
| cg15672437 | 0.05289 | 0.366681622 | 2.793461 | 3.49E-06 | hypermethylated |
| cg06746118 | 0.04499 | 0.311884324 | 2.793335 | 6.08E-05 | hypermethylated |
| cg04332534 | 0.04714 | 0.326712973 | 2.793    | 1.93E-06 | hypermethylated |
| cg20718350 | 0.04791 | 0.331803784 | 2.791932 | 1.44E-05 | hypermethylated |
| cg17429382 | 0.03983 | 0.275828649 | 2.791845 | 9.19E-06 | hypermethylated |
| cg11260904 | 0.02906 | 0.201144324 | 2.791124 | 1.42E-05 | hypermethylated |
| cg14765959 | 0.04844 | 0.335226486 | 2.790865 | 6.66E-06 | hypermethylated |
| cg00268840 | 0.04198 | 0.290402703 | 2.790281 | 6.01E-05 | hypermethylated |
| cg17541528 | 0.05453 | 0.377077838 | 2.78974  | 1.12E-05 | hypermethylated |
| cg10334767 | 0.049   | 0.338802703 | 2.789592 | 1.52E-05 | hypermethylated |
| cg05630016 | 0.04074 | 0.281680541 | 2.789542 | 6.48E-06 | hypermethylated |
| cg11878331 | 0.04846 | 0.33498973  | 2.789251 | 1.22E-06 | hypermethylated |
| cg08722774 | 0.02949 | 0.203682162 | 2.788022 | 2.71E-05 | hypermethylated |
| cg05310764 | 0.03439 | 0.237396216 | 2.787236 | 2.02E-06 | hypermethylated |
| cg22295787 | 0.03575 | 0.246558378 | 2.785914 | 4.18E-06 | hypermethylated |
| cg27600205 | 0.04581 | 0.315883243 | 2.785657 | 7.32E-06 | hypermethylated |
| cg07188591 | 0.04106 | 0.282947568 | 2.784729 | 1.05E-05 | hypermethylated |
| cg25113237 | 0.05157 | 0.355304865 | 2.784453 | 6.99E-07 | hypermethylated |
| cg04475027 | 0.05089 | 0.350292432 | 2.783106 | 3.30E-06 | hypermethylated |
| cg26419728 | 0.03277 | 0.225435135 | 2.782265 | 5.89E-06 | hypermethylated |
| cg15228928 | 0.04971 | 0.341662703 | 2.780965 | 3.69E-06 | hypermethylated |
| cg04917181 | 0.04204 | 0.288933514 | 2.780903 | 9.95E-05 | hypermethylated |
| cg06715976 | 0.04224 | 0.290171892 | 2.780226 | 0.000147 | hypermethylated |
| cg01052879 | 0.03636 | 0.249693514 | 2.779734 | 9.19E-06 | hypermethylated |
| cg08806408 | 0.04052 | 0.278127027 | 2.779038 | 4.36E-06 | hypermethylated |
| cg16376000 | 0.04224 | 0.289925405 | 2.779    | 5.86E-05 | hypermethylated |
| cg13839457 | 0.05474 | 0.375716216 | 2.778976 | 2.30E-05 | hypermethylated |
| cg23383871 | 0.03927 | 0.26938973  | 2.778195 | 1.04E-05 | hypermethylated |
| cg15031661 | 0.06249 | 0.428596757 | 2.777924 | 5.81E-06 | hypermethylated |
| cg26134895 | 0.05675 | 0.388614054 | 2.775646 | 1.60E-05 | hypermethylated |
| cg06122635 | 0.0442  | 0.302611351 | 2.775348 | 5.28E-06 | hypermethylated |
| cg25039722 | 0.04849 | 0.331979459 | 2.775335 | 1.09E-05 | hypermethylated |
| cg02214096 | 0.02849 | 0.195044324 | 2.775274 | 2.99E-06 | hypermethylated |
| cg04021697 | 0.05538 | 0.379034054 | 2.774891 | 4.12E-06 | hypermethylated |
| cg07068756 | 0.05105 | 0.349357838 | 2.774723 | 8.83E-06 | hypermethylated |
| cg03709091 | 0.03947 | 0.270102703 | 2.77468  | 6.95E-05 | hypermethylated |
| cg13267264 | 0.06226 | 0.425493514 | 2.77276  | 4.12E-06 | hypermethylated |
| cg20648847 | 0.02837 | 0.193870811 | 2.772658 | 4.82E-05 | hypermethylated |
| cg24266670 | 0.05475 | 0.374095676 | 2.772476 | 1.04E-05 | hypermethylated |
| cg16987305 | 0.05104 | 0.348741081 | 2.772456 | 1.23E-05 | hypermethylated |
| cg19570244 | 0.05154 | 0.352071351 | 2.772103 | 5.89E-06 | hypermethylated |
| cg02012703 | 0.06481 | 0.442557297 | 2.771576 | 3.54E-06 | hypermethylated |
| cg05874732 | 0.03777 | 0.257911892 | 2.771566 | 1.45E-06 | hypermethylated |
| cg16435571 | 0.0371  | 0.253259459 | 2.771125 | 6.57E-06 | hypermethylated |
| cg22868282 | 0.04229 | 0.288611351 | 2.77074  | 9.31E-06 | hypermethylated |
| cg24980653 | 0.07002 | 0.477807027 | 2.770589 | 4.01E-06 | hypermethylated |
| cg18673954 | 0.04176 | 0.284963243 | 2.770582 | 7.83E-06 | hypermethylated |
| cg16150752 | 0.04635 | 0.316120541 | 2.769834 | 6.22E-06 | hypermethylated |

|            |         |             |          |          |                 |
|------------|---------|-------------|----------|----------|-----------------|
| cg19939997 | 0.02969 | 0.202414595 | 2.769264 | 1.62E-05 | hypermethylated |
| cg18621091 | 0.03188 | 0.217321622 | 2.769108 | 7.62E-06 | hypermethylated |
| cg19144684 | 0.03263 | 0.222338919 | 2.76849  | 3.04E-06 | hypermethylated |
| cg08876932 | 0.03845 | 0.261796216 | 2.767389 | 4.15E-05 | hypermethylated |
| cg17059658 | 0.06205 | 0.422365405 | 2.766989 | 1.33E-06 | hypermethylated |
| cg15409013 | 0.04061 | 0.276224865 | 2.765936 | 1.14E-05 | hypermethylated |
| cg10541517 | 0.03306 | 0.224624865 | 2.764359 | 5.89E-06 | hypermethylated |
| cg17380661 | 0.04818 | 0.326843784 | 2.762095 | 1.30E-05 | hypermethylated |
| cg22517656 | 0.03594 | 0.243760541 | 2.761802 | 8.15E-06 | hypermethylated |
| cg05206884 | 0.05837 | 0.395816216 | 2.761532 | 4.01E-06 | hypermethylated |
| cg20980055 | 0.02805 | 0.190195676 | 2.761412 | 7.32E-06 | hypermethylated |
| cg12892506 | 0.04687 | 0.317708108 | 2.760965 | 2.16E-06 | hypermethylated |
| cg20146541 | 0.06456 | 0.437543784 | 2.760715 | 1.90E-06 | hypermethylated |
| cg01200640 | 0.04218 | 0.285833514 | 2.760544 | 1.41E-06 | hypermethylated |
| cg08182446 | 0.05006 | 0.339055676 | 2.759792 | 2.95E-06 | hypermethylated |
| cg16993043 | 0.03946 | 0.267116757 | 2.759008 | 1.75E-05 | hypermethylated |
| cg10658542 | 0.04379 | 0.296367568 | 2.758714 | 8.04E-06 | hypermethylated |
| cg17391928 | 0.04881 | 0.330317838 | 2.758606 | 3.90E-06 | hypermethylated |
| cg19579167 | 0.03853 | 0.260694054 | 2.758304 | 8.03E-05 | hypermethylated |
| cg03700449 | 0.04475 | 0.302725946 | 2.758053 | 5.14E-06 | hypermethylated |
| cg05223720 | 0.04994 | 0.337785405 | 2.757839 | 7.12E-06 | hypermethylated |
| cg13764991 | 0.03677 | 0.248697838 | 2.757793 | 8.48E-06 | hypermethylated |
| cg12300724 | 0.04168 | 0.281894595 | 2.757729 | 2.32E-05 | hypermethylated |
| cg25987923 | 0.03155 | 0.213376757 | 2.757691 | 1.02E-05 | hypermethylated |
| cg24847829 | 0.05442 | 0.367744865 | 2.756496 | 5.14E-06 | hypermethylated |
| cg12162138 | 0.0507  | 0.342576216 | 2.756367 | 4.36E-06 | hypermethylated |
| cg13139972 | 0.0464  | 0.312935676 | 2.753669 | 5.51E-05 | hypermethylated |
| cg08066943 | 0.03999 | 0.269617297 | 2.753202 | 1.96E-06 | hypermethylated |
| cg22763718 | 0.04909 | 0.330834054 | 2.752607 | 3.49E-06 | hypermethylated |
| cg08190858 | 0.05291 | 0.356522703 | 2.752382 | 3.30E-06 | hypermethylated |
| cg10036918 | 0.02864 | 0.192948108 | 2.75211  | 3.62E-05 | hypermethylated |
| cg25644556 | 0.05223 | 0.351751351 | 2.751605 | 1.94E-05 | hypermethylated |
| cg06616729 | 0.05617 | 0.378175135 | 2.751183 | 3.69E-06 | hypermethylated |
| cg23235241 | 0.04606 | 0.310059459 | 2.750959 | 3.12E-06 | hypermethylated |
| cg17509220 | 0.04871 | 0.327636216 | 2.749805 | 5.50E-06 | hypermethylated |
| cg06653699 | 0.03774 | 0.253542703 | 2.748062 | 8.37E-06 | hypermethylated |
| cg26272270 | 0.03458 | 0.23231027  | 2.748043 | 6.39E-06 | hypermethylated |
| cg04454951 | 0.05165 | 0.346812973 | 2.747318 | 2.71E-06 | hypermethylated |
| cg20340508 | 0.05217 | 0.350166486 | 2.746749 | 4.67E-06 | hypermethylated |
| cg13692446 | 0.05135 | 0.344662162 | 2.746747 | 1.26E-06 | hypermethylated |
| cg26777883 | 0.04576 | 0.306772432 | 2.74501  | 8.26E-06 | hypermethylated |
| cg15509687 | 0.03574 | 0.239559459 | 2.744772 | 1.77E-05 | hypermethylated |
| cg23462956 | 0.02674 | 0.179144865 | 2.744055 | 4.01E-06 | hypermethylated |
| cg19369022 | 0.04468 | 0.299025946 | 2.74257  | 3.90E-06 | hypermethylated |
| cg06338562 | 0.04129 | 0.276308108 | 2.742414 | 2.38E-05 | hypermethylated |
| cg14007067 | 0.03994 | 0.267083243 | 2.741383 | 2.64E-06 | hypermethylated |
| cg24928391 | 0.04114 | 0.274993514 | 2.740784 | 5.58E-05 | hypermethylated |
| cg01870995 | 0.03527 | 0.235627027 | 2.739992 | 1.87E-05 | hypermethylated |
| cg11328303 | 0.04575 | 0.305573514 | 2.739676 | 4.60E-06 | hypermethylated |
| cg09118932 | 0.05322 | 0.355399459 | 2.739401 | 3.64E-06 | hypermethylated |
| cg09969277 | 0.05796 | 0.386924865 | 2.738924 | 1.65E-06 | hypermethylated |
| cg23089825 | 0.05656 | 0.377111351 | 2.737137 | 1.72E-06 | hypermethylated |
| cg18082337 | 0.05654 | 0.376940541 | 2.736993 | 1.88E-06 | hypermethylated |
| cg09537620 | 0.04709 | 0.313677297 | 2.735788 | 1.93E-06 | hypermethylated |
| cg00058329 | 0.04537 | 0.30219027  | 2.735647 | 1.54E-05 | hypermethylated |
| cg26692294 | 0.04367 | 0.290751351 | 2.735071 | 6.31E-05 | hypermethylated |
| cg03611452 | 0.05091 | 0.338530811 | 2.733266 | 2.57E-06 | hypermethylated |
| cg20979852 | 0.045   | 0.299221081 | 2.733215 | 6.05E-06 | hypermethylated |

|            |         |             |          |          |                 |
|------------|---------|-------------|----------|----------|-----------------|
| cg18380175 | 0.03963 | 0.263452973 | 2.732881 | 6.13E-06 | hypermethylated |
| cg17290701 | 0.04224 | 0.280615676 | 2.731914 | 3.27E-05 | hypermethylated |
| cg26460092 | 0.05934 | 0.393770811 | 2.730279 | 1.77E-05 | hypermethylated |
| cg04209911 | 0.03685 | 0.244496216 | 2.730076 | 1.09E-05 | hypermethylated |
| cg04245645 | 0.0344  | 0.228228649 | 2.729999 | 6.39E-06 | hypermethylated |
| cg09123431 | 0.03371 | 0.223575135 | 2.729511 | 5.65E-06 | hypermethylated |
| cg02400740 | 0.03712 | 0.246082162 | 2.728871 | 1.54E-06 | hypermethylated |
| cg08322102 | 0.05125 | 0.339701081 | 2.728642 | 1.04E-05 | hypermethylated |
| cg14507337 | 0.04541 | 0.300924324 | 2.728319 | 1.62E-05 | hypermethylated |
| cg26551913 | 0.04553 | 0.301538378 | 2.727452 | 1.18E-05 | hypermethylated |
| cg12505170 | 0.05462 | 0.361622162 | 2.726982 | 3.85E-06 | hypermethylated |
| cg16521917 | 0.04723 | 0.312651351 | 2.726779 | 6.75E-06 | hypermethylated |
| cg09728607 | 0.02551 | 0.168815676 | 2.726314 | 2.53E-06 | hypermethylated |
| cg10448808 | 0.04587 | 0.303484865 | 2.726002 | 2.83E-06 | hypermethylated |
| cg10168149 | 0.05383 | 0.356108108 | 2.725833 | 1.63E-06 | hypermethylated |
| cg24109980 | 0.04393 | 0.290604324 | 2.725778 | 4.36E-06 | hypermethylated |
| cg14470895 | 0.04479 | 0.295963243 | 2.724169 | 1.23E-05 | hypermethylated |
| cg02478448 | 0.06898 | 0.455555676 | 2.723377 | 1.72E-06 | hypermethylated |
| cg17087479 | 0.0488  | 0.32215027  | 2.722781 | 4.94E-05 | hypermethylated |
| cg07821427 | 0.04852 | 0.320277297 | 2.72267  | 1.73E-05 | hypermethylated |
| cg23809442 | 0.0445  | 0.293351892 | 2.720755 | 4.73E-06 | hypermethylated |
| cg22661893 | 0.04517 | 0.297631351 | 2.72009  | 8.83E-06 | hypermethylated |
| cg24961583 | 0.0343  | 0.22593027  | 2.719597 | 4.24E-06 | hypermethylated |
| cg14055896 | 0.04699 | 0.309365946 | 2.718889 | 3.17E-06 | hypermethylated |
| cg21995919 | 0.04239 | 0.279031892 | 2.718634 | 2.32E-05 | hypermethylated |
| cg05694245 | 0.03735 | 0.245728649 | 2.717886 | 7.65E-05 | hypermethylated |
| cg21463349 | 0.03274 | 0.215395135 | 2.717859 | 2.46E-06 | hypermethylated |
| cg22753340 | 0.04694 | 0.308336216 | 2.715615 | 5.58E-06 | hypermethylated |
| cg21479226 | 0.05483 | 0.360043784 | 2.715135 | 6.93E-06 | hypermethylated |
| cg18888464 | 0.04114 | 0.270070811 | 2.714724 | 2.23E-06 | hypermethylated |
| cg08346159 | 0.04316 | 0.28330973  | 2.714613 | 5.65E-05 | hypermethylated |
| cg05984554 | 0.03304 | 0.216865405 | 2.714514 | 3.35E-06 | hypermethylated |
| cg26654934 | 0.04861 | 0.318780541 | 2.713239 | 4.93E-06 | hypermethylated |
| cg25886284 | 0.03946 | 0.258687027 | 2.712745 | 5.25E-05 | hypermethylated |
| cg04600170 | 0.03308 | 0.216791892 | 2.71228  | 3.35E-06 | hypermethylated |
| cg12781700 | 0.05601 | 0.367064324 | 2.712277 | 5.81E-06 | hypermethylated |
| cg13950603 | 0.0454  | 0.297402162 | 2.711651 | 6.75E-06 | hypermethylated |
| cg03145999 | 0.04113 | 0.269424865 | 2.71162  | 9.31E-06 | hypermethylated |
| cg21908235 | 0.05959 | 0.390347027 | 2.711615 | 3.69E-06 | hypermethylated |
| cg01350077 | 0.04672 | 0.305884324 | 2.710874 | 9.19E-06 | hypermethylated |
| cg27510182 | 0.04606 | 0.3015      | 2.710572 | 1.01E-05 | hypermethylated |
| cg14073722 | 0.05518 | 0.361172432 | 2.71047  | 5.35E-06 | hypermethylated |
| cg13962186 | 0.04086 | 0.267425405 | 2.710375 | 3.96E-06 | hypermethylated |
| cg10109500 | 0.03222 | 0.210659459 | 2.708884 | 2.56E-06 | hypermethylated |
| cg03306374 | 0.07634 | 0.499109189 | 2.708844 | 3.12E-06 | hypermethylated |
| cg19715410 | 0.04752 | 0.310623243 | 2.708559 | 0.000163 | hypermethylated |
| cg23248357 | 0.03411 | 0.222912973 | 2.708214 | 7.20E-07 | hypermethylated |
| cg12523924 | 0.04353 | 0.284373514 | 2.707705 | 1.01E-05 | hypermethylated |
| cg25267072 | 0.04107 | 0.268298919 | 2.707684 | 3.64E-06 | hypermethylated |
| cg23663774 | 0.04903 | 0.320204324 | 2.707256 | 5.43E-06 | hypermethylated |
| cg04612444 | 0.04844 | 0.3163      | 2.707023 | 1.99E-06 | hypermethylated |
| cg17373442 | 0.04587 | 0.299518378 | 2.707022 | 3.76E-05 | hypermethylated |
| cg05783915 | 0.05105 | 0.333256757 | 2.706651 | 1.09E-05 | hypermethylated |
| cg15607538 | 0.05191 | 0.338758378 | 2.706172 | 7.93E-06 | hypermethylated |
| cg18331515 | 0.04804 | 0.313483784 | 2.706083 | 5.58E-05 | hypermethylated |
| cg16405026 | 0.05213 | 0.340144865 | 2.705964 | 2.87E-06 | hypermethylated |
| cg00043819 | 0.0281  | 0.183222162 | 2.704952 | 2.64E-05 | hypermethylated |
| cg02264082 | 0.04158 | 0.271108649 | 2.704909 | 6.05E-06 | hypermethylated |

|            |         |             |          |          |                 |
|------------|---------|-------------|----------|----------|-----------------|
| cg04342955 | 0.05137 | 0.334927027 | 2.704849 | 1.21E-05 | hypermethylated |
| cg15042811 | 0.03958 | 0.258041081 | 2.704757 | 0.000103 | hypermethylated |
| cg19937061 | 0.05787 | 0.377090811 | 2.704024 | 3.69E-06 | hypermethylated |
| cg24198558 | 0.04192 | 0.273107568 | 2.703759 | 2.15E-05 | hypermethylated |
| cg00986824 | 0.04577 | 0.298165405 | 2.703639 | 2.56E-06 | hypermethylated |
| cg18780412 | 0.03553 | 0.23144973  | 2.703589 | 1.93E-06 | hypermethylated |
| cg24610236 | 0.04783 | 0.311448108 | 2.703004 | 1.62E-05 | hypermethylated |
| cg24236409 | 0.03278 | 0.213338919 | 2.702259 | 4.93E-06 | hypermethylated |
| cg25683325 | 0.0648  | 0.421683784 | 2.702096 | 1.62E-05 | hypermethylated |
| cg12353207 | 0.03395 | 0.220523784 | 2.699451 | 2.64E-05 | hypermethylated |
| cg22541735 | 0.06081 | 0.394831351 | 2.698856 | 2.42E-06 | hypermethylated |
| cg17741689 | 0.03975 | 0.258040541 | 2.698571 | 2.56E-06 | hypermethylated |
| cg19944763 | 0.04028 | 0.261438378 | 2.698335 | 9.31E-06 | hypermethylated |
| cg13879483 | 0.06227 | 0.404158378 | 2.698312 | 2.05E-06 | hypermethylated |
| cg04591032 | 0.04105 | 0.266160541 | 2.696843 | 6.57E-06 | hypermethylated |
| cg21635854 | 0.04341 | 0.281408108 | 2.696565 | 1.21E-05 | hypermethylated |
| cg20567847 | 0.04576 | 0.296579459 | 2.69626  | 3.44E-05 | hypermethylated |
| cg16707405 | 0.04305 | 0.278827568 | 2.695288 | 5.07E-06 | hypermethylated |
| cg01436128 | 0.03736 | 0.241935676 | 2.695057 | 3.49E-06 | hypermethylated |
| cg20148575 | 0.07295 | 0.471713514 | 2.692931 | 4.86E-06 | hypermethylated |
| cg10808783 | 0.03746 | 0.242177838 | 2.692644 | 1.25E-05 | hypermethylated |
| cg23302682 | 0.04543 | 0.293686486 | 2.69256  | 6.66E-06 | hypermethylated |
| cg00516513 | 0.04783 | 0.309076216 | 2.691975 | 1.28E-05 | hypermethylated |
| cg11437784 | 0.03999 | 0.258410811 | 2.691955 | 1.88E-06 | hypermethylated |
| cg22769941 | 0.04021 | 0.259782162 | 2.691676 | 8.95E-06 | hypermethylated |
| cg22916722 | 0.04536 | 0.292713514 | 2.689997 | 5.14E-06 | hypermethylated |
| cg25463470 | 0.03134 | 0.202225946 | 2.689891 | 2.16E-06 | hypermethylated |
| cg08149193 | 0.0556  | 0.358467568 | 2.688686 | 5.00E-06 | hypermethylated |
| cg14045872 | 0.05672 | 0.365636757 | 2.688482 | 4.86E-06 | hypermethylated |
| cg18529845 | 0.04966 | 0.320074054 | 2.68825  | 1.11E-05 | hypermethylated |
| cg27464184 | 0.04932 | 0.317815676 | 2.687946 | 2.42E-05 | hypermethylated |
| cg19694010 | 0.04368 | 0.281464865 | 2.68791  | 1.87E-05 | hypermethylated |
| cg16580499 | 0.04656 | 0.299814054 | 2.686905 | 3.85E-06 | hypermethylated |
| cg18777119 | 0.04604 | 0.296317838 | 2.686186 | 3.85E-06 | hypermethylated |
| cg00690148 | 0.0452  | 0.290732432 | 2.685297 | 1.75E-05 | hypermethylated |
| cg06083330 | 0.04879 | 0.313413514 | 2.68341  | 1.72E-06 | hypermethylated |
| cg24531255 | 0.04524 | 0.290604865 | 2.683388 | 4.42E-05 | hypermethylated |
| cg10741153 | 0.03581 | 0.229950811 | 2.682891 | 3.04E-06 | hypermethylated |
| cg20973720 | 0.0506  | 0.324543784 | 2.681204 | 5.31E-05 | hypermethylated |
| cg21884231 | 0.06487 | 0.415822162 | 2.680343 | 3.49E-06 | hypermethylated |
| cg03483150 | 0.04536 | 0.290400541 | 2.678552 | 4.60E-06 | hypermethylated |
| cg26615813 | 0.03972 | 0.254215135 | 2.678112 | 1.84E-05 | hypermethylated |
| cg27039662 | 0.03269 | 0.209212432 | 2.678047 | 3.74E-06 | hypermethylated |
| cg01447112 | 0.05865 | 0.375247027 | 2.677638 | 4.54E-06 | hypermethylated |
| cg13671919 | 0.02822 | 0.180424865 | 2.676608 | 3.59E-06 | hypermethylated |
| cg17422774 | 0.04238 | 0.270861081 | 2.676098 | 6.93E-06 | hypermethylated |
| cg06611922 | 0.03882 | 0.248095135 | 2.676021 | 3.69E-06 | hypermethylated |
| cg02809746 | 0.04671 | 0.298464865 | 2.675758 | 3.17E-06 | hypermethylated |
| cg01246835 | 0.03156 | 0.201612432 | 2.675415 | 3.44E-06 | hypermethylated |
| cg03044249 | 0.06555 | 0.418604865 | 2.674921 | 4.36E-06 | hypermethylated |
| cg26381364 | 0.05786 | 0.369411351 | 2.67459  | 1.84E-05 | hypermethylated |
| cg25019648 | 0.04027 | 0.256954054 | 2.673733 | 0.000102 | hypermethylated |
| cg24657817 | 0.05666 | 0.361482703 | 2.673524 | 1.31E-05 | hypermethylated |
| cg06572465 | 0.04977 | 0.317470811 | 2.673276 | 2.10E-06 | hypermethylated |
| cg02728595 | 0.04177 | 0.265928649 | 2.6705   | 0.000445 | hypermethylated |
| cg24202123 | 0.04909 | 0.31243027  | 2.670033 | 3.44E-05 | hypermethylated |
| cg00153110 | 0.03793 | 0.241327568 | 2.669581 | 9.44E-06 | hypermethylated |
| cg07519816 | 0.0458  | 0.291250811 | 2.668843 | 1.15E-05 | hypermethylated |

|            |         |             |          |          |                 |
|------------|---------|-------------|----------|----------|-----------------|
| cg11074814 | 0.05218 | 0.331626486 | 2.66799  | 5.89E-06 | hypermethylated |
| cg07072722 | 0.03181 | 0.202082162 | 2.66739  | 4.80E-06 | hypermethylated |
| cg14700304 | 0.04215 | 0.267699459 | 2.66701  | 7.12E-05 | hypermethylated |
| cg23528400 | 0.04773 | 0.302816757 | 2.665477 | 1.99E-05 | hypermethylated |
| cg23906738 | 0.07437 | 0.471822162 | 2.665451 | 1.99E-06 | hypermethylated |
| cg16519587 | 0.04893 | 0.310390811 | 2.665295 | 1.68E-05 | hypermethylated |
| cg03149560 | 0.04377 | 0.277548108 | 2.664724 | 4.36E-05 | hypermethylated |
| cg23934404 | 0.04982 | 0.315851351 | 2.664449 | 6.05E-06 | hypermethylated |
| cg25923609 | 0.07312 | 0.463496216 | 2.66422  | 6.78E-07 | hypermethylated |
| cg15015920 | 0.03254 | 0.206208649 | 2.663819 | 2.10E-06 | hypermethylated |
| cg12356890 | 0.05609 | 0.355191351 | 2.662781 | 1.99E-05 | hypermethylated |
| cg10437806 | 0.04013 | 0.253939459 | 2.661732 | 5.43E-06 | hypermethylated |
| cg16712637 | 0.02864 | 0.181224324 | 2.661673 | 8.60E-06 | hypermethylated |
| cg13495205 | 0.07351 | 0.465096757 | 2.661518 | 1.09E-06 | hypermethylated |
| cg25090499 | 0.03824 | 0.241719459 | 2.660179 | 5.81E-06 | hypermethylated |
| cg25191628 | 0.05621 | 0.355306486 | 2.660165 | 2.29E-06 | hypermethylated |
| cg14271531 | 0.03629 | 0.229347568 | 2.659892 | 4.48E-06 | hypermethylated |
| cg08911275 | 0.05575 | 0.352255135 | 2.659577 | 8.32E-05 | hypermethylated |
| cg13464448 | 0.03683 | 0.232708108 | 2.659568 | 3.85E-05 | hypermethylated |
| cg27553667 | 0.04484 | 0.283145946 | 2.658688 | 3.17E-06 | hypermethylated |
| cg13557668 | 0.04096 | 0.258597838 | 2.658423 | 2.15E-05 | hypermethylated |
| cg00926400 | 0.04418 | 0.278910811 | 2.658339 | 5.73E-06 | hypermethylated |
| cg09493505 | 0.0657  | 0.414587027 | 2.65771  | 8.83E-06 | hypermethylated |
| cg11414560 | 0.05216 | 0.329008108 | 2.657107 | 7.93E-06 | hypermethylated |
| cg08204280 | 0.04808 | 0.303263784 | 2.657064 | 7.22E-06 | hypermethylated |
| cg23766591 | 0.04331 | 0.273042703 | 2.656355 | 1.54E-05 | hypermethylated |
| cg23156916 | 0.04    | 0.25202973  | 2.655522 | 7.93E-06 | hypermethylated |
| cg26142412 | 0.05209 | 0.327931351 | 2.654315 | 1.20E-05 | hypermethylated |
| cg26565021 | 0.05521 | 0.347475135 | 2.653908 | 3.32E-05 | hypermethylated |
| cg00290506 | 0.03997 | 0.251428649 | 2.65316  | 1.09E-05 | hypermethylated |
| cg12012932 | 0.04357 | 0.274053514 | 2.653051 | 1.01E-05 | hypermethylated |
| cg11398452 | 0.05172 | 0.325234595 | 2.652687 | 9.05E-05 | hypermethylated |
| cg16007456 | 0.05226 | 0.328605946 | 2.65258  | 8.71E-06 | hypermethylated |
| cg26259537 | 0.0472  | 0.296772432 | 2.652498 | 4.26E-05 | hypermethylated |
| cg03502002 | 0.07546 | 0.474445946 | 2.65246  | 3.96E-06 | hypermethylated |
| cg15316843 | 0.06709 | 0.421524865 | 2.651448 | 2.57E-06 | hypermethylated |
| cg19725343 | 0.04908 | 0.308320541 | 2.651224 | 2.74E-05 | hypermethylated |
| cg20600210 | 0.03731 | 0.234247027 | 2.650396 | 3.39E-06 | hypermethylated |
| cg01464835 | 0.06438 | 0.40412     | 2.650099 | 5.65E-06 | hypermethylated |
| cg18375860 | 0.05877 | 0.368542162 | 2.648678 | 4.12E-06 | hypermethylated |
| cg03131298 | 0.02497 | 0.156558919 | 2.648438 | 1.05E-06 | hypermethylated |
| cg23858040 | 0.05261 | 0.329845946 | 2.648383 | 1.73E-05 | hypermethylated |
| cg04945331 | 0.05383 | 0.337434595 | 2.648126 | 3.69E-06 | hypermethylated |
| cg16426537 | 0.05174 | 0.324179459 | 2.647441 | 2.92E-05 | hypermethylated |
| cg16896847 | 0.04197 | 0.262748108 | 2.64625  | 1.17E-05 | hypermethylated |
| cg17302155 | 0.05524 | 0.345810811 | 2.646198 | 2.29E-06 | hypermethylated |
| cg02401454 | 0.05215 | 0.326456216 | 2.64615  | 2.79E-06 | hypermethylated |
| cg22702772 | 0.05678 | 0.355392973 | 2.64596  | 6.57E-06 | hypermethylated |
| cg25181651 | 0.06124 | 0.382631892 | 2.643411 | 5.81E-06 | hypermethylated |
| cg13314145 | 0.06201 | 0.387282703 | 2.642814 | 4.42E-06 | hypermethylated |
| cg14252519 | 0.05623 | 0.351147568 | 2.642665 | 6.08E-05 | hypermethylated |
| cg01240056 | 0.0621  | 0.38774     | 2.642424 | 1.08E-05 | hypermethylated |
| cg19126300 | 0.06086 | 0.379850811 | 2.641867 | 4.01E-06 | hypermethylated |
| cg16190732 | 0.06416 | 0.400445405 | 2.64186  | 1.31E-05 | hypermethylated |
| cg23495748 | 0.06117 | 0.381747027 | 2.641721 | 9.31E-06 | hypermethylated |
| cg07147166 | 0.04331 | 0.270091351 | 2.640675 | 4.12E-06 | hypermethylated |
| cg23989821 | 0.0604  | 0.376265946 | 2.639132 | 4.01E-06 | hypermethylated |
| cg22158650 | 0.06075 | 0.378404865 | 2.638974 | 2.79E-06 | hypermethylated |

|            |         |             |          |          |                 |
|------------|---------|-------------|----------|----------|-----------------|
| cg12060744 | 0.0612  | 0.381198919 | 2.63894  | 2.91E-06 | hypermethylated |
| cg18716164 | 0.06526 | 0.406316216 | 2.638332 | 5.21E-06 | hypermethylated |
| cg18092028 | 0.05661 | 0.352427568 | 2.638198 | 9.44E-06 | hypermethylated |
| cg02574509 | 0.04946 | 0.307660541 | 2.637005 | 6.93E-06 | hypermethylated |
| cg15427906 | 0.04117 | 0.256073514 | 2.636893 | 1.89E-05 | hypermethylated |
| cg09009536 | 0.04061 | 0.252474595 | 2.636231 | 7.42E-06 | hypermethylated |
| cg05040472 | 0.04057 | 0.252217838 | 2.636185 | 3.04E-06 | hypermethylated |
| cg21393713 | 0.05847 | 0.363310811 | 2.635436 | 2.42E-05 | hypermethylated |
| cg02002583 | 0.04568 | 0.283608649 | 2.634267 | 1.97E-05 | hypermethylated |
| cg10297491 | 0.05233 | 0.32470973  | 2.63344  | 3.62E-05 | hypermethylated |
| cg09527126 | 0.05345 | 0.331560541 | 2.63301  | 7.93E-06 | hypermethylated |
| cg22333960 | 0.0445  | 0.275910811 | 2.632325 | 4.00E-05 | hypermethylated |
| cg09979478 | 0.0447  | 0.277074054 | 2.631925 | 1.46E-05 | hypermethylated |
| cg11338643 | 0.04499 | 0.27883027  | 2.631711 | 1.73E-05 | hypermethylated |
| cg17203063 | 0.04132 | 0.256012973 | 2.631305 | 7.52E-06 | hypermethylated |
| cg03637815 | 0.04779 | 0.296048108 | 2.631051 | 5.73E-06 | hypermethylated |
| cg17712694 | 0.05247 | 0.324907568 | 2.630465 | 5.28E-06 | hypermethylated |
| cg20302133 | 0.0769  | 0.475952432 | 2.629762 | 7.72E-06 | hypermethylated |
| cg01815671 | 0.05546 | 0.342975676 | 2.628587 | 7.72E-06 | hypermethylated |
| cg13438893 | 0.06726 | 0.415751892 | 2.627902 | 1.88E-06 | hypermethylated |
| cg09371439 | 0.0201  | 0.124216757 | 2.627592 | 5.21E-06 | hypermethylated |
| cg15132565 | 0.06846 | 0.422497297 | 2.625609 | 2.64E-06 | hypermethylated |
| cg25185173 | 0.06073 | 0.374669189 | 2.625136 | 7.12E-06 | hypermethylated |
| cg04023150 | 0.04989 | 0.307678919 | 2.624603 | 4.05E-05 | hypermethylated |
| cg02318926 | 0.05562 | 0.343010811 | 2.624578 | 3.69E-06 | hypermethylated |
| cg04138185 | 0.05721 | 0.352811351 | 2.624558 | 1.18E-05 | hypermethylated |
| cg18402615 | 0.0334  | 0.205802703 | 2.623342 | 3.76E-05 | hypermethylated |
| cg16304215 | 0.04267 | 0.262921081 | 2.623336 | 7.83E-06 | hypermethylated |
| cg18617005 | 0.05884 | 0.362378919 | 2.62263  | 6.75E-06 | hypermethylated |
| cg21282549 | 0.05305 | 0.326515135 | 2.621725 | 1.33E-05 | hypermethylated |
| cg05513983 | 0.02657 | 0.163455135 | 2.621025 | 1.20E-05 | hypermethylated |
| cg09010671 | 0.05642 | 0.346914054 | 2.6203   | 1.44E-05 | hypermethylated |
| cg27555582 | 0.06044 | 0.371548108 | 2.619973 | 1.15E-06 | hypermethylated |
| cg16334314 | 0.04603 | 0.28293027  | 2.6198   | 2.04E-05 | hypermethylated |
| cg05821789 | 0.05607 | 0.344584865 | 2.619558 | 2.10E-06 | hypermethylated |
| cg10770742 | 0.052   | 0.319563243 | 2.619518 | 3.07E-05 | hypermethylated |
| cg05686497 | 0.05296 | 0.325351892 | 2.619026 | 2.02E-05 | hypermethylated |
| cg23632985 | 0.05622 | 0.345288649 | 2.618648 | 3.44E-06 | hypermethylated |
| cg23144681 | 0.04252 | 0.260985405 | 2.617756 | 5.86E-05 | hypermethylated |
| cg11342468 | 0.04769 | 0.292655676 | 2.617446 | 8.15E-06 | hypermethylated |
| cg25798792 | 0.0456  | 0.27973027  | 2.616931 | 3.00E-05 | hypermethylated |
| cg12940822 | 0.04581 | 0.280944324 | 2.61655  | 7.12E-06 | hypermethylated |
| cg22290744 | 0.0424  | 0.260000541 | 2.616378 | 1.17E-05 | hypermethylated |
| cg04673825 | 0.04278 | 0.262302703 | 2.616224 | 5.58E-06 | hypermethylated |
| cg04136610 | 0.0578  | 0.354318378 | 2.615905 | 8.95E-06 | hypermethylated |
| cg03976877 | 0.04839 | 0.296515676 | 2.615328 | 3.04E-05 | hypermethylated |
| cg10303487 | 0.05495 | 0.336670811 | 2.615147 | 8.83E-06 | hypermethylated |
| cg02761480 | 0.05146 | 0.315229189 | 2.614878 | 3.26E-06 | hypermethylated |
| cg10636403 | 0.05355 | 0.32792     | 2.614385 | 0.000132 | hypermethylated |
| cg24150172 | 0.0585  | 0.358209189 | 2.614294 | 1.35E-05 | hypermethylated |
| cg11835068 | 0.03878 | 0.237435135 | 2.614149 | 9.94E-07 | hypermethylated |
| cg19226007 | 0.03373 | 0.20646973  | 2.613826 | 1.14E-05 | hypermethylated |
| cg00836482 | 0.06076 | 0.371795135 | 2.613314 | 2.71E-05 | hypermethylated |
| cg07780095 | 0.05144 | 0.314764324 | 2.613309 | 4.58E-05 | hypermethylated |
| cg18764577 | 0.04167 | 0.254951892 | 2.613144 | 4.48E-06 | hypermethylated |
| cg23300659 | 0.0357  | 0.218415135 | 2.613077 | 8.15E-06 | hypermethylated |
| cg17509967 | 0.05673 | 0.346888108 | 2.612287 | 4.42E-06 | hypermethylated |
| cg27237300 | 0.05272 | 0.322335135 | 2.612139 | 8.83E-06 | hypermethylated |

|            |         |             |          |          |                 |
|------------|---------|-------------|----------|----------|-----------------|
| cg09765089 | 0.06479 | 0.395336216 | 2.609237 | 1.50E-05 | hypermethylated |
| cg18098400 | 0.04975 | 0.303538919 | 2.609113 | 1.31E-05 | hypermethylated |
| cg16234557 | 0.0488  | 0.297381081 | 2.60736  | 1.14E-05 | hypermethylated |
| cg27116912 | 0.0435  | 0.265055135 | 2.607205 | 3.49E-06 | hypermethylated |
| cg22434409 | 0.07333 | 0.446790811 | 2.607124 | 2.57E-06 | hypermethylated |
| cg22762492 | 0.04105 | 0.250027568 | 2.606633 | 2.99E-06 | hypermethylated |
| cg26387689 | 0.03724 | 0.22681027  | 2.606561 | 5.86E-05 | hypermethylated |
| cg17305436 | 0.04143 | 0.252080541 | 2.605137 | 2.79E-06 | hypermethylated |
| cg16966815 | 0.0304  | 0.184874054 | 2.6044   | 1.60E-05 | hypermethylated |
| cg09548051 | 0.0445  | 0.270580541 | 2.604181 | 1.62E-05 | hypermethylated |
| cg05884032 | 0.03765 | 0.228661081 | 2.602489 | 3.30E-06 | hypermethylated |
| cg25051341 | 0.05269 | 0.320001622 | 2.602478 | 1.66E-05 | hypermethylated |
| cg01791874 | 0.03665 | 0.222585946 | 2.602477 | 7.52E-06 | hypermethylated |
| cg19068510 | 0.04318 | 0.262198919 | 2.602227 | 6.31E-05 | hypermethylated |
| cg20453394 | 0.04036 | 0.245024865 | 2.60193  | 9.31E-06 | hypermethylated |
| cg03175305 | 0.03241 | 0.196714054 | 2.601589 | 4.36E-06 | hypermethylated |
| cg19054524 | 0.04387 | 0.266166486 | 2.601022 | 1.30E-05 | hypermethylated |
| cg13021333 | 0.05663 | 0.343503243 | 2.600685 | 1.58E-06 | hypermethylated |
| cg00240432 | 0.04782 | 0.290014054 | 2.600437 | 4.42E-06 | hypermethylated |
| cg09644707 | 0.04823 | 0.292456216 | 2.600218 | 6.05E-06 | hypermethylated |
| cg24725789 | 0.04183 | 0.253564865 | 2.599745 | 5.00E-06 | hypermethylated |
| cg11014373 | 0.05055 | 0.306421081 | 2.599733 | 4.07E-06 | hypermethylated |
| cg06482019 | 0.04467 | 0.270749189 | 2.599579 | 3.04E-06 | hypermethylated |
| cg04401986 | 0.04062 | 0.24564973  | 2.596341 | 4.01E-06 | hypermethylated |
| cg14369938 | 0.04667 | 0.282215676 | 2.596231 | 9.96E-06 | hypermethylated |
| cg20392607 | 0.0461  | 0.278612432 | 2.595421 | 1.71E-05 | hypermethylated |
| cg12812583 | 0.04095 | 0.247351351 | 2.594626 | 3.00E-05 | hypermethylated |
| cg01519253 | 0.04433 | 0.267696757 | 2.594244 | 6.75E-06 | hypermethylated |
| cg12869912 | 0.04377 | 0.264239459 | 2.593832 | 1.92E-05 | hypermethylated |
| cg05659097 | 0.05386 | 0.325125946 | 2.593713 | 1.72E-06 | hypermethylated |
| cg13486532 | 0.03873 | 0.233754595 | 2.593471 | 5.93E-05 | hypermethylated |
| cg08074851 | 0.05351 | 0.322940541 | 2.593388 | 7.12E-06 | hypermethylated |
| cg01454487 | 0.0413  | 0.249116757 | 2.592608 | 1.06E-05 | hypermethylated |
| cg03804213 | 0.05365 | 0.32357027  | 2.592429 | 1.02E-05 | hypermethylated |
| cg02340083 | 0.043   | 0.259313514 | 2.592289 | 3.49E-06 | hypermethylated |
| cg26705960 | 0.04406 | 0.26561027  | 2.59177  | 2.85E-05 | hypermethylated |
| cg23619365 | 0.07844 | 0.472813514 | 2.59161  | 2.10E-06 | hypermethylated |
| cg03109827 | 0.06361 | 0.383378919 | 2.591446 | 5.28E-06 | hypermethylated |
| cg18693395 | 0.0522  | 0.314593514 | 2.591367 | 1.29E-06 | hypermethylated |
| cg05495949 | 0.05399 | 0.325313514 | 2.591067 | 2.15E-05 | hypermethylated |
| cg20398486 | 0.05423 | 0.326734054 | 2.590954 | 2.49E-06 | hypermethylated |
| cg11630154 | 0.03605 | 0.217167568 | 2.590737 | 2.46E-06 | hypermethylated |
| cg27252696 | 0.06116 | 0.368422703 | 2.590702 | 2.92E-05 | hypermethylated |
| cg17131044 | 0.03117 | 0.187751351 | 2.590593 | 2.91E-06 | hypermethylated |
| cg16703956 | 0.06238 | 0.375677838 | 2.590341 | 5.73E-06 | hypermethylated |
| cg00304520 | 0.03286 | 0.197867027 | 2.590127 | 1.26E-06 | hypermethylated |
| cg10356613 | 0.0571  | 0.343824324 | 2.590109 | 5.19E-05 | hypermethylated |
| cg24934063 | 0.03261 | 0.196277838 | 2.589511 | 1.58E-05 | hypermethylated |
| cg03425110 | 0.04176 | 0.251280541 | 2.589105 | 4.70E-05 | hypermethylated |
| cg05309948 | 0.0484  | 0.29109027  | 2.588388 | 1.97E-05 | hypermethylated |
| cg07678904 | 0.03851 | 0.231513514 | 2.587791 | 0.004863 | hypermethylated |
| cg13096208 | 0.04302 | 0.258542162 | 2.58732  | 2.32E-05 | hypermethylated |
| cg10435849 | 0.05409 | 0.325069189 | 2.587313 | 1.87E-05 | hypermethylated |
| cg04701034 | 0.05364 | 0.322345405 | 2.587226 | 0.000551 | hypermethylated |
| cg03646189 | 0.05103 | 0.306544324 | 2.586678 | 3.45E-07 | hypermethylated |
| cg26328510 | 0.0504  | 0.302574054 | 2.585793 | 8.94E-05 | hypermethylated |
| cg18944047 | 0.04285 | 0.257212973 | 2.585596 | 5.00E-06 | hypermethylated |
| cg10512875 | 0.04839 | 0.290359459 | 2.585059 | 2.27E-05 | hypermethylated |

|            |         |             |          |          |                 |
|------------|---------|-------------|----------|----------|-----------------|
| cg08464190 | 0.04696 | 0.281635135 | 2.584323 | 6.01E-05 | hypermethylated |
| cg04688351 | 0.05835 | 0.349716757 | 2.583382 | 4.88E-07 | hypermethylated |
| cg03092191 | 0.04268 | 0.255666486 | 2.582631 | 8.60E-06 | hypermethylated |
| cg26309134 | 0.05568 | 0.33350973  | 2.582498 | 7.83E-06 | hypermethylated |
| cg13211683 | 0.05332 | 0.319291351 | 2.582125 | 1.42E-05 | hypermethylated |
| cg12746059 | 0.0412  | 0.246655676 | 2.581782 | 2.85E-05 | hypermethylated |
| cg11071231 | 0.05754 | 0.344463243 | 2.581713 | 4.01E-06 | hypermethylated |
| cg16642284 | 0.07847 | 0.469313514 | 2.580339 | 1.94E-05 | hypermethylated |
| cg14696396 | 0.06408 | 0.383217838 | 2.580219 | 1.39E-05 | hypermethylated |
| cg17284804 | 0.05063 | 0.302777838 | 2.580195 | 9.57E-06 | hypermethylated |
| cg24472231 | 0.05589 | 0.334092973 | 2.579588 | 1.52E-05 | hypermethylated |
| cg08526074 | 0.05505 | 0.328948108 | 2.579046 | 1.05E-05 | hypermethylated |
| cg19098763 | 0.06259 | 0.373776757 | 2.578173 | 4.73E-06 | hypermethylated |
| cg09671258 | 0.07242 | 0.432435135 | 2.578024 | 6.22E-06 | hypermethylated |
| cg24872782 | 0.04701 | 0.280625946 | 2.577609 | 1.71E-05 | hypermethylated |
| cg23244790 | 0.05345 | 0.318914054 | 2.576906 | 1.49E-06 | hypermethylated |
| cg03264601 | 0.05279 | 0.314956757 | 2.576817 | 5.58E-06 | hypermethylated |
| cg13755795 | 0.06309 | 0.376162703 | 2.575874 | 7.93E-06 | hypermethylated |
| cg17168456 | 0.05104 | 0.304316757 | 2.575874 | 1.01E-05 | hypermethylated |
| cg10273340 | 0.0481  | 0.286776216 | 2.575817 | 2.74E-05 | hypermethylated |
| cg20673829 | 0.05415 | 0.322827568 | 2.575731 | 6.93E-06 | hypermethylated |
| cg17300353 | 0.0506  | 0.301624324 | 2.575543 | 5.89E-06 | hypermethylated |
| cg08015447 | 0.0419  | 0.249697297 | 2.575158 | 7.62E-06 | hypermethylated |
| cg25397945 | 0.07869 | 0.468639459 | 2.574226 | 2.79E-06 | hypermethylated |
| cg06554200 | 0.03405 | 0.202784324 | 2.574219 | 1.63E-06 | hypermethylated |
| cg08430009 | 0.06015 | 0.358167568 | 2.573998 | 1.46E-05 | hypermethylated |
| cg26195583 | 0.03729 | 0.221825946 | 2.572567 | 1.89E-05 | hypermethylated |
| cg26091021 | 0.06417 | 0.381617838 | 2.572158 | 3.79E-06 | hypermethylated |
| cg06546806 | 0.05465 | 0.324771351 | 2.571131 | 1.52E-05 | hypermethylated |
| cg06682197 | 0.03416 | 0.202707568 | 2.56902  | 1.06E-05 | hypermethylated |
| cg14015706 | 0.04119 | 0.244343243 | 2.568543 | 2.38E-05 | hypermethylated |
| cg13407456 | 0.05415 | 0.321140541 | 2.568172 | 9.07E-06 | hypermethylated |
| cg00046625 | 0.04481 | 0.265732973 | 2.568085 | 1.82E-05 | hypermethylated |
| cg24393316 | 0.04041 | 0.239602162 | 2.567857 | 3.64E-06 | hypermethylated |
| cg21844856 | 0.03618 | 0.214444324 | 2.567339 | 3.57E-05 | hypermethylated |
| cg07033372 | 0.05608 | 0.332210811 | 2.566541 | 6.39E-06 | hypermethylated |
| cg27360326 | 0.07056 | 0.417692973 | 2.56552  | 3.12E-06 | hypermethylated |
| cg20443254 | 0.0737  | 0.436170811 | 2.565157 | 2.36E-06 | hypermethylated |
| cg18627235 | 0.0559  | 0.330677297 | 2.564504 | 1.71E-05 | hypermethylated |
| cg19717586 | 0.08932 | 0.527794595 | 2.562921 | 3.04E-06 | hypermethylated |
| cg01461410 | 0.04034 | 0.238345405 | 2.562771 | 3.49E-05 | hypermethylated |
| cg03224572 | 0.06273 | 0.370627027 | 2.562741 | 4.01E-06 | hypermethylated |
| cg19852958 | 0.07053 | 0.41661027  | 2.562389 | 5.14E-06 | hypermethylated |
| cg16640855 | 0.05782 | 0.341348108 | 2.561603 | 4.54E-06 | hypermethylated |
| cg12483476 | 0.05795 | 0.3421      | 2.561538 | 3.39E-06 | hypermethylated |
| cg27264049 | 0.04096 | 0.241576757 | 2.560194 | 7.32E-06 | hypermethylated |
| cg22660147 | 0.03779 | 0.22284973  | 2.559995 | 2.21E-05 | hypermethylated |
| cg11857997 | 0.04449 | 0.262297838 | 2.559653 | 8.83E-06 | hypermethylated |
| cg12314713 | 0.05798 | 0.341642162 | 2.558859 | 2.64E-05 | hypermethylated |
| cg20948997 | 0.0357  | 0.210206486 | 2.557811 | 1.42E-05 | hypermethylated |
| cg15861196 | 0.03861 | 0.227170811 | 2.556731 | 3.49E-06 | hypermethylated |
| cg17538572 | 0.06185 | 0.363691892 | 2.555871 | 2.64E-05 | hypermethylated |
| cg16635314 | 0.04506 | 0.264863243 | 2.555328 | 6.57E-06 | hypermethylated |
| cg00017437 | 0.0534  | 0.313743243 | 2.554673 | 3.59E-06 | hypermethylated |
| cg16630482 | 0.06596 | 0.387518919 | 2.554603 | 4.48E-06 | hypermethylated |
| cg20539752 | 0.04856 | 0.285144324 | 2.553852 | 5.89E-06 | hypermethylated |
| cg01070209 | 0.04682 | 0.274831892 | 2.553353 | 1.71E-05 | hypermethylated |
| cg14256587 | 0.04588 | 0.269300541 | 2.55328  | 7.42E-06 | hypermethylated |



|            |         |             |          |          |                 |
|------------|---------|-------------|----------|----------|-----------------|
| cg15032142 | 0.04822 | 0.283023784 | 2.55322  | 9.44E-06 | hypermethylated |
| cg18229521 | 0.06953 | 0.407678378 | 2.551724 | 4.42E-06 | hypermethylated |
| cg18070676 | 0.05045 | 0.295566486 | 2.550557 | 1.68E-05 | hypermethylated |
| cg20249252 | 0.05425 | 0.317670811 | 2.549837 | 4.30E-06 | hypermethylated |
| cg21667878 | 0.05202 | 0.304580541 | 2.549685 | 0.000148 | hypermethylated |
| cg15822765 | 0.07458 | 0.436472432 | 2.54903  | 3.15E-05 | hypermethylated |
| cg16479539 | 0.03596 | 0.21044     | 2.548944 | 3.85E-05 | hypermethylated |
| cg19861117 | 0.03796 | 0.222137838 | 2.548903 | 1.12E-05 | hypermethylated |
| cg25189564 | 0.07628 | 0.44635027  | 2.5488   | 6.13E-06 | hypermethylated |
| cg18787401 | 0.05225 | 0.305587568 | 2.548083 | 3.00E-05 | hypermethylated |
| cg24369185 | 0.0562  | 0.328542162 | 2.547436 | 2.95E-06 | hypermethylated |
| cg14872657 | 0.04783 | 0.279586486 | 2.547307 | 6.22E-06 | hypermethylated |
| cg19864758 | 0.05638 | 0.32942     | 2.546673 | 1.68E-05 | hypermethylated |
| cg22531183 | 0.05373 | 0.313904865 | 2.546528 | 0.000681 | hypermethylated |
| cg14657517 | 0.05109 | 0.298427568 | 2.546268 | 1.08E-05 | hypermethylated |
| cg24812837 | 0.05156 | 0.301165405 | 2.546232 | 3.00E-05 | hypermethylated |
| cg26198463 | 0.02873 | 0.167752973 | 2.545708 | 4.93E-06 | hypermethylated |
| cg16405019 | 0.04083 | 0.238359459 | 2.545437 | 2.16E-06 | hypermethylated |
| cg07374509 | 0.04634 | 0.270408649 | 2.544811 | 3.07E-05 | hypermethylated |
| cg03506640 | 0.04792 | 0.279564865 | 2.544483 | 2.21E-05 | hypermethylated |
| cg08964780 | 0.04658 | 0.271707568 | 2.544272 | 0.000232 | hypermethylated |
| cg06543087 | 0.0392  | 0.228634595 | 2.544118 | 9.19E-06 | hypermethylated |
| cg20174066 | 0.04649 | 0.271047568 | 2.543554 | 1.18E-05 | hypermethylated |
| cg06310816 | 0.06951 | 0.405135676 | 2.543113 | 1.94E-05 | hypermethylated |
| cg04077662 | 0.04259 | 0.248174054 | 2.542766 | 1.44E-05 | hypermethylated |
| cg08492619 | 0.05237 | 0.305118919 | 2.542559 | 5.06E-05 | hypermethylated |
| cg02978421 | 0.04385 | 0.255474054 | 2.542528 | 0.000159 | hypermethylated |
| cg02860732 | 0.05281 | 0.307653514 | 2.542423 | 3.90E-06 | hypermethylated |
| cg27533288 | 0.05648 | 0.328917838 | 2.541915 | 0.0002   | hypermethylated |
| cg08079580 | 0.033   | 0.192119459 | 2.541466 | 4.24E-06 | hypermethylated |
| cg01777643 | 0.061   | 0.354972973 | 2.540828 | 6.75E-06 | hypermethylated |
| cg04198308 | 0.0395  | 0.229793514 | 2.540414 | 7.74E-05 | hypermethylated |
| cg24427504 | 0.02918 | 0.169688649 | 2.539838 | 3.85E-06 | hypermethylated |
| cg23065934 | 0.04181 | 0.243129189 | 2.539803 | 7.52E-06 | hypermethylated |
| cg15415452 | 0.06852 | 0.398091351 | 2.538502 | 2.91E-06 | hypermethylated |
| cg04159903 | 0.03423 | 0.198835135 | 2.53824  | 8.37E-06 | hypermethylated |
| cg26990102 | 0.04602 | 0.267096757 | 2.53703  | 2.95E-06 | hypermethylated |
| cg24903887 | 0.05166 | 0.299823243 | 2.536993 | 1.21E-05 | hypermethylated |
| cg02305377 | 0.05476 | 0.317783784 | 2.536851 | 3.12E-06 | hypermethylated |
| cg27504802 | 0.04891 | 0.283731351 | 2.536324 | 4.05E-05 | hypermethylated |
| cg05134015 | 0.04216 | 0.244416757 | 2.535396 | 4.36E-06 | hypermethylated |
| cg02026062 | 0.03855 | 0.223477297 | 2.535326 | 1.52E-05 | hypermethylated |
| cg20312205 | 0.06806 | 0.394148108 | 2.533859 | 6.93E-06 | hypermethylated |
| cg00853103 | 0.04037 | 0.233697297 | 2.533286 | 3.96E-06 | hypermethylated |
| cg12860686 | 0.05311 | 0.307418378 | 2.533148 | 2.71E-06 | hypermethylated |
| cg24595510 | 0.06425 | 0.371844865 | 2.532932 | 1.08E-05 | hypermethylated |
| cg21114773 | 0.05195 | 0.300604865 | 2.532673 | 1.62E-05 | hypermethylated |
| cg25950235 | 0.05662 | 0.327527027 | 2.53223  | 3.64E-06 | hypermethylated |
| cg18759960 | 0.04617 | 0.266867568 | 2.531096 | 3.44E-05 | hypermethylated |
| cg27515369 | 0.06513 | 0.376348649 | 2.530676 | 1.04E-05 | hypermethylated |
| cg25756435 | 0.04066 | 0.234879459 | 2.530238 | 1.05E-05 | hypermethylated |
| cg27618240 | 0.07161 | 0.413588108 | 2.529962 | 8.60E-06 | hypermethylated |
| cg05255522 | 0.04735 | 0.273413514 | 2.529648 | 2.10E-06 | hypermethylated |
| cg11373604 | 0.02756 | 0.159111351 | 2.529389 | 1.12E-05 | hypermethylated |
| cg09193347 | 0.04367 | 0.251974054 | 2.528561 | 2.51E-05 | hypermethylated |
| cg02253760 | 0.07258 | 0.418778378 | 2.528543 | 4.73E-06 | hypermethylated |
| cg23954465 | 0.04626 | 0.266715135 | 2.527463 | 8.83E-06 | hypermethylated |
| cg08712932 | 0.04587 | 0.264434054 | 2.527285 | 1.62E-05 | hypermethylated |

|            |         |             |          |          |                 |
|------------|---------|-------------|----------|----------|-----------------|
| cg13796823 | 0.05904 | 0.340300541 | 2.527045 | 9.31E-06 | hypermethylated |
| cg22491927 | 0.07144 | 0.411751892 | 2.526971 | 7.32E-06 | hypermethylated |
| cg05494604 | 0.0601  | 0.346323784 | 2.526685 | 4.30E-06 | hypermethylated |
| cg20293594 | 0.05081 | 0.292751351 | 2.526491 | 2.36E-06 | hypermethylated |
| cg19861741 | 0.04671 | 0.269002703 | 2.525817 | 3.85E-06 | hypermethylated |
| cg05783139 | 0.04541 | 0.261274595 | 2.524485 | 5.06E-05 | hypermethylated |
| cg14209299 | 0.04043 | 0.232313514 | 2.522575 | 5.28E-06 | hypermethylated |
| cg17911318 | 0.05309 | 0.305044865 | 2.522509 | 1.80E-05 | hypermethylated |
| cg18326021 | 0.05554 | 0.319045946 | 2.522165 | 3.54E-06 | hypermethylated |
| cg06304097 | 0.08814 | 0.505990811 | 2.521242 | 6.39E-06 | hypermethylated |
| cg09426834 | 0.06319 | 0.362618919 | 2.520686 | 1.46E-05 | hypermethylated |
| cg21385821 | 0.0532  | 0.305284865 | 2.520658 | 6.02E-07 | hypermethylated |
| cg24675150 | 0.054   | 0.309786486 | 2.520243 | 3.44E-05 | hypermethylated |
| cg01532168 | 0.05723 | 0.327910811 | 2.51846  | 8.13E-05 | hypermethylated |
| cg08279075 | 0.04368 | 0.249801622 | 2.515738 | 6.54E-05 | hypermethylated |
| cg12904880 | 0.08514 | 0.486887027 | 2.515678 | 6.99E-07 | hypermethylated |
| cg12143789 | 0.05224 | 0.298735135 | 2.51564  | 1.25E-05 | hypermethylated |
| cg04842426 | 0.05135 | 0.293540541 | 2.515124 | 6.39E-06 | hypermethylated |
| cg10386483 | 0.0566  | 0.323531892 | 2.515034 | 2.02E-05 | hypermethylated |
| cg26673012 | 0.06031 | 0.344737297 | 2.515028 | 5.43E-06 | hypermethylated |
| cg24511738 | 0.0436  | 0.249089189 | 2.514262 | 7.12E-06 | hypermethylated |
| cg09642925 | 0.04028 | 0.230115676 | 2.514224 | 1.33E-06 | hypermethylated |
| cg13078140 | 0.05476 | 0.312604865 | 2.513146 | 5.58E-06 | hypermethylated |
| cg06159486 | 0.04775 | 0.272584865 | 2.513133 | 1.12E-05 | hypermethylated |
| cg18639233 | 0.04795 | 0.273715135 | 2.513072 | 6.22E-06 | hypermethylated |
| cg26612735 | 0.03801 | 0.216958919 | 2.512971 | 1.39E-05 | hypermethylated |
| cg07167946 | 0.03908 | 0.222907568 | 2.511943 | 2.36E-06 | hypermethylated |
| cg24425021 | 0.04531 | 0.258355676 | 2.511457 | 1.26E-05 | hypermethylated |
| cg06750832 | 0.05466 | 0.311645405 | 2.511348 | 7.52E-06 | hypermethylated |
| cg23076299 | 0.04254 | 0.242534054 | 2.511295 | 0.000143 | hypermethylated |
| cg12513880 | 0.05042 | 0.287381622 | 2.5109   | 1.42E-05 | hypermethylated |
| cg21629500 | 0.07331 | 0.417806486 | 2.510753 | 1.37E-06 | hypermethylated |
| cg13239420 | 0.05806 | 0.330784865 | 2.510277 | 2.45E-05 | hypermethylated |
| cg19712603 | 0.06818 | 0.38791027  | 2.508302 | 6.57E-06 | hypermethylated |
| cg05994094 | 0.04116 | 0.234147027 | 2.5081   | 1.92E-05 | hypermethylated |
| cg17787134 | 0.05771 | 0.328254595 | 2.507922 | 1.94E-05 | hypermethylated |
| cg16357388 | 0.05204 | 0.295989189 | 2.507852 | 5.97E-06 | hypermethylated |
| cg25092838 | 0.06963 | 0.39603027  | 2.50783  | 2.68E-06 | hypermethylated |
| cg12882697 | 0.03874 | 0.220244865 | 2.507213 | 1.02E-05 | hypermethylated |
| cg19384531 | 0.03852 | 0.21883027  | 2.506133 | 1.37E-06 | hypermethylated |
| cg00295794 | 0.07187 | 0.408108108 | 2.50549  | 2.05E-06 | hypermethylated |
| cg04184232 | 0.05352 | 0.303870811 | 2.505308 | 2.91E-06 | hypermethylated |
| cg06183338 | 0.08216 | 0.466435135 | 2.505168 | 1.72E-06 | hypermethylated |
| cg05375728 | 0.05178 | 0.293947027 | 2.505089 | 2.45E-05 | hypermethylated |
| cg02886408 | 0.05126 | 0.290823784 | 2.50424  | 3.17E-06 | hypermethylated |
| cg08065231 | 0.07257 | 0.411646486 | 2.503961 | 4.60E-06 | hypermethylated |
| cg07915921 | 0.09079 | 0.514837838 | 2.503513 | 2.91E-06 | hypermethylated |
| cg15790820 | 0.06143 | 0.348199459 | 2.502899 | 1.84E-05 | hypermethylated |
| cg12768681 | 0.06602 | 0.374037838 | 2.502209 | 1.06E-05 | hypermethylated |
| cg24896649 | 0.05241 | 0.296695676 | 2.50107  | 4.60E-06 | hypermethylated |
| cg09053680 | 0.07326 | 0.414676216 | 2.500888 | 2.15E-05 | hypermethylated |
| cg21026830 | 0.0589  | 0.33335027  | 2.500699 | 5.51E-07 | hypermethylated |
| cg27298506 | 0.04573 | 0.258805405 | 2.500655 | 5.35E-06 | hypermethylated |
| cg11389172 | 0.0585  | 0.331039459 | 2.500495 | 1.68E-05 | hypermethylated |
| cg26715952 | 0.05229 | 0.295811892 | 2.500073 | 3.40E-05 | hypermethylated |
| cg13823136 | 0.05451 | 0.308306486 | 2.499772 | 1.28E-05 | hypermethylated |
| cg22989103 | 0.03988 | 0.225441081 | 2.499013 | 3.23E-05 | hypermethylated |
| cg20764887 | 0.06556 | 0.370592973 | 2.498948 | 2.49E-06 | hypermethylated |

|            |         |             |          |          |                 |
|------------|---------|-------------|----------|----------|-----------------|
| cg07013734 | 0.04369 | 0.246950811 | 2.498849 | 3.26E-06 | hypermethylated |
| cg03943218 | 0.07477 | 0.422405405 | 2.498097 | 2.57E-06 | hypermethylated |
| cg06424097 | 0.03139 | 0.177324865 | 2.498018 | 5.86E-05 | hypermethylated |
| cg02230017 | 0.05416 | 0.305944865 | 2.497972 | 1.82E-05 | hypermethylated |
| cg14353137 | 0.05181 | 0.292637838 | 2.497814 | 1.44E-05 | hypermethylated |
| cg01307130 | 0.06431 | 0.362943243 | 2.496629 | 6.66E-06 | hypermethylated |
| cg24946597 | 0.05332 | 0.300843784 | 2.496266 | 2.04E-05 | hypermethylated |
| cg02874376 | 0.05849 | 0.329768649 | 2.495192 | 5.73E-06 | hypermethylated |
| cg03994318 | 0.06071 | 0.342221081 | 2.494923 | 3.04E-05 | hypermethylated |
| cg08301572 | 0.05031 | 0.283488649 | 2.494374 | 1.70E-06 | hypermethylated |
| cg10237419 | 0.03905 | 0.219994595 | 2.494074 | 6.95E-05 | hypermethylated |
| cg00179217 | 0.05326 | 0.300033514 | 2.493999 | 6.22E-06 | hypermethylated |
| cg03146949 | 0.06626 | 0.372993514 | 2.49294  | 2.15E-05 | hypermethylated |
| cg09515947 | 0.03771 | 0.212263243 | 2.492836 | 7.72E-06 | hypermethylated |
| cg14932016 | 0.05856 | 0.329518378 | 2.492371 | 2.45E-05 | hypermethylated |
| cg00097146 | 0.06745 | 0.379474595 | 2.492113 | 8.34E-07 | hypermethylated |
| cg02842227 | 0.04203 | 0.236396757 | 2.491719 | 7.42E-06 | hypermethylated |
| cg18249173 | 0.06715 | 0.377671351 | 2.491672 | 1.54E-05 | hypermethylated |
| cg11452391 | 0.0423  | 0.237897297 | 2.491609 | 3.64E-06 | hypermethylated |
| cg05452406 | 0.06067 | 0.341167027 | 2.491423 | 2.23E-06 | hypermethylated |
| cg02671880 | 0.04313 | 0.242494595 | 2.491189 | 3.59E-06 | hypermethylated |
| cg02866628 | 0.04582 | 0.257598919 | 2.491077 | 1.31E-05 | hypermethylated |
| cg18035399 | 0.05315 | 0.298783784 | 2.49096  | 4.76E-05 | hypermethylated |
| cg06873316 | 0.04888 | 0.274753514 | 2.490822 | 1.26E-05 | hypermethylated |
| cg10224098 | 0.07187 | 0.403865946 | 2.490415 | 5.73E-06 | hypermethylated |
| cg08347047 | 0.05239 | 0.294298919 | 2.489919 | 3.96E-06 | hypermethylated |
| cg20100910 | 0.05073 | 0.284956216 | 2.489829 | 7.47E-05 | hypermethylated |
| cg25970832 | 0.03474 | 0.195090811 | 2.489476 | 4.36E-05 | hypermethylated |
| cg13909534 | 0.0402  | 0.225702703 | 2.489156 | 3.90E-05 | hypermethylated |
| cg12456799 | 0.04866 | 0.273166486 | 2.488972 | 8.15E-06 | hypermethylated |
| cg14189141 | 0.06831 | 0.383207027 | 2.487955 | 1.09E-06 | hypermethylated |
| cg01590753 | 0.04232 | 0.237215135 | 2.486785 | 3.23E-05 | hypermethylated |
| cg08501426 | 0.04288 | 0.240346486 | 2.486739 | 1.52E-05 | hypermethylated |
| cg02943578 | 0.0512  | 0.286775135 | 2.485704 | 7.12E-06 | hypermethylated |
| cg22455914 | 0.06625 | 0.370920541 | 2.485118 | 5.45E-05 | hypermethylated |
| cg19595835 | 0.03141 | 0.175814595 | 2.484759 | 9.57E-06 | hypermethylated |
| cg24637364 | 0.06571 | 0.36764973  | 2.484147 | 1.01E-05 | hypermethylated |
| cg10662314 | 0.05596 | 0.312942162 | 2.483428 | 8.42E-05 | hypermethylated |
| cg01972751 | 0.06874 | 0.384395135 | 2.483368 | 2.71E-06 | hypermethylated |
| cg12453014 | 0.06343 | 0.354583243 | 2.482887 | 5.58E-06 | hypermethylated |
| cg24847685 | 0.06574 | 0.367417838 | 2.482578 | 4.60E-06 | hypermethylated |
| cg03659519 | 0.05108 | 0.285367027 | 2.481988 | 1.84E-05 | hypermethylated |
| cg01405040 | 0.07106 | 0.396876757 | 2.481581 | 1.33E-06 | hypermethylated |
| cg19019537 | 0.06226 | 0.347572432 | 2.480936 | 9.96E-06 | hypermethylated |
| cg18897632 | 0.08249 | 0.460482162 | 2.480854 | 4.73E-06 | hypermethylated |
| cg20172627 | 0.05839 | 0.325664865 | 2.479595 | 7.75E-05 | hypermethylated |
| cg14627348 | 0.04889 | 0.272468108 | 2.478476 | 2.81E-05 | hypermethylated |
| cg14031402 | 0.03833 | 0.213578378 | 2.47822  | 2.27E-05 | hypermethylated |
| cg08594218 | 0.06073 | 0.338191351 | 2.477358 | 8.26E-06 | hypermethylated |
| cg13829550 | 0.06285 | 0.349884865 | 2.476896 | 5.58E-06 | hypermethylated |
| cg20377305 | 0.07372 | 0.41033027  | 2.476658 | 1.93E-06 | hypermethylated |
| cg24284973 | 0.04905 | 0.272936216 | 2.476239 | 3.49E-06 | hypermethylated |
| cg01452847 | 0.08256 | 0.459249189 | 2.475762 | 1.88E-06 | hypermethylated |
| cg01645753 | 0.06067 | 0.337403243 | 2.475419 | 1.26E-05 | hypermethylated |
| cg05311410 | 0.0593  | 0.329698919 | 2.475045 | 5.32E-05 | hypermethylated |
| cg27254482 | 0.06777 | 0.376788108 | 2.475035 | 4.48E-06 | hypermethylated |
| cg04370314 | 0.05048 | 0.280585946 | 2.474659 | 1.25E-05 | hypermethylated |
| cg08620044 | 0.04022 | 0.223514595 | 2.474384 | 7.22E-06 | hypermethylated |

|            |         |             |          |          |                 |
|------------|---------|-------------|----------|----------|-----------------|
| cg17307442 | 0.05634 | 0.312992973 | 2.473899 | 7.29E-05 | hypermethylated |
| cg23989963 | 0.05296 | 0.294172973 | 2.47369  | 1.33E-06 | hypermethylated |
| cg15611413 | 0.04844 | 0.268964324 | 2.473144 | 4.10E-05 | hypermethylated |
| cg19304150 | 0.05551 | 0.308212973 | 2.473108 | 1.01E-05 | hypermethylated |
| cg17045801 | 0.05282 | 0.293274595 | 2.473096 | 9.31E-06 | hypermethylated |
| cg16897114 | 0.04786 | 0.265646486 | 2.472615 | 2.35E-05 | hypermethylated |
| cg14916150 | 0.04102 | 0.227651351 | 2.472427 | 5.14E-06 | hypermethylated |
| cg14763548 | 0.05985 | 0.331931351 | 2.471462 | 2.71E-05 | hypermethylated |
| cg02250846 | 0.05804 | 0.321867027 | 2.471345 | 9.38E-07 | hypermethylated |
| cg17390350 | 0.07195 | 0.398904865 | 2.470978 | 1.04E-05 | hypermethylated |
| cg23244289 | 0.05199 | 0.288062703 | 2.470077 | 1.18E-05 | hypermethylated |
| cg10325478 | 0.04243 | 0.234991351 | 2.469451 | 1.20E-05 | hypermethylated |
| cg14248715 | 0.05096 | 0.282099459 | 2.468767 | 1.46E-05 | hypermethylated |
| cg18770350 | 0.07533 | 0.416893514 | 2.468382 | 1.99E-05 | hypermethylated |
| cg21306240 | 0.07103 | 0.392977297 | 2.467946 | 5.28E-06 | hypermethylated |
| cg21529323 | 0.03599 | 0.199063243 | 2.467559 | 1.72E-06 | hypermethylated |
| cg27094244 | 0.06303 | 0.348474054 | 2.466941 | 1.58E-05 | hypermethylated |
| cg02344833 | 0.07374 | 0.407649189 | 2.466809 | 4.48E-06 | hypermethylated |
| cg14058647 | 0.03634 | 0.200855135 | 2.466525 | 5.14E-06 | hypermethylated |
| cg19952303 | 0.04642 | 0.256497838 | 2.466128 | 1.21E-05 | hypermethylated |
| cg06610849 | 0.07647 | 0.422504324 | 2.466    | 4.07E-06 | hypermethylated |
| cg16767801 | 0.05155 | 0.284574595 | 2.464763 | 3.71E-05 | hypermethylated |
| cg18249580 | 0.05339 | 0.29470973  | 2.464653 | 7.52E-06 | hypermethylated |
| cg05221057 | 0.06082 | 0.335687568 | 2.464501 | 2.87E-06 | hypermethylated |
| cg08095196 | 0.04718 | 0.260335135 | 2.464123 | 1.58E-05 | hypermethylated |
| cg25732462 | 0.04976 | 0.274458378 | 2.463529 | 6.70E-05 | hypermethylated |
| cg16332256 | 0.04867 | 0.268416757 | 2.46337  | 2.71E-05 | hypermethylated |
| cg01878345 | 0.07839 | 0.431948649 | 2.462118 | 2.05E-06 | hypermethylated |
| cg13405887 | 0.06216 | 0.342474054 | 2.461936 | 0.000113 | hypermethylated |
| cg12825070 | 0.07303 | 0.402249189 | 2.461528 | 3.07E-05 | hypermethylated |
| cg25024074 | 0.06261 | 0.344854054 | 2.461521 | 1.64E-05 | hypermethylated |
| cg25633678 | 0.06495 | 0.357704865 | 2.461368 | 8.71E-06 | hypermethylated |
| cg26210445 | 0.07005 | 0.385712973 | 2.461071 | 5.58E-06 | hypermethylated |
| cg10731700 | 0.05564 | 0.30631027  | 2.460799 | 3.32E-05 | hypermethylated |
| cg08146483 | 0.06725 | 0.370218378 | 2.46077  | 3.49E-06 | hypermethylated |
| cg22821908 | 0.04215 | 0.231867568 | 2.459697 | 6.39E-06 | hypermethylated |
| cg13596833 | 0.05441 | 0.299248108 | 2.459398 | 1.42E-05 | hypermethylated |
| cg06248560 | 0.05303 | 0.291647568 | 2.459345 | 1.09E-05 | hypermethylated |
| cg26993198 | 0.04552 | 0.250247027 | 2.45878  | 1.09E-05 | hypermethylated |
| cg20800509 | 0.06404 | 0.352032432 | 2.458663 | 9.57E-06 | hypermethylated |
| cg10795666 | 0.05536 | 0.304213514 | 2.458168 | 0.000198 | hypermethylated |
| cg24792289 | 0.05696 | 0.312588649 | 2.456244 | 5.14E-06 | hypermethylated |
| cg05196969 | 0.04939 | 0.270987027 | 2.455933 | 6.75E-06 | hypermethylated |
| cg24387472 | 0.04919 | 0.269810811 | 2.455511 | 2.71E-05 | hypermethylated |
| cg23881278 | 0.07011 | 0.384182703 | 2.4541   | 6.75E-06 | hypermethylated |
| cg10755235 | 0.05567 | 0.305024865 | 2.453955 | 2.05E-06 | hypermethylated |
| cg12075445 | 0.05543 | 0.303627568 | 2.453564 | 6.70E-05 | hypermethylated |
| cg26049726 | 0.04925 | 0.269736757 | 2.453356 | 2.32E-06 | hypermethylated |
| cg03230154 | 0.06242 | 0.341825405 | 2.453179 | 1.93E-06 | hypermethylated |
| cg04764012 | 0.03591 | 0.196581081 | 2.452667 | 3.69E-06 | hypermethylated |
| cg08236767 | 0.05801 | 0.317447568 | 2.452145 | 6.38E-05 | hypermethylated |
| cg23170850 | 0.03749 | 0.20507027  | 2.451541 | 2.95E-06 | hypermethylated |
| cg13046832 | 0.05786 | 0.316460541 | 2.451387 | 5.73E-06 | hypermethylated |
| cg16409261 | 0.05712 | 0.312407568 | 2.451362 | 5.81E-06 | hypermethylated |
| cg18172877 | 0.05936 | 0.324553514 | 2.450893 | 5.28E-06 | hypermethylated |
| cg14662355 | 0.04498 | 0.245900541 | 2.450719 | 4.24E-06 | hypermethylated |
| cg20008332 | 0.03695 | 0.201987568 | 2.45062  | 7.12E-06 | hypermethylated |
| cg17397592 | 0.06091 | 0.332890811 | 2.450298 | 3.90E-06 | hypermethylated |

|            |         |             |          |          |                 |
|------------|---------|-------------|----------|----------|-----------------|
| cg11337945 | 0.05249 | 0.286801081 | 2.449936 | 1.88E-06 | hypermethylated |
| cg02457680 | 0.0705  | 0.385193514 | 2.449888 | 2.64E-06 | hypermethylated |
| cg26818735 | 0.07026 | 0.383570811 | 2.448717 | 4.86E-06 | hypermethylated |
| cg03813164 | 0.05556 | 0.303272973 | 2.448498 | 4.64E-05 | hypermethylated |
| cg04534765 | 0.07417 | 0.404738378 | 2.448082 | 3.35E-06 | hypermethylated |
| cg25400229 | 0.04564 | 0.249051351 | 2.448073 | 4.94E-05 | hypermethylated |
| cg21646598 | 0.05052 | 0.275667027 | 2.448    | 4.18E-06 | hypermethylated |
| cg18213472 | 0.04865 | 0.26539027  | 2.447604 | 2.21E-05 | hypermethylated |
| cg18863333 | 0.02603 | 0.141828108 | 2.445896 | 2.95E-06 | hypermethylated |
| cg16729415 | 0.0919  | 0.500727027 | 2.445888 | 6.57E-06 | hypermethylated |
| cg14267095 | 0.05886 | 0.320475676 | 2.444855 | 1.23E-05 | hypermethylated |
| cg10784386 | 0.0524  | 0.285269189 | 2.444685 | 6.30E-06 | hypermethylated |
| cg15745900 | 0.05034 | 0.274047027 | 2.444646 | 6.86E-05 | hypermethylated |
| cg14409023 | 0.05095 | 0.277352432 | 2.444566 | 2.81E-05 | hypermethylated |
| cg23771603 | 0.05493 | 0.298954054 | 2.444258 | 5.86E-05 | hypermethylated |
| cg03024760 | 0.06248 | 0.340005405 | 2.444091 | 4.30E-06 | hypermethylated |
| cg12248614 | 0.0583  | 0.317138919 | 2.443547 | 0.000189 | hypermethylated |
| cg04035209 | 0.04422 | 0.240508108 | 2.443315 | 6.66E-06 | hypermethylated |
| cg24221648 | 0.09653 | 0.524672973 | 2.442369 | 2.95E-06 | hypermethylated |
| cg23813156 | 0.04529 | 0.246081081 | 2.441869 | 1.02E-06 | hypermethylated |
| cg06831576 | 0.07112 | 0.386011351 | 2.440316 | 6.39E-06 | hypermethylated |
| cg21039708 | 0.09206 | 0.499528108 | 2.43992  | 4.12E-06 | hypermethylated |
| cg16848624 | 0.04257 | 0.230976757 | 2.439839 | 8.22E-05 | hypermethylated |
| cg21264189 | 0.05976 | 0.324236216 | 2.439793 | 2.42E-05 | hypermethylated |
| cg13696942 | 0.05411 | 0.293567568 | 2.439725 | 3.49E-06 | hypermethylated |
| cg00582971 | 0.08886 | 0.482008649 | 2.439453 | 4.12E-06 | hypermethylated |
| cg14625175 | 0.06708 | 0.363836757 | 2.439337 | 6.01E-05 | hypermethylated |
| cg16896079 | 0.04874 | 0.264284324 | 2.438913 | 6.95E-05 | hypermethylated |
| cg10439765 | 0.06301 | 0.341646486 | 2.438852 | 1.63E-06 | hypermethylated |
| cg01783070 | 0.05988 | 0.324620541 | 2.438608 | 1.50E-05 | hypermethylated |
| cg19186145 | 0.062   | 0.335954595 | 2.437926 | 0.00049  | hypermethylated |
| cg03524083 | 0.04973 | 0.269465946 | 2.437915 | 4.18E-06 | hypermethylated |
| cg14502484 | 0.07319 | 0.396572973 | 2.437868 | 7.52E-06 | hypermethylated |
| cg23891360 | 0.0591  | 0.319883784 | 2.436318 | 6.30E-06 | hypermethylated |
| cg10739556 | 0.06571 | 0.355656757 | 2.436301 | 5.89E-06 | hypermethylated |
| cg17039236 | 0.0586  | 0.317121081 | 2.436061 | 5.43E-06 | hypermethylated |
| cg20927661 | 0.07805 | 0.42234     | 2.435934 | 3.79E-06 | hypermethylated |
| cg16827475 | 0.08101 | 0.438228649 | 2.435512 | 1.37E-06 | hypermethylated |
| cg25975712 | 0.05364 | 0.290048108 | 2.434911 | 9.95E-05 | hypermethylated |
| cg19810598 | 0.04744 | 0.256492973 | 2.434743 | 2.39E-05 | hypermethylated |
| cg10812708 | 0.0434  | 0.234550811 | 2.434134 | 4.01E-06 | hypermethylated |
| cg13210260 | 0.03531 | 0.190707027 | 2.433209 | 1.04E-05 | hypermethylated |
| cg21383810 | 0.06267 | 0.338476216 | 2.433208 | 5.32E-05 | hypermethylated |
| cg20985450 | 0.06788 | 0.366484324 | 2.432693 | 1.68E-05 | hypermethylated |
| cg05997350 | 0.04731 | 0.255401081 | 2.432548 | 1.54E-05 | hypermethylated |
| cg17926940 | 0.0446  | 0.240658378 | 2.431871 | 4.67E-06 | hypermethylated |
| cg14373923 | 0.04868 | 0.262615676 | 2.431552 | 1.84E-05 | hypermethylated |
| cg13437581 | 0.05362 | 0.289031892 | 2.430386 | 5.28E-06 | hypermethylated |
| cg25081106 | 0.06254 | 0.337032973 | 2.430039 | 7.84E-05 | hypermethylated |
| cg27134816 | 0.04482 | 0.241505946 | 2.429844 | 1.04E-05 | hypermethylated |
| cg22167515 | 0.07059 | 0.380279459 | 2.429524 | 5.89E-06 | hypermethylated |
| cg12676149 | 0.06172 | 0.332491351 | 2.429507 | 1.22E-06 | hypermethylated |
| cg10184889 | 0.04425 | 0.238219459 | 2.428542 | 5.43E-06 | hypermethylated |
| cg20664238 | 0.05989 | 0.321864324 | 2.426066 | 1.82E-05 | hypermethylated |
| cg08572734 | 0.04268 | 0.229290811 | 2.425546 | 7.41E-06 | hypermethylated |
| cg07213060 | 0.04481 | 0.240656757 | 2.425084 | 6.39E-06 | hypermethylated |
| cg17240815 | 0.04342 | 0.233163784 | 2.424912 | 2.81E-05 | hypermethylated |
| cg13703871 | 0.07499 | 0.402637297 | 2.424711 | 3.49E-06 | hypermethylated |

|            |         |             |          |          |                 |
|------------|---------|-------------|----------|----------|-----------------|
| cg16348470 | 0.06525 | 0.350289189 | 2.424497 | 3.64E-06 | hypermethylated |
| cg23774356 | 0.0731  | 0.392346486 | 2.424185 | 7.20E-05 | hypermethylated |
| cg13092806 | 0.07681 | 0.412244324 | 2.424134 | 1.30E-05 | hypermethylated |
| cg03234732 | 0.0529  | 0.283870811 | 2.423895 | 3.30E-06 | hypermethylated |
| cg08768852 | 0.08713 | 0.467498378 | 2.42372  | 8.37E-06 | hypermethylated |
| cg02043159 | 0.06258 | 0.335495135 | 2.422518 | 1.35E-05 | hypermethylated |
| cg15489250 | 0.05411 | 0.290023243 | 2.422201 | 4.70E-05 | hypermethylated |
| cg26630231 | 0.06127 | 0.328342162 | 2.421947 | 3.90E-06 | hypermethylated |
| cg22665696 | 0.04852 | 0.259957838 | 2.421626 | 9.44E-06 | hypermethylated |
| cg00159100 | 0.05367 | 0.287475676 | 2.421252 | 1.87E-05 | hypermethylated |
| cg02119363 | 0.05245 | 0.280896757 | 2.421025 | 1.21E-05 | hypermethylated |
| cg16422098 | 0.05813 | 0.3113      | 2.420951 | 1.94E-05 | hypermethylated |
| cg21818713 | 0.05007 | 0.268064324 | 2.420561 | 5.28E-06 | hypermethylated |
| cg15173134 | 0.06996 | 0.374392973 | 2.419951 | 4.53E-05 | hypermethylated |
| cg18856581 | 0.07086 | 0.379206486 | 2.41994  | 5.00E-06 | hypermethylated |
| cg09513990 | 0.0624  | 0.333921622 | 2.419892 | 1.22E-06 | hypermethylated |
| cg12918457 | 0.07824 | 0.418630811 | 2.4197   | 8.71E-06 | hypermethylated |
| cg03505117 | 0.06307 | 0.337405946 | 2.41946  | 5.73E-06 | hypermethylated |
| cg02587316 | 0.06959 | 0.372262162 | 2.419367 | 4.24E-06 | hypermethylated |
| cg20634967 | 0.05775 | 0.308812432 | 2.418838 | 6.93E-06 | hypermethylated |
| cg00400832 | 0.06156 | 0.329119459 | 2.418546 | 7.86E-07 | hypermethylated |
| cg10196720 | 0.06359 | 0.339872973 | 2.418124 | 7.12E-06 | hypermethylated |
| cg27084746 | 0.06003 | 0.320622162 | 2.417119 | 1.21E-05 | hypermethylated |
| cg17218713 | 0.0598  | 0.319356216 | 2.416949 | 0.000113 | hypermethylated |
| cg03169018 | 0.0467  | 0.249394595 | 2.416936 | 5.43E-06 | hypermethylated |
| cg08358166 | 0.06225 | 0.332293514 | 2.416312 | 2.15E-05 | hypermethylated |
| cg17079833 | 0.05296 | 0.282547027 | 2.415516 | 3.76E-05 | hypermethylated |
| cg24886257 | 0.05925 | 0.316099459 | 2.415492 | 6.05E-06 | hypermethylated |
| cg23217126 | 0.04274 | 0.227933514 | 2.414954 | 3.04E-06 | hypermethylated |
| cg22052659 | 0.05707 | 0.304274054 | 2.414567 | 8.60E-06 | hypermethylated |
| cg07808555 | 0.05584 | 0.297655676 | 2.414274 | 7.41E-06 | hypermethylated |
| cg03563308 | 0.04108 | 0.218888649 | 2.413689 | 2.74E-05 | hypermethylated |
| cg25260137 | 0.06126 | 0.326403784 | 2.413641 | 6.75E-06 | hypermethylated |
| cg02172150 | 0.06514 | 0.347014595 | 2.413381 | 2.87E-06 | hypermethylated |
| cg25339566 | 0.06984 | 0.371822703 | 2.412489 | 9.82E-06 | hypermethylated |
| cg21578219 | 0.06225 | 0.331201622 | 2.411564 | 1.52E-05 | hypermethylated |
| cg03062549 | 0.05711 | 0.303827568 | 2.411437 | 2.79E-06 | hypermethylated |
| cg08627720 | 0.0342  | 0.181856216 | 2.41073  | 1.06E-05 | hypermethylated |
| cg15679813 | 0.06313 | 0.33527027  | 2.408927 | 4.53E-05 | hypermethylated |
| cg00495860 | 0.06947 | 0.368848108 | 2.408565 | 3.21E-06 | hypermethylated |
| cg20052718 | 0.03255 | 0.172803784 | 2.408405 | 1.73E-05 | hypermethylated |
| cg08969532 | 0.04906 | 0.260420541 | 2.408224 | 7.20E-05 | hypermethylated |
| cg17526573 | 0.08579 | 0.454998919 | 2.406982 | 1.93E-06 | hypermethylated |
| cg17629929 | 0.05789 | 0.306892432 | 2.406347 | 2.04E-05 | hypermethylated |
| cg27323784 | 0.0608  | 0.32228973  | 2.406215 | 1.12E-05 | hypermethylated |
| cg06962944 | 0.06664 | 0.353209189 | 2.406063 | 2.96E-05 | hypermethylated |
| cg27652464 | 0.04261 | 0.225795676 | 2.405754 | 7.32E-06 | hypermethylated |
| cg24599434 | 0.04399 | 0.233037297 | 2.405313 | 1.93E-06 | hypermethylated |
| cg08279008 | 0.06135 | 0.324916757 | 2.404935 | 5.89E-06 | hypermethylated |
| cg11638181 | 0.06058 | 0.320705946 | 2.404338 | 1.15E-05 | hypermethylated |
| cg14861089 | 0.06489 | 0.343387027 | 2.403767 | 1.35E-05 | hypermethylated |
| cg17621718 | 0.06709 | 0.354804324 | 2.402854 | 3.04E-06 | hypermethylated |
| cg00963169 | 0.06507 | 0.344034054 | 2.402487 | 1.12E-05 | hypermethylated |
| cg15692992 | 0.05525 | 0.291831351 | 2.401089 | 4.01E-06 | hypermethylated |
| cg12317601 | 0.05619 | 0.296787027 | 2.401043 | 4.01E-06 | hypermethylated |
| cg27528660 | 0.04172 | 0.220280541 | 2.400531 | 4.53E-05 | hypermethylated |
| cg01882870 | 0.05294 | 0.279348108 | 2.399634 | 5.19E-07 | hypermethylated |
| cg23720732 | 0.05305 | 0.27986     | 2.399281 | 0.000324 | hypermethylated |

|            |         |             |          |          |                 |
|------------|---------|-------------|----------|----------|-----------------|
| cg16783279 | 0.07095 | 0.374222162 | 2.39902  | 4.48E-06 | hypermethylated |
| cg24203741 | 0.05329 | 0.280899459 | 2.398117 | 6.23E-05 | hypermethylated |
| cg03530754 | 0.08339 | 0.439316757 | 2.397315 | 3.69E-06 | hypermethylated |
| cg07090701 | 0.04569 | 0.240643784 | 2.396949 | 2.15E-05 | hypermethylated |
| cg12374721 | 0.08593 | 0.45246     | 2.396556 | 4.24E-06 | hypermethylated |
| cg06558014 | 0.06147 | 0.323626486 | 2.396375 | 1.21E-05 | hypermethylated |
| cg23913421 | 0.0629  | 0.331088108 | 2.396083 | 2.10E-06 | hypermethylated |
| cg17803868 | 0.04546 | 0.239161622 | 2.395316 | 7.29E-05 | hypermethylated |
| cg24720580 | 0.02359 | 0.123932432 | 2.393306 | 7.52E-06 | hypermethylated |
| cg00970313 | 0.05838 | 0.30668     | 2.393188 | 3.19E-05 | hypermethylated |
| cg00795341 | 0.05251 | 0.275700541 | 2.392438 | 7.03E-06 | hypermethylated |
| cg24912438 | 0.04741 | 0.248861622 | 2.39208  | 2.13E-05 | hypermethylated |
| cg24483247 | 0.05171 | 0.271368649 | 2.391739 | 4.70E-05 | hypermethylated |
| cg07529754 | 0.05104 | 0.267723784 | 2.391045 | 2.64E-06 | hypermethylated |
| cg06962177 | 0.08455 | 0.443441081 | 2.390866 | 3.08E-06 | hypermethylated |
| cg13982529 | 0.066   | 0.346121622 | 2.390741 | 3.90E-06 | hypermethylated |
| cg17264670 | 0.0615  | 0.322416216 | 2.390266 | 0.000116 | hypermethylated |
| cg09016242 | 0.08325 | 0.436358919 | 2.389993 | 4.18E-06 | hypermethylated |
| cg23208513 | 0.05569 | 0.291869189 | 2.389832 | 3.39E-06 | hypermethylated |
| cg23229395 | 0.05003 | 0.262077297 | 2.389127 | 1.56E-05 | hypermethylated |
| cg05928342 | 0.0598  | 0.313141081 | 2.388595 | 4.48E-06 | hypermethylated |
| cg13201808 | 0.07084 | 0.370594595 | 2.387206 | 1.50E-05 | hypermethylated |
| cg17316316 | 0.05836 | 0.305270811 | 2.387038 | 3.59E-06 | hypermethylated |
| cg09022943 | 0.04102 | 0.214498919 | 2.386571 | 2.48E-05 | hypermethylated |
| cg03140968 | 0.05032 | 0.263127568 | 2.386559 | 1.28E-05 | hypermethylated |
| cg25405145 | 0.04412 | 0.230703784 | 2.386537 | 1.11E-05 | hypermethylated |
| cg08315202 | 0.09129 | 0.477283243 | 2.386317 | 5.00E-06 | hypermethylated |
| cg15104644 | 0.05229 | 0.273364324 | 2.386218 | 5.72E-05 | hypermethylated |
| cg26858704 | 0.05541 | 0.289543784 | 2.385563 | 4.26E-05 | hypermethylated |
| cg01729827 | 0.07184 | 0.375245946 | 2.384977 | 7.32E-06 | hypermethylated |
| cg08383315 | 0.06603 | 0.344718919 | 2.384227 | 5.14E-06 | hypermethylated |
| cg03602280 | 0.08345 | 0.435651892 | 2.384192 | 8.37E-06 | hypermethylated |
| cg25652029 | 0.05068 | 0.26454973  | 2.384051 | 0.000109 | hypermethylated |
| cg08272731 | 0.08473 | 0.442218919 | 2.383816 | 3.30E-06 | hypermethylated |
| cg11267630 | 0.06343 | 0.331049189 | 2.383808 | 1.14E-05 | hypermethylated |
| cg13461241 | 0.0518  | 0.270323243 | 2.383662 | 3.69E-06 | hypermethylated |
| cg22634891 | 0.03726 | 0.194284865 | 2.382474 | 4.88E-05 | hypermethylated |
| cg26429655 | 0.06087 | 0.3173      | 2.382044 | 1.52E-05 | hypermethylated |
| cg20846447 | 0.04092 | 0.213251892 | 2.38168  | 2.60E-06 | hypermethylated |
| cg06204922 | 0.05072 | 0.264224324 | 2.381137 | 1.80E-05 | hypermethylated |
| cg19727439 | 0.05693 | 0.296454054 | 2.380548 | 2.27E-05 | hypermethylated |
| cg05743346 | 0.06141 | 0.319747027 | 2.380385 | 1.14E-05 | hypermethylated |
| cg07071978 | 0.04583 | 0.238551351 | 2.379936 | 9.69E-06 | hypermethylated |
| cg12395205 | 0.06257 | 0.325505405 | 2.379138 | 1.09E-05 | hypermethylated |
| cg12079322 | 0.06011 | 0.312667027 | 2.37895  | 2.38E-05 | hypermethylated |
| cg05417162 | 0.04902 | 0.254956757 | 2.37881  | 1.54E-06 | hypermethylated |
| cg02970836 | 0.08952 | 0.465479459 | 2.378436 | 4.12E-06 | hypermethylated |
| cg25655234 | 0.04778 | 0.248098919 | 2.376437 | 0.000207 | hypermethylated |
| cg18401367 | 0.06829 | 0.354577838 | 2.376356 | 4.36E-05 | hypermethylated |
| cg17424999 | 0.05185 | 0.269186486 | 2.37619  | 9.07E-06 | hypermethylated |
| cg23965689 | 0.04456 | 0.231234054 | 2.375533 | 5.89E-06 | hypermethylated |
| cg13661740 | 0.05746 | 0.297942703 | 2.374405 | 6.70E-05 | hypermethylated |
| cg27062795 | 0.06662 | 0.345376216 | 2.374141 | 3.23E-05 | hypermethylated |
| cg01445580 | 0.07245 | 0.375468108 | 2.373633 | 1.84E-05 | hypermethylated |
| cg14654886 | 0.08304 | 0.430218378 | 2.373191 | 2.81E-05 | hypermethylated |
| cg10831607 | 0.0616  | 0.318990811 | 2.372513 | 5.35E-06 | hypermethylated |
| cg04243827 | 0.04947 | 0.256134595 | 2.372276 | 3.30E-06 | hypermethylated |
| cg14667871 | 0.05523 | 0.285948649 | 2.372232 | 2.61E-05 | hypermethylated |

|            |         |             |          |          |                 |
|------------|---------|-------------|----------|----------|-----------------|
| cg21200129 | 0.03703 | 0.191686486 | 2.371982 | 4.10E-05 | hypermethylated |
| cg03184290 | 0.07974 | 0.412745946 | 2.371879 | 1.77E-06 | hypermethylated |
| cg05396987 | 0.05437 | 0.28138973  | 2.371687 | 4.46E-07 | hypermethylated |
| cg06273376 | 0.06283 | 0.325032432 | 2.371058 | 1.46E-05 | hypermethylated |
| cg01729717 | 0.06016 | 0.311204324 | 2.370986 | 9.69E-06 | hypermethylated |
| cg16086620 | 0.07822 | 0.404377297 | 2.370093 | 1.23E-05 | hypermethylated |
| cg21545862 | 0.07624 | 0.394132432 | 2.37006  | 3.21E-06 | hypermethylated |
| cg10617909 | 0.07868 | 0.40662     | 2.369612 | 8.15E-06 | hypermethylated |
| cg22623133 | 0.04943 | 0.25536973  | 2.369129 | 5.73E-06 | hypermethylated |
| cg09165441 | 0.07633 | 0.394254595 | 2.368805 | 1.11E-05 | hypermethylated |
| cg13324546 | 0.05866 | 0.30296973  | 2.368725 | 1.54E-05 | hypermethylated |
| cg01054478 | 0.06823 | 0.352331351 | 2.368455 | 7.32E-06 | hypermethylated |
| cg06872705 | 0.05294 | 0.27330973  | 2.368107 | 2.49E-06 | hypermethylated |
| cg15885337 | 0.0661  | 0.341060541 | 2.367306 | 1.08E-05 | hypermethylated |
| cg08378830 | 0.05304 | 0.273576757 | 2.366793 | 1.12E-05 | hypermethylated |
| cg05471296 | 0.06722 | 0.346674595 | 2.36662  | 2.10E-06 | hypermethylated |
| cg11667020 | 0.03509 | 0.180914595 | 2.366177 | 6.39E-06 | hypermethylated |
| cg08002883 | 0.06523 | 0.336282162 | 2.366065 | 0.000176 | hypermethylated |
| cg19764599 | 0.05163 | 0.266117297 | 2.365781 | 3.44E-05 | hypermethylated |
| cg00790098 | 0.05122 | 0.263953514 | 2.365505 | 3.15E-05 | hypermethylated |
| cg23797411 | 0.07473 | 0.384974595 | 2.365004 | 2.79E-06 | hypermethylated |
| cg25480336 | 0.05647 | 0.290808108 | 2.364511 | 0.000474 | hypermethylated |
| cg18349911 | 0.04271 | 0.219792973 | 2.363499 | 2.35E-05 | hypermethylated |
| cg25104105 | 0.07269 | 0.374030811 | 2.363328 | 3.40E-05 | hypermethylated |
| cg19406736 | 0.04805 | 0.247236757 | 2.363285 | 3.12E-06 | hypermethylated |
| cg18652900 | 0.07439 | 0.38275027  | 2.363223 | 6.93E-06 | hypermethylated |
| cg15554678 | 0.05265 | 0.270644324 | 2.361893 | 1.35E-05 | hypermethylated |
| cg17985646 | 0.09214 | 0.473637297 | 2.361883 | 9.57E-06 | hypermethylated |
| cg08190291 | 0.0555  | 0.285254054 | 2.361688 | 1.89E-05 | hypermethylated |
| cg19871940 | 0.06139 | 0.315385946 | 2.361043 | 1.84E-05 | hypermethylated |
| cg10021878 | 0.05091 | 0.261351892 | 2.359973 | 1.06E-05 | hypermethylated |
| cg06215569 | 0.07501 | 0.384987568 | 2.359657 | 1.43E-06 | hypermethylated |
| cg24604013 | 0.07998 | 0.410389189 | 2.359282 | 1.65E-06 | hypermethylated |
| cg16433156 | 0.04139 | 0.212325946 | 2.358927 | 1.72E-06 | hypermethylated |
| cg13320291 | 0.06363 | 0.326268108 | 2.358279 | 0.000109 | hypermethylated |
| cg03354113 | 0.06268 | 0.321311892 | 2.357897 | 4.88E-05 | hypermethylated |
| cg17214381 | 0.07427 | 0.380654054 | 2.357629 | 6.39E-06 | hypermethylated |
| cg00663077 | 0.08077 | 0.413543243 | 2.356147 | 5.07E-06 | hypermethylated |
| cg01843946 | 0.0532  | 0.272384324 | 2.356146 | 1.48E-05 | hypermethylated |
| cg20417527 | 0.04599 | 0.23531027  | 2.355172 | 1.26E-05 | hypermethylated |
| cg02825373 | 0.06558 | 0.335517838 | 2.355062 | 2.42E-06 | hypermethylated |
| cg10023272 | 0.03807 | 0.194757838 | 2.354955 | 4.24E-06 | hypermethylated |
| cg01815529 | 0.05487 | 0.280664865 | 2.354759 | 5.93E-05 | hypermethylated |
| cg18023283 | 0.08244 | 0.421283243 | 2.353374 | 5.65E-06 | hypermethylated |
| cg03357798 | 0.07303 | 0.37305027  | 2.352809 | 2.39E-05 | hypermethylated |
| cg06457317 | 0.05732 | 0.292712973 | 2.352376 | 1.52E-05 | hypermethylated |
| cg09558195 | 0.04593 | 0.234548108 | 2.352375 | 6.66E-06 | hypermethylated |
| cg15680755 | 0.04988 | 0.254675676 | 2.352128 | 1.87E-05 | hypermethylated |
| cg23244488 | 0.07604 | 0.388237297 | 2.352108 | 2.42E-06 | hypermethylated |
| cg20527270 | 0.06184 | 0.315733514 | 2.352095 | 2.15E-05 | hypermethylated |
| cg02456226 | 0.07486 | 0.382102703 | 2.351694 | 6.84E-06 | hypermethylated |
| cg08475953 | 0.08804 | 0.449335135 | 2.351561 | 2.36E-06 | hypermethylated |
| cg10192893 | 0.06976 | 0.356023243 | 2.351499 | 2.46E-06 | hypermethylated |
| cg03048654 | 0.06896 | 0.351845946 | 2.351112 | 5.89E-06 | hypermethylated |
| cg12072560 | 0.06756 | 0.344658378 | 2.350926 | 1.58E-05 | hypermethylated |
| cg13567542 | 0.07568 | 0.386047027 | 2.350793 | 1.15E-06 | hypermethylated |
| cg02256049 | 0.06898 | 0.351796757 | 2.350492 | 1.50E-05 | hypermethylated |
| cg05178576 | 0.06138 | 0.312963784 | 2.350155 | 2.61E-05 | hypermethylated |



|            |         |             |          |          |                 |
|------------|---------|-------------|----------|----------|-----------------|
| cg08377819 | 0.05399 | 0.275182703 | 2.349626 | 3.15E-05 | hypermethylated |
| cg13019491 | 0.07433 | 0.378641081 | 2.348814 | 1.28E-05 | hypermethylated |
| cg25784220 | 0.06423 | 0.327154054 | 2.348651 | 0.0002   | hypermethylated |
| cg26715571 | 0.04335 | 0.220752973 | 2.348329 | 0.000237 | hypermethylated |
| cg01593190 | 0.04981 | 0.253592432 | 2.348004 | 1.54E-05 | hypermethylated |
| cg16787600 | 0.06526 | 0.332249189 | 2.347995 | 7.83E-06 | hypermethylated |
| cg10972973 | 0.04704 | 0.239475676 | 2.347919 | 1.23E-05 | hypermethylated |
| cg18552380 | 0.05206 | 0.265013514 | 2.347819 | 2.29E-06 | hypermethylated |
| cg10680051 | 0.05299 | 0.269704324 | 2.347587 | 7.29E-05 | hypermethylated |
| cg04118306 | 0.04269 | 0.217254054 | 2.347413 | 1.02E-05 | hypermethylated |
| cg14627172 | 0.06892 | 0.350727027 | 2.347354 | 3.04E-06 | hypermethylated |
| cg07612562 | 0.0606  | 0.308364865 | 2.347249 | 1.42E-05 | hypermethylated |
| cg20495645 | 0.05462 | 0.277874054 | 2.34693  | 9.16E-05 | hypermethylated |
| cg12511214 | 0.05968 | 0.303495676 | 2.346357 | 1.89E-05 | hypermethylated |
| cg13544006 | 0.05844 | 0.297168108 | 2.346251 | 2.15E-05 | hypermethylated |
| cg26296488 | 0.10184 | 0.517798919 | 2.346088 | 3.74E-06 | hypermethylated |
| cg09835225 | 0.07349 | 0.373463784 | 2.345348 | 1.99E-05 | hypermethylated |
| cg14669274 | 0.08413 | 0.427363784 | 2.344772 | 4.12E-06 | hypermethylated |
| cg24430140 | 0.07723 | 0.392198919 | 2.344352 | 5.43E-06 | hypermethylated |
| cg00983904 | 0.07676 | 0.38977027  | 2.344197 | 1.77E-05 | hypermethylated |
| cg13724788 | 0.0575  | 0.291685405 | 2.342779 | 7.75E-05 | hypermethylated |
| cg09149648 | 0.05574 | 0.282735135 | 2.342666 | 5.45E-05 | hypermethylated |
| cg08850461 | 0.07609 | 0.385937297 | 2.342588 | 5.07E-06 | hypermethylated |
| cg10333808 | 0.06736 | 0.341290811 | 2.341038 | 6.48E-06 | hypermethylated |
| cg12951849 | 0.05889 | 0.298372432 | 2.34102  | 1.39E-05 | hypermethylated |
| cg08448701 | 0.06048 | 0.30635027  | 2.340652 | 2.04E-05 | hypermethylated |
| cg24686074 | 0.05848 | 0.296205946 | 2.340585 | 8.63E-05 | hypermethylated |
| cg27641522 | 0.02958 | 0.149823243 | 2.340568 | 1.31E-05 | hypermethylated |
| cg04330449 | 0.07636 | 0.386724865 | 2.340419 | 2.04E-05 | hypermethylated |
| cg23642130 | 0.09081 | 0.459814054 | 2.340127 | 1.54E-05 | hypermethylated |
| cg11842610 | 0.06083 | 0.307785405 | 2.33907  | 2.57E-05 | hypermethylated |
| cg02430692 | 0.05228 | 0.264249189 | 2.337568 | 4.12E-06 | hypermethylated |
| cg12175729 | 0.07418 | 0.374750811 | 2.336829 | 8.32E-05 | hypermethylated |
| cg16403344 | 0.05917 | 0.298854054 | 2.336503 | 9.27E-05 | hypermethylated |
| cg22327646 | 0.0585  | 0.295285405 | 2.335602 | 1.99E-06 | hypermethylated |
| cg17480760 | 0.07617 | 0.384475135 | 2.335595 | 1.02E-06 | hypermethylated |
| cg10410142 | 0.05662 | 0.285407568 | 2.33364  | 3.15E-05 | hypermethylated |
| cg07027251 | 0.04623 | 0.233011892 | 2.333502 | 3.26E-06 | hypermethylated |
| cg12028548 | 0.03835 | 0.193282162 | 2.33341  | 1.09E-05 | hypermethylated |
| cg27207308 | 0.05871 | 0.295877297 | 2.333321 | 2.92E-05 | hypermethylated |
| cg06652199 | 0.04758 | 0.239687568 | 2.332728 | 3.85E-06 | hypermethylated |
| cg03450948 | 0.07085 | 0.35686     | 2.332518 | 0.000108 | hypermethylated |
| cg13930892 | 0.06876 | 0.346273514 | 2.332271 | 2.71E-05 | hypermethylated |
| cg04434339 | 0.05504 | 0.277174054 | 2.33224  | 4.05E-05 | hypermethylated |
| cg04673590 | 0.04895 | 0.2463      | 2.331036 | 5.45E-05 | hypermethylated |
| cg20844851 | 0.0659  | 0.331412973 | 2.33028  | 1.73E-05 | hypermethylated |
| cg07142797 | 0.05909 | 0.297088649 | 2.329908 | 1.99E-05 | hypermethylated |
| cg07502439 | 0.04911 | 0.246892432 | 2.329794 | 6.22E-06 | hypermethylated |
| cg05994320 | 0.0358  | 0.179958919 | 2.329636 | 2.02E-05 | hypermethylated |
| cg15230781 | 0.06132 | 0.308205405 | 2.329463 | 1.15E-05 | hypermethylated |
| cg23068913 | 0.06127 | 0.307871351 | 2.329075 | 7.52E-06 | hypermethylated |
| cg13279673 | 0.05989 | 0.300683243 | 2.327857 | 2.49E-06 | hypermethylated |
| cg18129621 | 0.05611 | 0.281705405 | 2.327857 | 3.36E-05 | hypermethylated |
| cg02027945 | 0.08204 | 0.411707568 | 2.327221 | 2.42E-05 | hypermethylated |
| cg18530551 | 0.06251 | 0.313646486 | 2.32698  | 1.08E-05 | hypermethylated |
| cg21229268 | 0.06366 | 0.319181081 | 2.325916 | 1.31E-05 | hypermethylated |
| cg13689003 | 0.06211 | 0.311342703 | 2.325606 | 0.0002   | hypermethylated |
| cg13678973 | 0.07874 | 0.394561081 | 2.32508  | 1.56E-05 | hypermethylated |

|            |         |             |          |          |                 |
|------------|---------|-------------|----------|----------|-----------------|
| cg23737737 | 0.07419 | 0.371419459 | 2.323753 | 2.21E-05 | hypermethylated |
| cg25188395 | 0.07402 | 0.370385405 | 2.32304  | 1.54E-06 | hypermethylated |
| cg06204735 | 0.07387 | 0.36963027  | 2.323022 | 3.49E-05 | hypermethylated |
| cg19156875 | 0.07344 | 0.36746973  | 2.322987 | 4.48E-06 | hypermethylated |
| cg00459623 | 0.06414 | 0.320778378 | 2.322281 | 2.89E-05 | hypermethylated |
| cg22153181 | 0.08117 | 0.405725405 | 2.321485 | 2.71E-06 | hypermethylated |
| cg02623991 | 0.06752 | 0.337351892 | 2.320867 | 3.85E-05 | hypermethylated |
| cg11002404 | 0.05281 | 0.263847568 | 2.320822 | 0.000187 | hypermethylated |
| cg02281208 | 0.0733  | 0.365821081 | 2.319253 | 2.49E-06 | hypermethylated |
| cg14186641 | 0.06774 | 0.338067568 | 2.319232 | 6.46E-05 | hypermethylated |
| cg26639039 | 0.0331  | 0.165169189 | 2.319041 | 1.85E-06 | hypermethylated |
| cg08640634 | 0.06643 | 0.331449189 | 2.318881 | 1.94E-05 | hypermethylated |
| cg15186181 | 0.0765  | 0.381652432 | 2.318728 | 1.54E-05 | hypermethylated |
| cg17307479 | 0.05419 | 0.270309189 | 2.318512 | 0.000259 | hypermethylated |
| cg02858606 | 0.05376 | 0.268123784 | 2.318294 | 1.73E-05 | hypermethylated |
| cg23754772 | 0.04425 | 0.220590811 | 2.317623 | 1.82E-05 | hypermethylated |
| cg16709232 | 0.07508 | 0.374253514 | 2.317515 | 4.36E-06 | hypermethylated |
| cg18795809 | 0.07426 | 0.369977297 | 2.31678  | 8.73E-05 | hypermethylated |
| cg15928093 | 0.05935 | 0.295615135 | 2.3164   | 5.72E-05 | hypermethylated |
| cg10864319 | 0.05636 | 0.280695676 | 2.316263 | 0.000187 | hypermethylated |
| cg01791371 | 0.06701 | 0.333646486 | 2.315872 | 2.07E-06 | hypermethylated |
| cg11390378 | 0.08062 | 0.401364865 | 2.315705 | 1.02E-05 | hypermethylated |
| cg11723848 | 0.04614 | 0.229589189 | 2.314965 | 0.000124 | hypermethylated |
| cg14002960 | 0.07    | 0.348277838 | 2.314812 | 6.57E-06 | hypermethylated |
| cg00711088 | 0.05372 | 0.267154595 | 2.314144 | 1.44E-05 | hypermethylated |
| cg01369750 | 0.05433 | 0.270131351 | 2.31384  | 8.71E-06 | hypermethylated |
| cg11183632 | 0.0562  | 0.279377297 | 2.313573 | 2.89E-05 | hypermethylated |
| cg14238959 | 0.06708 | 0.333425946 | 2.313412 | 2.74E-05 | hypermethylated |
| cg20930366 | 0.03627 | 0.180199459 | 2.312746 | 2.04E-05 | hypermethylated |
| cg20482698 | 0.07626 | 0.378875676 | 2.312726 | 1.75E-05 | hypermethylated |
| cg23645199 | 0.04852 | 0.241055676 | 2.312715 | 6.86E-05 | hypermethylated |
| cg23353952 | 0.06525 | 0.324159459 | 2.312654 | 1.93E-06 | hypermethylated |
| cg13347257 | 0.06428 | 0.319170811 | 2.311887 | 1.80E-05 | hypermethylated |
| cg07860213 | 0.09462 | 0.469665946 | 2.311418 | 2.23E-06 | hypermethylated |
| cg15063116 | 0.04897 | 0.24304     | 2.311224 | 2.51E-05 | hypermethylated |
| cg06008912 | 0.05901 | 0.292823784 | 2.311001 | 0.001587 | hypermethylated |
| cg24843380 | 0.06766 | 0.335568649 | 2.310233 | 2.18E-05 | hypermethylated |
| cg18134312 | 0.04337 | 0.215070811 | 2.310042 | 2.30E-05 | hypermethylated |
| cg22982368 | 0.04928 | 0.244170811 | 2.308817 | 1.23E-05 | hypermethylated |
| cg22717014 | 0.06614 | 0.32768973  | 2.308736 | 4.36E-06 | hypermethylated |
| cg11942956 | 0.05847 | 0.289608108 | 2.308333 | 2.32E-05 | hypermethylated |
| cg26476852 | 0.08225 | 0.407273514 | 2.30791  | 1.75E-06 | hypermethylated |
| cg24643706 | 0.05489 | 0.271647027 | 2.307118 | 6.05E-06 | hypermethylated |
| cg05241461 | 0.07251 | 0.358698919 | 2.306522 | 5.73E-06 | hypermethylated |
| cg22747746 | 0.07116 | 0.351969189 | 2.306311 | 9.07E-06 | hypermethylated |
| cg09090724 | 0.05124 | 0.253435135 | 2.306274 | 1.99E-05 | hypermethylated |
| cg20743280 | 0.04956 | 0.245092973 | 2.306081 | 3.11E-05 | hypermethylated |
| cg19819285 | 0.04257 | 0.210478378 | 2.305763 | 6.30E-06 | hypermethylated |
| cg00866976 | 0.05315 | 0.26272     | 2.305384 | 1.54E-05 | hypermethylated |
| cg00532157 | 0.06301 | 0.311395135 | 2.305094 | 4.80E-06 | hypermethylated |
| cg23536473 | 0.08658 | 0.427776757 | 2.304752 | 4.86E-06 | hypermethylated |
| cg11267829 | 0.04942 | 0.244172973 | 2.304737 | 0.000749 | hypermethylated |
| cg03445694 | 0.04103 | 0.202690811 | 2.30453  | 4.86E-06 | hypermethylated |
| cg21200539 | 0.05736 | 0.283331892 | 2.304376 | 5.14E-06 | hypermethylated |
| cg25825488 | 0.05812 | 0.287083243 | 2.304363 | 1.18E-05 | hypermethylated |
| cg26205771 | 0.06783 | 0.335013514 | 2.304224 | 1.66E-05 | hypermethylated |
| cg04597433 | 0.08478 | 0.418729189 | 2.304222 | 2.05E-06 | hypermethylated |
| cg25951981 | 0.04441 | 0.219302162 | 2.303964 | 1.08E-05 | hypermethylated |

|            |         |             |          |          |                 |
|------------|---------|-------------|----------|----------|-----------------|
| cg12396325 | 0.07287 | 0.359627568 | 2.303107 | 2.07E-05 | hypermethylated |
| cg20386316 | 0.06183 | 0.304952973 | 2.302208 | 1.24E-06 | hypermethylated |
| cg22757824 | 0.07347 | 0.362357297 | 2.302186 | 8.15E-06 | hypermethylated |
| cg04954559 | 0.05615 | 0.276844865 | 2.30172  | 1.80E-05 | hypermethylated |
| cg00287312 | 0.07425 | 0.366068108 | 2.301649 | 1.15E-05 | hypermethylated |
| cg23207990 | 0.06851 | 0.337762703 | 2.301624 | 1.73E-05 | hypermethylated |
| cg00674365 | 0.0821  | 0.404755135 | 2.301595 | 2.04E-05 | hypermethylated |
| cg07034660 | 0.05646 | 0.278314054 | 2.301413 | 3.07E-05 | hypermethylated |
| cg10527010 | 0.06984 | 0.344160541 | 2.300956 | 4.01E-06 | hypermethylated |
| cg23290344 | 0.08689 | 0.427754595 | 2.299521 | 4.48E-06 | hypermethylated |
| cg11469061 | 0.04515 | 0.222264865 | 2.299482 | 3.08E-06 | hypermethylated |
| cg09780241 | 0.06976 | 0.34341027  | 2.299461 | 1.89E-05 | hypermethylated |
| cg11381539 | 0.06712 | 0.330394595 | 2.299375 | 4.30E-06 | hypermethylated |
| cg14930075 | 0.06364 | 0.313155135 | 2.298872 | 0.000145 | hypermethylated |
| cg09234518 | 0.04592 | 0.225787027 | 2.297768 | 1.08E-05 | hypermethylated |
| cg19909787 | 0.0613  | 0.301336757 | 2.297418 | 5.19E-05 | hypermethylated |
| cg19099050 | 0.06661 | 0.327382162 | 2.297165 | 5.73E-06 | hypermethylated |
| cg17349389 | 0.05677 | 0.278771892 | 2.295884 | 2.18E-05 | hypermethylated |
| cg02246645 | 0.04578 | 0.22476     | 2.295596 | 1.62E-05 | hypermethylated |
| cg26963797 | 0.06612 | 0.324599459 | 2.295502 | 1.58E-05 | hypermethylated |
| cg21426003 | 0.07101 | 0.348546486 | 2.295257 | 1.99E-05 | hypermethylated |
| cg08276289 | 0.06205 | 0.304491892 | 2.294901 | 2.92E-05 | hypermethylated |
| cg04098866 | 0.05524 | 0.271024865 | 2.29464  | 5.35E-06 | hypermethylated |
| cg05941108 | 0.0727  | 0.356588649 | 2.294234 | 6.20E-07 | hypermethylated |
| cg17466857 | 0.06125 | 0.300427027 | 2.294233 | 4.58E-05 | hypermethylated |
| cg12850078 | 0.04649 | 0.227996216 | 2.294018 | 0.000161 | hypermethylated |
| cg23699196 | 0.05648 | 0.276916216 | 2.293638 | 1.04E-05 | hypermethylated |
| cg17294725 | 0.06452 | 0.316259459 | 2.29329  | 6.05E-06 | hypermethylated |
| cg18143243 | 0.06246 | 0.306084324 | 2.292925 | 0.000126 | hypermethylated |
| cg10387551 | 0.06164 | 0.302011892 | 2.292667 | 1.44E-05 | hypermethylated |
| cg06132028 | 0.0513  | 0.251182162 | 2.291703 | 1.50E-05 | hypermethylated |
| cg12668482 | 0.0482  | 0.235918378 | 2.291183 | 1.46E-05 | hypermethylated |
| cg06113354 | 0.05488 | 0.268409189 | 2.290082 | 2.42E-06 | hypermethylated |
| cg15617814 | 0.09488 | 0.463971351 | 2.28986  | 9.31E-06 | hypermethylated |
| cg09321400 | 0.08217 | 0.401555135 | 2.288914 | 3.30E-06 | hypermethylated |
| cg12995800 | 0.05833 | 0.285039459 | 2.288852 | 4.58E-05 | hypermethylated |
| cg10364040 | 0.08821 | 0.430895135 | 2.288323 | 5.89E-06 | hypermethylated |
| cg18249634 | 0.07637 | 0.373044865 | 2.288271 | 2.99E-06 | hypermethylated |
| cg10821845 | 0.06499 | 0.317283243 | 2.287482 | 3.76E-05 | hypermethylated |
| cg02071005 | 0.05399 | 0.26345027  | 2.286767 | 2.71E-05 | hypermethylated |
| cg22557662 | 0.07162 | 0.349379459 | 2.28636  | 1.25E-05 | hypermethylated |
| cg20884887 | 0.09269 | 0.452129189 | 2.286249 | 3.90E-06 | hypermethylated |
| cg05525743 | 0.05153 | 0.251250811 | 2.285644 | 6.93E-06 | hypermethylated |
| cg26650638 | 0.08986 | 0.438127568 | 2.2856   | 1.09E-05 | hypermethylated |
| cg14304817 | 0.05345 | 0.260573514 | 2.285429 | 3.62E-05 | hypermethylated |
| cg23952663 | 0.04929 | 0.240190811 | 2.284814 | 2.87E-06 | hypermethylated |
| cg07455757 | 0.06048 | 0.294701081 | 2.284722 | 7.29E-05 | hypermethylated |
| cg18325439 | 0.04459 | 0.21716973  | 2.284031 | 6.01E-05 | hypermethylated |
| cg26595278 | 0.07468 | 0.363509189 | 2.283198 | 9.07E-06 | hypermethylated |
| cg02700891 | 0.07085 | 0.344820541 | 2.283006 | 1.28E-05 | hypermethylated |
| cg14511946 | 0.05779 | 0.281246486 | 2.282943 | 5.00E-05 | hypermethylated |
| cg04970570 | 0.07494 | 0.364533514 | 2.282244 | 5.00E-06 | hypermethylated |
| cg17303756 | 0.05046 | 0.245408649 | 2.281974 | 1.94E-05 | hypermethylated |
| cg07204550 | 0.0483  | 0.234807027 | 2.28138  | 1.84E-05 | hypermethylated |
| cg02653557 | 0.06207 | 0.301742162 | 2.281348 | 1.62E-05 | hypermethylated |
| cg18255353 | 0.06884 | 0.334568649 | 2.280983 | 4.36E-06 | hypermethylated |
| cg00266286 | 0.04203 | 0.204248649 | 2.280835 | 4.30E-06 | hypermethylated |
| cg07015911 | 0.06352 | 0.308471351 | 2.279854 | 0.000283 | hypermethylated |

|            |         |             |          |          |                 |
|------------|---------|-------------|----------|----------|-----------------|
| cg02332982 | 0.06623 | 0.321601081 | 2.279715 | 1.39E-05 | hypermethylated |
| cg19142026 | 0.08553 | 0.415245946 | 2.279464 | 3.59E-06 | hypermethylated |
| cg17322443 | 0.06123 | 0.297173514 | 2.278995 | 7.83E-06 | hypermethylated |
| cg11855516 | 0.03955 | 0.191907568 | 2.278662 | 0.000122 | hypermethylated |
| cg22711111 | 0.07932 | 0.384803243 | 2.278364 | 9.11E-07 | hypermethylated |
| cg24884703 | 0.0578  | 0.280208649 | 2.27736  | 6.66E-06 | hypermethylated |
| cg07149609 | 0.08523 | 0.413123784 | 2.277141 | 2.29E-06 | hypermethylated |
| cg23500059 | 0.05288 | 0.256263243 | 2.276832 | 3.67E-05 | hypermethylated |
| cg06913501 | 0.0538  | 0.260623784 | 2.276291 | 1.75E-05 | hypermethylated |
| cg12521353 | 0.06418 | 0.310798919 | 2.275786 | 0.000287 | hypermethylated |
| cg24556441 | 0.08441 | 0.408525405 | 2.27494  | 6.57E-06 | hypermethylated |
| cg00128702 | 0.04761 | 0.230358919 | 2.274547 | 1.80E-06 | hypermethylated |
| cg05870739 | 0.05886 | 0.284781622 | 2.274497 | 5.00E-06 | hypermethylated |
| cg15797110 | 0.06437 | 0.31142973  | 2.274446 | 1.82E-06 | hypermethylated |
| cg02758612 | 0.07499 | 0.362503243 | 2.273224 | 1.01E-05 | hypermethylated |
| cg07907386 | 0.06884 | 0.332684865 | 2.272837 | 1.49E-06 | hypermethylated |
| cg26813646 | 0.07173 | 0.346537838 | 2.272364 | 3.39E-06 | hypermethylated |
| cg19030579 | 0.05823 | 0.281299459 | 2.272272 | 3.40E-07 | hypermethylated |
| cg21200408 | 0.07603 | 0.367041081 | 2.271301 | 4.80E-06 | hypermethylated |
| cg08832906 | 0.0794  | 0.383234595 | 2.271017 | 2.67E-05 | hypermethylated |
| cg22310279 | 0.04681 | 0.225890811 | 2.270737 | 8.60E-06 | hypermethylated |
| cg17030173 | 0.07761 | 0.374482162 | 2.270583 | 4.36E-06 | hypermethylated |
| cg08431563 | 0.07224 | 0.348288649 | 2.269414 | 2.04E-05 | hypermethylated |
| cg17495912 | 0.10792 | 0.520276757 | 2.269317 | 6.75E-06 | hypermethylated |
| cg04963514 | 0.05468 | 0.263575676 | 2.269132 | 0.00035  | hypermethylated |
| cg17934871 | 0.07732 | 0.372675676 | 2.269007 | 5.43E-06 | hypermethylated |
| cg14752336 | 0.04355 | 0.209892973 | 2.268909 | 4.86E-06 | hypermethylated |
| cg03349020 | 0.05529 | 0.266422162 | 2.268624 | 9.60E-05 | hypermethylated |
| cg13012916 | 0.07639 | 0.367832973 | 2.267595 | 3.79E-06 | hypermethylated |
| cg23806894 | 0.08232 | 0.396372432 | 2.267542 | 4.60E-06 | hypermethylated |
| cg10453420 | 0.05621 | 0.270542162 | 2.266955 | 2.74E-05 | hypermethylated |
| cg00765783 | 0.08153 | 0.392157297 | 2.26603  | 6.57E-06 | hypermethylated |
| cg07115542 | 0.06468 | 0.311061081 | 2.265806 | 0.000232 | hypermethylated |
| cg05724110 | 0.05408 | 0.260022703 | 2.265471 | 7.93E-06 | hypermethylated |
| cg25720804 | 0.08773 | 0.421798919 | 2.265413 | 1.63E-06 | hypermethylated |
| cg01477985 | 0.08029 | 0.385998378 | 2.265303 | 1.39E-05 | hypermethylated |
| cg09729848 | 0.05982 | 0.287507568 | 2.2649   | 7.52E-06 | hypermethylated |
| cg03774803 | 0.07063 | 0.339433514 | 2.264776 | 9.82E-06 | hypermethylated |
| cg26947626 | 0.08205 | 0.394298378 | 2.264713 | 2.87E-06 | hypermethylated |
| cg25403721 | 0.0751  | 0.360774054 | 2.264211 | 3.49E-06 | hypermethylated |
| cg02801786 | 0.08235 | 0.395461622 | 2.263697 | 7.83E-06 | hypermethylated |
| cg08249988 | 0.07649 | 0.36729027  | 2.263578 | 3.57E-05 | hypermethylated |
| cg02742906 | 0.07532 | 0.361484324 | 2.262828 | 6.39E-06 | hypermethylated |
| cg08560111 | 0.05054 | 0.242411351 | 2.26196  | 7.52E-06 | hypermethylated |
| cg27301032 | 0.05121 | 0.245615676 | 2.261905 | 6.93E-06 | hypermethylated |
| cg24073466 | 0.04777 | 0.229005946 | 2.261208 | 2.56E-06 | hypermethylated |
| cg15811515 | 0.11908 | 0.570521622 | 2.26035  | 2.49E-06 | hypermethylated |
| cg12127472 | 0.0807  | 0.386569189 | 2.260086 | 8.60E-06 | hypermethylated |
| cg23736843 | 0.07525 | 0.360393514 | 2.25981  | 2.51E-05 | hypermethylated |
| cg00090936 | 0.04632 | 0.221827027 | 2.259728 | 6.93E-06 | hypermethylated |
| cg19275261 | 0.05153 | 0.246603784 | 2.25871  | 0.000193 | hypermethylated |
| cg09656848 | 0.07226 | 0.345692432 | 2.25822  | 0.000764 | hypermethylated |
| cg21532325 | 0.06027 | 0.28832973  | 2.258208 | 0.000327 | hypermethylated |
| cg13063344 | 0.06388 | 0.305521622 | 2.257838 | 2.21E-05 | hypermethylated |
| cg07124687 | 0.08532 | 0.407995135 | 2.257596 | 6.08E-05 | hypermethylated |
| cg17689721 | 0.05908 | 0.282484865 | 2.257432 | 8.60E-06 | hypermethylated |
| cg13031171 | 0.05244 | 0.250651351 | 2.256942 | 2.74E-05 | hypermethylated |
| cg16055026 | 0.05361 | 0.256198378 | 2.256687 | 1.97E-05 | hypermethylated |

|            |         |             |          |          |                 |
|------------|---------|-------------|----------|----------|-----------------|
| cg14885748 | 0.08039 | 0.384037838 | 2.256161 | 3.21E-06 | hypermethylated |
| cg18180569 | 0.0601  | 0.287070811 | 2.25597  | 2.39E-05 | hypermethylated |
| cg21135135 | 0.09035 | 0.431431351 | 2.255535 | 2.29E-06 | hypermethylated |
| cg00661970 | 0.08136 | 0.388343243 | 2.254941 | 3.21E-06 | hypermethylated |
| cg07180307 | 0.07903 | 0.377153514 | 2.25468  | 1.08E-05 | hypermethylated |
| cg12926938 | 0.06362 | 0.303609189 | 2.254663 | 0.000335 | hypermethylated |
| cg22802813 | 0.06204 | 0.295863784 | 2.253663 | 1.46E-05 | hypermethylated |
| cg16690757 | 0.05734 | 0.273421081 | 2.253511 | 5.00E-06 | hypermethylated |
| cg05500840 | 0.07224 | 0.344336216 | 2.252948 | 1.99E-06 | hypermethylated |
| cg21159778 | 0.04832 | 0.230290811 | 2.252764 | 5.38E-05 | hypermethylated |
| cg10811045 | 0.08881 | 0.423235676 | 2.252667 | 4.24E-06 | hypermethylated |
| cg22043168 | 0.0671  | 0.319631892 | 2.252027 | 2.15E-05 | hypermethylated |
| cg13473356 | 0.06396 | 0.304558378 | 2.251477 | 2.13E-05 | hypermethylated |
| cg11224582 | 0.09089 | 0.432696757 | 2.251163 | 1.75E-05 | hypermethylated |
| cg14817655 | 0.07086 | 0.337332973 | 2.25113  | 8.15E-06 | hypermethylated |
| cg13023870 | 0.08268 | 0.393405946 | 2.250408 | 2.79E-06 | hypermethylated |
| cg27347269 | 0.05504 | 0.261873514 | 2.250318 | 9.07E-06 | hypermethylated |
| cg24524352 | 0.05864 | 0.278982703 | 2.250219 | 8.03E-05 | hypermethylated |
| cg04360049 | 0.0533  | 0.253563243 | 2.250138 | 9.60E-05 | hypermethylated |
| cg01947130 | 0.05667 | 0.26949027  | 2.249576 | 4.26E-05 | hypermethylated |
| cg09194159 | 0.06299 | 0.299496757 | 2.249346 | 0.000159 | hypermethylated |
| cg08958294 | 0.07429 | 0.353080541 | 2.248757 | 1.30E-05 | hypermethylated |
| cg22869726 | 0.09284 | 0.441014595 | 2.248008 | 1.37E-06 | hypermethylated |
| cg13874817 | 0.05688 | 0.270096757 | 2.247483 | 3.07E-05 | hypermethylated |
| cg10723962 | 0.04481 | 0.21278     | 2.24747  | 0.000145 | hypermethylated |
| cg27423760 | 0.08648 | 0.410616757 | 2.247354 | 1.64E-05 | hypermethylated |
| cg12563644 | 0.05315 | 0.252336757 | 2.247209 | 0.000857 | hypermethylated |
| cg20438306 | 0.0552  | 0.262001081 | 2.246833 | 3.69E-06 | hypermethylated |
| cg09683350 | 0.06943 | 0.329522703 | 2.246747 | 1.25E-05 | hypermethylated |
| cg25984671 | 0.08598 | 0.408041081 | 2.246641 | 4.48E-06 | hypermethylated |
| cg14096889 | 0.0566  | 0.268562703 | 2.246385 | 1.15E-05 | hypermethylated |
| cg23650423 | 0.06211 | 0.294692432 | 2.246313 | 4.30E-06 | hypermethylated |
| cg15736169 | 0.05663 | 0.268585946 | 2.245745 | 1.62E-05 | hypermethylated |
| cg07963234 | 0.08743 | 0.414424865 | 2.24491  | 3.69E-06 | hypermethylated |
| cg12682684 | 0.07111 | 0.337063243 | 2.244895 | 2.57E-05 | hypermethylated |
| cg09124223 | 0.07188 | 0.340557838 | 2.244238 | 5.50E-06 | hypermethylated |
| cg23205387 | 0.06808 | 0.322475676 | 2.243887 | 1.18E-05 | hypermethylated |
| cg05732832 | 0.06514 | 0.308511892 | 2.24371  | 1.88E-06 | hypermethylated |
| cg20585530 | 0.08861 | 0.419619459 | 2.24354  | 3.12E-06 | hypermethylated |
| cg23554956 | 0.05476 | 0.259242703 | 2.243109 | 1.84E-05 | hypermethylated |
| cg19472098 | 0.06887 | 0.325810811 | 2.242087 | 2.89E-05 | hypermethylated |
| cg09227138 | 0.04044 | 0.191311351 | 2.242068 | 0.000102 | hypermethylated |
| cg13575339 | 0.05036 | 0.238218919 | 2.241938 | 8.15E-06 | hypermethylated |
| cg20129213 | 0.08758 | 0.414102162 | 2.241313 | 0.000101 | hypermethylated |
| cg02076785 | 0.05338 | 0.252231892 | 2.240379 | 2.32E-05 | hypermethylated |
| cg06506966 | 0.06493 | 0.306764324 | 2.240174 | 8.73E-05 | hypermethylated |
| cg10034890 | 0.06678 | 0.315360541 | 2.239514 | 3.00E-05 | hypermethylated |
| cg22674699 | 0.11636 | 0.549412973 | 2.239296 | 3.79E-06 | hypermethylated |
| cg14473102 | 0.11216 | 0.529562162 | 2.239242 | 1.63E-06 | hypermethylated |
| cg05860723 | 0.06779 | 0.319663784 | 2.237411 | 3.90E-06 | hypermethylated |
| cg03638172 | 0.06559 | 0.309098919 | 2.236521 | 2.45E-05 | hypermethylated |
| cg24569447 | 0.07208 | 0.339608649 | 2.236202 | 6.84E-06 | hypermethylated |
| cg17583413 | 0.04742 | 0.223411892 | 2.236138 | 1.15E-05 | hypermethylated |
| cg14625113 | 0.07298 | 0.343768108 | 2.235863 | 3.19E-05 | hypermethylated |
| cg02900995 | 0.05799 | 0.273137297 | 2.23575  | 2.07E-05 | hypermethylated |
| cg06401021 | 0.08118 | 0.382224865 | 2.235225 | 5.12E-05 | hypermethylated |
| cg03078363 | 0.05725 | 0.269518378 | 2.235036 | 3.53E-05 | hypermethylated |
| cg06003986 | 0.05597 | 0.263301081 | 2.233988 | 1.04E-05 | hypermethylated |

|            |         |             |          |          |                 |
|------------|---------|-------------|----------|----------|-----------------|
| cg26162582 | 0.07228 | 0.340014595 | 2.233928 | 1.18E-05 | hypermethylated |
| cg08858649 | 0.10011 | 0.470872432 | 2.23375  | 1.02E-06 | hypermethylated |
| cg14644752 | 0.0577  | 0.271388108 | 2.233714 | 7.12E-05 | hypermethylated |
| cg03900143 | 0.09412 | 0.442205946 | 2.232145 | 1.88E-06 | hypermethylated |
| cg14094983 | 0.06339 | 0.29746973  | 2.230416 | 1.25E-05 | hypermethylated |
| cg05404010 | 0.05376 | 0.252257838 | 2.230294 | 1.63E-06 | hypermethylated |
| cg00334063 | 0.1085  | 0.509108108 | 2.230277 | 1.93E-06 | hypermethylated |
| cg04290346 | 0.08585 | 0.402807568 | 2.230201 | 6.05E-06 | hypermethylated |
| cg02828023 | 0.06429 | 0.301585405 | 2.2299   | 4.64E-05 | hypermethylated |
| cg11178863 | 0.09053 | 0.424508649 | 2.229326 | 6.05E-06 | hypermethylated |
| cg21718267 | 0.06421 | 0.301017838 | 2.228979 | 1.75E-05 | hypermethylated |
| cg06528306 | 0.09526 | 0.446497838 | 2.228711 | 1.25E-05 | hypermethylated |
| cg12271981 | 0.08055 | 0.377537838 | 2.228665 | 1.82E-06 | hypermethylated |
| cg00619126 | 0.06807 | 0.318961622 | 2.228292 | 2.71E-06 | hypermethylated |
| cg10671668 | 0.08165 | 0.38249027  | 2.227898 | 4.48E-06 | hypermethylated |
| cg19870512 | 0.09275 | 0.434264865 | 2.227156 | 5.89E-06 | hypermethylated |
| cg06651311 | 0.06614 | 0.309524865 | 2.22646  | 3.00E-05 | hypermethylated |
| cg18803104 | 0.08854 | 0.41422     | 2.225996 | 6.38E-05 | hypermethylated |
| cg22574825 | 0.06602 | 0.308823784 | 2.225809 | 5.72E-05 | hypermethylated |
| cg19384289 | 0.08288 | 0.387662703 | 2.225706 | 5.00E-06 | hypermethylated |
| cg04812556 | 0.07868 | 0.367972432 | 2.225529 | 9.49E-05 | hypermethylated |
| cg19206040 | 0.07356 | 0.343980541 | 2.225334 | 2.57E-05 | hypermethylated |
| cg24368848 | 0.07879 | 0.368355135 | 2.225013 | 4.12E-06 | hypermethylated |
| cg22604316 | 0.08007 | 0.374335135 | 2.224997 | 6.22E-06 | hypermethylated |
| cg17393267 | 0.0553  | 0.258488649 | 2.22475  | 0.000115 | hypermethylated |
| cg23715830 | 0.08846 | 0.413448108 | 2.224609 | 7.22E-06 | hypermethylated |
| cg11539780 | 0.06822 | 0.318758378 | 2.224197 | 3.90E-05 | hypermethylated |
| cg12456714 | 0.0864  | 0.403422703 | 2.223189 | 5.35E-06 | hypermethylated |
| cg19024969 | 0.05999 | 0.28009027  | 2.223098 | 3.62E-05 | hypermethylated |
| cg23474501 | 0.08592 | 0.401128108 | 2.222997 | 1.09E-05 | hypermethylated |
| cg20395967 | 0.0874  | 0.407968649 | 2.222753 | 5.89E-06 | hypermethylated |
| cg13589108 | 0.06604 | 0.30815027  | 2.222222 | 1.84E-05 | hypermethylated |
| cg26541867 | 0.06369 | 0.297152973 | 2.222067 | 7.03E-05 | hypermethylated |
| cg16801887 | 0.07509 | 0.350212973 | 2.22154  | 1.89E-05 | hypermethylated |
| cg14630357 | 0.04759 | 0.221936757 | 2.221418 | 3.53E-05 | hypermethylated |
| cg18921771 | 0.08201 | 0.382452432 | 2.221409 | 1.18E-06 | hypermethylated |
| cg06389697 | 0.06182 | 0.288251351 | 2.221182 | 1.54E-05 | hypermethylated |
| cg15617155 | 0.07506 | 0.34994973  | 2.221031 | 5.65E-06 | hypermethylated |
| cg23358612 | 0.0833  | 0.388064865 | 2.219909 | 1.72E-06 | hypermethylated |
| cg11592503 | 0.07193 | 0.335065405 | 2.219777 | 6.23E-05 | hypermethylated |
| cg03011535 | 0.07421 | 0.345630811 | 2.219546 | 5.51E-05 | hypermethylated |
| cg05269218 | 0.07394 | 0.344152432 | 2.218621 | 7.72E-06 | hypermethylated |
| cg19423543 | 0.05109 | 0.237795135 | 2.218606 | 1.52E-05 | hypermethylated |
| cg25088758 | 0.05527 | 0.257225946 | 2.218468 | 4.64E-05 | hypermethylated |
| cg10615842 | 0.0674  | 0.313457297 | 2.217448 | 9.94E-07 | hypermethylated |
| cg21684012 | 0.0577  | 0.268322162 | 2.217323 | 3.67E-05 | hypermethylated |
| cg16654801 | 0.05092 | 0.236563243 | 2.215922 | 9.96E-06 | hypermethylated |
| cg11064034 | 0.06285 | 0.291952973 | 2.215751 | 3.90E-06 | hypermethylated |
| cg05488770 | 0.07438 | 0.345451351 | 2.215496 | 1.17E-05 | hypermethylated |
| cg18443359 | 0.07535 | 0.349856757 | 2.215085 | 4.12E-06 | hypermethylated |
| cg14428146 | 0.06817 | 0.31648973  | 2.21495  | 1.62E-05 | hypermethylated |
| cg00418216 | 0.09063 | 0.420636757 | 2.214514 | 5.81E-06 | hypermethylated |
| cg00910518 | 0.07408 | 0.343747027 | 2.214191 | 2.99E-06 | hypermethylated |
| cg07065111 | 0.08703 | 0.403821081 | 2.214132 | 1.29E-06 | hypermethylated |
| cg13826890 | 0.05304 | 0.246104865 | 2.21412  | 1.51E-06 | hypermethylated |
| cg05258261 | 0.06394 | 0.296678378 | 2.214109 | 1.84E-05 | hypermethylated |
| cg18118685 | 0.07176 | 0.332833514 | 2.213549 | 3.40E-05 | hypermethylated |
| cg10375890 | 0.06832 | 0.316591892 | 2.212244 | 0.000117 | hypermethylated |

|            |         |             |          |          |                 |
|------------|---------|-------------|----------|----------|-----------------|
| cg15396686 | 0.09453 | 0.438009189 | 2.212117 | 4.01E-06 | hypermethylated |
| cg23174932 | 0.0597  | 0.276611892 | 2.21206  | 2.57E-05 | hypermethylated |
| cg11108269 | 0.05958 | 0.276051351 | 2.212037 | 0.000174 | hypermethylated |
| cg05164933 | 0.07881 | 0.365102162 | 2.21185  | 1.18E-05 | hypermethylated |
| cg07995179 | 0.0647  | 0.299709189 | 2.211726 | 0.000152 | hypermethylated |
| cg12065366 | 0.05765 | 0.267022162 | 2.211567 | 0.000259 | hypermethylated |
| cg07014523 | 0.05325 | 0.246638378 | 2.211544 | 0.000245 | hypermethylated |
| cg15920654 | 0.06595 | 0.305329189 | 2.210921 | 6.05E-06 | hypermethylated |
| cg04974290 | 0.06686 | 0.309256757 | 2.20959  | 3.59E-06 | hypermethylated |
| cg26759954 | 0.05917 | 0.273669189 | 2.209495 | 8.04E-06 | hypermethylated |
| cg10116864 | 0.06159 | 0.28473027  | 2.208828 | 4.70E-05 | hypermethylated |
| cg01866955 | 0.04816 | 0.222581622 | 2.208427 | 1.09E-05 | hypermethylated |
| cg10789281 | 0.05615 | 0.259458378 | 2.208145 | 2.51E-05 | hypermethylated |
| cg01184975 | 0.08318 | 0.384346486 | 2.208099 | 1.44E-05 | hypermethylated |
| cg18035255 | 0.04253 | 0.196511892 | 2.208064 | 2.67E-05 | hypermethylated |
| cg05874561 | 0.06703 | 0.309709189 | 2.208035 | 4.07E-06 | hypermethylated |
| cg02387803 | 0.07511 | 0.347032432 | 2.207994 | 6.57E-06 | hypermethylated |
| cg12853633 | 0.05844 | 0.269896757 | 2.20738  | 1.31E-05 | hypermethylated |
| cg06399302 | 0.08529 | 0.393777297 | 2.206931 | 4.60E-06 | hypermethylated |
| cg00812438 | 0.08589 | 0.396543243 | 2.206916 | 6.75E-06 | hypermethylated |
| cg03927893 | 0.04944 | 0.22819027  | 2.206487 | 2.02E-05 | hypermethylated |
| cg16675507 | 0.09077 | 0.418808649 | 2.206004 | 7.93E-06 | hypermethylated |
| cg03217253 | 0.06481 | 0.299014054 | 2.205925 | 0.000193 | hypermethylated |
| cg22284043 | 0.05027 | 0.231858919 | 2.205478 | 0.000159 | hypermethylated |
| cg15543616 | 0.05011 | 0.231015676 | 2.20482  | 3.26E-06 | hypermethylated |
| cg24011260 | 0.06516 | 0.300397838 | 2.204816 | 2.21E-05 | hypermethylated |
| cg09175749 | 0.04916 | 0.226516216 | 2.204058 | 5.28E-06 | hypermethylated |
| cg02155398 | 0.0804  | 0.370433514 | 2.203947 | 1.39E-05 | hypermethylated |
| cg20422099 | 0.07009 | 0.322868108 | 2.203664 | 1.54E-05 | hypermethylated |
| cg10866298 | 0.06367 | 0.293231892 | 2.203356 | 8.15E-06 | hypermethylated |
| cg04072323 | 0.06462 | 0.29758     | 2.203225 | 8.83E-06 | hypermethylated |
| cg00343633 | 0.0761  | 0.350355135 | 2.20285  | 9.19E-06 | hypermethylated |
| cg11312896 | 0.07578 | 0.348732973 | 2.202234 | 2.87E-06 | hypermethylated |
| cg16288089 | 0.07746 | 0.356434595 | 2.202114 | 4.82E-05 | hypermethylated |
| cg04415798 | 0.0953  | 0.43821027  | 2.201075 | 4.36E-06 | hypermethylated |
| cg23827572 | 0.06568 | 0.301900541 | 2.200547 | 4.07E-06 | hypermethylated |
| cg04248446 | 0.05221 | 0.239976216 | 2.200493 | 7.03E-05 | hypermethylated |
| cg15603568 | 0.08397 | 0.385909189 | 2.200316 | 1.40E-05 | hypermethylated |
| cg04510788 | 0.06619 | 0.304113514 | 2.199925 | 1.17E-05 | hypermethylated |
| cg09851951 | 0.07737 | 0.355394054 | 2.199573 | 5.43E-06 | hypermethylated |
| cg07212778 | 0.05907 | 0.271215135 | 2.19894  | 5.79E-05 | hypermethylated |
| cg26019112 | 0.0694  | 0.318618919 | 2.198824 | 6.05E-06 | hypermethylated |
| cg05583608 | 0.05498 | 0.252381081 | 2.198625 | 4.58E-05 | hypermethylated |
| cg05230054 | 0.06175 | 0.283354054 | 2.198095 | 2.27E-05 | hypermethylated |
| cg12601945 | 0.06044 | 0.277301622 | 2.19788  | 3.40E-05 | hypermethylated |
| cg18789663 | 0.08025 | 0.368188108 | 2.19787  | 2.57E-05 | hypermethylated |
| cg05057720 | 0.10251 | 0.470278378 | 2.19775  | 1.31E-05 | hypermethylated |
| cg11260046 | 0.05678 | 0.260355676 | 2.197029 | 0.000667 | hypermethylated |
| cg12113984 | 0.06354 | 0.291192973 | 2.196239 | 4.48E-06 | hypermethylated |
| cg06496344 | 0.07582 | 0.347390811 | 2.195909 | 1.04E-05 | hypermethylated |
| cg06598836 | 0.09854 | 0.451354054 | 2.195478 | 9.57E-06 | hypermethylated |
| cg03679755 | 0.07352 | 0.336723243 | 2.195355 | 1.68E-05 | hypermethylated |
| cg14836602 | 0.09014 | 0.412817838 | 2.195266 | 1.77E-06 | hypermethylated |
| cg26836696 | 0.05604 | 0.256544324 | 2.194679 | 1.71E-05 | hypermethylated |
| cg16418810 | 0.06531 | 0.298954595 | 2.194551 | 0.000109 | hypermethylated |
| cg25307168 | 0.09176 | 0.419951892 | 2.194287 | 6.75E-06 | hypermethylated |
| cg10453719 | 0.08053 | 0.368524865 | 2.194164 | 6.93E-06 | hypermethylated |
| cg11907729 | 0.07466 | 0.341626486 | 2.194012 | 2.61E-05 | hypermethylated |

|            |         |             |          |          |                 |
|------------|---------|-------------|----------|----------|-----------------|
| cg09556826 | 0.07484 | 0.342444865 | 2.19399  | 8.63E-05 | hypermethylated |
| cg26822097 | 0.06885 | 0.314933514 | 2.193519 | 5.14E-06 | hypermethylated |
| cg14699728 | 0.11378 | 0.520407027 | 2.193393 | 3.39E-06 | hypermethylated |
| cg13172637 | 0.05713 | 0.26128973  | 2.19333  | 1.33E-05 | hypermethylated |
| cg07568194 | 0.06023 | 0.275265405 | 2.192269 | 4.86E-06 | hypermethylated |
| cg14507868 | 0.07111 | 0.324974595 | 2.192203 | 3.53E-05 | hypermethylated |
| cg17222500 | 0.04871 | 0.222564324 | 2.191932 | 9.57E-06 | hypermethylated |
| cg16719466 | 0.05821 | 0.265714595 | 2.190539 | 3.12E-06 | hypermethylated |
| cg10652393 | 0.06899 | 0.314784865 | 2.189907 | 1.64E-05 | hypermethylated |
| cg26398467 | 0.06567 | 0.299547568 | 2.189479 | 8.84E-07 | hypermethylated |
| cg10304637 | 0.07325 | 0.334113514 | 2.189438 | 6.78E-07 | hypermethylated |
| cg04285275 | 0.06036 | 0.275297838 | 2.189329 | 1.09E-05 | hypermethylated |
| cg26831119 | 0.09776 | 0.44582973  | 2.189177 | 1.22E-06 | hypermethylated |
| cg06159352 | 0.08107 | 0.369644324 | 2.188898 | 1.94E-05 | hypermethylated |
| cg13060997 | 0.06829 | 0.311237297 | 2.188269 | 2.30E-05 | hypermethylated |
| cg21488538 | 0.07144 | 0.325593514 | 2.188268 | 2.24E-05 | hypermethylated |
| cg19754554 | 0.05491 | 0.250189189 | 2.187879 | 1.64E-05 | hypermethylated |
| cg08856946 | 0.06193 | 0.282094595 | 2.187469 | 5.93E-05 | hypermethylated |
| cg10143811 | 0.07578 | 0.345086486 | 2.187069 | 9.07E-06 | hypermethylated |
| cg07462540 | 0.06978 | 0.317694595 | 2.186755 | 6.70E-05 | hypermethylated |
| cg26983710 | 0.06663 | 0.303318378 | 2.186589 | 0.000102 | hypermethylated |
| cg26034516 | 0.05914 | 0.269210811 | 2.18653  | 9.38E-05 | hypermethylated |
| cg04525757 | 0.06163 | 0.280488649 | 2.186238 | 1.04E-05 | hypermethylated |
| cg26365534 | 0.05624 | 0.255937838 | 2.186125 | 3.44E-05 | hypermethylated |
| cg23036804 | 0.05056 | 0.230051892 | 2.185891 | 2.57E-06 | hypermethylated |
| cg07846220 | 0.08275 | 0.376334054 | 2.185183 | 1.99E-05 | hypermethylated |
| cg22784954 | 0.12471 | 0.567152432 | 2.185159 | 7.12E-06 | hypermethylated |
| cg26744375 | 0.05416 | 0.246305405 | 2.185149 | 0.000168 | hypermethylated |
| cg04249522 | 0.06012 | 0.273403784 | 2.185116 | 2.99E-06 | hypermethylated |
| cg02387326 | 0.0612  | 0.278315135 | 2.185116 | 1.04E-05 | hypermethylated |
| cg13539424 | 0.0622  | 0.282853514 | 2.185069 | 1.58E-05 | hypermethylated |
| cg10016380 | 0.05676 | 0.258062162 | 2.184772 | 1.21E-05 | hypermethylated |
| cg25020286 | 0.06809 | 0.309481081 | 2.184336 | 3.19E-05 | hypermethylated |
| cg06629130 | 0.06654 | 0.30243027  | 2.184309 | 9.31E-06 | hypermethylated |
| cg03929977 | 0.06414 | 0.291511892 | 2.184258 | 1.46E-05 | hypermethylated |
| cg12500879 | 0.08966 | 0.407467568 | 2.184149 | 1.58E-05 | hypermethylated |
| cg20667845 | 0.03133 | 0.142367568 | 2.184004 | 5.43E-06 | hypermethylated |
| cg02523640 | 0.08436 | 0.383289189 | 2.183802 | 4.01E-06 | hypermethylated |
| cg03205584 | 0.09021 | 0.409854054 | 2.183751 | 8.37E-06 | hypermethylated |
| cg13834844 | 0.05723 | 0.260013514 | 2.183743 | 7.12E-05 | hypermethylated |
| cg09142313 | 0.09614 | 0.436525946 | 2.182859 | 2.71E-06 | hypermethylated |
| cg24439256 | 0.05174 | 0.234911351 | 2.182764 | 4.10E-05 | hypermethylated |
| cg03807298 | 0.08088 | 0.367103243 | 2.182331 | 1.46E-05 | hypermethylated |
| cg18372607 | 0.09964 | 0.452172432 | 2.182076 | 2.36E-06 | hypermethylated |
| cg07682600 | 0.09651 | 0.437802162 | 2.181529 | 1.08E-05 | hypermethylated |
| cg15126975 | 0.06783 | 0.307547568 | 2.180814 | 0.000178 | hypermethylated |
| cg22510337 | 0.06766 | 0.306190811 | 2.178056 | 0.000245 | hypermethylated |
| cg24039697 | 0.08271 | 0.374228108 | 2.177784 | 7.32E-06 | hypermethylated |
| cg00515457 | 0.0761  | 0.344288649 | 2.17765  | 1.15E-05 | hypermethylated |
| cg11739758 | 0.06043 | 0.273387027 | 2.177608 | 4.54E-06 | hypermethylated |
| cg04865110 | 0.0653  | 0.295372973 | 2.177383 | 0.000193 | hypermethylated |
| cg08086720 | 0.08743 | 0.395421081 | 2.177189 | 2.42E-06 | hypermethylated |
| cg24846199 | 0.06893 | 0.311713514 | 2.177017 | 7.93E-05 | hypermethylated |
| cg22920300 | 0.06495 | 0.293643784 | 2.176666 | 3.30E-06 | hypermethylated |
| cg03120091 | 0.05495 | 0.24840973  | 2.17653  | 8.83E-06 | hypermethylated |
| cg05929882 | 0.05468 | 0.247174054 | 2.176442 | 3.12E-06 | hypermethylated |
| cg09316122 | 0.05714 | 0.258286486 | 2.176399 | 1.35E-05 | hypermethylated |
| cg06610484 | 0.05774 | 0.260961081 | 2.176192 | 8.48E-06 | hypermethylated |



|            |         |             |          |          |                 |
|------------|---------|-------------|----------|----------|-----------------|
| cg23420260 | 0.07877 | 0.356001081 | 2.176163 | 0.000306 | hypermethylated |
| cg07536910 | 0.09162 | 0.413907568 | 2.175574 | 2.64E-06 | hypermethylated |
| cg02647941 | 0.04823 | 0.217850811 | 2.175338 | 6.02E-07 | hypermethylated |
| cg09754845 | 0.08765 | 0.395686486 | 2.174532 | 1.94E-05 | hypermethylated |
| cg22152728 | 0.08125 | 0.366771892 | 2.174443 | 3.21E-06 | hypermethylated |
| cg15711902 | 0.07472 | 0.337283243 | 2.174394 | 5.97E-06 | hypermethylated |
| cg12612118 | 0.07209 | 0.325395135 | 2.174322 | 2.87E-06 | hypermethylated |
| cg05619892 | 0.07861 | 0.354688108 | 2.173766 | 2.45E-05 | hypermethylated |
| cg07792478 | 0.1087  | 0.490448649 | 2.17375  | 3.69E-06 | hypermethylated |
| cg18428516 | 0.05173 | 0.233316757 | 2.173217 | 6.48E-06 | hypermethylated |
| cg16015712 | 0.06571 | 0.296182703 | 2.172303 | 7.32E-06 | hypermethylated |
| cg27393010 | 0.10643 | 0.479668649 | 2.172133 | 4.12E-06 | hypermethylated |
| cg00904966 | 0.0851  | 0.383402703 | 2.171629 | 3.49E-05 | hypermethylated |
| cg08814405 | 0.07028 | 0.316623784 | 2.171584 | 5.58E-06 | hypermethylated |
| cg20058043 | 0.0661  | 0.297790811 | 2.171577 | 8.42E-05 | hypermethylated |
| cg18724565 | 0.05444 | 0.244975676 | 2.1699   | 1.28E-05 | hypermethylated |
| cg24632241 | 0.06357 | 0.285808649 | 2.168632 | 2.81E-05 | hypermethylated |
| cg24398479 | 0.08462 | 0.380421622 | 2.168529 | 1.06E-05 | hypermethylated |
| cg15778457 | 0.06376 | 0.286614054 | 2.168386 | 0.000256 | hypermethylated |
| cg25266629 | 0.07658 | 0.343828649 | 2.16665  | 2.35E-05 | hypermethylated |
| cg00177451 | 0.07964 | 0.357179459 | 2.165084 | 3.21E-06 | hypermethylated |
| cg16727201 | 0.06433 | 0.288506486 | 2.16504  | 2.89E-05 | hypermethylated |
| cg13163930 | 0.08426 | 0.377797297 | 2.164693 | 1.01E-06 | hypermethylated |
| cg07696699 | 0.06088 | 0.272965405 | 2.164678 | 1.66E-05 | hypermethylated |
| cg05534710 | 0.07067 | 0.31683027  | 2.16454  | 6.75E-06 | hypermethylated |
| cg26848718 | 0.0526  | 0.23580973  | 2.164489 | 5.28E-06 | hypermethylated |
| cg25640822 | 0.07266 | 0.325690811 | 2.16427  | 7.65E-05 | hypermethylated |
| cg27058486 | 0.08077 | 0.362035135 | 2.164238 | 3.07E-05 | hypermethylated |
| cg16317181 | 0.07075 | 0.317076216 | 2.164028 | 7.47E-05 | hypermethylated |
| cg06425919 | 0.08534 | 0.382352432 | 2.163609 | 1.58E-05 | hypermethylated |
| cg05437823 | 0.06101 | 0.273208649 | 2.162886 | 1.46E-05 | hypermethylated |
| cg14835443 | 0.0605  | 0.27083027  | 2.162382 | 1.84E-05 | hypermethylated |
| cg07215504 | 0.04723 | 0.211411351 | 2.162277 | 0.000157 | hypermethylated |
| cg24060451 | 0.06186 | 0.27688     | 2.162182 | 9.82E-06 | hypermethylated |
| cg27328797 | 0.0771  | 0.345016216 | 2.161861 | 6.15E-05 | hypermethylated |
| cg01085837 | 0.05783 | 0.258779459 | 2.161833 | 8.48E-06 | hypermethylated |
| cg07037371 | 0.04886 | 0.2186      | 2.161568 | 3.76E-05 | hypermethylated |
| cg15054725 | 0.08352 | 0.373651351 | 2.161499 | 1.09E-05 | hypermethylated |
| cg26894523 | 0.06745 | 0.301722703 | 2.161333 | 2.26E-06 | hypermethylated |
| cg09467508 | 0.06964 | 0.311494595 | 2.161219 | 1.17E-05 | hypermethylated |
| cg14985989 | 0.07208 | 0.322344324 | 2.160932 | 1.21E-05 | hypermethylated |
| cg12810096 | 0.06532 | 0.292108649 | 2.160908 | 2.64E-05 | hypermethylated |
| cg13703049 | 0.08198 | 0.366516216 | 2.160533 | 0.0017   | hypermethylated |
| cg26664161 | 0.06403 | 0.286252432 | 2.160468 | 2.57E-05 | hypermethylated |
| cg13252583 | 0.06447 | 0.288068108 | 2.15971  | 9.84E-05 | hypermethylated |
| cg26354128 | 0.0895  | 0.399872432 | 2.15958  | 2.04E-05 | hypermethylated |
| cg25360861 | 0.0667  | 0.298       | 2.159554 | 1.09E-05 | hypermethylated |
| cg09914742 | 0.05301 | 0.236764324 | 2.159115 | 3.39E-06 | hypermethylated |
| cg10416527 | 0.0726  | 0.323974595 | 2.157839 | 2.78E-05 | hypermethylated |
| cg00175709 | 0.05523 | 0.246338919 | 2.157121 | 7.12E-06 | hypermethylated |
| cg11171221 | 0.08554 | 0.381387027 | 2.156585 | 2.83E-06 | hypermethylated |
| cg06779449 | 0.08297 | 0.369868649 | 2.156351 | 8.15E-06 | hypermethylated |
| cg01995743 | 0.06947 | 0.309560541 | 2.15576  | 6.01E-05 | hypermethylated |
| cg21573200 | 0.08825 | 0.393190811 | 2.155561 | 1.88E-06 | hypermethylated |
| cg19127283 | 0.05884 | 0.262135135 | 2.155442 | 0.000374 | hypermethylated |
| cg10624122 | 0.06805 | 0.303112973 | 2.155189 | 1.15E-05 | hypermethylated |
| cg15215612 | 0.06299 | 0.280522162 | 2.15492  | 6.62E-05 | hypermethylated |
| cg12403137 | 0.05139 | 0.228809189 | 2.154585 | 7.65E-05 | hypermethylated |

|            |         |             |          |          |                 |
|------------|---------|-------------|----------|----------|-----------------|
| cg10038009 | 0.07172 | 0.319275135 | 2.154353 | 0.000172 | hypermethylated |
| cg14493920 | 0.05321 | 0.236835135 | 2.154114 | 0.000165 | hypermethylated |
| cg02463418 | 0.07192 | 0.319984865 | 2.153539 | 5.86E-05 | hypermethylated |
| cg21266559 | 0.06038 | 0.268635676 | 2.153508 | 3.85E-06 | hypermethylated |
| cg25306611 | 0.05542 | 0.246506486 | 2.153147 | 3.67E-05 | hypermethylated |
| cg06374079 | 0.05778 | 0.256918378 | 2.152668 | 1.46E-05 | hypermethylated |
| cg18276638 | 0.07548 | 0.335405946 | 2.151742 | 3.85E-05 | hypermethylated |
| cg02631468 | 0.06666 | 0.296180541 | 2.151584 | 3.15E-05 | hypermethylated |
| cg20061010 | 0.06312 | 0.280322162 | 2.150917 | 5.07E-06 | hypermethylated |
| cg05137358 | 0.08022 | 0.356138378 | 2.150404 | 1.01E-05 | hypermethylated |
| cg10931190 | 0.06852 | 0.30419027  | 2.150377 | 4.24E-06 | hypermethylated |
| cg21534423 | 0.06537 | 0.290205405 | 2.150374 | 4.64E-05 | hypermethylated |
| cg06374962 | 0.05636 | 0.25013027  | 2.149936 | 8.22E-05 | hypermethylated |
| cg14270857 | 0.05001 | 0.221935135 | 2.14985  | 4.82E-05 | hypermethylated |
| cg18322569 | 0.109   | 0.483592973 | 2.149465 | 2.57E-06 | hypermethylated |
| cg00028935 | 0.07696 | 0.341182703 | 2.148364 | 2.29E-06 | hypermethylated |
| cg24319902 | 0.07831 | 0.347117838 | 2.148157 | 8.60E-06 | hypermethylated |
| cg09736669 | 0.05089 | 0.225536216 | 2.147905 | 6.22E-06 | hypermethylated |
| cg22758454 | 0.0703  | 0.311395676 | 2.147152 | 2.21E-05 | hypermethylated |
| cg18952796 | 0.11779 | 0.521748649 | 2.147138 | 3.79E-06 | hypermethylated |
| cg00699993 | 0.05535 | 0.245109189 | 2.146769 | 5.72E-05 | hypermethylated |
| cg16966315 | 0.05861 | 0.259331892 | 2.145581 | 7.52E-06 | hypermethylated |
| cg01570424 | 0.07797 | 0.344958378 | 2.145431 | 1.82E-05 | hypermethylated |
| cg22337128 | 0.05994 | 0.265114595 | 2.145025 | 1.04E-05 | hypermethylated |
| cg22488797 | 0.09085 | 0.401791892 | 2.14489  | 2.26E-06 | hypermethylated |
| cg18408326 | 0.06572 | 0.290579459 | 2.144528 | 1.88E-06 | hypermethylated |
| cg02482218 | 0.07781 | 0.343994054 | 2.144356 | 1.33E-05 | hypermethylated |
| cg07428323 | 0.05269 | 0.232911892 | 2.144183 | 4.36E-05 | hypermethylated |
| cg25444386 | 0.09927 | 0.438735676 | 2.143922 | 4.73E-06 | hypermethylated |
| cg19079845 | 0.05592 | 0.247032432 | 2.143264 | 1.94E-05 | hypermethylated |
| cg15207742 | 0.0658  | 0.290637297 | 2.14306  | 0.000122 | hypermethylated |
| cg24150623 | 0.09541 | 0.421387568 | 2.142935 | 6.84E-06 | hypermethylated |
| cg00082664 | 0.07958 | 0.351364865 | 2.142492 | 1.28E-05 | hypermethylated |
| cg09073398 | 0.07242 | 0.319642162 | 2.141998 | 1.39E-05 | hypermethylated |
| cg09411719 | 0.05932 | 0.261791892 | 2.14183  | 3.96E-06 | hypermethylated |
| cg23509896 | 0.05422 | 0.239241081 | 2.141568 | 0.000262 | hypermethylated |
| cg11787346 | 0.06662 | 0.293952973 | 2.141558 | 4.88E-05 | hypermethylated |
| cg24680320 | 0.05197 | 0.229256216 | 2.14121  | 1.44E-05 | hypermethylated |
| cg18023096 | 0.06291 | 0.277305405 | 2.140114 | 6.05E-06 | hypermethylated |
| cg26371061 | 0.06056 | 0.266707027 | 2.138819 | 7.12E-06 | hypermethylated |
| cg12250896 | 0.07479 | 0.329263243 | 2.138324 | 0.000178 | hypermethylated |
| cg27120816 | 0.07194 | 0.316657297 | 2.138056 | 1.26E-05 | hypermethylated |
| cg02325540 | 0.05364 | 0.236058378 | 2.137763 | 1.51E-06 | hypermethylated |
| cg24624901 | 0.08556 | 0.376478919 | 2.137561 | 2.79E-06 | hypermethylated |
| cg10512745 | 0.08091 | 0.355921622 | 2.13717  | 0.000575 | hypermethylated |
| cg02378847 | 0.07206 | 0.316865946 | 2.136602 | 3.85E-05 | hypermethylated |
| cg18710462 | 0.04622 | 0.203212432 | 2.1364   | 3.12E-06 | hypermethylated |
| cg00549566 | 0.08608 | 0.378455135 | 2.136372 | 2.10E-05 | hypermethylated |
| cg18734428 | 0.0863  | 0.379005946 | 2.134788 | 2.95E-06 | hypermethylated |
| cg11597131 | 0.07318 | 0.321315676 | 2.13447  | 5.00E-06 | hypermethylated |
| cg19157034 | 0.07084 | 0.310863243 | 2.133644 | 5.45E-05 | hypermethylated |
| cg02179652 | 0.05924 | 0.259948649 | 2.133583 | 1.11E-05 | hypermethylated |
| cg26156448 | 0.05123 | 0.224707027 | 2.132984 | 1.06E-05 | hypermethylated |
| cg02503874 | 0.0604  | 0.264916216 | 2.132916 | 5.65E-06 | hypermethylated |
| cg24561661 | 0.0935  | 0.409985405 | 2.132534 | 1.45E-06 | hypermethylated |
| cg27621340 | 0.07362 | 0.322703243 | 2.132038 | 3.85E-06 | hypermethylated |
| cg25763393 | 0.07931 | 0.347358919 | 2.130852 | 5.28E-06 | hypermethylated |
| cg21859781 | 0.06534 | 0.28612973  | 2.130631 | 0.000445 | hypermethylated |

|            |         |             |          |          |                 |
|------------|---------|-------------|----------|----------|-----------------|
| cg07014673 | 0.10408 | 0.455628649 | 2.130166 | 5.89E-06 | hypermethylated |
| cg19961480 | 0.0509  | 0.222821622 | 2.130152 | 3.54E-06 | hypermethylated |
| cg23559689 | 0.08374 | 0.366531351 | 2.129948 | 1.50E-05 | hypermethylated |
| cg04756279 | 0.05624 | 0.246047568 | 2.129269 | 9.69E-06 | hypermethylated |
| cg03577655 | 0.07583 | 0.33175027  | 2.129257 | 2.27E-05 | hypermethylated |
| cg23484951 | 0.06164 | 0.269608108 | 2.128925 | 5.81E-06 | hypermethylated |
| cg06685968 | 0.07397 | 0.323471892 | 2.128628 | 1.99E-05 | hypermethylated |
| cg23161999 | 0.08305 | 0.363087568 | 2.128265 | 5.28E-06 | hypermethylated |
| cg08000065 | 0.06648 | 0.290416216 | 2.12713  | 2.89E-05 | hypermethylated |
| cg00812833 | 0.08277 | 0.361465946 | 2.12668  | 2.21E-05 | hypermethylated |
| cg26410450 | 0.06283 | 0.274335676 | 2.126417 | 0.000159 | hypermethylated |
| cg27037551 | 0.06312 | 0.275551892 | 2.126155 | 4.26E-05 | hypermethylated |
| cg05829782 | 0.06295 | 0.274808649 | 2.126149 | 1.09E-05 | hypermethylated |
| cg03382304 | 0.05828 | 0.254341622 | 2.125695 | 3.11E-05 | hypermethylated |
| cg12071888 | 0.08831 | 0.385297838 | 2.125325 | 1.33E-06 | hypermethylated |
| cg00129651 | 0.06397 | 0.279076216 | 2.125192 | 0.00094  | hypermethylated |
| cg13899017 | 0.08652 | 0.377224865 | 2.124319 | 5.58E-06 | hypermethylated |
| cg12111758 | 0.05065 | 0.220826486 | 2.124279 | 0.000104 | hypermethylated |
| cg00816224 | 0.07737 | 0.33731027  | 2.12423  | 3.44E-06 | hypermethylated |
| cg03854198 | 0.0371  | 0.161738378 | 2.124171 | 4.73E-06 | hypermethylated |
| cg04167903 | 0.06134 | 0.267412973 | 2.124169 | 9.72E-05 | hypermethylated |
| cg04344565 | 0.07572 | 0.330067568 | 2.124015 | 0.000212 | hypermethylated |
| cg06179765 | 0.05284 | 0.230294595 | 2.123778 | 1.15E-05 | hypermethylated |
| cg10454766 | 0.05704 | 0.248565405 | 2.12358  | 1.52E-05 | hypermethylated |
| cg26763877 | 0.07702 | 0.335629189 | 2.123563 | 5.97E-06 | hypermethylated |
| cg24041541 | 0.05174 | 0.225311892 | 2.122572 | 2.71E-05 | hypermethylated |
| cg08886973 | 0.06068 | 0.264154595 | 2.12209  | 2.04E-05 | hypermethylated |
| cg11885396 | 0.06931 | 0.301566486 | 2.121341 | 8.84E-05 | hypermethylated |
| cg22809871 | 0.08203 | 0.356896757 | 2.121283 | 2.48E-05 | hypermethylated |
| cg02388378 | 0.06977 | 0.3034      | 2.120542 | 2.39E-05 | hypermethylated |
| cg08612137 | 0.07086 | 0.308137838 | 2.120532 | 4.94E-05 | hypermethylated |
| cg24061141 | 0.078   | 0.339125946 | 2.120275 | 1.82E-05 | hypermethylated |
| cg11940285 | 0.10008 | 0.435103784 | 2.120206 | 2.95E-06 | hypermethylated |
| cg02760031 | 0.07729 | 0.336004865 | 2.120128 | 6.93E-06 | hypermethylated |
| cg01269620 | 0.07549 | 0.328063243 | 2.119617 | 2.15E-05 | hypermethylated |
| cg21389753 | 0.06118 | 0.265844324 | 2.11945  | 3.23E-05 | hypermethylated |
| cg21229570 | 0.07095 | 0.308139459 | 2.118709 | 1.66E-05 | hypermethylated |
| cg05417127 | 0.08323 | 0.361399459 | 2.118419 | 0.000152 | hypermethylated |
| cg04088969 | 0.06611 | 0.286922162 | 2.117719 | 5.31E-05 | hypermethylated |
| cg23528705 | 0.10606 | 0.460108649 | 2.117094 | 1.15E-06 | hypermethylated |
| cg19773855 | 0.0603  | 0.261583784 | 2.117043 | 3.30E-06 | hypermethylated |
| cg20634442 | 0.07411 | 0.321427027 | 2.116751 | 3.36E-05 | hypermethylated |
| cg13128937 | 0.05843 | 0.253341081 | 2.1163   | 3.62E-05 | hypermethylated |
| cg19115393 | 0.06879 | 0.298222703 | 2.116119 | 6.46E-05 | hypermethylated |
| cg08604097 | 0.07599 | 0.329402162 | 2.115969 | 1.09E-05 | hypermethylated |
| cg26718878 | 0.07722 | 0.334730811 | 2.115955 | 5.50E-06 | hypermethylated |
| cg06164660 | 0.05804 | 0.251544865 | 2.115696 | 1.12E-05 | hypermethylated |
| cg01578017 | 0.08679 | 0.375876757 | 2.114659 | 2.96E-05 | hypermethylated |
| cg26128079 | 0.05764 | 0.249562703 | 2.11426  | 1.05E-05 | hypermethylated |
| cg15382538 | 0.07484 | 0.323874595 | 2.113554 | 5.14E-06 | hypermethylated |
| cg24740218 | 0.04671 | 0.202052973 | 2.11293  | 3.67E-05 | hypermethylated |
| cg10530851 | 0.07665 | 0.331562703 | 2.112924 | 8.13E-05 | hypermethylated |
| cg02643054 | 0.07959 | 0.344271351 | 2.112887 | 1.77E-06 | hypermethylated |
| cg13570101 | 0.0595  | 0.257280541 | 2.112381 | 1.25E-05 | hypermethylated |
| cg12478381 | 0.07477 | 0.323073514 | 2.111331 | 1.42E-05 | hypermethylated |
| cg26371320 | 0.11234 | 0.485347568 | 2.111147 | 3.21E-06 | hypermethylated |
| cg13352750 | 0.08082 | 0.348864324 | 2.109882 | 3.76E-05 | hypermethylated |
| cg24390913 | 0.06485 | 0.279743784 | 2.108928 | 3.44E-06 | hypermethylated |

|            |         |             |          |          |                 |
|------------|---------|-------------|----------|----------|-----------------|
| cg00089798 | 0.07062 | 0.304581081 | 2.108678 | 1.66E-05 | hypermethylated |
| cg19806642 | 0.10441 | 0.450087027 | 2.107944 | 4.73E-06 | hypermethylated |
| cg21998983 | 0.06001 | 0.258684324 | 2.107918 | 1.33E-05 | hypermethylated |
| cg04819499 | 0.07724 | 0.332932973 | 2.107812 | 2.57E-05 | hypermethylated |
| cg13921352 | 0.06606 | 0.284718378 | 2.107687 | 4.05E-05 | hypermethylated |
| cg04402007 | 0.09894 | 0.426341622 | 2.107384 | 1.25E-05 | hypermethylated |
| cg24892510 | 0.05858 | 0.252263243 | 2.10645  | 4.36E-05 | hypermethylated |
| cg14871414 | 0.05773 | 0.248539459 | 2.106082 | 0.001063 | hypermethylated |
| cg15889913 | 0.05181 | 0.22301027  | 2.105808 | 1.44E-05 | hypermethylated |
| cg12338417 | 0.09767 | 0.420357297 | 2.105629 | 2.71E-06 | hypermethylated |
| cg08234308 | 0.07974 | 0.343103243 | 2.105267 | 0.000839 | hypermethylated |
| cg22638505 | 0.08772 | 0.377427568 | 2.105222 | 1.72E-06 | hypermethylated |
| cg07126525 | 0.08613 | 0.370415135 | 2.104555 | 2.29E-06 | hypermethylated |
| cg21540621 | 0.06889 | 0.296266486 | 2.104529 | 1.11E-05 | hypermethylated |
| cg21331821 | 0.06506 | 0.279741081 | 2.104249 | 3.30E-06 | hypermethylated |
| cg07401230 | 0.06813 | 0.292834595 | 2.103724 | 3.81E-05 | hypermethylated |
| cg22601348 | 0.07116 | 0.305758378 | 2.103254 | 7.83E-06 | hypermethylated |
| cg06577205 | 0.09954 | 0.427667027 | 2.10314  | 9.44E-06 | hypermethylated |
| cg10659805 | 0.10009 | 0.429990811 | 2.103008 | 9.11E-07 | hypermethylated |
| cg25640519 | 0.06424 | 0.275785405 | 2.102002 | 4.01E-06 | hypermethylated |
| cg16256390 | 0.07991 | 0.343052973 | 2.101983 | 1.26E-05 | hypermethylated |
| cg25915838 | 0.08238 | 0.353615676 | 2.101816 | 1.77E-05 | hypermethylated |
| cg23217097 | 0.06485 | 0.278362703 | 2.101787 | 9.19E-06 | hypermethylated |
| cg17438849 | 0.0732  | 0.314148108 | 2.101529 | 7.93E-06 | hypermethylated |
| cg27532847 | 0.05806 | 0.249030811 | 2.100708 | 4.00E-05 | hypermethylated |
| cg11523290 | 0.05504 | 0.235964865 | 2.10002  | 1.37E-05 | hypermethylated |
| cg15044957 | 0.08688 | 0.372302703 | 2.09938  | 1.68E-05 | hypermethylated |
| cg26708319 | 0.06587 | 0.282231351 | 2.099185 | 2.57E-06 | hypermethylated |
| cg12773394 | 0.07048 | 0.301837297 | 2.098485 | 1.49E-06 | hypermethylated |
| cg10541864 | 0.08159 | 0.349194054 | 2.097565 | 0.000116 | hypermethylated |
| cg03336086 | 0.06224 | 0.266331351 | 2.097308 | 1.63E-06 | hypermethylated |
| cg17320707 | 0.0918  | 0.392788649 | 2.097187 | 7.32E-06 | hypermethylated |
| cg24727311 | 0.07504 | 0.32106     | 2.097111 | 2.64E-05 | hypermethylated |
| cg08490115 | 0.08307 | 0.355273514 | 2.096531 | 1.87E-05 | hypermethylated |
| cg10741025 | 0.08798 | 0.376128108 | 2.095977 | 6.30E-06 | hypermethylated |
| cg01924880 | 0.04892 | 0.209064324 | 2.095451 | 2.61E-05 | hypermethylated |
| cg14251870 | 0.0632  | 0.269992432 | 2.094923 | 5.19E-05 | hypermethylated |
| cg14780632 | 0.11316 | 0.483253514 | 2.094416 | 9.82E-06 | hypermethylated |
| cg01408654 | 0.06765 | 0.28886973  | 2.094257 | 2.18E-05 | hypermethylated |
| cg26059468 | 0.09535 | 0.407091351 | 2.094048 | 1.94E-05 | hypermethylated |
| cg20311863 | 0.09072 | 0.387318919 | 2.094029 | 4.48E-06 | hypermethylated |
| cg15180867 | 0.04942 | 0.210979459 | 2.093936 | 3.04E-05 | hypermethylated |
| cg27154343 | 0.0833  | 0.355415676 | 2.093119 | 1.42E-05 | hypermethylated |
| cg19237294 | 0.06641 | 0.283319459 | 2.092957 | 1.01E-05 | hypermethylated |
| cg21627409 | 0.08876 | 0.378642162 | 2.092853 | 3.85E-06 | hypermethylated |
| cg00397479 | 0.09478 | 0.404322162 | 2.092851 | 4.48E-06 | hypermethylated |
| cg21001487 | 0.07542 | 0.321701622 | 2.092704 | 7.32E-06 | hypermethylated |
| cg05292954 | 0.06951 | 0.296272973 | 2.091635 | 2.78E-05 | hypermethylated |
| cg19084726 | 0.06375 | 0.271581622 | 2.090889 | 0.000104 | hypermethylated |
| cg22060073 | 0.05248 | 0.223441622 | 2.090058 | 9.07E-06 | hypermethylated |
| cg05415020 | 0.07617 | 0.32422973  | 2.089722 | 0.000469 | hypermethylated |
| cg01942962 | 0.07534 | 0.320694595 | 2.089712 | 1.25E-05 | hypermethylated |
| cg14200170 | 0.07759 | 0.330225946 | 2.089511 | 8.60E-06 | hypermethylated |
| cg24224020 | 0.07941 | 0.337964324 | 2.089478 | 1.39E-05 | hypermethylated |
| cg01836687 | 0.08678 | 0.369327027 | 2.089464 | 6.14E-06 | hypermethylated |
| cg14559259 | 0.08003 | 0.340583243 | 2.089395 | 3.59E-06 | hypermethylated |
| cg26249873 | 0.04912 | 0.209027027 | 2.089307 | 6.46E-05 | hypermethylated |
| cg23500122 | 0.062   | 0.26382973  | 2.089267 | 2.78E-05 | hypermethylated |

|            |         |             |          |          |                 |
|------------|---------|-------------|----------|----------|-----------------|
| cg15775138 | 0.06907 | 0.293702162 | 2.088223 | 0.001556 | hypermethylated |
| cg11310950 | 0.05733 | 0.243685946 | 2.087661 | 1.21E-05 | hypermethylated |
| cg05502701 | 0.05267 | 0.223877297 | 2.087655 | 5.72E-05 | hypermethylated |
| cg04562217 | 0.07284 | 0.309556757 | 2.087401 | 1.15E-05 | hypermethylated |
| cg19607165 | 0.06185 | 0.262804865 | 2.087146 | 2.10E-06 | hypermethylated |
| cg05506365 | 0.07203 | 0.305842162 | 2.086117 | 8.15E-06 | hypermethylated |
| cg06469345 | 0.07767 | 0.329649189 | 2.085502 | 5.43E-06 | hypermethylated |
| cg23316253 | 0.079   | 0.335290811 | 2.085488 | 6.14E-06 | hypermethylated |
| cg26332560 | 0.07785 | 0.330337838 | 2.085173 | 1.37E-05 | hypermethylated |
| cg19267861 | 0.08903 | 0.377720541 | 2.084956 | 5.81E-06 | hypermethylated |
| cg01615424 | 0.07918 | 0.335838378 | 2.084559 | 1.18E-05 | hypermethylated |
| cg24415208 | 0.10751 | 0.455917838 | 2.084303 | 2.79E-06 | hypermethylated |
| cg07565505 | 0.11159 | 0.473215135 | 2.084288 | 1.47E-06 | hypermethylated |
| cg22660578 | 0.08711 | 0.369271351 | 2.083771 | 5.06E-05 | hypermethylated |
| cg15634398 | 0.0523  | 0.221631892 | 2.083283 | 4.36E-05 | hypermethylated |
| cg22235018 | 0.07569 | 0.320716216 | 2.083123 | 9.19E-06 | hypermethylated |
| cg11823511 | 0.10154 | 0.430224324 | 2.083041 | 1.72E-06 | hypermethylated |
| cg07152216 | 0.09649 | 0.408704324 | 2.082606 | 3.69E-06 | hypermethylated |
| cg04541474 | 0.08629 | 0.365475135 | 2.082508 | 3.26E-06 | hypermethylated |
| cg16696270 | 0.05416 | 0.229363243 | 2.082335 | 6.39E-06 | hypermethylated |
| cg07557260 | 0.0806  | 0.341332973 | 2.082328 | 1.15E-05 | hypermethylated |
| cg24328125 | 0.05632 | 0.238338378 | 2.081292 | 4.53E-05 | hypermethylated |
| cg18177414 | 0.10249 | 0.433662703 | 2.08109  | 1.28E-05 | hypermethylated |
| cg11372090 | 0.08268 | 0.349648108 | 2.080293 | 0.000123 | hypermethylated |
| cg06724588 | 0.08785 | 0.371478919 | 2.080166 | 6.57E-06 | hypermethylated |
| cg18415687 | 0.07565 | 0.319862703 | 2.080041 | 1.15E-05 | hypermethylated |
| cg18323912 | 0.07094 | 0.299935135 | 2.079979 | 0.000119 | hypermethylated |
| cg21530453 | 0.06148 | 0.259827027 | 2.079362 | 0.000287 | hypermethylated |
| cg15852891 | 0.05177 | 0.218775676 | 2.079264 | 1.54E-05 | hypermethylated |
| cg15092168 | 0.07227 | 0.305393514 | 2.079201 | 3.15E-05 | hypermethylated |
| cg21549195 | 0.08001 | 0.338061622 | 2.079034 | 1.06E-05 | hypermethylated |
| cg07379434 | 0.05444 | 0.229984324 | 2.078797 | 1.31E-05 | hypermethylated |
| cg08862035 | 0.07286 | 0.307777838 | 2.07869  | 4.36E-05 | hypermethylated |
| cg12393318 | 0.08496 | 0.35877027  | 2.078205 | 4.24E-06 | hypermethylated |
| cg11850773 | 0.08011 | 0.338187027 | 2.077767 | 8.60E-06 | hypermethylated |
| cg19650157 | 0.0726  | 0.306458919 | 2.077652 | 7.12E-06 | hypermethylated |
| cg10703826 | 0.10059 | 0.424497838 | 2.07727  | 2.05E-06 | hypermethylated |
| cg05604079 | 0.07998 | 0.337480541 | 2.077093 | 7.03E-05 | hypermethylated |
| cg21195256 | 0.10692 | 0.45110973  | 2.076947 | 2.64E-06 | hypermethylated |
| cg17352975 | 0.0671  | 0.283089189 | 2.076872 | 2.87E-06 | hypermethylated |
| cg07962143 | 0.10798 | 0.455375135 | 2.076291 | 5.14E-06 | hypermethylated |
| cg15985191 | 0.07687 | 0.324135676 | 2.076105 | 2.71E-05 | hypermethylated |
| cg11601523 | 0.07269 | 0.306505946 | 2.076086 | 3.79E-06 | hypermethylated |
| cg25916711 | 0.07544 | 0.317944324 | 2.075373 | 6.39E-06 | hypermethylated |
| cg04908789 | 0.05395 | 0.227294054 | 2.074865 | 3.62E-05 | hypermethylated |
| cg17774559 | 0.12738 | 0.536657838 | 2.074864 | 7.32E-06 | hypermethylated |
| cg24621437 | 0.08861 | 0.373270811 | 2.074681 | 2.64E-05 | hypermethylated |
| cg07746943 | 0.07708 | 0.324511351 | 2.07384  | 0.000287 | hypermethylated |
| cg21347353 | 0.06505 | 0.273665946 | 2.072795 | 2.39E-06 | hypermethylated |
| cg27296293 | 0.08578 | 0.360771892 | 2.072374 | 4.60E-06 | hypermethylated |
| cg21126583 | 0.08276 | 0.347838919 | 2.071414 | 0.000115 | hypermethylated |
| cg04733537 | 0.07204 | 0.302723784 | 2.071132 | 1.01E-05 | hypermethylated |
| cg17924936 | 0.0945  | 0.396985405 | 2.0707   | 2.78E-05 | hypermethylated |
| cg23676682 | 0.06026 | 0.25313027  | 2.070607 | 6.13E-06 | hypermethylated |
| cg11120927 | 0.07372 | 0.30956     | 2.070091 | 0.00291  | hypermethylated |
| cg02228111 | 0.07513 | 0.315425946 | 2.06984  | 3.04E-05 | hypermethylated |
| cg02610222 | 0.0632  | 0.265331351 | 2.069799 | 8.95E-06 | hypermethylated |
| cg02637318 | 0.09216 | 0.38682     | 2.06945  | 0.000113 | hypermethylated |

|            |         |             |          |          |                 |
|------------|---------|-------------|----------|----------|-----------------|
| cg04389897 | 0.09048 | 0.379734595 | 2.069321 | 1.44E-05 | hypermethylated |
| cg20631014 | 0.05238 | 0.219806486 | 2.069146 | 0.000129 | hypermethylated |
| cg04276723 | 0.05631 | 0.236231892 | 2.068741 | 4.12E-06 | hypermethylated |
| cg00040312 | 0.07562 | 0.317214054 | 2.068617 | 2.18E-05 | hypermethylated |
| cg15140703 | 0.07476 | 0.313576757 | 2.06848  | 1.75E-05 | hypermethylated |
| cg24848035 | 0.08771 | 0.367711892 | 2.067763 | 1.89E-05 | hypermethylated |
| cg00483562 | 0.07755 | 0.325076757 | 2.067582 | 1.54E-06 | hypermethylated |
| cg05495351 | 0.07353 | 0.308215676 | 2.067535 | 9.57E-06 | hypermethylated |
| cg15854847 | 0.08328 | 0.34906973  | 2.067473 | 1.42E-05 | hypermethylated |
| cg19594305 | 0.08573 | 0.359261081 | 2.067161 | 2.78E-05 | hypermethylated |
| cg22793136 | 0.06499 | 0.272341622 | 2.067128 | 4.26E-05 | hypermethylated |
| cg07498624 | 0.0479  | 0.200725405 | 2.067126 | 7.03E-06 | hypermethylated |
| cg07489502 | 0.07697 | 0.322533514 | 2.067081 | 5.89E-06 | hypermethylated |
| cg00355281 | 0.0813  | 0.340647568 | 2.066953 | 2.51E-05 | hypermethylated |
| cg16291880 | 0.06164 | 0.258248108 | 2.066819 | 8.60E-06 | hypermethylated |
| cg10762626 | 0.08728 | 0.365631351 | 2.066667 | 1.25E-05 | hypermethylated |
| cg05769349 | 0.06707 | 0.280964324 | 2.066647 | 5.43E-06 | hypermethylated |
| cg01792403 | 0.06988 | 0.292593514 | 2.065946 | 2.45E-05 | hypermethylated |
| cg03843000 | 0.07682 | 0.321589189 | 2.065665 | 3.21E-06 | hypermethylated |
| cg02268225 | 0.06444 | 0.269674595 | 2.065191 | 0.001176 | hypermethylated |
| cg06660530 | 0.06326 | 0.264521622 | 2.06402  | 7.22E-06 | hypermethylated |
| cg08304190 | 0.0917  | 0.383306486 | 2.063505 | 2.87E-06 | hypermethylated |
| cg26123605 | 0.07501 | 0.313510811 | 2.06336  | 2.36E-06 | hypermethylated |
| cg24032666 | 0.11383 | 0.475702703 | 2.063179 | 9.69E-06 | hypermethylated |
| cg23363202 | 0.06209 | 0.259473514 | 2.063154 | 8.60E-06 | hypermethylated |
| cg10730712 | 0.0857  | 0.358031351 | 2.062719 | 1.21E-05 | hypermethylated |
| cg02315940 | 0.07057 | 0.294808108 | 2.062649 | 6.38E-05 | hypermethylated |
| cg21127068 | 0.06227 | 0.259996757 | 2.061884 | 5.06E-05 | hypermethylated |
| cg26843074 | 0.07388 | 0.308220541 | 2.060707 | 9.27E-05 | hypermethylated |
| cg16138150 | 0.06188 | 0.258117297 | 2.060482 | 6.57E-06 | hypermethylated |
| cg09221867 | 0.10094 | 0.420998378 | 2.060317 | 1.90E-06 | hypermethylated |
| cg08487063 | 0.05012 | 0.209030811 | 2.060257 | 2.51E-05 | hypermethylated |
| cg15408073 | 0.06373 | 0.265784324 | 2.060211 | 1.39E-05 | hypermethylated |
| cg01718742 | 0.08446 | 0.352225946 | 2.060161 | 7.22E-06 | hypermethylated |
| cg20855565 | 0.0663  | 0.276456757 | 2.059973 | 2.49E-06 | hypermethylated |
| cg10253847 | 0.05382 | 0.224352973 | 2.059556 | 2.96E-05 | hypermethylated |
| cg05347927 | 0.07824 | 0.326114054 | 2.059398 | 3.07E-05 | hypermethylated |
| cg09686443 | 0.08333 | 0.347258919 | 2.059104 | 3.15E-05 | hypermethylated |
| cg24127719 | 0.09682 | 0.403427027 | 2.058931 | 2.36E-06 | hypermethylated |
| cg08013557 | 0.08382 | 0.349169189 | 2.05856  | 1.12E-05 | hypermethylated |
| cg01500945 | 0.09431 | 0.392784865 | 2.058257 | 7.42E-06 | hypermethylated |
| cg03078269 | 0.12287 | 0.511715135 | 2.058208 | 4.24E-06 | hypermethylated |
| cg27271486 | 0.074   | 0.308145946 | 2.058017 | 1.75E-05 | hypermethylated |
| cg16619425 | 0.08533 | 0.355322703 | 2.058005 | 7.83E-06 | hypermethylated |
| cg03983645 | 0.08214 | 0.341972432 | 2.057723 | 1.39E-05 | hypermethylated |
| cg21649258 | 0.07634 | 0.317717838 | 2.057235 | 0.000202 | hypermethylated |
| cg10397440 | 0.04716 | 0.196238378 | 2.056972 | 1.05E-05 | hypermethylated |
| cg19923650 | 0.09568 | 0.397680541 | 2.055321 | 4.24E-06 | hypermethylated |
| cg03036592 | 0.06895 | 0.28652     | 2.055013 | 6.05E-06 | hypermethylated |
| cg15759937 | 0.06825 | 0.283597297 | 2.054943 | 9.72E-05 | hypermethylated |
| cg02428119 | 0.08993 | 0.373677838 | 2.054921 | 3.64E-06 | hypermethylated |
| cg19870698 | 0.06302 | 0.261829189 | 2.054744 | 7.56E-05 | hypermethylated |
| cg19414591 | 0.06293 | 0.261403784 | 2.05446  | 1.15E-06 | hypermethylated |
| cg20059140 | 0.05792 | 0.240544865 | 2.054172 | 3.69E-06 | hypermethylated |
| cg16509851 | 0.09123 | 0.37874     | 2.053628 | 5.43E-06 | hypermethylated |
| cg20755170 | 0.07317 | 0.303543784 | 2.05258  | 8.60E-06 | hypermethylated |
| cg10698355 | 0.04849 | 0.201140541 | 2.052445 | 4.12E-06 | hypermethylated |
| cg15922174 | 0.08263 | 0.342752973 | 2.052432 | 0.000187 | hypermethylated |

|            |         |             |          |          |                 |
|------------|---------|-------------|----------|----------|-----------------|
| cg26115633 | 0.12391 | 0.513952973 | 2.052344 | 2.68E-06 | hypermethylated |
| cg16589299 | 0.07242 | 0.300378378 | 2.052321 | 6.57E-06 | hypermethylated |
| cg04047221 | 0.07428 | 0.308056757 | 2.05215  | 4.12E-06 | hypermethylated |
| cg05893614 | 0.06057 | 0.251178378 | 2.052037 | 2.96E-05 | hypermethylated |
| cg08711858 | 0.08202 | 0.339952973 | 2.051288 | 8.03E-05 | hypermethylated |
| cg22849427 | 0.06019 | 0.249431351 | 2.051047 | 4.80E-06 | hypermethylated |
| cg17816908 | 0.08361 | 0.346472432 | 2.050993 | 1.89E-05 | hypermethylated |
| cg24437715 | 0.06264 | 0.259416216 | 2.050113 | 0.000185 | hypermethylated |
| cg19091036 | 0.07975 | 0.330091892 | 2.049311 | 1.18E-05 | hypermethylated |
| cg16104915 | 0.06344 | 0.262556216 | 2.049162 | 3.81E-05 | hypermethylated |
| cg27376707 | 0.09234 | 0.382121081 | 2.049002 | 5.00E-06 | hypermethylated |
| cg16230141 | 0.06262 | 0.259069189 | 2.048642 | 0.000165 | hypermethylated |
| cg27019126 | 0.05585 | 0.230995676 | 2.048237 | 3.85E-05 | hypermethylated |
| cg08528231 | 0.06419 | 0.265366486 | 2.047566 | 9.96E-06 | hypermethylated |
| cg18961681 | 0.11646 | 0.481423243 | 2.047471 | 6.22E-06 | hypermethylated |
| cg22523852 | 0.0609  | 0.25164973  | 2.046903 | 0.000166 | hypermethylated |
| cg23432345 | 0.06375 | 0.263425405 | 2.046897 | 3.39E-06 | hypermethylated |
| cg00814733 | 0.06497 | 0.268418919 | 2.046641 | 5.86E-05 | hypermethylated |
| cg25377802 | 0.06179 | 0.255098919 | 2.045612 | 1.66E-05 | hypermethylated |
| cg15564098 | 0.11457 | 0.472912973 | 2.045345 | 7.12E-06 | hypermethylated |
| cg04154276 | 0.0585  | 0.241402162 | 2.04493  | 7.72E-06 | hypermethylated |
| cg09786701 | 0.07185 | 0.296145405 | 2.043246 | 1.21E-05 | hypermethylated |
| cg04894619 | 0.07613 | 0.313665946 | 2.042692 | 2.78E-05 | hypermethylated |
| cg03574723 | 0.08562 | 0.352721081 | 2.042508 | 3.44E-06 | hypermethylated |
| cg11965976 | 0.09011 | 0.371206486 | 2.042463 | 0.000111 | hypermethylated |
| cg12258042 | 0.08871 | 0.365310811 | 2.041956 | 2.04E-05 | hypermethylated |
| cg22749589 | 0.0695  | 0.286084324 | 2.041356 | 5.25E-05 | hypermethylated |
| cg23890008 | 0.04845 | 0.199356757 | 2.040784 | 1.09E-05 | hypermethylated |
| cg18894648 | 0.07915 | 0.325668649 | 2.040744 | 7.32E-06 | hypermethylated |
| cg14776201 | 0.07753 | 0.318934595 | 2.040434 | 2.38E-05 | hypermethylated |
| cg07849944 | 0.07947 | 0.326884865 | 2.0403   | 2.10E-05 | hypermethylated |
| cg13721404 | 0.07519 | 0.309231892 | 2.040076 | 5.79E-05 | hypermethylated |
| cg24496841 | 0.09273 | 0.38128     | 2.039743 | 1.94E-05 | hypermethylated |
| cg04666975 | 0.05572 | 0.229051892 | 2.039407 | 1.29E-06 | hypermethylated |
| cg15916399 | 0.08056 | 0.331026486 | 2.038811 | 1.62E-05 | hypermethylated |
| cg16027761 | 0.08968 | 0.36846     | 2.03865  | 6.22E-06 | hypermethylated |
| cg01739725 | 0.08171 | 0.335700541 | 2.03859  | 7.03E-06 | hypermethylated |
| cg12581627 | 0.08196 | 0.33668973  | 2.038428 | 3.76E-05 | hypermethylated |
| cg19591056 | 0.06875 | 0.282333514 | 2.037969 | 3.40E-05 | hypermethylated |
| cg09410234 | 0.0778  | 0.319415676 | 2.037593 | 3.26E-06 | hypermethylated |
| cg14573411 | 0.06856 | 0.281434054 | 2.037358 | 0.000137 | hypermethylated |
| cg13663793 | 0.06863 | 0.281595135 | 2.036711 | 6.01E-05 | hypermethylated |
| cg03156893 | 0.09227 | 0.378576757 | 2.036652 | 1.71E-05 | hypermethylated |
| cg15282819 | 0.07135 | 0.292658378 | 2.036232 | 9.69E-06 | hypermethylated |
| cg25254825 | 0.049   | 0.200962703 | 2.036074 | 1.54E-05 | hypermethylated |
| cg12836959 | 0.08616 | 0.353215676 | 2.035459 | 6.57E-06 | hypermethylated |
| cg02656891 | 0.09827 | 0.402763243 | 2.035109 | 9.07E-06 | hypermethylated |
| cg15219228 | 0.09664 | 0.396028108 | 2.03491  | 1.94E-05 | hypermethylated |
| cg00956199 | 0.09135 | 0.374243243 | 2.0345   | 6.22E-06 | hypermethylated |
| cg18325622 | 0.07605 | 0.311491351 | 2.034172 | 1.94E-05 | hypermethylated |
| cg15475851 | 0.05926 | 0.242536216 | 2.03307  | 6.31E-05 | hypermethylated |
| cg14658067 | 0.09325 | 0.38163027  | 2.033    | 8.60E-06 | hypermethylated |
| cg16330450 | 0.074   | 0.302846486 | 2.032989 | 7.32E-06 | hypermethylated |
| cg04425920 | 0.11129 | 0.455422162 | 2.032881 | 4.60E-07 | hypermethylated |
| cg23082454 | 0.0641  | 0.262218378 | 2.032373 | 9.49E-05 | hypermethylated |
| cg04398581 | 0.07722 | 0.315657297 | 2.031313 | 3.39E-06 | hypermethylated |
| cg00294096 | 0.05757 | 0.235228108 | 2.030671 | 2.10E-05 | hypermethylated |
| cg17768491 | 0.08189 | 0.334463784 | 2.030091 | 0.0002   | hypermethylated |

|            |         |             |          |          |                 |
|------------|---------|-------------|----------|----------|-----------------|
| cg18146843 | 0.0741  | 0.302637838 | 2.030047 | 5.00E-05 | hypermethylated |
| cg00152008 | 0.08025 | 0.327725405 | 2.029914 | 6.57E-06 | hypermethylated |
| cg05547777 | 0.0758  | 0.309484865 | 2.029599 | 3.30E-06 | hypermethylated |
| cg24280540 | 0.06924 | 0.282684865 | 2.029517 | 0.000124 | hypermethylated |
| cg17802600 | 0.08917 | 0.364012432 | 2.029357 | 3.11E-05 | hypermethylated |
| cg07857243 | 0.06761 | 0.275953514 | 2.029117 | 1.31E-05 | hypermethylated |
| cg17147045 | 0.07035 | 0.287035676 | 2.028608 | 0.000216 | hypermethylated |
| cg27615388 | 0.09377 | 0.382552432 | 2.028459 | 3.79E-06 | hypermethylated |
| cg19081437 | 0.05116 | 0.208643243 | 2.02795  | 0.00044  | hypermethylated |
| cg05295557 | 0.08056 | 0.328515135 | 2.027824 | 0.000703 | hypermethylated |
| cg02909136 | 0.08445 | 0.344302162 | 2.027506 | 3.40E-05 | hypermethylated |
| cg00926215 | 0.06856 | 0.279382162 | 2.026801 | 1.04E-05 | hypermethylated |
| cg03323696 | 0.07724 | 0.314652973 | 2.026342 | 9.57E-06 | hypermethylated |
| cg10126205 | 0.10804 | 0.43994     | 2.025741 | 2.57E-06 | hypermethylated |
| cg12973118 | 0.05192 | 0.211345946 | 2.025244 | 4.64E-05 | hypermethylated |
| cg20289688 | 0.08519 | 0.346756757 | 2.025168 | 1.14E-05 | hypermethylated |
| cg03002848 | 0.07101 | 0.289005405 | 2.025002 | 5.06E-05 | hypermethylated |
| cg23883696 | 0.09659 | 0.393023784 | 2.024671 | 3.49E-06 | hypermethylated |
| cg20464804 | 0.06915 | 0.281284324 | 2.024228 | 3.95E-05 | hypermethylated |
| cg09735723 | 0.0691  | 0.281068649 | 2.024165 | 7.93E-06 | hypermethylated |
| cg24708471 | 0.1043  | 0.424154595 | 2.023851 | 8.83E-06 | hypermethylated |
| cg15353031 | 0.06915 | 0.281185405 | 2.023721 | 8.83E-06 | hypermethylated |
| cg07198552 | 0.09486 | 0.385711892 | 2.023652 | 1.82E-06 | hypermethylated |
| cg06639332 | 0.07284 | 0.296129189 | 2.023424 | 2.15E-05 | hypermethylated |
| cg15384598 | 0.0782  | 0.317897838 | 2.023323 | 4.47E-05 | hypermethylated |
| cg14123942 | 0.07321 | 0.297578378 | 2.023157 | 6.78E-05 | hypermethylated |
| cg12091642 | 0.07588 | 0.308424324 | 2.023125 | 4.26E-05 | hypermethylated |
| cg20383155 | 0.06696 | 0.272152973 | 2.023046 | 2.10E-05 | hypermethylated |
| cg10877086 | 0.05045 | 0.204888108 | 2.02191  | 4.93E-06 | hypermethylated |
| cg05660670 | 0.05611 | 0.227788108 | 2.021363 | 7.56E-05 | hypermethylated |
| cg01108118 | 0.06188 | 0.251142703 | 2.020962 | 2.51E-05 | hypermethylated |
| cg07339783 | 0.06402 | 0.259741622 | 2.020483 | 2.27E-05 | hypermethylated |
| cg03781266 | 0.07108 | 0.288322162 | 2.020166 | 7.72E-06 | hypermethylated |
| cg11142705 | 0.0714  | 0.289311892 | 2.01863  | 6.93E-06 | hypermethylated |
| cg10216615 | 0.07901 | 0.320067568 | 2.018269 | 5.89E-06 | hypermethylated |
| cg26157386 | 0.07547 | 0.305589189 | 2.017618 | 1.46E-05 | hypermethylated |
| cg03289872 | 0.09972 | 0.403610811 | 2.01701  | 7.12E-06 | hypermethylated |
| cg00027083 | 0.08229 | 0.333027027 | 2.01685  | 3.85E-05 | hypermethylated |
| cg27125044 | 0.06276 | 0.253934595 | 2.01654  | 7.52E-06 | hypermethylated |
| cg16407471 | 0.09127 | 0.369272973 | 2.016475 | 5.43E-06 | hypermethylated |
| cg06256858 | 0.05686 | 0.230048649 | 2.016453 | 8.84E-05 | hypermethylated |
| cg24129977 | 0.08962 | 0.362583784 | 2.016422 | 3.04E-06 | hypermethylated |
| cg14590098 | 0.06728 | 0.272139459 | 2.016097 | 5.00E-06 | hypermethylated |
| cg08744177 | 0.0696  | 0.281508108 | 2.016017 | 4.05E-05 | hypermethylated |
| cg07847863 | 0.09294 | 0.375755135 | 2.015421 | 2.10E-06 | hypermethylated |
| cg05161082 | 0.07664 | 0.309756757 | 2.014966 | 1.25E-05 | hypermethylated |
| cg26337312 | 0.0552  | 0.223094054 | 2.014912 | 2.96E-05 | hypermethylated |
| cg17898329 | 0.07072 | 0.285807027 | 2.014851 | 5.06E-05 | hypermethylated |
| cg12436377 | 0.08489 | 0.343016757 | 2.014613 | 5.86E-05 | hypermethylated |
| cg18363192 | 0.07653 | 0.309028108 | 2.013641 | 3.40E-05 | hypermethylated |
| cg12744820 | 0.09527 | 0.384495676 | 2.012873 | 4.24E-06 | hypermethylated |
| cg12786548 | 0.06097 | 0.245927027 | 2.012059 | 1.25E-05 | hypermethylated |
| cg10776919 | 0.0613  | 0.247247568 | 2.011997 | 1.30E-05 | hypermethylated |
| cg17255450 | 0.08851 | 0.356867027 | 2.011474 | 1.42E-05 | hypermethylated |
| cg08512142 | 0.06301 | 0.253874054 | 2.01046  | 1.80E-05 | hypermethylated |
| cg09907936 | 0.11473 | 0.462180541 | 2.010214 | 2.42E-05 | hypermethylated |
| cg25724283 | 0.07433 | 0.299408108 | 2.010097 | 0.000122 | hypermethylated |
| cg03751030 | 0.06713 | 0.270366486 | 2.009887 | 4.73E-06 | hypermethylated |



|            |         |             |          |          |                 |
|------------|---------|-------------|----------|----------|-----------------|
| cg12420104 | 0.06813 | 0.274387027 | 2.00985  | 2.15E-05 | hypermethylated |
| cg07039180 | 0.07128 | 0.287032432 | 2.009645 | 6.22E-06 | hypermethylated |
| cg16370491 | 0.07737 | 0.311554054 | 2.009636 | 7.72E-06 | hypermethylated |
| cg14118515 | 0.09487 | 0.381922703 | 2.009257 | 7.83E-06 | hypermethylated |
| cg10290764 | 0.05544 | 0.223134054 | 2.008912 | 3.32E-05 | hypermethylated |
| cg01436998 | 0.07687 | 0.309355676 | 2.008774 | 7.72E-06 | hypermethylated |
| cg04207385 | 0.06628 | 0.266728108 | 2.008724 | 2.32E-05 | hypermethylated |
| cg23712342 | 0.04889 | 0.196745405 | 2.008719 | 2.85E-05 | hypermethylated |
| cg02743222 | 0.08865 | 0.35668973  | 2.008477 | 4.01E-06 | hypermethylated |
| cg07150669 | 0.06228 | 0.250558378 | 2.008306 | 7.72E-06 | hypermethylated |
| cg08497530 | 0.06427 | 0.258481622 | 2.007844 | 3.76E-05 | hypermethylated |
| cg18406033 | 0.09546 | 0.383826486 | 2.007486 | 8.15E-06 | hypermethylated |
| cg21045464 | 0.08106 | 0.325924865 | 2.007477 | 8.04E-06 | hypermethylated |
| cg02182795 | 0.07183 | 0.288787027 | 2.007348 | 3.76E-05 | hypermethylated |
| cg26466587 | 0.09317 | 0.374188649 | 2.005828 | 1.09E-05 | hypermethylated |
| cg16880856 | 0.05934 | 0.238318919 | 2.005817 | 5.73E-06 | hypermethylated |
| cg21319323 | 0.06247 | 0.250861081 | 2.005653 | 7.20E-05 | hypermethylated |
| cg06906472 | 0.10254 | 0.411738919 | 2.005543 | 1.25E-05 | hypermethylated |
| cg07442479 | 0.07816 | 0.313712973 | 2.004943 | 2.27E-05 | hypermethylated |
| cg06550340 | 0.06268 | 0.251561622 | 2.004835 | 1.67E-06 | hypermethylated |
| cg13482308 | 0.08361 | 0.335424324 | 2.00424  | 3.23E-05 | hypermethylated |
| cg05649108 | 0.07952 | 0.318960541 | 2.003988 | 8.63E-05 | hypermethylated |
| cg01975483 | 0.08262 | 0.331394595 | 2.003987 | 3.81E-05 | hypermethylated |
| cg22685966 | 0.08549 | 0.342675135 | 2.003014 | 6.93E-06 | hypermethylated |
| cg11119746 | 0.07988 | 0.320158919 | 2.002882 | 4.94E-05 | hypermethylated |
| cg18921980 | 0.07016 | 0.281107568 | 2.002402 | 4.47E-05 | hypermethylated |
| cg16318271 | 0.07807 | 0.312745405 | 2.002149 | 2.71E-06 | hypermethylated |
| cg12860391 | 0.0775  | 0.310134054 | 2.000624 | 6.57E-06 | hypermethylated |
| cg11531579 | 0.05093 | 0.203741081 | 2.000149 | 1.71E-05 | hypermethylated |
| cg05835105 | 0.12098 | 0.483871351 | 1.999855 | 3.39E-06 | hypermethylated |
| cg15959715 | 0.0874  | 0.34952973  | 1.99971  | 0.000155 | hypermethylated |
| cg16420199 | 0.07209 | 0.288293514 | 1.999667 | 0.000135 | hypermethylated |
| cg22702328 | 0.08626 | 0.344865946 | 1.999272 | 2.10E-05 | hypermethylated |
| cg23331421 | 0.10526 | 0.420637838 | 1.998621 | 5.50E-06 | hypermethylated |
| cg12751432 | 0.08735 | 0.349057838 | 1.998586 | 1.05E-05 | hypermethylated |
| cg02721665 | 0.08192 | 0.327278919 | 1.998233 | 9.07E-06 | hypermethylated |
| cg24408656 | 0.06647 | 0.265532973 | 1.998116 | 5.06E-05 | hypermethylated |
| cg08156066 | 0.07156 | 0.285783243 | 1.997696 | 8.83E-06 | hypermethylated |
| cg16137995 | 0.05067 | 0.202276757 | 1.997127 | 2.96E-05 | hypermethylated |
| cg27264249 | 0.06559 | 0.261828108 | 1.997072 | 3.49E-06 | hypermethylated |
| cg22029275 | 0.08945 | 0.357047027 | 1.996961 | 7.65E-05 | hypermethylated |
| cg16865446 | 0.10214 | 0.407461081 | 1.996114 | 1.71E-05 | hypermethylated |
| cg23130131 | 0.0885  | 0.353046486 | 1.996109 | 6.84E-06 | hypermethylated |
| cg03057083 | 0.08875 | 0.354035135 | 1.996074 | 5.06E-05 | hypermethylated |
| cg16927040 | 0.09227 | 0.367915676 | 1.995442 | 5.58E-06 | hypermethylated |
| cg08330224 | 0.07346 | 0.292764865 | 1.994712 | 4.05E-05 | hypermethylated |
| cg14391419 | 0.10077 | 0.401425946 | 1.994068 | 7.12E-06 | hypermethylated |
| cg12776966 | 0.08605 | 0.342629189 | 1.993401 | 9.07E-06 | hypermethylated |
| cg14445507 | 0.08582 | 0.341710811 | 1.99339  | 3.85E-05 | hypermethylated |
| cg03496122 | 0.08018 | 0.319246486 | 1.993356 | 6.31E-05 | hypermethylated |
| cg01501009 | 0.07178 | 0.285789189 | 1.993298 | 2.16E-06 | hypermethylated |
| cg11891579 | 0.08434 | 0.335707027 | 1.992914 | 0.000789 | hypermethylated |
| cg20354141 | 0.07079 | 0.281764865 | 1.992874 | 2.13E-05 | hypermethylated |
| cg15091407 | 0.07076 | 0.281603784 | 1.992661 | 2.71E-06 | hypermethylated |
| cg26339504 | 0.0561  | 0.223210811 | 1.992334 | 4.54E-06 | hypermethylated |
| cg11205072 | 0.09804 | 0.390027568 | 1.992134 | 8.60E-06 | hypermethylated |
| cg20405893 | 0.07432 | 0.295591892 | 1.991784 | 8.60E-06 | hypermethylated |
| cg09792881 | 0.07884 | 0.313516216 | 1.99154  | 0.000921 | hypermethylated |

|            |         |             |          |          |                 |
|------------|---------|-------------|----------|----------|-----------------|
| cg14349667 | 0.08836 | 0.351184324 | 1.990763 | 2.95E-06 | hypermethylated |
| cg01559663 | 0.08313 | 0.330372432 | 1.990652 | 7.32E-06 | hypermethylated |
| cg18382893 | 0.08191 | 0.325507568 | 1.99058  | 1.22E-06 | hypermethylated |
| cg01256089 | 0.05936 | 0.235845405 | 1.990278 | 9.82E-06 | hypermethylated |
| cg03200166 | 0.10144 | 0.402967568 | 1.990037 | 1.99E-05 | hypermethylated |
| cg18448949 | 0.09032 | 0.358777838 | 1.989973 | 8.60E-06 | hypermethylated |
| cg12570712 | 0.08863 | 0.352040541 | 1.989875 | 1.46E-05 | hypermethylated |
| cg24909548 | 0.09071 | 0.360300541 | 1.989867 | 4.60E-06 | hypermethylated |
| cg14451382 | 0.11569 | 0.459443243 | 1.989622 | 2.29E-06 | hypermethylated |
| cg06151165 | 0.08435 | 0.334942703 | 1.989454 | 4.26E-05 | hypermethylated |
| cg11630404 | 0.08186 | 0.325005946 | 1.989236 | 9.44E-06 | hypermethylated |
| cg03444245 | 0.06812 | 0.270316216 | 1.988498 | 5.06E-05 | hypermethylated |
| cg02621130 | 0.06634 | 0.263181081 | 1.988105 | 6.22E-06 | hypermethylated |
| cg16033053 | 0.07287 | 0.288983784 | 1.987592 | 0.000756 | hypermethylated |
| cg19885761 | 0.10406 | 0.412634054 | 1.987447 | 2.64E-05 | hypermethylated |
| cg04150495 | 0.10037 | 0.397954595 | 1.987276 | 5.89E-06 | hypermethylated |
| cg01981601 | 0.06727 | 0.26661027  | 1.986697 | 2.57E-05 | hypermethylated |
| cg04545136 | 0.06085 | 0.241145405 | 1.986574 | 4.70E-05 | hypermethylated |
| cg01382137 | 0.08767 | 0.347384865 | 1.98638  | 3.04E-06 | hypermethylated |
| cg17757602 | 0.09287 | 0.367868108 | 1.985904 | 8.83E-06 | hypermethylated |
| cg07924874 | 0.06026 | 0.238648649 | 1.985616 | 0.000403 | hypermethylated |
| cg09359114 | 0.11188 | 0.44290973  | 1.985061 | 2.57E-06 | hypermethylated |
| cg20286200 | 0.08611 | 0.340848108 | 1.984876 | 3.19E-05 | hypermethylated |
| cg09747169 | 0.05484 | 0.217036757 | 1.984639 | 8.13E-05 | hypermethylated |
| cg24723331 | 0.07323 | 0.28972     | 1.984153 | 1.12E-05 | hypermethylated |
| cg22721334 | 0.08105 | 0.320639459 | 1.984068 | 0.000412 | hypermethylated |
| cg05854644 | 0.059   | 0.233405405 | 1.984051 | 0.000277 | hypermethylated |
| cg20337384 | 0.09076 | 0.358952432 | 1.983664 | 6.39E-06 | hypermethylated |
| cg18435449 | 0.08335 | 0.329604865 | 1.983483 | 1.92E-05 | hypermethylated |
| cg09354309 | 0.06963 | 0.275337838 | 1.983422 | 7.29E-05 | hypermethylated |
| cg17800654 | 0.10885 | 0.430401081 | 1.98334  | 5.67E-07 | hypermethylated |
| cg14676825 | 0.0833  | 0.329321081 | 1.983106 | 0.000303 | hypermethylated |
| cg06940614 | 0.08607 | 0.340261081 | 1.98306  | 4.36E-06 | hypermethylated |
| cg11657808 | 0.09844 | 0.389144324 | 1.982989 | 6.57E-06 | hypermethylated |
| cg13940693 | 0.07453 | 0.29457027  | 1.982719 | 1.09E-05 | hypermethylated |
| cg18416576 | 0.07874 | 0.310981081 | 1.981658 | 4.47E-05 | hypermethylated |
| cg00252282 | 0.07981 | 0.315171351 | 1.981495 | 1.25E-05 | hypermethylated |
| cg09793121 | 0.10913 | 0.430868649 | 1.9812   | 2.05E-06 | hypermethylated |
| cg14614901 | 0.06137 | 0.242298919 | 1.981182 | 8.95E-06 | hypermethylated |
| cg11831238 | 0.07528 | 0.297148649 | 1.980846 | 6.57E-06 | hypermethylated |
| cg16664405 | 0.11257 | 0.444323784 | 1.980789 | 9.57E-06 | hypermethylated |
| cg12618988 | 0.04412 | 0.174139459 | 1.980738 | 3.59E-06 | hypermethylated |
| cg16476975 | 0.09548 | 0.376791351 | 1.980495 | 0.000399 | hypermethylated |
| cg23906459 | 0.06599 | 0.260408649 | 1.980458 | 7.84E-05 | hypermethylated |
| cg05855917 | 0.08545 | 0.336976216 | 1.979494 | 9.82E-06 | hypermethylated |
| cg18863595 | 0.11145 | 0.439502162 | 1.979474 | 8.37E-06 | hypermethylated |
| cg16922279 | 0.08097 | 0.319143243 | 1.978745 | 6.84E-06 | hypermethylated |
| cg12238343 | 0.07744 | 0.305155676 | 1.978395 | 2.61E-05 | hypermethylated |
| cg05080154 | 0.08518 | 0.335629189 | 1.978282 | 5.89E-06 | hypermethylated |
| cg01718116 | 0.07535 | 0.296853514 | 1.978072 | 0.0002   | hypermethylated |
| cg12847373 | 0.067   | 0.263916757 | 1.97785  | 1.87E-05 | hypermethylated |
| cg27344859 | 0.06826 | 0.268849189 | 1.977685 | 4.76E-05 | hypermethylated |
| cg19290410 | 0.07364 | 0.289970811 | 1.977346 | 4.48E-06 | hypermethylated |
| cg21851351 | 0.07644 | 0.300950811 | 1.977128 | 2.74E-05 | hypermethylated |
| cg03365311 | 0.06991 | 0.275151351 | 1.976655 | 7.12E-06 | hypermethylated |
| cg19665362 | 0.08534 | 0.335745405 | 1.976074 | 0.000274 | hypermethylated |
| cg22108469 | 0.08668 | 0.340991351 | 1.975964 | 5.28E-06 | hypermethylated |
| cg17138769 | 0.0914  | 0.359537297 | 1.975875 | 8.60E-06 | hypermethylated |

|            |         |             |          |          |                 |
|------------|---------|-------------|----------|----------|-----------------|
| cg05542338 | 0.10696 | 0.420587027 | 1.975333 | 2.39E-05 | hypermethylated |
| cg13273396 | 0.08991 | 0.353397838 | 1.97474  | 5.97E-06 | hypermethylated |
| cg05949020 | 0.06238 | 0.245142162 | 1.974463 | 1.67E-06 | hypermethylated |
| cg14510333 | 0.05731 | 0.225021622 | 1.973205 | 4.70E-05 | hypermethylated |
| cg16956426 | 0.05574 | 0.218734054 | 1.972393 | 0.000335 | hypermethylated |
| cg24669528 | 0.05969 | 0.23418     | 1.972057 | 1.58E-05 | hypermethylated |
| cg24213719 | 0.0821  | 0.322098919 | 1.97205  | 9.49E-05 | hypermethylated |
| cg11413039 | 0.07903 | 0.31004973  | 1.972027 | 8.15E-06 | hypermethylated |
| cg25740565 | 0.09775 | 0.383430811 | 1.971798 | 2.57E-05 | hypermethylated |
| cg21852408 | 0.09136 | 0.358281081 | 1.971457 | 1.94E-05 | hypermethylated |
| cg02380531 | 0.07278 | 0.285233514 | 1.97053  | 3.07E-05 | hypermethylated |
| cg04025150 | 0.08967 | 0.351292432 | 1.969975 | 1.77E-05 | hypermethylated |
| cg10989897 | 0.08799 | 0.344617838 | 1.969586 | 9.07E-06 | hypermethylated |
| cg22282405 | 0.10127 | 0.396623784 | 1.969564 | 4.48E-06 | hypermethylated |
| cg27663938 | 0.07861 | 0.307845946 | 1.969424 | 2.74E-05 | hypermethylated |
| cg00076307 | 0.06792 | 0.265973514 | 1.969374 | 3.69E-06 | hypermethylated |
| cg00257047 | 0.06248 | 0.244662162 | 1.969325 | 1.75E-05 | hypermethylated |
| cg08315174 | 0.08736 | 0.341818919 | 1.968187 | 2.56E-06 | hypermethylated |
| cg03858756 | 0.07269 | 0.2844      | 1.968093 | 1.15E-05 | hypermethylated |
| cg03202804 | 0.07496 | 0.293266486 | 1.968019 | 1.42E-05 | hypermethylated |
| cg22614239 | 0.07826 | 0.306137297 | 1.967832 | 2.79E-06 | hypermethylated |
| cg17384380 | 0.06714 | 0.262618919 | 1.967726 | 3.96E-06 | hypermethylated |
| cg07349208 | 0.08136 | 0.318152973 | 1.967329 | 7.93E-06 | hypermethylated |
| cg05167251 | 0.10147 | 0.396765405 | 1.967233 | 4.48E-06 | hypermethylated |
| cg16587616 | 0.10719 | 0.419036216 | 1.966905 | 1.28E-05 | hypermethylated |
| cg02657401 | 0.12406 | 0.48482     | 1.966411 | 4.30E-06 | hypermethylated |
| cg24791025 | 0.05469 | 0.213721081 | 1.96638  | 9.82E-06 | hypermethylated |
| cg11294513 | 0.1115  | 0.435622703 | 1.966035 | 3.39E-06 | hypermethylated |
| cg15221604 | 0.09212 | 0.359765946 | 1.965472 | 6.62E-05 | hypermethylated |
| cg24101492 | 0.08608 | 0.336094595 | 1.965117 | 8.32E-05 | hypermethylated |
| cg12544951 | 0.0684  | 0.266967568 | 1.964596 | 8.37E-06 | hypermethylated |
| cg11689813 | 0.07895 | 0.308015676 | 1.963993 | 8.52E-05 | hypermethylated |
| cg09685182 | 0.08045 | 0.313857297 | 1.963944 | 1.50E-05 | hypermethylated |
| cg12993163 | 0.06772 | 0.264158919 | 1.963752 | 5.72E-05 | hypermethylated |
| cg21800232 | 0.06329 | 0.246858378 | 1.963634 | 0.000204 | hypermethylated |
| cg11213690 | 0.08995 | 0.350693514 | 1.963016 | 1.58E-05 | hypermethylated |
| cg08084616 | 0.08071 | 0.314654595 | 1.96295  | 2.48E-05 | hypermethylated |
| cg25898550 | 0.06655 | 0.259388649 | 1.962605 | 1.28E-05 | hypermethylated |
| cg02009585 | 0.07918 | 0.308602703 | 1.962543 | 3.39E-06 | hypermethylated |
| cg15585794 | 0.08074 | 0.314609189 | 1.962205 | 1.77E-05 | hypermethylated |
| cg19317211 | 0.07367 | 0.28704     | 1.962103 | 0.000111 | hypermethylated |
| cg08545287 | 0.07648 | 0.297987027 | 1.962095 | 9.31E-06 | hypermethylated |
| cg25738714 | 0.08165 | 0.318056216 | 1.961757 | 0.000327 | hypermethylated |
| cg05653707 | 0.07171 | 0.279324865 | 1.961698 | 5.38E-05 | hypermethylated |
| cg01104724 | 0.10597 | 0.412743243 | 1.961589 | 1.28E-05 | hypermethylated |
| cg19796981 | 0.07961 | 0.310014595 | 1.961315 | 1.21E-05 | hypermethylated |
| cg01735384 | 0.10986 | 0.427702162 | 1.96094  | 1.35E-05 | hypermethylated |
| cg21512644 | 0.10978 | 0.427336757 | 1.960758 | 1.88E-06 | hypermethylated |
| cg03704308 | 0.09914 | 0.385881081 | 1.960617 | 7.72E-06 | hypermethylated |
| cg21172458 | 0.06748 | 0.26258973  | 1.960279 | 2.56E-06 | hypermethylated |
| cg11546137 | 0.12349 | 0.480342703 | 1.95967  | 2.16E-06 | hypermethylated |
| cg23976499 | 0.06526 | 0.253823243 | 1.959553 | 7.29E-05 | hypermethylated |
| cg08498254 | 0.07898 | 0.307183243 | 1.95954  | 8.22E-05 | hypermethylated |
| cg02980079 | 0.07777 | 0.302421622 | 1.959276 | 8.22E-05 | hypermethylated |
| cg05736768 | 0.09797 | 0.380918378 | 1.95907  | 5.07E-06 | hypermethylated |
| cg08668790 | 0.10928 | 0.424883784 | 1.959039 | 4.36E-06 | hypermethylated |
| cg14317285 | 0.08479 | 0.329644324 | 1.958944 | 3.95E-05 | hypermethylated |
| cg09618102 | 0.09851 | 0.382902703 | 1.958636 | 1.18E-05 | hypermethylated |

|            |         |             |          |          |                 |
|------------|---------|-------------|----------|----------|-----------------|
| cg26449787 | 0.06951 | 0.270142162 | 1.958426 | 4.94E-05 | hypermethylated |
| cg05276469 | 0.11058 | 0.429656757 | 1.958094 | 3.79E-06 | hypermethylated |
| cg21865150 | 0.10893 | 0.423224324 | 1.958021 | 1.67E-06 | hypermethylated |
| cg26622320 | 0.09752 | 0.378723243 | 1.957374 | 3.79E-06 | hypermethylated |
| cg22248052 | 0.08289 | 0.321802162 | 1.956904 | 6.75E-06 | hypermethylated |
| cg11439596 | 0.10492 | 0.40678973  | 1.954994 | 1.71E-05 | hypermethylated |
| cg26158180 | 0.07102 | 0.275317838 | 1.954801 | 4.15E-05 | hypermethylated |
| cg23990012 | 0.0634  | 0.245569189 | 1.953575 | 9.82E-06 | hypermethylated |
| cg25763036 | 0.07087 | 0.274464324 | 1.953372 | 1.75E-05 | hypermethylated |
| cg12467749 | 0.07403 | 0.286679459 | 1.953257 | 7.52E-06 | hypermethylated |
| cg08417728 | 0.08443 | 0.326825946 | 1.952695 | 6.48E-06 | hypermethylated |
| cg20750832 | 0.12155 | 0.470514054 | 1.952688 | 6.39E-06 | hypermethylated |
| cg17746625 | 0.05309 | 0.205357297 | 1.951624 | 6.48E-06 | hypermethylated |
| cg07095995 | 0.07062 | 0.273057838 | 1.951058 | 8.22E-05 | hypermethylated |
| cg18384778 | 0.1238  | 0.478502162 | 1.950514 | 3.12E-06 | hypermethylated |
| cg05142982 | 0.11179 | 0.431892973 | 1.949883 | 7.47E-05 | hypermethylated |
| cg23572908 | 0.12345 | 0.476852973 | 1.949618 | 1.05E-05 | hypermethylated |
| cg07402669 | 0.08716 | 0.336663784 | 1.94957  | 1.80E-05 | hypermethylated |
| cg08747377 | 0.10022 | 0.38705027  | 1.949351 | 2.15E-05 | hypermethylated |
| cg02583418 | 0.07141 | 0.27576     | 1.949215 | 4.70E-05 | hypermethylated |
| cg09534159 | 0.099   | 0.382061622 | 1.948305 | 3.23E-05 | hypermethylated |
| cg22848598 | 0.09624 | 0.371378378 | 1.948181 | 0.000245 | hypermethylated |
| cg05349062 | 0.08215 | 0.316918919 | 1.947781 | 9.83E-05 | hypermethylated |
| cg03970036 | 0.11897 | 0.458461622 | 1.946203 | 2.64E-05 | hypermethylated |
| cg22036988 | 0.09545 | 0.36774973  | 1.945907 | 1.18E-05 | hypermethylated |
| cg21697851 | 0.08413 | 0.324102703 | 1.945759 | 1.28E-05 | hypermethylated |
| cg26014391 | 0.06124 | 0.235892432 | 1.945583 | 8.94E-05 | hypermethylated |
| cg10281977 | 0.08265 | 0.318315135 | 1.945369 | 5.06E-05 | hypermethylated |
| cg21651328 | 0.06743 | 0.259673514 | 1.945236 | 5.31E-05 | hypermethylated |
| cg00651523 | 0.07934 | 0.305462162 | 1.944873 | 2.91E-06 | hypermethylated |
| cg04111071 | 0.11098 | 0.42710973  | 1.944307 | 8.83E-06 | hypermethylated |
| cg21460081 | 0.05296 | 0.203800541 | 1.944183 | 0.000115 | hypermethylated |
| cg15953602 | 0.07474 | 0.287507027 | 1.943645 | 0.000112 | hypermethylated |
| cg04606210 | 0.07006 | 0.269437838 | 1.94329  | 3.62E-05 | hypermethylated |
| cg06850283 | 0.08791 | 0.338071892 | 1.943231 | 7.65E-05 | hypermethylated |
| cg12388007 | 0.06132 | 0.235808108 | 1.943184 | 5.00E-06 | hypermethylated |
| cg03437186 | 0.08195 | 0.315086486 | 1.942932 | 6.01E-05 | hypermethylated |
| cg05634149 | 0.07957 | 0.30584973  | 1.942526 | 6.46E-05 | hypermethylated |
| cg04130185 | 0.05877 | 0.225871892 | 1.942353 | 3.57E-05 | hypermethylated |
| cg01485075 | 0.12678 | 0.487224865 | 1.942261 | 1.18E-05 | hypermethylated |
| cg22471726 | 0.09297 | 0.356976757 | 1.940993 | 1.73E-05 | hypermethylated |
| cg04904385 | 0.07347 | 0.282092973 | 1.940944 | 2.42E-05 | hypermethylated |
| cg18197392 | 0.09183 | 0.352549189 | 1.940787 | 0.000111 | hypermethylated |
| cg15416279 | 0.09431 | 0.362047027 | 1.940694 | 8.10E-07 | hypermethylated |
| cg26857670 | 0.07659 | 0.293965946 | 1.940421 | 4.01E-06 | hypermethylated |
| cg13434308 | 0.09154 | 0.351245405 | 1.940005 | 2.32E-05 | hypermethylated |
| cg25846723 | 0.06881 | 0.264012432 | 1.939916 | 2.15E-05 | hypermethylated |
| cg18924324 | 0.09342 | 0.358321622 | 1.939452 | 4.70E-05 | hypermethylated |
| cg21883598 | 0.10817 | 0.414868649 | 1.939354 | 6.57E-06 | hypermethylated |
| cg20130213 | 0.09386 | 0.359967027 | 1.939282 | 5.14E-06 | hypermethylated |
| cg14568830 | 0.09111 | 0.34928     | 1.938703 | 6.57E-06 | hypermethylated |
| cg09578475 | 0.13955 | 0.534696216 | 1.937937 | 3.21E-06 | hypermethylated |
| cg21154627 | 0.07895 | 0.302371892 | 1.937313 | 7.12E-06 | hypermethylated |
| cg24199834 | 0.06476 | 0.247999459 | 1.937162 | 7.52E-06 | hypermethylated |
| cg01959730 | 0.10074 | 0.385781081 | 1.937146 | 3.39E-06 | hypermethylated |
| cg07969619 | 0.06475 | 0.247905946 | 1.936841 | 1.26E-05 | hypermethylated |
| cg00966398 | 0.05082 | 0.194545405 | 1.936639 | 1.48E-05 | hypermethylated |
| cg13242070 | 0.10034 | 0.384044324 | 1.936376 | 2.21E-05 | hypermethylated |

|            |         |             |          |          |                 |
|------------|---------|-------------|----------|----------|-----------------|
| cg18081940 | 0.11288 | 0.432022162 | 1.936315 | 6.93E-06 | hypermethylated |
| cg13267931 | 0.07489 | 0.286605405 | 1.936221 | 0.000112 | hypermethylated |
| cg18202449 | 0.08842 | 0.338347027 | 1.936059 | 3.15E-05 | hypermethylated |
| cg22851691 | 0.11158 | 0.426916216 | 1.935875 | 9.11E-07 | hypermethylated |
| cg00768993 | 0.07861 | 0.300585405 | 1.93499  | 1.92E-05 | hypermethylated |
| cg03949391 | 0.07262 | 0.277638378 | 1.934768 | 0.000207 | hypermethylated |
| cg18430555 | 0.0805  | 0.307754595 | 1.93472  | 1.46E-05 | hypermethylated |
| cg21745612 | 0.07881 | 0.301226486 | 1.934398 | 3.23E-05 | hypermethylated |
| cg04307561 | 0.1027  | 0.392514595 | 1.93431  | 8.26E-06 | hypermethylated |
| cg10024876 | 0.06346 | 0.242527568 | 1.934229 | 2.78E-05 | hypermethylated |
| cg12034383 | 0.09028 | 0.344962703 | 1.933962 | 0.00028  | hypermethylated |
| cg20646280 | 0.07793 | 0.297672432 | 1.933475 | 4.26E-05 | hypermethylated |
| cg04027805 | 0.04861 | 0.185531892 | 1.932342 | 3.69E-06 | hypermethylated |
| cg26983177 | 0.06959 | 0.265596757 | 1.932286 | 3.95E-05 | hypermethylated |
| cg08018585 | 0.09585 | 0.365717297 | 1.931879 | 2.92E-05 | hypermethylated |
| cg09676860 | 0.0662  | 0.252576216 | 1.931816 | 7.56E-05 | hypermethylated |
| cg23690166 | 0.11501 | 0.438742162 | 1.931614 | 1.04E-05 | hypermethylated |
| cg20011562 | 0.05378 | 0.205115676 | 1.931296 | 3.57E-05 | hypermethylated |
| cg00418282 | 0.0932  | 0.35540973  | 1.931081 | 3.49E-06 | hypermethylated |
| cg25717994 | 0.04847 | 0.184802703 | 1.930822 | 9.05E-05 | hypermethylated |
| cg04495995 | 0.08635 | 0.329193514 | 1.930668 | 1.12E-05 | hypermethylated |
| cg26860935 | 0.10798 | 0.411575676 | 1.930394 | 9.57E-06 | hypermethylated |
| cg20764116 | 0.05797 | 0.220941622 | 1.930287 | 2.27E-05 | hypermethylated |
| cg24934400 | 0.08707 | 0.331771892 | 1.929944 | 4.70E-05 | hypermethylated |
| cg00924004 | 0.07471 | 0.284667027 | 1.929902 | 3.19E-05 | hypermethylated |
| cg12161228 | 0.12257 | 0.466992973 | 1.929795 | 1.06E-05 | hypermethylated |
| cg23495279 | 0.10103 | 0.384915676 | 1.929759 | 1.31E-05 | hypermethylated |
| cg26609631 | 0.09507 | 0.362123243 | 1.929419 | 8.03E-05 | hypermethylated |
| cg04622777 | 0.07524 | 0.28646     | 1.928762 | 1.25E-05 | hypermethylated |
| cg04917226 | 0.10121 | 0.385317297 | 1.928695 | 1.18E-06 | hypermethylated |
| cg00937271 | 0.05942 | 0.226102703 | 1.927958 | 1.30E-05 | hypermethylated |
| cg26560222 | 0.08381 | 0.318884324 | 1.927839 | 7.12E-06 | hypermethylated |
| cg19542816 | 0.08805 | 0.3349      | 1.927335 | 0.0006   | hypermethylated |
| cg02582387 | 0.08378 | 0.318650811 | 1.927299 | 0.000166 | hypermethylated |
| cg06804433 | 0.05708 | 0.217016216 | 1.926746 | 2.15E-05 | hypermethylated |
| cg10445315 | 0.08427 | 0.320335676 | 1.926493 | 2.32E-05 | hypermethylated |
| cg16508480 | 0.10073 | 0.382801622 | 1.926104 | 1.50E-05 | hypermethylated |
| cg01603847 | 0.09556 | 0.363122703 | 1.925978 | 1.62E-05 | hypermethylated |
| cg13576883 | 0.0707  | 0.268617838 | 1.925773 | 3.40E-05 | hypermethylated |
| cg04630292 | 0.08727 | 0.331428649 | 1.925141 | 1.99E-06 | hypermethylated |
| cg00950846 | 0.07479 | 0.284004324 | 1.924996 | 2.15E-05 | hypermethylated |
| cg18491080 | 0.08367 | 0.317661081 | 1.924706 | 1.17E-05 | hypermethylated |
| cg11670651 | 0.08164 | 0.309821081 | 1.924087 | 6.62E-05 | hypermethylated |
| cg10443049 | 0.09002 | 0.341542162 | 1.923746 | 5.89E-06 | hypermethylated |
| cg06954658 | 0.05622 | 0.21326     | 1.923458 | 1.67E-06 | hypermethylated |
| cg16001495 | 0.07273 | 0.275868108 | 1.923356 | 1.28E-05 | hypermethylated |
| cg11994674 | 0.09647 | 0.365819459 | 1.92298  | 2.53E-06 | hypermethylated |
| cg09918296 | 0.07494 | 0.284142162 | 1.922805 | 1.31E-05 | hypermethylated |
| cg07103493 | 0.08924 | 0.338317297 | 1.922615 | 2.64E-06 | hypermethylated |
| cg02164046 | 0.10375 | 0.393294054 | 1.922497 | 7.93E-06 | hypermethylated |
| cg07104706 | 0.12298 | 0.46608973  | 1.922184 | 5.89E-06 | hypermethylated |
| cg03307893 | 0.0667  | 0.252741622 | 1.921905 | 0.000189 | hypermethylated |
| cg22399133 | 0.13183 | 0.499462703 | 1.921698 | 3.32E-05 | hypermethylated |
| cg17357285 | 0.08335 | 0.31555027  | 1.920616 | 1.35E-05 | hypermethylated |
| cg19254119 | 0.08081 | 0.305918919 | 1.920544 | 1.31E-05 | hypermethylated |
| cg07447922 | 0.09258 | 0.350427568 | 1.920344 | 3.07E-05 | hypermethylated |
| cg19050990 | 0.06425 | 0.243162162 | 1.92015  | 7.65E-05 | hypermethylated |
| cg15843567 | 0.09395 | 0.355448108 | 1.919674 | 0.000195 | hypermethylated |

|            |         |             |          |          |                 |
|------------|---------|-------------|----------|----------|-----------------|
| cg09341793 | 0.12996 | 0.491660541 | 1.919595 | 5.73E-06 | hypermethylated |
| cg03544320 | 0.14717 | 0.556671351 | 1.919342 | 2.42E-06 | hypermethylated |
| cg22131691 | 0.07974 | 0.30158973  | 1.919212 | 3.71E-05 | hypermethylated |
| cg21781988 | 0.06136 | 0.232070811 | 1.919195 | 4.01E-06 | hypermethylated |
| cg00310215 | 0.09685 | 0.366161622 | 1.918657 | 6.39E-06 | hypermethylated |
| cg06912966 | 0.07047 | 0.266363784 | 1.918317 | 3.53E-05 | hypermethylated |
| cg11667258 | 0.10214 | 0.385971892 | 1.917948 | 1.08E-05 | hypermethylated |
| cg13459498 | 0.09137 | 0.345272973 | 1.917945 | 9.95E-05 | hypermethylated |
| cg25308508 | 0.11828 | 0.446881081 | 1.917685 | 1.26E-06 | hypermethylated |
| cg05398903 | 0.10249 | 0.387097297 | 1.917213 | 6.22E-06 | hypermethylated |
| cg05743885 | 0.0789  | 0.297993514 | 1.917184 | 7.72E-06 | hypermethylated |
| cg14537713 | 0.07609 | 0.287275676 | 1.916657 | 1.31E-05 | hypermethylated |
| cg15712559 | 0.10215 | 0.385535135 | 1.916173 | 4.82E-05 | hypermethylated |
| cg25209842 | 0.09958 | 0.375654595 | 1.915479 | 3.11E-05 | hypermethylated |
| cg01921432 | 0.08942 | 0.33730973  | 1.915404 | 8.15E-06 | hypermethylated |
| cg05026135 | 0.07788 | 0.293754054 | 1.915284 | 5.21E-06 | hypermethylated |
| cg23217946 | 0.08688 | 0.327638378 | 1.915008 | 4.15E-05 | hypermethylated |
| cg11763094 | 0.07203 | 0.271632973 | 1.914989 | 1.26E-05 | hypermethylated |
| cg06321998 | 0.07796 | 0.293741622 | 1.913742 | 2.13E-05 | hypermethylated |
| cg04543938 | 0.11055 | 0.416215135 | 1.91263  | 6.62E-05 | hypermethylated |
| cg24748769 | 0.08514 | 0.320396757 | 1.911951 | 6.22E-06 | hypermethylated |
| cg02583633 | 0.07969 | 0.29974     | 1.911241 | 0.000209 | hypermethylated |
| cg20011402 | 0.08908 | 0.335051892 | 1.911211 | 0.000287 | hypermethylated |
| cg01268824 | 0.10479 | 0.393903243 | 1.91034  | 1.25E-05 | hypermethylated |
| cg24154839 | 0.07623 | 0.286514054 | 1.910175 | 2.57E-05 | hypermethylated |
| cg05991454 | 0.1048  | 0.393838919 | 1.909967 | 3.59E-06 | hypermethylated |
| cg07175883 | 0.07641 | 0.287062162 | 1.90953  | 3.15E-05 | hypermethylated |
| cg00131983 | 0.08179 | 0.30722973  | 1.909321 | 1.20E-05 | hypermethylated |
| cg17877704 | 0.07576 | 0.284575676 | 1.909304 | 1.46E-05 | hypermethylated |
| cg20066716 | 0.09887 | 0.371342162 | 1.909144 | 8.15E-06 | hypermethylated |
| cg24633978 | 0.10181 | 0.382331892 | 1.908946 | 1.82E-06 | hypermethylated |
| cg02166450 | 0.07655 | 0.287339459 | 1.908282 | 1.89E-05 | hypermethylated |
| cg15272362 | 0.07651 | 0.287144865 | 1.908059 | 0.00014  | hypermethylated |
| cg23894086 | 0.08248 | 0.309534054 | 1.907982 | 7.12E-06 | hypermethylated |
| cg26956874 | 0.08769 | 0.329026486 | 1.907719 | 9.31E-06 | hypermethylated |
| cg08875705 | 0.12057 | 0.452384865 | 1.90768  | 2.45E-05 | hypermethylated |
| cg09605164 | 0.08051 | 0.301972432 | 1.907177 | 7.93E-06 | hypermethylated |
| cg01159623 | 0.07647 | 0.286818378 | 1.907172 | 4.07E-06 | hypermethylated |
| cg20034792 | 0.08745 | 0.327945946 | 1.906928 | 0.00062  | hypermethylated |
| cg18722841 | 0.10238 | 0.383671892 | 1.905939 | 4.18E-06 | hypermethylated |
| cg11523712 | 0.06566 | 0.246056216 | 1.905901 | 1.21E-05 | hypermethylated |
| cg12565585 | 0.09709 | 0.363735135 | 1.905494 | 1.99E-05 | hypermethylated |
| cg12840502 | 0.07838 | 0.293584324 | 1.905217 | 9.05E-05 | hypermethylated |
| cg24351410 | 0.06276 | 0.235010811 | 1.90481  | 2.04E-05 | hypermethylated |
| cg16605327 | 0.0882  | 0.330251351 | 1.904714 | 8.15E-06 | hypermethylated |
| cg03692651 | 0.16569 | 0.62038     | 1.904666 | 7.72E-06 | hypermethylated |
| cg02317400 | 0.07807 | 0.292294054 | 1.90458  | 9.05E-05 | hypermethylated |
| cg21484228 | 0.08574 | 0.321001622 | 1.90454  | 0.00054  | hypermethylated |
| cg17957186 | 0.06809 | 0.254841081 | 1.904083 | 3.00E-05 | hypermethylated |
| cg26437826 | 0.0815  | 0.304963243 | 1.903763 | 2.85E-05 | hypermethylated |
| cg23460843 | 0.11562 | 0.432635135 | 1.90376  | 0.000182 | hypermethylated |
| cg19084589 | 0.07102 | 0.26568973  | 1.903445 | 3.07E-05 | hypermethylated |
| cg11315153 | 0.06501 | 0.243151892 | 1.903124 | 1.33E-05 | hypermethylated |
| cg12807794 | 0.08053 | 0.301154595 | 1.902906 | 6.75E-06 | hypermethylated |
| cg18629535 | 0.08732 | 0.32648     | 1.902611 | 1.68E-05 | hypermethylated |
| cg19761848 | 0.11486 | 0.429055676 | 1.901288 | 2.64E-05 | hypermethylated |
| cg18948722 | 0.0938  | 0.350335676 | 1.901078 | 1.80E-05 | hypermethylated |
| cg20787173 | 0.09429 | 0.352091892 | 1.900775 | 2.42E-05 | hypermethylated |

|            |         |             |          |          |                 |
|------------|---------|-------------|----------|----------|-----------------|
| cg14956197 | 0.06762 | 0.252467568 | 1.900576 | 3.23E-05 | hypermethylated |
| cg20495183 | 0.05889 | 0.219698378 | 1.89943  | 6.23E-05 | hypermethylated |
| cg24852548 | 0.09965 | 0.371650811 | 1.899006 | 2.15E-05 | hypermethylated |
| cg16458494 | 0.0896  | 0.333721622 | 1.897075 | 1.26E-05 | hypermethylated |
| cg14970666 | 0.07855 | 0.292543784 | 1.896969 | 3.61E-07 | hypermethylated |
| cg03782202 | 0.10442 | 0.388883243 | 1.896939 | 1.09E-05 | hypermethylated |
| cg24722073 | 0.08743 | 0.325605946 | 1.896927 | 8.15E-06 | hypermethylated |
| cg10575261 | 0.07128 | 0.265459459 | 1.896922 | 1.42E-05 | hypermethylated |
| cg16195091 | 0.09701 | 0.361165946 | 1.896456 | 1.84E-05 | hypermethylated |
| cg05313771 | 0.06462 | 0.240566486 | 1.896383 | 6.05E-06 | hypermethylated |
| cg25532099 | 0.08116 | 0.302095676 | 1.896165 | 0.000129 | hypermethylated |
| cg21158633 | 0.10047 | 0.373944324 | 1.896059 | 3.67E-05 | hypermethylated |
| cg14781189 | 0.07527 | 0.280103784 | 1.895815 | 3.00E-05 | hypermethylated |
| cg07028914 | 0.0786  | 0.292494054 | 1.895806 | 0.00028  | hypermethylated |
| cg14011639 | 0.07001 | 0.260478378 | 1.895531 | 1.92E-05 | hypermethylated |
| cg15985184 | 0.10316 | 0.383776757 | 1.895384 | 1.71E-05 | hypermethylated |
| cg08795964 | 0.10929 | 0.406564324 | 1.895322 | 4.12E-06 | hypermethylated |
| cg25540824 | 0.09797 | 0.364440541 | 1.895272 | 8.84E-07 | hypermethylated |
| cg07351192 | 0.09128 | 0.339544324 | 1.895229 | 8.37E-06 | hypermethylated |
| cg15484532 | 0.09341 | 0.347402162 | 1.894958 | 6.13E-06 | hypermethylated |
| cg09229683 | 0.05893 | 0.219154595 | 1.894875 | 3.21E-06 | hypermethylated |
| cg23208176 | 0.07258 | 0.269866486 | 1.894602 | 1.73E-05 | hypermethylated |
| cg07780543 | 0.09684 | 0.360028108 | 1.894435 | 9.31E-06 | hypermethylated |
| cg21145524 | 0.09831 | 0.36548973  | 1.894421 | 8.63E-05 | hypermethylated |
| cg27444994 | 0.09197 | 0.341622162 | 1.893166 | 1.62E-05 | hypermethylated |
| cg22499720 | 0.07817 | 0.290332973 | 1.893021 | 2.15E-05 | hypermethylated |
| cg21370856 | 0.09908 | 0.367915135 | 1.892707 | 1.60E-05 | hypermethylated |
| cg03032214 | 0.07213 | 0.267774054 | 1.892345 | 4.94E-05 | hypermethylated |
| cg04739647 | 0.08804 | 0.326724324 | 1.891843 | 5.14E-06 | hypermethylated |
| cg10427452 | 0.08057 | 0.298976757 | 1.891719 | 3.00E-05 | hypermethylated |
| cg24613080 | 0.13078 | 0.48516     | 1.891319 | 7.32E-06 | hypermethylated |
| cg00590139 | 0.08984 | 0.333221622 | 1.891052 | 3.76E-05 | hypermethylated |
| cg06360427 | 0.10361 | 0.384283243 | 1.891007 | 8.60E-06 | hypermethylated |
| cg23129478 | 0.07538 | 0.279561622 | 1.890913 | 2.15E-05 | hypermethylated |
| cg26537209 | 0.06565 | 0.243429189 | 1.890635 | 1.15E-05 | hypermethylated |
| cg14305278 | 0.07022 | 0.260288108 | 1.890155 | 6.57E-06 | hypermethylated |
| cg16768018 | 0.12304 | 0.456039459 | 1.890031 | 2.64E-06 | hypermethylated |
| cg14037665 | 0.08474 | 0.313855676 | 1.888986 | 1.31E-05 | hypermethylated |
| cg15908006 | 0.0627  | 0.232174595 | 1.888673 | 4.05E-05 | hypermethylated |
| cg17121178 | 0.07763 | 0.287383243 | 1.88829  | 1.02E-05 | hypermethylated |
| cg20014398 | 0.12223 | 0.452348649 | 1.887837 | 1.18E-05 | hypermethylated |
| cg06675190 | 0.10497 | 0.387994054 | 1.886057 | 2.51E-05 | hypermethylated |
| cg07382920 | 0.10685 | 0.394843784 | 1.885695 | 3.59E-06 | hypermethylated |
| cg11097433 | 0.11663 | 0.430811351 | 1.885117 | 1.50E-05 | hypermethylated |
| cg15680288 | 0.08117 | 0.299767568 | 1.884826 | 2.92E-05 | hypermethylated |
| cg10243196 | 0.08132 | 0.300312432 | 1.884782 | 8.52E-05 | hypermethylated |
| cg08318726 | 0.1042  | 0.384785405 | 1.884699 | 3.85E-05 | hypermethylated |
| cg21041775 | 0.08981 | 0.331635135 | 1.884649 | 1.84E-05 | hypermethylated |
| cg01048962 | 0.08225 | 0.303681081 | 1.884469 | 0.000287 | hypermethylated |
| cg09434193 | 0.09784 | 0.360903243 | 1.883116 | 3.81E-05 | hypermethylated |
| cg16935065 | 0.10545 | 0.388947568 | 1.883017 | 1.94E-05 | hypermethylated |
| cg23758305 | 0.09455 | 0.348715676 | 1.882902 | 5.43E-06 | hypermethylated |
| cg24073122 | 0.08342 | 0.307638378 | 1.88277  | 2.78E-05 | hypermethylated |
| cg21858380 | 0.0807  | 0.297501622 | 1.882257 | 5.58E-05 | hypermethylated |
| cg27467929 | 0.0843  | 0.310724865 | 1.882033 | 9.27E-05 | hypermethylated |
| cg06370771 | 0.08054 | 0.296841622 | 1.881916 | 1.75E-05 | hypermethylated |
| cg00340850 | 0.06955 | 0.256335135 | 1.881909 | 2.95E-06 | hypermethylated |
| cg20685897 | 0.06797 | 0.250487568 | 1.881769 | 2.61E-05 | hypermethylated |

|            |         |             |          |          |                 |
|------------|---------|-------------|----------|----------|-----------------|
| cg22125805 | 0.12512 | 0.461055135 | 1.881627 | 9.82E-06 | hypermethylated |
| cg00522018 | 0.07723 | 0.284542703 | 1.881412 | 7.83E-06 | hypermethylated |
| cg20510724 | 0.09376 | 0.345441622 | 1.881397 | 4.73E-06 | hypermethylated |
| cg04115680 | 0.12083 | 0.445138378 | 1.881275 | 4.82E-05 | hypermethylated |
| cg27353143 | 0.10608 | 0.390779459 | 1.881202 | 5.14E-06 | hypermethylated |
| cg08421685 | 0.07147 | 0.263272973 | 1.88115  | 0.00024  | hypermethylated |
| cg12159189 | 0.10024 | 0.36922     | 1.881022 | 1.35E-05 | hypermethylated |
| cg20271517 | 0.07916 | 0.291550811 | 1.880904 | 1.20E-05 | hypermethylated |
| cg16073378 | 0.10733 | 0.395281622 | 1.880827 | 1.04E-05 | hypermethylated |
| cg15301316 | 0.09765 | 0.359391351 | 1.879864 | 1.14E-05 | hypermethylated |
| cg21762788 | 0.10642 | 0.391608649 | 1.879643 | 6.93E-06 | hypermethylated |
| cg22473637 | 0.06942 | 0.255438378 | 1.879552 | 1.11E-05 | hypermethylated |
| cg11326255 | 0.08682 | 0.319436757 | 1.879431 | 6.54E-05 | hypermethylated |
| cg12838303 | 0.10629 | 0.391064324 | 1.8794   | 4.48E-06 | hypermethylated |
| cg20449685 | 0.09832 | 0.361645405 | 1.879019 | 9.07E-06 | hypermethylated |
| cg00848728 | 0.06264 | 0.230269189 | 1.878165 | 1.12E-05 | hypermethylated |
| cg03181248 | 0.10312 | 0.378955676 | 1.877705 | 2.21E-05 | hypermethylated |
| cg11946503 | 0.09097 | 0.334285946 | 1.87762  | 3.49E-06 | hypermethylated |
| cg13344169 | 0.06557 | 0.240917838 | 1.877433 | 0.000338 | hypermethylated |
| cg04495670 | 0.09442 | 0.346776757 | 1.876843 | 8.03E-05 | hypermethylated |
| cg18324707 | 0.10285 | 0.377703784 | 1.876713 | 3.67E-05 | hypermethylated |
| cg08125821 | 0.08393 | 0.30806     | 1.875953 | 1.23E-05 | hypermethylated |
| cg23141855 | 0.0775  | 0.284448108 | 1.875897 | 3.23E-05 | hypermethylated |
| cg23847712 | 0.12531 | 0.459728108 | 1.875279 | 2.95E-06 | hypermethylated |
| cg03243226 | 0.11781 | 0.432155135 | 1.875087 | 2.27E-05 | hypermethylated |
| cg22097425 | 0.09363 | 0.343443784 | 1.875031 | 6.57E-06 | hypermethylated |
| cg01689438 | 0.08857 | 0.324772432 | 1.874539 | 5.35E-06 | hypermethylated |
| cg10601582 | 0.11584 | 0.424756757 | 1.874503 | 6.93E-06 | hypermethylated |
| cg14730445 | 0.1034  | 0.379108108 | 1.874373 | 2.45E-05 | hypermethylated |
| cg08535373 | 0.09334 | 0.342076216 | 1.87375  | 5.43E-06 | hypermethylated |
| cg00939495 | 0.11594 | 0.424897838 | 1.873738 | 7.52E-06 | hypermethylated |
| cg08453021 | 0.07617 | 0.279043784 | 1.873197 | 4.64E-05 | hypermethylated |
| cg18335068 | 0.07837 | 0.287100541 | 1.873183 | 8.04E-06 | hypermethylated |
| cg11706835 | 0.05331 | 0.19526973  | 1.87299  | 3.85E-06 | hypermethylated |
| cg00344443 | 0.11232 | 0.411385405 | 1.872876 | 1.39E-05 | hypermethylated |
| cg05945059 | 0.09426 | 0.345194595 | 1.872692 | 1.31E-05 | hypermethylated |
| cg08572611 | 0.1163  | 0.425712973 | 1.87203  | 1.21E-05 | hypermethylated |
| cg09619271 | 0.08117 | 0.297048649 | 1.871681 | 0.000214 | hypermethylated |
| cg14270292 | 0.07458 | 0.27288     | 1.871406 | 6.15E-05 | hypermethylated |
| cg07160277 | 0.0723  | 0.264520541 | 1.871312 | 1.23E-05 | hypermethylated |
| cg23596233 | 0.10397 | 0.380163784 | 1.870454 | 3.49E-05 | hypermethylated |
| cg04017533 | 0.0772  | 0.282110811 | 1.869589 | 4.82E-05 | hypermethylated |
| cg05422029 | 0.10002 | 0.365497838 | 1.869574 | 2.79E-06 | hypermethylated |
| cg17554604 | 0.07604 | 0.27778     | 1.869112 | 0.001188 | hypermethylated |
| cg04902729 | 0.09726 | 0.355271351 | 1.869003 | 8.60E-06 | hypermethylated |
| cg14058383 | 0.0601  | 0.219379459 | 1.867992 | 6.39E-06 | hypermethylated |
| cg13784080 | 0.08188 | 0.298850811 | 1.867842 | 8.60E-06 | hypermethylated |
| cg11676902 | 0.06808 | 0.248474054 | 1.867792 | 0.000209 | hypermethylated |
| cg13390867 | 0.09547 | 0.348357838 | 1.867451 | 4.26E-05 | hypermethylated |
| cg11898486 | 0.07384 | 0.26942     | 1.867382 | 6.01E-05 | hypermethylated |
| cg04958794 | 0.08754 | 0.319309189 | 1.86694  | 3.90E-06 | hypermethylated |
| cg12560987 | 0.13066 | 0.47654     | 1.86678  | 2.36E-06 | hypermethylated |
| cg17633592 | 0.06016 | 0.219391351 | 1.86663  | 1.84E-05 | hypermethylated |
| cg27247697 | 0.08214 | 0.299537838 | 1.866581 | 6.38E-05 | hypermethylated |
| cg26990587 | 0.10868 | 0.396221622 | 1.866221 | 3.62E-05 | hypermethylated |
| cg24019371 | 0.07654 | 0.279026486 | 1.866116 | 4.26E-05 | hypermethylated |
| cg00824018 | 0.09785 | 0.356682162 | 1.865995 | 1.62E-05 | hypermethylated |
| cg03192598 | 0.10461 | 0.381271351 | 1.865797 | 0.000306 | hypermethylated |



|            |         |             |          |          |                 |
|------------|---------|-------------|----------|----------|-----------------|
| cg03495868 | 0.06233 | 0.227166486 | 1.865751 | 7.65E-05 | hypermethylated |
| cg12646649 | 0.11114 | 0.404798378 | 1.864825 | 2.92E-05 | hypermethylated |
| cg20387341 | 0.0674  | 0.245414054 | 1.864397 | 3.00E-05 | hypermethylated |
| cg13187764 | 0.09398 | 0.342180541 | 1.864332 | 5.73E-06 | hypermethylated |
| cg14062050 | 0.111   | 0.404125405 | 1.864243 | 2.79E-06 | hypermethylated |
| cg09772661 | 0.10244 | 0.37292973  | 1.864125 | 6.38E-05 | hypermethylated |
| cg11612786 | 0.07075 | 0.257551351 | 1.864058 | 1.17E-05 | hypermethylated |
| cg03072621 | 0.10838 | 0.394423243 | 1.863646 | 1.71E-05 | hypermethylated |
| cg27347290 | 0.07724 | 0.281071892 | 1.863519 | 4.82E-05 | hypermethylated |
| cg24937747 | 0.11092 | 0.403597838 | 1.863399 | 3.90E-06 | hypermethylated |
| cg19945554 | 0.09482 | 0.344998919 | 1.863329 | 8.42E-05 | hypermethylated |
| cg22130262 | 0.08655 | 0.314791351 | 1.86279  | 2.39E-05 | hypermethylated |
| cg10514097 | 0.09505 | 0.345612432 | 1.862397 | 2.32E-05 | hypermethylated |
| cg08602190 | 0.08098 | 0.294435135 | 1.862312 | 1.71E-05 | hypermethylated |
| cg08812189 | 0.10521 | 0.382475676 | 1.862096 | 3.39E-06 | hypermethylated |
| cg18534345 | 0.07723 | 0.280681622 | 1.861701 | 8.83E-06 | hypermethylated |
| cg19822251 | 0.08171 | 0.296951351 | 1.861642 | 1.80E-05 | hypermethylated |
| cg26590537 | 0.08918 | 0.324046486 | 1.861409 | 1.39E-05 | hypermethylated |
| cg27642554 | 0.07896 | 0.286685946 | 1.860277 | 3.62E-05 | hypermethylated |
| cg00589371 | 0.07285 | 0.264498378 | 1.860258 | 4.05E-05 | hypermethylated |
| cg08271804 | 0.09252 | 0.335882162 | 1.860118 | 3.69E-06 | hypermethylated |
| cg00018128 | 0.08564 | 0.310855135 | 1.859886 | 2.04E-05 | hypermethylated |
| cg04804618 | 0.09365 | 0.339888649 | 1.859711 | 3.15E-05 | hypermethylated |
| cg05210258 | 0.10305 | 0.373985946 | 1.85964  | 1.46E-05 | hypermethylated |
| cg08323651 | 0.07968 | 0.28909027  | 1.859231 | 1.71E-05 | hypermethylated |
| cg13465477 | 0.1013  | 0.367520541 | 1.859191 | 1.99E-05 | hypermethylated |
| cg22178613 | 0.09346 | 0.338976757 | 1.858765 | 2.45E-05 | hypermethylated |
| cg00548708 | 0.09136 | 0.331294595 | 1.85848  | 5.14E-06 | hypermethylated |
| cg14685796 | 0.07943 | 0.288001081 | 1.858318 | 1.89E-05 | hypermethylated |
| cg14400886 | 0.08143 | 0.295215135 | 1.858134 | 3.23E-05 | hypermethylated |
| cg13525197 | 0.07492 | 0.27156     | 1.857848 | 1.89E-05 | hypermethylated |
| cg10959353 | 0.09867 | 0.35759027  | 1.857624 | 1.46E-05 | hypermethylated |
| cg08776356 | 0.08543 | 0.309482703 | 1.857044 | 1.28E-05 | hypermethylated |
| cg07204280 | 0.08685 | 0.314576216 | 1.856812 | 0.000365 | hypermethylated |
| cg22299741 | 0.06436 | 0.233097838 | 1.856699 | 1.28E-05 | hypermethylated |
| cg12877723 | 0.10261 | 0.371555676 | 1.856407 | 3.69E-06 | hypermethylated |
| cg11659501 | 0.07435 | 0.269136757 | 1.855935 | 1.01E-05 | hypermethylated |
| cg25632105 | 0.07416 | 0.268418378 | 1.85577  | 1.62E-05 | hypermethylated |
| cg06369992 | 0.08961 | 0.324314054 | 1.85566  | 9.19E-06 | hypermethylated |
| cg09799658 | 0.0877  | 0.316926486 | 1.853499 | 1.21E-05 | hypermethylated |
| cg01486814 | 0.0736  | 0.265963784 | 1.853452 | 1.54E-05 | hypermethylated |
| cg03532926 | 0.13057 | 0.471721081 | 1.853111 | 1.42E-05 | hypermethylated |
| cg03964958 | 0.11111 | 0.401313514 | 1.852741 | 2.10E-06 | hypermethylated |
| cg06806958 | 0.09824 | 0.354824324 | 1.852722 | 2.39E-05 | hypermethylated |
| cg01284666 | 0.07728 | 0.279065405 | 1.852436 | 7.12E-05 | hypermethylated |
| cg09048251 | 0.1037  | 0.374453514 | 1.852371 | 2.21E-05 | hypermethylated |
| cg02561482 | 0.09958 | 0.359540541 | 1.852227 | 2.79E-06 | hypermethylated |
| cg19632594 | 0.05889 | 0.212618378 | 1.852172 | 3.81E-05 | hypermethylated |
| cg04201750 | 0.06185 | 0.223299459 | 1.852134 | 6.05E-06 | hypermethylated |
| cg00991875 | 0.12245 | 0.441975676 | 1.851774 | 1.15E-05 | hypermethylated |
| cg15183083 | 0.0806  | 0.290875676 | 1.851551 | 4.47E-05 | hypermethylated |
| cg15132673 | 0.06297 | 0.227166486 | 1.851013 | 0.000338 | hypermethylated |
| cg10058779 | 0.07091 | 0.255677297 | 1.850263 | 0.000132 | hypermethylated |
| cg04961466 | 0.09395 | 0.338738919 | 1.850209 | 1.15E-05 | hypermethylated |
| cg04227922 | 0.11801 | 0.425485405 | 1.850201 | 4.01E-06 | hypermethylated |
| cg05667348 | 0.1095  | 0.394753514 | 1.850021 | 7.32E-06 | hypermethylated |
| cg02864757 | 0.09004 | 0.32458973  | 1.849979 | 1.04E-05 | hypermethylated |
| cg18103859 | 0.10484 | 0.377908108 | 1.849846 | 0.000109 | hypermethylated |

|            |         |             |          |          |                 |
|------------|---------|-------------|----------|----------|-----------------|
| cg20778451 | 0.09089 | 0.327557297 | 1.849554 | 7.93E-06 | hypermethylated |
| cg27603283 | 0.07397 | 0.266563243 | 1.849466 | 8.42E-05 | hypermethylated |
| cg01939453 | 0.10676 | 0.384501081 | 1.848616 | 9.57E-06 | hypermethylated |
| cg19096825 | 0.10492 | 0.377869189 | 1.848597 | 1.06E-05 | hypermethylated |
| cg23683588 | 0.08839 | 0.318318378 | 1.848515 | 1.58E-05 | hypermethylated |
| cg05983315 | 0.13563 | 0.488319459 | 1.848149 | 6.05E-06 | hypermethylated |
| cg03610852 | 0.08884 | 0.319704324 | 1.847457 | 7.52E-06 | hypermethylated |
| cg08039116 | 0.10778 | 0.387797297 | 1.847213 | 4.73E-06 | hypermethylated |
| cg13843613 | 0.06713 | 0.241489189 | 1.846929 | 7.29E-05 | hypermethylated |
| cg05328547 | 0.08092 | 0.291054054 | 1.846719 | 7.12E-06 | hypermethylated |
| cg07592963 | 0.10665 | 0.38351027  | 1.846381 | 1.37E-05 | hypermethylated |
| cg04415176 | 0.12598 | 0.452985946 | 1.846272 | 1.15E-05 | hypermethylated |
| cg16876315 | 0.07133 | 0.256397838 | 1.845803 | 2.67E-05 | hypermethylated |
| cg10507508 | 0.09306 | 0.334394595 | 1.845318 | 5.86E-05 | hypermethylated |
| cg11359133 | 0.10013 | 0.359742162 | 1.845089 | 5.65E-06 | hypermethylated |
| cg14510359 | 0.07342 | 0.263755676 | 1.844957 | 9.05E-05 | hypermethylated |
| cg19792599 | 0.08628 | 0.309855676 | 1.844498 | 2.71E-05 | hypermethylated |
| cg26282384 | 0.10353 | 0.371703243 | 1.844102 | 4.80E-06 | hypermethylated |
| cg17714025 | 0.09141 | 0.328182703 | 1.844075 | 1.71E-05 | hypermethylated |
| cg10300684 | 0.11507 | 0.413074595 | 1.843891 | 1.04E-05 | hypermethylated |
| cg01354961 | 0.07148 | 0.256583784 | 1.843818 | 0.000358 | hypermethylated |
| cg27041794 | 0.07632 | 0.273932432 | 1.843687 | 0.000112 | hypermethylated |
| cg00885682 | 0.06391 | 0.229374054 | 1.843589 | 3.85E-06 | hypermethylated |
| cg20103758 | 0.087   | 0.312031351 | 1.842604 | 6.57E-06 | hypermethylated |
| cg00497967 | 0.06994 | 0.25082     | 1.842463 | 2.64E-05 | hypermethylated |
| cg25729445 | 0.08603 | 0.308466486 | 1.842202 | 8.26E-06 | hypermethylated |
| cg25950625 | 0.10316 | 0.369784865 | 1.841802 | 0.000245 | hypermethylated |
| cg03352106 | 0.15461 | 0.554197297 | 1.841766 | 1.13E-06 | hypermethylated |
| cg12791492 | 0.06243 | 0.223766486 | 1.841683 | 1.87E-05 | hypermethylated |
| cg09788416 | 0.09676 | 0.346661622 | 1.841045 | 2.10E-05 | hypermethylated |
| cg14508508 | 0.08973 | 0.321375135 | 1.840596 | 1.94E-05 | hypermethylated |
| cg27434509 | 0.12504 | 0.447788649 | 1.840428 | 4.58E-05 | hypermethylated |
| cg18723560 | 0.0868  | 0.310709189 | 1.839798 | 3.67E-05 | hypermethylated |
| cg19430967 | 0.08701 | 0.311414595 | 1.839583 | 4.36E-05 | hypermethylated |
| cg18267049 | 0.1034  | 0.369958378 | 1.839127 | 5.58E-05 | hypermethylated |
| cg07918545 | 0.12903 | 0.461465946 | 1.838518 | 5.73E-06 | hypermethylated |
| cg01427575 | 0.07947 | 0.284160541 | 1.838224 | 3.04E-05 | hypermethylated |
| cg07983905 | 0.09148 | 0.327094595 | 1.83818  | 0.000126 | hypermethylated |
| cg16413030 | 0.06194 | 0.221360541 | 1.837455 | 0.000126 | hypermethylated |
| cg25078444 | 0.1179  | 0.421216216 | 1.836997 | 1.89E-05 | hypermethylated |
| cg25517810 | 0.12924 | 0.461708108 | 1.836928 | 6.39E-06 | hypermethylated |
| cg11070069 | 0.09535 | 0.340530811 | 1.83648  | 6.57E-06 | hypermethylated |
| cg08701621 | 0.12287 | 0.438547568 | 1.835601 | 4.05E-05 | hypermethylated |
| cg11645631 | 0.07459 | 0.266221622 | 1.835574 | 5.58E-05 | hypermethylated |
| cg04738965 | 0.12551 | 0.44778973  | 1.835019 | 2.36E-06 | hypermethylated |
| cg04784672 | 0.10497 | 0.374286486 | 1.834166 | 3.39E-06 | hypermethylated |
| cg07536847 | 0.08085 | 0.288238378 | 1.833943 | 0.000116 | hypermethylated |
| cg01962676 | 0.07112 | 0.253522703 | 1.833788 | 5.31E-05 | hypermethylated |
| cg17922359 | 0.09384 | 0.334465946 | 1.833584 | 1.94E-05 | hypermethylated |
| cg01518607 | 0.1413  | 0.503602703 | 1.833525 | 8.10E-07 | hypermethylated |
| cg20670075 | 0.09987 | 0.355925946 | 1.833454 | 5.81E-06 | hypermethylated |
| cg26923490 | 0.09991 | 0.355876216 | 1.832675 | 1.04E-05 | hypermethylated |
| cg23665381 | 0.08654 | 0.308208108 | 1.832466 | 1.66E-05 | hypermethylated |
| cg02886522 | 0.06855 | 0.244132432 | 1.832435 | 9.38E-05 | hypermethylated |
| cg14976646 | 0.06716 | 0.239172973 | 1.83238  | 5.81E-06 | hypermethylated |
| cg08158952 | 0.11186 | 0.398354595 | 1.832359 | 3.30E-06 | hypermethylated |
| cg15285250 | 0.10998 | 0.391601081 | 1.832144 | 9.82E-06 | hypermethylated |
| cg13188011 | 0.06773 | 0.241100541 | 1.831768 | 6.14E-06 | hypermethylated |

|            |         |             |          |          |                 |
|------------|---------|-------------|----------|----------|-----------------|
| cg06022179 | 0.085   | 0.302507027 | 1.831434 | 1.50E-05 | hypermethylated |
| cg04584301 | 0.09365 | 0.333158919 | 1.83086  | 0.000277 | hypermethylated |
| cg10095242 | 0.08764 | 0.311745405 | 1.830707 | 0.000132 | hypermethylated |
| cg13944175 | 0.12901 | 0.458640541 | 1.829881 | 2.83E-06 | hypermethylated |
| cg09019936 | 0.07864 | 0.279509189 | 1.82956  | 3.81E-05 | hypermethylated |
| cg11321433 | 0.07169 | 0.254715135 | 1.829041 | 1.12E-05 | hypermethylated |
| cg26530498 | 0.09618 | 0.341522162 | 1.82817  | 4.12E-06 | hypermethylated |
| cg22861116 | 0.11496 | 0.408105946 | 1.827812 | 1.75E-05 | hypermethylated |
| cg17525406 | 0.10944 | 0.388484865 | 1.827718 | 2.51E-05 | hypermethylated |
| cg23805360 | 0.07281 | 0.258448649 | 1.827669 | 0.000123 | hypermethylated |
| cg06507579 | 0.11351 | 0.402885946 | 1.827552 | 6.22E-06 | hypermethylated |
| cg22881914 | 0.10749 | 0.381477297 | 1.827395 | 0.000884 | hypermethylated |
| cg10159630 | 0.09665 | 0.342991892 | 1.827333 | 9.31E-06 | hypermethylated |
| cg18273840 | 0.09791 | 0.347410811 | 1.827115 | 0.0003   | hypermethylated |
| cg23697546 | 0.1006  | 0.356945946 | 1.827075 | 6.15E-05 | hypermethylated |
| cg25285090 | 0.12307 | 0.436554595 | 1.826683 | 5.43E-06 | hypermethylated |
| cg02155658 | 0.08166 | 0.289510811 | 1.825916 | 5.19E-05 | hypermethylated |
| cg07681938 | 0.10657 | 0.377807027 | 1.825848 | 2.79E-06 | hypermethylated |
| cg08130144 | 0.06921 | 0.245345946 | 1.825765 | 2.39E-05 | hypermethylated |
| cg09492451 | 0.12143 | 0.430439459 | 1.825685 | 2.04E-05 | hypermethylated |
| cg20449590 | 0.128   | 0.453701622 | 1.8256   | 3.39E-06 | hypermethylated |
| cg08482436 | 0.11159 | 0.395530811 | 1.825582 | 2.71E-06 | hypermethylated |
| cg07831417 | 0.0736  | 0.260792973 | 1.825127 | 1.33E-05 | hypermethylated |
| cg19707040 | 0.08151 | 0.288735676 | 1.8247   | 8.42E-05 | hypermethylated |
| cg00800512 | 0.0986  | 0.34916     | 1.824229 | 1.62E-05 | hypermethylated |
| cg19651694 | 0.10504 | 0.371855676 | 1.823804 | 2.42E-06 | hypermethylated |
| cg24080247 | 0.10551 | 0.373461081 | 1.823578 | 1.18E-05 | hypermethylated |
| cg08160350 | 0.09235 | 0.326844865 | 1.823422 | 0.000154 | hypermethylated |
| cg18657094 | 0.10408 | 0.368342162 | 1.823354 | 8.95E-06 | hypermethylated |
| cg23244910 | 0.08926 | 0.315884324 | 1.823311 | 7.74E-05 | hypermethylated |
| cg19628148 | 0.10342 | 0.365993514 | 1.823303 | 2.07E-05 | hypermethylated |
| cg18243760 | 0.10494 | 0.371347568 | 1.823205 | 3.90E-05 | hypermethylated |
| cg19741167 | 0.10645 | 0.376617297 | 1.822923 | 6.57E-06 | hypermethylated |
| cg06062984 | 0.12709 | 0.449625405 | 1.822873 | 6.05E-06 | hypermethylated |
| cg19019849 | 0.0677  | 0.239466486 | 1.822596 | 1.28E-05 | hypermethylated |
| cg02093732 | 0.1016  | 0.359368649 | 1.822564 | 3.79E-06 | hypermethylated |
| cg03625287 | 0.10419 | 0.368479459 | 1.822367 | 7.41E-06 | hypermethylated |
| cg10390058 | 0.08466 | 0.299283243 | 1.821759 | 1.52E-05 | hypermethylated |
| cg07850527 | 0.131   | 0.462961622 | 1.821326 | 0.0002   | hypermethylated |
| cg14676407 | 0.08136 | 0.287496216 | 1.821151 | 9.82E-06 | hypermethylated |
| cg22797031 | 0.17841 | 0.630378919 | 1.821023 | 2.79E-06 | hypermethylated |
| cg05255275 | 0.09828 | 0.347212432 | 1.820849 | 4.36E-06 | hypermethylated |
| cg20881910 | 0.08148 | 0.287857297 | 1.820836 | 3.95E-05 | hypermethylated |
| cg22983083 | 0.0949  | 0.335264324 | 1.820819 | 1.39E-05 | hypermethylated |
| cg21292008 | 0.07904 | 0.279174054 | 1.82051  | 7.65E-05 | hypermethylated |
| cg19677607 | 0.07126 | 0.251672973 | 1.820386 | 6.78E-05 | hypermethylated |
| cg14035771 | 0.06502 | 0.229623784 | 1.820317 | 4.26E-05 | hypermethylated |
| cg14523847 | 0.13453 | 0.474844324 | 1.819527 | 7.72E-06 | hypermethylated |
| cg22336004 | 0.08645 | 0.305134595 | 1.819508 | 3.76E-05 | hypermethylated |
| cg02072400 | 0.06797 | 0.239877838 | 1.81933  | 7.84E-05 | hypermethylated |
| cg21099470 | 0.10049 | 0.354576757 | 1.819046 | 3.39E-06 | hypermethylated |
| cg04980590 | 0.08756 | 0.308945946 | 1.819011 | 2.95E-06 | hypermethylated |
| cg01939562 | 0.1049  | 0.37006973  | 1.818782 | 5.58E-06 | hypermethylated |
| cg14531663 | 0.10604 | 0.373984324 | 1.818369 | 9.07E-06 | hypermethylated |
| cg00491180 | 0.08348 | 0.294418919 | 1.818368 | 8.03E-05 | hypermethylated |
| cg07636117 | 0.08548 | 0.301393514 | 1.81799  | 7.65E-05 | hypermethylated |
| cg07104660 | 0.07085 | 0.249800541 | 1.817937 | 1.25E-05 | hypermethylated |
| cg04279973 | 0.0904  | 0.318675676 | 1.817694 | 3.23E-05 | hypermethylated |

|            |         |             |          |          |                 |
|------------|---------|-------------|----------|----------|-----------------|
| cg05099387 | 0.11137 | 0.392498378 | 1.817326 | 0.000563 | hypermethylated |
| cg25903158 | 0.07001 | 0.246711892 | 1.817194 | 0.000107 | hypermethylated |
| cg11965370 | 0.09191 | 0.323756757 | 1.816617 | 1.35E-05 | hypermethylated |
| cg04838147 | 0.08092 | 0.285000541 | 1.816396 | 2.96E-05 | hypermethylated |
| cg20121142 | 0.08388 | 0.295348649 | 1.81602  | 1.26E-05 | hypermethylated |
| cg13628577 | 0.11542 | 0.406204865 | 1.815314 | 7.52E-06 | hypermethylated |
| cg10732215 | 0.12348 | 0.434532973 | 1.815188 | 0.000575 | hypermethylated |
| cg00618450 | 0.09214 | 0.324125946 | 1.814655 | 2.13E-05 | hypermethylated |
| cg01049205 | 0.07358 | 0.258831892 | 1.81463  | 2.85E-05 | hypermethylated |
| cg23442672 | 0.09088 | 0.319664324 | 1.814523 | 2.04E-05 | hypermethylated |
| cg04514249 | 0.09333 | 0.328144865 | 1.81392  | 4.47E-05 | hypermethylated |
| cg06122871 | 0.11993 | 0.421645405 | 1.813838 | 2.79E-06 | hypermethylated |
| cg01618130 | 0.08976 | 0.315442703 | 1.813233 | 2.42E-05 | hypermethylated |
| cg02432280 | 0.10663 | 0.374723784 | 1.813214 | 9.57E-06 | hypermethylated |
| cg08676975 | 0.1039  | 0.365062703 | 1.812949 | 1.18E-05 | hypermethylated |
| cg11996428 | 0.09259 | 0.325315135 | 1.81291  | 2.74E-05 | hypermethylated |
| cg27005794 | 0.10453 | 0.367225946 | 1.812751 | 9.27E-05 | hypermethylated |
| cg01664666 | 0.0867  | 0.304541622 | 1.812536 | 8.42E-05 | hypermethylated |
| cg17495719 | 0.07824 | 0.274792973 | 1.812367 | 0.000123 | hypermethylated |
| cg10366093 | 0.09742 | 0.342143243 | 1.812311 | 2.10E-05 | hypermethylated |
| cg04671611 | 0.11288 | 0.396392432 | 1.81214  | 6.66E-06 | hypermethylated |
| cg01046104 | 0.10771 | 0.378151892 | 1.811814 | 4.70E-05 | hypermethylated |
| cg07477792 | 0.06727 | 0.236151351 | 1.811677 | 7.12E-05 | hypermethylated |
| cg26024843 | 0.09971 | 0.349957297 | 1.811369 | 1.66E-05 | hypermethylated |
| cg11277087 | 0.09919 | 0.348127027 | 1.811347 | 2.13E-06 | hypermethylated |
| cg18106312 | 0.0969  | 0.340047568 | 1.811168 | 3.95E-05 | hypermethylated |
| cg17840719 | 0.12574 | 0.441210811 | 1.811024 | 1.71E-05 | hypermethylated |
| cg09222749 | 0.08083 | 0.28360973  | 1.810944 | 1.44E-05 | hypermethylated |
| cg13358636 | 0.10915 | 0.382925405 | 1.810751 | 1.09E-05 | hypermethylated |
| cg27606499 | 0.11533 | 0.404557838 | 1.810578 | 3.69E-06 | hypermethylated |
| cg02530022 | 0.11687 | 0.409942703 | 1.810518 | 1.82E-06 | hypermethylated |
| cg11642106 | 0.12042 | 0.422327027 | 1.810286 | 1.99E-05 | hypermethylated |
| cg01916088 | 0.12001 | 0.420876757 | 1.810243 | 2.15E-05 | hypermethylated |
| cg02991338 | 0.0817  | 0.286462162 | 1.809937 | 1.35E-05 | hypermethylated |
| cg04774711 | 0.08245 | 0.289069189 | 1.809823 | 1.46E-05 | hypermethylated |
| cg21459340 | 0.11413 | 0.400083784 | 1.809624 | 5.00E-06 | hypermethylated |
| cg09524907 | 0.1211  | 0.424440541 | 1.809364 | 1.80E-05 | hypermethylated |
| cg12180703 | 0.12464 | 0.436834595 | 1.80932  | 1.04E-05 | hypermethylated |
| cg17283453 | 0.10763 | 0.377214054 | 1.809303 | 3.21E-06 | hypermethylated |
| cg27278953 | 0.0788  | 0.276037297 | 1.808596 | 1.28E-05 | hypermethylated |
| cg20754261 | 0.0986  | 0.345387027 | 1.808554 | 1.44E-05 | hypermethylated |
| cg06617456 | 0.1008  | 0.352984865 | 1.808111 | 6.62E-05 | hypermethylated |
| cg24863335 | 0.09794 | 0.342969189 | 1.808109 | 8.83E-06 | hypermethylated |
| cg17241776 | 0.12847 | 0.449815135 | 1.807901 | 6.66E-06 | hypermethylated |
| cg18343437 | 0.11432 | 0.400176216 | 1.807558 | 7.72E-06 | hypermethylated |
| cg19714279 | 0.08025 | 0.280893514 | 1.80745  | 2.32E-05 | hypermethylated |
| cg02914422 | 0.09648 | 0.337678378 | 1.807348 | 8.63E-05 | hypermethylated |
| cg22634378 | 0.08265 | 0.289232973 | 1.807145 | 0.000195 | hypermethylated |
| cg09693004 | 0.0593  | 0.20746     | 1.806729 | 5.28E-06 | hypermethylated |
| cg08605326 | 0.10894 | 0.38104     | 1.806409 | 4.15E-05 | hypermethylated |
| cg12764034 | 0.1238  | 0.432961081 | 1.806226 | 5.00E-06 | hypermethylated |
| cg24104241 | 0.08623 | 0.301531351 | 1.806046 | 9.31E-06 | hypermethylated |
| cg04141813 | 0.08261 | 0.288862703 | 1.805996 | 0.000313 | hypermethylated |
| cg01944044 | 0.08013 | 0.280187568 | 1.805979 | 3.00E-05 | hypermethylated |
| cg03609960 | 0.1125  | 0.393346486 | 1.805876 | 1.42E-05 | hypermethylated |
| cg23505303 | 0.07255 | 0.253630811 | 1.805682 | 1.39E-05 | hypermethylated |
| cg27318318 | 0.05254 | 0.183665405 | 1.805592 | 1.31E-05 | hypermethylated |
| cg00480389 | 0.08989 | 0.314225946 | 1.80557  | 1.18E-05 | hypermethylated |

|            |         |             |          |          |                 |
|------------|---------|-------------|----------|----------|-----------------|
| cg09054633 | 0.11797 | 0.412328649 | 1.805375 | 3.59E-06 | hypermethylated |
| cg10524033 | 0.08668 | 0.302921622 | 1.805173 | 4.36E-05 | hypermethylated |
| cg12754421 | 0.11527 | 0.402826486 | 1.805141 | 1.14E-05 | hypermethylated |
| cg22891500 | 0.08331 | 0.291041622 | 1.804664 | 5.32E-05 | hypermethylated |
| cg08319991 | 0.10041 | 0.35071027  | 1.804377 | 0.000142 | hypermethylated |
| cg12212311 | 0.11506 | 0.401841081 | 1.804239 | 3.90E-06 | hypermethylated |
| cg13454407 | 0.07114 | 0.248358378 | 1.803691 | 8.42E-05 | hypermethylated |
| cg23726526 | 0.07007 | 0.244515135 | 1.803055 | 0.000123 | hypermethylated |
| cg24234899 | 0.09482 | 0.330871892 | 1.803009 | 0.000335 | hypermethylated |
| cg11557636 | 0.08982 | 0.313387568 | 1.802839 | 7.29E-05 | hypermethylated |
| cg20375342 | 0.08015 | 0.279577297 | 1.802473 | 6.01E-05 | hypermethylated |
| cg06288154 | 0.06099 | 0.212675135 | 1.802007 | 0.000354 | hypermethylated |
| cg14419975 | 0.11618 | 0.404961081 | 1.801422 | 0.000268 | hypermethylated |
| cg25017620 | 0.10194 | 0.355230811 | 1.801036 | 1.39E-05 | hypermethylated |
| cg14638883 | 0.09147 | 0.318598378 | 1.800368 | 0.000313 | hypermethylated |
| cg05522774 | 0.08406 | 0.292769189 | 1.800272 | 0.00017  | hypermethylated |
| cg14991487 | 0.10257 | 0.357197838 | 1.800115 | 2.32E-06 | hypermethylated |
| cg17384889 | 0.07709 | 0.268283784 | 1.799144 | 2.42E-06 | hypermethylated |
| cg26263234 | 0.11628 | 0.404651351 | 1.799076 | 1.33E-05 | hypermethylated |
| cg08806153 | 0.05908 | 0.20558     | 1.798958 | 1.73E-05 | hypermethylated |
| cg17305181 | 0.07278 | 0.253187027 | 1.79859  | 4.88E-05 | hypermethylated |
| cg11651237 | 0.10038 | 0.349132973 | 1.798305 | 3.32E-05 | hypermethylated |
| cg19370054 | 0.09877 | 0.343436216 | 1.797897 | 5.28E-06 | hypermethylated |
| cg14526718 | 0.09544 | 0.331796216 | 1.797631 | 3.40E-05 | hypermethylated |
| cg20406460 | 0.10579 | 0.367751351 | 1.797527 | 5.58E-06 | hypermethylated |
| cg27630311 | 0.06287 | 0.218536216 | 1.797429 | 0.000234 | hypermethylated |
| cg23475625 | 0.0837  | 0.290771351 | 1.796586 | 2.30E-05 | hypermethylated |
| cg13834623 | 0.07642 | 0.265427568 | 1.796296 | 0.000174 | hypermethylated |
| cg02878244 | 0.12201 | 0.423699459 | 1.796042 | 8.15E-06 | hypermethylated |
| cg17713613 | 0.10321 | 0.358367568 | 1.795857 | 4.80E-06 | hypermethylated |
| cg20113824 | 0.11323 | 0.392916757 | 1.794967 | 2.60E-06 | hypermethylated |
| cg18018027 | 0.06797 | 0.235842162 | 1.794852 | 9.57E-06 | hypermethylated |
| cg26984343 | 0.07811 | 0.270985946 | 1.794639 | 1.31E-05 | hypermethylated |
| cg15768103 | 0.10665 | 0.3699      | 1.794251 | 1.42E-05 | hypermethylated |
| cg12128017 | 0.08651 | 0.299982703 | 1.793941 | 5.58E-05 | hypermethylated |
| cg07675169 | 0.06907 | 0.239457297 | 1.793637 | 1.62E-05 | hypermethylated |
| cg05181041 | 0.10402 | 0.360519459 | 1.793216 | 1.46E-05 | hypermethylated |
| cg26035366 | 0.09598 | 0.332638919 | 1.793151 | 2.92E-05 | hypermethylated |
| cg05680531 | 0.07839 | 0.271635676 | 1.792931 | 9.27E-05 | hypermethylated |
| cg22367191 | 0.1031  | 0.357077297 | 1.792192 | 1.93E-06 | hypermethylated |
| cg07291445 | 0.11233 | 0.389017838 | 1.792093 | 4.42E-06 | hypermethylated |
| cg19922137 | 0.13114 | 0.454135676 | 1.792016 | 7.42E-06 | hypermethylated |
| cg06274159 | 0.12238 | 0.423755676 | 1.791865 | 3.07E-05 | hypermethylated |
| cg12133498 | 0.09308 | 0.322295135 | 1.791839 | 4.86E-06 | hypermethylated |
| cg21054521 | 0.11649 | 0.40328     | 1.791576 | 1.09E-05 | hypermethylated |
| cg24042242 | 0.10918 | 0.377895676 | 1.791279 | 3.40E-05 | hypermethylated |
| cg00074145 | 0.11755 | 0.406861622 | 1.791264 | 4.36E-05 | hypermethylated |
| cg11016563 | 0.07793 | 0.269667568 | 1.790931 | 3.04E-05 | hypermethylated |
| cg00017221 | 0.1054  | 0.364644865 | 1.790617 | 8.22E-05 | hypermethylated |
| cg10067970 | 0.094   | 0.325201622 | 1.790602 | 0.000132 | hypermethylated |
| cg27167224 | 0.06271 | 0.216936216 | 1.790503 | 0.000115 | hypermethylated |
| cg09516476 | 0.0749  | 0.259082703 | 1.790375 | 7.72E-06 | hypermethylated |
| cg00379720 | 0.12107 | 0.418741081 | 1.790217 | 1.12E-05 | hypermethylated |
| cg06808751 | 0.09848 | 0.340552432 | 1.789974 | 0.000193 | hypermethylated |
| cg06658468 | 0.10178 | 0.35184     | 1.789465 | 3.00E-05 | hypermethylated |
| cg01972418 | 0.10561 | 0.364956216 | 1.788977 | 1.04E-05 | hypermethylated |
| cg13952556 | 0.07212 | 0.249220541 | 1.788952 | 1.21E-05 | hypermethylated |
| cg14979301 | 0.1061  | 0.36664     | 1.78894  | 0.000102 | hypermethylated |

|            |         |             |          |          |                 |
|------------|---------|-------------|----------|----------|-----------------|
| cg21699044 | 0.10866 | 0.37545027  | 1.788801 | 6.05E-06 | hypermethylated |
| cg12595013 | 0.11669 | 0.403176216 | 1.78873  | 2.29E-06 | hypermethylated |
| cg10486998 | 0.08426 | 0.29108     | 1.788496 | 3.67E-05 | hypermethylated |
| cg05369857 | 0.12839 | 0.443482703 | 1.788345 | 4.94E-05 | hypermethylated |
| cg07183447 | 0.07572 | 0.26153027  | 1.788232 | 4.36E-06 | hypermethylated |
| cg11147786 | 0.06986 | 0.241277838 | 1.788157 | 3.04E-06 | hypermethylated |
| cg11384848 | 0.08128 | 0.2806      | 1.787543 | 2.61E-05 | hypermethylated |
| cg13824555 | 0.06334 | 0.218641622 | 1.787379 | 2.54E-05 | hypermethylated |
| cg14384532 | 0.11255 | 0.388508108 | 1.787379 | 6.05E-06 | hypermethylated |
| cg02954212 | 0.08232 | 0.284065946 | 1.786911 | 0.000293 | hypermethylated |
| cg00024280 | 0.07914 | 0.272994595 | 1.786393 | 2.85E-05 | hypermethylated |
| cg02019774 | 0.07303 | 0.251902703 | 1.786305 | 6.01E-05 | hypermethylated |
| cg23695133 | 0.10648 | 0.36718973  | 1.785943 | 5.06E-05 | hypermethylated |
| cg02266732 | 0.08522 | 0.293872432 | 1.785926 | 4.24E-06 | hypermethylated |
| cg04763554 | 0.09927 | 0.342188649 | 1.785362 | 0.000142 | hypermethylated |
| cg02937674 | 0.08495 | 0.292815676 | 1.785307 | 3.95E-05 | hypermethylated |
| cg03012170 | 0.05331 | 0.183678919 | 1.784708 | 7.65E-05 | hypermethylated |
| cg02119792 | 0.1453  | 0.500422703 | 1.784113 | 1.54E-05 | hypermethylated |
| cg19269666 | 0.07852 | 0.270418378 | 1.784061 | 4.31E-05 | hypermethylated |
| cg03730428 | 0.11811 | 0.406722162 | 1.783912 | 1.39E-05 | hypermethylated |
| cg07733257 | 0.09903 | 0.341010811 | 1.78388  | 2.32E-05 | hypermethylated |
| cg09420439 | 0.09653 | 0.332310811 | 1.783484 | 0.000725 | hypermethylated |
| cg13519035 | 0.11779 | 0.405431351 | 1.783241 | 2.21E-05 | hypermethylated |
| cg07573727 | 0.10059 | 0.346152973 | 1.782923 | 0.000195 | hypermethylated |
| cg23348270 | 0.12215 | 0.420117838 | 1.78214  | 1.39E-05 | hypermethylated |
| cg07651242 | 0.08975 | 0.308634054 | 1.781913 | 8.63E-05 | hypermethylated |
| cg24892966 | 0.11295 | 0.388396216 | 1.781845 | 1.31E-05 | hypermethylated |
| cg17987176 | 0.08897 | 0.305927568 | 1.781799 | 6.13E-06 | hypermethylated |
| cg22876812 | 0.09618 | 0.330593514 | 1.78125  | 8.63E-05 | hypermethylated |
| cg06201642 | 0.06974 | 0.23968973  | 1.78111  | 6.62E-05 | hypermethylated |
| cg03882242 | 0.11355 | 0.390073514 | 1.780418 | 1.73E-05 | hypermethylated |
| cg05327864 | 0.09783 | 0.335958378 | 1.779934 | 2.48E-05 | hypermethylated |
| cg26836233 | 0.10265 | 0.352431892 | 1.779611 | 8.83E-06 | hypermethylated |
| cg01082843 | 0.07983 | 0.274028649 | 1.779324 | 9.49E-05 | hypermethylated |
| cg10836101 | 0.10369 | 0.355523243 | 1.777667 | 8.37E-06 | hypermethylated |
| cg13974192 | 0.12675 | 0.434545946 | 1.777523 | 2.64E-06 | hypermethylated |
| cg11980129 | 0.09134 | 0.313130811 | 1.777447 | 1.66E-05 | hypermethylated |
| cg25514273 | 0.11088 | 0.380061622 | 1.777234 | 1.54E-05 | hypermethylated |
| cg05031521 | 0.07695 | 0.263615135 | 1.77644  | 0.00032  | hypermethylated |
| cg05864326 | 0.12356 | 0.423247027 | 1.776288 | 1.56E-05 | hypermethylated |
| cg18290624 | 0.10128 | 0.346798919 | 1.77575  | 9.96E-06 | hypermethylated |
| cg24845274 | 0.06343 | 0.217191892 | 1.775733 | 1.11E-05 | hypermethylated |
| cg03738025 | 0.14754 | 0.505092973 | 1.775443 | 3.12E-06 | hypermethylated |
| cg21384645 | 0.06728 | 0.230300541 | 1.775268 | 5.72E-05 | hypermethylated |
| cg01627823 | 0.11301 | 0.38682973  | 1.775248 | 3.15E-05 | hypermethylated |
| cg01388649 | 0.07837 | 0.26804     | 1.774075 | 3.15E-05 | hypermethylated |
| cg09968620 | 0.07672 | 0.262229189 | 1.773154 | 1.23E-05 | hypermethylated |
| cg02986266 | 0.08538 | 0.291809189 | 1.773055 | 1.02E-05 | hypermethylated |
| cg17371081 | 0.12709 | 0.434349189 | 1.773005 | 3.85E-05 | hypermethylated |
| cg16494192 | 0.10306 | 0.352129189 | 1.77262  | 4.86E-06 | hypermethylated |
| cg07150062 | 0.11677 | 0.398783243 | 1.771935 | 1.71E-05 | hypermethylated |
| cg22289434 | 0.08816 | 0.301029189 | 1.771707 | 9.07E-06 | hypermethylated |
| cg06619938 | 0.06383 | 0.217945946 | 1.771664 | 5.45E-05 | hypermethylated |
| cg13612083 | 0.05231 | 0.178488649 | 1.770674 | 7.38E-05 | hypermethylated |
| cg09418063 | 0.08776 | 0.299404865 | 1.770462 | 0.00012  | hypermethylated |
| cg16332936 | 0.06877 | 0.234555135 | 1.770076 | 0.000137 | hypermethylated |
| cg09515953 | 0.10323 | 0.352004324 | 1.769731 | 3.90E-05 | hypermethylated |
| cg24978630 | 0.09792 | 0.333783784 | 1.769238 | 1.94E-05 | hypermethylated |

|            |         |             |          |          |                 |
|------------|---------|-------------|----------|----------|-----------------|
| cg03699182 | 0.10415 | 0.35492     | 1.768831 | 0.001684 | hypermethylated |
| cg05669418 | 0.0733  | 0.249735135 | 1.768514 | 8.15E-06 | hypermethylated |
| cg18877506 | 0.0957  | 0.325966486 | 1.768133 | 7.72E-06 | hypermethylated |
| cg09382096 | 0.07913 | 0.269511892 | 1.768052 | 1.94E-05 | hypermethylated |
| cg20585869 | 0.07716 | 0.26276973  | 1.767874 | 3.00E-05 | hypermethylated |
| cg23097534 | 0.08293 | 0.282371351 | 1.767628 | 4.82E-05 | hypermethylated |
| cg00332021 | 0.07598 | 0.258619459 | 1.767139 | 2.10E-05 | hypermethylated |
| cg26344227 | 0.13696 | 0.46606     | 1.766761 | 9.57E-06 | hypermethylated |
| cg21899596 | 0.16172 | 0.550252432 | 1.766596 | 4.01E-06 | hypermethylated |
| cg26925231 | 0.10494 | 0.35690973  | 1.765995 | 1.46E-05 | hypermethylated |
| cg26104297 | 0.0891  | 0.302869189 | 1.765197 | 9.07E-06 | hypermethylated |
| cg15427886 | 0.13854 | 0.47082973  | 1.764903 | 3.79E-06 | hypermethylated |
| cg07960450 | 0.08319 | 0.282683243 | 1.764704 | 0.0002   | hypermethylated |
| cg04453180 | 0.08488 | 0.288352973 | 1.764339 | 8.52E-05 | hypermethylated |
| cg16529477 | 0.13599 | 0.461954054 | 1.764249 | 5.43E-06 | hypermethylated |
| cg07197785 | 0.12132 | 0.412062162 | 1.764045 | 4.05E-05 | hypermethylated |
| cg04062391 | 0.08199 | 0.278438919 | 1.763841 | 2.21E-05 | hypermethylated |
| cg15950068 | 0.10341 | 0.351131892 | 1.763637 | 4.10E-05 | hypermethylated |
| cg12306195 | 0.09609 | 0.326244865 | 1.763497 | 7.12E-06 | hypermethylated |
| cg26701242 | 0.09086 | 0.308438919 | 1.763268 | 4.24E-06 | hypermethylated |
| cg04131898 | 0.10686 | 0.362742162 | 1.763223 | 9.57E-06 | hypermethylated |
| cg10056132 | 0.09777 | 0.331816757 | 1.762923 | 8.37E-06 | hypermethylated |
| cg20649017 | 0.10997 | 0.372882703 | 1.761612 | 3.53E-05 | hypermethylated |
| cg02578368 | 0.09543 | 0.323580541 | 1.76161  | 0.003773 | hypermethylated |
| cg26468007 | 0.08727 | 0.295884865 | 1.761478 | 8.73E-05 | hypermethylated |
| cg08034077 | 0.10505 | 0.356158919 | 1.761445 | 2.32E-05 | hypermethylated |
| cg04773818 | 0.11479 | 0.38913027  | 1.761256 | 0.000113 | hypermethylated |
| cg25684999 | 0.12173 | 0.412578919 | 1.760985 | 9.57E-06 | hypermethylated |
| cg07246273 | 0.12097 | 0.409923784 | 1.760706 | 4.60E-06 | hypermethylated |
| cg22620221 | 0.12453 | 0.421937838 | 1.760537 | 6.75E-06 | hypermethylated |
| cg17486097 | 0.09815 | 0.332474054 | 1.760182 | 1.37E-05 | hypermethylated |
| cg00209038 | 0.10138 | 0.343263243 | 1.759542 | 0.000109 | hypermethylated |
| cg17336584 | 0.091   | 0.308058378 | 1.759265 | 2.85E-05 | hypermethylated |
| cg14750277 | 0.09639 | 0.326277838 | 1.759146 | 9.49E-05 | hypermethylated |
| cg26124318 | 0.08697 | 0.29439027  | 1.75914  | 0.000124 | hypermethylated |
| cg11877129 | 0.09001 | 0.304669189 | 1.759086 | 1.75E-05 | hypermethylated |
| cg18587340 | 0.08436 | 0.285461081 | 1.758663 | 2.92E-05 | hypermethylated |
| cg16459364 | 0.09768 | 0.330317297 | 1.757717 | 6.75E-06 | hypermethylated |
| cg19811761 | 0.09747 | 0.329578378 | 1.757591 | 7.29E-05 | hypermethylated |
| cg12122146 | 0.13836 | 0.467716216 | 1.757207 | 9.19E-06 | hypermethylated |
| cg14442421 | 0.07663 | 0.259016216 | 1.757061 | 1.94E-05 | hypermethylated |
| cg18217632 | 0.06118 | 0.206788108 | 1.757021 | 1.75E-05 | hypermethylated |
| cg06793562 | 0.1155  | 0.390314595 | 1.756745 | 1.27E-06 | hypermethylated |
| cg14823763 | 0.06997 | 0.236441622 | 1.756676 | 4.24E-06 | hypermethylated |
| cg22837767 | 0.09546 | 0.322540541 | 1.756512 | 5.65E-05 | hypermethylated |
| cg19993589 | 0.08374 | 0.282931351 | 1.756463 | 3.67E-05 | hypermethylated |
| cg15874092 | 0.1163  | 0.392848649 | 1.756123 | 1.75E-05 | hypermethylated |
| cg17123690 | 0.11995 | 0.405141081 | 1.755991 | 8.10E-07 | hypermethylated |
| cg19760241 | 0.15645 | 0.528302703 | 1.755663 | 1.54E-06 | hypermethylated |
| cg08826251 | 0.08949 | 0.302182703 | 1.755623 | 6.86E-05 | hypermethylated |
| cg17796010 | 0.08373 | 0.282626486 | 1.75508  | 2.51E-05 | hypermethylated |
| cg12307484 | 0.13534 | 0.456814595 | 1.75502  | 3.12E-06 | hypermethylated |
| cg11412466 | 0.07907 | 0.266860541 | 1.754884 | 2.13E-05 | hypermethylated |
| cg02091605 | 0.10258 | 0.346192432 | 1.754825 | 2.92E-05 | hypermethylated |
| cg00235367 | 0.08429 | 0.284322162 | 1.754093 | 1.05E-05 | hypermethylated |
| cg13954457 | 0.12043 | 0.406114054 | 1.75369  | 3.23E-05 | hypermethylated |
| cg09913956 | 0.07604 | 0.256247027 | 1.752705 | 1.84E-05 | hypermethylated |
| cg12591770 | 0.09357 | 0.315311351 | 1.752659 | 4.36E-06 | hypermethylated |

|            |         |             |          |          |                 |
|------------|---------|-------------|----------|----------|-----------------|
| cg06991300 | 0.12059 | 0.406166486 | 1.751961 | 2.81E-05 | hypermethylated |
| cg02348151 | 0.08038 | 0.270669189 | 1.751622 | 3.32E-05 | hypermethylated |
| cg13117164 | 0.08755 | 0.294677297 | 1.750957 | 5.25E-05 | hypermethylated |
| cg10996058 | 0.07564 | 0.254565405 | 1.750815 | 0.000159 | hypermethylated |
| cg09797337 | 0.13042 | 0.438918378 | 1.750788 | 2.79E-06 | hypermethylated |
| cg01775414 | 0.08581 | 0.288777297 | 1.75074  | 0.000112 | hypermethylated |
| cg20168230 | 0.11441 | 0.385002162 | 1.750653 | 9.07E-06 | hypermethylated |
| cg03229780 | 0.12066 | 0.405976216 | 1.750448 | 5.00E-06 | hypermethylated |
| cg16711792 | 0.10749 | 0.361580541 | 1.750115 | 2.32E-05 | hypermethylated |
| cg09477453 | 0.08801 | 0.296016216 | 1.749937 | 7.72E-06 | hypermethylated |
| cg16018474 | 0.09103 | 0.306172973 | 1.749933 | 4.36E-05 | hypermethylated |
| cg07788369 | 0.12685 | 0.426629189 | 1.749859 | 1.67E-06 | hypermethylated |
| cg13842237 | 0.07364 | 0.247553514 | 1.749179 | 8.95E-06 | hypermethylated |
| cg07800665 | 0.12425 | 0.417623243 | 1.748956 | 1.50E-05 | hypermethylated |
| cg24856726 | 0.11519 | 0.38694973  | 1.748131 | 1.58E-05 | hypermethylated |
| cg26132320 | 0.12041 | 0.404337838 | 1.747606 | 1.25E-05 | hypermethylated |
| cg17910121 | 0.10899 | 0.365969189 | 1.747526 | 2.85E-05 | hypermethylated |
| cg18468354 | 0.13361 | 0.448561081 | 1.747276 | 5.14E-06 | hypermethylated |
| cg18148997 | 0.07    | 0.234990811 | 1.747178 | 3.95E-05 | hypermethylated |
| cg07217924 | 0.06835 | 0.229407027 | 1.746896 | 1.97E-05 | hypermethylated |
| cg10791959 | 0.11932 | 0.400445405 | 1.74677  | 1.37E-05 | hypermethylated |
| cg01818151 | 0.07164 | 0.240416757 | 1.7467   | 1.77E-05 | hypermethylated |
| cg26239984 | 0.09524 | 0.319589189 | 1.746579 | 1.64E-05 | hypermethylated |
| cg25478600 | 0.07635 | 0.256121622 | 1.746129 | 1.04E-05 | hypermethylated |
| cg05438320 | 0.09391 | 0.315001622 | 1.746009 | 6.01E-05 | hypermethylated |
| cg21433231 | 0.0925  | 0.310202162 | 1.745683 | 5.58E-06 | hypermethylated |
| cg07850592 | 0.0739  | 0.247775676 | 1.745388 | 5.79E-05 | hypermethylated |
| cg14845689 | 0.07869 | 0.263779459 | 1.74508  | 6.39E-06 | hypermethylated |
| cg15161394 | 0.07865 | 0.263572432 | 1.744681 | 1.29E-06 | hypermethylated |
| cg04224064 | 0.1499  | 0.502328108 | 1.74463  | 2.36E-06 | hypermethylated |
| cg04223420 | 0.13514 | 0.452783784 | 1.744368 | 3.54E-06 | hypermethylated |
| cg22572159 | 0.09781 | 0.327543784 | 1.743634 | 9.95E-05 | hypermethylated |
| cg07744841 | 0.10031 | 0.335906486 | 1.743594 | 3.36E-05 | hypermethylated |
| cg21776417 | 0.09665 | 0.323555135 | 1.74317  | 1.89E-05 | hypermethylated |
| cg11235498 | 0.09155 | 0.306471351 | 1.74312  | 0.000335 | hypermethylated |
| cg20000562 | 0.08229 | 0.275361622 | 1.742538 | 5.72E-05 | hypermethylated |
| cg02155884 | 0.07699 | 0.257619459 | 1.742499 | 3.67E-05 | hypermethylated |
| cg17362052 | 0.08556 | 0.286280541 | 1.742421 | 2.27E-05 | hypermethylated |
| cg02066682 | 0.06287 | 0.210359459 | 1.742413 | 1.54E-05 | hypermethylated |
| cg13959523 | 0.08493 | 0.284107568 | 1.742091 | 1.01E-05 | hypermethylated |
| cg18096722 | 0.09537 | 0.319028649 | 1.742079 | 5.21E-06 | hypermethylated |
| cg00376022 | 0.06266 | 0.209577838 | 1.741869 | 2.35E-05 | hypermethylated |
| cg11856542 | 0.08269 | 0.276528649 | 1.741644 | 1.39E-05 | hypermethylated |
| cg02571816 | 0.12247 | 0.409477297 | 1.741355 | 1.66E-05 | hypermethylated |
| cg07103129 | 0.12252 | 0.409637838 | 1.741332 | 1.01E-05 | hypermethylated |
| cg00998387 | 0.09779 | 0.32693027  | 1.741224 | 6.01E-05 | hypermethylated |
| cg02969141 | 0.12782 | 0.427216216 | 1.740853 | 9.31E-06 | hypermethylated |
| cg11818631 | 0.10503 | 0.350948108 | 1.740456 | 2.64E-05 | hypermethylated |
| cg24008884 | 0.06977 | 0.233037297 | 1.739882 | 4.36E-05 | hypermethylated |
| cg23294090 | 0.09915 | 0.331027568 | 1.739267 | 0.000265 | hypermethylated |
| cg07691152 | 0.12783 | 0.426615676 | 1.738711 | 1.08E-05 | hypermethylated |
| cg20945566 | 0.1293  | 0.431391351 | 1.738275 | 2.48E-05 | hypermethylated |
| cg12300353 | 0.093   | 0.310234054 | 1.738054 | 0.000245 | hypermethylated |
| cg16945312 | 0.11443 | 0.381673514 | 1.737874 | 1.42E-05 | hypermethylated |
| cg16670554 | 0.12565 | 0.419087027 | 1.737839 | 1.25E-05 | hypermethylated |
| cg04550052 | 0.11952 | 0.39846973  | 1.737218 | 2.39E-05 | hypermethylated |
| cg00839579 | 0.14296 | 0.476565946 | 1.737064 | 1.01E-05 | hypermethylated |
| cg03847373 | 0.09943 | 0.331436216 | 1.736978 | 1.31E-05 | hypermethylated |



|            |         |             |          |          |                 |
|------------|---------|-------------|----------|----------|-----------------|
| cg03430846 | 0.10479 | 0.34923027  | 1.736678 | 0.000129 | hypermethylated |
| cg27659787 | 0.08866 | 0.295434595 | 1.736484 | 1.21E-05 | hypermethylated |
| cg05379302 | 0.09321 | 0.310577297 | 1.736396 | 1.77E-05 | hypermethylated |
| cg08364561 | 0.16309 | 0.543357838 | 1.736234 | 1.29E-06 | hypermethylated |
| cg22974982 | 0.08415 | 0.280349189 | 1.73619  | 2.39E-05 | hypermethylated |
| cg13304274 | 0.09561 | 0.318517838 | 1.736141 | 5.32E-05 | hypermethylated |
| cg21095561 | 0.11038 | 0.367584324 | 1.735596 | 1.09E-05 | hypermethylated |
| cg25349154 | 0.09219 | 0.306783243 | 1.734538 | 3.07E-05 | hypermethylated |
| cg23651826 | 0.13763 | 0.457981622 | 1.734495 | 5.14E-06 | hypermethylated |
| cg05310990 | 0.1037  | 0.34507027  | 1.734474 | 2.74E-05 | hypermethylated |
| cg26649384 | 0.10298 | 0.34265027  | 1.734373 | 0.000256 | hypermethylated |
| cg03045635 | 0.14303 | 0.475887027 | 1.734301 | 6.05E-06 | hypermethylated |
| cg00963378 | 0.12141 | 0.403947568 | 1.734281 | 3.15E-05 | hypermethylated |
| cg24660009 | 0.07229 | 0.24041027  | 1.733631 | 0.000159 | hypermethylated |
| cg24632756 | 0.08151 | 0.271067568 | 1.733604 | 9.07E-06 | hypermethylated |
| cg23004758 | 0.12471 | 0.414603243 | 1.733154 | 2.39E-05 | hypermethylated |
| cg11215976 | 0.13413 | 0.445864865 | 1.732975 | 3.00E-05 | hypermethylated |
| cg09355771 | 0.06727 | 0.223564324 | 1.732655 | 1.73E-05 | hypermethylated |
| cg01024168 | 0.08586 | 0.28534     | 1.732624 | 5.79E-05 | hypermethylated |
| cg04486019 | 0.09668 | 0.321281081 | 1.732547 | 9.82E-06 | hypermethylated |
| cg19560710 | 0.07705 | 0.256047027 | 1.732542 | 0.000126 | hypermethylated |
| cg05212802 | 0.06572 | 0.218363784 | 1.732329 | 7.84E-05 | hypermethylated |
| cg26560110 | 0.06235 | 0.207166486 | 1.732329 | 2.32E-05 | hypermethylated |
| cg08676249 | 0.08942 | 0.297035676 | 1.731967 | 9.69E-06 | hypermethylated |
| cg05940984 | 0.09131 | 0.303311892 | 1.731957 | 8.03E-05 | hypermethylated |
| cg11727383 | 0.10977 | 0.364537838 | 1.731585 | 5.31E-05 | hypermethylated |
| cg02933679 | 0.08249 | 0.273936216 | 1.731549 | 9.07E-06 | hypermethylated |
| cg10603275 | 0.14214 | 0.47201027  | 1.731506 | 5.72E-05 | hypermethylated |
| cg12071328 | 0.12137 | 0.402995135 | 1.731351 | 6.46E-05 | hypermethylated |
| cg26730369 | 0.1012  | 0.336021081 | 1.731342 | 2.15E-05 | hypermethylated |
| cg19811087 | 0.06989 | 0.231861081 | 1.730103 | 7.72E-06 | hypermethylated |
| cg08116462 | 0.09914 | 0.328805405 | 1.729695 | 5.73E-06 | hypermethylated |
| cg12306414 | 0.09542 | 0.316414595 | 1.729453 | 0.000229 | hypermethylated |
| cg01874697 | 0.09907 | 0.328499459 | 1.729371 | 8.71E-06 | hypermethylated |
| cg05475524 | 0.10827 | 0.358985405 | 1.729292 | 0.000123 | hypermethylated |
| cg09887059 | 0.1484  | 0.492030811 | 1.729258 | 5.58E-06 | hypermethylated |
| cg25664338 | 0.07345 | 0.243503243 | 1.729107 | 0.000195 | hypermethylated |
| cg19461621 | 0.10802 | 0.358022162 | 1.72875  | 3.95E-05 | hypermethylated |
| cg03171770 | 0.14205 | 0.470761081 | 1.728596 | 7.93E-06 | hypermethylated |
| cg20924470 | 0.084   | 0.278243784 | 1.727888 | 2.61E-05 | hypermethylated |
| cg27454136 | 0.10646 | 0.352615135 | 1.727783 | 0.000165 | hypermethylated |
| cg13713830 | 0.08944 | 0.296154054 | 1.727356 | 2.51E-05 | hypermethylated |
| cg05484788 | 0.08331 | 0.275842703 | 1.727284 | 5.25E-05 | hypermethylated |
| cg21183256 | 0.13478 | 0.445918378 | 1.726173 | 2.32E-05 | hypermethylated |
| cg01610488 | 0.09406 | 0.311160541 | 1.726006 | 7.65E-05 | hypermethylated |
| cg14977066 | 0.09241 | 0.305671892 | 1.725863 | 1.97E-05 | hypermethylated |
| cg13718418 | 0.06735 | 0.22266     | 1.725093 | 6.62E-05 | hypermethylated |
| cg02942845 | 0.08683 | 0.287042703 | 1.725    | 5.45E-05 | hypermethylated |
| cg00912625 | 0.09961 | 0.329260541 | 1.724867 | 1.73E-05 | hypermethylated |
| cg15980539 | 0.09636 | 0.318407568 | 1.724368 | 7.84E-05 | hypermethylated |
| cg25103492 | 0.07503 | 0.247888108 | 1.72415  | 8.22E-05 | hypermethylated |
| cg14345497 | 0.08164 | 0.269721622 | 1.724123 | 1.87E-05 | hypermethylated |
| cg22557091 | 0.09385 | 0.310015676 | 1.723913 | 1.92E-05 | hypermethylated |
| cg23799901 | 0.09239 | 0.305182703 | 1.723865 | 8.22E-05 | hypermethylated |
| cg23291280 | 0.12502 | 0.412934595 | 1.723754 | 3.04E-06 | hypermethylated |
| cg04131583 | 0.08764 | 0.289463243 | 1.723719 | 2.71E-05 | hypermethylated |
| cg02990869 | 0.09369 | 0.309442162 | 1.723703 | 2.78E-05 | hypermethylated |
| cg09579310 | 0.08938 | 0.295204324 | 1.72369  | 2.21E-05 | hypermethylated |

|            |         |             |          |          |                 |
|------------|---------|-------------|----------|----------|-----------------|
| cg23153481 | 0.08204 | 0.270878378 | 1.723246 | 1.04E-05 | hypermethylated |
| cg10151685 | 0.1065  | 0.351575676 | 1.722982 | 2.45E-05 | hypermethylated |
| cg17403609 | 0.12173 | 0.401698378 | 1.722428 | 3.79E-06 | hypermethylated |
| cg26074603 | 0.13756 | 0.453797297 | 1.721987 | 1.94E-05 | hypermethylated |
| cg17152757 | 0.09558 | 0.31525027  | 1.721717 | 6.05E-06 | hypermethylated |
| cg09465698 | 0.11958 | 0.394339459 | 1.721462 | 1.12E-05 | hypermethylated |
| cg09430118 | 0.10976 | 0.361874595 | 1.721137 | 3.49E-06 | hypermethylated |
| cg11073558 | 0.11877 | 0.39148973  | 1.720804 | 2.51E-05 | hypermethylated |
| cg00162231 | 0.11068 | 0.364794054 | 1.720688 | 2.10E-05 | hypermethylated |
| cg25308742 | 0.08101 | 0.267000541 | 1.720671 | 3.69E-06 | hypermethylated |
| cg13492692 | 0.07485 | 0.246685405 | 1.720598 | 1.39E-05 | hypermethylated |
| cg26736812 | 0.09965 | 0.328340541 | 1.720251 | 4.36E-06 | hypermethylated |
| cg26422458 | 0.13232 | 0.435970811 | 1.7202   | 1.75E-05 | hypermethylated |
| cg17093995 | 0.08868 | 0.292164865 | 1.720102 | 0.000253 | hypermethylated |
| cg17474338 | 0.08692 | 0.286276216 | 1.719648 | 5.45E-05 | hypermethylated |
| cg03232620 | 0.11293 | 0.371732432 | 1.718836 | 2.92E-05 | hypermethylated |
| cg24226973 | 0.08291 | 0.272905946 | 1.718786 | 4.82E-05 | hypermethylated |
| cg05062333 | 0.08724 | 0.287038919 | 1.718185 | 4.47E-05 | hypermethylated |
| cg02355885 | 0.09349 | 0.307602162 | 1.718182 | 7.12E-06 | hypermethylated |
| cg10751726 | 0.0739  | 0.243138919 | 1.718135 | 0.000262 | hypermethylated |
| cg15515258 | 0.09868 | 0.324595676 | 1.717814 | 0.000101 | hypermethylated |
| cg18557131 | 0.09829 | 0.323069189 | 1.716727 | 1.09E-05 | hypermethylated |
| cg05295006 | 0.10456 | 0.343653514 | 1.716624 | 1.31E-05 | hypermethylated |
| cg00292701 | 0.0718  | 0.235862162 | 1.715888 | 6.84E-06 | hypermethylated |
| cg17827020 | 0.08025 | 0.263588649 | 1.715715 | 9.82E-06 | hypermethylated |
| cg11841394 | 0.08849 | 0.290628649 | 1.715591 | 5.65E-05 | hypermethylated |
| cg23657185 | 0.09409 | 0.308933514 | 1.715183 | 7.84E-05 | hypermethylated |
| cg21124497 | 0.10385 | 0.340936216 | 1.715001 | 3.62E-05 | hypermethylated |
| cg17966167 | 0.0845  | 0.277386486 | 1.714874 | 4.70E-05 | hypermethylated |
| cg23300372 | 0.08852 | 0.290557838 | 1.71475  | 4.82E-05 | hypermethylated |
| cg01461840 | 0.07597 | 0.249289189 | 1.714319 | 4.73E-06 | hypermethylated |
| cg05048377 | 0.11427 | 0.374755135 | 1.713502 | 3.67E-05 | hypermethylated |
| cg11144641 | 0.09509 | 0.311787027 | 1.713195 | 1.80E-05 | hypermethylated |
| cg17891759 | 0.09421 | 0.308814054 | 1.712786 | 1.28E-05 | hypermethylated |
| cg04910921 | 0.11206 | 0.367315676 | 1.712749 | 3.12E-06 | hypermethylated |
| cg03775422 | 0.08766 | 0.287319459 | 1.712665 | 8.03E-05 | hypermethylated |
| cg24645214 | 0.09736 | 0.31895027  | 1.71193  | 0.000271 | hypermethylated |
| cg04922810 | 0.08139 | 0.266601081 | 1.711759 | 2.53E-06 | hypermethylated |
| cg01448276 | 0.09308 | 0.304877838 | 1.711688 | 1.58E-05 | hypermethylated |
| cg24611446 | 0.10791 | 0.353400541 | 1.711476 | 8.15E-06 | hypermethylated |
| cg07224726 | 0.0955  | 0.312658378 | 1.711015 | 1.42E-05 | hypermethylated |
| cg02388865 | 0.11934 | 0.39066973  | 1.710872 | 9.66E-07 | hypermethylated |
| cg17400476 | 0.10671 | 0.349267027 | 1.710635 | 8.22E-05 | hypermethylated |
| cg08718490 | 0.1404  | 0.459477838 | 1.710452 | 1.22E-06 | hypermethylated |
| cg20611911 | 0.1113  | 0.363995676 | 1.709468 | 2.32E-05 | hypermethylated |
| cg08499046 | 0.1413  | 0.461839459 | 1.70863  | 1.64E-05 | hypermethylated |
| cg05575614 | 0.1234  | 0.403282162 | 1.708447 | 4.48E-06 | hypermethylated |
| cg10591652 | 0.06352 | 0.207567568 | 1.708298 | 6.95E-05 | hypermethylated |
| cg04617948 | 0.09415 | 0.307536757 | 1.707726 | 1.04E-05 | hypermethylated |
| cg12917718 | 0.0803  | 0.262257838 | 1.707514 | 3.90E-05 | hypermethylated |
| cg01612730 | 0.06634 | 0.216661622 | 1.707493 | 3.23E-05 | hypermethylated |
| cg02345991 | 0.08821 | 0.288023243 | 1.707171 | 0.000204 | hypermethylated |
| cg09014354 | 0.10134 | 0.330892973 | 1.707161 | 9.05E-05 | hypermethylated |
| cg27473895 | 0.10083 | 0.329182703 | 1.706964 | 3.95E-05 | hypermethylated |
| cg26593267 | 0.08649 | 0.282354054 | 1.7069   | 7.56E-05 | hypermethylated |
| cg04490714 | 0.09545 | 0.311563243 | 1.706708 | 2.45E-05 | hypermethylated |
| cg22795470 | 0.09771 | 0.318917838 | 1.706607 | 4.67E-06 | hypermethylated |
| cg21816308 | 0.10358 | 0.338073514 | 1.706592 | 0.000117 | hypermethylated |

|            |         |             |          |          |                 |
|------------|---------|-------------|----------|----------|-----------------|
| cg27170782 | 0.10842 | 0.35382973  | 1.706424 | 5.65E-05 | hypermethylated |
| cg10526277 | 0.12004 | 0.391715676 | 1.706292 | 5.00E-06 | hypermethylated |
| cg23696752 | 0.09862 | 0.321741622 | 1.70595  | 1.48E-05 | hypermethylated |
| cg12525474 | 0.09212 | 0.30047027  | 1.705636 | 3.76E-05 | hypermethylated |
| cg11325970 | 0.09155 | 0.298466486 | 1.704937 | 1.99E-05 | hypermethylated |
| cg27416372 | 0.10688 | 0.348356757 | 1.704574 | 6.84E-06 | hypermethylated |
| cg11873482 | 0.10983 | 0.357939459 | 1.704443 | 0.000129 | hypermethylated |
| cg24189904 | 0.10293 | 0.335437838 | 1.704382 | 2.16E-06 | hypermethylated |
| cg18034737 | 0.12989 | 0.423288649 | 1.704351 | 1.28E-05 | hypermethylated |
| cg24889512 | 0.09921 | 0.323284865 | 1.704249 | 1.25E-05 | hypermethylated |
| cg04431946 | 0.12367 | 0.402824865 | 1.703657 | 5.93E-05 | hypermethylated |
| cg13033990 | 0.08059 | 0.262487027 | 1.703573 | 3.07E-05 | hypermethylated |
| cg08448589 | 0.09048 | 0.294695676 | 1.703555 | 2.78E-05 | hypermethylated |
| cg06272611 | 0.0889  | 0.289517297 | 1.703394 | 1.99E-05 | hypermethylated |
| cg10552126 | 0.10817 | 0.352234054 | 1.703234 | 1.52E-05 | hypermethylated |
| cg22946150 | 0.09705 | 0.315982162 | 1.703043 | 0.00064  | hypermethylated |
| cg12880658 | 0.09961 | 0.324259459 | 1.702786 | 1.15E-05 | hypermethylated |
| cg14602530 | 0.10581 | 0.344431351 | 1.70274  | 9.31E-06 | hypermethylated |
| cg04499648 | 0.08625 | 0.280654054 | 1.702197 | 7.93E-05 | hypermethylated |
| cg06759374 | 0.06869 | 0.223445946 | 1.701754 | 1.39E-05 | hypermethylated |
| cg09614415 | 0.12809 | 0.416311351 | 1.700505 | 6.57E-06 | hypermethylated |
| cg16065021 | 0.1302  | 0.423141622 | 1.700411 | 1.50E-05 | hypermethylated |
| cg11701471 | 0.10639 | 0.345627568 | 1.699856 | 0.000517 | hypermethylated |
| cg19974854 | 0.07729 | 0.25108973  | 1.699849 | 5.97E-06 | hypermethylated |
| cg15638709 | 0.14554 | 0.472704865 | 1.699524 | 1.46E-05 | hypermethylated |
| cg23684973 | 0.08793 | 0.285572432 | 1.699429 | 9.05E-05 | hypermethylated |
| cg25567594 | 0.12401 | 0.402695676 | 1.699234 | 1.06E-05 | hypermethylated |
| cg24116870 | 0.09448 | 0.306684865 | 1.698676 | 5.35E-06 | hypermethylated |
| cg07171111 | 0.10055 | 0.326343784 | 1.698479 | 4.01E-06 | hypermethylated |
| cg07850418 | 0.09882 | 0.320591351 | 1.697861 | 5.58E-06 | hypermethylated |
| cg00396667 | 0.11412 | 0.370068108 | 1.697239 | 1.09E-05 | hypermethylated |
| cg08211028 | 0.11088 | 0.35954973  | 1.697192 | 4.58E-05 | hypermethylated |
| cg03175653 | 0.09475 | 0.307241622 | 1.697176 | 3.69E-06 | hypermethylated |
| cg20574415 | 0.06913 | 0.224134054 | 1.696978 | 6.31E-05 | hypermethylated |
| cg24563570 | 0.0643  | 0.208425946 | 1.696644 | 3.76E-05 | hypermethylated |
| cg11580948 | 0.08004 | 0.259424865 | 1.696524 | 2.89E-05 | hypermethylated |
| cg04534926 | 0.07692 | 0.249304324 | 1.696477 | 9.05E-05 | hypermethylated |
| cg03790250 | 0.11682 | 0.378522162 | 1.69609  | 1.01E-05 | hypermethylated |
| cg09311683 | 0.08488 | 0.275012973 | 1.696003 | 3.44E-05 | hypermethylated |
| cg02759846 | 0.08226 | 0.266516757 | 1.695963 | 2.02E-05 | hypermethylated |
| cg18698788 | 0.11624 | 0.376499459 | 1.695541 | 0.000805 | hypermethylated |
| cg10362591 | 0.11412 | 0.369554054 | 1.695234 | 4.58E-05 | hypermethylated |
| cg21548155 | 0.11925 | 0.386112432 | 1.695032 | 1.28E-05 | hypermethylated |
| cg25987194 | 0.07918 | 0.256347568 | 1.694893 | 0.000283 | hypermethylated |
| cg19047707 | 0.10856 | 0.351354054 | 1.694433 | 2.15E-05 | hypermethylated |
| cg18239753 | 0.10388 | 0.336115676 | 1.69404  | 3.85E-05 | hypermethylated |
| cg01366419 | 0.10467 | 0.338660541 | 1.693992 | 1.21E-05 | hypermethylated |
| cg25371634 | 0.09036 | 0.292336757 | 1.693875 | 2.85E-05 | hypermethylated |
| cg13566648 | 0.0776  | 0.251051351 | 1.693854 | 2.27E-05 | hypermethylated |
| cg27032232 | 0.13965 | 0.451788649 | 1.693832 | 1.58E-05 | hypermethylated |
| cg12268575 | 0.08627 | 0.279036216 | 1.693522 | 2.24E-05 | hypermethylated |
| cg14001664 | 0.14789 | 0.478294595 | 1.693375 | 2.29E-06 | hypermethylated |
| cg19771465 | 0.07475 | 0.241724324 | 1.693217 | 1.46E-05 | hypermethylated |
| cg07920503 | 0.13773 | 0.445381081 | 1.693197 | 0.000159 | hypermethylated |
| cg19623360 | 0.0683  | 0.22082     | 1.692913 | 1.77E-05 | hypermethylated |
| cg04553838 | 0.07835 | 0.253288649 | 1.692777 | 2.51E-05 | hypermethylated |
| cg14583673 | 0.0861  | 0.278318919 | 1.692654 | 3.40E-05 | hypermethylated |
| cg00157668 | 0.12094 | 0.390935676 | 1.69264  | 2.71E-05 | hypermethylated |

|            |         |             |          |          |                 |
|------------|---------|-------------|----------|----------|-----------------|
| cg26390889 | 0.09332 | 0.301650811 | 1.692621 | 4.58E-05 | hypermethylated |
| cg27634876 | 0.07723 | 0.249640541 | 1.692619 | 2.92E-05 | hypermethylated |
| cg09936426 | 0.124   | 0.400581081 | 1.691754 | 9.96E-06 | hypermethylated |
| cg01210554 | 0.07089 | 0.229002703 | 1.691711 | 1.46E-05 | hypermethylated |
| cg00582316 | 0.08462 | 0.273352432 | 1.691692 | 0.000245 | hypermethylated |
| cg22643811 | 0.10692 | 0.345380541 | 1.691655 | 9.07E-06 | hypermethylated |
| cg17727929 | 0.08645 | 0.27922973  | 1.691515 | 1.20E-05 | hypermethylated |
| cg14875171 | 0.13954 | 0.450663243 | 1.691371 | 3.44E-06 | hypermethylated |
| cg07819944 | 0.12826 | 0.413751892 | 1.689695 | 6.46E-05 | hypermethylated |
| cg08159291 | 0.11375 | 0.366896216 | 1.689505 | 5.28E-06 | hypermethylated |
| cg04651781 | 0.10919 | 0.352127027 | 1.689255 | 6.75E-06 | hypermethylated |
| cg14714797 | 0.10754 | 0.34676973  | 1.689105 | 2.57E-05 | hypermethylated |
| cg03981954 | 0.09655 | 0.311212973 | 1.688554 | 9.95E-05 | hypermethylated |
| cg10172669 | 0.0899  | 0.289680541 | 1.68807  | 3.39E-06 | hypermethylated |
| cg11308840 | 0.06548 | 0.210911892 | 1.687514 | 1.46E-05 | hypermethylated |
| cg00663972 | 0.08824 | 0.284176216 | 1.687281 | 6.39E-06 | hypermethylated |
| cg25406138 | 0.09092 | 0.292705946 | 1.686782 | 1.64E-05 | hypermethylated |
| cg26656135 | 0.0967  | 0.311267027 | 1.686565 | 6.31E-05 | hypermethylated |
| cg15092343 | 0.16706 | 0.537655676 | 1.686316 | 4.86E-06 | hypermethylated |
| cg27032146 | 0.1327  | 0.426743243 | 1.6852   | 6.13E-06 | hypermethylated |
| cg10778441 | 0.08697 | 0.279655676 | 1.685062 | 9.82E-06 | hypermethylated |
| cg08430329 | 0.08829 | 0.28389027  | 1.685011 | 0.000135 | hypermethylated |
| cg04206351 | 0.09932 | 0.319307027 | 1.684788 | 2.45E-05 | hypermethylated |
| cg24809973 | 0.14476 | 0.465387568 | 1.68477  | 1.82E-06 | hypermethylated |
| cg08959216 | 0.10524 | 0.338314054 | 1.68468  | 6.62E-05 | hypermethylated |
| cg27011060 | 0.10153 | 0.326292432 | 1.684259 | 0.000354 | hypermethylated |
| cg26911220 | 0.09955 | 0.319908649 | 1.684167 | 0.000106 | hypermethylated |
| cg04328762 | 0.10127 | 0.325379459 | 1.683916 | 0.000667 | hypermethylated |
| cg24089600 | 0.12347 | 0.396619459 | 1.683595 | 2.92E-05 | hypermethylated |
| cg03893271 | 0.1151  | 0.369703243 | 1.68348  | 1.09E-05 | hypermethylated |
| cg08165221 | 0.09351 | 0.300290811 | 1.683168 | 7.72E-06 | hypermethylated |
| cg16269733 | 0.13319 | 0.427548649 | 1.682603 | 1.04E-05 | hypermethylated |
| cg18940047 | 0.12345 | 0.396251892 | 1.682491 | 6.66E-06 | hypermethylated |
| cg14754787 | 0.16962 | 0.544285405 | 1.682057 | 1.93E-06 | hypermethylated |
| cg09336320 | 0.0997  | 0.319858378 | 1.681768 | 3.85E-05 | hypermethylated |
| cg24436715 | 0.13306 | 0.426708108 | 1.681173 | 1.15E-06 | hypermethylated |
| cg25537993 | 0.11487 | 0.368369189 | 1.68115  | 2.21E-05 | hypermethylated |
| cg01105140 | 0.09757 | 0.312813514 | 1.680793 | 1.62E-05 | hypermethylated |
| cg05992357 | 0.07423 | 0.237965946 | 1.680681 | 5.00E-05 | hypermethylated |
| cg07382554 | 0.08761 | 0.280811892 | 1.680437 | 3.49E-06 | hypermethylated |
| cg06679720 | 0.10669 | 0.341954054 | 1.680378 | 6.93E-06 | hypermethylated |
| cg20095233 | 0.09484 | 0.303928649 | 1.680165 | 6.95E-05 | hypermethylated |
| cg06213468 | 0.07592 | 0.243228649 | 1.679761 | 1.99E-05 | hypermethylated |
| cg01495122 | 0.11648 | 0.373109189 | 1.679516 | 3.85E-05 | hypermethylated |
| cg15699226 | 0.10483 | 0.335762162 | 1.679388 | 3.59E-06 | hypermethylated |
| cg26931862 | 0.11928 | 0.382044324 | 1.679388 | 4.60E-06 | hypermethylated |
| cg15343119 | 0.0967  | 0.309680541 | 1.679193 | 2.15E-05 | hypermethylated |
| cg25476766 | 0.08412 | 0.269389189 | 1.679171 | 1.18E-05 | hypermethylated |
| cg01749436 | 0.08223 | 0.263302162 | 1.678983 | 2.89E-05 | hypermethylated |
| cg22345692 | 0.07226 | 0.231363784 | 1.678894 | 9.07E-06 | hypermethylated |
| cg26974111 | 0.07257 | 0.232343243 | 1.678813 | 9.82E-06 | hypermethylated |
| cg02216246 | 0.10418 | 0.333512973 | 1.678665 | 2.92E-05 | hypermethylated |
| cg16590237 | 0.0905  | 0.289673514 | 1.678438 | 0.000148 | hypermethylated |
| cg06324785 | 0.07268 | 0.232537838 | 1.677835 | 1.58E-06 | hypermethylated |
| cg02622052 | 0.08349 | 0.267094054 | 1.677673 | 0.00017  | hypermethylated |
| cg20498685 | 0.11295 | 0.361335676 | 1.677655 | 5.06E-05 | hypermethylated |
| cg11554266 | 0.06857 | 0.219296757 | 1.677235 | 9.07E-06 | hypermethylated |
| cg05350411 | 0.08599 | 0.274995135 | 1.677165 | 1.43E-06 | hypermethylated |

|            |         |             |          |          |                 |
|------------|---------|-------------|----------|----------|-----------------|
| cg25976242 | 0.08616 | 0.275504324 | 1.676985 | 7.84E-05 | hypermethylated |
| cg14131755 | 0.09843 | 0.314727568 | 1.676934 | 1.02E-05 | hypermethylated |
| cg17524637 | 0.1204  | 0.384957297 | 1.676863 | 1.09E-05 | hypermethylated |
| cg00296182 | 0.07801 | 0.249394054 | 1.676696 | 0.000126 | hypermethylated |
| cg20457796 | 0.09441 | 0.301741622 | 1.676302 | 7.93E-06 | hypermethylated |
| cg07647726 | 0.07704 | 0.246158378 | 1.675907 | 3.81E-05 | hypermethylated |
| cg02694427 | 0.11699 | 0.373762162 | 1.675735 | 2.29E-06 | hypermethylated |
| cg07962128 | 0.08591 | 0.274314054 | 1.674931 | 2.48E-05 | hypermethylated |
| cg18347642 | 0.11323 | 0.361442162 | 1.674509 | 8.37E-06 | hypermethylated |
| cg03817667 | 0.12212 | 0.389732432 | 1.674184 | 4.70E-05 | hypermethylated |
| cg10055501 | 0.13167 | 0.420150811 | 1.673981 | 8.37E-06 | hypermethylated |
| cg02370605 | 0.0777  | 0.247888649 | 1.673706 | 5.58E-05 | hypermethylated |
| cg26149275 | 0.11722 | 0.37391027  | 1.673473 | 2.32E-06 | hypermethylated |
| cg11469391 | 0.0958  | 0.305567568 | 1.673394 | 6.84E-06 | hypermethylated |
| cg25324047 | 0.09712 | 0.309762162 | 1.673321 | 4.42E-05 | hypermethylated |
| cg25585712 | 0.0969  | 0.308847568 | 1.672326 | 3.23E-05 | hypermethylated |
| cg11717507 | 0.11724 | 0.373664324 | 1.672278 | 3.49E-05 | hypermethylated |
| cg05771518 | 0.07014 | 0.223510811 | 1.672035 | 1.38E-05 | hypermethylated |
| cg13875518 | 0.08797 | 0.2803      | 1.671888 | 4.15E-05 | hypermethylated |
| cg17312004 | 0.09259 | 0.294979459 | 1.671686 | 0.000324 | hypermethylated |
| cg05839235 | 0.0917  | 0.292131351 | 1.671624 | 4.93E-06 | hypermethylated |
| cg23054883 | 0.09116 | 0.29022973  | 1.670722 | 9.07E-06 | hypermethylated |
| cg21982950 | 0.11053 | 0.351730811 | 1.670034 | 1.33E-06 | hypermethylated |
| cg26116950 | 0.12948 | 0.412012432 | 1.669959 | 3.15E-05 | hypermethylated |
| cg26567423 | 0.12987 | 0.413234595 | 1.669893 | 1.31E-05 | hypermethylated |
| cg05317090 | 0.14057 | 0.447135676 | 1.669424 | 4.60E-06 | hypermethylated |
| cg07012926 | 0.08909 | 0.283338378 | 1.669191 | 3.15E-05 | hypermethylated |
| cg09487611 | 0.08402 | 0.26720973  | 1.669168 | 9.31E-06 | hypermethylated |
| cg04861929 | 0.11348 | 0.360835135 | 1.668902 | 2.21E-05 | hypermethylated |
| cg23325963 | 0.11763 | 0.374003784 | 1.668797 | 8.84E-05 | hypermethylated |
| cg04574459 | 0.1029  | 0.327135135 | 1.668644 | 0.000216 | hypermethylated |
| cg19109538 | 0.09221 | 0.293136216 | 1.668576 | 8.13E-05 | hypermethylated |
| cg19742055 | 0.07992 | 0.254045946 | 1.668461 | 5.72E-05 | hypermethylated |
| cg08726446 | 0.06763 | 0.21494973  | 1.668264 | 1.75E-05 | hypermethylated |
| cg25527090 | 0.16631 | 0.528527027 | 1.668102 | 2.71E-06 | hypermethylated |
| cg06838365 | 0.08324 | 0.264532973 | 1.668099 | 4.58E-05 | hypermethylated |
| cg10177394 | 0.08137 | 0.258527027 | 1.667746 | 9.31E-06 | hypermethylated |
| cg04406454 | 0.09044 | 0.287334595 | 1.667699 | 4.80E-06 | hypermethylated |
| cg26595643 | 0.10294 | 0.327031351 | 1.667625 | 1.31E-05 | hypermethylated |
| cg02318567 | 0.10862 | 0.345066486 | 1.667585 | 9.07E-06 | hypermethylated |
| cg11124364 | 0.1092  | 0.346908649 | 1.667583 | 8.15E-06 | hypermethylated |
| cg21106486 | 0.1091  | 0.346588649 | 1.667573 | 1.15E-05 | hypermethylated |
| cg02187214 | 0.09442 | 0.299931351 | 1.667468 | 8.15E-06 | hypermethylated |
| cg11500797 | 0.12349 | 0.392158378 | 1.667042 | 4.01E-06 | hypermethylated |
| cg02640041 | 0.10453 | 0.331902703 | 1.666843 | 1.09E-05 | hypermethylated |
| cg02409351 | 0.08923 | 0.283289189 | 1.666675 | 2.18E-05 | hypermethylated |
| cg10520887 | 0.09466 | 0.300506486 | 1.666569 | 8.84E-05 | hypermethylated |
| cg10029842 | 0.07955 | 0.252457838 | 1.666109 | 1.99E-05 | hypermethylated |
| cg23786625 | 0.11343 | 0.35997027  | 1.666076 | 1.09E-05 | hypermethylated |
| cg04988476 | 0.10102 | 0.320516757 | 1.665759 | 4.94E-05 | hypermethylated |
| cg11789740 | 0.09006 | 0.285694595 | 1.665515 | 2.64E-05 | hypermethylated |
| cg00384539 | 0.13566 | 0.430098919 | 1.664673 | 5.19E-05 | hypermethylated |
| cg10406295 | 0.11307 | 0.358467027 | 1.664624 | 6.15E-05 | hypermethylated |
| cg05030680 | 0.11579 | 0.367071892 | 1.664552 | 4.12E-06 | hypermethylated |
| cg22488256 | 0.12758 | 0.404403784 | 1.664394 | 1.50E-05 | hypermethylated |
| cg00674679 | 0.10925 | 0.346247568 | 1.664171 | 2.85E-05 | hypermethylated |
| cg12907702 | 0.06531 | 0.206873514 | 1.663373 | 2.15E-05 | hypermethylated |
| cg10158541 | 0.13761 | 0.435867568 | 1.663305 | 7.72E-06 | hypermethylated |

|            |         |             |          |          |                 |
|------------|---------|-------------|----------|----------|-----------------|
| cg26832142 | 0.06041 | 0.19132     | 1.663128 | 2.24E-05 | hypermethylated |
| cg25164624 | 0.10648 | 0.337103784 | 1.66261  | 0.000718 | hypermethylated |
| cg23322933 | 0.13942 | 0.44127027  | 1.662225 | 6.93E-06 | hypermethylated |
| cg04531425 | 0.07335 | 0.232121622 | 1.662012 | 2.32E-05 | hypermethylated |
| cg16428251 | 0.1116  | 0.353154595 | 1.661963 | 6.22E-06 | hypermethylated |
| cg09768178 | 0.09606 | 0.303788108 | 1.661058 | 1.23E-05 | hypermethylated |
| cg27190946 | 0.10262 | 0.324474595 | 1.660794 | 4.58E-05 | hypermethylated |
| cg10047595 | 0.09092 | 0.287461622 | 1.6607   | 0.000165 | hypermethylated |
| cg09639151 | 0.15083 | 0.47687027  | 1.660673 | 3.90E-06 | hypermethylated |
| cg06719900 | 0.12623 | 0.398988649 | 1.660293 | 6.39E-06 | hypermethylated |
| cg19623717 | 0.10704 | 0.338265946 | 1.660008 | 1.99E-05 | hypermethylated |
| cg10477621 | 0.15228 | 0.481215135 | 1.659956 | 2.49E-06 | hypermethylated |
| cg11824639 | 0.07607 | 0.240376757 | 1.659898 | 6.23E-05 | hypermethylated |
| cg18106668 | 0.10964 | 0.346354595 | 1.659476 | 2.53E-06 | hypermethylated |
| cg20253468 | 0.09705 | 0.306543243 | 1.65929  | 7.93E-06 | hypermethylated |
| cg15428435 | 0.09152 | 0.289027027 | 1.659045 | 0.00015  | hypermethylated |
| cg25496678 | 0.11065 | 0.349437838 | 1.659032 | 1.94E-05 | hypermethylated |
| cg12419135 | 0.13076 | 0.412929189 | 1.658973 | 0.000365 | hypermethylated |
| cg04598517 | 0.11737 | 0.370612973 | 1.65885  | 1.21E-05 | hypermethylated |
| cg00504705 | 0.105   | 0.331498378 | 1.658612 | 1.35E-05 | hypermethylated |
| cg23042510 | 0.09479 | 0.299143784 | 1.658032 | 5.89E-06 | hypermethylated |
| cg05622465 | 0.08545 | 0.26962     | 1.657775 | 2.13E-05 | hypermethylated |
| cg18479593 | 0.11527 | 0.363563784 | 1.657191 | 2.78E-05 | hypermethylated |
| cg01834022 | 0.13813 | 0.435618378 | 1.657038 | 7.47E-05 | hypermethylated |
| cg00586644 | 0.09427 | 0.297277297 | 1.656939 | 2.04E-05 | hypermethylated |
| cg10767336 | 0.07854 | 0.247645405 | 1.656776 | 6.48E-06 | hypermethylated |
| cg08248516 | 0.12995 | 0.409641081 | 1.656404 | 1.94E-05 | hypermethylated |
| cg13964105 | 0.09015 | 0.284118919 | 1.656096 | 2.10E-05 | hypermethylated |
| cg24827660 | 0.10088 | 0.317900541 | 1.655935 | 0.000445 | hypermethylated |
| cg12493218 | 0.07929 | 0.249846486 | 1.655831 | 1.47E-06 | hypermethylated |
| cg20552282 | 0.08243 | 0.259700541 | 1.655608 | 1.25E-05 | hypermethylated |
| cg21306006 | 0.08293 | 0.261258378 | 1.655511 | 3.07E-05 | hypermethylated |
| cg06704093 | 0.09657 | 0.304144324 | 1.655109 | 4.36E-05 | hypermethylated |
| cg23165899 | 0.10245 | 0.322505946 | 1.654406 | 3.44E-05 | hypermethylated |
| cg21169914 | 0.10502 | 0.330575676 | 1.654316 | 1.94E-05 | hypermethylated |
| cg20635409 | 0.09044 | 0.28468     | 1.654308 | 6.62E-05 | hypermethylated |
| cg01873311 | 0.09937 | 0.312784324 | 1.654286 | 4.82E-05 | hypermethylated |
| cg12114834 | 0.13259 | 0.417172973 | 1.653674 | 1.46E-05 | hypermethylated |
| cg09354241 | 0.13081 | 0.411545946 | 1.653581 | 1.44E-05 | hypermethylated |
| cg06163371 | 0.10328 | 0.324886486 | 1.653375 | 3.19E-05 | hypermethylated |
| cg03383508 | 0.07785 | 0.24488973  | 1.653363 | 0.00035  | hypermethylated |
| cg20732478 | 0.10358 | 0.325764324 | 1.653083 | 3.04E-06 | hypermethylated |
| cg09943716 | 0.08849 | 0.278276757 | 1.652934 | 1.75E-05 | hypermethylated |
| cg05733135 | 0.08436 | 0.265255135 | 1.65275  | 0.00062  | hypermethylated |
| cg24711649 | 0.07933 | 0.249434595 | 1.652723 | 3.49E-05 | hypermethylated |
| cg03556497 | 0.08035 | 0.252631892 | 1.652667 | 1.58E-05 | hypermethylated |
| cg25397922 | 0.11321 | 0.355921622 | 1.652558 | 0.000195 | hypermethylated |
| cg00254133 | 0.0912  | 0.286687027 | 1.652371 | 0.000271 | hypermethylated |
| cg13078381 | 0.08241 | 0.259014054 | 1.652139 | 1.31E-05 | hypermethylated |
| cg16793187 | 0.0761  | 0.239175135 | 1.652099 | 1.77E-05 | hypermethylated |
| cg00185566 | 0.08033 | 0.252425946 | 1.651849 | 9.95E-05 | hypermethylated |
| cg04304705 | 0.1396  | 0.438648649 | 1.651767 | 3.12E-06 | hypermethylated |
| cg16331929 | 0.08499 | 0.266994054 | 1.651443 | 0.000117 | hypermethylated |
| cg11021995 | 0.10007 | 0.314281081 | 1.651046 | 4.70E-05 | hypermethylated |
| cg26186727 | 0.10822 | 0.339744865 | 1.650485 | 6.22E-06 | hypermethylated |
| cg19098710 | 0.11681 | 0.366708649 | 1.650471 | 6.75E-06 | hypermethylated |
| cg24914355 | 0.10685 | 0.335307027 | 1.649896 | 4.05E-05 | hypermethylated |
| cg01919632 | 0.09088 | 0.285154054 | 1.649707 | 1.99E-05 | hypermethylated |

|            |         |             |          |          |                 |
|------------|---------|-------------|----------|----------|-----------------|
| cg07272711 | 0.08388 | 0.263132973 | 1.649393 | 5.14E-06 | hypermethylated |
| cg09123188 | 0.11371 | 0.356676216 | 1.649256 | 2.71E-05 | hypermethylated |
| cg22686881 | 0.11812 | 0.370469189 | 1.6491   | 2.07E-06 | hypermethylated |
| cg04511041 | 0.09676 | 0.30344973  | 1.648975 | 3.49E-05 | hypermethylated |
| cg14236662 | 0.13809 | 0.432958378 | 1.648619 | 4.36E-06 | hypermethylated |
| cg05095591 | 0.11785 | 0.36944973  | 1.648426 | 3.90E-06 | hypermethylated |
| cg24333629 | 0.10774 | 0.337754595 | 1.648421 | 2.45E-05 | hypermethylated |
| cg13403815 | 0.08831 | 0.276787568 | 1.64813  | 1.46E-05 | hypermethylated |
| cg23302649 | 0.12246 | 0.383814595 | 1.648099 | 2.15E-05 | hypermethylated |
| cg03326762 | 0.1034  | 0.324076216 | 1.648097 | 7.52E-06 | hypermethylated |
| cg04552470 | 0.07839 | 0.245665405 | 1.647953 | 2.30E-05 | hypermethylated |
| cg19343464 | 0.12985 | 0.406921622 | 1.647905 | 2.42E-05 | hypermethylated |
| cg07870999 | 0.12903 | 0.404325946 | 1.647812 | 6.22E-06 | hypermethylated |
| cg08833577 | 0.12091 | 0.378835676 | 1.647639 | 1.89E-05 | hypermethylated |
| cg07434271 | 0.10887 | 0.341056216 | 1.647403 | 3.90E-06 | hypermethylated |
| cg05732979 | 0.09662 | 0.302664324 | 1.647325 | 1.21E-05 | hypermethylated |
| cg03290530 | 0.1339  | 0.419417297 | 1.64723  | 1.41E-06 | hypermethylated |
| cg04546041 | 0.11455 | 0.358801081 | 1.647207 | 4.05E-05 | hypermethylated |
| cg12001304 | 0.14367 | 0.449979459 | 1.6471   | 1.62E-05 | hypermethylated |
| cg06854015 | 0.04721 | 0.147863243 | 1.647099 | 3.00E-05 | hypermethylated |
| cg01245966 | 0.09032 | 0.282852973 | 1.646935 | 4.64E-05 | hypermethylated |
| cg12848065 | 0.10844 | 0.339571892 | 1.64682  | 5.58E-05 | hypermethylated |
| cg23916167 | 0.10322 | 0.323104865 | 1.64628  | 3.67E-05 | hypermethylated |
| cg10530883 | 0.15677 | 0.490683784 | 1.646144 | 3.30E-06 | hypermethylated |
| cg22191326 | 0.0971  | 0.303843784 | 1.645787 | 1.89E-05 | hypermethylated |
| cg03167683 | 0.09368 | 0.293131892 | 1.645737 | 0.000189 | hypermethylated |
| cg04761722 | 0.06559 | 0.205184865 | 1.645377 | 2.10E-06 | hypermethylated |
| cg00397635 | 0.10258 | 0.320888108 | 1.645321 | 5.38E-05 | hypermethylated |
| cg27072996 | 0.14425 | 0.450995135 | 1.644541 | 2.15E-05 | hypermethylated |
| cg09624466 | 0.16034 | 0.501267568 | 1.644447 | 3.21E-06 | hypermethylated |
| cg19134945 | 0.10299 | 0.321943784 | 1.644305 | 0.000667 | hypermethylated |
| cg07203423 | 0.13781 | 0.430655676 | 1.643854 | 8.95E-06 | hypermethylated |
| cg20189244 | 0.12308 | 0.384575676 | 1.643671 | 9.66E-07 | hypermethylated |
| cg02013838 | 0.12548 | 0.391885405 | 1.642974 | 2.85E-05 | hypermethylated |
| cg14359292 | 0.11388 | 0.355592973 | 1.642712 | 2.24E-05 | hypermethylated |
| cg00127167 | 0.12381 | 0.386569189 | 1.642599 | 1.28E-05 | hypermethylated |
| cg11973479 | 0.07132 | 0.222643243 | 1.642355 | 1.25E-05 | hypermethylated |
| cg26419265 | 0.11672 | 0.364331892 | 1.642201 | 2.21E-05 | hypermethylated |
| cg13337047 | 0.09562 | 0.298433514 | 1.642025 | 0.00017  | hypermethylated |
| cg23756251 | 0.08725 | 0.27226     | 1.641758 | 1.46E-05 | hypermethylated |
| cg19793376 | 0.1054  | 0.328852973 | 1.641568 | 2.04E-05 | hypermethylated |
| cg20712263 | 0.09764 | 0.304610811 | 1.641423 | 0.000268 | hypermethylated |
| cg06010588 | 0.13861 | 0.432317297 | 1.641059 | 5.19E-05 | hypermethylated |
| cg13125157 | 0.15148 | 0.472454054 | 1.641047 | 5.06E-05 | hypermethylated |
| cg02824386 | 0.09272 | 0.289097297 | 1.640603 | 6.01E-05 | hypermethylated |
| cg11141380 | 0.11367 | 0.354391892 | 1.640494 | 1.09E-05 | hypermethylated |
| cg07765621 | 0.11191 | 0.348862703 | 1.64032  | 2.71E-05 | hypermethylated |
| cg09970569 | 0.09273 | 0.289064324 | 1.640283 | 2.57E-05 | hypermethylated |
| cg15873149 | 0.12539 | 0.390773514 | 1.63991  | 6.14E-06 | hypermethylated |
| cg02259324 | 0.11684 | 0.36404973  | 1.639601 | 6.95E-05 | hypermethylated |
| cg12118843 | 0.10754 | 0.335055676 | 1.639527 | 4.86E-06 | hypermethylated |
| cg16991765 | 0.13433 | 0.41852     | 1.639515 | 8.60E-06 | hypermethylated |
| cg00022911 | 0.09133 | 0.284542162 | 1.639482 | 0.000147 | hypermethylated |
| cg15310492 | 0.11752 | 0.366009189 | 1.638974 | 4.15E-05 | hypermethylated |
| cg12527175 | 0.07193 | 0.223868649 | 1.637987 | 3.67E-05 | hypermethylated |
| cg12684209 | 0.10955 | 0.340877297 | 1.637663 | 5.73E-06 | hypermethylated |
| cg03226000 | 0.12987 | 0.404039459 | 1.637428 | 1.52E-05 | hypermethylated |
| cg02728050 | 0.0743  | 0.231105405 | 1.637117 | 2.51E-05 | hypermethylated |

|            |         |             |          |          |                 |
|------------|---------|-------------|----------|----------|-----------------|
| cg01663016 | 0.11242 | 0.349666486 | 1.637081 | 1.09E-05 | hypermethylated |
| cg23168531 | 0.09015 | 0.280284865 | 1.636494 | 9.31E-06 | hypermethylated |
| cg04404540 | 0.0792  | 0.246217297 | 1.63636  | 4.26E-05 | hypermethylated |
| cg19385628 | 0.09732 | 0.302513514 | 1.636191 | 8.42E-05 | hypermethylated |
| cg06419750 | 0.12348 | 0.383667027 | 1.635577 | 0.00018  | hypermethylated |
| cg18679410 | 0.10437 | 0.324275676 | 1.635514 | 4.20E-05 | hypermethylated |
| cg08079908 | 0.14159 | 0.4399      | 1.635456 | 1.62E-05 | hypermethylated |
| cg11841771 | 0.11932 | 0.370672432 | 1.635309 | 7.72E-06 | hypermethylated |
| cg00970396 | 0.13047 | 0.405208649 | 1.634947 | 9.05E-05 | hypermethylated |
| cg22047387 | 0.13038 | 0.404835676 | 1.634614 | 1.80E-05 | hypermethylated |
| cg16794506 | 0.12124 | 0.376388108 | 1.634355 | 1.62E-05 | hypermethylated |
| cg21290042 | 0.09778 | 0.303522162 | 1.634191 | 0.000474 | hypermethylated |
| cg11657203 | 0.07899 | 0.245191351 | 1.634166 | 0.000157 | hypermethylated |
| cg00153106 | 0.10643 | 0.33031027  | 1.633917 | 1.50E-05 | hypermethylated |
| cg11115235 | 0.10957 | 0.340039459 | 1.633849 | 2.85E-05 | hypermethylated |
| cg07003542 | 0.10441 | 0.324005946 | 1.63376  | 0.000124 | hypermethylated |
| cg00872726 | 0.14151 | 0.439118378 | 1.633706 | 5.58E-06 | hypermethylated |
| cg00472801 | 0.08876 | 0.275384324 | 1.633465 | 5.32E-05 | hypermethylated |
| cg15089219 | 0.09053 | 0.280859459 | 1.633381 | 1.37E-05 | hypermethylated |
| cg14328457 | 0.10836 | 0.336136216 | 1.633214 | 3.95E-05 | hypermethylated |
| cg23121156 | 0.1124  | 0.348668108 | 1.633212 | 2.71E-05 | hypermethylated |
| cg09853371 | 0.09636 | 0.298890811 | 1.633112 | 0.000224 | hypermethylated |
| cg03164275 | 0.11193 | 0.347177297 | 1.633076 | 0.000102 | hypermethylated |
| cg22748799 | 0.09146 | 0.283665405 | 1.632977 | 4.94E-05 | hypermethylated |
| cg09980058 | 0.13865 | 0.429996757 | 1.632878 | 1.84E-05 | hypermethylated |
| cg14695492 | 0.11895 | 0.36884     | 1.63264  | 9.31E-06 | hypermethylated |
| cg08737296 | 0.10321 | 0.32003027  | 1.632626 | 5.58E-05 | hypermethylated |
| cg20172500 | 0.07631 | 0.23660973  | 1.632565 | 1.66E-05 | hypermethylated |
| cg25090514 | 0.13614 | 0.422105405 | 1.632512 | 2.79E-06 | hypermethylated |
| cg15992284 | 0.08824 | 0.273587568 | 1.632498 | 2.92E-05 | hypermethylated |
| cg25682299 | 0.07739 | 0.239835676 | 1.631827 | 5.86E-05 | hypermethylated |
| cg25970377 | 0.06633 | 0.205551351 | 1.631765 | 5.45E-05 | hypermethylated |
| cg07401378 | 0.07922 | 0.24546973  | 1.631609 | 3.00E-05 | hypermethylated |
| cg13777717 | 0.103   | 0.319049189 | 1.631135 | 4.36E-06 | hypermethylated |
| cg02798576 | 0.14243 | 0.441182703 | 1.631123 | 2.79E-06 | hypermethylated |
| cg16646743 | 0.07387 | 0.228813514 | 1.631112 | 6.31E-05 | hypermethylated |
| cg01519784 | 0.09887 | 0.30622     | 1.630964 | 5.86E-05 | hypermethylated |
| cg13262687 | 0.10782 | 0.333879459 | 1.630703 | 9.82E-06 | hypermethylated |
| cg09086835 | 0.12449 | 0.385461622 | 1.630557 | 1.09E-06 | hypermethylated |
| cg12103265 | 0.09913 | 0.306837297 | 1.63008  | 5.00E-05 | hypermethylated |
| cg19433697 | 0.11093 | 0.34324973  | 1.629609 | 3.00E-05 | hypermethylated |
| cg19582316 | 0.07869 | 0.243469189 | 1.629487 | 2.21E-05 | hypermethylated |
| cg23448729 | 0.11129 | 0.344236757 | 1.629077 | 3.49E-05 | hypermethylated |
| cg05044185 | 0.09621 | 0.297574595 | 1.628993 | 2.85E-05 | hypermethylated |
| cg25328184 | 0.07805 | 0.241358378 | 1.628706 | 2.27E-05 | hypermethylated |
| cg24190603 | 0.15207 | 0.470135676 | 1.628342 | 2.51E-05 | hypermethylated |
| cg14449051 | 0.09397 | 0.290508649 | 1.628309 | 9.72E-05 | hypermethylated |
| cg22105145 | 0.09476 | 0.292885946 | 1.627989 | 4.93E-06 | hypermethylated |
| cg11708136 | 0.09532 | 0.294421622 | 1.627033 | 1.37E-05 | hypermethylated |
| cg07099331 | 0.13883 | 0.428681622 | 1.626587 | 6.93E-06 | hypermethylated |
| cg06454760 | 0.16707 | 0.515804865 | 1.626373 | 2.92E-05 | hypermethylated |
| cg20170533 | 0.11178 | 0.345053514 | 1.626158 | 0.000117 | hypermethylated |
| cg14448169 | 0.11284 | 0.348217838 | 1.625712 | 7.84E-05 | hypermethylated |
| cg02441747 | 0.08711 | 0.268791892 | 1.625579 | 9.49E-05 | hypermethylated |
| cg14558529 | 0.16158 | 0.4985      | 1.625345 | 3.12E-06 | hypermethylated |
| cg09799983 | 0.16769 | 0.51724973  | 1.625064 | 8.37E-06 | hypermethylated |
| cg02172312 | 0.12039 | 0.371092432 | 1.624063 | 1.71E-05 | hypermethylated |
| cg06847624 | 0.11298 | 0.348219459 | 1.623929 | 5.19E-05 | hypermethylated |



|            |         |             |          |          |                 |
|------------|---------|-------------|----------|----------|-----------------|
| cg04457979 | 0.10516 | 0.32407027  | 1.623721 | 3.90E-06 | hypermethylated |
| cg22274539 | 0.1046  | 0.322343784 | 1.623717 | 0.000138 | hypermethylated |
| cg02767613 | 0.10875 | 0.335074054 | 1.623465 | 4.15E-05 | hypermethylated |
| cg04217778 | 0.12596 | 0.388060541 | 1.623316 | 8.84E-05 | hypermethylated |
| cg02681173 | 0.09396 | 0.289438378 | 1.623138 | 0.000143 | hypermethylated |
| cg06518628 | 0.09704 | 0.298835676 | 1.622701 | 4.05E-05 | hypermethylated |
| cg17397150 | 0.09487 | 0.292122703 | 1.622551 | 2.81E-05 | hypermethylated |
| cg26588943 | 0.081   | 0.249361622 | 1.622246 | 4.15E-05 | hypermethylated |
| cg02058267 | 0.07902 | 0.24317027  | 1.621677 | 1.99E-05 | hypermethylated |
| cg22548438 | 0.08147 | 0.250655135 | 1.621363 | 3.85E-05 | hypermethylated |
| cg12352960 | 0.10438 | 0.321135676 | 1.621338 | 0.000129 | hypermethylated |
| cg23254031 | 0.08097 | 0.249078919 | 1.621144 | 1.06E-05 | hypermethylated |
| cg17285663 | 0.09249 | 0.284502162 | 1.62107  | 0.000185 | hypermethylated |
| cg22471517 | 0.07791 | 0.239652973 | 1.621066 | 1.31E-05 | hypermethylated |
| cg13491462 | 0.07988 | 0.245708108 | 1.621039 | 1.80E-05 | hypermethylated |
| cg24176563 | 0.10068 | 0.309622703 | 1.620734 | 4.00E-05 | hypermethylated |
| cg04711162 | 0.15169 | 0.466467568 | 1.620651 | 3.79E-06 | hypermethylated |
| cg13655674 | 0.10701 | 0.328976216 | 1.620238 | 1.89E-05 | hypermethylated |
| cg15312264 | 0.13939 | 0.42842973  | 1.619932 | 4.24E-06 | hypermethylated |
| cg22679728 | 0.11499 | 0.353264865 | 1.619242 | 1.84E-05 | hypermethylated |
| cg12160317 | 0.10896 | 0.334734595 | 1.619219 | 5.58E-06 | hypermethylated |
| cg25741487 | 0.09379 | 0.288104865 | 1.619088 | 6.66E-06 | hypermethylated |
| cg08566455 | 0.19767 | 0.607168649 | 1.619003 | 2.29E-06 | hypermethylated |
| cg26348902 | 0.09863 | 0.30289027  | 1.618697 | 3.49E-06 | hypermethylated |
| cg16937268 | 0.14815 | 0.454944324 | 1.618631 | 3.90E-06 | hypermethylated |
| cg13161658 | 0.08055 | 0.247317838 | 1.61841  | 1.80E-05 | hypermethylated |
| cg22476848 | 0.06467 | 0.198556757 | 1.618383 | 0.000506 | hypermethylated |
| cg14691529 | 0.08793 | 0.269968649 | 1.618365 | 0.000229 | hypermethylated |
| cg08621473 | 0.11651 | 0.357683784 | 1.618231 | 9.07E-06 | hypermethylated |
| cg04360793 | 0.17458 | 0.535924324 | 1.618141 | 9.57E-06 | hypermethylated |
| cg06158650 | 0.12354 | 0.379221622 | 1.618063 | 3.49E-06 | hypermethylated |
| cg07514158 | 0.11283 | 0.346318919 | 1.61795  | 3.15E-05 | hypermethylated |
| cg07184578 | 0.12842 | 0.39416973  | 1.617947 | 0.000187 | hypermethylated |
| cg03986829 | 0.09426 | 0.289205405 | 1.617377 | 0.000166 | hypermethylated |
| cg14361458 | 0.11579 | 0.355242703 | 1.617294 | 3.79E-06 | hypermethylated |
| cg03585912 | 0.1278  | 0.392049189 | 1.617147 | 1.45E-06 | hypermethylated |
| cg12552771 | 0.11395 | 0.34954     | 1.617057 | 6.39E-06 | hypermethylated |
| cg21528204 | 0.0855  | 0.262256757 | 1.616984 | 2.45E-05 | hypermethylated |
| cg07676859 | 0.15064 | 0.461992432 | 1.616764 | 6.95E-05 | hypermethylated |
| cg15562220 | 0.12573 | 0.38555027  | 1.61659  | 6.78E-05 | hypermethylated |
| cg06574716 | 0.12984 | 0.398069189 | 1.616284 | 4.73E-06 | hypermethylated |
| cg00502665 | 0.09493 | 0.291008649 | 1.616126 | 1.06E-05 | hypermethylated |
| cg16024950 | 0.13856 | 0.424732432 | 1.616043 | 8.83E-06 | hypermethylated |
| cg15731655 | 0.08862 | 0.271637297 | 1.615977 | 0.000135 | hypermethylated |
| cg12087643 | 0.08085 | 0.247702703 | 1.61529  | 0.000138 | hypermethylated |
| cg05732750 | 0.16272 | 0.498439459 | 1.615027 | 1.58E-06 | hypermethylated |
| cg13929627 | 0.08068 | 0.24713027  | 1.614989 | 8.60E-06 | hypermethylated |
| cg07143083 | 0.14685 | 0.449776757 | 1.614866 | 6.22E-06 | hypermethylated |
| cg03640756 | 0.09977 | 0.305575676 | 1.614852 | 1.62E-05 | hypermethylated |
| cg17811778 | 0.09984 | 0.305764324 | 1.61473  | 8.52E-05 | hypermethylated |
| cg14564076 | 0.13729 | 0.420228649 | 1.613948 | 1.75E-05 | hypermethylated |
| cg05844247 | 0.1095  | 0.335133514 | 1.613805 | 5.14E-06 | hypermethylated |
| cg18710784 | 0.12673 | 0.387812432 | 1.613601 | 5.45E-05 | hypermethylated |
| cg12508624 | 0.10987 | 0.336203243 | 1.613536 | 4.31E-05 | hypermethylated |
| cg17300736 | 0.11329 | 0.346547027 | 1.613031 | 1.54E-05 | hypermethylated |
| cg05511722 | 0.0967  | 0.295755676 | 1.612818 | 1.71E-05 | hypermethylated |
| cg04599297 | 0.11584 | 0.354211892 | 1.612479 | 1.35E-05 | hypermethylated |
| cg24575234 | 0.14361 | 0.439115135 | 1.612443 | 8.15E-06 | hypermethylated |

|            |         |             |          |          |                 |
|------------|---------|-------------|----------|----------|-----------------|
| cg22931725 | 0.07746 | 0.236842703 | 1.612406 | 1.12E-05 | hypermethylated |
| cg21725954 | 0.09224 | 0.282012432 | 1.612294 | 3.76E-05 | hypermethylated |
| cg24693551 | 0.09284 | 0.283803784 | 1.612075 | 8.94E-05 | hypermethylated |
| cg02252323 | 0.10152 | 0.310334054 | 1.612058 | 6.75E-06 | hypermethylated |
| cg14799209 | 0.05987 | 0.182944865 | 1.611504 | 1.80E-05 | hypermethylated |
| cg25164649 | 0.09867 | 0.301424865 | 1.611115 | 9.05E-05 | hypermethylated |
| cg04559779 | 0.14381 | 0.439253514 | 1.61089  | 1.21E-05 | hypermethylated |
| cg23998071 | 0.10903 | 0.333016757 | 1.61087  | 7.65E-05 | hypermethylated |
| cg20989855 | 0.09881 | 0.301725405 | 1.610507 | 5.58E-05 | hypermethylated |
| cg05756489 | 0.1018  | 0.31085027  | 1.610482 | 2.18E-05 | hypermethylated |
| cg22374233 | 0.07237 | 0.220961081 | 1.610329 | 5.93E-05 | hypermethylated |
| cg26872137 | 0.11656 | 0.355801081 | 1.609998 | 5.31E-05 | hypermethylated |
| cg24981593 | 0.10052 | 0.306769189 | 1.609671 | 6.15E-05 | hypermethylated |
| cg03281661 | 0.1029  | 0.313982162 | 1.60944  | 1.25E-05 | hypermethylated |
| cg12093775 | 0.11241 | 0.342955135 | 1.609249 | 8.83E-06 | hypermethylated |
| cg22989843 | 0.11759 | 0.358664324 | 1.608869 | 8.83E-06 | hypermethylated |
| cg02036261 | 0.12741 | 0.388563243 | 1.608671 | 7.03E-06 | hypermethylated |
| cg23242052 | 0.10528 | 0.321071351 | 1.608663 | 7.62E-06 | hypermethylated |
| cg12919006 | 0.13109 | 0.399758919 | 1.608573 | 2.27E-05 | hypermethylated |
| cg24693341 | 0.11121 | 0.338952973 | 1.607799 | 1.12E-05 | hypermethylated |
| cg14750948 | 0.16177 | 0.492908108 | 1.607375 | 2.10E-06 | hypermethylated |
| cg19122901 | 0.07602 | 0.231552973 | 1.606891 | 2.48E-05 | hypermethylated |
| cg18173235 | 0.09628 | 0.293176216 | 1.60646  | 0.000165 | hypermethylated |
| cg09699039 | 0.09389 | 0.285835135 | 1.60614  | 9.05E-05 | hypermethylated |
| cg15690342 | 0.13746 | 0.418297297 | 1.605517 | 0.000132 | hypermethylated |
| cg19147218 | 0.11539 | 0.350988649 | 1.604906 | 0.000152 | hypermethylated |
| cg02983163 | 0.13257 | 0.40324     | 1.604884 | 2.10E-06 | hypermethylated |
| cg08005774 | 0.10216 | 0.310725946 | 1.604812 | 1.50E-05 | hypermethylated |
| cg24650501 | 0.08814 | 0.268043784 | 1.6046   | 1.06E-05 | hypermethylated |
| cg12296772 | 0.16459 | 0.500520541 | 1.604553 | 3.07E-05 | hypermethylated |
| cg21533331 | 0.08601 | 0.261503784 | 1.604256 | 1.54E-05 | hypermethylated |
| cg00467420 | 0.0884  | 0.268761081 | 1.604206 | 9.05E-05 | hypermethylated |
| cg17236169 | 0.12495 | 0.379793514 | 1.603864 | 1.75E-05 | hypermethylated |
| cg08404009 | 0.09528 | 0.289594054 | 1.603787 | 1.21E-05 | hypermethylated |
| cg01482645 | 0.10775 | 0.327484865 | 1.60374  | 6.78E-05 | hypermethylated |
| cg15237494 | 0.12369 | 0.375893514 | 1.603595 | 2.85E-05 | hypermethylated |
| cg05387399 | 0.1061  | 0.322340541 | 1.603161 | 1.09E-05 | hypermethylated |
| cg18685561 | 0.12296 | 0.373543243 | 1.603086 | 8.60E-06 | hypermethylated |
| cg25549459 | 0.09906 | 0.300907027 | 1.602943 | 1.75E-05 | hypermethylated |
| cg10023530 | 0.11068 | 0.336131892 | 1.602633 | 5.65E-06 | hypermethylated |
| cg04479219 | 0.11837 | 0.359462703 | 1.602539 | 5.14E-06 | hypermethylated |
| cg07073391 | 0.11548 | 0.35062     | 1.602265 | 2.64E-05 | hypermethylated |
| cg01630690 | 0.13131 | 0.39868     | 1.602254 | 8.71E-06 | hypermethylated |
| cg20881942 | 0.12876 | 0.390913514 | 1.602165 | 2.96E-05 | hypermethylated |
| cg19595505 | 0.11779 | 0.357583243 | 1.602062 | 7.52E-06 | hypermethylated |
| cg19512268 | 0.11163 | 0.338761081 | 1.601543 | 9.72E-05 | hypermethylated |
| cg03323462 | 0.1247  | 0.378378919 | 1.60137  | 1.42E-05 | hypermethylated |
| cg00035316 | 0.12525 | 0.379983243 | 1.601125 | 4.60E-06 | hypermethylated |
| cg08428452 | 0.08289 | 0.251443784 | 1.600966 | 3.11E-05 | hypermethylated |
| cg06330691 | 0.093   | 0.282094054 | 1.600874 | 2.07E-05 | hypermethylated |
| cg15964309 | 0.09732 | 0.295109189 | 1.600441 | 5.19E-05 | hypermethylated |
| cg03031609 | 0.08365 | 0.253587027 | 1.600043 | 2.35E-05 | hypermethylated |
| cg17657179 | 0.12301 | 0.372897838 | 1.600005 | 3.23E-05 | hypermethylated |
| cg04853843 | 0.11206 | 0.339698378 | 1.599983 | 9.19E-06 | hypermethylated |
| cg20897830 | 0.13972 | 0.423428108 | 1.599578 | 3.69E-06 | hypermethylated |
| cg20519121 | 0.08476 | 0.256844865 | 1.599442 | 5.58E-05 | hypermethylated |
| cg18867480 | 0.09082 | 0.275179459 | 1.599291 | 1.94E-05 | hypermethylated |
| cg06372303 | 0.07819 | 0.236907027 | 1.599265 | 1.17E-05 | hypermethylated |

|            |         |             |          |          |                 |
|------------|---------|-------------|----------|----------|-----------------|
| cg12756396 | 0.13591 | 0.411758378 | 1.599146 | 2.64E-06 | hypermethylated |
| cg11751707 | 0.10623 | 0.321811351 | 1.599024 | 6.23E-05 | hypermethylated |
| cg03882167 | 0.1181  | 0.357621622 | 1.598425 | 6.15E-05 | hypermethylated |
| cg05016408 | 0.11918 | 0.360808649 | 1.598092 | 0.000107 | hypermethylated |
| cg03171361 | 0.0959  | 0.290284324 | 1.597864 | 4.58E-05 | hypermethylated |
| cg25563456 | 0.09795 | 0.296356757 | 1.597218 | 3.64E-06 | hypermethylated |
| cg12997720 | 0.13377 | 0.404681081 | 1.597031 | 3.67E-05 | hypermethylated |
| cg00181125 | 0.1142  | 0.345440541 | 1.596875 | 2.32E-05 | hypermethylated |
| cg11891395 | 0.1171  | 0.354203784 | 1.596839 | 2.51E-05 | hypermethylated |
| cg11710851 | 0.10785 | 0.326176216 | 1.596625 | 0.000152 | hypermethylated |
| cg00332937 | 0.12972 | 0.39229027  | 1.596521 | 7.52E-06 | hypermethylated |
| cg16415870 | 0.10443 | 0.315792432 | 1.59644  | 5.06E-05 | hypermethylated |
| cg24608684 | 0.09128 | 0.275991892 | 1.596255 | 0.000143 | hypermethylated |
| cg19020830 | 0.08318 | 0.25146973  | 1.596076 | 6.75E-06 | hypermethylated |
| cg09526758 | 0.10178 | 0.307502162 | 1.595142 | 1.84E-05 | hypermethylated |
| cg24837370 | 0.18356 | 0.554572973 | 1.595126 | 5.89E-06 | hypermethylated |
| cg02541778 | 0.12127 | 0.366368649 | 1.595073 | 0.000126 | hypermethylated |
| cg11998703 | 0.09399 | 0.283922162 | 1.594916 | 9.82E-06 | hypermethylated |
| cg12818557 | 0.14351 | 0.433508649 | 1.59491  | 0.000256 | hypermethylated |
| cg13574121 | 0.09486 | 0.286511351 | 1.594721 | 2.27E-05 | hypermethylated |
| cg01033865 | 0.09728 | 0.293654595 | 1.593905 | 3.57E-05 | hypermethylated |
| cg22648135 | 0.11842 | 0.357384324 | 1.593564 | 3.79E-06 | hypermethylated |
| cg03876413 | 0.09816 | 0.296054595 | 1.592656 | 2.85E-05 | hypermethylated |
| cg23839136 | 0.12702 | 0.383082162 | 1.592598 | 3.69E-06 | hypermethylated |
| cg04222358 | 0.13333 | 0.402106486 | 1.592576 | 1.21E-05 | hypermethylated |
| cg08107689 | 0.12305 | 0.371037838 | 1.592322 | 4.18E-06 | hypermethylated |
| cg02164225 | 0.09348 | 0.281822703 | 1.592058 | 2.45E-05 | hypermethylated |
| cg22717227 | 0.08502 | 0.256154595 | 1.591141 | 8.60E-06 | hypermethylated |
| cg07142201 | 0.10479 | 0.315635676 | 1.590759 | 1.77E-05 | hypermethylated |
| cg01577751 | 0.1006  | 0.303010811 | 1.590739 | 1.25E-05 | hypermethylated |
| cg15628917 | 0.09662 | 0.291013514 | 1.590692 | 2.74E-05 | hypermethylated |
| cg26239391 | 0.09803 | 0.295213514 | 1.590464 | 1.01E-05 | hypermethylated |
| cg03442425 | 0.12435 | 0.374430811 | 1.590293 | 6.46E-05 | hypermethylated |
| cg15412759 | 0.12249 | 0.368729189 | 1.589898 | 1.35E-05 | hypermethylated |
| cg22335876 | 0.14363 | 0.432362703 | 1.589885 | 1.42E-05 | hypermethylated |
| cg04032066 | 0.11829 | 0.356054595 | 1.58977  | 1.31E-05 | hypermethylated |
| cg06549216 | 0.07586 | 0.228335135 | 1.589742 | 2.81E-05 | hypermethylated |
| cg01796166 | 0.14568 | 0.438468108 | 1.589669 | 2.87E-06 | hypermethylated |
| cg11793269 | 0.10922 | 0.328643243 | 1.589285 | 7.32E-06 | hypermethylated |
| cg03936663 | 0.14338 | 0.43142     | 1.589249 | 2.10E-06 | hypermethylated |
| cg15160263 | 0.08794 | 0.264594054 | 1.589189 | 4.58E-05 | hypermethylated |
| cg17029062 | 0.08478 | 0.255076757 | 1.589136 | 9.38E-05 | hypermethylated |
| cg26300652 | 0.11267 | 0.338842162 | 1.58851  | 8.95E-06 | hypermethylated |
| cg02674384 | 0.10863 | 0.326513514 | 1.58772  | 0.000187 | hypermethylated |
| cg06419850 | 0.12546 | 0.377077838 | 1.587635 | 2.71E-06 | hypermethylated |
| cg11366849 | 0.15716 | 0.472296757 | 1.58746  | 8.60E-06 | hypermethylated |
| cg02430935 | 0.12125 | 0.364146486 | 1.586534 | 2.21E-05 | hypermethylated |
| cg04859466 | 0.10534 | 0.316357838 | 1.586504 | 1.87E-05 | hypermethylated |
| cg16783744 | 0.14616 | 0.438929189 | 1.58644  | 3.21E-06 | hypermethylated |
| cg08091192 | 0.11951 | 0.358885405 | 1.586392 | 1.94E-05 | hypermethylated |
| cg02442509 | 0.08102 | 0.243268108 | 1.586197 | 1.01E-05 | hypermethylated |
| cg06212175 | 0.09638 | 0.28936973  | 1.586108 | 0.000216 | hypermethylated |
| cg18297437 | 0.12702 | 0.381345946 | 1.586045 | 9.31E-06 | hypermethylated |
| cg00481629 | 0.09837 | 0.295298378 | 1.585883 | 0.000145 | hypermethylated |
| cg08620154 | 0.12239 | 0.367354054 | 1.585686 | 4.47E-05 | hypermethylated |
| cg01598250 | 0.0836  | 0.250924324 | 1.585677 | 1.93E-06 | hypermethylated |
| cg19329160 | 0.12764 | 0.383048108 | 1.585445 | 1.09E-05 | hypermethylated |
| cg20347882 | 0.10887 | 0.326712432 | 1.585415 | 3.79E-06 | hypermethylated |

|            |         |             |          |          |                 |
|------------|---------|-------------|----------|----------|-----------------|
| cg09229912 | 0.112   | 0.336056216 | 1.585204 | 4.15E-05 | hypermethylated |
| cg14265823 | 0.1222  | 0.366652973 | 1.585171 | 4.47E-05 | hypermethylated |
| cg00919971 | 0.11382 | 0.341504865 | 1.585152 | 1.28E-05 | hypermethylated |
| cg01851378 | 0.16397 | 0.491962162 | 1.585115 | 4.80E-06 | hypermethylated |
| cg08889797 | 0.11206 | 0.336191892 | 1.585014 | 4.42E-06 | hypermethylated |
| cg17892178 | 0.12343 | 0.370276757 | 1.584911 | 1.58E-05 | hypermethylated |
| cg20462512 | 0.11167 | 0.33494973  | 1.584703 | 8.83E-06 | hypermethylated |
| cg12378187 | 0.13569 | 0.406995676 | 1.584699 | 6.05E-06 | hypermethylated |
| cg24309428 | 0.09731 | 0.291814595 | 1.584392 | 3.85E-05 | hypermethylated |
| cg23877720 | 0.096   | 0.287883243 | 1.584378 | 6.75E-06 | hypermethylated |
| cg05186311 | 0.10529 | 0.315717838 | 1.584267 | 3.26E-06 | hypermethylated |
| cg24000873 | 0.10628 | 0.318655135 | 1.584126 | 1.71E-05 | hypermethylated |
| cg02730156 | 0.08772 | 0.262988108 | 1.58402  | 5.65E-06 | hypermethylated |
| cg21546184 | 0.10958 | 0.328475676 | 1.583802 | 1.54E-05 | hypermethylated |
| cg20486569 | 0.10694 | 0.320531892 | 1.583666 | 1.06E-05 | hypermethylated |
| cg21769640 | 0.14065 | 0.421513514 | 1.583469 | 5.89E-06 | hypermethylated |
| cg01381846 | 0.18366 | 0.550408649 | 1.583466 | 2.10E-06 | hypermethylated |
| cg11750165 | 0.11936 | 0.357624865 | 1.583128 | 5.58E-06 | hypermethylated |
| cg26660002 | 0.0966  | 0.289396216 | 1.582951 | 9.72E-05 | hypermethylated |
| cg15855970 | 0.09055 | 0.271215676 | 1.582654 | 1.46E-05 | hypermethylated |
| cg00364016 | 0.10354 | 0.31008973  | 1.582498 | 8.15E-06 | hypermethylated |
| cg24133115 | 0.10745 | 0.32176973  | 1.582363 | 0.00035  | hypermethylated |
| cg19258062 | 0.14014 | 0.419633514 | 1.582261 | 7.93E-06 | hypermethylated |
| cg00100012 | 0.10802 | 0.323408649 | 1.58206  | 9.69E-06 | hypermethylated |
| cg16249035 | 0.06828 | 0.204425405 | 1.58204  | 7.93E-06 | hypermethylated |
| cg25750389 | 0.07626 | 0.228283243 | 1.581827 | 3.54E-06 | hypermethylated |
| cg11611600 | 0.0816  | 0.244137838 | 1.581055 | 1.20E-05 | hypermethylated |
| cg27112565 | 0.10538 | 0.315261622 | 1.580948 | 9.72E-05 | hypermethylated |
| cg08462988 | 0.12264 | 0.366874595 | 1.580857 | 1.06E-05 | hypermethylated |
| cg24047377 | 0.07875 | 0.235575676 | 1.580839 | 0.000119 | hypermethylated |
| cg26950557 | 0.09344 | 0.279446486 | 1.58046  | 5.93E-05 | hypermethylated |
| cg05474726 | 0.12851 | 0.384168649 | 1.579859 | 5.72E-05 | hypermethylated |
| cg15060012 | 0.1108  | 0.331204865 | 1.579766 | 2.89E-05 | hypermethylated |
| cg25084878 | 0.10766 | 0.321813514 | 1.579743 | 4.15E-05 | hypermethylated |
| cg22190437 | 0.11234 | 0.335725946 | 1.579412 | 1.89E-05 | hypermethylated |
| cg27042584 | 0.11961 | 0.357445946 | 1.579387 | 1.01E-05 | hypermethylated |
| cg07211140 | 0.08352 | 0.249563243 | 1.579212 | 2.81E-05 | hypermethylated |
| cg13572145 | 0.08691 | 0.259677297 | 1.579126 | 7.72E-06 | hypermethylated |
| cg08445263 | 0.12907 | 0.385616216 | 1.579012 | 1.04E-05 | hypermethylated |
| cg17078427 | 0.0814  | 0.243091351 | 1.578398 | 1.25E-05 | hypermethylated |
| cg26421310 | 0.11028 | 0.329275135 | 1.578122 | 0.00221  | hypermethylated |
| cg03810428 | 0.09665 | 0.28846973  | 1.577578 | 4.05E-05 | hypermethylated |
| cg01060089 | 0.06056 | 0.180746486 | 1.57753  | 6.54E-05 | hypermethylated |
| cg15836660 | 0.08123 | 0.242405405 | 1.577337 | 1.46E-05 | hypermethylated |
| cg02466815 | 0.13808 | 0.412047568 | 1.577307 | 1.15E-05 | hypermethylated |
| cg01933308 | 0.10581 | 0.31572     | 1.57717  | 0.000195 | hypermethylated |
| cg05863502 | 0.15554 | 0.464044324 | 1.576977 | 5.58E-06 | hypermethylated |
| cg23288059 | 0.09944 | 0.296586486 | 1.576555 | 3.07E-05 | hypermethylated |
| cg16823083 | 0.14901 | 0.444430811 | 1.57655  | 8.15E-06 | hypermethylated |
| cg14582763 | 0.12782 | 0.381080541 | 1.575982 | 2.92E-05 | hypermethylated |
| cg19206146 | 0.15757 | 0.469702162 | 1.575753 | 3.04E-06 | hypermethylated |
| cg15590989 | 0.11024 | 0.328396216 | 1.57479  | 9.57E-06 | hypermethylated |
| cg14983606 | 0.11164 | 0.332542162 | 1.574683 | 5.86E-05 | hypermethylated |
| cg19517718 | 0.10919 | 0.325212432 | 1.574542 | 2.64E-06 | hypermethylated |
| cg15397374 | 0.10204 | 0.303883243 | 1.574382 | 7.65E-05 | hypermethylated |
| cg17459204 | 0.11988 | 0.357005946 | 1.574357 | 0.000224 | hypermethylated |
| cg04954680 | 0.10199 | 0.303695135 | 1.574196 | 4.05E-05 | hypermethylated |
| cg21444693 | 0.10513 | 0.313028649 | 1.57412  | 7.84E-05 | hypermethylated |

|            |         |             |          |          |                 |
|------------|---------|-------------|----------|----------|-----------------|
| cg17199800 | 0.12677 | 0.377422162 | 1.573966 | 1.51E-06 | hypermethylated |
| cg24871414 | 0.13228 | 0.393821081 | 1.573945 | 9.82E-06 | hypermethylated |
| cg22687748 | 0.07933 | 0.236045946 | 1.573129 | 6.46E-05 | hypermethylated |
| cg12109455 | 0.08405 | 0.250023784 | 1.572746 | 6.93E-06 | hypermethylated |
| cg00792424 | 0.12713 | 0.378158919 | 1.572688 | 5.28E-06 | hypermethylated |
| cg12431879 | 0.12566 | 0.373750811 | 1.572551 | 1.46E-05 | hypermethylated |
| cg25865467 | 0.07546 | 0.224440541 | 1.572549 | 5.79E-05 | hypermethylated |
| cg01146232 | 0.13686 | 0.40704     | 1.57247  | 5.73E-06 | hypermethylated |
| cg20076842 | 0.09761 | 0.290232973 | 1.572111 | 8.15E-06 | hypermethylated |
| cg24778248 | 0.09235 | 0.27458973  | 1.572094 | 2.10E-05 | hypermethylated |
| cg04386206 | 0.09127 | 0.27134973  | 1.571941 | 4.70E-05 | hypermethylated |
| cg18603028 | 0.1197  | 0.355860541 | 1.571889 | 3.30E-06 | hypermethylated |
| cg21012296 | 0.11804 | 0.350891892 | 1.571751 | 6.86E-05 | hypermethylated |
| cg01328892 | 0.1169  | 0.347458378 | 1.571565 | 0.000103 | hypermethylated |
| cg12189551 | 0.10606 | 0.315205405 | 1.571412 | 4.15E-05 | hypermethylated |
| cg11362010 | 0.11139 | 0.330992432 | 1.571179 | 5.72E-05 | hypermethylated |
| cg19469447 | 0.10872 | 0.323018919 | 1.571001 | 0.000112 | hypermethylated |
| cg13893543 | 0.1026  | 0.304791892 | 1.570794 | 2.64E-06 | hypermethylated |
| cg22961278 | 0.1095  | 0.325221622 | 1.570492 | 0.000142 | hypermethylated |
| cg02589791 | 0.13099 | 0.389008649 | 1.570346 | 3.04E-05 | hypermethylated |
| cg03442378 | 0.11047 | 0.328       | 1.570041 | 1.35E-05 | hypermethylated |
| cg19949955 | 0.13069 | 0.387995676 | 1.569892 | 1.31E-05 | hypermethylated |
| cg20717123 | 0.13493 | 0.400530811 | 1.569702 | 8.15E-06 | hypermethylated |
| cg08252579 | 0.09913 | 0.294226486 | 1.569533 | 1.62E-05 | hypermethylated |
| cg25415246 | 0.14204 | 0.42150973  | 1.569269 | 6.05E-06 | hypermethylated |
| cg13021619 | 0.09174 | 0.272222162 | 1.569162 | 7.12E-05 | hypermethylated |
| cg27006650 | 0.07591 | 0.225185946 | 1.568755 | 7.52E-06 | hypermethylated |
| cg04181150 | 0.09588 | 0.284378378 | 1.56851  | 1.56E-05 | hypermethylated |
| cg21784917 | 0.0887  | 0.263064865 | 1.568413 | 0.000137 | hypermethylated |
| cg08495770 | 0.09938 | 0.294652432 | 1.567987 | 3.57E-05 | hypermethylated |
| cg26667205 | 0.10949 | 0.324556216 | 1.567669 | 9.16E-05 | hypermethylated |
| cg04227961 | 0.16473 | 0.488141622 | 1.567196 | 1.12E-05 | hypermethylated |
| cg23191956 | 0.12162 | 0.360347568 | 1.567009 | 4.73E-06 | hypermethylated |
| cg19988449 | 0.12282 | 0.363677838 | 1.566116 | 8.10E-07 | hypermethylated |
| cg20890210 | 0.10508 | 0.311063243 | 1.56572  | 9.72E-05 | hypermethylated |
| cg02571636 | 0.13376 | 0.395943784 | 1.565649 | 5.93E-05 | hypermethylated |
| cg15393937 | 0.13081 | 0.387102162 | 1.565242 | 8.03E-05 | hypermethylated |
| cg08432727 | 0.10636 | 0.314685405 | 1.564955 | 3.90E-06 | hypermethylated |
| cg05976714 | 0.11635 | 0.344231351 | 1.564907 | 0.000108 | hypermethylated |
| cg04748834 | 0.10989 | 0.325059459 | 1.564644 | 4.05E-05 | hypermethylated |
| cg11859607 | 0.13377 | 0.395456757 | 1.563765 | 5.89E-06 | hypermethylated |
| cg01583131 | 0.10787 | 0.318865946 | 1.563656 | 1.18E-05 | hypermethylated |
| cg01371799 | 0.12004 | 0.354835676 | 1.563636 | 4.36E-05 | hypermethylated |
| cg17437939 | 0.13661 | 0.403798378 | 1.563572 | 5.86E-05 | hypermethylated |
| cg04018622 | 0.08424 | 0.248973514 | 1.563415 | 4.80E-06 | hypermethylated |
| cg11596580 | 0.07923 | 0.234115676 | 1.563103 | 2.32E-05 | hypermethylated |
| cg01568998 | 0.10365 | 0.306096757 | 1.562268 | 1.82E-05 | hypermethylated |
| cg21869586 | 0.09258 | 0.273382703 | 1.562149 | 1.42E-05 | hypermethylated |
| cg15814504 | 0.12642 | 0.373271351 | 1.562    | 5.86E-05 | hypermethylated |
| cg13818654 | 0.08484 | 0.250478378 | 1.56187  | 5.45E-05 | hypermethylated |
| cg14576896 | 0.09429 | 0.27829027  | 1.561414 | 2.71E-05 | hypermethylated |
| cg02773433 | 0.08014 | 0.236509189 | 1.561302 | 0.000142 | hypermethylated |
| cg13596497 | 0.11099 | 0.327525405 | 1.561177 | 1.52E-05 | hypermethylated |
| cg20581321 | 0.1171  | 0.345532432 | 1.56108  | 1.46E-05 | hypermethylated |
| cg22195627 | 0.13276 | 0.391682162 | 1.560863 | 0.000293 | hypermethylated |
| cg22016949 | 0.13067 | 0.385513514 | 1.560853 | 4.01E-06 | hypermethylated |
| cg17165841 | 0.12029 | 0.354633514 | 1.559812 | 7.72E-06 | hypermethylated |
| cg04251368 | 0.10491 | 0.309236757 | 1.55956  | 3.07E-05 | hypermethylated |

|            |         |             |          |          |                 |
|------------|---------|-------------|----------|----------|-----------------|
| cg05733181 | 0.10628 | 0.313216216 | 1.559289 | 3.44E-05 | hypermethylated |
| cg10074775 | 0.10583 | 0.311823243 | 1.55898  | 4.64E-05 | hypermethylated |
| cg17772342 | 0.10064 | 0.296521081 | 1.558931 | 3.67E-05 | hypermethylated |
| cg21485303 | 0.12468 | 0.36731027  | 1.558769 | 8.37E-06 | hypermethylated |
| cg06459847 | 0.09392 | 0.276685405 | 1.558742 | 1.33E-05 | hypermethylated |
| cg01078989 | 0.08498 | 0.250257297 | 1.558217 | 2.35E-05 | hypermethylated |
| cg20962117 | 0.08899 | 0.262043784 | 1.558093 | 5.00E-05 | hypermethylated |
| cg08734647 | 0.12128 | 0.357121622 | 1.558074 | 5.25E-05 | hypermethylated |
| cg07731304 | 0.09092 | 0.267722162 | 1.558067 | 3.44E-05 | hypermethylated |
| cg17319774 | 0.08681 | 0.255569189 | 1.557781 | 7.22E-06 | hypermethylated |
| cg11311843 | 0.15342 | 0.451663243 | 1.557761 | 0.00012  | hypermethylated |
| cg22457238 | 0.10222 | 0.300914054 | 1.557674 | 1.12E-05 | hypermethylated |
| cg15466862 | 0.11481 | 0.337968108 | 1.557639 | 8.15E-06 | hypermethylated |
| cg18247055 | 0.15041 | 0.442644865 | 1.557249 | 7.93E-06 | hypermethylated |
| cg05209584 | 0.13949 | 0.41036973  | 1.556763 | 8.37E-06 | hypermethylated |
| cg15784124 | 0.08334 | 0.24516     | 1.556643 | 1.12E-05 | hypermethylated |
| cg11012061 | 0.12112 | 0.35627027  | 1.556535 | 1.07E-06 | hypermethylated |
| cg07274716 | 0.16399 | 0.482029189 | 1.555513 | 1.45E-06 | hypermethylated |
| cg21609106 | 0.11279 | 0.331105405 | 1.553651 | 5.86E-05 | hypermethylated |
| cg07760204 | 0.08739 | 0.256463784 | 1.553215 | 1.28E-05 | hypermethylated |
| cg17012160 | 0.12175 | 0.357273514 | 1.553107 | 2.27E-05 | hypermethylated |
| cg03881775 | 0.12932 | 0.379447027 | 1.552953 | 6.75E-06 | hypermethylated |
| cg21543987 | 0.09514 | 0.279128649 | 1.552806 | 9.95E-05 | hypermethylated |
| cg22881652 | 0.09531 | 0.279609189 | 1.552712 | 2.96E-05 | hypermethylated |
| cg00123055 | 0.13669 | 0.400941622 | 1.552484 | 2.36E-06 | hypermethylated |
| cg06722633 | 0.10651 | 0.312385405 | 1.552338 | 4.73E-06 | hypermethylated |
| cg22732749 | 0.11436 | 0.335387027 | 1.552244 | 1.58E-05 | hypermethylated |
| cg14486338 | 0.18457 | 0.541183784 | 1.551951 | 2.16E-06 | hypermethylated |
| cg13647155 | 0.11527 | 0.337738919 | 1.550891 | 0.000132 | hypermethylated |
| cg13786089 | 0.12215 | 0.357851351 | 1.550707 | 2.15E-05 | hypermethylated |
| cg11945824 | 0.16694 | 0.489048108 | 1.550647 | 1.65E-06 | hypermethylated |
| cg02064106 | 0.10257 | 0.300405946 | 1.550305 | 0.000268 | hypermethylated |
| cg10320659 | 0.13208 | 0.386727568 | 1.549906 | 4.82E-05 | hypermethylated |
| cg01597641 | 0.13614 | 0.398588649 | 1.54981  | 5.45E-05 | hypermethylated |
| cg11667086 | 0.11593 | 0.339362162 | 1.549572 | 3.79E-06 | hypermethylated |
| cg21547690 | 0.13439 | 0.393331892 | 1.549321 | 1.58E-05 | hypermethylated |
| cg02792792 | 0.11792 | 0.345065946 | 1.549064 | 3.76E-05 | hypermethylated |
| cg24333192 | 0.09951 | 0.290983243 | 1.548023 | 5.19E-05 | hypermethylated |
| cg15237923 | 0.09323 | 0.272608108 | 1.547962 | 7.52E-06 | hypermethylated |
| cg21434530 | 0.1242  | 0.363148649 | 1.547895 | 6.01E-05 | hypermethylated |
| cg04698114 | 0.14798 | 0.4325      | 1.547298 | 1.80E-05 | hypermethylated |
| cg02662277 | 0.10232 | 0.299046486 | 1.547282 | 0.000159 | hypermethylated |
| cg27443071 | 0.13363 | 0.390528649 | 1.547184 | 1.15E-05 | hypermethylated |
| cg02613418 | 0.09562 | 0.279410811 | 1.547004 | 1.84E-05 | hypermethylated |
| cg04180086 | 0.12912 | 0.377276216 | 1.546909 | 3.74E-06 | hypermethylated |
| cg15762032 | 0.1025  | 0.299473514 | 1.546805 | 4.36E-05 | hypermethylated |
| cg20266316 | 0.14101 | 0.411981622 | 1.546783 | 2.51E-05 | hypermethylated |
| cg02895639 | 0.12495 | 0.365039459 | 1.546702 | 0.000224 | hypermethylated |
| cg20277905 | 0.11983 | 0.349991892 | 1.546332 | 2.95E-06 | hypermethylated |
| cg15549927 | 0.14454 | 0.422152432 | 1.546295 | 4.36E-06 | hypermethylated |
| cg25901381 | 0.10715 | 0.312923784 | 1.546179 | 5.58E-06 | hypermethylated |
| cg26385172 | 0.12919 | 0.377235676 | 1.545972 | 1.12E-05 | hypermethylated |
| cg20676716 | 0.12719 | 0.371321081 | 1.545682 | 5.58E-05 | hypermethylated |
| cg13791254 | 0.17436 | 0.508875135 | 1.545243 | 3.15E-05 | hypermethylated |
| cg08097882 | 0.1153  | 0.336458919 | 1.545038 | 7.65E-05 | hypermethylated |
| cg12514789 | 0.11761 | 0.342934595 | 1.543923 | 1.70E-06 | hypermethylated |
| cg16023545 | 0.10329 | 0.301079459 | 1.543444 | 0.000335 | hypermethylated |
| cg01019587 | 0.15299 | 0.445877297 | 1.543209 | 7.93E-06 | hypermethylated |

|            |         |             |          |          |                 |
|------------|---------|-------------|----------|----------|-----------------|
| cg12520549 | 0.09911 | 0.288835135 | 1.543144 | 4.48E-06 | hypermethylated |
| cg14907769 | 0.14725 | 0.429100541 | 1.543048 | 1.73E-05 | hypermethylated |
| cg15175143 | 0.12186 | 0.355099459 | 1.542999 | 0.000109 | hypermethylated |
| cg13526007 | 0.10712 | 0.312139459 | 1.542963 | 6.78E-05 | hypermethylated |
| cg02825211 | 0.1395  | 0.406294595 | 1.542261 | 5.19E-05 | hypermethylated |
| cg14262681 | 0.16463 | 0.479456757 | 1.542173 | 0.000667 | hypermethylated |
| cg20405017 | 0.16062 | 0.467722162 | 1.542    | 8.37E-06 | hypermethylated |
| cg15060599 | 0.16196 | 0.471507027 | 1.541642 | 4.36E-06 | hypermethylated |
| cg03570636 | 0.09338 | 0.271848649 | 1.541618 | 5.00E-06 | hypermethylated |
| cg11324832 | 0.12043 | 0.350476216 | 1.541122 | 1.58E-05 | hypermethylated |
| cg06757662 | 0.09936 | 0.28914     | 1.541031 | 5.72E-05 | hypermethylated |
| cg20504856 | 0.07166 | 0.208524324 | 1.540976 | 6.62E-05 | hypermethylated |
| cg12741420 | 0.11067 | 0.321934054 | 1.540501 | 3.85E-05 | hypermethylated |
| cg17269633 | 0.17211 | 0.500653514 | 1.540482 | 2.07E-06 | hypermethylated |
| cg12004787 | 0.12949 | 0.376612432 | 1.54024  | 1.40E-05 | hypermethylated |
| cg26327666 | 0.16648 | 0.484105405 | 1.539972 | 9.96E-06 | hypermethylated |
| cg21179088 | 0.18627 | 0.541643784 | 1.539949 | 6.22E-06 | hypermethylated |
| cg01910869 | 0.08974 | 0.260934054 | 1.539862 | 1.23E-05 | hypermethylated |
| cg22546168 | 0.11782 | 0.342567568 | 1.539804 | 0.000132 | hypermethylated |
| cg19149681 | 0.107   | 0.311092973 | 1.539735 | 2.15E-05 | hypermethylated |
| cg14782672 | 0.10885 | 0.316447568 | 1.539625 | 4.01E-06 | hypermethylated |
| cg23842255 | 0.12341 | 0.358696216 | 1.539303 | 2.56E-06 | hypermethylated |
| cg15235798 | 0.13585 | 0.394824865 | 1.539198 | 1.39E-05 | hypermethylated |
| cg06943420 | 0.12223 | 0.355114054 | 1.538684 | 0.000653 | hypermethylated |
| cg21186708 | 0.11523 | 0.334728649 | 1.538476 | 1.99E-05 | hypermethylated |
| cg26517714 | 0.12829 | 0.372614595 | 1.538275 | 1.63E-06 | hypermethylated |
| cg11626496 | 0.1318  | 0.382804324 | 1.538257 | 4.48E-06 | hypermethylated |
| cg10406124 | 0.12993 | 0.377320541 | 1.538056 | 4.86E-06 | hypermethylated |
| cg20892260 | 0.13914 | 0.404028108 | 1.537918 | 3.07E-05 | hypermethylated |
| cg15347189 | 0.12899 | 0.374552432 | 1.537908 | 6.05E-06 | hypermethylated |
| cg26170569 | 0.14206 | 0.412373514 | 1.537451 | 8.26E-06 | hypermethylated |
| cg15841063 | 0.14219 | 0.412744324 | 1.537428 | 0.000219 | hypermethylated |
| cg17252960 | 0.11553 | 0.335187027 | 1.536699 | 1.99E-05 | hypermethylated |
| cg10358981 | 0.12959 | 0.375961081 | 1.536629 | 6.46E-05 | hypermethylated |
| cg07531268 | 0.09991 | 0.289771351 | 1.536214 | 9.38E-05 | hypermethylated |
| cg08259925 | 0.08289 | 0.240374595 | 1.536014 | 5.19E-05 | hypermethylated |
| cg08383399 | 0.12021 | 0.348591892 | 1.535982 | 7.29E-05 | hypermethylated |
| cg26720125 | 0.10419 | 0.302115676 | 1.535884 | 4.47E-05 | hypermethylated |
| cg09626193 | 0.09082 | 0.263229189 | 1.535238 | 9.05E-05 | hypermethylated |
| cg22325703 | 0.07154 | 0.207294054 | 1.534857 | 0.00017  | hypermethylated |
| cg27595860 | 0.13196 | 0.382340541 | 1.534757 | 1.62E-05 | hypermethylated |
| cg19326876 | 0.10111 | 0.292931892 | 1.53464  | 8.52E-05 | hypermethylated |
| cg27403635 | 0.13743 | 0.3981      | 1.534434 | 0.000112 | hypermethylated |
| cg12640000 | 0.10568 | 0.306092973 | 1.534268 | 5.43E-06 | hypermethylated |
| cg13272644 | 0.11946 | 0.345997838 | 1.534235 | 3.79E-06 | hypermethylated |
| cg20051292 | 0.12123 | 0.351106486 | 1.534162 | 1.80E-05 | hypermethylated |
| cg03166753 | 0.0987  | 0.285843243 | 1.534102 | 0.000667 | hypermethylated |
| cg07341290 | 0.09799 | 0.283783784 | 1.534086 | 0.000178 | hypermethylated |
| cg06424065 | 0.15824 | 0.458263784 | 1.534064 | 1.12E-05 | hypermethylated |
| cg03707776 | 0.07166 | 0.207512432 | 1.533958 | 4.86E-06 | hypermethylated |
| cg06531379 | 0.11915 | 0.345027568 | 1.533933 | 2.71E-05 | hypermethylated |
| cg16203491 | 0.09426 | 0.272946486 | 1.533901 | 3.32E-05 | hypermethylated |
| cg07837260 | 0.12796 | 0.370527027 | 1.533886 | 4.82E-05 | hypermethylated |
| cg19555331 | 0.10497 | 0.303929189 | 1.533758 | 9.82E-06 | hypermethylated |
| cg10700564 | 0.11085 | 0.320898378 | 1.533508 | 3.19E-05 | hypermethylated |
| cg01625087 | 0.12074 | 0.349474595 | 1.533284 | 4.47E-05 | hypermethylated |
| cg21127286 | 0.08604 | 0.249016216 | 1.53316  | 2.04E-05 | hypermethylated |
| cg06545143 | 0.08853 | 0.256221622 | 1.533154 | 1.21E-05 | hypermethylated |

|            |         |             |          |          |                 |
|------------|---------|-------------|----------|----------|-----------------|
| cg12164321 | 0.12628 | 0.365354054 | 1.532669 | 1.84E-05 | hypermethylated |
| cg06369522 | 0.10069 | 0.291258378 | 1.532379 | 0.000277 | hypermethylated |
| cg00960395 | 0.10941 | 0.316421622 | 1.532104 | 8.04E-06 | hypermethylated |
| cg25037595 | 0.07876 | 0.227771351 | 1.532051 | 1.18E-06 | hypermethylated |
| cg22851295 | 0.10265 | 0.296826486 | 1.531886 | 1.12E-05 | hypermethylated |
| cg01527159 | 0.11443 | 0.330801622 | 1.531501 | 8.60E-06 | hypermethylated |
| cg06905692 | 0.10387 | 0.300240541 | 1.53134  | 0.001141 | hypermethylated |
| cg18252309 | 0.13126 | 0.379386486 | 1.531241 | 9.82E-06 | hypermethylated |
| cg14482308 | 0.12514 | 0.361525405 | 1.530554 | 0.000234 | hypermethylated |
| cg00745725 | 0.13139 | 0.379558378 | 1.530466 | 1.66E-05 | hypermethylated |
| cg26163578 | 0.15408 | 0.445071351 | 1.530357 | 8.37E-06 | hypermethylated |
| cg22897615 | 0.19017 | 0.5493      | 1.530305 | 6.39E-06 | hypermethylated |
| cg23018092 | 0.09138 | 0.263871892 | 1.529887 | 0.000501 | hypermethylated |
| cg26751356 | 0.14027 | 0.405004324 | 1.529731 | 8.15E-06 | hypermethylated |
| cg22203547 | 0.09386 | 0.270970811 | 1.529555 | 2.64E-05 | hypermethylated |
| cg25617340 | 0.08694 | 0.250987568 | 1.529524 | 8.48E-06 | hypermethylated |
| cg23263937 | 0.17281 | 0.498727568 | 1.529065 | 9.31E-06 | hypermethylated |
| cg02547394 | 0.15701 | 0.452991351 | 1.528627 | 2.57E-06 | hypermethylated |
| cg04123385 | 0.08535 | 0.246231892 | 1.528555 | 6.31E-05 | hypermethylated |
| cg03924566 | 0.09479 | 0.273464324 | 1.528546 | 6.70E-05 | hypermethylated |
| cg11747183 | 0.11723 | 0.338184324 | 1.528468 | 5.72E-05 | hypermethylated |
| cg20698924 | 0.12102 | 0.349095135 | 1.528375 | 3.95E-05 | hypermethylated |
| cg06594404 | 0.1385  | 0.399512973 | 1.528356 | 1.62E-05 | hypermethylated |
| cg01130127 | 0.13119 | 0.378392432 | 1.528225 | 2.48E-05 | hypermethylated |
| cg16731240 | 0.13448 | 0.387868108 | 1.528175 | 0.000152 | hypermethylated |
| cg03356595 | 0.16242 | 0.468424865 | 1.528088 | 1.21E-05 | hypermethylated |
| cg11668923 | 0.12491 | 0.360243784 | 1.528085 | 1.99E-05 | hypermethylated |
| cg26620530 | 0.11808 | 0.340541081 | 1.528064 | 0.000159 | hypermethylated |
| cg00319545 | 0.07772 | 0.224141081 | 1.528049 | 3.23E-05 | hypermethylated |
| cg23421023 | 0.10576 | 0.305000541 | 1.528018 | 5.86E-05 | hypermethylated |
| cg25249539 | 0.09607 | 0.277028649 | 1.527877 | 2.27E-05 | hypermethylated |
| cg01047586 | 0.16897 | 0.487203784 | 1.527758 | 3.67E-05 | hypermethylated |
| cg22518208 | 0.08261 | 0.238195135 | 1.527756 | 2.10E-05 | hypermethylated |
| cg15133351 | 0.14055 | 0.405204865 | 1.527568 | 3.00E-05 | hypermethylated |
| cg01794426 | 0.10629 | 0.306383243 | 1.527332 | 1.18E-05 | hypermethylated |
| cg05050657 | 0.13886 | 0.400248649 | 1.527265 | 5.58E-06 | hypermethylated |
| cg12921750 | 0.09263 | 0.266994595 | 1.527259 | 2.64E-05 | hypermethylated |
| cg01614102 | 0.17198 | 0.49570973  | 1.527255 | 2.49E-06 | hypermethylated |
| cg00945238 | 0.08261 | 0.238108108 | 1.527228 | 1.58E-05 | hypermethylated |
| cg01611862 | 0.07753 | 0.22344973  | 1.527124 | 1.75E-05 | hypermethylated |
| cg05442408 | 0.0954  | 0.274942162 | 1.527067 | 1.73E-05 | hypermethylated |
| cg25590492 | 0.0853  | 0.245807568 | 1.526912 | 3.15E-05 | hypermethylated |
| cg08875948 | 0.11264 | 0.324586486 | 1.526884 | 4.36E-05 | hypermethylated |
| cg02421985 | 0.13519 | 0.389557297 | 1.526847 | 8.60E-06 | hypermethylated |
| cg04495336 | 0.085   | 0.244889189 | 1.526594 | 0.000123 | hypermethylated |
| cg24298311 | 0.10299 | 0.296715676 | 1.526577 | 0.000104 | hypermethylated |
| cg00824767 | 0.12832 | 0.369565405 | 1.526084 | 1.71E-05 | hypermethylated |
| cg02157467 | 0.09047 | 0.260492432 | 1.52573  | 1.75E-05 | hypermethylated |
| cg14642432 | 0.13784 | 0.396810811 | 1.525457 | 1.05E-05 | hypermethylated |
| cg13891181 | 0.07345 | 0.211443784 | 1.52544  | 4.47E-05 | hypermethylated |
| cg27319123 | 0.13627 | 0.392225946 | 1.525217 | 0.000109 | hypermethylated |
| cg23266743 | 0.10991 | 0.316285946 | 1.524907 | 1.58E-05 | hypermethylated |
| cg16606320 | 0.16834 | 0.484427027 | 1.524901 | 8.83E-06 | hypermethylated |
| cg23760687 | 0.13439 | 0.386552432 | 1.524238 | 1.06E-05 | hypermethylated |
| cg12568898 | 0.11441 | 0.32902973  | 1.524005 | 4.60E-06 | hypermethylated |
| cg18135771 | 0.09753 | 0.28044     | 1.523774 | 1.60E-05 | hypermethylated |
| cg15834072 | 0.16425 | 0.472112432 | 1.523237 | 2.71E-06 | hypermethylated |
| cg13706544 | 0.09224 | 0.265074054 | 1.522931 | 5.45E-05 | hypermethylated |



|            |         |             |          |          |                 |
|------------|---------|-------------|----------|----------|-----------------|
| cg27546237 | 0.10462 | 0.300554595 | 1.522468 | 7.84E-05 | hypermethylated |
| cg21230745 | 0.12623 | 0.362627568 | 1.522434 | 1.25E-05 | hypermethylated |
| cg14714046 | 0.11689 | 0.335696757 | 1.522007 | 1.67E-06 | hypermethylated |
| cg05085500 | 0.13067 | 0.375230811 | 1.52185  | 1.99E-05 | hypermethylated |
| cg11500467 | 0.10425 | 0.299344324 | 1.521759 | 3.76E-05 | hypermethylated |
| cg16599703 | 0.13494 | 0.387467568 | 1.521757 | 4.24E-06 | hypermethylated |
| cg16758813 | 0.09613 | 0.275984865 | 1.521531 | 1.94E-05 | hypermethylated |
| cg01728554 | 0.08945 | 0.256792973 | 1.521452 | 1.35E-05 | hypermethylated |
| cg03262554 | 0.14942 | 0.428765405 | 1.520815 | 1.85E-06 | hypermethylated |
| cg02062480 | 0.11582 | 0.332324865 | 1.52071  | 3.11E-05 | hypermethylated |
| cg06749715 | 0.11193 | 0.320994595 | 1.519952 | 2.92E-05 | hypermethylated |
| cg20266154 | 0.11492 | 0.329457297 | 1.519462 | 9.60E-05 | hypermethylated |
| cg16280141 | 0.10243 | 0.293601081 | 1.519219 | 1.12E-05 | hypermethylated |
| cg10414975 | 0.11252 | 0.322500541 | 1.51912  | 3.96E-06 | hypermethylated |
| cg18022662 | 0.08234 | 0.235978919 | 1.518993 | 6.75E-06 | hypermethylated |
| cg02765859 | 0.09086 | 0.26036     | 1.518791 | 5.06E-05 | hypermethylated |
| cg14780416 | 0.09411 | 0.269658378 | 1.518713 | 0.000741 | hypermethylated |
| cg21802055 | 0.16744 | 0.479715135 | 1.518534 | 5.43E-06 | hypermethylated |
| cg15604467 | 0.08831 | 0.252984324 | 1.518399 | 0.000123 | hypermethylated |
| cg08445802 | 0.15971 | 0.457518378 | 1.518375 | 4.36E-06 | hypermethylated |
| cg13866527 | 0.12703 | 0.363842703 | 1.518146 | 8.63E-05 | hypermethylated |
| cg17078116 | 0.15368 | 0.440123243 | 1.517978 | 5.73E-06 | hypermethylated |
| cg17871749 | 0.09319 | 0.266856757 | 1.517818 | 1.21E-05 | hypermethylated |
| cg24736989 | 0.12379 | 0.354353514 | 1.517295 | 4.48E-06 | hypermethylated |
| cg23556443 | 0.11048 | 0.316229189 | 1.517185 | 2.71E-05 | hypermethylated |
| cg25372296 | 0.1434  | 0.410407027 | 1.51701  | 5.00E-06 | hypermethylated |
| cg10239098 | 0.12136 | 0.347319459 | 1.51697  | 6.46E-05 | hypermethylated |
| cg01994205 | 0.11064 | 0.316638378 | 1.516963 | 0.000202 | hypermethylated |
| cg00806490 | 0.10873 | 0.311117838 | 1.516711 | 6.57E-06 | hypermethylated |
| cg25201511 | 0.10666 | 0.304983784 | 1.515713 | 8.98E-07 | hypermethylated |
| cg08087868 | 0.15431 | 0.441227568 | 1.515691 | 3.21E-06 | hypermethylated |
| cg07095230 | 0.15205 | 0.434684865 | 1.515424 | 3.15E-05 | hypermethylated |
| cg25922637 | 0.07619 | 0.217814054 | 1.515423 | 1.99E-05 | hypermethylated |
| cg01185626 | 0.10372 | 0.296504324 | 1.515359 | 8.83E-06 | hypermethylated |
| cg21063758 | 0.08548 | 0.244358919 | 1.515343 | 0.000129 | hypermethylated |
| cg27313642 | 0.11374 | 0.325111351 | 1.515194 | 1.15E-05 | hypermethylated |
| cg08453036 | 0.0924  | 0.264107027 | 1.515158 | 8.15E-06 | hypermethylated |
| cg19547319 | 0.12894 | 0.368525946 | 1.515066 | 1.25E-05 | hypermethylated |
| cg17537177 | 0.11196 | 0.319915135 | 1.514706 | 0.000102 | hypermethylated |
| cg04168853 | 0.13831 | 0.395183243 | 1.514616 | 5.73E-06 | hypermethylated |
| cg07030506 | 0.07431 | 0.212314595 | 1.514575 | 6.66E-06 | hypermethylated |
| cg17029354 | 0.12122 | 0.346167568 | 1.513843 | 2.71E-05 | hypermethylated |
| cg08662665 | 0.07733 | 0.220793514 | 1.513598 | 4.54E-06 | hypermethylated |
| cg20631104 | 0.11568 | 0.330276216 | 1.513534 | 6.15E-05 | hypermethylated |
| cg17101296 | 0.14102 | 0.402558919 | 1.5133   | 0.000214 | hypermethylated |
| cg03843972 | 0.10415 | 0.297272432 | 1.513123 | 3.40E-05 | hypermethylated |
| cg13338350 | 0.07802 | 0.222671892 | 1.513004 | 3.95E-05 | hypermethylated |
| cg09323727 | 0.15309 | 0.436825946 | 1.512679 | 0.00024  | hypermethylated |
| cg10217445 | 0.1029  | 0.293571892 | 1.512471 | 8.37E-06 | hypermethylated |
| cg23938300 | 0.08724 | 0.248850811 | 1.512219 | 9.83E-05 | hypermethylated |
| cg01396387 | 0.10083 | 0.287548108 | 1.511878 | 4.26E-05 | hypermethylated |
| cg07549278 | 0.10231 | 0.291724324 | 1.511659 | 9.83E-05 | hypermethylated |
| cg27403265 | 0.10379 | 0.295824865 | 1.511076 | 2.67E-05 | hypermethylated |
| cg16142306 | 0.12809 | 0.365042703 | 1.510907 | 4.70E-05 | hypermethylated |
| cg17542408 | 0.16958 | 0.48296973  | 1.509967 | 1.82E-05 | hypermethylated |
| cg18877285 | 0.10408 | 0.296353514 | 1.509626 | 1.12E-05 | hypermethylated |
| cg06883126 | 0.1447  | 0.412009189 | 1.509612 | 2.49E-06 | hypermethylated |
| cg13434411 | 0.13239 | 0.376894054 | 1.509365 | 9.96E-06 | hypermethylated |

|            |         |             |          |          |                 |
|------------|---------|-------------|----------|----------|-----------------|
| cg03245632 | 0.08675 | 0.24692     | 1.509108 | 2.57E-05 | hypermethylated |
| cg14231297 | 0.14584 | 0.415040541 | 1.508866 | 1.28E-05 | hypermethylated |
| cg04178787 | 0.15993 | 0.455036216 | 1.508541 | 3.15E-05 | hypermethylated |
| cg09549813 | 0.11023 | 0.313621081 | 1.508506 | 0.000219 | hypermethylated |
| cg21553182 | 0.0973  | 0.276815676 | 1.508414 | 1.84E-05 | hypermethylated |
| cg13000912 | 0.09538 | 0.271291351 | 1.508084 | 0.000112 | hypermethylated |
| cg06581175 | 0.13689 | 0.389195676 | 1.507479 | 4.93E-06 | hypermethylated |
| cg05227131 | 0.11582 | 0.329268108 | 1.507378 | 6.95E-05 | hypermethylated |
| cg02279719 | 0.10528 | 0.29900973  | 1.505961 | 9.95E-05 | hypermethylated |
| cg26351229 | 0.12535 | 0.356001081 | 1.50592  | 1.05E-05 | hypermethylated |
| cg11552072 | 0.14    | 0.39751027  | 1.505565 | 2.45E-05 | hypermethylated |
| cg08361126 | 0.12951 | 0.367702703 | 1.505476 | 1.12E-05 | hypermethylated |
| cg15877129 | 0.09476 | 0.269010811 | 1.505314 | 7.12E-05 | hypermethylated |
| cg03576469 | 0.134   | 0.380378919 | 1.505204 | 6.54E-05 | hypermethylated |
| cg22131234 | 0.09153 | 0.259791351 | 1.505037 | 0.000129 | hypermethylated |
| cg26157385 | 0.13448 | 0.381668108 | 1.504927 | 1.58E-06 | hypermethylated |
| cg14884793 | 0.08334 | 0.236503243 | 1.504779 | 0.000174 | hypermethylated |
| cg09562322 | 0.11024 | 0.312823243 | 1.5047   | 7.65E-05 | hypermethylated |
| cg23820885 | 0.08365 | 0.237366486 | 1.504679 | 1.06E-05 | hypermethylated |
| cg18699744 | 0.11624 | 0.329713514 | 1.504106 | 0.000234 | hypermethylated |
| cg21701379 | 0.12388 | 0.351375135 | 1.504069 | 2.27E-05 | hypermethylated |
| cg11296759 | 0.11863 | 0.336418378 | 1.503788 | 1.33E-06 | hypermethylated |
| cg10542584 | 0.08003 | 0.226937838 | 1.503684 | 2.32E-06 | hypermethylated |
| cg03215105 | 0.10585 | 0.300050811 | 1.503186 | 5.86E-05 | hypermethylated |
| cg01715455 | 0.09726 | 0.275676216 | 1.503056 | 0.00062  | hypermethylated |
| cg26608174 | 0.12082 | 0.342388108 | 1.502773 | 1.46E-05 | hypermethylated |
| cg03237606 | 0.10544 | 0.298775135 | 1.502638 | 1.89E-05 | hypermethylated |
| cg07060551 | 0.13723 | 0.388817297 | 1.502496 | 9.31E-06 | hypermethylated |
| cg23288973 | 0.11926 | 0.337870811 | 1.502361 | 3.40E-05 | hypermethylated |
| cg01002529 | 0.12435 | 0.352278378 | 1.502309 | 5.00E-05 | hypermethylated |
| cg00460235 | 0.09068 | 0.256890811 | 1.502299 | 2.10E-05 | hypermethylated |
| cg11686427 | 0.15857 | 0.448914595 | 1.501321 | 8.15E-06 | hypermethylated |
| cg04641171 | 0.11453 | 0.323920541 | 1.499914 | 5.00E-06 | hypermethylated |
| cg06057566 | 0.09289 | 0.262696757 | 1.499803 | 5.00E-05 | hypermethylated |
| cg03234186 | 0.13289 | 0.375699459 | 1.499346 | 6.31E-05 | hypermethylated |
| cg23490887 | 0.09637 | 0.272441081 | 1.499288 | 3.07E-05 | hypermethylated |
| cg05718036 | 0.10149 | 0.286911351 | 1.499267 | 0.00035  | hypermethylated |
| cg17603132 | 0.10186 | 0.287937838 | 1.49917  | 1.21E-05 | hypermethylated |
| cg23424003 | 0.14884 | 0.420644865 | 1.49884  | 0.000112 | hypermethylated |
| cg04469880 | 0.09333 | 0.263762162 | 1.498825 | 1.23E-05 | hypermethylated |
| cg07777790 | 0.13391 | 0.37826973  | 1.498152 | 2.57E-06 | hypermethylated |
| cg17677030 | 0.13119 | 0.370583784 | 1.498142 | 1.42E-05 | hypermethylated |
| cg05214685 | 0.13169 | 0.371967027 | 1.498029 | 4.24E-06 | hypermethylated |
| cg02106850 | 0.10333 | 0.291763243 | 1.497539 | 0.000287 | hypermethylated |
| cg15930596 | 0.09927 | 0.28026973  | 1.497386 | 2.51E-05 | hypermethylated |
| cg20027133 | 0.11554 | 0.326178378 | 1.497269 | 6.31E-05 | hypermethylated |
| cg18956933 | 0.15652 | 0.441763243 | 1.496926 | 4.01E-06 | hypermethylated |
| cg02452944 | 0.15558 | 0.439053514 | 1.49674  | 1.04E-05 | hypermethylated |
| cg09884341 | 0.12571 | 0.354748649 | 1.496698 | 9.82E-06 | hypermethylated |
| cg12600018 | 0.08052 | 0.227203243 | 1.496564 | 0.000112 | hypermethylated |
| cg14179581 | 0.10548 | 0.297614595 | 1.496476 | 4.42E-05 | hypermethylated |
| cg11323198 | 0.1295  | 0.365367568 | 1.496396 | 1.01E-05 | hypermethylated |
| cg10384245 | 0.14172 | 0.399772973 | 1.496138 | 2.71E-06 | hypermethylated |
| cg08780398 | 0.0849  | 0.239436216 | 1.495805 | 4.88E-05 | hypermethylated |
| cg11751806 | 0.09501 | 0.267945405 | 1.495788 | 2.71E-05 | hypermethylated |
| cg09674215 | 0.11249 | 0.317237297 | 1.495766 | 4.86E-06 | hypermethylated |
| cg14882700 | 0.1361  | 0.383775135 | 1.495594 | 6.95E-05 | hypermethylated |
| cg22697574 | 0.11113 | 0.313291351 | 1.495257 | 0.000126 | hypermethylated |

|            |         |             |          |          |                 |
|------------|---------|-------------|----------|----------|-----------------|
| cg18201679 | 0.11466 | 0.323104324 | 1.494638 | 1.75E-05 | hypermethylated |
| cg15949044 | 0.12447 | 0.350621622 | 1.494117 | 1.42E-05 | hypermethylated |
| cg25645064 | 0.12653 | 0.356365405 | 1.493878 | 3.32E-05 | hypermethylated |
| cg14414464 | 0.12274 | 0.345547027 | 1.493277 | 5.43E-06 | hypermethylated |
| cg00840332 | 0.1527  | 0.429875676 | 1.493219 | 4.94E-05 | hypermethylated |
| cg11502555 | 0.12974 | 0.365177297 | 1.492974 | 3.07E-05 | hypermethylated |
| cg25953239 | 0.1559  | 0.438808649 | 1.492971 | 2.51E-05 | hypermethylated |
| cg12980692 | 0.09077 | 0.255487568 | 1.492966 | 3.00E-05 | hypermethylated |
| cg24954895 | 0.15573 | 0.43826973  | 1.492772 | 1.37E-06 | hypermethylated |
| cg16254309 | 0.12094 | 0.340306486 | 1.492543 | 9.95E-05 | hypermethylated |
| cg01410472 | 0.09015 | 0.253603243 | 1.492174 | 7.38E-05 | hypermethylated |
| cg09382127 | 0.14381 | 0.404547568 | 1.492145 | 2.57E-06 | hypermethylated |
| cg11716272 | 0.11285 | 0.317454595 | 1.492144 | 1.18E-05 | hypermethylated |
| cg05137466 | 0.07509 | 0.211221081 | 1.492061 | 0.000104 | hypermethylated |
| cg05121480 | 0.11059 | 0.311073514 | 1.492035 | 3.07E-05 | hypermethylated |
| cg17078686 | 0.14112 | 0.396914595 | 1.491906 | 1.66E-05 | hypermethylated |
| cg09423283 | 0.10037 | 0.282177838 | 1.491277 | 6.75E-06 | hypermethylated |
| cg21319932 | 0.09886 | 0.2779      | 1.491107 | 8.42E-05 | hypermethylated |
| cg03834286 | 0.10788 | 0.303196216 | 1.490824 | 2.16E-06 | hypermethylated |
| cg02391713 | 0.22735 | 0.638500541 | 1.489773 | 5.00E-06 | hypermethylated |
| cg09042277 | 0.12953 | 0.363769189 | 1.489737 | 1.01E-05 | hypermethylated |
| cg03755123 | 0.10029 | 0.281639459 | 1.489672 | 9.57E-06 | hypermethylated |
| cg15333426 | 0.09773 | 0.274444865 | 1.489643 | 8.04E-06 | hypermethylated |
| cg14186066 | 0.11867 | 0.333228108 | 1.489555 | 9.07E-06 | hypermethylated |
| cg05658487 | 0.1238  | 0.347539459 | 1.489165 | 3.39E-06 | hypermethylated |
| cg15795787 | 0.09608 | 0.269666486 | 1.488868 | 2.39E-05 | hypermethylated |
| cg04931256 | 0.11868 | 0.333003243 | 1.488459 | 2.07E-05 | hypermethylated |
| cg07035961 | 0.16583 | 0.465275135 | 1.488379 | 1.63E-06 | hypermethylated |
| cg21000072 | 0.10512 | 0.294889189 | 1.488136 | 7.03E-06 | hypermethylated |
| cg16884902 | 0.1085  | 0.304320541 | 1.487897 | 6.78E-05 | hypermethylated |
| cg11870560 | 0.10903 | 0.305801081 | 1.487868 | 4.36E-05 | hypermethylated |
| cg16733705 | 0.12506 | 0.35075027  | 1.487824 | 2.51E-05 | hypermethylated |
| cg09972259 | 0.1049  | 0.294123243 | 1.487406 | 9.96E-06 | hypermethylated |
| cg25636665 | 0.12902 | 0.361747027 | 1.487386 | 2.78E-05 | hypermethylated |
| cg23130254 | 0.10939 | 0.306649189 | 1.487108 | 7.72E-06 | hypermethylated |
| cg16355785 | 0.12079 | 0.338554595 | 1.486887 | 7.12E-05 | hypermethylated |
| cg19968840 | 0.15207 | 0.426170811 | 1.486696 | 1.66E-05 | hypermethylated |
| cg22746058 | 0.12373 | 0.346731892 | 1.486625 | 4.15E-05 | hypermethylated |
| cg12597389 | 0.14042 | 0.39345027  | 1.486433 | 3.90E-06 | hypermethylated |
| cg10084644 | 0.14863 | 0.416450811 | 1.486421 | 1.80E-05 | hypermethylated |
| cg08146323 | 0.16824 | 0.471373514 | 1.48635  | 3.54E-06 | hypermethylated |
| cg01370541 | 0.09725 | 0.272417297 | 1.486048 | 2.92E-05 | hypermethylated |
| cg03816707 | 0.17624 | 0.493663784 | 1.485987 | 1.41E-06 | hypermethylated |
| cg15325658 | 0.08335 | 0.233469189 | 1.485978 | 2.51E-05 | hypermethylated |
| cg00239870 | 0.09703 | 0.271776216 | 1.485916 | 0.002432 | hypermethylated |
| cg11229862 | 0.11457 | 0.320883784 | 1.485822 | 9.95E-05 | hypermethylated |
| cg25247290 | 0.20622 | 0.577552432 | 1.485768 | 1.39E-05 | hypermethylated |
| cg20099830 | 0.14017 | 0.392537838 | 1.485654 | 5.89E-06 | hypermethylated |
| cg18582824 | 0.12868 | 0.360338378 | 1.485564 | 1.06E-05 | hypermethylated |
| cg00777627 | 0.09777 | 0.273723784 | 1.485257 | 0.000733 | hypermethylated |
| cg02049629 | 0.10668 | 0.29858973  | 1.484875 | 2.10E-05 | hypermethylated |
| cg03733219 | 0.12687 | 0.355072973 | 1.484765 | 3.85E-05 | hypermethylated |
| cg00378730 | 0.09671 | 0.270648108 | 1.484681 | 8.63E-05 | hypermethylated |
| cg01405404 | 0.13797 | 0.386075676 | 1.484529 | 2.39E-05 | hypermethylated |
| cg27211284 | 0.13755 | 0.384832432 | 1.484274 | 9.82E-06 | hypermethylated |
| cg03700462 | 0.08085 | 0.226174595 | 1.484117 | 0.000219 | hypermethylated |
| cg06674731 | 0.12599 | 0.352380541 | 1.483825 | 0.000155 | hypermethylated |
| cg15594205 | 0.14309 | 0.400188649 | 1.483757 | 4.26E-05 | hypermethylated |

|            |         |             |          |          |                 |
|------------|---------|-------------|----------|----------|-----------------|
| cg08426444 | 0.10594 | 0.296281622 | 1.483722 | 9.16E-05 | hypermethylated |
| cg17156743 | 0.08689 | 0.243001622 | 1.483704 | 2.71E-05 | hypermethylated |
| cg13906811 | 0.14232 | 0.397921081 | 1.483344 | 5.00E-06 | hypermethylated |
| cg22070991 | 0.14622 | 0.408797297 | 1.483245 | 2.45E-05 | hypermethylated |
| cg25559313 | 0.10981 | 0.306837297 | 1.482464 | 2.96E-05 | hypermethylated |
| cg00854817 | 0.10019 | 0.27995027  | 1.482432 | 5.97E-06 | hypermethylated |
| cg18862481 | 0.17144 | 0.478862703 | 1.481908 | 6.22E-06 | hypermethylated |
| cg16498913 | 0.12634 | 0.352882703 | 1.481877 | 4.94E-05 | hypermethylated |
| cg03769383 | 0.12217 | 0.341159459 | 1.481556 | 2.45E-05 | hypermethylated |
| cg15965134 | 0.10854 | 0.30309027  | 1.481521 | 1.50E-05 | hypermethylated |
| cg24534135 | 0.09413 | 0.262754054 | 1.480987 | 4.70E-05 | hypermethylated |
| cg00452257 | 0.12268 | 0.342437838 | 1.480942 | 0.000166 | hypermethylated |
| cg09578028 | 0.17352 | 0.484133514 | 1.480303 | 6.66E-06 | hypermethylated |
| cg24496475 | 0.18307 | 0.51075027  | 1.480223 | 3.90E-06 | hypermethylated |
| cg02841000 | 0.1482  | 0.413068108 | 1.478834 | 9.57E-06 | hypermethylated |
| cg00282510 | 0.12759 | 0.355537838 | 1.478488 | 4.53E-05 | hypermethylated |
| cg08278741 | 0.11004 | 0.306616216 | 1.478406 | 7.65E-05 | hypermethylated |
| cg14223293 | 0.1267  | 0.353029189 | 1.478371 | 2.23E-06 | hypermethylated |
| cg15520279 | 0.14862 | 0.414077838 | 1.478274 | 4.80E-06 | hypermethylated |
| cg18844382 | 0.12381 | 0.34491027  | 1.478093 | 0.000805 | hypermethylated |
| cg09904497 | 0.08128 | 0.226425946 | 1.478067 | 5.97E-06 | hypermethylated |
| cg25205699 | 0.10526 | 0.293208108 | 1.477968 | 3.90E-05 | hypermethylated |
| cg21751684 | 0.12649 | 0.352333514 | 1.477918 | 1.75E-05 | hypermethylated |
| cg06066137 | 0.0983  | 0.273783784 | 1.477774 | 6.66E-06 | hypermethylated |
| cg08280383 | 0.11123 | 0.309793514 | 1.477761 | 1.75E-05 | hypermethylated |
| cg13906669 | 0.09198 | 0.256165946 | 1.477687 | 6.46E-05 | hypermethylated |
| cg12233363 | 0.12272 | 0.341735135 | 1.477508 | 1.06E-05 | hypermethylated |
| cg10966580 | 0.15811 | 0.440236216 | 1.477349 | 8.37E-06 | hypermethylated |
| cg17971015 | 0.12563 | 0.34979027  | 1.477309 | 0.000207 | hypermethylated |
| cg06721255 | 0.10134 | 0.282122162 | 1.477116 | 4.76E-05 | hypermethylated |
| cg22304612 | 0.13217 | 0.367913514 | 1.476972 | 4.20E-05 | hypermethylated |
| cg11788523 | 0.11242 | 0.312915676 | 1.476875 | 8.37E-06 | hypermethylated |
| cg06243400 | 0.10407 | 0.289555135 | 1.476284 | 1.99E-05 | hypermethylated |
| cg18090004 | 0.11725 | 0.326157297 | 1.47598  | 0.000124 | hypermethylated |
| cg06713632 | 0.09803 | 0.272617297 | 1.475582 | 0.000454 | hypermethylated |
| cg09521703 | 0.15122 | 0.420524324 | 1.47554  | 9.96E-06 | hypermethylated |
| cg24005685 | 0.14539 | 0.404221081 | 1.475217 | 9.07E-06 | hypermethylated |
| cg12550866 | 0.09078 | 0.252385946 | 1.475185 | 3.32E-05 | hypermethylated |
| cg20000718 | 0.09408 | 0.261422703 | 1.474424 | 7.03E-05 | hypermethylated |
| cg19267252 | 0.1537  | 0.427087568 | 1.474415 | 9.82E-06 | hypermethylated |
| cg22864077 | 0.14006 | 0.389178919 | 1.474389 | 7.93E-06 | hypermethylated |
| cg10908460 | 0.1046  | 0.290639459 | 1.474348 | 0.000354 | hypermethylated |
| cg09960109 | 0.10105 | 0.280770811 | 1.474324 | 6.30E-06 | hypermethylated |
| cg11950383 | 0.12397 | 0.344398378 | 1.474087 | 2.81E-05 | hypermethylated |
| cg13720108 | 0.10076 | 0.279900541 | 1.473991 | 4.15E-05 | hypermethylated |
| cg22278296 | 0.1031  | 0.286395676 | 1.473965 | 0.000588 | hypermethylated |
| cg19672997 | 0.14725 | 0.409013514 | 1.473881 | 3.49E-06 | hypermethylated |
| cg24620761 | 0.12891 | 0.358041622 | 1.473763 | 1.89E-05 | hypermethylated |
| cg20332645 | 0.1317  | 0.365757838 | 1.473633 | 5.43E-06 | hypermethylated |
| cg25784308 | 0.10171 | 0.282456216 | 1.473566 | 0.000117 | hypermethylated |
| cg02455820 | 0.15789 | 0.438245946 | 1.472821 | 1.01E-05 | hypermethylated |
| cg23689712 | 0.10735 | 0.297921622 | 1.472611 | 5.72E-05 | hypermethylated |
| cg11784623 | 0.08642 | 0.23981027  | 1.472456 | 6.54E-05 | hypermethylated |
| cg05588496 | 0.09165 | 0.254322703 | 1.472453 | 3.15E-05 | hypermethylated |
| cg20044410 | 0.13438 | 0.372860541 | 1.472318 | 7.32E-06 | hypermethylated |
| cg19585597 | 0.11032 | 0.305984865 | 1.471766 | 2.64E-05 | hypermethylated |
| cg02111032 | 0.15181 | 0.421054054 | 1.471739 | 6.75E-06 | hypermethylated |
| cg16803520 | 0.12139 | 0.336644865 | 1.471578 | 3.49E-05 | hypermethylated |

|            |         |             |          |          |                 |
|------------|---------|-------------|----------|----------|-----------------|
| cg09792204 | 0.12779 | 0.35436973  | 1.47148  | 0.000172 | hypermethylated |
| cg05667379 | 0.12762 | 0.353894595 | 1.471465 | 1.99E-05 | hypermethylated |
| cg08152546 | 0.15543 | 0.430998378 | 1.471417 | 3.49E-06 | hypermethylated |
| cg22206608 | 0.12646 | 0.350631351 | 1.471274 | 8.37E-06 | hypermethylated |
| cg14056110 | 0.11958 | 0.331476757 | 1.470932 | 3.57E-05 | hypermethylated |
| cg24721899 | 0.1545  | 0.428267027 | 1.470904 | 1.42E-05 | hypermethylated |
| cg27365825 | 0.12429 | 0.344456216 | 1.47061  | 5.86E-05 | hypermethylated |
| cg25809841 | 0.11458 | 0.317532973 | 1.470551 | 3.27E-05 | hypermethylated |
| cg07138551 | 0.09714 | 0.269138919 | 1.470214 | 1.75E-05 | hypermethylated |
| cg12118269 | 0.11698 | 0.324064865 | 1.470021 | 0.000358 | hypermethylated |
| cg22271921 | 0.09759 | 0.270349189 | 1.470019 | 7.12E-05 | hypermethylated |
| cg25681339 | 0.13381 | 0.370564865 | 1.46954  | 3.85E-05 | hypermethylated |
| cg07647164 | 0.11625 | 0.321923784 | 1.469488 | 5.12E-05 | hypermethylated |
| cg16845394 | 0.14074 | 0.389683784 | 1.469271 | 6.15E-05 | hypermethylated |
| cg14095438 | 0.11682 | 0.323328649 | 1.468714 | 8.63E-05 | hypermethylated |
| cg14074285 | 0.10354 | 0.286487568 | 1.468284 | 7.38E-05 | hypermethylated |
| cg01883425 | 0.12478 | 0.345175676 | 1.467944 | 1.01E-05 | hypermethylated |
| cg06984025 | 0.09556 | 0.264330811 | 1.467866 | 3.12E-06 | hypermethylated |
| cg09554951 | 0.16322 | 0.451485946 | 1.467863 | 6.22E-06 | hypermethylated |
| cg04150055 | 0.11256 | 0.31134973  | 1.467842 | 0.000209 | hypermethylated |
| cg14614811 | 0.10681 | 0.295398919 | 1.467618 | 2.75E-06 | hypermethylated |
| cg05470523 | 0.10849 | 0.299942703 | 1.467125 | 1.84E-05 | hypermethylated |
| cg17328472 | 0.09482 | 0.26212973  | 1.467018 | 5.51E-05 | hypermethylated |
| cg05788437 | 0.05766 | 0.159388108 | 1.466901 | 5.06E-05 | hypermethylated |
| cg05052450 | 0.11763 | 0.325098919 | 1.466623 | 6.95E-05 | hypermethylated |
| cg22344727 | 0.11727 | 0.324086486 | 1.466545 | 4.01E-06 | hypermethylated |
| cg23262036 | 0.14672 | 0.405462162 | 1.466502 | 2.39E-05 | hypermethylated |
| cg21158087 | 0.14958 | 0.413341622 | 1.466417 | 3.59E-06 | hypermethylated |
| cg24874180 | 0.12416 | 0.342968108 | 1.465874 | 2.15E-05 | hypermethylated |
| cg16206813 | 0.16083 | 0.444244865 | 1.465819 | 4.12E-06 | hypermethylated |
| cg01189783 | 0.08545 | 0.236022703 | 1.465773 | 3.95E-05 | hypermethylated |
| cg26620710 | 0.09827 | 0.271378378 | 1.465483 | 1.25E-05 | hypermethylated |
| cg03794801 | 0.10603 | 0.292774595 | 1.465318 | 6.46E-05 | hypermethylated |
| cg24583624 | 0.11333 | 0.312885946 | 1.465107 | 3.07E-05 | hypermethylated |
| cg03209854 | 0.13234 | 0.365349189 | 1.465027 | 7.52E-06 | hypermethylated |
| cg09322259 | 0.12626 | 0.348556757 | 1.464996 | 7.29E-05 | hypermethylated |
| cg21647227 | 0.13664 | 0.377177838 | 1.464865 | 3.35E-06 | hypermethylated |
| cg00339488 | 0.11486 | 0.317038919 | 1.464783 | 1.71E-05 | hypermethylated |
| cg08291024 | 0.11771 | 0.324889189 | 1.464711 | 1.58E-05 | hypermethylated |
| cg08977390 | 0.13036 | 0.359751351 | 1.464499 | 1.63E-06 | hypermethylated |
| cg03464573 | 0.102   | 0.281486486 | 1.464497 | 8.71E-06 | hypermethylated |
| cg05422683 | 0.09481 | 0.261553514 | 1.463995 | 5.93E-05 | hypermethylated |
| cg04140663 | 0.1557  | 0.429495135 | 1.463873 | 1.89E-05 | hypermethylated |
| cg07595776 | 0.13681 | 0.377327027 | 1.463642 | 8.15E-06 | hypermethylated |
| cg23189410 | 0.19533 | 0.538682703 | 1.463522 | 5.73E-06 | hypermethylated |
| cg21726372 | 0.13481 | 0.371723243 | 1.463301 | 5.72E-05 | hypermethylated |
| cg10049708 | 0.10967 | 0.302368108 | 1.463137 | 4.86E-06 | hypermethylated |
| cg04079301 | 0.11748 | 0.323846486 | 1.462895 | 7.93E-06 | hypermethylated |
| cg27638727 | 0.1459  | 0.402176216 | 1.462848 | 5.00E-06 | hypermethylated |
| cg03985727 | 0.17089 | 0.471031892 | 1.462757 | 2.10E-05 | hypermethylated |
| cg19925849 | 0.1342  | 0.369868649 | 1.462628 | 1.58E-05 | hypermethylated |
| cg15446990 | 0.08685 | 0.239332973 | 1.462421 | 1.17E-05 | hypermethylated |
| cg27147819 | 0.0748  | 0.206114054 | 1.462333 | 0.000112 | hypermethylated |
| cg06544111 | 0.16955 | 0.467142162 | 1.462151 | 2.27E-05 | hypermethylated |
| cg20401252 | 0.10736 | 0.295755676 | 1.461949 | 9.82E-06 | hypermethylated |
| cg10379890 | 0.10951 | 0.301556216 | 1.461364 | 9.27E-05 | hypermethylated |
| cg14009098 | 0.11148 | 0.30696     | 1.461266 | 5.25E-05 | hypermethylated |
| cg09393254 | 0.11044 | 0.304067027 | 1.461127 | 3.32E-05 | hypermethylated |

|            |         |             |          |          |                 |
|------------|---------|-------------|----------|----------|-----------------|
| cg00924143 | 0.07104 | 0.195581622 | 1.461067 | 3.57E-05 | hypermethylated |
| cg04613834 | 0.11353 | 0.312489189 | 1.460733 | 1.82E-05 | hypermethylated |
| cg13378628 | 0.07865 | 0.216450811 | 1.460521 | 0.000115 | hypermethylated |
| cg19095600 | 0.1143  | 0.314547027 | 1.46045  | 2.10E-05 | hypermethylated |
| cg26452056 | 0.1087  | 0.299087568 | 1.460216 | 9.82E-06 | hypermethylated |
| cg13342435 | 0.13069 | 0.359558378 | 1.460077 | 2.21E-05 | hypermethylated |
| cg23437459 | 0.10943 | 0.301022162 | 1.459861 | 5.31E-05 | hypermethylated |
| cg08528626 | 0.13823 | 0.380154054 | 1.459513 | 5.86E-05 | hypermethylated |
| cg27180153 | 0.16201 | 0.44541027  | 1.459052 | 1.96E-06 | hypermethylated |
| cg04138502 | 0.1068  | 0.293608108 | 1.45898  | 0.00097  | hypermethylated |
| cg10068300 | 0.11256 | 0.309441081 | 1.458971 | 9.96E-06 | hypermethylated |
| cg01175812 | 0.08339 | 0.229225946 | 1.458824 | 3.04E-05 | hypermethylated |
| cg01560873 | 0.16877 | 0.463832973 | 1.458547 | 1.04E-05 | hypermethylated |
| cg08286181 | 0.14455 | 0.397127568 | 1.458034 | 6.57E-06 | hypermethylated |
| cg09986292 | 0.11194 | 0.307520541 | 1.457957 | 1.40E-05 | hypermethylated |
| cg03369269 | 0.10483 | 0.287959459 | 1.457814 | 0.000534 | hypermethylated |
| cg03698009 | 0.12775 | 0.350878378 | 1.457648 | 1.08E-05 | hypermethylated |
| cg21575295 | 0.09625 | 0.264352432 | 1.457604 | 1.50E-05 | hypermethylated |
| cg21606928 | 0.19796 | 0.54360973  | 1.457362 | 8.83E-06 | hypermethylated |
| cg26195356 | 0.15202 | 0.417352432 | 1.457005 | 1.58E-05 | hypermethylated |
| cg22055728 | 0.09805 | 0.269172973 | 1.456944 | 1.28E-05 | hypermethylated |
| cg00470955 | 0.08807 | 0.241765946 | 1.456888 | 2.51E-05 | hypermethylated |
| cg03469054 | 0.139   | 0.381536216 | 1.456735 | 2.78E-05 | hypermethylated |
| cg23967544 | 0.13705 | 0.376123243 | 1.456503 | 2.57E-06 | hypermethylated |
| cg01916115 | 0.1162  | 0.318817297 | 1.45612  | 1.33E-05 | hypermethylated |
| cg03265671 | 0.10979 | 0.301207027 | 1.456009 | 3.00E-05 | hypermethylated |
| cg00441573 | 0.13464 | 0.369325405 | 1.455785 | 2.64E-05 | hypermethylated |
| cg14631386 | 0.11027 | 0.302465405 | 1.45573  | 0.000303 | hypermethylated |
| cg09655666 | 0.16994 | 0.466136757 | 1.455728 | 2.78E-05 | hypermethylated |
| cg00263760 | 0.13546 | 0.371550811 | 1.455693 | 0.00012  | hypermethylated |
| cg07664198 | 0.15412 | 0.422719459 | 1.455646 | 9.57E-06 | hypermethylated |
| cg07466705 | 0.12767 | 0.350104865 | 1.455368 | 8.63E-05 | hypermethylated |
| cg21831931 | 0.11827 | 0.324308108 | 1.455281 | 7.72E-06 | hypermethylated |
| cg07102705 | 0.11378 | 0.311976216 | 1.455189 | 9.49E-05 | hypermethylated |
| cg15086113 | 0.11804 | 0.323641622 | 1.455121 | 6.62E-05 | hypermethylated |
| cg08638184 | 0.12449 | 0.341325946 | 1.45512  | 2.39E-05 | hypermethylated |
| cg13816321 | 0.14186 | 0.388934595 | 1.45506  | 7.42E-06 | hypermethylated |
| cg21754400 | 0.1067  | 0.292522162 | 1.454986 | 3.85E-05 | hypermethylated |
| cg18628094 | 0.12749 | 0.34947027  | 1.454786 | 1.39E-05 | hypermethylated |
| cg10915263 | 0.11129 | 0.305009189 | 1.454529 | 9.69E-06 | hypermethylated |
| cg16377881 | 0.11926 | 0.326765946 | 1.454147 | 0.000449 | hypermethylated |
| cg15829088 | 0.14716 | 0.403194054 | 1.454089 | 5.58E-06 | hypermethylated |
| cg06550462 | 0.09588 | 0.262646486 | 1.45382  | 2.21E-05 | hypermethylated |
| cg14283758 | 0.111   | 0.304025946 | 1.453635 | 0.000126 | hypermethylated |
| cg07897690 | 0.10243 | 0.280488649 | 1.453304 | 2.64E-06 | hypermethylated |
| cg09899185 | 0.14663 | 0.40142     | 1.452932 | 2.21E-05 | hypermethylated |
| cg11308277 | 0.10681 | 0.29236973  | 1.452747 | 3.04E-05 | hypermethylated |
| cg12105941 | 0.16725 | 0.457743243 | 1.452532 | 2.27E-05 | hypermethylated |
| cg23381749 | 0.10378 | 0.283978919 | 1.452255 | 4.76E-05 | hypermethylated |
| cg05576262 | 0.16399 | 0.448702162 | 1.45215  | 1.94E-05 | hypermethylated |
| cg26071016 | 0.13415 | 0.367049189 | 1.452126 | 8.04E-06 | hypermethylated |
| cg07919443 | 0.12007 | 0.32850973  | 1.45206  | 7.65E-05 | hypermethylated |
| cg18115040 | 0.16048 | 0.439065405 | 1.452042 | 5.73E-06 | hypermethylated |
| cg18907180 | 0.12103 | 0.331091351 | 1.451865 | 1.92E-05 | hypermethylated |
| cg02509825 | 0.10324 | 0.282405405 | 1.451766 | 4.60E-06 | hypermethylated |
| cg09486778 | 0.14003 | 0.382939459 | 1.45138  | 2.96E-05 | hypermethylated |
| cg03608712 | 0.08813 | 0.241003243 | 1.451347 | 3.76E-05 | hypermethylated |
| cg06567373 | 0.13912 | 0.380214054 | 1.450482 | 1.58E-06 | hypermethylated |

|            |         |             |          |          |                 |
|------------|---------|-------------|----------|----------|-----------------|
| cg04127342 | 0.1696  | 0.463448108 | 1.450272 | 1.18E-05 | hypermethylated |
| cg17863912 | 0.13323 | 0.364048649 | 1.450212 | 7.32E-06 | hypermethylated |
| cg10281002 | 0.13113 | 0.35812     | 1.449445 | 2.35E-05 | hypermethylated |
| cg05107500 | 0.11392 | 0.311044324 | 1.449099 | 7.52E-06 | hypermethylated |
| cg02631462 | 0.10733 | 0.293005946 | 1.448877 | 0.000152 | hypermethylated |
| cg26312150 | 0.11787 | 0.321745946 | 1.448725 | 1.66E-05 | hypermethylated |
| cg13398291 | 0.11019 | 0.300759459 | 1.448617 | 1.58E-05 | hypermethylated |
| cg05697849 | 0.17699 | 0.482994054 | 1.448338 | 1.04E-05 | hypermethylated |
| cg23618440 | 0.11691 | 0.318957838 | 1.447967 | 0.000166 | hypermethylated |
| cg07788092 | 0.15597 | 0.425481622 | 1.447828 | 5.73E-06 | hypermethylated |
| cg16795307 | 0.15374 | 0.419317838 | 1.447552 | 2.51E-05 | hypermethylated |
| cg14852384 | 0.12957 | 0.353266486 | 1.447025 | 5.73E-06 | hypermethylated |
| cg23668184 | 0.15616 | 0.425729189 | 1.446911 | 2.18E-05 | hypermethylated |
| cg24923694 | 0.14915 | 0.406614054 | 1.446896 | 1.15E-05 | hypermethylated |
| cg12973941 | 0.15369 | 0.418977297 | 1.446849 | 5.07E-06 | hypermethylated |
| cg22885558 | 0.11243 | 0.306497297 | 1.446847 | 1.62E-05 | hypermethylated |
| cg20950011 | 0.10424 | 0.284112973 | 1.446556 | 1.50E-05 | hypermethylated |
| cg10334354 | 0.13283 | 0.362006486 | 1.446435 | 3.40E-05 | hypermethylated |
| cg04413320 | 0.13447 | 0.366473514 | 1.446425 | 2.04E-05 | hypermethylated |
| cg11060276 | 0.09531 | 0.259717297 | 1.446243 | 3.36E-05 | hypermethylated |
| cg05640128 | 0.13169 | 0.358824324 | 1.446132 | 3.95E-05 | hypermethylated |
| cg06015218 | 0.09874 | 0.268996757 | 1.445882 | 0.000107 | hypermethylated |
| cg08132837 | 0.07916 | 0.215631351 | 1.445723 | 2.51E-05 | hypermethylated |
| cg27338487 | 0.09827 | 0.267673514 | 1.445651 | 7.72E-06 | hypermethylated |
| cg18912209 | 0.11682 | 0.318117297 | 1.445272 | 0.000155 | hypermethylated |
| cg20981086 | 0.18302 | 0.498385946 | 1.445262 | 4.86E-06 | hypermethylated |
| cg21639114 | 0.11337 | 0.308712973 | 1.445227 | 3.49E-05 | hypermethylated |
| cg02115911 | 0.14038 | 0.382257838 | 1.445209 | 4.82E-05 | hypermethylated |
| cg03152288 | 0.08641 | 0.235295676 | 1.445205 | 3.00E-05 | hypermethylated |
| cg23676551 | 0.12024 | 0.327388649 | 1.445087 | 0.000374 | hypermethylated |
| cg03041738 | 0.11073 | 0.301474595 | 1.44499  | 0.0002   | hypermethylated |
| cg11743349 | 0.10726 | 0.29201027  | 1.444907 | 1.02E-05 | hypermethylated |
| cg06812991 | 0.10182 | 0.277157297 | 1.444684 | 2.32E-05 | hypermethylated |
| cg18026588 | 0.11924 | 0.324536216 | 1.444511 | 9.95E-05 | hypermethylated |
| cg03672342 | 0.13566 | 0.369207027 | 1.444435 | 7.84E-05 | hypermethylated |
| cg15267232 | 0.14579 | 0.396611892 | 1.443836 | 0.000335 | hypermethylated |
| cg12166610 | 0.14183 | 0.385757838 | 1.443533 | 3.15E-05 | hypermethylated |
| cg16419354 | 0.1395  | 0.379307027 | 1.443101 | 7.47E-05 | hypermethylated |
| cg17918002 | 0.11534 | 0.313554595 | 1.442824 | 1.04E-05 | hypermethylated |
| cg10633658 | 0.11309 | 0.307331892 | 1.442326 | 3.21E-06 | hypermethylated |
| cg00714740 | 0.14103 | 0.383243784 | 1.44226  | 1.75E-05 | hypermethylated |
| cg22605303 | 0.10324 | 0.28053027  | 1.442154 | 6.05E-06 | hypermethylated |
| cg16764637 | 0.13078 | 0.355350811 | 1.442102 | 8.37E-06 | hypermethylated |
| cg26568372 | 0.15493 | 0.42092     | 1.44193  | 5.73E-06 | hypermethylated |
| cg00840960 | 0.11964 | 0.325015676 | 1.441809 | 0.000219 | hypermethylated |
| cg06737561 | 0.16373 | 0.444744324 | 1.441658 | 6.39E-06 | hypermethylated |
| cg06842954 | 0.13687 | 0.37178     | 1.441643 | 3.00E-05 | hypermethylated |
| cg04122873 | 0.12752 | 0.346322703 | 1.441393 | 0.000426 | hypermethylated |
| cg09831105 | 0.09749 | 0.264761622 | 1.441368 | 0.00017  | hypermethylated |
| cg06922606 | 0.12047 | 0.327155676 | 1.441303 | 3.67E-05 | hypermethylated |
| cg13066983 | 0.12707 | 0.345017838 | 1.441047 | 0.000117 | hypermethylated |
| cg08053686 | 0.13245 | 0.359623784 | 1.441041 | 5.43E-06 | hypermethylated |
| cg21210758 | 0.13074 | 0.354977838 | 1.441028 | 4.15E-05 | hypermethylated |
| cg23954787 | 0.12659 | 0.343663784 | 1.440834 | 1.09E-05 | hypermethylated |
| cg03656899 | 0.10534 | 0.285945405 | 1.440686 | 2.15E-05 | hypermethylated |
| cg03599078 | 0.17037 | 0.462463243 | 1.440667 | 1.93E-06 | hypermethylated |
| cg16240162 | 0.13871 | 0.376364324 | 1.440058 | 1.94E-05 | hypermethylated |
| cg16804284 | 0.14194 | 0.385116757 | 1.440015 | 5.65E-05 | hypermethylated |

|            |         |             |          |          |                 |
|------------|---------|-------------|----------|----------|-----------------|
| cg11248413 | 0.11271 | 0.305738378 | 1.439682 | 0.000132 | hypermethylated |
| cg01650904 | 0.12262 | 0.332566486 | 1.439448 | 6.75E-06 | hypermethylated |
| cg02078690 | 0.16453 | 0.446030811 | 1.438793 | 8.15E-06 | hypermethylated |
| cg10414985 | 0.12806 | 0.347155135 | 1.438761 | 1.09E-05 | hypermethylated |
| cg22048474 | 0.10205 | 0.276636216 | 1.438714 | 5.72E-05 | hypermethylated |
| cg16404157 | 0.16242 | 0.440268649 | 1.438655 | 3.00E-05 | hypermethylated |
| cg16206659 | 0.16002 | 0.433659459 | 1.43831  | 1.94E-05 | hypermethylated |
| cg16940012 | 0.13757 | 0.372802703 | 1.438246 | 9.82E-06 | hypermethylated |
| cg09471659 | 0.13265 | 0.35944973  | 1.438165 | 3.23E-05 | hypermethylated |
| cg06444755 | 0.11345 | 0.307311892 | 1.437647 | 2.57E-05 | hypermethylated |
| cg03764518 | 0.13632 | 0.369174054 | 1.437304 | 1.39E-05 | hypermethylated |
| cg11755405 | 0.1307  | 0.353927027 | 1.437193 | 4.58E-05 | hypermethylated |
| cg25136495 | 0.16836 | 0.455884324 | 1.437118 | 1.21E-05 | hypermethylated |
| cg10679301 | 0.08842 | 0.239398919 | 1.436972 | 6.78E-05 | hypermethylated |
| cg11600596 | 0.13979 | 0.378389189 | 1.43661  | 6.46E-05 | hypermethylated |
| cg10972873 | 0.12484 | 0.337894595 | 1.436493 | 2.10E-05 | hypermethylated |
| cg07135732 | 0.10868 | 0.294056216 | 1.436006 | 5.58E-06 | hypermethylated |
| cg05977002 | 0.16643 | 0.450297297 | 1.435962 | 1.18E-05 | hypermethylated |
| cg15662768 | 0.13526 | 0.365952432 | 1.435921 | 0.000129 | hypermethylated |
| cg12614105 | 0.12402 | 0.335447027 | 1.435512 | 1.92E-05 | hypermethylated |
| cg24884142 | 0.14319 | 0.387295676 | 1.435505 | 3.69E-06 | hypermethylated |
| cg26752526 | 0.09563 | 0.258639459 | 1.435407 | 0.000155 | hypermethylated |
| cg05756220 | 0.1303  | 0.352328108 | 1.435082 | 2.71E-05 | hypermethylated |
| cg13787438 | 0.09642 | 0.2607      | 1.434986 | 4.94E-05 | hypermethylated |
| cg00070680 | 0.10588 | 0.286275135 | 1.434972 | 0.000135 | hypermethylated |
| cg17500587 | 0.10816 | 0.292416757 | 1.434859 | 5.19E-05 | hypermethylated |
| cg26055770 | 0.10694 | 0.288944324 | 1.43399  | 0.000268 | hypermethylated |
| cg18044383 | 0.11094 | 0.299751892 | 1.433989 | 6.54E-05 | hypermethylated |
| cg08305436 | 0.20579 | 0.556028108 | 1.433985 | 5.28E-06 | hypermethylated |
| cg21230493 | 0.12548 | 0.339007568 | 1.43386  | 1.73E-05 | hypermethylated |
| cg12016437 | 0.10657 | 0.287918378 | 1.433859 | 8.63E-05 | hypermethylated |
| cg23967169 | 0.10628 | 0.287125946 | 1.433814 | 5.45E-05 | hypermethylated |
| cg04596004 | 0.12009 | 0.324430811 | 1.433795 | 5.73E-06 | hypermethylated |
| cg22650617 | 0.14588 | 0.393978919 | 1.433336 | 5.19E-05 | hypermethylated |
| cg08720517 | 0.1286  | 0.34731027  | 1.433334 | 9.05E-05 | hypermethylated |
| cg26963356 | 0.12694 | 0.342793514 | 1.433193 | 0.000178 | hypermethylated |
| cg01082512 | 0.09983 | 0.269538919 | 1.432948 | 5.58E-05 | hypermethylated |
| cg01075271 | 0.12341 | 0.333180541 | 1.432845 | 7.84E-05 | hypermethylated |
| cg07906632 | 0.1176  | 0.317450811 | 1.432645 | 0.000154 | hypermethylated |
| cg13207326 | 0.14061 | 0.379561081 | 1.432633 | 6.57E-06 | hypermethylated |
| cg11427855 | 0.11587 | 0.31277027  | 1.432596 | 3.76E-05 | hypermethylated |
| cg05892568 | 0.12531 | 0.338238919 | 1.432541 | 1.35E-05 | hypermethylated |
| cg05215925 | 0.11379 | 0.307138378 | 1.432515 | 2.16E-06 | hypermethylated |
| cg06495961 | 0.16884 | 0.455675135 | 1.432349 | 2.39E-05 | hypermethylated |
| cg23154526 | 0.11376 | 0.307014054 | 1.432311 | 1.31E-05 | hypermethylated |
| cg18295183 | 0.15082 | 0.406968649 | 1.43209  | 1.99E-05 | hypermethylated |
| cg01498609 | 0.1358  | 0.366416216 | 1.432    | 6.31E-05 | hypermethylated |
| cg19349861 | 0.08379 | 0.226037838 | 1.431714 | 6.39E-06 | hypermethylated |
| cg03480337 | 0.13827 | 0.372869189 | 1.431181 | 5.32E-05 | hypermethylated |
| cg18341512 | 0.09807 | 0.264462162 | 1.431178 | 1.26E-06 | hypermethylated |
| cg03401738 | 0.10984 | 0.296167568 | 1.43101  | 6.15E-05 | hypermethylated |
| cg11148130 | 0.11104 | 0.299393514 | 1.430963 | 0.0003   | hypermethylated |
| cg26517663 | 0.145   | 0.390934054 | 1.430872 | 1.60E-05 | hypermethylated |
| cg14866863 | 0.19016 | 0.512625946 | 1.430693 | 1.06E-05 | hypermethylated |
| cg27291304 | 0.16238 | 0.437635135 | 1.430355 | 9.57E-06 | hypermethylated |
| cg16389399 | 0.13323 | 0.359021622 | 1.430152 | 7.72E-06 | hypermethylated |
| cg26405376 | 0.11397 | 0.307086486 | 1.429991 | 2.57E-05 | hypermethylated |
| cg01283289 | 0.09777 | 0.263414595 | 1.429872 | 1.20E-05 | hypermethylated |



|            |         |             |          |          |                 |
|------------|---------|-------------|----------|----------|-----------------|
| cg18430128 | 0.1349  | 0.363423784 | 1.429762 | 6.78E-05 | hypermethylated |
| cg04059773 | 0.14277 | 0.384498378 | 1.429285 | 3.44E-05 | hypermethylated |
| cg14304469 | 0.12468 | 0.335754595 | 1.429177 | 9.05E-05 | hypermethylated |
| cg02232208 | 0.14027 | 0.377724865 | 1.429129 | 1.21E-05 | hypermethylated |
| cg16242629 | 0.17824 | 0.479964324 | 1.429106 | 1.58E-05 | hypermethylated |
| cg24085946 | 0.12228 | 0.329248108 | 1.428987 | 0.00134  | hypermethylated |
| cg09469566 | 0.16515 | 0.444670811 | 1.428961 | 8.83E-06 | hypermethylated |
| cg10243939 | 0.12067 | 0.324879459 | 1.428837 | 1.01E-05 | hypermethylated |
| cg26492514 | 0.12468 | 0.335652973 | 1.42874  | 2.71E-05 | hypermethylated |
| cg18173058 | 0.1604  | 0.431814054 | 1.428736 | 1.50E-05 | hypermethylated |
| cg23487201 | 0.14149 | 0.380779459 | 1.428256 | 6.75E-06 | hypermethylated |
| cg01002253 | 0.14755 | 0.39706     | 1.428153 | 1.35E-05 | hypermethylated |
| cg00497232 | 0.09807 | 0.263904865 | 1.428134 | 0.000313 | hypermethylated |
| cg14188639 | 0.13699 | 0.368596757 | 1.427973 | 2.27E-05 | hypermethylated |
| cg03181478 | 0.09856 | 0.265178919 | 1.427892 | 0.000168 | hypermethylated |
| cg10119075 | 0.14477 | 0.389477297 | 1.427777 | 8.37E-06 | hypermethylated |
| cg18482268 | 0.11367 | 0.305772973 | 1.427609 | 7.38E-05 | hypermethylated |
| cg26082257 | 0.11224 | 0.301888649 | 1.42743  | 0.000117 | hypermethylated |
| cg20928234 | 0.10957 | 0.294668108 | 1.427238 | 1.64E-05 | hypermethylated |
| cg16265906 | 0.09826 | 0.264246486 | 1.427208 | 2.21E-05 | hypermethylated |
| cg05184456 | 0.15504 | 0.416906486 | 1.427083 | 1.71E-05 | hypermethylated |
| cg18774195 | 0.12412 | 0.333684324 | 1.426748 | 1.01E-05 | hypermethylated |
| cg26118906 | 0.12125 | 0.325895676 | 1.426425 | 2.45E-05 | hypermethylated |
| cg02011374 | 0.12162 | 0.326768108 | 1.425887 | 1.46E-05 | hypermethylated |
| cg13644317 | 0.15233 | 0.409238919 | 1.425743 | 4.48E-06 | hypermethylated |
| cg25102370 | 0.12239 | 0.328802162 | 1.425734 | 1.71E-05 | hypermethylated |
| cg00109302 | 0.12888 | 0.346152432 | 1.425379 | 2.21E-05 | hypermethylated |
| cg21242918 | 0.1588  | 0.426448108 | 1.425159 | 4.36E-05 | hypermethylated |
| cg22428147 | 0.14144 | 0.379825405 | 1.425146 | 4.05E-05 | hypermethylated |
| cg07936950 | 0.16938 | 0.454834595 | 1.425078 | 4.94E-05 | hypermethylated |
| cg10683251 | 0.08402 | 0.225617838 | 1.425076 | 1.62E-05 | hypermethylated |
| cg27638196 | 0.13784 | 0.370108108 | 1.424952 | 6.95E-05 | hypermethylated |
| cg01800521 | 0.1308  | 0.351195135 | 1.42491  | 0.000112 | hypermethylated |
| cg01181415 | 0.15386 | 0.413046486 | 1.424686 | 3.90E-05 | hypermethylated |
| cg00529958 | 0.14857 | 0.398778919 | 1.424446 | 3.54E-06 | hypermethylated |
| cg08534653 | 0.16642 | 0.446654054 | 1.424329 | 2.32E-05 | hypermethylated |
| cg15199678 | 0.12212 | 0.327755676 | 1.424321 | 7.32E-06 | hypermethylated |
| cg00922781 | 0.10703 | 0.287213514 | 1.424108 | 1.75E-05 | hypermethylated |
| cg17525102 | 0.14111 | 0.378570811 | 1.423743 | 8.60E-06 | hypermethylated |
| cg03462380 | 0.16109 | 0.432141622 | 1.423637 | 3.57E-05 | hypermethylated |
| cg23234640 | 0.12168 | 0.326403243 | 1.423563 | 1.25E-05 | hypermethylated |
| cg11563844 | 0.13778 | 0.369568108 | 1.423474 | 6.46E-05 | hypermethylated |
| cg21590264 | 0.1298  | 0.34805027  | 1.423005 | 1.67E-06 | hypermethylated |
| cg22534145 | 0.15513 | 0.415872432 | 1.422663 | 9.16E-05 | hypermethylated |
| cg04996873 | 0.13166 | 0.352935676 | 1.422588 | 7.84E-05 | hypermethylated |
| cg11286436 | 0.09769 | 0.261870811 | 1.422572 | 4.47E-05 | hypermethylated |
| cg10422777 | 0.13802 | 0.369949189 | 1.42245  | 5.28E-06 | hypermethylated |
| cg14972743 | 0.14951 | 0.400703784 | 1.422294 | 0.000145 | hypermethylated |
| cg14258623 | 0.11485 | 0.307802162 | 1.422253 | 3.49E-05 | hypermethylated |
| cg10421002 | 0.09509 | 0.254815676 | 1.422088 | 1.09E-05 | hypermethylated |
| cg16043357 | 0.15834 | 0.424301081 | 1.422063 | 2.10E-06 | hypermethylated |
| cg01708273 | 0.16078 | 0.430819459 | 1.421995 | 1.09E-05 | hypermethylated |
| cg07893575 | 0.09278 | 0.248608108 | 1.421988 | 1.09E-05 | hypermethylated |
| cg02835822 | 0.11564 | 0.309837838 | 1.421873 | 5.58E-05 | hypermethylated |
| cg16791619 | 0.13587 | 0.364032432 | 1.42184  | 9.72E-05 | hypermethylated |
| cg04974913 | 0.07666 | 0.205355135 | 1.421575 | 4.26E-05 | hypermethylated |
| cg27420236 | 0.10927 | 0.292666486 | 1.42136  | 0.000268 | hypermethylated |
| cg25561762 | 0.1522  | 0.40763027  | 1.421293 | 2.87E-06 | hypermethylated |

|            |         |             |          |          |                 |
|------------|---------|-------------|----------|----------|-----------------|
| cg04949206 | 0.1059  | 0.283614054 | 1.421226 | 2.32E-05 | hypermethylated |
| cg00475820 | 0.09345 | 0.250255676 | 1.421136 | 8.83E-06 | hypermethylated |
| cg04064644 | 0.1293  | 0.34624     | 1.42105  | 2.49E-06 | hypermethylated |
| cg23306526 | 0.08757 | 0.23446973  | 1.420893 | 6.05E-06 | hypermethylated |
| cg19801921 | 0.15062 | 0.403265405 | 1.420816 | 6.05E-06 | hypermethylated |
| cg17429000 | 0.14876 | 0.398235135 | 1.420634 | 5.32E-05 | hypermethylated |
| cg10157251 | 0.10059 | 0.269280541 | 1.420623 | 1.06E-05 | hypermethylated |
| cg26756625 | 0.11779 | 0.315294054 | 1.420481 | 1.18E-05 | hypermethylated |
| cg19610529 | 0.16157 | 0.43248     | 1.420474 | 1.84E-05 | hypermethylated |
| cg07703401 | 0.13169 | 0.352457838 | 1.420305 | 6.46E-05 | hypermethylated |
| cg20585038 | 0.11596 | 0.310290811 | 1.419994 | 4.05E-05 | hypermethylated |
| cg24642065 | 0.10354 | 0.277046486 | 1.41994  | 5.79E-05 | hypermethylated |
| cg00279001 | 0.12311 | 0.329399459 | 1.41989  | 1.28E-05 | hypermethylated |
| cg13481638 | 0.09566 | 0.25592     | 1.419705 | 3.85E-05 | hypermethylated |
| cg09789636 | 0.10579 | 0.283012432 | 1.419662 | 1.09E-05 | hypermethylated |
| cg16294566 | 0.14768 | 0.395052973 | 1.419572 | 2.21E-05 | hypermethylated |
| cg23901857 | 0.10214 | 0.273221081 | 1.419521 | 2.13E-05 | hypermethylated |
| cg26527487 | 0.10873 | 0.290823243 | 1.419393 | 1.84E-05 | hypermethylated |
| cg21609640 | 0.11003 | 0.294295135 | 1.419367 | 9.05E-05 | hypermethylated |
| cg25340966 | 0.12921 | 0.345576216 | 1.419286 | 0.000365 | hypermethylated |
| cg09451457 | 0.15597 | 0.417140541 | 1.419265 | 9.07E-06 | hypermethylated |
| cg24161501 | 0.10639 | 0.284529189 | 1.419214 | 4.47E-05 | hypermethylated |
| cg22162281 | 0.1294  | 0.346060541 | 1.419187 | 0.000191 | hypermethylated |
| cg10534507 | 0.12821 | 0.342874054 | 1.41917  | 7.12E-06 | hypermethylated |
| cg13352836 | 0.12004 | 0.320998919 | 1.419053 | 9.60E-05 | hypermethylated |
| cg01901262 | 0.17502 | 0.468003243 | 1.418999 | 8.42E-05 | hypermethylated |
| cg13923530 | 0.13201 | 0.352989189 | 1.418977 | 2.64E-05 | hypermethylated |
| cg03496114 | 0.12924 | 0.345507568 | 1.418665 | 3.76E-05 | hypermethylated |
| cg01926238 | 0.12029 | 0.321514054 | 1.418365 | 5.45E-05 | hypermethylated |
| cg09275869 | 0.11515 | 0.307683784 | 1.417934 | 0.000166 | hypermethylated |
| cg05523911 | 0.1813  | 0.484332973 | 1.41762  | 6.57E-06 | hypermethylated |
| cg09543255 | 0.13865 | 0.370384865 | 1.417578 | 4.15E-05 | hypermethylated |
| cg22286936 | 0.15525 | 0.414654054 | 1.417315 | 2.15E-05 | hypermethylated |
| cg05589784 | 0.19725 | 0.526634595 | 1.416777 | 9.82E-06 | hypermethylated |
| cg26292150 | 0.14666 | 0.391491892 | 1.416507 | 0.000229 | hypermethylated |
| cg16359550 | 0.13664 | 0.364722162 | 1.416418 | 4.15E-05 | hypermethylated |
| cg09159022 | 0.14969 | 0.399484865 | 1.416163 | 1.84E-05 | hypermethylated |
| cg02167020 | 0.10003 | 0.266927027 | 1.416013 | 0.000296 | hypermethylated |
| cg03531247 | 0.15145 | 0.404100541 | 1.415873 | 1.50E-05 | hypermethylated |
| cg16851417 | 0.15687 | 0.418516757 | 1.415716 | 9.57E-06 | hypermethylated |
| cg15775921 | 0.13314 | 0.355192432 | 1.415657 | 1.75E-05 | hypermethylated |
| cg05943996 | 0.11543 | 0.30791027  | 1.415492 | 7.75E-05 | hypermethylated |
| cg03182917 | 0.10207 | 0.272234054 | 1.415289 | 1.99E-05 | hypermethylated |
| cg13865810 | 0.11166 | 0.29770973  | 1.414794 | 3.49E-05 | hypermethylated |
| cg08273957 | 0.17103 | 0.455925946 | 1.41455  | 1.46E-05 | hypermethylated |
| cg00546005 | 0.12219 | 0.32572     | 1.414506 | 2.64E-05 | hypermethylated |
| cg18521914 | 0.0969  | 0.258263784 | 1.414277 | 9.96E-06 | hypermethylated |
| cg14123543 | 0.13686 | 0.364678378 | 1.413924 | 1.84E-05 | hypermethylated |
| cg07414571 | 0.08619 | 0.229657297 | 1.41389  | 2.45E-05 | hypermethylated |
| cg10806639 | 0.13987 | 0.372614054 | 1.413596 | 6.15E-05 | hypermethylated |
| cg07268058 | 0.12706 | 0.338482162 | 1.41357  | 3.32E-05 | hypermethylated |
| cg02446647 | 0.14505 | 0.386402703 | 1.413555 | 2.78E-05 | hypermethylated |
| cg24838010 | 0.08783 | 0.233969189 | 1.413533 | 0.000176 | hypermethylated |
| cg11849281 | 0.10595 | 0.282150811 | 1.413083 | 2.15E-05 | hypermethylated |
| cg10521851 | 0.10891 | 0.289958919 | 1.412712 | 0.000403 | hypermethylated |
| cg23279117 | 0.09633 | 0.256430811 | 1.412513 | 2.45E-05 | hypermethylated |
| cg00626856 | 0.16094 | 0.428383784 | 1.412381 | 2.49E-06 | hypermethylated |
| cg21591742 | 0.14367 | 0.382381081 | 1.412252 | 6.15E-05 | hypermethylated |

|            |         |             |          |          |                 |
|------------|---------|-------------|----------|----------|-----------------|
| cg13260012 | 0.10615 | 0.282419459 | 1.411735 | 2.36E-06 | hypermethylated |
| cg02469871 | 0.12321 | 0.327756216 | 1.411504 | 2.92E-05 | hypermethylated |
| cg13502741 | 0.15521 | 0.412839459 | 1.411359 | 1.99E-05 | hypermethylated |
| cg07411620 | 0.14506 | 0.38566     | 1.41068  | 2.64E-05 | hypermethylated |
| cg24089118 | 0.10738 | 0.285458378 | 1.410555 | 0.000303 | hypermethylated |
| cg10127275 | 0.12504 | 0.332387027 | 1.410474 | 2.57E-05 | hypermethylated |
| cg12433277 | 0.11736 | 0.311927027 | 1.410268 | 6.54E-05 | hypermethylated |
| cg01396176 | 0.1196  | 0.317838378 | 1.410076 | 6.39E-06 | hypermethylated |
| cg20434529 | 0.10433 | 0.277225405 | 1.409905 | 0.000138 | hypermethylated |
| cg02423064 | 0.13818 | 0.367144324 | 1.409798 | 9.82E-06 | hypermethylated |
| cg06829299 | 0.14535 | 0.386005405 | 1.40909  | 9.57E-06 | hypermethylated |
| cg09233651 | 0.16428 | 0.436241622 | 1.408971 | 1.12E-05 | hypermethylated |
| cg05571970 | 0.13192 | 0.35031027  | 1.40897  | 1.02E-05 | hypermethylated |
| cg17941572 | 0.17607 | 0.467527027 | 1.408901 | 2.42E-06 | hypermethylated |
| cg04261138 | 0.11782 | 0.312727568 | 1.408322 | 9.07E-06 | hypermethylated |
| cg22848150 | 0.07508 | 0.199213514 | 1.407815 | 1.35E-05 | hypermethylated |
| cg11117878 | 0.10783 | 0.286021081 | 1.407363 | 1.20E-05 | hypermethylated |
| cg07811110 | 0.15758 | 0.417902162 | 1.407081 | 8.94E-05 | hypermethylated |
| cg25938646 | 0.13186 | 0.349501622 | 1.406292 | 3.76E-05 | hypermethylated |
| cg14570291 | 0.09458 | 0.250651351 | 1.406075 | 9.95E-05 | hypermethylated |
| cg25574024 | 0.14319 | 0.379464324 | 1.406034 | 8.84E-05 | hypermethylated |
| cg06511917 | 0.11362 | 0.301043784 | 1.405757 | 6.39E-06 | hypermethylated |
| cg18301583 | 0.15325 | 0.405884324 | 1.405182 | 9.05E-05 | hypermethylated |
| cg13610307 | 0.16589 | 0.439345946 | 1.40513  | 0.000135 | hypermethylated |
| cg03696599 | 0.14208 | 0.376195135 | 1.404778 | 2.04E-05 | hypermethylated |
| cg22730047 | 0.13907 | 0.368151351 | 1.404488 | 3.39E-06 | hypermethylated |
| cg09388605 | 0.14788 | 0.391386486 | 1.404167 | 1.66E-05 | hypermethylated |
| cg00174428 | 0.13703 | 0.362619459 | 1.403965 | 6.54E-05 | hypermethylated |
| cg11312408 | 0.12793 | 0.338484324 | 1.403734 | 1.28E-05 | hypermethylated |
| cg26727693 | 0.1589  | 0.420397297 | 1.403634 | 3.57E-05 | hypermethylated |
| cg25988034 | 0.11701 | 0.309560541 | 1.40359  | 4.05E-05 | hypermethylated |
| cg23003783 | 0.15439 | 0.408441622 | 1.403551 | 2.71E-05 | hypermethylated |
| cg17713376 | 0.10919 | 0.288858378 | 1.403522 | 4.70E-05 | hypermethylated |
| cg18507138 | 0.12148 | 0.321352432 | 1.403438 | 6.01E-05 | hypermethylated |
| cg00326719 | 0.09669 | 0.255676216 | 1.402879 | 5.72E-05 | hypermethylated |
| cg21806015 | 0.094   | 0.248526486 | 1.402667 | 5.86E-05 | hypermethylated |
| cg11418477 | 0.11272 | 0.297976757 | 1.402456 | 1.75E-05 | hypermethylated |
| cg09896622 | 0.14199 | 0.375325405 | 1.402353 | 4.94E-05 | hypermethylated |
| cg06462347 | 0.12106 | 0.319994595 | 1.402325 | 0.000138 | hypermethylated |
| cg10443187 | 0.09057 | 0.239398919 | 1.402311 | 3.07E-05 | hypermethylated |
| cg27242132 | 0.15466 | 0.408669189 | 1.401833 | 6.62E-05 | hypermethylated |
| cg18824585 | 0.12998 | 0.343392973 | 1.401571 | 5.38E-05 | hypermethylated |
| cg24456365 | 0.13971 | 0.369090811 | 1.401541 | 2.48E-05 | hypermethylated |
| cg05455720 | 0.1437  | 0.379605946 | 1.401443 | 9.31E-06 | hypermethylated |
| cg01765111 | 0.13573 | 0.358526486 | 1.40134  | 7.12E-05 | hypermethylated |
| cg09294156 | 0.10894 | 0.287737838 | 1.401221 | 9.69E-06 | hypermethylated |
| cg07312654 | 0.11731 | 0.309759459 | 1.400822 | 4.26E-05 | hypermethylated |
| cg11438428 | 0.13603 | 0.359124324 | 1.400559 | 6.22E-06 | hypermethylated |
| cg20019985 | 0.16229 | 0.428365946 | 1.40027  | 1.38E-05 | hypermethylated |
| cg25717239 | 0.11397 | 0.300792432 | 1.400114 | 7.20E-05 | hypermethylated |
| cg04721934 | 0.07647 | 0.201755676 | 1.399643 | 1.09E-05 | hypermethylated |
| cg13208922 | 0.18304 | 0.482923243 | 1.399635 | 5.28E-06 | hypermethylated |
| cg05093169 | 0.14361 | 0.37884     | 1.399432 | 3.12E-06 | hypermethylated |
| cg08065657 | 0.15741 | 0.415236216 | 1.399405 | 2.79E-06 | hypermethylated |
| cg06354392 | 0.1262  | 0.332823784 | 1.399047 | 9.72E-05 | hypermethylated |
| cg12454814 | 0.10677 | 0.281571351 | 1.398994 | 4.26E-05 | hypermethylated |
| cg00982919 | 0.10039 | 0.264735135 | 1.398934 | 3.27E-05 | hypermethylated |
| cg03250019 | 0.15055 | 0.396940541 | 1.39868  | 1.89E-05 | hypermethylated |

|            |         |             |          |          |                 |
|------------|---------|-------------|----------|----------|-----------------|
| cg09330153 | 0.11083 | 0.292155676 | 1.398389 | 6.15E-05 | hypermethylated |
| cg25259711 | 0.11011 | 0.290198919 | 1.398097 | 9.82E-06 | hypermethylated |
| cg05128922 | 0.11625 | 0.306375676 | 1.398071 | 8.60E-06 | hypermethylated |
| cg05890785 | 0.1153  | 0.303737838 | 1.397434 | 8.32E-05 | hypermethylated |
| cg17555825 | 0.1547  | 0.407381081 | 1.396906 | 2.95E-06 | hypermethylated |
| cg20892990 | 0.11501 | 0.302811892 | 1.396663 | 4.70E-05 | hypermethylated |
| cg08587845 | 0.12461 | 0.328069189 | 1.39658  | 6.05E-06 | hypermethylated |
| cg19787532 | 0.10343 | 0.272275135 | 1.396411 | 1.62E-05 | hypermethylated |
| cg09127607 | 0.1642  | 0.431991892 | 1.39555  | 5.89E-06 | hypermethylated |
| cg01181227 | 0.10888 | 0.286331351 | 1.394947 | 3.85E-05 | hypermethylated |
| cg02084669 | 0.08821 | 0.231949189 | 1.394795 | 1.73E-05 | hypermethylated |
| cg05513806 | 0.16689 | 0.438805405 | 1.394684 | 2.51E-05 | hypermethylated |
| cg10634619 | 0.1176  | 0.309098919 | 1.394181 | 0.000117 | hypermethylated |
| cg25459450 | 0.07551 | 0.198448649 | 1.394026 | 2.21E-05 | hypermethylated |
| cg25622154 | 0.14749 | 0.38761027  | 1.39399  | 8.52E-05 | hypermethylated |
| cg14431006 | 0.11035 | 0.289946486 | 1.3937   | 3.53E-05 | hypermethylated |
| cg21900624 | 0.12676 | 0.333058919 | 1.393678 | 6.62E-05 | hypermethylated |
| cg06624154 | 0.12179 | 0.319978919 | 1.393581 | 2.89E-05 | hypermethylated |
| cg06000994 | 0.14427 | 0.378781622 | 1.392595 | 5.14E-06 | hypermethylated |
| cg15982972 | 0.09061 | 0.237884865 | 1.392521 | 7.42E-06 | hypermethylated |
| cg13300273 | 0.19742 | 0.518285405 | 1.392479 | 1.99E-05 | hypermethylated |
| cg10149225 | 0.1162  | 0.305037297 | 1.392376 | 1.99E-05 | hypermethylated |
| cg24830738 | 0.09082 | 0.238398919 | 1.392296 | 0.000191 | hypermethylated |
| cg17713539 | 0.12224 | 0.320866486 | 1.392257 | 7.32E-06 | hypermethylated |
| cg26953640 | 0.1375  | 0.360861081 | 1.392012 | 6.86E-05 | hypermethylated |
| cg03874199 | 0.12842 | 0.337026486 | 1.391992 | 7.12E-06 | hypermethylated |
| cg08652487 | 0.11393 | 0.298977297 | 1.391888 | 0.000189 | hypermethylated |
| cg07777008 | 0.13574 | 0.356200541 | 1.391844 | 2.74E-05 | hypermethylated |
| cg18274480 | 0.17837 | 0.468054595 | 1.391804 | 2.10E-05 | hypermethylated |
| cg06329574 | 0.13491 | 0.353992973 | 1.391723 | 6.31E-05 | hypermethylated |
| cg04651603 | 0.11239 | 0.294901622 | 1.39172  | 9.57E-06 | hypermethylated |
| cg16294013 | 0.1311  | 0.343982162 | 1.391666 | 3.57E-05 | hypermethylated |
| cg18008019 | 0.10642 | 0.279211892 | 1.391591 | 5.32E-05 | hypermethylated |
| cg10761315 | 0.14017 | 0.367721622 | 1.391436 | 1.99E-05 | hypermethylated |
| cg00614182 | 0.14165 | 0.37152973  | 1.391147 | 3.04E-05 | hypermethylated |
| cg00196414 | 0.10117 | 0.265305405 | 1.390873 | 7.52E-06 | hypermethylated |
| cg17696160 | 0.09798 | 0.256931892 | 1.390827 | 2.15E-05 | hypermethylated |
| cg26309457 | 0.12103 | 0.317362703 | 1.390768 | 5.25E-05 | hypermethylated |
| cg08811309 | 0.1201  | 0.314906486 | 1.390687 | 1.46E-05 | hypermethylated |
| cg03287574 | 0.17327 | 0.454257838 | 1.39049  | 5.00E-06 | hypermethylated |
| cg05825073 | 0.12607 | 0.330501622 | 1.390432 | 0.000613 | hypermethylated |
| cg08411068 | 0.11465 | 0.300427027 | 1.389778 | 2.79E-06 | hypermethylated |
| cg20404387 | 0.11066 | 0.289931351 | 1.389578 | 5.65E-05 | hypermethylated |
| cg08683938 | 0.11474 | 0.300533514 | 1.389157 | 0.000104 | hypermethylated |
| cg06936155 | 0.1141  | 0.298854054 | 1.389142 | 1.71E-05 | hypermethylated |
| cg24989962 | 0.13383 | 0.350525946 | 1.38912  | 0.000135 | hypermethylated |
| cg06749053 | 0.13846 | 0.362643784 | 1.389084 | 4.15E-05 | hypermethylated |
| cg16399049 | 0.13264 | 0.347383784 | 1.389014 | 2.57E-05 | hypermethylated |
| cg04130427 | 0.09916 | 0.259674054 | 1.388872 | 4.47E-05 | hypermethylated |
| cg15311814 | 0.15448 | 0.404464865 | 1.388594 | 7.12E-06 | hypermethylated |
| cg18454863 | 0.11815 | 0.30922973  | 1.388059 | 2.57E-05 | hypermethylated |
| cg26296364 | 0.12746 | 0.333582162 | 1.387998 | 1.58E-05 | hypermethylated |
| cg15910662 | 0.11016 | 0.288222703 | 1.387584 | 2.30E-05 | hypermethylated |
| cg18799217 | 0.1392  | 0.364174595 | 1.387471 | 3.49E-06 | hypermethylated |
| cg08455099 | 0.13976 | 0.365597297 | 1.387304 | 1.50E-05 | hypermethylated |
| cg11718030 | 0.12627 | 0.330296757 | 1.387251 | 5.06E-05 | hypermethylated |
| cg05306472 | 0.12155 | 0.317936216 | 1.387187 | 9.27E-05 | hypermethylated |
| cg22586653 | 0.11746 | 0.307228649 | 1.387143 | 4.15E-05 | hypermethylated |

|            |         |             |          |          |                 |
|------------|---------|-------------|----------|----------|-----------------|
| cg18839750 | 0.11622 | 0.303905946 | 1.386767 | 3.32E-05 | hypermethylated |
| cg05785155 | 0.12709 | 0.332180541 | 1.386117 | 2.23E-06 | hypermethylated |
| cg24975834 | 0.11889 | 0.310702703 | 1.385907 | 2.15E-05 | hypermethylated |
| cg05467160 | 0.14877 | 0.388781622 | 1.385876 | 2.05E-06 | hypermethylated |
| cg21215550 | 0.18525 | 0.484081622 | 1.385777 | 0.000145 | hypermethylated |
| cg24911113 | 0.20378 | 0.532365946 | 1.385406 | 9.07E-06 | hypermethylated |
| cg17653824 | 0.11082 | 0.289411351 | 1.384903 | 1.42E-05 | hypermethylated |
| cg23549358 | 0.09964 | 0.260202703 | 1.384839 | 2.64E-05 | hypermethylated |
| cg13677149 | 0.15969 | 0.41699027  | 1.38474  | 6.95E-05 | hypermethylated |
| cg16633951 | 0.13192 | 0.344422703 | 1.384517 | 0.000274 | hypermethylated |
| cg02639634 | 0.14085 | 0.367721622 | 1.384454 | 1.96E-06 | hypermethylated |
| cg15447540 | 0.11355 | 0.296380541 | 1.384123 | 2.64E-05 | hypermethylated |
| cg14579864 | 0.11923 | 0.311143784 | 1.383834 | 2.85E-05 | hypermethylated |
| cg02961004 | 0.19126 | 0.499055135 | 1.383664 | 1.66E-05 | hypermethylated |
| cg08258526 | 0.12721 | 0.331857838 | 1.383353 | 0.000155 | hypermethylated |
| cg09363735 | 0.10907 | 0.284528649 | 1.38332  | 0.000165 | hypermethylated |
| cg13338137 | 0.10435 | 0.272194595 | 1.383208 | 4.36E-05 | hypermethylated |
| cg27131891 | 0.17309 | 0.451487568 | 1.383164 | 7.65E-05 | hypermethylated |
| cg01281157 | 0.16251 | 0.423869189 | 1.383091 | 5.32E-05 | hypermethylated |
| cg01997272 | 0.15382 | 0.401203243 | 1.38309  | 2.15E-05 | hypermethylated |
| cg08991339 | 0.10713 | 0.279391351 | 1.382925 | 8.03E-05 | hypermethylated |
| cg15084543 | 0.2096  | 0.546283243 | 1.38201  | 1.58E-05 | hypermethylated |
| cg26504021 | 0.17279 | 0.450309189 | 1.381896 | 1.82E-05 | hypermethylated |
| cg23166389 | 0.11681 | 0.304354054 | 1.381587 | 2.64E-05 | hypermethylated |
| cg01791587 | 0.10715 | 0.279177838 | 1.381553 | 2.54E-05 | hypermethylated |
| cg17361203 | 0.10242 | 0.266835135 | 1.381451 | 0.00095  | hypermethylated |
| cg22694818 | 0.17916 | 0.466765946 | 1.381451 | 5.43E-06 | hypermethylated |
| cg13378934 | 0.10531 | 0.274309189 | 1.381161 | 6.62E-05 | hypermethylated |
| cg12653796 | 0.11313 | 0.294638919 | 1.380966 | 3.59E-06 | hypermethylated |
| cg18692678 | 0.13622 | 0.354728108 | 1.380775 | 3.15E-05 | hypermethylated |
| cg08276295 | 0.13522 | 0.352096216 | 1.380661 | 0.000132 | hypermethylated |
| cg25993718 | 0.13609 | 0.354296216 | 1.380395 | 9.57E-06 | hypermethylated |
| cg17793621 | 0.11086 | 0.288601081 | 1.380338 | 0.000204 | hypermethylated |
| cg17306747 | 0.16238 | 0.422703243 | 1.380271 | 6.75E-06 | hypermethylated |
| cg14859460 | 0.17717 | 0.461090811 | 1.379917 | 1.50E-05 | hypermethylated |
| cg12281565 | 0.09973 | 0.259419459 | 1.379187 | 3.90E-06 | hypermethylated |
| cg19048251 | 0.11696 | 0.304230811 | 1.379151 | 1.71E-05 | hypermethylated |
| cg09636202 | 0.127   | 0.330290811 | 1.378908 | 0.000293 | hypermethylated |
| cg27324426 | 0.12064 | 0.313722703 | 1.378782 | 4.05E-05 | hypermethylated |
| cg04972745 | 0.1563  | 0.406455676 | 1.37878  | 3.57E-05 | hypermethylated |
| cg23416788 | 0.12064 | 0.313663784 | 1.378511 | 4.82E-05 | hypermethylated |
| cg10384919 | 0.09962 | 0.258995676 | 1.378421 | 0.00035  | hypermethylated |
| cg22370006 | 0.12752 | 0.331252432 | 1.377208 | 2.32E-05 | hypermethylated |
| cg00423153 | 0.20612 | 0.535395135 | 1.37712  | 7.93E-05 | hypermethylated |
| cg01657574 | 0.14397 | 0.373913514 | 1.376936 | 6.93E-06 | hypermethylated |
| cg13564533 | 0.10884 | 0.282672973 | 1.376925 | 1.02E-05 | hypermethylated |
| cg19884262 | 0.14723 | 0.38229027  | 1.376597 | 1.73E-05 | hypermethylated |
| cg00571033 | 0.13003 | 0.337601622 | 1.376477 | 1.28E-05 | hypermethylated |
| cg26485937 | 0.18179 | 0.471818919 | 1.37596  | 2.42E-06 | hypermethylated |
| cg20023231 | 0.10583 | 0.274471892 | 1.37491  | 5.32E-05 | hypermethylated |
| cg18791205 | 0.093   | 0.241191892 | 1.374879 | 6.93E-06 | hypermethylated |
| cg10000952 | 0.11751 | 0.304748649 | 1.374836 | 6.01E-05 | hypermethylated |
| cg19153763 | 0.10023 | 0.259796757 | 1.374069 | 4.60E-06 | hypermethylated |
| cg16391955 | 0.15341 | 0.397611892 | 1.373968 | 2.51E-05 | hypermethylated |
| cg12744722 | 0.1052  | 0.272635135 | 1.373837 | 8.13E-05 | hypermethylated |
| cg03625109 | 0.16206 | 0.419992432 | 1.373835 | 3.32E-05 | hypermethylated |
| cg11052202 | 0.14461 | 0.374690811 | 1.373533 | 4.36E-05 | hypermethylated |
| cg11125104 | 0.12241 | 0.317160541 | 1.373492 | 1.62E-05 | hypermethylated |

|            |         |             |          |          |                 |
|------------|---------|-------------|----------|----------|-----------------|
| cg13791131 | 0.138   | 0.357541622 | 1.373443 | 0.000172 | hypermethylated |
| cg18365865 | 0.14369 | 0.372215676 | 1.373179 | 9.57E-06 | hypermethylated |
| cg02165355 | 0.13745 | 0.355928649 | 1.372681 | 2.57E-05 | hypermethylated |
| cg03757784 | 0.14925 | 0.386472973 | 1.372637 | 1.50E-05 | hypermethylated |
| cg12259537 | 0.12116 | 0.31372     | 1.372564 | 1.11E-05 | hypermethylated |
| cg13066658 | 0.09985 | 0.258536216 | 1.372532 | 8.03E-05 | hypermethylated |
| cg00736523 | 0.12612 | 0.326435135 | 1.371999 | 3.12E-06 | hypermethylated |
| cg12338097 | 0.11661 | 0.301803784 | 1.371919 | 2.92E-05 | hypermethylated |
| cg18875371 | 0.13055 | 0.337755135 | 1.371375 | 3.07E-05 | hypermethylated |
| cg22685409 | 0.1287  | 0.332896757 | 1.371063 | 2.71E-05 | hypermethylated |
| cg06010032 | 0.17552 | 0.453912973 | 1.37078  | 2.51E-05 | hypermethylated |
| cg04620418 | 0.10562 | 0.273084865 | 1.370466 | 4.05E-05 | hypermethylated |
| cg15805568 | 0.10211 | 0.264005405 | 1.370443 | 7.52E-06 | hypermethylated |
| cg12304520 | 0.21909 | 0.566321622 | 1.370098 | 9.82E-06 | hypermethylated |
| cg12851526 | 0.095   | 0.245420541 | 1.369257 | 6.05E-06 | hypermethylated |
| cg17410650 | 0.12201 | 0.315182703 | 1.369189 | 2.32E-05 | hypermethylated |
| cg18115064 | 0.103   | 0.266045405 | 1.369028 | 0.000124 | hypermethylated |
| cg09147777 | 0.1344  | 0.347137297 | 1.368973 | 4.15E-05 | hypermethylated |
| cg05229355 | 0.09741 | 0.251573514 | 1.368838 | 2.71E-05 | hypermethylated |
| cg04323427 | 0.12232 | 0.315898919 | 1.368803 | 5.32E-05 | hypermethylated |
| cg23676439 | 0.10363 | 0.267604865 | 1.368663 | 0.00012  | hypermethylated |
| cg01009664 | 0.15335 | 0.395887568 | 1.368263 | 7.12E-05 | hypermethylated |
| cg07317062 | 0.18244 | 0.470957297 | 1.368174 | 1.18E-05 | hypermethylated |
| cg19814981 | 0.20962 | 0.541101622 | 1.368123 | 1.99E-06 | hypermethylated |
| cg21375294 | 0.10599 | 0.273564865 | 1.367955 | 1.58E-05 | hypermethylated |
| cg13209481 | 0.16274 | 0.419994054 | 1.3678   | 1.12E-05 | hypermethylated |
| cg14418226 | 0.12609 | 0.325302162 | 1.367327 | 0.000822 | hypermethylated |
| cg09230996 | 0.10888 | 0.280847568 | 1.367048 | 0.000109 | hypermethylated |
| cg25137711 | 0.1376  | 0.354911892 | 1.36698  | 1.92E-05 | hypermethylated |
| cg12325536 | 0.16008 | 0.412817297 | 1.36671  | 8.15E-06 | hypermethylated |
| cg09199698 | 0.0938  | 0.241884865 | 1.366661 | 1.42E-05 | hypermethylated |
| cg14547644 | 0.11343 | 0.292489189 | 1.366581 | 4.73E-06 | hypermethylated |
| cg16553435 | 0.12373 | 0.319024865 | 1.366474 | 0.000109 | hypermethylated |
| cg12164282 | 0.18051 | 0.46538973  | 1.366361 | 3.00E-05 | hypermethylated |
| cg02347074 | 0.15774 | 0.406598378 | 1.366056 | 1.06E-05 | hypermethylated |
| cg15191648 | 0.13899 | 0.358257838 | 1.366017 | 7.12E-06 | hypermethylated |
| cg11615755 | 0.12602 | 0.324754595 | 1.365697 | 2.21E-05 | hypermethylated |
| cg09698471 | 0.14962 | 0.385519459 | 1.365501 | 1.80E-05 | hypermethylated |
| cg10824063 | 0.13381 | 0.34464973  | 1.364945 | 4.36E-05 | hypermethylated |
| cg10963061 | 0.16407 | 0.422586486 | 1.364935 | 0.000435 | hypermethylated |
| cg27578811 | 0.20174 | 0.519535676 | 1.364726 | 1.54E-05 | hypermethylated |
| cg21053529 | 0.13794 | 0.355209189 | 1.364628 | 6.95E-05 | hypermethylated |
| cg03940684 | 0.13529 | 0.348223243 | 1.363957 | 5.19E-05 | hypermethylated |
| cg03712816 | 0.12051 | 0.310128108 | 1.363711 | 4.60E-06 | hypermethylated |
| cg09338032 | 0.17442 | 0.448817838 | 1.363565 | 1.11E-05 | hypermethylated |
| cg25146557 | 0.14297 | 0.367877297 | 1.363512 | 7.52E-06 | hypermethylated |
| cg00090261 | 0.15704 | 0.404078919 | 1.363505 | 4.15E-05 | hypermethylated |
| cg15339231 | 0.12886 | 0.33142     | 1.362856 | 1.04E-05 | hypermethylated |
| cg01162672 | 0.10487 | 0.269652432 | 1.362499 | 0.000137 | hypermethylated |
| cg09825093 | 0.1055  | 0.271222703 | 1.362235 | 2.64E-05 | hypermethylated |
| cg01382110 | 0.11797 | 0.303257838 | 1.362125 | 8.42E-05 | hypermethylated |
| cg16766249 | 0.12796 | 0.328904865 | 1.361977 | 0.000117 | hypermethylated |
| cg12782992 | 0.11186 | 0.287492973 | 1.361832 | 0.000148 | hypermethylated |
| cg25825506 | 0.13831 | 0.355469189 | 1.361819 | 5.32E-05 | hypermethylated |
| cg23035602 | 0.10492 | 0.269629189 | 1.361687 | 0.00012  | hypermethylated |
| cg11530960 | 0.10512 | 0.270104865 | 1.361482 | 1.15E-05 | hypermethylated |
| cg24438644 | 0.11183 | 0.287329189 | 1.361397 | 2.78E-05 | hypermethylated |
| cg12573849 | 0.13961 | 0.358650811 | 1.361178 | 7.42E-06 | hypermethylated |

|            |         |             |          |          |                 |
|------------|---------|-------------|----------|----------|-----------------|
| cg20055426 | 0.12446 | 0.319685405 | 1.360971 | 2.85E-05 | hypermethylated |
| cg21187352 | 0.1193  | 0.306371892 | 1.36069  | 1.99E-05 | hypermethylated |
| cg08688773 | 0.09976 | 0.256117297 | 1.360271 | 3.57E-05 | hypermethylated |
| cg22489321 | 0.17946 | 0.460632973 | 1.359955 | 7.42E-06 | hypermethylated |
| cg14530304 | 0.1184  | 0.303858378 | 1.35973  | 8.60E-06 | hypermethylated |
| cg19596110 | 0.15097 | 0.387399459 | 1.35956  | 1.58E-05 | hypermethylated |
| cg24747764 | 0.11653 | 0.299015135 | 1.359517 | 5.19E-05 | hypermethylated |
| cg00688962 | 0.16923 | 0.434192973 | 1.359351 | 2.51E-05 | hypermethylated |
| cg16182986 | 0.12154 | 0.311752973 | 1.358972 | 8.60E-06 | hypermethylated |
| cg08962087 | 0.09275 | 0.23785027  | 1.358634 | 3.49E-05 | hypermethylated |
| cg15107670 | 0.1398  | 0.358504865 | 1.358628 | 6.08E-05 | hypermethylated |
| cg09798888 | 0.16279 | 0.417460541 | 1.358628 | 0.000342 | hypermethylated |
| cg18007959 | 0.10924 | 0.280071892 | 1.358296 | 5.58E-05 | hypermethylated |
| cg09907509 | 0.21899 | 0.56141027  | 1.35819  | 1.08E-05 | hypermethylated |
| cg27362525 | 0.15697 | 0.402377297 | 1.35806  | 5.32E-05 | hypermethylated |
| cg23597629 | 0.15199 | 0.389557297 | 1.357859 | 7.52E-06 | hypermethylated |
| cg06973667 | 0.0939  | 0.240655676 | 1.357773 | 3.79E-06 | hypermethylated |
| cg21300373 | 0.16496 | 0.422769189 | 1.357754 | 1.28E-05 | hypermethylated |
| cg10851698 | 0.12954 | 0.331869189 | 1.357217 | 1.50E-05 | hypermethylated |
| cg25903072 | 0.08693 | 0.222689189 | 1.357105 | 2.07E-05 | hypermethylated |
| cg05842855 | 0.15059 | 0.385765946 | 1.3571   | 5.00E-06 | hypermethylated |
| cg19459876 | 0.12046 | 0.308578378 | 1.357083 | 6.23E-05 | hypermethylated |
| cg14757228 | 0.20046 | 0.513359459 | 1.356655 | 8.04E-06 | hypermethylated |
| cg19355929 | 0.11257 | 0.288278378 | 1.35664  | 3.95E-05 | hypermethylated |
| cg06987672 | 0.09673 | 0.247711351 | 1.356625 | 3.15E-05 | hypermethylated |
| cg03004999 | 0.07651 | 0.195899459 | 1.356393 | 1.28E-05 | hypermethylated |
| cg10367023 | 0.12121 | 0.31034     | 1.356341 | 1.11E-05 | hypermethylated |
| cg19078576 | 0.14788 | 0.378597838 | 1.356239 | 0.001288 | hypermethylated |
| cg07005778 | 0.15842 | 0.405555676 | 1.356146 | 7.12E-06 | hypermethylated |
| cg15165122 | 0.14479 | 0.370616757 | 1.355966 | 0.000594 | hypermethylated |
| cg13667638 | 0.13075 | 0.334634595 | 1.355776 | 8.83E-06 | hypermethylated |
| cg17777676 | 0.16862 | 0.431520541 | 1.355654 | 3.90E-06 | hypermethylated |
| cg16234978 | 0.21558 | 0.551544865 | 1.355255 | 4.82E-05 | hypermethylated |
| cg06005396 | 0.09518 | 0.243426486 | 1.354756 | 2.13E-05 | hypermethylated |
| cg18451114 | 0.1072  | 0.274161081 | 1.354719 | 0.000132 | hypermethylated |
| cg22070406 | 0.11662 | 0.298227568 | 1.354598 | 2.71E-05 | hypermethylated |
| cg26444528 | 0.17813 | 0.455507568 | 1.354545 | 1.18E-05 | hypermethylated |
| cg08840847 | 0.10626 | 0.27172     | 1.354522 | 3.08E-06 | hypermethylated |
| cg15810758 | 0.10942 | 0.279735135 | 1.354185 | 0.000224 | hypermethylated |
| cg06335867 | 0.21518 | 0.550029189 | 1.353964 | 4.80E-06 | hypermethylated |
| cg01567634 | 0.11731 | 0.299838919 | 1.353862 | 1.80E-05 | hypermethylated |
| cg02630214 | 0.18971 | 0.484816216 | 1.353642 | 1.46E-05 | hypermethylated |
| cg06946708 | 0.14621 | 0.373598919 | 1.353448 | 7.12E-06 | hypermethylated |
| cg04273811 | 0.13704 | 0.350164865 | 1.353437 | 0.000117 | hypermethylated |
| cg03997176 | 0.10948 | 0.27974     | 1.353419 | 0.000361 | hypermethylated |
| cg24304919 | 0.12124 | 0.309758919 | 1.35328  | 4.15E-05 | hypermethylated |
| cg15638055 | 0.10581 | 0.270332973 | 1.353262 | 2.15E-05 | hypermethylated |
| cg20640433 | 0.14273 | 0.364648649 | 1.353218 | 0.000245 | hypermethylated |
| cg00605982 | 0.10972 | 0.280310811 | 1.353201 | 3.95E-05 | hypermethylated |
| cg19803052 | 0.17364 | 0.443528649 | 1.352928 | 2.10E-06 | hypermethylated |
| cg22562942 | 0.16534 | 0.422327027 | 1.352925 | 1.18E-05 | hypermethylated |
| cg07964848 | 0.1587  | 0.405342703 | 1.35284  | 6.84E-06 | hypermethylated |
| cg21907579 | 0.13364 | 0.341315676 | 1.352755 | 3.76E-05 | hypermethylated |
| cg02438781 | 0.16763 | 0.428124865 | 1.352751 | 1.25E-05 | hypermethylated |
| cg16564033 | 0.13804 | 0.352490811 | 1.352499 | 0.000115 | hypermethylated |
| cg03909500 | 0.10625 | 0.27128973  | 1.352372 | 1.71E-05 | hypermethylated |
| cg04897683 | 0.13753 | 0.351143784 | 1.352316 | 2.10E-05 | hypermethylated |
| cg16562275 | 0.14406 | 0.367809189 | 1.352288 | 2.92E-05 | hypermethylated |

|            |         |             |          |          |                 |
|------------|---------|-------------|----------|----------|-----------------|
| cg17180678 | 0.11515 | 0.293971351 | 1.352161 | 0.000224 | hypermethylated |
| cg15377518 | 0.1469  | 0.375016757 | 1.352121 | 0.0002   | hypermethylated |
| cg07903370 | 0.11097 | 0.283262162 | 1.351968 | 2.23E-06 | hypermethylated |
| cg26675654 | 0.17539 | 0.447652432 | 1.351813 | 9.07E-06 | hypermethylated |
| cg19947104 | 0.14818 | 0.378198919 | 1.351795 | 0.000115 | hypermethylated |
| cg25362630 | 0.12209 | 0.311550811 | 1.351522 | 2.64E-05 | hypermethylated |
| cg05900347 | 0.08702 | 0.22204     | 1.351401 | 3.08E-06 | hypermethylated |
| cg21711132 | 0.16199 | 0.413327027 | 1.351379 | 6.93E-06 | hypermethylated |
| cg11764900 | 0.13695 | 0.349419459 | 1.351311 | 5.32E-05 | hypermethylated |
| cg18447790 | 0.09418 | 0.240237838 | 1.350971 | 2.85E-05 | hypermethylated |
| cg00030508 | 0.12894 | 0.328815676 | 1.350579 | 3.08E-06 | hypermethylated |
| cg01345315 | 0.14743 | 0.375925946 | 1.350418 | 7.32E-06 | hypermethylated |
| cg18221021 | 0.1069  | 0.272512973 | 1.350063 | 4.36E-05 | hypermethylated |
| cg01718447 | 0.14852 | 0.378552432 | 1.349836 | 0.000822 | hypermethylated |
| cg19497501 | 0.11494 | 0.292945405 | 1.349751 | 3.57E-05 | hypermethylated |
| cg13674174 | 0.10603 | 0.270208108 | 1.349598 | 7.52E-06 | hypermethylated |
| cg11301556 | 0.1181  | 0.300809189 | 1.34884  | 1.04E-05 | hypermethylated |
| cg05812269 | 0.09934 | 0.253005405 | 1.348722 | 1.02E-06 | hypermethylated |
| cg08044097 | 0.16567 | 0.421824865 | 1.348332 | 1.21E-05 | hypermethylated |
| cg25830182 | 0.16925 | 0.430908108 | 1.348224 | 0.000117 | hypermethylated |
| cg22950163 | 0.10723 | 0.272908108 | 1.347707 | 1.25E-05 | hypermethylated |
| cg03840594 | 0.14286 | 0.363584324 | 1.347688 | 3.59E-06 | hypermethylated |
| cg09834794 | 0.16558 | 0.421251892 | 1.347155 | 2.13E-05 | hypermethylated |
| cg00312921 | 0.12993 | 0.330485405 | 1.346852 | 1.54E-05 | hypermethylated |
| cg17011276 | 0.1349  | 0.343114595 | 1.3468   | 1.87E-05 | hypermethylated |
| cg27405791 | 0.12749 | 0.324047027 | 1.345819 | 5.38E-05 | hypermethylated |
| cg16113681 | 0.13134 | 0.333723784 | 1.345348 | 0.000417 | hypermethylated |
| cg19827780 | 0.10801 | 0.274415135 | 1.345195 | 0.001751 | hypermethylated |
| cg07489048 | 0.21119 | 0.536243784 | 1.344347 | 1.41E-06 | hypermethylated |
| cg02409815 | 0.12321 | 0.312827027 | 1.344246 | 1.71E-05 | hypermethylated |
| cg01442601 | 0.14754 | 0.374541081 | 1.344018 | 4.05E-05 | hypermethylated |
| cg22418909 | 0.14444 | 0.366657838 | 1.343964 | 1.31E-05 | hypermethylated |
| cg23284720 | 0.12445 | 0.31588     | 1.34381  | 2.36E-06 | hypermethylated |
| cg06635832 | 0.13076 | 0.331850811 | 1.343614 | 1.58E-05 | hypermethylated |
| cg06672560 | 0.1291  | 0.327627568 | 1.343568 | 2.32E-05 | hypermethylated |
| cg20661138 | 0.19052 | 0.48347027  | 1.343485 | 2.27E-05 | hypermethylated |
| cg19822343 | 0.13343 | 0.338551892 | 1.343294 | 1.18E-05 | hypermethylated |
| cg25839023 | 0.09541 | 0.24202973  | 1.342972 | 3.07E-05 | hypermethylated |
| cg21016855 | 0.12837 | 0.325568108 | 1.342651 | 8.84E-05 | hypermethylated |
| cg18836626 | 0.15334 | 0.388814595 | 1.342348 | 2.78E-05 | hypermethylated |
| cg18309817 | 0.11953 | 0.303081622 | 1.342334 | 8.83E-06 | hypermethylated |
| cg24196693 | 0.1421  | 0.360303243 | 1.342305 | 2.85E-05 | hypermethylated |
| cg25399352 | 0.14124 | 0.358017838 | 1.341883 | 6.95E-05 | hypermethylated |
| cg10345920 | 0.09596 | 0.243164865 | 1.34143  | 4.26E-05 | hypermethylated |
| cg12377139 | 0.18135 | 0.459531351 | 1.341387 | 8.26E-06 | hypermethylated |
| cg15727287 | 0.14324 | 0.362875676 | 1.341041 | 0.000232 | hypermethylated |
| cg19064258 | 0.15258 | 0.38652973  | 1.341014 | 1.71E-05 | hypermethylated |
| cg05956679 | 0.11036 | 0.279529189 | 1.340782 | 0.000142 | hypermethylated |
| cg14968543 | 0.12141 | 0.307505405 | 1.340725 | 2.10E-05 | hypermethylated |
| cg25033990 | 0.14048 | 0.355765405 | 1.340561 | 8.60E-06 | hypermethylated |
| cg02367144 | 0.12363 | 0.313068108 | 1.340448 | 3.07E-05 | hypermethylated |
| cg17295225 | 0.13621 | 0.344863784 | 1.340194 | 3.26E-06 | hypermethylated |
| cg00842299 | 0.09569 | 0.24227027  | 1.340177 | 1.71E-05 | hypermethylated |
| cg01309744 | 0.12627 | 0.31968     | 1.340117 | 3.95E-05 | hypermethylated |
| cg04548856 | 0.13726 | 0.347489189 | 1.340057 | 3.95E-05 | hypermethylated |
| cg16379885 | 0.09618 | 0.243469189 | 1.33993  | 4.47E-05 | hypermethylated |
| cg04282694 | 0.12481 | 0.31592     | 1.339826 | 2.45E-05 | hypermethylated |
| cg02990291 | 0.1256  | 0.317885405 | 1.33967  | 3.15E-05 | hypermethylated |



|            |         |             |          |          |                 |
|------------|---------|-------------|----------|----------|-----------------|
| cg08857994 | 0.19119 | 0.483860541 | 1.339584 | 1.82E-06 | hypermethylated |
| cg11213369 | 0.17268 | 0.436987027 | 1.339489 | 9.82E-06 | hypermethylated |
| cg18781988 | 0.1631  | 0.412725946 | 1.339427 | 4.70E-05 | hypermethylated |
| cg05036656 | 0.18964 | 0.479874595 | 1.339394 | 1.51E-06 | hypermethylated |
| cg00073543 | 0.0995  | 0.251758919 | 1.339274 | 3.85E-05 | hypermethylated |
| cg26444951 | 0.13894 | 0.351534054 | 1.339202 | 8.84E-05 | hypermethylated |
| cg14457782 | 0.16166 | 0.408981081 | 1.339071 | 8.22E-05 | hypermethylated |
| cg08526991 | 0.2116  | 0.535275676 | 1.338942 | 9.66E-07 | hypermethylated |
| cg08141424 | 0.10714 | 0.270978378 | 1.338681 | 0.000191 | hypermethylated |
| cg11220663 | 0.16004 | 0.404756757 | 1.338623 | 1.80E-05 | hypermethylated |
| cg10176110 | 0.16114 | 0.407509189 | 1.338518 | 9.72E-05 | hypermethylated |
| cg13927566 | 0.13506 | 0.341525946 | 1.338395 | 1.72E-06 | hypermethylated |
| cg27122536 | 0.13466 | 0.340457297 | 1.338152 | 2.21E-05 | hypermethylated |
| cg12213062 | 0.18139 | 0.458565405 | 1.338033 | 2.45E-05 | hypermethylated |
| cg07990736 | 0.10319 | 0.26082973  | 1.337805 | 1.66E-05 | hypermethylated |
| cg24156796 | 0.10578 | 0.267372973 | 1.337787 | 7.32E-06 | hypermethylated |
| cg05996052 | 0.13137 | 0.332045405 | 1.337745 | 2.71E-05 | hypermethylated |
| cg19759671 | 0.17453 | 0.440998378 | 1.337298 | 1.89E-05 | hypermethylated |
| cg02773086 | 0.16347 | 0.413032432 | 1.337229 | 4.94E-05 | hypermethylated |
| cg21187554 | 0.10629 | 0.268557297 | 1.337224 | 2.85E-05 | hypermethylated |
| cg04891086 | 0.12647 | 0.319534595 | 1.337177 | 0.000296 | hypermethylated |
| cg23842170 | 0.14062 | 0.355205405 | 1.336852 | 2.39E-05 | hypermethylated |
| cg25733708 | 0.10513 | 0.265538919 | 1.336749 | 0.000435 | hypermethylated |
| cg15540820 | 0.14443 | 0.364777297 | 1.336646 | 9.82E-06 | hypermethylated |
| cg27315191 | 0.10321 | 0.260630811 | 1.336425 | 7.72E-06 | hypermethylated |
| cg18497508 | 0.11858 | 0.299377297 | 1.336104 | 0.000234 | hypermethylated |
| cg19403014 | 0.13608 | 0.343511351 | 1.335903 | 0.000159 | hypermethylated |
| cg22374057 | 0.16061 | 0.40539027  | 1.33575  | 4.24E-06 | hypermethylated |
| cg11566394 | 0.18978 | 0.478743784 | 1.334926 | 3.76E-05 | hypermethylated |
| cg24513224 | 0.12006 | 0.302802162 | 1.33462  | 8.37E-06 | hypermethylated |
| cg24041917 | 0.11269 | 0.284207568 | 1.334585 | 9.19E-06 | hypermethylated |
| cg04900080 | 0.13349 | 0.336594054 | 1.334278 | 4.05E-05 | hypermethylated |
| cg02621287 | 0.22543 | 0.568403784 | 1.334237 | 3.95E-05 | hypermethylated |
| cg13073186 | 0.10673 | 0.269095135 | 1.334151 | 5.43E-06 | hypermethylated |
| cg06951245 | 0.11299 | 0.284877297 | 1.334146 | 0.000303 | hypermethylated |
| cg19030607 | 0.11017 | 0.277750811 | 1.33406  | 3.30E-06 | hypermethylated |
| cg08390877 | 0.14413 | 0.363356757 | 1.334016 | 9.82E-06 | hypermethylated |
| cg07442409 | 0.11279 | 0.284294595 | 1.333748 | 6.57E-06 | hypermethylated |
| cg02081006 | 0.23128 | 0.58294     | 1.333707 | 6.66E-06 | hypermethylated |
| cg02739346 | 0.15604 | 0.393101622 | 1.332986 | 2.23E-06 | hypermethylated |
| cg18279094 | 0.2301  | 0.579628108 | 1.332867 | 2.64E-06 | hypermethylated |
| cg17473600 | 0.09973 | 0.251215135 | 1.332824 | 2.02E-06 | hypermethylated |
| cg14659193 | 0.13717 | 0.34536973  | 1.332177 | 8.83E-06 | hypermethylated |
| cg01610231 | 0.13538 | 0.340808108 | 1.331945 | 1.62E-05 | hypermethylated |
| cg02712224 | 0.11703 | 0.294599459 | 1.331876 | 1.94E-05 | hypermethylated |
| cg18653451 | 0.13062 | 0.328782162 | 1.331756 | 3.32E-05 | hypermethylated |
| cg03111498 | 0.12176 | 0.30639027  | 1.33133  | 5.72E-05 | hypermethylated |
| cg22974236 | 0.14502 | 0.364862162 | 1.3311   | 2.15E-05 | hypermethylated |
| cg03694713 | 0.15291 | 0.384707027 | 1.331077 | 7.12E-05 | hypermethylated |
| cg03355524 | 0.15275 | 0.384224324 | 1.330776 | 7.65E-05 | hypermethylated |
| cg15448975 | 0.16609 | 0.417736757 | 1.330629 | 7.52E-06 | hypermethylated |
| cg06482428 | 0.15292 | 0.384589189 | 1.330541 | 2.04E-05 | hypermethylated |
| cg19656282 | 0.14983 | 0.376771351 | 1.330363 | 9.27E-05 | hypermethylated |
| cg12215340 | 0.11576 | 0.291084865 | 1.330303 | 0.000187 | hypermethylated |
| cg10476112 | 0.12094 | 0.304107027 | 1.330288 | 0.0003   | hypermethylated |
| cg12506930 | 0.17133 | 0.430798919 | 1.330237 | 5.45E-05 | hypermethylated |
| cg14621053 | 0.15373 | 0.38651027  | 1.330108 | 2.02E-06 | hypermethylated |
| cg16123202 | 0.18388 | 0.462197297 | 1.329744 | 1.25E-05 | hypermethylated |

|            |         |             |          |          |                 |
|------------|---------|-------------|----------|----------|-----------------|
| cg14909464 | 0.09015 | 0.22654973  | 1.329428 | 2.71E-06 | hypermethylated |
| cg10354244 | 0.13056 | 0.328084865 | 1.329356 | 1.84E-05 | hypermethylated |
| cg22203219 | 0.14475 | 0.363688108 | 1.329138 | 1.99E-05 | hypermethylated |
| cg10722226 | 0.12591 | 0.316304324 | 1.32892  | 5.45E-05 | hypermethylated |
| cg10269365 | 0.16735 | 0.420400541 | 1.328896 | 8.48E-06 | hypermethylated |
| cg25684640 | 0.10891 | 0.273575135 | 1.328801 | 3.53E-05 | hypermethylated |
| cg25486757 | 0.1126  | 0.282828649 | 1.328721 | 0.000229 | hypermethylated |
| cg20475322 | 0.16934 | 0.425286486 | 1.328512 | 8.03E-05 | hypermethylated |
| cg07376535 | 0.12768 | 0.320656216 | 1.328495 | 9.07E-06 | hypermethylated |
| cg22875872 | 0.14285 | 0.358745405 | 1.328459 | 0.000607 | hypermethylated |
| cg07212852 | 0.12925 | 0.324488108 | 1.328001 | 7.74E-05 | hypermethylated |
| cg08553284 | 0.1218  | 0.305747027 | 1.327824 | 9.05E-05 | hypermethylated |
| cg18255166 | 0.12624 | 0.316847027 | 1.327617 | 0.000296 | hypermethylated |
| cg09703679 | 0.16182 | 0.406124865 | 1.327533 | 4.73E-06 | hypermethylated |
| cg01718322 | 0.15    | 0.376443243 | 1.32747  | 0.000259 | hypermethylated |
| cg17023770 | 0.1469  | 0.368611892 | 1.327268 | 2.10E-05 | hypermethylated |
| cg20959866 | 0.14283 | 0.358394595 | 1.32725  | 2.57E-06 | hypermethylated |
| cg13891768 | 0.18369 | 0.460839459 | 1.326991 | 1.48E-05 | hypermethylated |
| cg00446413 | 0.1709  | 0.428705946 | 1.326836 | 1.89E-05 | hypermethylated |
| cg05677041 | 0.11337 | 0.284372432 | 1.326743 | 8.94E-05 | hypermethylated |
| cg05091238 | 0.15639 | 0.392256757 | 1.32665  | 3.40E-05 | hypermethylated |
| cg25094569 | 0.13647 | 0.342275676 | 1.326575 | 0.000126 | hypermethylated |
| cg04178316 | 0.12695 | 0.318384324 | 1.326509 | 4.42E-06 | hypermethylated |
| cg15634980 | 0.11912 | 0.298740541 | 1.326477 | 0.000306 | hypermethylated |
| cg18022224 | 0.09996 | 0.250683784 | 1.326446 | 9.07E-06 | hypermethylated |
| cg14844194 | 0.14078 | 0.353048649 | 1.326425 | 1.92E-05 | hypermethylated |
| cg03506489 | 0.12129 | 0.304168649 | 1.326411 | 2.35E-05 | hypermethylated |
| cg24945701 | 0.17092 | 0.428491892 | 1.325947 | 3.12E-06 | hypermethylated |
| cg19370653 | 0.11644 | 0.291877838 | 1.325778 | 2.74E-05 | hypermethylated |
| cg25651783 | 0.12432 | 0.311442703 | 1.324908 | 2.39E-05 | hypermethylated |
| cg26666835 | 0.15064 | 0.377316757 | 1.324671 | 3.04E-06 | hypermethylated |
| cg10242602 | 0.19551 | 0.489407027 | 1.323792 | 1.21E-05 | hypermethylated |
| cg25339054 | 0.22622 | 0.566277838 | 1.323784 | 8.60E-06 | hypermethylated |
| cg10175795 | 0.14768 | 0.369637297 | 1.323636 | 1.18E-05 | hypermethylated |
| cg01414185 | 0.15675 | 0.392270811 | 1.323385 | 0.000112 | hypermethylated |
| cg01024444 | 0.19303 | 0.482978919 | 1.323135 | 6.01E-05 | hypermethylated |
| cg00957516 | 0.13419 | 0.335745946 | 1.323093 | 1.66E-05 | hypermethylated |
| cg10214421 | 0.13074 | 0.327047568 | 1.3228   | 3.90E-05 | hypermethylated |
| cg22873539 | 0.11926 | 0.298232432 | 1.322327 | 3.40E-05 | hypermethylated |
| cg08581953 | 0.13502 | 0.337642162 | 1.322322 | 6.93E-06 | hypermethylated |
| cg12110911 | 0.12231 | 0.305774595 | 1.321926 | 8.60E-06 | hypermethylated |
| cg22426570 | 0.10927 | 0.273148108 | 1.321786 | 0.000166 | hypermethylated |
| cg19509330 | 0.1105  | 0.276082162 | 1.321051 | 1.62E-05 | hypermethylated |
| cg03356900 | 0.12576 | 0.314203243 | 1.321025 | 6.62E-05 | hypermethylated |
| cg16041686 | 0.1179  | 0.294547568 | 1.320937 | 7.52E-06 | hypermethylated |
| cg09854003 | 0.15183 | 0.379249189 | 1.320689 | 2.95E-06 | hypermethylated |
| cg20429172 | 0.16579 | 0.414102703 | 1.320632 | 9.31E-06 | hypermethylated |
| cg21451110 | 0.10982 | 0.274277297 | 1.320494 | 8.84E-05 | hypermethylated |
| cg06659727 | 0.15233 | 0.380421081 | 1.320397 | 4.58E-05 | hypermethylated |
| cg10709593 | 0.13394 | 0.334465946 | 1.320272 | 5.21E-06 | hypermethylated |
| cg20156659 | 0.15042 | 0.375593514 | 1.320176 | 4.36E-05 | hypermethylated |
| cg23638252 | 0.12026 | 0.300260541 | 1.320058 | 3.12E-06 | hypermethylated |
| cg20575761 | 0.19118 | 0.477228108 | 1.319747 | 3.59E-06 | hypermethylated |
| cg22762091 | 0.17842 | 0.445358919 | 1.319691 | 9.57E-06 | hypermethylated |
| cg00192136 | 0.12754 | 0.318244324 | 1.319185 | 0.000165 | hypermethylated |
| cg15929698 | 0.14563 | 0.363368108 | 1.319124 | 7.29E-05 | hypermethylated |
| cg06110297 | 0.14966 | 0.373405405 | 1.319054 | 1.08E-05 | hypermethylated |
| cg16939364 | 0.14358 | 0.358227027 | 1.319019 | 1.42E-05 | hypermethylated |

|            |         |             |          |          |                 |
|------------|---------|-------------|----------|----------|-----------------|
| cg11241627 | 0.12085 | 0.301479459 | 1.318842 | 6.23E-05 | hypermethylated |
| cg15461335 | 0.10383 | 0.259010811 | 1.318789 | 0.000117 | hypermethylated |
| cg22571664 | 0.16555 | 0.412851351 | 1.318355 | 7.12E-06 | hypermethylated |
| cg00272971 | 0.14552 | 0.362882162 | 1.318284 | 2.32E-05 | hypermethylated |
| cg02000318 | 0.12421 | 0.309716216 | 1.318166 | 4.10E-05 | hypermethylated |
| cg20132590 | 0.14396 | 0.358854054 | 1.317729 | 1.54E-05 | hypermethylated |
| cg03671700 | 0.11517 | 0.287083784 | 1.317707 | 9.05E-05 | hypermethylated |
| cg03631561 | 0.13887 | 0.346158378 | 1.317697 | 6.31E-05 | hypermethylated |
| cg10647513 | 0.10665 | 0.265824324 | 1.317589 | 0.000237 | hypermethylated |
| cg23400446 | 0.12819 | 0.319423784 | 1.317188 | 0.001074 | hypermethylated |
| cg08736638 | 0.12989 | 0.323542703 | 1.316666 | 9.60E-05 | hypermethylated |
| cg02970384 | 0.12684 | 0.315772432 | 1.315875 | 2.95E-06 | hypermethylated |
| cg02582957 | 0.1333  | 0.331834054 | 1.315785 | 5.00E-06 | hypermethylated |
| cg16080876 | 0.11995 | 0.298554054 | 1.315559 | 1.66E-05 | hypermethylated |
| cg26517171 | 0.10088 | 0.251081081 | 1.315513 | 4.24E-06 | hypermethylated |
| cg15028514 | 0.11827 | 0.294355135 | 1.315474 | 8.63E-05 | hypermethylated |
| cg25818402 | 0.12383 | 0.308168649 | 1.315359 | 1.28E-05 | hypermethylated |
| cg11308643 | 0.1739  | 0.432709189 | 1.31514  | 1.89E-05 | hypermethylated |
| cg01787574 | 0.14537 | 0.361660541 | 1.314907 | 7.62E-06 | hypermethylated |
| cg26084511 | 0.1137  | 0.282808108 | 1.314591 | 1.68E-05 | hypermethylated |
| cg08351336 | 0.11219 | 0.279044865 | 1.314553 | 0.000104 | hypermethylated |
| cg13411015 | 0.09706 | 0.241398919 | 1.31447  | 5.06E-05 | hypermethylated |
| cg13462129 | 0.17855 | 0.444065946 | 1.314446 | 1.04E-05 | hypermethylated |
| cg03706436 | 0.12231 | 0.304188649 | 1.314424 | 5.12E-05 | hypermethylated |
| cg02781618 | 0.15305 | 0.380560541 | 1.314123 | 9.31E-06 | hypermethylated |
| cg06622528 | 0.08787 | 0.218483784 | 1.314084 | 4.70E-05 | hypermethylated |
| cg02860602 | 0.16254 | 0.403978919 | 1.313485 | 3.49E-05 | hypermethylated |
| cg02127215 | 0.1397  | 0.347159459 | 1.313266 | 1.04E-05 | hypermethylated |
| cg10649903 | 0.1913  | 0.475165405 | 1.312593 | 2.10E-06 | hypermethylated |
| cg11480800 | 0.13746 | 0.341407568 | 1.312483 | 0.000193 | hypermethylated |
| cg04560225 | 0.1817  | 0.451256216 | 1.312388 | 5.14E-06 | hypermethylated |
| cg07428136 | 0.16394 | 0.407145405 | 1.312376 | 1.66E-05 | hypermethylated |
| cg07990546 | 0.16172 | 0.401592973 | 1.312236 | 8.63E-05 | hypermethylated |
| cg17694795 | 0.15202 | 0.377453514 | 1.312038 | 3.85E-05 | hypermethylated |
| cg17632372 | 0.12358 | 0.306785405 | 1.311785 | 8.73E-05 | hypermethylated |
| cg17299899 | 0.15785 | 0.391814595 | 1.311617 | 2.79E-06 | hypermethylated |
| cg18082638 | 0.15008 | 0.372457838 | 1.311345 | 5.28E-06 | hypermethylated |
| cg00847277 | 0.13208 | 0.327756757 | 1.311213 | 2.92E-05 | hypermethylated |
| cg23893898 | 0.1707  | 0.423538378 | 1.31103  | 1.04E-05 | hypermethylated |
| cg07033624 | 0.1337  | 0.331718919 | 1.310962 | 1.84E-05 | hypermethylated |
| cg04670857 | 0.15521 | 0.384992432 | 1.310609 | 9.72E-05 | hypermethylated |
| cg06187770 | 0.15027 | 0.372732973 | 1.310585 | 0.000111 | hypermethylated |
| cg10982364 | 0.1573  | 0.390133514 | 1.310449 | 9.27E-05 | hypermethylated |
| cg25482900 | 0.14631 | 0.362818919 | 1.310221 | 9.27E-05 | hypermethylated |
| cg01969701 | 0.25799 | 0.639610811 | 1.309879 | 7.32E-06 | hypermethylated |
| cg13652336 | 0.13173 | 0.326464324 | 1.309341 | 0.000374 | hypermethylated |
| cg12286573 | 0.10664 | 0.264247027 | 1.309139 | 5.58E-05 | hypermethylated |
| cg14950072 | 0.15325 | 0.379736216 | 1.309111 | 4.82E-05 | hypermethylated |
| cg19858749 | 0.10368 | 0.256863784 | 1.308866 | 2.78E-05 | hypermethylated |
| cg00500705 | 0.11883 | 0.294396757 | 1.308863 | 8.83E-06 | hypermethylated |
| cg22983282 | 0.13274 | 0.328746486 | 1.308372 | 0.000256 | hypermethylated |
| cg01093363 | 0.12992 | 0.321745946 | 1.308298 | 1.01E-06 | hypermethylated |
| cg14290904 | 0.13951 | 0.345471351 | 1.308198 | 1.50E-05 | hypermethylated |
| cg10721149 | 0.14124 | 0.349672432 | 1.307855 | 0.000182 | hypermethylated |
| cg23034757 | 0.1593  | 0.394255676 | 1.307385 | 7.93E-06 | hypermethylated |
| cg01342746 | 0.12278 | 0.30384973  | 1.307282 | 4.05E-05 | hypermethylated |
| cg17471467 | 0.09094 | 0.225048649 | 1.30725  | 1.73E-05 | hypermethylated |
| cg01610605 | 0.14792 | 0.366004865 | 1.307046 | 1.35E-05 | hypermethylated |

|            |         |             |          |          |                 |
|------------|---------|-------------|----------|----------|-----------------|
| cg09659227 | 0.12255 | 0.303205946 | 1.306928 | 6.05E-06 | hypermethylated |
| cg22799141 | 0.14733 | 0.364494595 | 1.306846 | 0.00017  | hypermethylated |
| cg07858908 | 0.15087 | 0.37324     | 1.306798 | 2.45E-05 | hypermethylated |
| cg14015441 | 0.17383 | 0.42995027  | 1.306493 | 9.57E-06 | hypermethylated |
| cg08287265 | 0.15524 | 0.383961081 | 1.30646  | 0.001052 | hypermethylated |
| cg11475550 | 0.1218  | 0.301230811 | 1.306355 | 8.42E-05 | hypermethylated |
| cg01301138 | 0.08428 | 0.20843027  | 1.306303 | 1.21E-05 | hypermethylated |
| cg21854408 | 0.1149  | 0.284149189 | 1.30627  | 0.001188 | hypermethylated |
| cg00043788 | 0.12059 | 0.298217297 | 1.306254 | 0.000129 | hypermethylated |
| cg00333226 | 0.15485 | 0.382842703 | 1.30588  | 7.32E-06 | hypermethylated |
| cg13246235 | 0.19524 | 0.482692432 | 1.305856 | 3.23E-05 | hypermethylated |
| cg23895340 | 0.13345 | 0.329875135 | 1.305621 | 0.000104 | hypermethylated |
| cg10904109 | 0.15886 | 0.392613514 | 1.305354 | 9.82E-06 | hypermethylated |
| cg03075534 | 0.1427  | 0.352661081 | 1.305297 | 0.000626 | hypermethylated |
| cg07871202 | 0.12063 | 0.29806973  | 1.305061 | 6.30E-06 | hypermethylated |
| cg25201047 | 0.1714  | 0.423425946 | 1.304743 | 8.22E-05 | hypermethylated |
| cg24676817 | 0.18294 | 0.451925405 | 1.304714 | 0.000426 | hypermethylated |
| cg06838985 | 0.135   | 0.333446486 | 1.304496 | 2.10E-05 | hypermethylated |
| cg05139788 | 0.18047 | 0.445678378 | 1.304244 | 7.52E-06 | hypermethylated |
| cg25062778 | 0.1233  | 0.304475135 | 1.304152 | 1.25E-05 | hypermethylated |
| cg22828989 | 0.11884 | 0.293248108 | 1.303101 | 2.75E-06 | hypermethylated |
| cg12690369 | 0.13451 | 0.331866486 | 1.30289  | 0.000123 | hypermethylated |
| cg23625660 | 0.16439 | 0.405574595 | 1.302845 | 1.37E-06 | hypermethylated |
| cg27272235 | 0.16198 | 0.399558378 | 1.302591 | 9.31E-06 | hypermethylated |
| cg02091109 | 0.1369  | 0.337680541 | 1.302537 | 3.49E-05 | hypermethylated |
| cg07068674 | 0.1608  | 0.396582162 | 1.302352 | 1.04E-05 | hypermethylated |
| cg14871601 | 0.12018 | 0.296358919 | 1.302149 | 6.01E-05 | hypermethylated |
| cg14156751 | 0.21282 | 0.524771892 | 1.302057 | 1.63E-06 | hypermethylated |
| cg11254700 | 0.22237 | 0.548254054 | 1.301882 | 6.38E-05 | hypermethylated |
| cg20605061 | 0.13319 | 0.328354595 | 1.301769 | 6.01E-05 | hypermethylated |
| cg09413950 | 0.16042 | 0.39542973  | 1.301567 | 5.06E-05 | hypermethylated |
| cg26003934 | 0.15567 | 0.383682162 | 1.301421 | 2.71E-05 | hypermethylated |
| cg18953784 | 0.12497 | 0.308001081 | 1.301354 | 0.000234 | hypermethylated |
| cg11473001 | 0.1522  | 0.375096216 | 1.301292 | 1.42E-05 | hypermethylated |
| cg12214908 | 0.13817 | 0.34043027  | 1.300915 | 1.21E-05 | hypermethylated |
| cg06717565 | 0.13531 | 0.333347568 | 1.300759 | 1.06E-05 | hypermethylated |
| cg00933210 | 0.08442 | 0.207951892 | 1.300593 | 8.22E-05 | hypermethylated |
| cg22677715 | 0.15632 | 0.385002162 | 1.300364 | 1.43E-06 | hypermethylated |
| cg11367354 | 0.16522 | 0.406855135 | 1.300127 | 2.87E-06 | hypermethylated |
| cg09567439 | 0.15992 | 0.393793514 | 1.300089 | 9.27E-05 | hypermethylated |
| cg04200224 | 0.10833 | 0.266746486 | 1.300036 | 0.000403 | hypermethylated |
| cg27142536 | 0.17382 | 0.428004324 | 1.300031 | 1.39E-05 | hypermethylated |
| cg03313945 | 0.15951 | 0.392658378 | 1.299628 | 0.000588 | hypermethylated |
| cg27288226 | 0.22674 | 0.558105405 | 1.299499 | 9.07E-06 | hypermethylated |
| cg19851909 | 0.12415 | 0.305563784 | 1.299389 | 0.000229 | hypermethylated |
| cg06086731 | 0.14212 | 0.349746486 | 1.2992   | 4.15E-05 | hypermethylated |
| cg09422450 | 0.21339 | 0.52513027  | 1.299183 | 7.03E-06 | hypermethylated |
| cg13023623 | 0.22581 | 0.555693514 | 1.29918  | 3.26E-06 | hypermethylated |
| cg10571987 | 0.14622 | 0.359747568 | 1.298844 | 7.93E-05 | hypermethylated |
| cg11228052 | 0.14099 | 0.346834595 | 1.298655 | 8.42E-05 | hypermethylated |
| cg09885735 | 0.1494  | 0.367521081 | 1.298647 | 1.64E-05 | hypermethylated |
| cg26844246 | 0.18893 | 0.4647      | 1.298448 | 1.09E-06 | hypermethylated |
| cg05353133 | 0.14144 | 0.347849189 | 1.298272 | 2.79E-06 | hypermethylated |
| cg01566235 | 0.12811 | 0.315034595 | 1.298127 | 1.99E-05 | hypermethylated |
| cg19841369 | 0.18889 | 0.464470811 | 1.298042 | 1.09E-05 | hypermethylated |
| cg22319784 | 0.15043 | 0.369880541 | 1.297967 | 0.000155 | hypermethylated |
| cg01150683 | 0.17359 | 0.426723243 | 1.297617 | 1.46E-05 | hypermethylated |
| cg21231400 | 0.15191 | 0.373403243 | 1.297518 | 1.42E-05 | hypermethylated |

|            |         |             |          |          |                 |
|------------|---------|-------------|----------|----------|-----------------|
| cg04145134 | 0.14746 | 0.362374054 | 1.297156 | 2.57E-05 | hypermethylated |
| cg14370314 | 0.14258 | 0.350355676 | 1.297049 | 0.0006   | hypermethylated |
| cg19678828 | 0.16449 | 0.404081081 | 1.296645 | 1.01E-06 | hypermethylated |
| cg23746497 | 0.22634 | 0.555973514 | 1.296525 | 5.73E-06 | hypermethylated |
| cg08448812 | 0.18392 | 0.451762703 | 1.296487 | 1.99E-06 | hypermethylated |
| cg17453460 | 0.15877 | 0.389861622 | 1.296024 | 4.26E-05 | hypermethylated |
| cg23091758 | 0.13313 | 0.326835676 | 1.29573  | 0.001452 | hypermethylated |
| cg01859340 | 0.10433 | 0.256117297 | 1.295651 | 5.65E-05 | hypermethylated |
| cg02273398 | 0.14512 | 0.356233514 | 1.295577 | 5.97E-06 | hypermethylated |
| cg02124383 | 0.14136 | 0.346994054 | 1.295537 | 3.27E-05 | hypermethylated |
| cg01202666 | 0.13412 | 0.329165405 | 1.295288 | 1.93E-06 | hypermethylated |
| cg03319497 | 0.13574 | 0.333098378 | 1.295102 | 3.35E-06 | hypermethylated |
| cg04694812 | 0.12078 | 0.296348649 | 1.294914 | 1.99E-05 | hypermethylated |
| cg21399832 | 0.1946  | 0.477444324 | 1.294821 | 2.39E-05 | hypermethylated |
| cg19443075 | 0.13684 | 0.335702703 | 1.294694 | 0.000154 | hypermethylated |
| cg24074033 | 0.18975 | 0.465294595 | 1.294045 | 1.30E-05 | hypermethylated |
| cg07695835 | 0.1452  | 0.356015135 | 1.293897 | 0.00024  | hypermethylated |
| cg08934785 | 0.18025 | 0.441944865 | 1.293867 | 4.12E-06 | hypermethylated |
| cg03205252 | 0.13485 | 0.330596757 | 1.293717 | 1.39E-05 | hypermethylated |
| cg05221167 | 0.14429 | 0.353684324 | 1.293491 | 4.15E-05 | hypermethylated |
| cg03478199 | 0.12636 | 0.309654595 | 1.29312  | 0.000155 | hypermethylated |
| cg16598600 | 0.14352 | 0.351644865 | 1.292867 | 1.58E-05 | hypermethylated |
| cg01295203 | 0.17222 | 0.421955135 | 1.292837 | 3.30E-06 | hypermethylated |
| cg24761366 | 0.10228 | 0.250527568 | 1.292445 | 1.84E-05 | hypermethylated |
| cg03754403 | 0.13816 | 0.338402703 | 1.292401 | 3.57E-05 | hypermethylated |
| cg13658899 | 0.13318 | 0.326196757 | 1.292365 | 3.32E-05 | hypermethylated |
| cg05701791 | 0.11256 | 0.275691351 | 1.29236  | 1.62E-05 | hypermethylated |
| cg00891278 | 0.12882 | 0.31547027  | 1.292147 | 2.10E-05 | hypermethylated |
| cg24346905 | 0.16393 | 0.401370811 | 1.291856 | 0.000172 | hypermethylated |
| cg24881420 | 0.14197 | 0.347587027 | 1.291788 | 3.49E-06 | hypermethylated |
| cg10945079 | 0.12913 | 0.316034595 | 1.291258 | 6.05E-06 | hypermethylated |
| cg10373086 | 0.12602 | 0.308308108 | 1.29072  | 4.24E-06 | hypermethylated |
| cg08046044 | 0.1138  | 0.278408649 | 1.290703 | 0.00054  | hypermethylated |
| cg05676400 | 0.12184 | 0.298029189 | 1.290466 | 2.10E-05 | hypermethylated |
| cg12356951 | 0.13576 | 0.332058919 | 1.290381 | 5.58E-06 | hypermethylated |
| cg08668316 | 0.17477 | 0.427425405 | 1.290215 | 7.93E-06 | hypermethylated |
| cg03942855 | 0.14339 | 0.350507568 | 1.289501 | 0.000245 | hypermethylated |
| cg11510523 | 0.14155 | 0.346004324 | 1.289478 | 0.000248 | hypermethylated |
| cg26089160 | 0.13166 | 0.321784865 | 1.289279 | 0.000224 | hypermethylated |
| cg19620724 | 0.15119 | 0.369447027 | 1.289005 | 2.64E-06 | hypermethylated |
| cg03263618 | 0.12511 | 0.305707568 | 1.288955 | 1.99E-05 | hypermethylated |
| cg03815358 | 0.11933 | 0.291523243 | 1.288654 | 5.38E-05 | hypermethylated |
| cg14459130 | 0.14694 | 0.358952432 | 1.288565 | 3.04E-05 | hypermethylated |
| cg18653282 | 0.13763 | 0.336201081 | 1.288529 | 0.0002   | hypermethylated |
| cg02186542 | 0.12606 | 0.307926486 | 1.288475 | 7.52E-06 | hypermethylated |
| cg18030960 | 0.14132 | 0.345191892 | 1.288433 | 1.35E-05 | hypermethylated |
| cg09003833 | 0.14124 | 0.344988649 | 1.2884   | 1.94E-05 | hypermethylated |
| cg06607919 | 0.14451 | 0.352955135 | 1.288315 | 9.31E-06 | hypermethylated |
| cg22600043 | 0.12877 | 0.314503784 | 1.288281 | 9.60E-05 | hypermethylated |
| cg01730970 | 0.18888 | 0.461236757 | 1.288038 | 2.10E-05 | hypermethylated |
| cg25112312 | 0.12358 | 0.301756216 | 1.287938 | 4.36E-05 | hypermethylated |
| cg04991805 | 0.1585  | 0.386929189 | 1.287587 | 2.54E-05 | hypermethylated |
| cg27605748 | 0.11422 | 0.278815676 | 1.287496 | 4.47E-05 | hypermethylated |
| cg17514558 | 0.20627 | 0.503476216 | 1.28739  | 9.31E-06 | hypermethylated |
| cg21188820 | 0.10664 | 0.260246486 | 1.28713  | 2.71E-05 | hypermethylated |
| cg19125370 | 0.19857 | 0.484591892 | 1.287123 | 2.71E-06 | hypermethylated |
| cg07160746 | 0.1845  | 0.450245946 | 1.287092 | 9.31E-06 | hypermethylated |
| cg17508300 | 0.1192  | 0.290877838 | 1.287029 | 0.000495 | hypermethylated |

|            |         |             |          |          |                 |
|------------|---------|-------------|----------|----------|-----------------|
| cg17781313 | 0.12517 | 0.305401081 | 1.286816 | 6.95E-05 | hypermethylated |
| cg23346622 | 0.12893 | 0.314562703 | 1.28676  | 3.85E-05 | hypermethylated |
| cg19962990 | 0.15505 | 0.378289189 | 1.286756 | 1.26E-05 | hypermethylated |
| cg00393837 | 0.17067 | 0.416396757 | 1.286749 | 4.60E-06 | hypermethylated |
| cg20629239 | 0.11444 | 0.279152973 | 1.286465 | 3.44E-05 | hypermethylated |
| cg17007640 | 0.18624 | 0.454276757 | 1.286409 | 5.00E-06 | hypermethylated |
| cg17861230 | 0.19306 | 0.470876216 | 1.286299 | 3.85E-05 | hypermethylated |
| cg02885007 | 0.14052 | 0.342727568 | 1.286287 | 2.71E-06 | hypermethylated |
| cg23708361 | 0.16033 | 0.391023784 | 1.286212 | 0.000195 | hypermethylated |
| cg25234732 | 0.15446 | 0.376701081 | 1.286187 | 0.000234 | hypermethylated |
| cg14196225 | 0.14802 | 0.360982162 | 1.286135 | 8.84E-05 | hypermethylated |
| cg14289542 | 0.17881 | 0.435913514 | 1.285615 | 4.54E-06 | hypermethylated |
| cg20157525 | 0.14046 | 0.342397297 | 1.285512 | 0.000132 | hypermethylated |
| cg08874512 | 0.13598 | 0.331472973 | 1.285497 | 7.29E-05 | hypermethylated |
| cg04028570 | 0.15533 | 0.378544324 | 1.285126 | 9.49E-05 | hypermethylated |
| cg18599790 | 0.18759 | 0.457041081 | 1.284741 | 8.22E-05 | hypermethylated |
| cg08496953 | 0.19294 | 0.47006973  | 1.284723 | 9.44E-06 | hypermethylated |
| cg18538958 | 0.13067 | 0.318288649 | 1.284408 | 0.000613 | hypermethylated |
| cg08538258 | 0.17378 | 0.423261081 | 1.284286 | 0.000132 | hypermethylated |
| cg10778288 | 0.0915  | 0.222853514 | 1.284252 | 1.77E-05 | hypermethylated |
| cg20912770 | 0.13938 | 0.339462703 | 1.28423  | 0.000229 | hypermethylated |
| cg22355517 | 0.11473 | 0.279381622 | 1.283994 | 7.47E-05 | hypermethylated |
| cg20049415 | 0.18964 | 0.461727027 | 1.283777 | 1.66E-05 | hypermethylated |
| cg17062829 | 0.13726 | 0.334156216 | 1.283611 | 2.78E-05 | hypermethylated |
| cg14336011 | 0.13256 | 0.322691892 | 1.283512 | 7.65E-05 | hypermethylated |
| cg01085362 | 0.14958 | 0.364108108 | 1.28345  | 1.25E-05 | hypermethylated |
| cg16859420 | 0.15161 | 0.369011892 | 1.283302 | 1.46E-05 | hypermethylated |
| cg03789420 | 0.13472 | 0.327766486 | 1.282704 | 4.70E-05 | hypermethylated |
| cg16739441 | 0.1758  | 0.427520541 | 1.282059 | 8.37E-06 | hypermethylated |
| cg01656244 | 0.16485 | 0.400780541 | 1.281659 | 2.60E-06 | hypermethylated |
| cg19505136 | 0.20127 | 0.489275676 | 1.281515 | 3.67E-05 | hypermethylated |
| cg10428345 | 0.12668 | 0.307848649 | 1.281032 | 5.32E-05 | hypermethylated |
| cg24913868 | 0.18693 | 0.454258378 | 1.281015 | 2.57E-06 | hypermethylated |
| cg08417620 | 0.12931 | 0.314223243 | 1.280956 | 0.000135 | hypermethylated |
| cg15912800 | 0.16693 | 0.405612432 | 1.280859 | 0.000123 | hypermethylated |
| cg24066316 | 0.13924 | 0.338322703 | 1.280826 | 2.35E-05 | hypermethylated |
| cg19630629 | 0.1514  | 0.367825946 | 1.280658 | 6.95E-05 | hypermethylated |
| cg05043349 | 0.16727 | 0.40625027  | 1.28019  | 6.15E-05 | hypermethylated |
| cg04857033 | 0.20382 | 0.494982162 | 1.280081 | 1.22E-06 | hypermethylated |
| cg15505412 | 0.11642 | 0.282723784 | 1.280054 | 1.09E-05 | hypermethylated |
| cg22057720 | 0.1306  | 0.317129189 | 1.279916 | 7.65E-05 | hypermethylated |
| cg10863075 | 0.12174 | 0.295604324 | 1.279864 | 5.14E-06 | hypermethylated |
| cg05591716 | 0.12216 | 0.29652     | 1.279357 | 2.92E-05 | hypermethylated |
| cg05936441 | 0.14312 | 0.347338919 | 1.279119 | 4.42E-06 | hypermethylated |
| cg14401466 | 0.11437 | 0.277422703 | 1.278377 | 5.58E-05 | hypermethylated |
| cg01637233 | 0.10412 | 0.252544865 | 1.278292 | 1.06E-05 | hypermethylated |
| cg13140167 | 0.12207 | 0.29605027  | 1.278133 | 1.35E-05 | hypermethylated |
| cg15108727 | 0.17819 | 0.432130811 | 1.278052 | 1.01E-05 | hypermethylated |
| cg01574673 | 0.11982 | 0.290547568 | 1.277906 | 0.000104 | hypermethylated |
| cg08443038 | 0.10498 | 0.25454973  | 1.277833 | 2.78E-05 | hypermethylated |
| cg03634479 | 0.10235 | 0.248159459 | 1.277756 | 2.24E-05 | hypermethylated |
| cg18161327 | 0.21088 | 0.511231351 | 1.277554 | 5.14E-06 | hypermethylated |
| cg04556126 | 0.19527 | 0.473375135 | 1.277514 | 8.83E-06 | hypermethylated |
| cg26735846 | 0.13915 | 0.337244324 | 1.277153 | 0.000626 | hypermethylated |
| cg26667946 | 0.18905 | 0.458102162 | 1.276902 | 0.000234 | hypermethylated |
| cg20662725 | 0.13071 | 0.316625405 | 1.276408 | 0.000209 | hypermethylated |
| cg22976218 | 0.15719 | 0.380747027 | 1.276323 | 0.000287 | hypermethylated |
| cg08582356 | 0.13991 | 0.338844324 | 1.276124 | 3.26E-06 | hypermethylated |

|            |         |             |          |          |                 |
|------------|---------|-------------|----------|----------|-----------------|
| cg05646686 | 0.15261 | 0.36958973  | 1.276075 | 1.80E-05 | hypermethylated |
| cg11214140 | 0.21079 | 0.510452432 | 1.27597  | 9.31E-06 | hypermethylated |
| cg00942219 | 0.16297 | 0.394643243 | 1.275943 | 3.62E-05 | hypermethylated |
| cg20695433 | 0.12809 | 0.310042703 | 1.275309 | 9.57E-06 | hypermethylated |
| cg03411507 | 0.087   | 0.210492432 | 1.274681 | 7.65E-05 | hypermethylated |
| cg09557462 | 0.16306 | 0.394485946 | 1.274571 | 7.12E-06 | hypermethylated |
| cg25345178 | 0.13919 | 0.336729189 | 1.274533 | 0.00024  | hypermethylated |
| cg12530864 | 0.24378 | 0.589731892 | 1.274479 | 6.57E-06 | hypermethylated |
| cg21678813 | 0.18564 | 0.449048649 | 1.274364 | 2.07E-05 | hypermethylated |
| cg02569613 | 0.10968 | 0.265296216 | 1.274304 | 0.000106 | hypermethylated |
| cg05213609 | 0.12258 | 0.296498378 | 1.274301 | 7.20E-05 | hypermethylated |
| cg21052660 | 0.10796 | 0.261135135 | 1.2743   | 2.71E-05 | hypermethylated |
| cg09231171 | 0.1486  | 0.359416757 | 1.274224 | 0.000138 | hypermethylated |
| cg20779964 | 0.1926  | 0.46578     | 1.274041 | 1.35E-05 | hypermethylated |
| cg20339230 | 0.10808 | 0.261364865 | 1.273966 | 0.000178 | hypermethylated |
| cg17507671 | 0.12085 | 0.292213514 | 1.273805 | 1.21E-05 | hypermethylated |
| cg20432507 | 0.1332  | 0.321932973 | 1.273166 | 2.81E-05 | hypermethylated |
| cg17398677 | 0.11604 | 0.280384324 | 1.272783 | 1.09E-05 | hypermethylated |
| cg19350360 | 0.19526 | 0.471762162 | 1.272663 | 3.19E-05 | hypermethylated |
| cg05826596 | 0.14386 | 0.347550811 | 1.272558 | 3.32E-05 | hypermethylated |
| cg19082560 | 0.1299  | 0.313809189 | 1.272486 | 2.87E-06 | hypermethylated |
| cg10682299 | 0.14856 | 0.358817838 | 1.272206 | 4.82E-05 | hypermethylated |
| cg13944468 | 0.19691 | 0.475597838 | 1.272206 | 7.84E-05 | hypermethylated |
| cg26078977 | 0.17256 | 0.416743784 | 1.272063 | 5.86E-05 | hypermethylated |
| cg07006091 | 0.12669 | 0.30590973  | 1.271803 | 2.21E-05 | hypermethylated |
| cg15543551 | 0.11565 | 0.279235135 | 1.271715 | 0.000245 | hypermethylated |
| cg26053480 | 0.19151 | 0.46234     | 1.271534 | 4.24E-06 | hypermethylated |
| cg18198999 | 0.14725 | 0.355482703 | 1.271512 | 7.93E-05 | hypermethylated |
| cg21982455 | 0.16603 | 0.400741622 | 1.271228 | 3.74E-06 | hypermethylated |
| cg18417954 | 0.18653 | 0.450142703 | 1.270975 | 1.18E-05 | hypermethylated |
| cg11891393 | 0.16763 | 0.40446973  | 1.270751 | 7.29E-05 | hypermethylated |
| cg08491188 | 0.17253 | 0.416193514 | 1.270407 | 7.93E-06 | hypermethylated |
| cg27314569 | 0.18465 | 0.44534     | 1.270114 | 5.58E-06 | hypermethylated |
| cg03540175 | 0.13892 | 0.33501027  | 1.269951 | 0.000506 | hypermethylated |
| cg21817858 | 0.22641 | 0.545914595 | 1.269738 | 2.95E-06 | hypermethylated |
| cg21452281 | 0.16197 | 0.390517838 | 1.269662 | 2.87E-06 | hypermethylated |
| cg14941291 | 0.14246 | 0.343477297 | 1.269658 | 1.54E-05 | hypermethylated |
| cg19193956 | 0.17486 | 0.421578919 | 1.269602 | 6.62E-05 | hypermethylated |
| cg03638905 | 0.15846 | 0.38190973  | 1.269113 | 4.80E-06 | hypermethylated |
| cg23201513 | 0.10932 | 0.263447027 | 1.268956 | 6.62E-05 | hypermethylated |
| cg17270257 | 0.1559  | 0.37555027  | 1.268385 | 6.62E-05 | hypermethylated |
| cg01582980 | 0.14942 | 0.359767027 | 1.26769  | 0.000159 | hypermethylated |
| cg23929344 | 0.14525 | 0.349709189 | 1.267618 | 0.000234 | hypermethylated |
| cg19107469 | 0.14983 | 0.360692432 | 1.267443 | 1.75E-05 | hypermethylated |
| cg20894686 | 0.10319 | 0.248403243 | 1.267381 | 2.96E-05 | hypermethylated |
| cg13400168 | 0.14155 | 0.340741081 | 1.267364 | 1.84E-05 | hypermethylated |
| cg18291941 | 0.15595 | 0.375392973 | 1.267318 | 9.31E-06 | hypermethylated |
| cg06636427 | 0.15336 | 0.36906973  | 1.266971 | 4.82E-05 | hypermethylated |
| cg05076914 | 0.16001 | 0.385042703 | 1.266856 | 0.000122 | hypermethylated |
| cg02805665 | 0.11819 | 0.28432     | 1.266408 | 0.000214 | hypermethylated |
| cg27223047 | 0.20629 | 0.496207568 | 1.26627  | 5.45E-05 | hypermethylated |
| cg14186937 | 0.1327  | 0.319158919 | 1.266107 | 9.49E-05 | hypermethylated |
| cg11786193 | 0.09396 | 0.225951892 | 1.265897 | 0.000262 | hypermethylated |
| cg05099185 | 0.12738 | 0.306272973 | 1.265679 | 1.60E-05 | hypermethylated |
| cg26173630 | 0.1134  | 0.272528649 | 1.264987 | 1.71E-05 | hypermethylated |
| cg18164784 | 0.1536  | 0.369074054 | 1.264732 | 5.45E-05 | hypermethylated |
| cg16762735 | 0.11211 | 0.269281081 | 1.264198 | 2.64E-05 | hypermethylated |
| cg10567810 | 0.1274  | 0.305953514 | 1.263947 | 6.15E-05 | hypermethylated |

|            |         |             |          |          |                 |
|------------|---------|-------------|----------|----------|-----------------|
| cg26128092 | 0.15838 | 0.380327027 | 1.26385  | 1.66E-05 | hypermethylated |
| cg00250430 | 0.16477 | 0.395512973 | 1.263271 | 0.00018  | hypermethylated |
| cg10675138 | 0.12619 | 0.302874054 | 1.26312  | 0.000696 | hypermethylated |
| cg10298052 | 0.16901 | 0.405646486 | 1.263114 | 8.63E-05 | hypermethylated |
| cg17939805 | 0.13862 | 0.332696757 | 1.263072 | 4.12E-06 | hypermethylated |
| cg03934713 | 0.11882 | 0.285127027 | 1.262827 | 3.32E-05 | hypermethylated |
| cg25888561 | 0.2185  | 0.524282703 | 1.262712 | 1.52E-05 | hypermethylated |
| cg08832603 | 0.1716  | 0.411668649 | 1.262434 | 5.12E-05 | hypermethylated |
| cg23493016 | 0.16527 | 0.396481622 | 1.262429 | 3.95E-05 | hypermethylated |
| cg14741939 | 0.13712 | 0.328855676 | 1.262016 | 2.32E-05 | hypermethylated |
| cg16472050 | 0.18229 | 0.437100541 | 1.26173  | 3.21E-06 | hypermethylated |
| cg08829841 | 0.19653 | 0.471095676 | 1.261271 | 1.50E-05 | hypermethylated |
| cg15506157 | 0.23901 | 0.572904324 | 1.261223 | 0.003316 | hypermethylated |
| cg21656751 | 0.16232 | 0.389002703 | 1.260939 | 1.25E-05 | hypermethylated |
| cg07923686 | 0.16687 | 0.399859459 | 1.260768 | 1.97E-05 | hypermethylated |
| cg25756635 | 0.12969 | 0.310694054 | 1.260427 | 4.36E-05 | hypermethylated |
| cg13778709 | 0.12648 | 0.302961081 | 1.260223 | 1.39E-05 | hypermethylated |
| cg26492368 | 0.20093 | 0.481276757 | 1.260174 | 9.07E-06 | hypermethylated |
| cg23243038 | 0.12077 | 0.289235135 | 1.259981 | 2.30E-05 | hypermethylated |
| cg03340466 | 0.13526 | 0.323932432 | 1.259958 | 0.000445 | hypermethylated |
| cg23037403 | 0.12882 | 0.308388649 | 1.259393 | 2.32E-05 | hypermethylated |
| cg10767141 | 0.12761 | 0.305490811 | 1.259388 | 9.83E-05 | hypermethylated |
| cg23317501 | 0.16642 | 0.398330811 | 1.259138 | 3.21E-06 | hypermethylated |
| cg00412749 | 0.11235 | 0.268900541 | 1.259073 | 2.45E-05 | hypermethylated |
| cg14565725 | 0.20433 | 0.489033514 | 1.259032 | 4.24E-06 | hypermethylated |
| cg03688699 | 0.13306 | 0.31842     | 1.258854 | 8.42E-05 | hypermethylated |
| cg04178266 | 0.14229 | 0.340496757 | 1.258807 | 1.20E-05 | hypermethylated |
| cg06522054 | 0.12179 | 0.291375135 | 1.258482 | 9.05E-05 | hypermethylated |
| cg01586959 | 0.13566 | 0.324556216 | 1.258473 | 0.000178 | hypermethylated |
| cg01455568 | 0.12939 | 0.309442162 | 1.257944 | 7.47E-05 | hypermethylated |
| cg12021814 | 0.17055 | 0.407866486 | 1.257902 | 1.99E-05 | hypermethylated |
| cg11930477 | 0.13893 | 0.332235676 | 1.257849 | 5.35E-06 | hypermethylated |
| cg03348397 | 0.15572 | 0.372378378 | 1.257815 | 1.01E-05 | hypermethylated |
| cg07715201 | 0.11918 | 0.284989189 | 1.257765 | 4.82E-05 | hypermethylated |
| cg13974632 | 0.136   | 0.325168108 | 1.257579 | 0.000681 | hypermethylated |
| cg15345206 | 0.13756 | 0.328895135 | 1.257567 | 1.52E-05 | hypermethylated |
| cg16086559 | 0.17956 | 0.429227027 | 1.257275 | 9.38E-05 | hypermethylated |
| cg15268136 | 0.11063 | 0.264378378 | 1.256862 | 0.00018  | hypermethylated |
| cg01574663 | 0.14762 | 0.352690811 | 1.256516 | 1.71E-05 | hypermethylated |
| cg10991599 | 0.11032 | 0.263572973 | 1.256508 | 2.15E-05 | hypermethylated |
| cg07281879 | 0.18179 | 0.434323243 | 1.256496 | 7.93E-06 | hypermethylated |
| cg15621260 | 0.16874 | 0.403057297 | 1.256183 | 7.84E-05 | hypermethylated |
| cg02649597 | 0.1383  | 0.330338919 | 1.256146 | 4.42E-06 | hypermethylated |
| cg23479922 | 0.22288 | 0.532308649 | 1.255996 | 9.31E-06 | hypermethylated |
| cg07244354 | 0.12964 | 0.30954973  | 1.25566  | 7.93E-06 | hypermethylated |
| cg20977794 | 0.16548 | 0.394933514 | 1.254953 | 2.15E-05 | hypermethylated |
| cg01190024 | 0.16237 | 0.387423243 | 1.254625 | 2.10E-05 | hypermethylated |
| cg18745131 | 0.11639 | 0.277677297 | 1.254442 | 9.44E-06 | hypermethylated |
| cg13234863 | 0.14479 | 0.345381081 | 1.254227 | 2.57E-05 | hypermethylated |
| cg10638780 | 0.10507 | 0.25062973  | 1.254207 | 2.15E-05 | hypermethylated |
| cg27282264 | 0.19912 | 0.474916757 | 1.254037 | 3.15E-05 | hypermethylated |
| cg02593932 | 0.12997 | 0.309908649 | 1.253664 | 0.00024  | hypermethylated |
| cg26014036 | 0.1892  | 0.451087027 | 1.253494 | 2.74E-05 | hypermethylated |
| cg11856949 | 0.09782 | 0.233161622 | 1.253129 | 1.35E-05 | hypermethylated |
| cg07173635 | 0.15105 | 0.36002973  | 1.25309  | 1.35E-05 | hypermethylated |
| cg13298841 | 0.1793  | 0.427359459 | 1.253075 | 6.62E-05 | hypermethylated |
| cg10741333 | 0.12236 | 0.291600541 | 1.252861 | 0.000195 | hypermethylated |
| cg13844591 | 0.151   | 0.359803784 | 1.252662 | 5.93E-05 | hypermethylated |



|            |         |             |          |          |                 |
|------------|---------|-------------|----------|----------|-----------------|
| cg05937737 | 0.20847 | 0.496741081 | 1.252654 | 1.50E-05 | hypermethylated |
| cg09283154 | 0.131   | 0.312139459 | 1.252624 | 1.62E-05 | hypermethylated |
| cg06516124 | 0.1655  | 0.394321622 | 1.252542 | 3.67E-05 | hypermethylated |
| cg09366312 | 0.11389 | 0.271355135 | 1.252541 | 0.000229 | hypermethylated |
| cg11548303 | 0.13034 | 0.310544324 | 1.252519 | 0.000445 | hypermethylated |
| cg26980244 | 0.1958  | 0.4665      | 1.252496 | 7.32E-06 | hypermethylated |
| cg09251429 | 0.14605 | 0.347919459 | 1.252291 | 0.000696 | hypermethylated |
| cg14515453 | 0.1372  | 0.326827027 | 1.252247 | 1.35E-05 | hypermethylated |
| cg00177388 | 0.19048 | 0.453727568 | 1.252187 | 2.23E-06 | hypermethylated |
| cg00089091 | 0.15685 | 0.373596216 | 1.252094 | 0.000426 | hypermethylated |
| cg02473540 | 0.19051 | 0.453751351 | 1.252035 | 2.89E-05 | hypermethylated |
| cg10506882 | 0.14487 | 0.345046486 | 1.252032 | 9.60E-05 | hypermethylated |
| cg22070855 | 0.13441 | 0.320115135 | 1.25195  | 8.42E-05 | hypermethylated |
| cg04324666 | 0.14175 | 0.337589189 | 1.25192  | 1.28E-05 | hypermethylated |
| cg24286765 | 0.18159 | 0.432438919 | 1.251812 | 3.04E-06 | hypermethylated |
| cg19355079 | 0.14227 | 0.338678919 | 1.251287 | 9.44E-06 | hypermethylated |
| cg09617993 | 0.14312 | 0.340671892 | 1.251158 | 4.82E-05 | hypermethylated |
| cg17848763 | 0.13409 | 0.319108108 | 1.250844 | 7.74E-05 | hypermethylated |
| cg03108139 | 0.13345 | 0.317554054 | 1.250703 | 9.72E-05 | hypermethylated |
| cg13951074 | 0.12735 | 0.30296973  | 1.250375 | 1.62E-05 | hypermethylated |
| cg04591034 | 0.15805 | 0.375974595 | 1.250254 | 4.36E-06 | hypermethylated |
| cg23951961 | 0.16934 | 0.402817838 | 1.250205 | 1.06E-05 | hypermethylated |
| cg23618344 | 0.13392 | 0.318464865 | 1.249763 | 7.29E-05 | hypermethylated |
| cg14626309 | 0.20174 | 0.47968     | 1.249575 | 1.12E-05 | hypermethylated |
| cg10308833 | 0.11449 | 0.272223243 | 1.249569 | 0.000107 | hypermethylated |
| cg27635069 | 0.13888 | 0.330212432 | 1.249556 | 1.68E-05 | hypermethylated |
| cg04209913 | 0.27731 | 0.659326486 | 1.249493 | 3.90E-06 | hypermethylated |
| cg07104209 | 0.14554 | 0.346019459 | 1.249437 | 0.000102 | hypermethylated |
| cg18451814 | 0.19217 | 0.456881081 | 1.249436 | 6.57E-06 | hypermethylated |
| cg02681442 | 0.19384 | 0.46074973  | 1.249117 | 5.35E-06 | hypermethylated |
| cg23900203 | 0.15975 | 0.379713514 | 1.249095 | 1.99E-05 | hypermethylated |
| cg25739875 | 0.13478 | 0.320310811 | 1.248866 | 0.000268 | hypermethylated |
| cg00592781 | 0.14272 | 0.339118919 | 1.248604 | 0.000421 | hypermethylated |
| cg09643544 | 0.16608 | 0.394616216 | 1.248572 | 1.99E-06 | hypermethylated |
| cg09071889 | 0.16604 | 0.394504865 | 1.248512 | 1.99E-05 | hypermethylated |
| cg16638540 | 0.16418 | 0.38994     | 1.247974 | 2.10E-05 | hypermethylated |
| cg07681935 | 0.19326 | 0.458976757 | 1.247878 | 0.000166 | hypermethylated |
| cg16002818 | 0.16581 | 0.39375027  | 1.24775  | 1.89E-05 | hypermethylated |
| cg11750592 | 0.1454  | 0.345276757 | 1.247726 | 6.01E-05 | hypermethylated |
| cg21714266 | 0.17313 | 0.41107027  | 1.247529 | 2.64E-05 | hypermethylated |
| cg04926361 | 0.12424 | 0.294967568 | 1.247427 | 0.000259 | hypermethylated |
| cg07448060 | 0.13507 | 0.320623243 | 1.247172 | 0.00039  | hypermethylated |
| cg10298815 | 0.12772 | 0.303146486 | 1.247031 | 9.27E-05 | hypermethylated |
| cg07949597 | 0.19746 | 0.468644865 | 1.246935 | 6.01E-05 | hypermethylated |
| cg08393041 | 0.18807 | 0.446334595 | 1.246856 | 1.12E-05 | hypermethylated |
| cg21376883 | 0.1497  | 0.355269189 | 1.246838 | 1.37E-05 | hypermethylated |
| cg12196573 | 0.13392 | 0.317804865 | 1.24677  | 1.12E-05 | hypermethylated |
| cg21535606 | 0.14014 | 0.332562703 | 1.246758 | 1.58E-05 | hypermethylated |
| cg10238972 | 0.16287 | 0.386375676 | 1.246283 | 1.04E-05 | hypermethylated |
| cg01003961 | 0.20355 | 0.482854054 | 1.246204 | 1.12E-05 | hypermethylated |
| cg03391684 | 0.13593 | 0.32244     | 1.246167 | 0.000112 | hypermethylated |
| cg08470764 | 0.10871 | 0.257816757 | 1.245861 | 2.13E-05 | hypermethylated |
| cg09155219 | 0.10569 | 0.250602703 | 1.245563 | 4.60E-06 | hypermethylated |
| cg06765217 | 0.17537 | 0.415770811 | 1.245387 | 3.57E-05 | hypermethylated |
| cg17062109 | 0.13854 | 0.328451351 | 1.245377 | 0.000485 | hypermethylated |
| cg14659346 | 0.17533 | 0.415662162 | 1.245339 | 0.000191 | hypermethylated |
| cg18315960 | 0.16898 | 0.4006      | 1.24531  | 1.80E-05 | hypermethylated |
| cg09208611 | 0.11097 | 0.263024865 | 1.245029 | 0.000102 | hypermethylated |

|            |         |             |          |          |                 |
|------------|---------|-------------|----------|----------|-----------------|
| cg01104047 | 0.12114 | 0.287076216 | 1.244758 | 4.26E-05 | hypermethylated |
| cg05749717 | 0.1354  | 0.320695135 | 1.243975 | 0.00024  | hypermethylated |
| cg12424785 | 0.13865 | 0.328367568 | 1.243864 | 0.000166 | hypermethylated |
| cg00073837 | 0.17494 | 0.414245405 | 1.243625 | 2.79E-06 | hypermethylated |
| cg16524049 | 0.19378 | 0.458725946 | 1.243213 | 2.89E-05 | hypermethylated |
| cg05771261 | 0.11827 | 0.279921081 | 1.242936 | 2.39E-05 | hypermethylated |
| cg10648197 | 0.14084 | 0.333317838 | 1.242841 | 0.00012  | hypermethylated |
| cg21091227 | 0.12465 | 0.294932432 | 1.242502 | 2.04E-05 | hypermethylated |
| cg25508679 | 0.18516 | 0.438103784 | 1.2425   | 0.000511 | hypermethylated |
| cg12158272 | 0.1014  | 0.239912432 | 1.24245  | 4.10E-05 | hypermethylated |
| cg05658491 | 0.13762 | 0.325571351 | 1.242284 | 5.58E-05 | hypermethylated |
| cg10528576 | 0.2472  | 0.584743243 | 1.242125 | 0.000135 | hypermethylated |
| cg08278487 | 0.11841 | 0.280091892 | 1.242109 | 0.000237 | hypermethylated |
| cg23016129 | 0.16187 | 0.382785946 | 1.241702 | 1.12E-05 | hypermethylated |
| cg14795752 | 0.11556 | 0.273245946 | 1.241558 | 6.46E-05 | hypermethylated |
| cg05037662 | 0.14346 | 0.33916     | 1.241317 | 0.000104 | hypermethylated |
| cg26335633 | 0.13949 | 0.329655135 | 1.240796 | 7.12E-05 | hypermethylated |
| cg03748376 | 0.19161 | 0.452802703 | 1.24071  | 0.000174 | hypermethylated |
| cg27391267 | 0.16691 | 0.394357838 | 1.240435 | 3.36E-05 | hypermethylated |
| cg24871714 | 0.17877 | 0.422355676 | 1.240354 | 5.45E-05 | hypermethylated |
| cg09184467 | 0.07162 | 0.1692      | 1.240295 | 7.93E-05 | hypermethylated |
| cg16973098 | 0.18238 | 0.430858919 | 1.240268 | 5.06E-05 | hypermethylated |
| cg09257824 | 0.13524 | 0.319494054 | 1.240267 | 2.48E-05 | hypermethylated |
| cg06460717 | 0.13854 | 0.327287568 | 1.240256 | 0.000117 | hypermethylated |
| cg18445088 | 0.16555 | 0.391083243 | 1.240209 | 1.29E-06 | hypermethylated |
| cg09820150 | 0.12451 | 0.294058378 | 1.239841 | 2.71E-05 | hypermethylated |
| cg18073471 | 0.14771 | 0.348828649 | 1.239751 | 6.01E-05 | hypermethylated |
| cg05722918 | 0.09705 | 0.229175676 | 1.239654 | 0.0002   | hypermethylated |
| cg16147305 | 0.10165 | 0.240036216 | 1.239642 | 2.45E-05 | hypermethylated |
| cg14901205 | 0.19409 | 0.458277297 | 1.239495 | 5.51E-05 | hypermethylated |
| cg15829006 | 0.10156 | 0.239775135 | 1.23935  | 7.47E-05 | hypermethylated |
| cg25537434 | 0.1285  | 0.30336     | 1.239263 | 0.000346 | hypermethylated |
| cg09782540 | 0.12515 | 0.295434595 | 1.23918  | 1.66E-05 | hypermethylated |
| cg07304536 | 0.14177 | 0.334595676 | 1.238867 | 1.52E-05 | hypermethylated |
| cg09651145 | 0.15108 | 0.356498378 | 1.238583 | 0.000204 | hypermethylated |
| cg12810548 | 0.08017 | 0.18916973  | 1.238547 | 4.15E-05 | hypermethylated |
| cg13929328 | 0.17086 | 0.403058378 | 1.238174 | 3.59E-06 | hypermethylated |
| cg07713929 | 0.12405 | 0.292612432 | 1.238069 | 1.31E-05 | hypermethylated |
| cg12426652 | 0.16627 | 0.392123243 | 1.237779 | 3.85E-05 | hypermethylated |
| cg20859731 | 0.18957 | 0.447029189 | 1.237638 | 8.15E-06 | hypermethylated |
| cg02657836 | 0.17194 | 0.40544973  | 1.237618 | 6.93E-06 | hypermethylated |
| cg25775322 | 0.13371 | 0.315288649 | 1.237566 | 0.000109 | hypermethylated |
| cg18016181 | 0.16456 | 0.387934054 | 1.237198 | 5.58E-05 | hypermethylated |
| cg00875511 | 0.12924 | 0.304669189 | 1.237191 | 0.000274 | hypermethylated |
| cg13688769 | 0.10736 | 0.253080541 | 1.23714  | 0.000234 | hypermethylated |
| cg14230397 | 0.14477 | 0.341184865 | 1.236791 | 4.20E-05 | hypermethylated |
| cg21297493 | 0.20773 | 0.489544865 | 1.236732 | 2.05E-06 | hypermethylated |
| cg08475096 | 0.12329 | 0.290541081 | 1.236686 | 0.000259 | hypermethylated |
| cg11899535 | 0.16976 | 0.400014054 | 1.236554 | 2.85E-05 | hypermethylated |
| cg26509691 | 0.15498 | 0.365151892 | 1.236415 | 5.58E-06 | hypermethylated |
| cg27100227 | 0.1693  | 0.398842162 | 1.236236 | 8.32E-05 | hypermethylated |
| cg13691003 | 0.11895 | 0.280194054 | 1.236071 | 0.000191 | hypermethylated |
| cg06014958 | 0.1356  | 0.319342162 | 1.235746 | 1.42E-05 | hypermethylated |
| cg00486340 | 0.18144 | 0.427289189 | 1.23572  | 5.43E-06 | hypermethylated |
| cg20009101 | 0.12757 | 0.300415676 | 1.235671 | 1.84E-05 | hypermethylated |
| cg23409403 | 0.137   | 0.322589189 | 1.235522 | 4.05E-05 | hypermethylated |
| cg06535308 | 0.13514 | 0.318173514 | 1.235359 | 3.57E-05 | hypermethylated |
| cg06228507 | 0.15831 | 0.372654054 | 1.235085 | 6.39E-06 | hypermethylated |

|            |         |             |          |          |                 |
|------------|---------|-------------|----------|----------|-----------------|
| cg00779065 | 0.17652 | 0.41551027  | 1.235052 | 4.47E-05 | hypermethylated |
| cg12298745 | 0.17117 | 0.402805405 | 1.234653 | 2.04E-05 | hypermethylated |
| cg10319893 | 0.11705 | 0.275431351 | 1.234568 | 0.000161 | hypermethylated |
| cg10290276 | 0.15625 | 0.367488649 | 1.233843 | 5.19E-05 | hypermethylated |
| cg25542878 | 0.21663 | 0.509405405 | 1.233581 | 4.26E-05 | hypermethylated |
| cg08263708 | 0.14583 | 0.342824865 | 1.233184 | 4.12E-06 | hypermethylated |
| cg21100077 | 0.17734 | 0.416858919 | 1.233041 | 1.01E-05 | hypermethylated |
| cg07921625 | 0.14989 | 0.352332432 | 1.233033 | 3.69E-06 | hypermethylated |
| cg24642236 | 0.09859 | 0.231600541 | 1.232125 | 3.15E-05 | hypermethylated |
| cg04194073 | 0.13532 | 0.317839459 | 1.231923 | 3.15E-05 | hypermethylated |
| cg01462545 | 0.12219 | 0.286876757 | 1.231305 | 5.65E-05 | hypermethylated |
| cg25701114 | 0.16773 | 0.393738378 | 1.231097 | 0.0002   | hypermethylated |
| cg24653263 | 0.1562  | 0.366671892 | 1.231095 | 0.000132 | hypermethylated |
| cg03329976 | 0.17638 | 0.414021081 | 1.231017 | 1.71E-05 | hypermethylated |
| cg08529882 | 0.16017 | 0.375936757 | 1.230886 | 5.58E-06 | hypermethylated |
| cg12052765 | 0.13855 | 0.325176216 | 1.230815 | 2.27E-05 | hypermethylated |
| cg17051321 | 0.12373 | 0.290374054 | 1.230717 | 5.43E-06 | hypermethylated |
| cg25905812 | 0.12466 | 0.292491351 | 1.230395 | 0.0003   | hypermethylated |
| cg07552803 | 0.17513 | 0.410892432 | 1.230335 | 9.07E-06 | hypermethylated |
| cg21117210 | 0.14353 | 0.336705946 | 1.230137 | 4.36E-05 | hypermethylated |
| cg22187630 | 0.17284 | 0.405420541 | 1.229982 | 7.22E-06 | hypermethylated |
| cg15425280 | 0.12768 | 0.299480541 | 1.22993  | 9.49E-05 | hypermethylated |
| cg04022561 | 0.20189 | 0.473480541 | 1.229736 | 3.79E-06 | hypermethylated |
| cg25335557 | 0.11684 | 0.273982162 | 1.229548 | 6.23E-05 | hypermethylated |
| cg13581422 | 0.14149 | 0.331756757 | 1.229426 | 0.000212 | hypermethylated |
| cg14016236 | 0.24063 | 0.564176216 | 1.229329 | 3.67E-05 | hypermethylated |
| cg07949989 | 0.14064 | 0.329717838 | 1.229225 | 1.58E-06 | hypermethylated |
| cg04317962 | 0.20593 | 0.48264     | 1.228793 | 3.53E-05 | hypermethylated |
| cg26425256 | 0.12932 | 0.303084865 | 1.228776 | 8.94E-05 | hypermethylated |
| cg24035245 | 0.1954  | 0.457892432 | 1.228578 | 1.75E-05 | hypermethylated |
| cg07531228 | 0.10914 | 0.255652432 | 1.228004 | 1.71E-05 | hypermethylated |
| cg04043571 | 0.11357 | 0.266016216 | 1.227932 | 4.60E-06 | hypermethylated |
| cg16108230 | 0.18525 | 0.433910811 | 1.227925 | 9.31E-06 | hypermethylated |
| cg18750960 | 0.19004 | 0.445073514 | 1.227741 | 2.02E-05 | hypermethylated |
| cg17078253 | 0.17777 | 0.416302703 | 1.227621 | 1.21E-05 | hypermethylated |
| cg21088983 | 0.15571 | 0.364632973 | 1.227583 | 0.000108 | hypermethylated |
| cg18185958 | 0.1214  | 0.284274054 | 1.227514 | 1.94E-05 | hypermethylated |
| cg13540960 | 0.15404 | 0.360663243 | 1.227347 | 0.000346 | hypermethylated |
| cg06470822 | 0.13658 | 0.319716216 | 1.227046 | 5.58E-05 | hypermethylated |
| cg16705627 | 0.18234 | 0.426820541 | 1.226999 | 3.40E-05 | hypermethylated |
| cg22491141 | 0.16505 | 0.386181622 | 1.226376 | 1.31E-05 | hypermethylated |
| cg07675184 | 0.12791 | 0.299147568 | 1.225728 | 3.67E-05 | hypermethylated |
| cg01695225 | 0.16315 | 0.381539459 | 1.225633 | 0.000124 | hypermethylated |
| cg12089570 | 0.1458  | 0.340960541 | 1.225614 | 6.57E-06 | hypermethylated |
| cg14647451 | 0.14085 | 0.329376757 | 1.225579 | 8.94E-05 | hypermethylated |
| cg27294268 | 0.11342 | 0.265176757 | 1.225279 | 0.00024  | hypermethylated |
| cg18275316 | 0.17556 | 0.410316216 | 1.224772 | 5.84E-07 | hypermethylated |
| cg25617725 | 0.11652 | 0.27230973  | 1.224671 | 3.76E-05 | hypermethylated |
| cg01315916 | 0.17038 | 0.398151892 | 1.224563 | 3.59E-06 | hypermethylated |
| cg13371839 | 0.1538  | 0.35939027  | 1.224496 | 1.50E-05 | hypermethylated |
| cg08551532 | 0.17497 | 0.408851892 | 1.224471 | 9.72E-05 | hypermethylated |
| cg26709285 | 0.18974 | 0.443128108 | 1.2237   | 3.30E-06 | hypermethylated |
| cg21778348 | 0.13441 | 0.3139      | 1.223665 | 4.47E-05 | hypermethylated |
| cg16701059 | 0.14626 | 0.341542703 | 1.223531 | 4.60E-06 | hypermethylated |
| cg18736063 | 0.14529 | 0.339241081 | 1.223375 | 2.54E-05 | hypermethylated |
| cg14780132 | 0.13659 | 0.318824324 | 1.22291  | 0.000109 | hypermethylated |
| cg16198087 | 0.1264  | 0.295003243 | 1.222734 | 0.000172 | hypermethylated |
| cg12380743 | 0.21177 | 0.494118919 | 1.22236  | 1.66E-05 | hypermethylated |

|            |         |             |          |          |                 |
|------------|---------|-------------|----------|----------|-----------------|
| cg26988423 | 0.13847 | 0.323085946 | 1.222345 | 2.39E-05 | hypermethylated |
| cg10943359 | 0.16856 | 0.393265946 | 1.222243 | 1.06E-05 | hypermethylated |
| cg16536329 | 0.14307 | 0.33379027  | 1.222221 | 3.40E-05 | hypermethylated |
| cg18539122 | 0.18495 | 0.431464865 | 1.222108 | 3.69E-06 | hypermethylated |
| cg03255182 | 0.16468 | 0.384161622 | 1.222048 | 6.57E-06 | hypermethylated |
| cg19300741 | 0.0993  | 0.231631892 | 1.221968 | 1.26E-05 | hypermethylated |
| cg16907558 | 0.18222 | 0.424897838 | 1.221435 | 9.38E-05 | hypermethylated |
| cg06128028 | 0.12065 | 0.281256216 | 1.221057 | 4.73E-06 | hypermethylated |
| cg06497668 | 0.12995 | 0.302927568 | 1.221016 | 1.71E-05 | hypermethylated |
| cg20599066 | 0.10936 | 0.254888649 | 1.220782 | 2.57E-05 | hypermethylated |
| cg01142635 | 0.2001  | 0.466335135 | 1.220646 | 9.82E-06 | hypermethylated |
| cg15732768 | 0.16501 | 0.384543243 | 1.220592 | 1.50E-05 | hypermethylated |
| cg23572163 | 0.09276 | 0.216155676 | 1.220496 | 7.12E-06 | hypermethylated |
| cg09066326 | 0.14967 | 0.348656757 | 1.220022 | 7.65E-05 | hypermethylated |
| cg00903099 | 0.15232 | 0.354785405 | 1.219841 | 1.99E-05 | hypermethylated |
| cg16913789 | 0.12272 | 0.285817297 | 1.219723 | 6.31E-05 | hypermethylated |
| cg07405021 | 0.1066  | 0.248238378 | 1.219519 | 5.43E-06 | hypermethylated |
| cg17087640 | 0.13446 | 0.313081622 | 1.219362 | 0.000124 | hypermethylated |
| cg13397057 | 0.1482  | 0.345057297 | 1.21929  | 1.99E-05 | hypermethylated |
| cg15039102 | 0.1747  | 0.406734054 | 1.219206 | 1.62E-05 | hypermethylated |
| cg08012278 | 0.14835 | 0.34538     | 1.21918  | 1.35E-05 | hypermethylated |
| cg11938455 | 0.15453 | 0.359711892 | 1.218955 | 9.57E-06 | hypermethylated |
| cg23125492 | 0.1743  | 0.405616757 | 1.218545 | 5.43E-06 | hypermethylated |
| cg10018167 | 0.16402 | 0.38166973  | 1.218453 | 1.99E-05 | hypermethylated |
| cg01142710 | 0.15139 | 0.351964865 | 1.217162 | 4.15E-05 | hypermethylated |
| cg00842325 | 0.16892 | 0.392702162 | 1.217095 | 9.95E-05 | hypermethylated |
| cg00860808 | 0.15886 | 0.369285405 | 1.21698  | 6.31E-05 | hypermethylated |
| cg03099208 | 0.15438 | 0.358841081 | 1.216859 | 1.14E-05 | hypermethylated |
| cg09714379 | 0.15679 | 0.364377838 | 1.216602 | 0.000187 | hypermethylated |
| cg01685883 | 0.15028 | 0.349108108 | 1.216021 | 7.47E-05 | hypermethylated |
| cg01296889 | 0.16184 | 0.375957838 | 1.216003 | 4.05E-05 | hypermethylated |
| cg18693673 | 0.17584 | 0.408461081 | 1.215935 | 1.99E-05 | hypermethylated |
| cg15830509 | 0.11303 | 0.262543243 | 1.215849 | 1.71E-05 | hypermethylated |
| cg16158681 | 0.12535 | 0.291145946 | 1.215781 | 0.000303 | hypermethylated |
| cg22836229 | 0.14913 | 0.346355135 | 1.215682 | 0.000214 | hypermethylated |
| cg08204023 | 0.16331 | 0.379286486 | 1.215675 | 2.39E-05 | hypermethylated |
| cg18912520 | 0.15187 | 0.352714054 | 1.215662 | 2.32E-05 | hypermethylated |
| cg17857974 | 0.15758 | 0.365951892 | 1.21557  | 7.38E-05 | hypermethylated |
| cg14785479 | 0.10135 | 0.235356757 | 1.215503 | 1.46E-05 | hypermethylated |
| cg17093795 | 0.13434 | 0.31186973  | 1.215055 | 2.27E-05 | hypermethylated |
| cg09926747 | 0.13687 | 0.317702162 | 1.214869 | 0.000426 | hypermethylated |
| cg24932457 | 0.22657 | 0.525901081 | 1.214835 | 2.27E-05 | hypermethylated |
| cg00044796 | 0.17195 | 0.398987027 | 1.214353 | 0.000182 | hypermethylated |
| cg10241484 | 0.13543 | 0.314211892 | 1.21419  | 2.04E-05 | hypermethylated |
| cg09017434 | 0.21983 | 0.509956757 | 1.213987 | 6.13E-06 | hypermethylated |
| cg14452947 | 0.11303 | 0.26216973  | 1.213795 | 0.000378 | hypermethylated |
| cg12355110 | 0.17668 | 0.409748649 | 1.2136   | 1.04E-05 | hypermethylated |
| cg18425434 | 0.18416 | 0.427075135 | 1.21353  | 0.000117 | hypermethylated |
| cg06428620 | 0.20034 | 0.464552432 | 1.213391 | 0.000178 | hypermethylated |
| cg03087607 | 0.12796 | 0.296657297 | 1.213104 | 3.95E-05 | hypermethylated |
| cg18761549 | 0.17556 | 0.406970811 | 1.212961 | 1.84E-05 | hypermethylated |
| cg20038996 | 0.11317 | 0.262334054 | 1.212914 | 5.86E-05 | hypermethylated |
| cg18930354 | 0.11785 | 0.273172973 | 1.212863 | 2.57E-05 | hypermethylated |
| cg18293662 | 0.15722 | 0.364429189 | 1.212854 | 2.32E-05 | hypermethylated |
| cg16415058 | 0.16449 | 0.381220541 | 1.212626 | 1.15E-05 | hypermethylated |
| cg05678100 | 0.12186 | 0.282301081 | 1.21201  | 6.95E-05 | hypermethylated |
| cg10141715 | 0.1883  | 0.436112973 | 1.211669 | 1.62E-05 | hypermethylated |
| cg03526459 | 0.21116 | 0.489017297 | 1.211549 | 1.35E-05 | hypermethylated |

|            |         |             |          |          |                 |
|------------|---------|-------------|----------|----------|-----------------|
| cg02069715 | 0.186   | 0.430416757 | 1.210432 | 6.39E-06 | hypermethylated |
| cg05129325 | 0.19442 | 0.449872432 | 1.210339 | 2.42E-05 | hypermethylated |
| cg19718882 | 0.19172 | 0.443621622 | 1.210329 | 1.71E-05 | hypermethylated |
| cg04326198 | 0.1277  | 0.295479459 | 1.210299 | 2.10E-05 | hypermethylated |
| cg22945387 | 0.10326 | 0.23890973  | 1.210184 | 6.95E-05 | hypermethylated |
| cg08251037 | 0.14573 | 0.337168108 | 1.21017  | 8.37E-06 | hypermethylated |
| cg24680632 | 0.21413 | 0.495325405 | 1.20989  | 0.00012  | hypermethylated |
| cg05336395 | 0.23466 | 0.542683243 | 1.209538 | 2.05E-06 | hypermethylated |
| cg05710997 | 0.09994 | 0.231071892 | 1.209208 | 0.000327 | hypermethylated |
| cg11100386 | 0.13923 | 0.321911892 | 1.209196 | 4.26E-05 | hypermethylated |
| cg26597242 | 0.17596 | 0.406802703 | 1.209082 | 0.000287 | hypermethylated |
| cg03631131 | 0.14557 | 0.336516757 | 1.208965 | 3.49E-06 | hypermethylated |
| cg22813950 | 0.17359 | 0.401220541 | 1.208712 | 2.51E-05 | hypermethylated |
| cg07350501 | 0.14862 | 0.343486486 | 1.208625 | 1.12E-06 | hypermethylated |
| cg18236477 | 0.19597 | 0.452863243 | 1.208443 | 1.09E-05 | hypermethylated |
| cg01366595 | 0.13552 | 0.313106486 | 1.208148 | 5.00E-05 | hypermethylated |
| cg15149095 | 0.1595  | 0.368494595 | 1.208087 | 1.99E-05 | hypermethylated |
| cg07811198 | 0.19731 | 0.455762162 | 1.207817 | 1.01E-05 | hypermethylated |
| cg13563725 | 0.16336 | 0.377324865 | 1.207752 | 3.07E-05 | hypermethylated |
| cg01720455 | 0.15349 | 0.354463243 | 1.207491 | 4.86E-06 | hypermethylated |
| cg20116804 | 0.15692 | 0.362343784 | 1.20733  | 0.000115 | hypermethylated |
| cg00849713 | 0.13818 | 0.319043243 | 1.207203 | 6.62E-05 | hypermethylated |
| cg00733728 | 0.14702 | 0.339417838 | 1.20705  | 9.27E-05 | hypermethylated |
| cg15482122 | 0.14124 | 0.326062703 | 1.207001 | 2.21E-05 | hypermethylated |
| cg00348762 | 0.18906 | 0.436450811 | 1.206975 | 1.62E-05 | hypermethylated |
| cg14224762 | 0.11781 | 0.271963243 | 1.20695  | 0.000102 | hypermethylated |
| cg12230289 | 0.13851 | 0.319748108 | 1.206946 | 7.29E-05 | hypermethylated |
| cg10409302 | 0.12601 | 0.290853514 | 1.206755 | 0.000142 | hypermethylated |
| cg13623495 | 0.12895 | 0.297632973 | 1.206723 | 2.56E-06 | hypermethylated |
| cg24495585 | 0.17969 | 0.414591892 | 1.206182 | 0.000317 | hypermethylated |
| cg25562664 | 0.13518 | 0.311876216 | 1.206092 | 6.46E-05 | hypermethylated |
| cg04364726 | 0.08366 | 0.192988108 | 1.205902 | 0.000485 | hypermethylated |
| cg06845853 | 0.20058 | 0.462664865 | 1.20579  | 3.32E-05 | hypermethylated |
| cg10601940 | 0.17229 | 0.397363784 | 1.205621 | 5.58E-06 | hypermethylated |
| cg02919615 | 0.1855  | 0.427752973 | 1.205359 | 3.95E-05 | hypermethylated |
| cg18158990 | 0.1321  | 0.30458     | 1.205191 | 0.000293 | hypermethylated |
| cg19502744 | 0.15043 | 0.346826486 | 1.205122 | 8.22E-05 | hypermethylated |
| cg23075337 | 0.21474 | 0.495062703 | 1.20502  | 5.19E-05 | hypermethylated |
| cg17555373 | 0.1955  | 0.450589189 | 1.204644 | 1.09E-05 | hypermethylated |
| cg25319067 | 0.1742  | 0.401469189 | 1.204545 | 7.29E-05 | hypermethylated |
| cg01914621 | 0.16218 | 0.373754595 | 1.204495 | 3.15E-05 | hypermethylated |
| cg11344566 | 0.19219 | 0.442880541 | 1.204384 | 1.80E-05 | hypermethylated |
| cg04005969 | 0.17246 | 0.397378378 | 1.204252 | 3.15E-05 | hypermethylated |
| cg19716643 | 0.16567 | 0.38171027  | 1.204166 | 1.37E-05 | hypermethylated |
| cg25019989 | 0.14955 | 0.344545405 | 1.204066 | 2.92E-05 | hypermethylated |
| cg24361162 | 0.15252 | 0.351371892 | 1.204    | 3.00E-05 | hypermethylated |
| cg21875330 | 0.15348 | 0.353515135 | 1.203721 | 1.09E-05 | hypermethylated |
| cg13547644 | 0.14646 | 0.337255135 | 1.203334 | 5.73E-06 | hypermethylated |
| cg20084504 | 0.15915 | 0.366423784 | 1.203126 | 8.60E-06 | hypermethylated |
| cg25746778 | 0.26212 | 0.603483784 | 1.203088 | 3.90E-06 | hypermethylated |
| cg15703632 | 0.12189 | 0.28062     | 1.203038 | 0.000237 | hypermethylated |
| cg09143673 | 0.15711 | 0.361693514 | 1.202993 | 4.94E-05 | hypermethylated |
| cg08189801 | 0.14175 | 0.326331351 | 1.202989 | 7.12E-05 | hypermethylated |
| cg26659079 | 0.16572 | 0.381471892 | 1.202829 | 2.95E-06 | hypermethylated |
| cg19509393 | 0.17021 | 0.391760541 | 1.202656 | 1.35E-05 | hypermethylated |
| cg24507762 | 0.13091 | 0.301267027 | 1.202467 | 6.15E-05 | hypermethylated |
| cg08790440 | 0.16766 | 0.385794595 | 1.202294 | 3.07E-05 | hypermethylated |
| cg17486860 | 0.14221 | 0.327122703 | 1.201809 | 8.94E-05 | hypermethylated |

|            |         |             |          |          |                 |
|------------|---------|-------------|----------|----------|-----------------|
| cg20674635 | 0.12925 | 0.297267027 | 1.201595 | 2.15E-05 | hypermethylated |
| cg19848629 | 0.12616 | 0.29010973  | 1.201344 | 0.000113 | hypermethylated |
| cg21728840 | 0.17462 | 0.401506486 | 1.201204 | 3.15E-05 | hypermethylated |
| cg04352272 | 0.14666 | 0.337184324 | 1.201062 | 0.00012  | hypermethylated |
| cg12146673 | 0.12562 | 0.288790811 | 1.200959 | 0.000268 | hypermethylated |
| cg10752158 | 0.17429 | 0.400642703 | 1.200826 | 2.48E-05 | hypermethylated |
| cg07124117 | 0.14869 | 0.341767568 | 1.200708 | 6.70E-05 | hypermethylated |
| cg13758543 | 0.18119 | 0.416457297 | 1.200665 | 4.26E-05 | hypermethylated |
| cg00945234 | 0.12808 | 0.294355135 | 1.200513 | 2.96E-05 | hypermethylated |
| cg04101351 | 0.11367 | 0.261236216 | 1.200503 | 9.05E-05 | hypermethylated |
| cg20576153 | 0.1343  | 0.308574595 | 1.20016  | 5.45E-05 | hypermethylated |
| cg24431667 | 0.11938 | 0.274287027 | 1.200125 | 0.00012  | hypermethylated |
| cg20653075 | 0.147   | 0.337631892 | 1.199635 | 1.18E-05 | hypermethylated |
| cg18267374 | 0.1408  | 0.323331892 | 1.199368 | 8.60E-06 | hypermethylated |
| cg07871947 | 0.13973 | 0.320741081 | 1.198767 | 3.67E-05 | hypermethylated |
| cg00629514 | 0.15813 | 0.362861622 | 1.198308 | 3.49E-05 | hypermethylated |
| cg10157715 | 0.14809 | 0.339780541 | 1.198129 | 7.52E-06 | hypermethylated |
| cg00534492 | 0.1269  | 0.29112973  | 1.19797  | 3.15E-05 | hypermethylated |
| cg03887163 | 0.12712 | 0.291622703 | 1.197912 | 2.51E-05 | hypermethylated |
| cg05827312 | 0.15421 | 0.353728108 | 1.197745 | 7.72E-06 | hypermethylated |
| cg24292761 | 0.19741 | 0.452747568 | 1.197512 | 2.42E-05 | hypermethylated |
| cg24947764 | 0.12828 | 0.294116216 | 1.19709  | 0.000147 | hypermethylated |
| cg23602974 | 0.11519 | 0.264080541 | 1.196963 | 8.15E-06 | hypermethylated |
| cg22418829 | 0.12916 | 0.296094595 | 1.196899 | 3.04E-05 | hypermethylated |
| cg27079680 | 0.14954 | 0.342741622 | 1.19659  | 2.85E-05 | hypermethylated |
| cg05895545 | 0.14009 | 0.321060541 | 1.196491 | 9.07E-06 | hypermethylated |
| cg10132208 | 0.19379 | 0.444022162 | 1.196138 | 8.83E-06 | hypermethylated |
| cg00630958 | 0.14088 | 0.322779459 | 1.196082 | 0.000115 | hypermethylated |
| cg21305834 | 0.13537 | 0.310138919 | 1.196007 | 1.77E-05 | hypermethylated |
| cg09919570 | 0.19715 | 0.451555135 | 1.195608 | 0.000214 | hypermethylated |
| cg20822372 | 0.11566 | 0.264898919 | 1.195552 | 0.000109 | hypermethylated |
| cg27136844 | 0.1996  | 0.457094595 | 1.195381 | 5.32E-05 | hypermethylated |
| cg13080379 | 0.15863 | 0.363108649 | 1.194736 | 3.04E-06 | hypermethylated |
| cg14089714 | 0.16486 | 0.377358919 | 1.194696 | 1.89E-05 | hypermethylated |
| cg15984718 | 0.12247 | 0.280266486 | 1.194371 | 0.000306 | hypermethylated |
| cg11469098 | 0.14745 | 0.337429189 | 1.194359 | 0.000921 | hypermethylated |
| cg24811864 | 0.15198 | 0.347787027 | 1.194323 | 3.15E-05 | hypermethylated |
| cg02623400 | 0.16663 | 0.381289189 | 1.194237 | 1.89E-05 | hypermethylated |
| cg11573566 | 0.15776 | 0.360931351 | 1.193993 | 0.000129 | hypermethylated |
| cg04081201 | 0.13268 | 0.303456757 | 1.19354  | 6.31E-05 | hypermethylated |
| cg01352175 | 0.15112 | 0.345590811 | 1.19337  | 4.86E-06 | hypermethylated |
| cg07751641 | 0.09735 | 0.222574595 | 1.193036 | 2.79E-06 | hypermethylated |
| cg05477514 | 0.15358 | 0.351121081 | 1.192978 | 2.64E-05 | hypermethylated |
| cg17282395 | 0.16258 | 0.371682703 | 1.192922 | 0.000207 | hypermethylated |
| cg23008606 | 0.13266 | 0.303251892 | 1.192783 | 4.94E-05 | hypermethylated |
| cg06966113 | 0.18338 | 0.419183243 | 1.192745 | 3.04E-06 | hypermethylated |
| cg14617562 | 0.10811 | 0.247101081 | 1.192601 | 0.000789 | hypermethylated |
| cg16197717 | 0.16457 | 0.376089189 | 1.192373 | 1.09E-05 | hypermethylated |
| cg23704517 | 0.1608  | 0.367470811 | 1.192362 | 0.000219 | hypermethylated |
| cg03914922 | 0.11561 | 0.264161622 | 1.192155 | 3.67E-05 | hypermethylated |
| cg25027798 | 0.18236 | 0.416641081 | 1.192016 | 6.93E-06 | hypermethylated |
| cg25708328 | 0.1361  | 0.310858919 | 1.191593 | 1.58E-05 | hypermethylated |
| cg19951663 | 0.12136 | 0.277172973 | 1.191494 | 6.78E-05 | hypermethylated |
| cg08575537 | 0.1747  | 0.398945405 | 1.191312 | 0.000931 | hypermethylated |
| cg24509810 | 0.1872  | 0.427476757 | 1.191266 | 5.73E-06 | hypermethylated |
| cg02677946 | 0.11718 | 0.267545946 | 1.19106  | 0.000106 | hypermethylated |
| cg06340987 | 0.20604 | 0.470376757 | 1.190892 | 1.62E-05 | hypermethylated |
| cg21035875 | 0.15234 | 0.347780541 | 1.190882 | 4.88E-05 | hypermethylated |

|            |         |             |          |          |                 |
|------------|---------|-------------|----------|----------|-----------------|
| cg02362103 | 0.19464 | 0.444347027 | 1.190879 | 1.94E-05 | hypermethylated |
| cg04104463 | 0.15517 | 0.354079459 | 1.190223 | 2.71E-05 | hypermethylated |
| cg00505045 | 0.16263 | 0.371093514 | 1.190189 | 4.12E-06 | hypermethylated |
| cg01066602 | 0.15552 | 0.354708108 | 1.189532 | 1.62E-05 | hypermethylated |
| cg10434261 | 0.14377 | 0.327888108 | 1.189441 | 0.000154 | hypermethylated |
| cg26721877 | 0.20424 | 0.465731351 | 1.189233 | 1.01E-05 | hypermethylated |
| cg17023149 | 0.12152 | 0.277081081 | 1.189114 | 0.000161 | hypermethylated |
| cg16211684 | 0.12646 | 0.288341622 | 1.189098 | 0.000119 | hypermethylated |
| cg04895345 | 0.17533 | 0.399710811 | 1.188884 | 3.53E-05 | hypermethylated |
| cg03338754 | 0.19838 | 0.45221027  | 1.188727 | 1.58E-05 | hypermethylated |
| cg08582701 | 0.14503 | 0.330579459 | 1.188646 | 1.01E-05 | hypermethylated |
| cg21926708 | 0.12553 | 0.286126486 | 1.188621 | 0.000132 | hypermethylated |
| cg21694941 | 0.18972 | 0.432417838 | 1.188554 | 6.39E-06 | hypermethylated |
| cg19414741 | 0.18467 | 0.420876757 | 1.188448 | 5.21E-06 | hypermethylated |
| cg06263341 | 0.14321 | 0.32632     | 1.188155 | 5.06E-05 | hypermethylated |
| cg02039267 | 0.18363 | 0.418035135 | 1.186822 | 1.62E-05 | hypermethylated |
| cg18101138 | 0.13424 | 0.305558378 | 1.186633 | 0.000187 | hypermethylated |
| cg16043144 | 0.1231  | 0.280062703 | 1.185919 | 0.000219 | hypermethylated |
| cg10832108 | 0.14338 | 0.326052973 | 1.185263 | 1.73E-05 | hypermethylated |
| cg00017489 | 0.19204 | 0.436630811 | 1.185007 | 5.58E-05 | hypermethylated |
| cg00336320 | 0.15699 | 0.356836757 | 1.184592 | 5.43E-06 | hypermethylated |
| cg09290600 | 0.15252 | 0.346635135 | 1.184419 | 4.58E-05 | hypermethylated |
| cg17862113 | 0.1555  | 0.353294595 | 1.183957 | 9.07E-06 | hypermethylated |
| cg00347369 | 0.13597 | 0.308903784 | 1.183869 | 8.84E-05 | hypermethylated |
| cg22354782 | 0.14337 | 0.325672432 | 1.183678 | 0.00012  | hypermethylated |
| cg14134497 | 0.15323 | 0.34806973  | 1.183678 | 0.000104 | hypermethylated |
| cg18944010 | 0.17133 | 0.389168108 | 1.183616 | 9.57E-06 | hypermethylated |
| cg02531437 | 0.15391 | 0.349593514 | 1.183591 | 1.50E-05 | hypermethylated |
| cg01297721 | 0.15064 | 0.342075135 | 1.183208 | 0.000646 | hypermethylated |
| cg04819096 | 0.12111 | 0.275014054 | 1.183187 | 2.32E-05 | hypermethylated |
| cg24880701 | 0.17444 | 0.396037838 | 1.182907 | 6.15E-05 | hypermethylated |
| cg00816770 | 0.16685 | 0.378805405 | 1.182905 | 5.73E-06 | hypermethylated |
| cg10902717 | 0.13067 | 0.296651351 | 1.18284  | 7.20E-05 | hypermethylated |
| cg15634877 | 0.16183 | 0.367384865 | 1.182813 | 5.32E-05 | hypermethylated |
| cg26332310 | 0.17326 | 0.393268108 | 1.182575 | 4.53E-05 | hypermethylated |
| cg04837104 | 0.15582 | 0.353588108 | 1.182189 | 1.58E-05 | hypermethylated |
| cg19526659 | 0.14484 | 0.328636216 | 1.182031 | 1.75E-05 | hypermethylated |
| cg19846314 | 0.18884 | 0.428447027 | 1.181952 | 7.65E-05 | hypermethylated |
| cg10678266 | 0.189   | 0.428803784 | 1.181931 | 0.000129 | hypermethylated |
| cg17076890 | 0.18448 | 0.418514595 | 1.181814 | 1.42E-05 | hypermethylated |
| cg08195247 | 0.1489  | 0.337786486 | 1.181768 | 0.000327 | hypermethylated |
| cg15871127 | 0.1323  | 0.300114054 | 1.181698 | 5.00E-05 | hypermethylated |
| cg04365452 | 0.14588 | 0.330675676 | 1.180635 | 2.10E-05 | hypermethylated |
| cg07498275 | 0.14023 | 0.317862162 | 1.180606 | 1.28E-05 | hypermethylated |
| cg07338917 | 0.12526 | 0.283876757 | 1.180339 | 4.58E-05 | hypermethylated |
| cg11379081 | 0.23928 | 0.542258378 | 1.180281 | 1.80E-05 | hypermethylated |
| cg04971534 | 0.18833 | 0.426718919 | 1.180023 | 3.27E-05 | hypermethylated |
| cg17951138 | 0.19435 | 0.440274595 | 1.179746 | 6.05E-06 | hypermethylated |
| cg08983097 | 0.12385 | 0.280555135 | 1.17969  | 2.92E-05 | hypermethylated |
| cg07664005 | 0.09273 | 0.210001081 | 1.179289 | 1.87E-05 | hypermethylated |
| cg03593833 | 0.09595 | 0.217276216 | 1.179176 | 7.84E-05 | hypermethylated |
| cg03285577 | 0.13187 | 0.298426486 | 1.178259 | 5.28E-06 | hypermethylated |
| cg00741609 | 0.15515 | 0.351104865 | 1.178238 | 2.57E-05 | hypermethylated |
| cg04453140 | 0.13486 | 0.305162703 | 1.178116 | 8.83E-06 | hypermethylated |
| cg10981651 | 0.18663 | 0.422287027 | 1.178043 | 6.93E-06 | hypermethylated |
| cg22536150 | 0.1763  | 0.398911892 | 1.178038 | 9.07E-06 | hypermethylated |
| cg19728226 | 0.14245 | 0.322276216 | 1.177842 | 4.05E-05 | hypermethylated |
| cg16005494 | 0.18878 | 0.426997838 | 1.177523 | 8.60E-06 | hypermethylated |

|            |         |             |          |          |                 |
|------------|---------|-------------|----------|----------|-----------------|
| cg14871932 | 0.17903 | 0.404925946 | 1.177457 | 4.73E-06 | hypermethylated |
| cg00247557 | 0.17566 | 0.397271892 | 1.177341 | 2.27E-05 | hypermethylated |
| cg21346043 | 0.20913 | 0.472925405 | 1.177213 | 2.56E-06 | hypermethylated |
| cg03190266 | 0.15653 | 0.353964324 | 1.177165 | 0.000232 | hypermethylated |
| cg20229496 | 0.12282 | 0.277711892 | 1.177043 | 0.00028  | hypermethylated |
| cg15069295 | 0.15719 | 0.355420541 | 1.177018 | 2.04E-05 | hypermethylated |
| cg16081281 | 0.15622 | 0.353195676 | 1.176889 | 1.31E-05 | hypermethylated |
| cg16301890 | 0.18686 | 0.422383243 | 1.176595 | 8.52E-05 | hypermethylated |
| cg18556676 | 0.18616 | 0.420772432 | 1.176497 | 1.50E-05 | hypermethylated |
| cg17098147 | 0.17246 | 0.389765946 | 1.176346 | 2.45E-05 | hypermethylated |
| cg24643282 | 0.14111 | 0.318911892 | 1.176338 | 3.85E-05 | hypermethylated |
| cg18264657 | 0.12963 | 0.292937297 | 1.176192 | 1.58E-05 | hypermethylated |
| cg16092786 | 0.13455 | 0.304032973 | 1.176085 | 5.38E-05 | hypermethylated |
| cg03671597 | 0.17258 | 0.389902162 | 1.175847 | 2.10E-05 | hypermethylated |
| cg10140638 | 0.16592 | 0.374843784 | 1.175802 | 3.57E-05 | hypermethylated |
| cg09409539 | 0.14239 | 0.321515676 | 1.175041 | 1.99E-05 | hypermethylated |
| cg04023483 | 0.14158 | 0.319678919 | 1.175006 | 0.00012  | hypermethylated |
| cg22995692 | 0.1721  | 0.388561622 | 1.174896 | 0.000142 | hypermethylated |
| cg09302895 | 0.18071 | 0.407983243 | 1.174834 | 5.14E-06 | hypermethylated |
| cg03740167 | 0.15372 | 0.347014054 | 1.174689 | 7.52E-06 | hypermethylated |
| cg13544851 | 0.10244 | 0.231210811 | 1.17443  | 0.00028  | hypermethylated |
| cg09049251 | 0.19187 | 0.433048649 | 1.1744   | 1.31E-05 | hypermethylated |
| cg23683254 | 0.18104 | 0.40857027  | 1.174276 | 5.45E-05 | hypermethylated |
| cg02940165 | 0.18255 | 0.411857838 | 1.173855 | 6.93E-06 | hypermethylated |
| cg25024717 | 0.15848 | 0.357344324 | 1.173014 | 1.58E-05 | hypermethylated |
| cg14189571 | 0.22127 | 0.498774054 | 1.172579 | 1.28E-05 | hypermethylated |
| cg19122389 | 0.13997 | 0.315500541 | 1.172525 | 1.42E-05 | hypermethylated |
| cg16440561 | 0.28311 | 0.638122162 | 1.17247  | 1.14E-05 | hypermethylated |
| cg10327400 | 0.15862 | 0.357494595 | 1.172347 | 3.07E-05 | hypermethylated |
| cg18366919 | 0.17002 | 0.383058378 | 1.17186  | 2.02E-05 | hypermethylated |
| cg00916536 | 0.18619 | 0.419373514 | 1.17146  | 0.000338 | hypermethylated |
| cg06498267 | 0.13836 | 0.31162     | 1.171361 | 0.000268 | hypermethylated |
| cg18110483 | 0.18191 | 0.409622703 | 1.171071 | 4.58E-05 | hypermethylated |
| cg17015844 | 0.12818 | 0.288587568 | 1.170838 | 1.50E-05 | hypermethylated |
| cg09384610 | 0.19282 | 0.434112973 | 1.170816 | 5.38E-05 | hypermethylated |
| cg18239431 | 0.20793 | 0.468128108 | 1.170805 | 2.15E-05 | hypermethylated |
| cg00378510 | 0.17763 | 0.399765405 | 1.170278 | 0.000313 | hypermethylated |
| cg16202340 | 0.15306 | 0.344400541 | 1.16999  | 3.95E-05 | hypermethylated |
| cg01819137 | 0.1027  | 0.231005405 | 1.16949  | 6.30E-06 | hypermethylated |
| cg04986616 | 0.10368 | 0.233147027 | 1.169102 | 0.00017  | hypermethylated |
| cg23271831 | 0.13986 | 0.314415676 | 1.16869  | 0.000148 | hypermethylated |
| cg11410718 | 0.19117 | 0.429756757 | 1.168664 | 4.15E-05 | hypermethylated |
| cg16316519 | 0.14073 | 0.31630973  | 1.168408 | 7.32E-06 | hypermethylated |
| cg09497201 | 0.18403 | 0.413566486 | 1.168178 | 2.85E-05 | hypermethylated |
| cg08648727 | 0.17537 | 0.394012432 | 1.167839 | 2.92E-05 | hypermethylated |
| cg12547166 | 0.17026 | 0.382521622 | 1.167802 | 1.75E-05 | hypermethylated |
| cg17046577 | 0.13339 | 0.299680541 | 1.167775 | 0.000219 | hypermethylated |
| cg15688551 | 0.12069 | 0.271143784 | 1.167752 | 2.74E-05 | hypermethylated |
| cg08813062 | 0.17072 | 0.383536757 | 1.167733 | 1.84E-05 | hypermethylated |
| cg02245378 | 0.14845 | 0.333490811 | 1.16767  | 1.09E-05 | hypermethylated |
| cg21760402 | 0.14277 | 0.320662703 | 1.167364 | 0.000145 | hypermethylated |
| cg25203481 | 0.21903 | 0.491887027 | 1.167199 | 1.07E-06 | hypermethylated |
| cg10689404 | 0.22871 | 0.513589189 | 1.167095 | 7.93E-06 | hypermethylated |
| cg02750098 | 0.11326 | 0.254302703 | 1.166908 | 4.64E-05 | hypermethylated |
| cg07135032 | 0.1583  | 0.35542     | 1.166864 | 0.001    | hypermethylated |
| cg05158615 | 0.1622  | 0.364169189 | 1.166835 | 4.47E-05 | hypermethylated |
| cg04207084 | 0.19463 | 0.43697027  | 1.166801 | 4.01E-06 | hypermethylated |
| cg02109405 | 0.13276 | 0.29804973  | 1.166733 | 0.000115 | hypermethylated |



|            |         |             |          |          |                 |
|------------|---------|-------------|----------|----------|-----------------|
| cg16334250 | 0.11175 | 0.250870811 | 1.16667  | 6.62E-05 | hypermethylated |
| cg02086467 | 0.15325 | 0.344021081 | 1.16661  | 5.89E-06 | hypermethylated |
| cg07463541 | 0.26062 | 0.584997297 | 1.166482 | 9.11E-07 | hypermethylated |
| cg11889068 | 0.11987 | 0.269059459 | 1.166454 | 2.67E-05 | hypermethylated |
| cg04299439 | 0.17537 | 0.393621081 | 1.166406 | 1.41E-06 | hypermethylated |
| cg13891978 | 0.13311 | 0.298738919 | 1.166266 | 0.000142 | hypermethylated |
| cg12610471 | 0.19847 | 0.445379459 | 1.166114 | 1.28E-05 | hypermethylated |
| cg04367345 | 0.13673 | 0.306814595 | 1.166037 | 5.79E-05 | hypermethylated |
| cg24136205 | 0.18249 | 0.409490811 | 1.166014 | 3.04E-06 | hypermethylated |
| cg17607298 | 0.20628 | 0.46286973  | 1.166002 | 3.39E-06 | hypermethylated |
| cg26503073 | 0.18832 | 0.422552432 | 1.165944 | 4.48E-06 | hypermethylated |
| cg24740868 | 0.21958 | 0.492617297 | 1.165721 | 2.95E-06 | hypermethylated |
| cg09816507 | 0.13782 | 0.309166486 | 1.165599 | 9.16E-05 | hypermethylated |
| cg27361370 | 0.19361 | 0.434304865 | 1.165555 | 6.93E-06 | hypermethylated |
| cg00767010 | 0.18112 | 0.406214054 | 1.165294 | 0.000219 | hypermethylated |
| cg05589845 | 0.13111 | 0.294011351 | 1.165094 | 0.000214 | hypermethylated |
| cg08333333 | 0.18724 | 0.419874595 | 1.16507  | 4.24E-06 | hypermethylated |
| cg11969556 | 0.13872 | 0.311035135 | 1.164902 | 1.94E-05 | hypermethylated |
| cg23646776 | 0.10732 | 0.240621622 | 1.164847 | 0.000112 | hypermethylated |
| cg27316886 | 0.17921 | 0.401702162 | 1.164475 | 1.60E-05 | hypermethylated |
| cg07687119 | 0.1647  | 0.369128649 | 1.164283 | 2.51E-05 | hypermethylated |
| cg19813025 | 0.15886 | 0.356036216 | 1.164268 | 9.82E-06 | hypermethylated |
| cg04317399 | 0.17914 | 0.401335135 | 1.16372  | 4.73E-06 | hypermethylated |
| cg23891996 | 0.12732 | 0.285238919 | 1.163712 | 6.78E-05 | hypermethylated |
| cg00345443 | 0.16247 | 0.363941081 | 1.163532 | 0.000287 | hypermethylated |
| cg11930400 | 0.11983 | 0.268422162 | 1.163515 | 4.31E-05 | hypermethylated |
| cg18652346 | 0.20541 | 0.45999027  | 1.163097 | 1.89E-05 | hypermethylated |
| cg21545390 | 0.1631  | 0.365214595 | 1.162988 | 1.40E-05 | hypermethylated |
| cg02720618 | 0.13609 | 0.304644324 | 1.162565 | 0.001031 | hypermethylated |
| cg16137147 | 0.18294 | 0.409491892 | 1.162464 | 0.000474 | hypermethylated |
| cg05872306 | 0.13985 | 0.313030811 | 1.162424 | 1.75E-05 | hypermethylated |
| cg17880014 | 0.15058 | 0.337020541 | 1.162306 | 2.18E-05 | hypermethylated |
| cg10676084 | 0.1831  | 0.409623784 | 1.161668 | 2.85E-05 | hypermethylated |
| cg10189695 | 0.16092 | 0.359960541 | 1.161495 | 0.00012  | hypermethylated |
| cg22041640 | 0.16686 | 0.373137297 | 1.161068 | 2.91E-06 | hypermethylated |
| cg04024095 | 0.12207 | 0.272952432 | 1.160941 | 0.000219 | hypermethylated |
| cg07563793 | 0.1383  | 0.309131351 | 1.160419 | 1.68E-05 | hypermethylated |
| cg16117799 | 0.17896 | 0.400001622 | 1.160369 | 2.10E-05 | hypermethylated |
| cg11142389 | 0.22554 | 0.504074595 | 1.160254 | 2.85E-05 | hypermethylated |
| cg10828337 | 0.134   | 0.299445946 | 1.160063 | 9.19E-06 | hypermethylated |
| cg20303399 | 0.16394 | 0.36635027  | 1.160056 | 7.72E-06 | hypermethylated |
| cg17750959 | 0.12026 | 0.268720541 | 1.15995  | 0.000417 | hypermethylated |
| cg02350677 | 0.13661 | 0.305252432 | 1.15994  | 6.15E-05 | hypermethylated |
| cg18694169 | 0.12997 | 0.290383243 | 1.15978  | 4.47E-05 | hypermethylated |
| cg20747266 | 0.16119 | 0.35998     | 1.159155 | 1.73E-05 | hypermethylated |
| cg11199046 | 0.16825 | 0.375692973 | 1.158948 | 1.35E-05 | hypermethylated |
| cg06092815 | 0.16906 | 0.377390811 | 1.158524 | 6.01E-05 | hypermethylated |
| cg10997479 | 0.16118 | 0.359708649 | 1.158156 | 4.80E-06 | hypermethylated |
| cg14098847 | 0.20613 | 0.460011892 | 1.158117 | 1.35E-05 | hypermethylated |
| cg18988498 | 0.22677 | 0.506062703 | 1.158086 | 5.14E-06 | hypermethylated |
| cg21475402 | 0.20161 | 0.449883243 | 1.157983 | 1.54E-05 | hypermethylated |
| cg03563630 | 0.16325 | 0.364249189 | 1.157843 | 6.38E-05 | hypermethylated |
| cg02519751 | 0.27831 | 0.620951892 | 1.157789 | 7.12E-06 | hypermethylated |
| cg07544187 | 0.18666 | 0.416452432 | 1.157739 | 0.000109 | hypermethylated |
| cg09187933 | 0.13583 | 0.302997838 | 1.157505 | 0.000229 | hypermethylated |
| cg22274813 | 0.18854 | 0.420534595 | 1.157354 | 1.75E-05 | hypermethylated |
| cg22640819 | 0.15204 | 0.339027027 | 1.156949 | 0.000132 | hypermethylated |
| cg06410057 | 0.16663 | 0.371530811 | 1.156834 | 6.62E-05 | hypermethylated |

|            |         |             |          |          |                 |
|------------|---------|-------------|----------|----------|-----------------|
| cg05413872 | 0.11643 | 0.259598919 | 1.156822 | 6.78E-05 | hypermethylated |
| cg11501236 | 0.1308  | 0.29163027  | 1.156778 | 0.000195 | hypermethylated |
| cg18021368 | 0.15709 | 0.350224324 | 1.156688 | 4.05E-05 | hypermethylated |
| cg26446499 | 0.16935 | 0.377550811 | 1.156663 | 1.99E-05 | hypermethylated |
| cg13722123 | 0.1194  | 0.266171892 | 1.156555 | 3.67E-05 | hypermethylated |
| cg06717850 | 0.20377 | 0.4542      | 1.156386 | 5.14E-06 | hypermethylated |
| cg22795586 | 0.28338 | 0.631646486 | 1.156379 | 6.22E-06 | hypermethylated |
| cg03951603 | 0.20279 | 0.451976757 | 1.156262 | 4.82E-05 | hypermethylated |
| cg16651126 | 0.19527 | 0.435207568 | 1.156233 | 1.15E-05 | hypermethylated |
| cg25106913 | 0.10727 | 0.239071351 | 1.156195 | 5.19E-05 | hypermethylated |
| cg04598121 | 0.1787  | 0.398252432 | 1.156144 | 9.69E-06 | hypermethylated |
| cg04611203 | 0.15336 | 0.341774595 | 1.156123 | 4.70E-05 | hypermethylated |
| cg03193589 | 0.18896 | 0.42109027  | 1.156049 | 3.23E-05 | hypermethylated |
| cg01532436 | 0.19381 | 0.431850811 | 1.15589  | 0.000931 | hypermethylated |
| cg22812955 | 0.13572 | 0.302298919 | 1.155342 | 1.67E-06 | hypermethylated |
| cg24924958 | 0.17751 | 0.395376757 | 1.155328 | 4.05E-05 | hypermethylated |
| cg03998104 | 0.13548 | 0.301757297 | 1.155309 | 4.67E-06 | hypermethylated |
| cg24594454 | 0.15737 | 0.350495676 | 1.155236 | 0.000327 | hypermethylated |
| cg01497613 | 0.14281 | 0.318057838 | 1.155192 | 1.39E-05 | hypermethylated |
| cg11199713 | 0.15676 | 0.349080541 | 1.155002 | 8.15E-06 | hypermethylated |
| cg12382153 | 0.15698 | 0.349567568 | 1.154991 | 0.000163 | hypermethylated |
| cg01856162 | 0.20609 | 0.458917838 | 1.154961 | 6.31E-05 | hypermethylated |
| cg25353171 | 0.1838  | 0.409258919 | 1.154877 | 1.73E-05 | hypermethylated |
| cg00563824 | 0.21486 | 0.478361081 | 1.154703 | 0.000174 | hypermethylated |
| cg03828874 | 0.15739 | 0.350407568 | 1.15469  | 7.41E-06 | hypermethylated |
| cg05965288 | 0.15847 | 0.352799459 | 1.154639 | 3.67E-05 | hypermethylated |
| cg02976699 | 0.10807 | 0.240574054 | 1.154515 | 0.000174 | hypermethylated |
| cg24249411 | 0.1539  | 0.342583243 | 1.154461 | 1.06E-05 | hypermethylated |
| cg17477162 | 0.16439 | 0.36592     | 1.154406 | 0.000219 | hypermethylated |
| cg10588470 | 0.10856 | 0.241602703 | 1.154144 | 8.42E-05 | hypermethylated |
| cg01944655 | 0.1716  | 0.381824865 | 1.153862 | 0.000142 | hypermethylated |
| cg19851594 | 0.14085 | 0.313389189 | 1.153796 | 0.000221 | hypermethylated |
| cg04778012 | 0.22399 | 0.498371351 | 1.153787 | 1.54E-05 | hypermethylated |
| cg10097295 | 0.12304 | 0.273727568 | 1.153613 | 0.000265 | hypermethylated |
| cg21564242 | 0.09341 | 0.207798378 | 1.153535 | 1.35E-05 | hypermethylated |
| cg26257822 | 0.13748 | 0.305753514 | 1.153147 | 2.32E-05 | hypermethylated |
| cg04851268 | 0.18741 | 0.416791351 | 1.153127 | 5.86E-05 | hypermethylated |
| cg00914726 | 0.18398 | 0.408966486 | 1.152434 | 4.64E-05 | hypermethylated |
| cg09866983 | 0.16094 | 0.357747027 | 1.152417 | 1.58E-05 | hypermethylated |
| cg27234067 | 0.20771 | 0.461642162 | 1.152204 | 1.46E-05 | hypermethylated |
| cg21355828 | 0.22178 | 0.492883243 | 1.152117 | 4.48E-06 | hypermethylated |
| cg00197517 | 0.15483 | 0.344       | 1.151724 | 0.000262 | hypermethylated |
| cg25744613 | 0.16536 | 0.367362162 | 1.151593 | 0.000245 | hypermethylated |
| cg10603004 | 0.16439 | 0.365174054 | 1.151462 | 1.15E-05 | hypermethylated |
| cg12544191 | 0.19596 | 0.435098378 | 1.150782 | 3.69E-06 | hypermethylated |
| cg23619399 | 0.21282 | 0.472529189 | 1.15077  | 3.81E-05 | hypermethylated |
| cg07950000 | 0.12174 | 0.270285946 | 1.150683 | 0.0002   | hypermethylated |
| cg14421192 | 0.14803 | 0.328638378 | 1.150611 | 1.25E-05 | hypermethylated |
| cg16821446 | 0.13752 | 0.305304324 | 1.150607 | 5.35E-06 | hypermethylated |
| cg10717463 | 0.15169 | 0.336698919 | 1.150333 | 6.57E-06 | hypermethylated |
| cg23096689 | 0.14748 | 0.327255135 | 1.149897 | 4.82E-05 | hypermethylated |
| cg12385599 | 0.13582 | 0.301370811 | 1.149844 | 0.000408 | hypermethylated |
| cg04088697 | 0.16007 | 0.355166486 | 1.149793 | 1.04E-05 | hypermethylated |
| cg16650901 | 0.13708 | 0.304131351 | 1.149676 | 6.15E-05 | hypermethylated |
| cg08196032 | 0.15493 | 0.343686486 | 1.149477 | 7.65E-05 | hypermethylated |
| cg10841552 | 0.15358 | 0.340651351 | 1.149306 | 1.58E-05 | hypermethylated |
| cg27302539 | 0.14263 | 0.316302703 | 1.149028 | 0.000219 | hypermethylated |
| cg01106926 | 0.17972 | 0.398413514 | 1.148516 | 6.22E-06 | hypermethylated |

|            |         |             |          |          |                 |
|------------|---------|-------------|----------|----------|-----------------|
| cg12173558 | 0.16289 | 0.36109027  | 1.148462 | 3.90E-05 | hypermethylated |
| cg16498194 | 0.20999 | 0.465412973 | 1.148191 | 3.12E-06 | hypermethylated |
| cg23954268 | 0.12857 | 0.284947027 | 1.14814  | 2.10E-05 | hypermethylated |
| cg00745389 | 0.14468 | 0.320558378 | 1.147722 | 5.72E-05 | hypermethylated |
| cg18063312 | 0.19897 | 0.440838378 | 1.147699 | 3.00E-05 | hypermethylated |
| cg25097497 | 0.13359 | 0.295981622 | 1.147696 | 4.15E-05 | hypermethylated |
| cg01295392 | 0.20316 | 0.450054595 | 1.147484 | 5.00E-06 | hypermethylated |
| cg14512346 | 0.13094 | 0.29006     | 1.147445 | 8.63E-05 | hypermethylated |
| cg25928819 | 0.18039 | 0.399418378 | 1.146781 | 1.64E-05 | hypermethylated |
| cg16419235 | 0.15824 | 0.350345946 | 1.146666 | 2.78E-05 | hypermethylated |
| cg04996277 | 0.14896 | 0.329781622 | 1.146586 | 6.01E-05 | hypermethylated |
| cg27659049 | 0.26037 | 0.57636973  | 1.146431 | 8.37E-06 | hypermethylated |
| cg10785263 | 0.17044 | 0.377283243 | 1.146384 | 4.70E-05 | hypermethylated |
| cg24100636 | 0.17686 | 0.391352432 | 1.145861 | 0.000313 | hypermethylated |
| cg22392666 | 0.15045 | 0.332890811 | 1.145765 | 0.000506 | hypermethylated |
| cg00258597 | 0.1264  | 0.279614054 | 1.14544  | 3.19E-05 | hypermethylated |
| cg18673377 | 0.16755 | 0.370628108 | 1.145381 | 1.71E-05 | hypermethylated |
| cg14425564 | 0.17195 | 0.380263243 | 1.145009 | 0.000417 | hypermethylated |
| cg22633280 | 0.15717 | 0.347555676 | 1.144918 | 0.000626 | hypermethylated |
| cg24061208 | 0.16753 | 0.370452432 | 1.144869 | 0.000154 | hypermethylated |
| cg11044575 | 0.15719 | 0.347547027 | 1.144699 | 4.05E-05 | hypermethylated |
| cg01213381 | 0.15615 | 0.345091351 | 1.144046 | 0.000102 | hypermethylated |
| cg06634914 | 0.18131 | 0.400643784 | 1.143862 | 7.29E-05 | hypermethylated |
| cg06001519 | 0.20976 | 0.463476216 | 1.143756 | 1.66E-05 | hypermethylated |
| cg09403666 | 0.21214 | 0.468650811 | 1.143497 | 3.00E-05 | hypermethylated |
| cg04630271 | 0.12676 | 0.280028649 | 1.143475 | 2.05E-06 | hypermethylated |
| cg09565079 | 0.11889 | 0.262628108 | 1.143394 | 7.65E-05 | hypermethylated |
| cg19819837 | 0.13325 | 0.294331351 | 1.143306 | 7.62E-06 | hypermethylated |
| cg24719321 | 0.19139 | 0.422754054 | 1.143303 | 3.49E-06 | hypermethylated |
| cg26465391 | 0.18777 | 0.414720541 | 1.143173 | 1.66E-05 | hypermethylated |
| cg07315858 | 0.13619 | 0.300765946 | 1.14302  | 1.35E-05 | hypermethylated |
| cg04445871 | 0.13935 | 0.307463243 | 1.141701 | 1.89E-05 | hypermethylated |
| cg04553690 | 0.18263 | 0.402897297 | 1.141488 | 2.23E-06 | hypermethylated |
| cg08136772 | 0.19032 | 0.419857297 | 1.141472 | 1.12E-05 | hypermethylated |
| cg03053579 | 0.14708 | 0.324371892 | 1.141048 | 3.57E-05 | hypermethylated |
| cg09415754 | 0.18405 | 0.405840541 | 1.140815 | 1.45E-06 | hypermethylated |
| cg16325502 | 0.14608 | 0.322111892 | 1.140803 | 1.39E-05 | hypermethylated |
| cg14654613 | 0.18647 | 0.411165946 | 1.140777 | 6.95E-05 | hypermethylated |
| cg11228126 | 0.14312 | 0.315512973 | 1.140474 | 1.89E-05 | hypermethylated |
| cg09731996 | 0.15392 | 0.339304324 | 1.140399 | 6.54E-05 | hypermethylated |
| cg13946538 | 0.14889 | 0.328196757 | 1.140314 | 1.54E-05 | hypermethylated |
| cg09614300 | 0.16813 | 0.370543784 | 1.140067 | 2.32E-05 | hypermethylated |
| cg26520012 | 0.16325 | 0.359745405 | 1.139893 | 0.00035  | hypermethylated |
| cg03355526 | 0.16538 | 0.364430811 | 1.13986  | 1.33E-05 | hypermethylated |
| cg21269934 | 0.12156 | 0.26784973  | 1.139755 | 0.000464 | hypermethylated |
| cg16151151 | 0.13472 | 0.296841081 | 1.139727 | 5.79E-05 | hypermethylated |
| cg00511674 | 0.15609 | 0.343907568 | 1.139643 | 0.000147 | hypermethylated |
| cg22511262 | 0.11091 | 0.244331892 | 1.139453 | 3.67E-05 | hypermethylated |
| cg13478928 | 0.17436 | 0.384051892 | 1.139232 | 2.13E-05 | hypermethylated |
| cg01914153 | 0.11037 | 0.243043784 | 1.138868 | 1.64E-05 | hypermethylated |
| cg00794881 | 0.11574 | 0.254838919 | 1.138698 | 7.65E-05 | hypermethylated |
| cg01573321 | 0.2108  | 0.464098378 | 1.138556 | 0.000588 | hypermethylated |
| cg18470295 | 0.14156 | 0.311636216 | 1.138449 | 0.00017  | hypermethylated |
| cg07099161 | 0.12017 | 0.264544865 | 1.138436 | 1.63E-06 | hypermethylated |
| cg03400421 | 0.16721 | 0.368095676 | 1.13842  | 2.10E-05 | hypermethylated |
| cg20403938 | 0.17038 | 0.375035135 | 1.13827  | 5.06E-05 | hypermethylated |
| cg04571163 | 0.13952 | 0.307094054 | 1.138209 | 1.17E-05 | hypermethylated |
| cg08332074 | 0.19284 | 0.424446486 | 1.138178 | 6.46E-05 | hypermethylated |

|            |         |             |          |          |                 |
|------------|---------|-------------|----------|----------|-----------------|
| cg24549277 | 0.19851 | 0.436772973 | 1.137672 | 1.09E-05 | hypermethylated |
| cg02723395 | 0.16329 | 0.359247568 | 1.137542 | 2.10E-05 | hypermethylated |
| cg09180848 | 0.156   | 0.343180541 | 1.137422 | 2.21E-05 | hypermethylated |
| cg06410537 | 0.18531 | 0.407655676 | 1.13741  | 4.73E-06 | hypermethylated |
| cg04339613 | 0.16344 | 0.359531351 | 1.137356 | 1.09E-05 | hypermethylated |
| cg16135698 | 0.13854 | 0.304737838 | 1.137266 | 3.40E-05 | hypermethylated |
| cg10237044 | 0.11953 | 0.262917297 | 1.137236 | 1.64E-05 | hypermethylated |
| cg19224201 | 0.15178 | 0.333825946 | 1.137114 | 0.000142 | hypermethylated |
| cg15431544 | 0.14447 | 0.317735135 | 1.137055 | 7.62E-06 | hypermethylated |
| cg06697536 | 0.16058 | 0.353111892 | 1.136833 | 0.000517 | hypermethylated |
| cg21914290 | 0.23851 | 0.524464865 | 1.136796 | 3.67E-05 | hypermethylated |
| cg00893471 | 0.1399  | 0.307625946 | 1.136781 | 9.60E-05 | hypermethylated |
| cg00831710 | 0.20936 | 0.460218919 | 1.136334 | 1.14E-05 | hypermethylated |
| cg14894848 | 0.18542 | 0.407585405 | 1.136306 | 8.26E-06 | hypermethylated |
| cg14269973 | 0.15687 | 0.344785405 | 1.136129 | 0.000166 | hypermethylated |
| cg19411025 | 0.14407 | 0.316607568 | 1.135926 | 2.21E-05 | hypermethylated |
| cg00500229 | 0.17538 | 0.385366486 | 1.135747 | 8.84E-05 | hypermethylated |
| cg27232145 | 0.17442 | 0.383214054 | 1.135585 | 1.48E-05 | hypermethylated |
| cg14810013 | 0.12349 | 0.271295135 | 1.135469 | 0.000145 | hypermethylated |
| cg08620606 | 0.11839 | 0.260088108 | 1.135453 | 3.95E-05 | hypermethylated |
| cg00911351 | 0.17885 | 0.392824865 | 1.135136 | 1.33E-06 | hypermethylated |
| cg18335607 | 0.12197 | 0.267858919 | 1.134947 | 0.000224 | hypermethylated |
| cg12665460 | 0.15857 | 0.348091351 | 1.134346 | 1.52E-05 | hypermethylated |
| cg22287492 | 0.1591  | 0.349237838 | 1.134276 | 0.000191 | hypermethylated |
| cg12699371 | 0.1315  | 0.28865027  | 1.13426  | 7.74E-05 | hypermethylated |
| cg13193455 | 0.15577 | 0.341865405 | 1.134011 | 3.32E-05 | hypermethylated |
| cg03711485 | 0.25409 | 0.557596216 | 1.133881 | 3.49E-06 | hypermethylated |
| cg25271672 | 0.1192  | 0.261555135 | 1.133731 | 2.10E-06 | hypermethylated |
| cg13365752 | 0.15199 | 0.333403784 | 1.133294 | 0.00012  | hypermethylated |
| cg06108782 | 0.13211 | 0.289788649 | 1.133261 | 7.83E-06 | hypermethylated |
| cg23917057 | 0.14728 | 0.322912432 | 1.132581 | 1.40E-05 | hypermethylated |
| cg15007156 | 0.18351 | 0.402294595 | 1.132394 | 8.22E-05 | hypermethylated |
| cg24842733 | 0.15069 | 0.330312432 | 1.132248 | 0.000142 | hypermethylated |
| cg16038120 | 0.21142 | 0.463358378 | 1.132017 | 0.000174 | hypermethylated |
| cg08400962 | 0.18881 | 0.413797297 | 1.131989 | 1.97E-05 | hypermethylated |
| cg27112264 | 0.14708 | 0.322254054 | 1.131597 | 0.000109 | hypermethylated |
| cg12432010 | 0.16893 | 0.370005405 | 1.131121 | 8.63E-05 | hypermethylated |
| cg05842480 | 0.13889 | 0.304205946 | 1.131106 | 0.000207 | hypermethylated |
| cg20792062 | 0.17686 | 0.387331351 | 1.13096  | 5.32E-05 | hypermethylated |
| cg12545687 | 0.16656 | 0.364722162 | 1.130756 | 3.15E-05 | hypermethylated |
| cg14161359 | 0.17946 | 0.392961622 | 1.130726 | 6.54E-05 | hypermethylated |
| cg21328033 | 0.19836 | 0.434345946 | 1.130723 | 2.39E-05 | hypermethylated |
| cg26425305 | 0.18284 | 0.400177838 | 1.13006  | 3.35E-06 | hypermethylated |
| cg08697503 | 0.13031 | 0.285103243 | 1.129537 | 4.47E-05 | hypermethylated |
| cg04542030 | 0.13303 | 0.291028108 | 1.129407 | 7.20E-05 | hypermethylated |
| cg20270188 | 0.18611 | 0.407138378 | 1.129364 | 7.52E-06 | hypermethylated |
| cg02497758 | 0.14651 | 0.320494054 | 1.129298 | 0.000226 | hypermethylated |
| cg09169953 | 0.12177 | 0.266352973 | 1.129181 | 1.26E-05 | hypermethylated |
| cg27659903 | 0.15859 | 0.34689027  | 1.129178 | 8.03E-05 | hypermethylated |
| cg19215671 | 0.15628 | 0.341825946 | 1.129129 | 3.67E-05 | hypermethylated |
| cg08239858 | 0.21228 | 0.4642      | 1.128778 | 6.39E-06 | hypermethylated |
| cg05143633 | 0.14755 | 0.322638378 | 1.128714 | 3.15E-05 | hypermethylated |
| cg12857945 | 0.16456 | 0.359825405 | 1.128683 | 2.10E-05 | hypermethylated |
| cg02757432 | 0.17203 | 0.376040541 | 1.128228 | 1.68E-05 | hypermethylated |
| cg03511041 | 0.15404 | 0.336664865 | 1.128008 | 8.84E-05 | hypermethylated |
| cg14112075 | 0.13324 | 0.291175135 | 1.12786  | 0.000117 | hypermethylated |
| cg15444648 | 0.14201 | 0.310322703 | 1.127777 | 4.58E-05 | hypermethylated |
| cg18298920 | 0.20307 | 0.443713514 | 1.127651 | 4.36E-06 | hypermethylated |

|            |         |             |          |          |                 |
|------------|---------|-------------|----------|----------|-----------------|
| cg23397578 | 0.11454 | 0.250271351 | 1.127642 | 0.00017  | hypermethylated |
| cg06151243 | 0.16862 | 0.368372973 | 1.127392 | 1.25E-05 | hypermethylated |
| cg20703997 | 0.20002 | 0.436903784 | 1.127171 | 1.66E-05 | hypermethylated |
| cg10397765 | 0.18683 | 0.407970811 | 1.12674  | 0.00064  | hypermethylated |
| cg13794993 | 0.14371 | 0.313803243 | 1.1267   | 1.15E-05 | hypermethylated |
| cg14323675 | 0.18003 | 0.393071892 | 1.126556 | 2.39E-05 | hypermethylated |
| cg12440258 | 0.17742 | 0.38732973  | 1.126394 | 2.27E-05 | hypermethylated |
| cg24813176 | 0.14988 | 0.327197838 | 1.126355 | 9.72E-05 | hypermethylated |
| cg10900455 | 0.17138 | 0.374048108 | 1.126025 | 1.18E-05 | hypermethylated |
| cg25214093 | 0.12783 | 0.278925946 | 1.125656 | 8.84E-05 | hypermethylated |
| cg11220245 | 0.19862 | 0.433362162 | 1.125562 | 8.60E-06 | hypermethylated |
| cg20711812 | 0.2067  | 0.450984865 | 1.125541 | 8.60E-06 | hypermethylated |
| cg14872952 | 0.17842 | 0.389227568 | 1.125337 | 0.000382 | hypermethylated |
| cg07423205 | 0.1621  | 0.353608108 | 1.125267 | 8.95E-06 | hypermethylated |
| cg20359994 | 0.15893 | 0.346615676 | 1.124945 | 2.32E-05 | hypermethylated |
| cg18592174 | 0.16518 | 0.360223784 | 1.124854 | 3.30E-06 | hypermethylated |
| cg13102079 | 0.14539 | 0.317008649 | 1.124594 | 8.84E-05 | hypermethylated |
| cg10286380 | 0.17828 | 0.388703784 | 1.124526 | 3.23E-05 | hypermethylated |
| cg27265170 | 0.17356 | 0.378350811 | 1.12429  | 1.75E-05 | hypermethylated |
| cg04874129 | 0.14492 | 0.315908649 | 1.124251 | 3.15E-05 | hypermethylated |
| cg06551997 | 0.16641 | 0.362719459 | 1.124112 | 0.000148 | hypermethylated |
| cg08475379 | 0.1615  | 0.352001081 | 1.124046 | 1.42E-05 | hypermethylated |
| cg08815081 | 0.17903 | 0.390202703 | 1.124022 | 8.60E-06 | hypermethylated |
| cg26647617 | 0.14677 | 0.31989027  | 1.12402  | 1.06E-05 | hypermethylated |
| cg07441518 | 0.23387 | 0.509685405 | 1.1239   | 7.20E-07 | hypermethylated |
| cg05639205 | 0.18542 | 0.403848649 | 1.123018 | 1.45E-06 | hypermethylated |
| cg19248676 | 0.1227  | 0.267237297 | 1.122986 | 6.62E-05 | hypermethylated |
| cg20300343 | 0.22931 | 0.499390811 | 1.12287  | 1.09E-05 | hypermethylated |
| cg10456990 | 0.14158 | 0.308329189 | 1.122854 | 8.71E-06 | hypermethylated |
| cg21908557 | 0.15202 | 0.331026486 | 1.122686 | 0.000182 | hypermethylated |
| cg05652533 | 0.16464 | 0.358432973 | 1.122388 | 2.27E-05 | hypermethylated |
| cg16424078 | 0.15671 | 0.341141622 | 1.122274 | 2.15E-05 | hypermethylated |
| cg05678749 | 0.19557 | 0.425718378 | 1.122214 | 3.04E-05 | hypermethylated |
| cg13186884 | 0.14369 | 0.312775676 | 1.122169 | 3.44E-05 | hypermethylated |
| cg13802013 | 0.19032 | 0.414262162 | 1.122117 | 2.79E-06 | hypermethylated |
| cg04606861 | 0.1711  | 0.372396757 | 1.122001 | 1.62E-05 | hypermethylated |
| cg20885782 | 0.17196 | 0.374248649 | 1.121924 | 1.39E-05 | hypermethylated |
| cg17446371 | 0.10498 | 0.228438919 | 1.121694 | 4.20E-05 | hypermethylated |
| cg15837212 | 0.1653  | 0.359687027 | 1.121655 | 8.15E-06 | hypermethylated |
| cg21287054 | 0.1732  | 0.376872973 | 1.121639 | 0.000733 | hypermethylated |
| cg23475371 | 0.11037 | 0.24015027  | 1.121589 | 5.38E-05 | hypermethylated |
| cg24767540 | 0.16691 | 0.363128649 | 1.12141  | 0.000107 | hypermethylated |
| cg24080008 | 0.22857 | 0.497125405 | 1.120974 | 4.48E-06 | hypermethylated |
| cg23897749 | 0.16106 | 0.350258378 | 1.120821 | 3.76E-05 | hypermethylated |
| cg19101547 | 0.14932 | 0.324639459 | 1.120431 | 0.000172 | hypermethylated |
| cg15145341 | 0.23494 | 0.510716757 | 1.120231 | 1.11E-05 | hypermethylated |
| cg04974130 | 0.1305  | 0.283641081 | 1.120017 | 1.38E-05 | hypermethylated |
| cg02161900 | 0.1549  | 0.336659459 | 1.119953 | 3.36E-05 | hypermethylated |
| cg06563089 | 0.23057 | 0.501118378 | 1.119947 | 2.05E-06 | hypermethylated |
| cg06959142 | 0.13957 | 0.303304324 | 1.119777 | 1.54E-05 | hypermethylated |
| cg11571585 | 0.16055 | 0.348856757 | 1.119612 | 0.000931 | hypermethylated |
| cg09071155 | 0.16534 | 0.359257838 | 1.119584 | 2.15E-05 | hypermethylated |
| cg09234616 | 0.20387 | 0.442857297 | 1.119192 | 0.000109 | hypermethylated |
| cg03586879 | 0.13746 | 0.298578919 | 1.1191   | 3.57E-05 | hypermethylated |
| cg08078137 | 0.10053 | 0.218277838 | 1.11854  | 6.95E-05 | hypermethylated |
| cg25318296 | 0.14216 | 0.308666486 | 1.118533 | 0.000112 | hypermethylated |
| cg24603408 | 0.20797 | 0.451504324 | 1.118364 | 9.27E-05 | hypermethylated |
| cg15105206 | 0.12344 | 0.267987027 | 1.118353 | 1.40E-05 | hypermethylated |

|            |         |             |          |          |                 |
|------------|---------|-------------|----------|----------|-----------------|
| cg14794043 | 0.15818 | 0.343346486 | 1.118098 | 9.05E-05 | hypermethylated |
| cg08837627 | 0.1944  | 0.421933514 | 1.117987 | 4.70E-05 | hypermethylated |
| cg20402783 | 0.21149 | 0.458971892 | 1.117816 | 0.000115 | hypermethylated |
| cg18111119 | 0.14756 | 0.320229189 | 1.117803 | 3.00E-05 | hypermethylated |
| cg18277979 | 0.16271 | 0.353090811 | 1.117736 | 5.06E-05 | hypermethylated |
| cg04355159 | 0.12764 | 0.276972973 | 1.117665 | 3.49E-05 | hypermethylated |
| cg06163425 | 0.18789 | 0.407697838 | 1.117612 | 4.70E-05 | hypermethylated |
| cg05131483 | 0.19498 | 0.423072973 | 1.11758  | 1.46E-05 | hypermethylated |
| cg06383163 | 0.19926 | 0.432318919 | 1.117444 | 4.70E-05 | hypermethylated |
| cg09141965 | 0.19294 | 0.418581081 | 1.117355 | 8.37E-06 | hypermethylated |
| cg24072202 | 0.16939 | 0.367365405 | 1.116867 | 9.82E-06 | hypermethylated |
| cg09168808 | 0.2198  | 0.476631892 | 1.116684 | 5.89E-06 | hypermethylated |
| cg11169641 | 0.1493  | 0.323715135 | 1.116511 | 2.18E-05 | hypermethylated |
| cg20887073 | 0.15519 | 0.336453514 | 1.116372 | 8.60E-06 | hypermethylated |
| cg14664621 | 0.13707 | 0.297151351 | 1.116285 | 5.00E-05 | hypermethylated |
| cg00811065 | 0.20349 | 0.441090811 | 1.116118 | 1.62E-05 | hypermethylated |
| cg09498572 | 0.1632  | 0.353695676 | 1.115868 | 4.64E-05 | hypermethylated |
| cg19034038 | 0.15685 | 0.339885405 | 1.115663 | 6.01E-05 | hypermethylated |
| cg20731937 | 0.1914  | 0.414734054 | 1.115596 | 0.000262 | hypermethylated |
| cg01294808 | 0.26359 | 0.571041622 | 1.1153   | 9.66E-07 | hypermethylated |
| cg26267388 | 0.1614  | 0.349622162 | 1.115156 | 8.83E-06 | hypermethylated |
| cg07388347 | 0.1927  | 0.417385946 | 1.115025 | 2.27E-05 | hypermethylated |
| cg02722596 | 0.24264 | 0.525443243 | 1.114718 | 3.00E-05 | hypermethylated |
| cg04745161 | 0.13838 | 0.299501622 | 1.113928 | 9.95E-05 | hypermethylated |
| cg03697918 | 0.20697 | 0.447768649 | 1.113332 | 4.58E-05 | hypermethylated |
| cg14724471 | 0.16945 | 0.366539459 | 1.113109 | 9.31E-06 | hypermethylated |
| cg14554491 | 0.15542 | 0.336177838 | 1.113052 | 0.000268 | hypermethylated |
| cg00457403 | 0.203   | 0.439091351 | 1.113041 | 6.78E-05 | hypermethylated |
| cg03943081 | 0.14071 | 0.304342703 | 1.112972 | 2.92E-05 | hypermethylated |
| cg03086857 | 0.1267  | 0.274038919 | 1.112964 | 0.000256 | hypermethylated |
| cg26106948 | 0.17218 | 0.37236     | 1.112781 | 0.000126 | hypermethylated |
| cg26195829 | 0.18412 | 0.398073514 | 1.112389 | 0.000283 | hypermethylated |
| cg11511795 | 0.15415 | 0.33325027  | 1.112271 | 9.60E-05 | hypermethylated |
| cg09784934 | 0.14491 | 0.313222703 | 1.112032 | 1.73E-05 | hypermethylated |
| cg21277243 | 0.15349 | 0.331764324 | 1.112014 | 1.52E-05 | hypermethylated |
| cg14270687 | 0.20855 | 0.450557297 | 1.111317 | 1.46E-05 | hypermethylated |
| cg06079106 | 0.16441 | 0.35516973  | 1.111211 | 1.87E-05 | hypermethylated |
| cg11638298 | 0.1703  | 0.367892432 | 1.111206 | 1.18E-05 | hypermethylated |
| cg15473084 | 0.14495 | 0.31307027  | 1.110931 | 1.89E-05 | hypermethylated |
| cg01503065 | 0.14972 | 0.323314054 | 1.110669 | 7.72E-06 | hypermethylated |
| cg12884406 | 0.11069 | 0.239010811 | 1.110551 | 8.63E-05 | hypermethylated |
| cg09275667 | 0.13041 | 0.281571892 | 1.110449 | 0.0003   | hypermethylated |
| cg06132283 | 0.11156 | 0.240864324 | 1.110401 | 0.000104 | hypermethylated |
| cg22752533 | 0.20888 | 0.450971351 | 1.110361 | 3.00E-05 | hypermethylated |
| cg05433039 | 0.10801 | 0.233169189 | 1.110212 | 0.000204 | hypermethylated |
| cg06365303 | 0.21319 | 0.460193514 | 1.110101 | 9.57E-06 | hypermethylated |
| cg14395298 | 0.24266 | 0.523772432 | 1.110004 | 9.16E-05 | hypermethylated |
| cg23250574 | 0.16422 | 0.354455135 | 1.109973 | 0.000123 | hypermethylated |
| cg08036309 | 0.21528 | 0.464623243 | 1.109847 | 9.82E-06 | hypermethylated |
| cg25121513 | 0.17953 | 0.387443784 | 1.109762 | 1.71E-05 | hypermethylated |
| cg04549162 | 0.17322 | 0.373795676 | 1.109644 | 4.26E-05 | hypermethylated |
| cg05942128 | 0.14528 | 0.313447568 | 1.109388 | 5.07E-06 | hypermethylated |
| cg17617843 | 0.19171 | 0.413603243 | 1.109322 | 0.000234 | hypermethylated |
| cg11909748 | 0.21121 | 0.455671351 | 1.109316 | 8.37E-06 | hypermethylated |
| cg05843457 | 0.19496 | 0.420588649 | 1.109232 | 0.000426 | hypermethylated |
| cg23395449 | 0.15049 | 0.324623243 | 1.109099 | 7.12E-05 | hypermethylated |
| cg09408098 | 0.13786 | 0.297262162 | 1.108532 | 0.000142 | hypermethylated |
| cg08677617 | 0.18895 | 0.407374595 | 1.108351 | 0.000147 | hypermethylated |

|            |         |             |          |          |                 |
|------------|---------|-------------|----------|----------|-----------------|
| cg17833265 | 0.18486 | 0.398508649 | 1.108178 | 9.82E-06 | hypermethylated |
| cg07116997 | 0.14773 | 0.318461622 | 1.108157 | 5.58E-05 | hypermethylated |
| cg03314029 | 0.20738 | 0.446972973 | 1.107911 | 0.001052 | hypermethylated |
| cg07867924 | 0.08054 | 0.173557838 | 1.107639 | 1.94E-05 | hypermethylated |
| cg14958635 | 0.1784  | 0.384424324 | 1.107584 | 4.58E-05 | hypermethylated |
| cg05422049 | 0.18584 | 0.400449189 | 1.107558 | 5.25E-05 | hypermethylated |
| cg06275859 | 0.18594 | 0.400608649 | 1.107356 | 7.93E-06 | hypermethylated |
| cg20725013 | 0.16332 | 0.351869189 | 1.107338 | 3.15E-05 | hypermethylated |
| cg08977371 | 0.13729 | 0.295720541 | 1.107008 | 1.12E-05 | hypermethylated |
| cg02006615 | 0.16148 | 0.347782703 | 1.106831 | 9.49E-05 | hypermethylated |
| cg01007828 | 0.14952 | 0.322014595 | 1.106788 | 1.46E-05 | hypermethylated |
| cg21643178 | 0.19324 | 0.416030811 | 1.106297 | 1.93E-06 | hypermethylated |
| cg26236177 | 0.1988  | 0.427968108 | 1.106186 | 0.000126 | hypermethylated |
| cg13777292 | 0.1887  | 0.40618     | 1.106025 | 0.000174 | hypermethylated |
| cg08813349 | 0.13651 | 0.293834054 | 1.105995 | 7.93E-05 | hypermethylated |
| cg00553149 | 0.17222 | 0.370648108 | 1.105797 | 9.19E-06 | hypermethylated |
| cg13197216 | 0.13785 | 0.296665405 | 1.105737 | 6.15E-05 | hypermethylated |
| cg07138452 | 0.13191 | 0.283835135 | 1.105499 | 0.000268 | hypermethylated |
| cg13705391 | 0.14847 | 0.319456216 | 1.105447 | 0.000176 | hypermethylated |
| cg00319168 | 0.15388 | 0.331042162 | 1.105209 | 4.76E-05 | hypermethylated |
| cg11111460 | 0.17769 | 0.382148108 | 1.104769 | 7.84E-05 | hypermethylated |
| cg12718339 | 0.13489 | 0.290085405 | 1.104694 | 2.54E-05 | hypermethylated |
| cg07066550 | 0.17517 | 0.376657838 | 1.104499 | 0.000135 | hypermethylated |
| cg14273116 | 0.16037 | 0.344822703 | 1.10445  | 4.60E-06 | hypermethylated |
| cg09896412 | 0.14359 | 0.308741622 | 1.104445 | 0.000268 | hypermethylated |
| cg18799510 | 0.12175 | 0.261752973 | 1.104284 | 2.10E-05 | hypermethylated |
| cg14994060 | 0.14816 | 0.318498378 | 1.10413  | 4.15E-05 | hypermethylated |
| cg06695663 | 0.16785 | 0.36079027  | 1.103988 | 0.000163 | hypermethylated |
| cg03160135 | 0.1298  | 0.278997838 | 1.103964 | 2.32E-05 | hypermethylated |
| cg02800810 | 0.19249 | 0.413706486 | 1.103824 | 9.31E-06 | hypermethylated |
| cg18232816 | 0.13976 | 0.300308108 | 1.103492 | 6.78E-05 | hypermethylated |
| cg19063061 | 0.1869  | 0.401431351 | 1.102887 | 0.00039  | hypermethylated |
| cg17795158 | 0.1758  | 0.377531351 | 1.102661 | 0.000143 | hypermethylated |
| cg18181201 | 0.17432 | 0.374252432 | 1.102274 | 7.65E-05 | hypermethylated |
| cg15989068 | 0.18003 | 0.386468649 | 1.102114 | 1.06E-05 | hypermethylated |
| cg01287975 | 0.1938  | 0.415963784 | 1.101889 | 0.000224 | hypermethylated |
| cg04849842 | 0.2105  | 0.451767568 | 1.10176  | 0.000306 | hypermethylated |
| cg13413955 | 0.21753 | 0.466697297 | 1.101273 | 4.48E-06 | hypermethylated |
| cg03609666 | 0.16903 | 0.362634054 | 1.101235 | 0.000435 | hypermethylated |
| cg02332525 | 0.17431 | 0.373934595 | 1.101131 | 7.62E-06 | hypermethylated |
| cg14552379 | 0.14657 | 0.314418378 | 1.101096 | 0.000129 | hypermethylated |
| cg16642791 | 0.14095 | 0.302329189 | 1.100937 | 0.000129 | hypermethylated |
| cg04694035 | 0.14108 | 0.302553514 | 1.100677 | 1.12E-05 | hypermethylated |
| cg15724256 | 0.19001 | 0.407445946 | 1.100533 | 3.32E-05 | hypermethylated |
| cg20139706 | 0.22135 | 0.474589189 | 1.10035  | 2.18E-05 | hypermethylated |
| cg08550101 | 0.16276 | 0.348720541 | 1.099325 | 3.59E-06 | hypermethylated |
| cg07362168 | 0.16043 | 0.343623243 | 1.098884 | 0.000293 | hypermethylated |
| cg08260398 | 0.12321 | 0.263893514 | 1.098837 | 5.65E-05 | hypermethylated |
| cg22861561 | 0.16009 | 0.342863784 | 1.098752 | 0.000207 | hypermethylated |
| cg10103266 | 0.15194 | 0.325374595 | 1.0986   | 5.58E-05 | hypermethylated |
| cg21424940 | 0.18996 | 0.406682162 | 1.098206 | 6.05E-06 | hypermethylated |
| cg01874877 | 0.17505 | 0.374750811 | 1.098165 | 2.10E-05 | hypermethylated |
| cg10095577 | 0.1217  | 0.260519459 | 1.098062 | 9.72E-05 | hypermethylated |
| cg14228146 | 0.19693 | 0.421475676 | 1.097766 | 5.35E-06 | hypermethylated |
| cg02341815 | 0.13284 | 0.284285946 | 1.097653 | 1.21E-05 | hypermethylated |
| cg02915593 | 0.13551 | 0.289988108 | 1.097594 | 8.42E-05 | hypermethylated |
| cg21851672 | 0.22422 | 0.479768649 | 1.097424 | 6.39E-06 | hypermethylated |
| cg01270593 | 0.1427  | 0.305298919 | 1.097237 | 4.20E-05 | hypermethylated |

|            |         |             |          |          |                 |
|------------|---------|-------------|----------|----------|-----------------|
| cg13884568 | 0.13698 | 0.293001081 | 1.096941 | 0.0002   | hypermethylated |
| cg24277791 | 0.16938 | 0.362281622 | 1.096848 | 3.32E-05 | hypermethylated |
| cg10659886 | 0.22935 | 0.490362703 | 1.096298 | 5.00E-06 | hypermethylated |
| cg03149432 | 0.16901 | 0.361324324 | 1.096186 | 2.78E-05 | hypermethylated |
| cg03476673 | 0.1482  | 0.316767568 | 1.095879 | 2.27E-05 | hypermethylated |
| cg02431597 | 0.14417 | 0.308124324 | 1.095742 | 1.52E-05 | hypermethylated |
| cg22459630 | 0.18859 | 0.403040541 | 1.095672 | 0.000495 | hypermethylated |
| cg14582400 | 0.23859 | 0.509888649 | 1.095649 | 5.28E-06 | hypermethylated |
| cg01031101 | 0.15779 | 0.337175135 | 1.095492 | 9.60E-05 | hypermethylated |
| cg03386144 | 0.11772 | 0.251549189 | 1.095481 | 0.000607 | hypermethylated |
| cg13338798 | 0.18261 | 0.390130811 | 1.095192 | 1.37E-06 | hypermethylated |
| cg26220673 | 0.22821 | 0.487477297 | 1.094973 | 1.35E-05 | hypermethylated |
| cg14473924 | 0.19602 | 0.418515676 | 1.094281 | 0.000251 | hypermethylated |
| cg05965863 | 0.13874 | 0.29615027  | 1.093946 | 2.51E-05 | hypermethylated |
| cg17780246 | 0.22813 | 0.486947027 | 1.093909 | 9.07E-06 | hypermethylated |
| cg13844402 | 0.1657  | 0.353674054 | 1.093847 | 6.05E-06 | hypermethylated |
| cg16105687 | 0.2081  | 0.444155135 | 1.093787 | 1.75E-05 | hypermethylated |
| cg05312084 | 0.12607 | 0.26904973  | 1.093648 | 5.73E-06 | hypermethylated |
| cg00182639 | 0.23077 | 0.492402162 | 1.093381 | 1.37E-06 | hypermethylated |
| cg20963741 | 0.19824 | 0.422870811 | 1.092969 | 9.49E-05 | hypermethylated |
| cg18752880 | 0.14284 | 0.304694054 | 1.092961 | 8.22E-05 | hypermethylated |
| cg01866606 | 0.13531 | 0.288591892 | 1.092762 | 0.000613 | hypermethylated |
| cg20430077 | 0.13879 | 0.296013514 | 1.092759 | 2.51E-05 | hypermethylated |
| cg02316596 | 0.18071 | 0.385348108 | 1.092486 | 5.45E-05 | hypermethylated |
| cg13188098 | 0.17059 | 0.363677838 | 1.092128 | 6.08E-05 | hypermethylated |
| cg10672201 | 0.17631 | 0.375857838 | 1.092073 | 4.82E-05 | hypermethylated |
| cg19179801 | 0.1536  | 0.32744     | 1.092052 | 0.000204 | hypermethylated |
| cg21477176 | 0.23509 | 0.500949189 | 1.091451 | 1.42E-05 | hypermethylated |
| cg23303408 | 0.1214  | 0.258603784 | 1.090975 | 1.40E-05 | hypermethylated |
| cg21942490 | 0.14317 | 0.304858919 | 1.090413 | 1.58E-05 | hypermethylated |
| cg11080192 | 0.07275 | 0.154874054 | 1.090076 | 0.000232 | hypermethylated |
| cg27599792 | 0.18931 | 0.403003784 | 1.090043 | 5.73E-06 | hypermethylated |
| cg03940047 | 0.19128 | 0.407178919 | 1.089977 | 1.33E-05 | hypermethylated |
| cg20260127 | 0.20584 | 0.438089189 | 1.089701 | 1.54E-05 | hypermethylated |
| cg10783469 | 0.17423 | 0.370734595 | 1.089394 | 0.000335 | hypermethylated |
| cg07450037 | 0.18552 | 0.394756757 | 1.089389 | 0.000104 | hypermethylated |
| cg26130488 | 0.19579 | 0.416492973 | 1.088985 | 6.62E-05 | hypermethylated |
| cg12743978 | 0.16808 | 0.357511351 | 1.088841 | 3.76E-05 | hypermethylated |
| cg06437464 | 0.1427  | 0.303520541 | 1.088809 | 6.15E-05 | hypermethylated |
| cg08610862 | 0.21741 | 0.462418919 | 1.088782 | 0.000408 | hypermethylated |
| cg17099568 | 0.16203 | 0.344627568 | 1.088777 | 3.32E-05 | hypermethylated |
| cg10102762 | 0.11427 | 0.243028108 | 1.088676 | 3.32E-05 | hypermethylated |
| cg19305488 | 0.1323  | 0.281333514 | 1.088468 | 0.000646 | hypermethylated |
| cg02761376 | 0.108   | 0.229652432 | 1.088421 | 1.28E-05 | hypermethylated |
| cg25116269 | 0.07649 | 0.162619459 | 1.088157 | 6.62E-05 | hypermethylated |
| cg14262937 | 0.16048 | 0.341166486 | 1.088082 | 1.66E-05 | hypermethylated |
| cg03541338 | 0.19892 | 0.422802703 | 1.087796 | 5.58E-05 | hypermethylated |
| cg00901320 | 0.15932 | 0.338578919 | 1.087565 | 0.000129 | hypermethylated |
| cg00792849 | 0.15737 | 0.334397838 | 1.087405 | 2.54E-05 | hypermethylated |
| cg13019143 | 0.17216 | 0.36582     | 1.087384 | 6.57E-06 | hypermethylated |
| cg09767822 | 0.22941 | 0.48731027  | 1.086912 | 1.09E-05 | hypermethylated |
| cg01427458 | 0.16345 | 0.347101081 | 1.086506 | 4.76E-05 | hypermethylated |
| cg27259320 | 0.17161 | 0.364324865 | 1.086092 | 6.93E-06 | hypermethylated |
| cg26330116 | 0.1872  | 0.397403784 | 1.086025 | 0.000242 | hypermethylated |
| cg17586860 | 0.17596 | 0.373473514 | 1.085758 | 0.000445 | hypermethylated |
| cg27050153 | 0.21737 | 0.461305405 | 1.085569 | 1.84E-05 | hypermethylated |
| cg15698842 | 0.15864 | 0.33665027  | 1.085494 | 0.00039  | hypermethylated |
| cg08109815 | 0.16052 | 0.340623243 | 1.085424 | 2.64E-05 | hypermethylated |



|            |         |             |          |          |                 |
|------------|---------|-------------|----------|----------|-----------------|
| cg03612357 | 0.25696 | 0.545253514 | 1.085383 | 0.000107 | hypermethylated |
| cg27634344 | 0.18342 | 0.389161081 | 1.085216 | 1.99E-05 | hypermethylated |
| cg19029904 | 0.1794  | 0.38062973  | 1.085208 | 7.12E-05 | hypermethylated |
| cg00489401 | 0.23713 | 0.503096757 | 1.085158 | 1.31E-05 | hypermethylated |
| cg26473844 | 0.11049 | 0.23441027  | 1.08512  | 8.95E-06 | hypermethylated |
| cg04735310 | 0.16178 | 0.343205946 | 1.085041 | 1.58E-06 | hypermethylated |
| cg21153898 | 0.1735  | 0.368013514 | 1.084823 | 0.000506 | hypermethylated |
| cg07336617 | 0.18971 | 0.402341081 | 1.084623 | 3.00E-05 | hypermethylated |
| cg02320543 | 0.19442 | 0.412321622 | 1.084593 | 3.00E-05 | hypermethylated |
| cg06667761 | 0.16982 | 0.360140541 | 1.084554 | 1.62E-05 | hypermethylated |
| cg07609862 | 0.18356 | 0.389264865 | 1.0845   | 2.10E-05 | hypermethylated |
| cg03972665 | 0.16279 | 0.345197297 | 1.084409 | 1.84E-05 | hypermethylated |
| cg24801123 | 0.15346 | 0.325402703 | 1.084364 | 3.76E-05 | hypermethylated |
| cg21113740 | 0.21211 | 0.449708649 | 1.084178 | 7.93E-06 | hypermethylated |
| cg10640845 | 0.19765 | 0.418928649 | 1.083757 | 1.38E-05 | hypermethylated |
| cg17070988 | 0.19398 | 0.411072973 | 1.083487 | 1.31E-05 | hypermethylated |
| cg06650419 | 0.11673 | 0.247367568 | 1.083481 | 0.000126 | hypermethylated |
| cg15508809 | 0.17496 | 0.370691351 | 1.083193 | 3.76E-05 | hypermethylated |
| cg21413325 | 0.13244 | 0.280569189 | 1.083018 | 8.22E-05 | hypermethylated |
| cg15618978 | 0.18699 | 0.396121081 | 1.08298  | 5.58E-06 | hypermethylated |
| cg15032098 | 0.16498 | 0.349479459 | 1.082917 | 8.63E-05 | hypermethylated |
| cg06193578 | 0.17272 | 0.365845405 | 1.082799 | 8.63E-05 | hypermethylated |
| cg18938204 | 0.19002 | 0.402481081 | 1.08277  | 0.000111 | hypermethylated |
| cg06694734 | 0.16492 | 0.349303243 | 1.082714 | 0.000182 | hypermethylated |
| cg01886514 | 0.12829 | 0.271671351 | 1.082454 | 4.82E-05 | hypermethylated |
| cg07665387 | 0.17169 | 0.363556757 | 1.082375 | 2.39E-05 | hypermethylated |
| cg10522607 | 0.14868 | 0.314722162 | 1.081868 | 3.11E-05 | hypermethylated |
| cg19544372 | 0.16544 | 0.350132973 | 1.081595 | 2.24E-05 | hypermethylated |
| cg01175020 | 0.17528 | 0.370956757 | 1.08159  | 0.000117 | hypermethylated |
| cg14135731 | 0.14355 | 0.303790811 | 1.081525 | 4.42E-05 | hypermethylated |
| cg03422911 | 0.23515 | 0.497624324 | 1.081476 | 4.93E-06 | hypermethylated |
| cg06301178 | 0.22422 | 0.474459459 | 1.08137  | 7.47E-05 | hypermethylated |
| cg17210933 | 0.17664 | 0.373763784 | 1.081315 | 0.000142 | hypermethylated |
| cg10807260 | 0.1193  | 0.2524      | 1.081118 | 0.000172 | hypermethylated |
| cg00579520 | 0.16943 | 0.358414595 | 1.08094  | 1.04E-05 | hypermethylated |
| cg14047094 | 0.20361 | 0.430702703 | 1.080884 | 4.70E-05 | hypermethylated |
| cg05314394 | 0.19446 | 0.411333514 | 1.080835 | 1.77E-05 | hypermethylated |
| cg14054928 | 0.21268 | 0.449842703 | 1.080736 | 3.07E-05 | hypermethylated |
| cg07271264 | 0.21935 | 0.463830811 | 1.080364 | 0.000176 | hypermethylated |
| cg26865446 | 0.1757  | 0.371500541 | 1.08025  | 3.40E-05 | hypermethylated |
| cg00699029 | 0.14272 | 0.301743784 | 1.080137 | 4.36E-05 | hypermethylated |
| cg15598120 | 0.11867 | 0.250843243 | 1.079831 | 4.10E-05 | hypermethylated |
| cg02604503 | 0.16631 | 0.351540541 | 1.079816 | 8.03E-05 | hypermethylated |
| cg11806672 | 0.14248 | 0.301165946 | 1.079799 | 0.0002   | hypermethylated |
| cg04878701 | 0.14075 | 0.297503784 | 1.079773 | 8.04E-06 | hypermethylated |
| cg23615741 | 0.25452 | 0.537972973 | 1.079755 | 4.82E-05 | hypermethylated |
| cg21299542 | 0.15498 | 0.327567027 | 1.079708 | 3.95E-05 | hypermethylated |
| cg15683295 | 0.15583 | 0.329342162 | 1.079614 | 2.67E-05 | hypermethylated |
| cg16954341 | 0.15839 | 0.334725946 | 1.079499 | 0.00032  | hypermethylated |
| cg19378133 | 0.1694  | 0.357944865 | 1.079304 | 0.000274 | hypermethylated |
| cg23444265 | 0.15569 | 0.328965405 | 1.07926  | 0.000129 | hypermethylated |
| cg16792842 | 0.16748 | 0.353791892 | 1.078912 | 2.51E-05 | hypermethylated |
| cg08409113 | 0.22926 | 0.484122703 | 1.078388 | 9.05E-05 | hypermethylated |
| cg11893763 | 0.1879  | 0.396662162 | 1.077946 | 3.32E-05 | hypermethylated |
| cg14489474 | 0.19858 | 0.41917027  | 1.077816 | 8.83E-06 | hypermethylated |
| cg08120263 | 0.21275 | 0.449068649 | 1.077777 | 1.14E-05 | hypermethylated |
| cg02925601 | 0.19757 | 0.41696973  | 1.077579 | 8.63E-05 | hypermethylated |
| cg16876790 | 0.16127 | 0.34033027  | 1.077457 | 2.89E-05 | hypermethylated |

|            |         |             |          |          |                 |
|------------|---------|-------------|----------|----------|-----------------|
| cg16167240 | 0.18302 | 0.386214054 | 1.077399 | 1.84E-05 | hypermethylated |
| cg21480165 | 0.16975 | 0.358188108 | 1.077306 | 0.000112 | hypermethylated |
| cg06825039 | 0.17056 | 0.359854595 | 1.077135 | 5.58E-05 | hypermethylated |
| cg00107772 | 0.16321 | 0.344334054 | 1.077079 | 1.80E-05 | hypermethylated |
| cg06493386 | 0.14769 | 0.311515135 | 1.07673  | 3.00E-05 | hypermethylated |
| cg22115076 | 0.23865 | 0.503251892 | 1.076384 | 3.17E-06 | hypermethylated |
| cg01100175 | 0.15776 | 0.332654054 | 1.076291 | 2.71E-05 | hypermethylated |
| cg18950778 | 0.15679 | 0.330555676 | 1.07606  | 6.05E-06 | hypermethylated |
| cg24621972 | 0.16116 | 0.339747027 | 1.075967 | 3.76E-05 | hypermethylated |
| cg12337525 | 0.19572 | 0.412567568 | 1.075839 | 1.99E-05 | hypermethylated |
| cg21096915 | 0.17421 | 0.367217297 | 1.075807 | 0.000119 | hypermethylated |
| cg27621129 | 0.18295 | 0.385583784 | 1.075595 | 6.13E-06 | hypermethylated |
| cg00741624 | 0.1882  | 0.396638378 | 1.075558 | 4.26E-05 | hypermethylated |
| cg07961015 | 0.19945 | 0.420248649 | 1.075216 | 1.89E-05 | hypermethylated |
| cg22914729 | 0.17663 | 0.372132432 | 1.075086 | 4.05E-05 | hypermethylated |
| cg12176709 | 0.1586  | 0.33413027  | 1.075018 | 0.000115 | hypermethylated |
| cg12285988 | 0.22074 | 0.464807568 | 1.074285 | 1.15E-05 | hypermethylated |
| cg22052948 | 0.22834 | 0.480757297 | 1.074125 | 1.46E-05 | hypermethylated |
| cg14146740 | 0.12624 | 0.265716757 | 1.07372  | 0.000129 | hypermethylated |
| cg17085352 | 0.16023 | 0.337247027 | 1.073661 | 2.71E-05 | hypermethylated |
| cg22871653 | 0.14895 | 0.313483243 | 1.07356  | 0.000274 | hypermethylated |
| cg05787556 | 0.18323 | 0.385603784 | 1.073463 | 1.09E-06 | hypermethylated |
| cg05043886 | 0.13205 | 0.277886486 | 1.073411 | 1.39E-05 | hypermethylated |
| cg27471124 | 0.18691 | 0.39332     | 1.07336  | 1.14E-05 | hypermethylated |
| cg13169011 | 0.1846  | 0.388402162 | 1.073149 | 0.000102 | hypermethylated |
| cg04950301 | 0.16667 | 0.350648649 | 1.073032 | 7.32E-06 | hypermethylated |
| cg23010048 | 0.18225 | 0.383418919 | 1.073003 | 0.000417 | hypermethylated |
| cg16042149 | 0.19038 | 0.400498378 | 1.072914 | 6.62E-05 | hypermethylated |
| cg06786064 | 0.16254 | 0.341927027 | 1.072894 | 7.03E-06 | hypermethylated |
| cg12199221 | 0.19537 | 0.410889189 | 1.07254  | 0.000191 | hypermethylated |
| cg02895156 | 0.15221 | 0.320066486 | 1.072308 | 0.000187 | hypermethylated |
| cg15402529 | 0.18168 | 0.381984324 | 1.072114 | 1.28E-05 | hypermethylated |
| cg18128969 | 0.13565 | 0.285189189 | 1.07203  | 1.66E-05 | hypermethylated |
| cg00683332 | 0.26678 | 0.560825405 | 1.071901 | 1.18E-05 | hypermethylated |
| cg09615505 | 0.20998 | 0.441406486 | 1.071856 | 1.04E-05 | hypermethylated |
| cg02920216 | 0.23507 | 0.494085405 | 1.07167  | 6.62E-05 | hypermethylated |
| cg16666329 | 0.15712 | 0.330159459 | 1.071296 | 1.54E-05 | hypermethylated |
| cg25359908 | 0.12384 | 0.260179459 | 1.07103  | 0.000134 | hypermethylated |
| cg12294208 | 0.16845 | 0.353883784 | 1.070955 | 4.58E-05 | hypermethylated |
| cg08260406 | 0.21609 | 0.453932973 | 1.070847 | 3.32E-05 | hypermethylated |
| cg23262897 | 0.21984 | 0.46178973  | 1.070782 | 6.05E-06 | hypermethylated |
| cg17018096 | 0.17144 | 0.360121081 | 1.070778 | 8.60E-06 | hypermethylated |
| cg07745624 | 0.17822 | 0.374246486 | 1.07033  | 2.78E-05 | hypermethylated |
| cg22855255 | 0.19547 | 0.410465405 | 1.070313 | 0.000166 | hypermethylated |
| cg06871074 | 0.15477 | 0.324955135 | 1.070115 | 1.71E-05 | hypermethylated |
| cg01581084 | 0.25663 | 0.538740541 | 1.069901 | 1.50E-05 | hypermethylated |
| cg16423682 | 0.12531 | 0.263059459 | 1.069887 | 0.000135 | hypermethylated |
| cg12895779 | 0.12949 | 0.271818378 | 1.069802 | 3.67E-05 | hypermethylated |
| cg14202850 | 0.173   | 0.363128649 | 1.069709 | 4.70E-05 | hypermethylated |
| cg22740492 | 0.13062 | 0.273965405 | 1.068618 | 2.92E-05 | hypermethylated |
| cg12464561 | 0.13917 | 0.291876216 | 1.068508 | 1.25E-05 | hypermethylated |
| cg08301299 | 0.10979 | 0.230207027 | 1.068185 | 0.000168 | hypermethylated |
| cg11565299 | 0.15155 | 0.317763784 | 1.068161 | 9.07E-06 | hypermethylated |
| cg17102963 | 0.14559 | 0.305187568 | 1.067785 | 0.000135 | hypermethylated |
| cg26199241 | 0.19512 | 0.408965405 | 1.067617 | 0.001667 | hypermethylated |
| cg16981024 | 0.15263 | 0.319903243 | 1.067597 | 0.000229 | hypermethylated |
| cg08280468 | 0.17372 | 0.364012432 | 1.067224 | 9.82E-06 | hypermethylated |
| cg08690634 | 0.15456 | 0.323842703 | 1.067126 | 5.51E-05 | hypermethylated |

|            |         |             |          |          |                 |
|------------|---------|-------------|----------|----------|-----------------|
| cg17834752 | 0.1432  | 0.299996757 | 1.066915 | 0.001052 | hypermethylated |
| cg06668555 | 0.15905 | 0.333163243 | 1.066749 | 0.000132 | hypermethylated |
| cg11089489 | 0.17215 | 0.3606      | 1.066733 | 1.42E-05 | hypermethylated |
| cg11101926 | 0.18443 | 0.386308108 | 1.066679 | 0.000159 | hypermethylated |
| cg11325267 | 0.16748 | 0.350591892 | 1.065804 | 2.15E-05 | hypermethylated |
| cg14526953 | 0.14354 | 0.300468649 | 1.065762 | 6.38E-05 | hypermethylated |
| cg14089267 | 0.24682 | 0.516647568 | 1.065721 | 6.70E-05 | hypermethylated |
| cg02249074 | 0.12815 | 0.268211892 | 1.06554  | 1.80E-05 | hypermethylated |
| cg01228134 | 0.19244 | 0.402718378 | 1.065363 | 0.000112 | hypermethylated |
| cg00413617 | 0.18582 | 0.388828649 | 1.065229 | 2.89E-05 | hypermethylated |
| cg14463412 | 0.16052 | 0.335842162 | 1.06503  | 0.000313 | hypermethylated |
| cg03109101 | 0.1549  | 0.324075676 | 1.064994 | 2.04E-05 | hypermethylated |
| cg13702996 | 0.14023 | 0.293345405 | 1.064805 | 7.84E-05 | hypermethylated |
| cg08810842 | 0.28353 | 0.593094054 | 1.06476  | 6.57E-06 | hypermethylated |
| cg01687680 | 0.1854  | 0.387807027 | 1.064698 | 3.19E-05 | hypermethylated |
| cg02034102 | 0.16162 | 0.338007568 | 1.06445  | 6.15E-05 | hypermethylated |
| cg26309511 | 0.17631 | 0.368707568 | 1.064363 | 3.85E-05 | hypermethylated |
| cg04263186 | 0.13893 | 0.29044973  | 1.06393  | 3.23E-05 | hypermethylated |
| cg23542968 | 0.17414 | 0.364048108 | 1.063881 | 4.94E-05 | hypermethylated |
| cg15672768 | 0.24712 | 0.516608649 | 1.06386  | 1.54E-05 | hypermethylated |
| cg08172065 | 0.12231 | 0.255683784 | 1.063818 | 2.10E-05 | hypermethylated |
| cg21106407 | 0.17794 | 0.371967568 | 1.063786 | 4.15E-05 | hypermethylated |
| cg11414921 | 0.15748 | 0.329149189 | 1.063573 | 0.000306 | hypermethylated |
| cg02658693 | 0.14801 | 0.30933027  | 1.063453 | 4.58E-05 | hypermethylated |
| cg11150585 | 0.15207 | 0.317775135 | 1.063271 | 0.000287 | hypermethylated |
| cg25309759 | 0.15595 | 0.325827568 | 1.063025 | 5.19E-05 | hypermethylated |
| cg15085086 | 0.18083 | 0.377733514 | 1.062735 | 0.000178 | hypermethylated |
| cg03231647 | 0.18385 | 0.383945405 | 1.062372 | 9.82E-06 | hypermethylated |
| cg04054313 | 0.17039 | 0.355814595 | 1.062285 | 0.000207 | hypermethylated |
| cg24842086 | 0.18616 | 0.388695676 | 1.062098 | 1.92E-05 | hypermethylated |
| cg10029186 | 0.1373  | 0.286651351 | 1.061965 | 1.99E-05 | hypermethylated |
| cg26783679 | 0.1143  | 0.238597297 | 1.061752 | 4.47E-05 | hypermethylated |
| cg22151446 | 0.17616 | 0.367706486 | 1.061668 | 3.95E-05 | hypermethylated |
| cg13302823 | 0.22377 | 0.467067568 | 1.061615 | 1.66E-05 | hypermethylated |
| cg03158581 | 0.12146 | 0.253518919 | 1.061612 | 1.26E-05 | hypermethylated |
| cg24106020 | 0.14846 | 0.309761622 | 1.061084 | 8.26E-06 | hypermethylated |
| cg02849693 | 0.2489  | 0.519260541 | 1.060892 | 1.14E-05 | hypermethylated |
| cg09307530 | 0.20112 | 0.419498378 | 1.060609 | 3.17E-06 | hypermethylated |
| cg12510458 | 0.1502  | 0.313199459 | 1.060197 | 2.92E-05 | hypermethylated |
| cg17340519 | 0.216   | 0.450383784 | 1.060124 | 4.54E-06 | hypermethylated |
| cg00007644 | 0.12053 | 0.251316757 | 1.060115 | 2.27E-05 | hypermethylated |
| cg06679334 | 0.28368 | 0.591387027 | 1.059838 | 7.93E-06 | hypermethylated |
| cg21609339 | 0.15186 | 0.316575135 | 1.059806 | 6.95E-05 | hypermethylated |
| cg16218721 | 0.18483 | 0.385191892 | 1.059378 | 2.75E-06 | hypermethylated |
| cg25761626 | 0.13037 | 0.27168973  | 1.059348 | 0.000688 | hypermethylated |
| cg02488338 | 0.2367  | 0.493231892 | 1.059206 | 2.21E-05 | hypermethylated |
| cg14720763 | 0.13066 | 0.272246486 | 1.059096 | 4.53E-05 | hypermethylated |
| cg03662064 | 0.15251 | 0.317742162 | 1.058953 | 0.000148 | hypermethylated |
| cg16713687 | 0.14394 | 0.299859459 | 1.058819 | 0.000485 | hypermethylated |
| cg17392573 | 0.17772 | 0.370194595 | 1.058678 | 4.42E-05 | hypermethylated |
| cg19751300 | 0.13031 | 0.271416216 | 1.058559 | 0.00012  | hypermethylated |
| cg05903444 | 0.2256  | 0.469880541 | 1.058527 | 1.62E-05 | hypermethylated |
| cg18869404 | 0.18264 | 0.380383243 | 1.058451 | 6.22E-06 | hypermethylated |
| cg18175809 | 0.19334 | 0.402548108 | 1.058021 | 2.85E-05 | hypermethylated |
| cg19893751 | 0.20753 | 0.432062703 | 1.057921 | 0.000117 | hypermethylated |
| cg17518215 | 0.20986 | 0.436789189 | 1.05751  | 8.15E-06 | hypermethylated |
| cg14319235 | 0.20231 | 0.420969189 | 1.057147 | 1.68E-05 | hypermethylated |
| cg03867465 | 0.2807  | 0.584002703 | 1.056946 | 7.52E-06 | hypermethylated |

|            |         |             |          |          |                 |
|------------|---------|-------------|----------|----------|-----------------|
| cg01161204 | 0.21092 | 0.438713514 | 1.056583 | 4.47E-05 | hypermethylated |
| cg23714408 | 0.14852 | 0.308902162 | 1.056493 | 7.12E-05 | hypermethylated |
| cg23448486 | 0.16664 | 0.346584865 | 1.056474 | 7.32E-06 | hypermethylated |
| cg20916535 | 0.16253 | 0.33801027  | 1.056361 | 7.12E-05 | hypermethylated |
| cg04020079 | 0.22683 | 0.471671351 | 1.056171 | 5.58E-05 | hypermethylated |
| cg03091551 | 0.20161 | 0.419203784 | 1.056085 | 1.89E-05 | hypermethylated |
| cg16816603 | 0.17773 | 0.369488108 | 1.055841 | 0.000112 | hypermethylated |
| cg00397673 | 0.19334 | 0.401896757 | 1.055685 | 8.83E-06 | hypermethylated |
| cg01541645 | 0.17965 | 0.373362162 | 1.055387 | 3.57E-05 | hypermethylated |
| cg06980387 | 0.14532 | 0.30195027  | 1.055078 | 5.45E-05 | hypermethylated |
| cg13822303 | 0.15024 | 0.312161622 | 1.055024 | 9.49E-05 | hypermethylated |
| cg03774463 | 0.18638 | 0.387242703 | 1.054991 | 0.000166 | hypermethylated |
| cg03020554 | 0.16095 | 0.334403243 | 1.054976 | 6.78E-05 | hypermethylated |
| cg14381623 | 0.15356 | 0.318939459 | 1.05448  | 0.000681 | hypermethylated |
| cg21431690 | 0.12514 | 0.259900541 | 1.054417 | 2.71E-05 | hypermethylated |
| cg15532640 | 0.26832 | 0.557261622 | 1.0544   | 0.000726 | hypermethylated |
| cg05462543 | 0.18387 | 0.381845946 | 1.054305 | 0.000681 | hypermethylated |
| cg02447304 | 0.22151 | 0.459913514 | 1.053991 | 6.57E-06 | hypermethylated |
| cg12432236 | 0.21771 | 0.451805946 | 1.053296 | 9.27E-05 | hypermethylated |
| cg08061040 | 0.12795 | 0.265521622 | 1.053249 | 1.35E-05 | hypermethylated |
| cg13928649 | 0.16593 | 0.344284324 | 1.053026 | 1.50E-05 | hypermethylated |
| cg14005246 | 0.17284 | 0.358561622 | 1.052784 | 0.000178 | hypermethylated |
| cg01243371 | 0.27373 | 0.567828108 | 1.052701 | 9.05E-05 | hypermethylated |
| cg26979339 | 0.12086 | 0.250675135 | 1.052482 | 6.31E-05 | hypermethylated |
| cg17352540 | 0.16445 | 0.340952973 | 1.051924 | 4.82E-05 | hypermethylated |
| cg13640145 | 0.20101 | 0.416735676 | 1.051865 | 2.45E-05 | hypermethylated |
| cg15373592 | 0.26255 | 0.544225946 | 1.051614 | 1.04E-05 | hypermethylated |
| cg24396745 | 0.12127 | 0.251362703 | 1.051548 | 0.000107 | hypermethylated |
| cg26972272 | 0.13928 | 0.28860973  | 1.051132 | 9.16E-05 | hypermethylated |
| cg11936688 | 0.12313 | 0.255134595 | 1.051076 | 1.66E-05 | hypermethylated |
| cg22850587 | 0.19236 | 0.398493514 | 1.050747 | 1.15E-05 | hypermethylated |
| cg03237648 | 0.14779 | 0.306107027 | 1.050488 | 6.01E-05 | hypermethylated |
| cg17003736 | 0.16735 | 0.346589189 | 1.050358 | 9.57E-06 | hypermethylated |
| cg22910449 | 0.17356 | 0.359403243 | 1.050169 | 5.19E-05 | hypermethylated |
| cg07622493 | 0.18141 | 0.375636757 | 1.050084 | 0.000274 | hypermethylated |
| cg11073773 | 0.16891 | 0.349730811 | 1.04999  | 0.000122 | hypermethylated |
| cg00899090 | 0.13749 | 0.28453027  | 1.049255 | 1.72E-06 | hypermethylated |
| cg21165221 | 0.16055 | 0.332224324 | 1.049135 | 1.21E-05 | hypermethylated |
| cg15490703 | 0.17027 | 0.3523      | 1.04898  | 1.94E-05 | hypermethylated |
| cg22533573 | 0.14427 | 0.298383243 | 1.048395 | 9.82E-06 | hypermethylated |
| cg22605415 | 0.16692 | 0.345213514 | 1.048332 | 0.000142 | hypermethylated |
| cg22400703 | 0.22685 | 0.469070811 | 1.048067 | 0.000313 | hypermethylated |
| cg11909912 | 0.16336 | 0.337756757 | 1.04793  | 3.95E-05 | hypermethylated |
| cg14186187 | 0.13694 | 0.283065946 | 1.047594 | 0.000232 | hypermethylated |
| cg23337620 | 0.17239 | 0.356297297 | 1.047405 | 3.90E-06 | hypermethylated |
| cg22605919 | 0.22749 | 0.470172432 | 1.047387 | 4.93E-06 | hypermethylated |
| cg05079049 | 0.21963 | 0.453814595 | 1.047028 | 6.22E-06 | hypermethylated |
| cg07892413 | 0.13943 | 0.288083784 | 1.046947 | 0.000145 | hypermethylated |
| cg03679521 | 0.14481 | 0.299196216 | 1.046931 | 0.00049  | hypermethylated |
| cg09989644 | 0.15157 | 0.313158919 | 1.046911 | 9.57E-06 | hypermethylated |
| cg27553162 | 0.16449 | 0.339830811 | 1.046817 | 0.000653 | hypermethylated |
| cg15600488 | 0.1713  | 0.353882162 | 1.046744 | 4.82E-05 | hypermethylated |
| cg13962664 | 0.15768 | 0.325711351 | 1.046594 | 1.54E-05 | hypermethylated |
| cg04902302 | 0.15743 | 0.325083243 | 1.046099 | 1.52E-05 | hypermethylated |
| cg09806671 | 0.21512 | 0.444202703 | 1.046077 | 3.79E-06 | hypermethylated |
| cg08492173 | 0.21209 | 0.437860541 | 1.045795 | 1.66E-05 | hypermethylated |
| cg01664241 | 0.18122 | 0.374014595 | 1.045352 | 1.04E-05 | hypermethylated |
| cg05081498 | 0.23496 | 0.484918919 | 1.045328 | 9.95E-05 | hypermethylated |

|            |         |             |          |          |                 |
|------------|---------|-------------|----------|----------|-----------------|
| cg13436155 | 0.18251 | 0.376534595 | 1.044807 | 1.30E-05 | hypermethylated |
| cg25307665 | 0.17758 | 0.366322703 | 1.044646 | 0.00032  | hypermethylated |
| cg25558103 | 0.23209 | 0.478726486 | 1.044517 | 0.000127 | hypermethylated |
| cg17282004 | 0.17493 | 0.360795676 | 1.044404 | 4.58E-05 | hypermethylated |
| cg27067781 | 0.24806 | 0.511518378 | 1.044097 | 1.84E-05 | hypermethylated |
| cg14006181 | 0.19131 | 0.394483784 | 1.044054 | 2.78E-05 | hypermethylated |
| cg18097850 | 0.14152 | 0.291798919 | 1.043969 | 1.84E-05 | hypermethylated |
| cg22095604 | 0.18907 | 0.389841081 | 1.043966 | 0.000226 | hypermethylated |
| cg19161124 | 0.22707 | 0.46813027  | 1.043773 | 1.50E-05 | hypermethylated |
| cg15270892 | 0.20536 | 0.423356216 | 1.043717 | 5.45E-05 | hypermethylated |
| cg17074396 | 0.17781 | 0.36655027  | 1.043675 | 0.000327 | hypermethylated |
| cg11293190 | 0.18382 | 0.378878378 | 1.043441 | 3.23E-05 | hypermethylated |
| cg23815646 | 0.17431 | 0.359272973 | 1.043425 | 4.58E-05 | hypermethylated |
| cg00582524 | 0.25203 | 0.519405946 | 1.043267 | 2.39E-05 | hypermethylated |
| cg18100702 | 0.18621 | 0.383739459 | 1.043197 | 1.12E-06 | hypermethylated |
| cg06686226 | 0.15624 | 0.321976216 | 1.04319  | 0.000224 | hypermethylated |
| cg13231921 | 0.17441 | 0.359295135 | 1.042687 | 8.42E-05 | hypermethylated |
| cg19416570 | 0.23173 | 0.477326486 | 1.042532 | 7.65E-05 | hypermethylated |
| cg11319389 | 0.17632 | 0.363156757 | 1.042396 | 0.000126 | hypermethylated |
| cg04330683 | 0.18155 | 0.373862162 | 1.04214  | 8.37E-06 | hypermethylated |
| cg10978753 | 0.19455 | 0.400604865 | 1.042039 | 7.29E-05 | hypermethylated |
| cg02471153 | 0.20988 | 0.43212973  | 1.0419   | 4.30E-06 | hypermethylated |
| cg26131286 | 0.18406 | 0.378948649 | 1.041826 | 0.000857 | hypermethylated |
| cg03445516 | 0.18485 | 0.380480541 | 1.041468 | 6.22E-06 | hypermethylated |
| cg03008707 | 0.14908 | 0.306848649 | 1.041441 | 0.000293 | hypermethylated |
| cg26151467 | 0.2232  | 0.459388649 | 1.041378 | 3.85E-05 | hypermethylated |
| cg09189772 | 0.16504 | 0.339622703 | 1.041117 | 0.000189 | hypermethylated |
| cg13318787 | 0.17691 | 0.364004865 | 1.040942 | 2.95E-06 | hypermethylated |
| cg09731694 | 0.15918 | 0.327484324 | 1.040767 | 0.000166 | hypermethylated |
| cg21322436 | 0.22185 | 0.456374054 | 1.040632 | 0.000117 | hypermethylated |
| cg07084163 | 0.15345 | 0.315651351 | 1.040563 | 1.66E-05 | hypermethylated |
| cg19593767 | 0.27047 | 0.556315676 | 1.040435 | 6.14E-06 | hypermethylated |
| cg14383828 | 0.16191 | 0.332957297 | 1.040145 | 8.03E-05 | hypermethylated |
| cg09660365 | 0.19136 | 0.393478919 | 1.039997 | 1.66E-05 | hypermethylated |
| cg04881814 | 0.20457 | 0.420570811 | 1.039754 | 1.12E-05 | hypermethylated |
| cg18143296 | 0.19435 | 0.399534595 | 1.039663 | 1.06E-05 | hypermethylated |
| cg27334919 | 0.21827 | 0.448694054 | 1.039618 | 2.39E-05 | hypermethylated |
| cg02554345 | 0.18749 | 0.385408649 | 1.039575 | 1.40E-05 | hypermethylated |
| cg27086874 | 0.19074 | 0.392085946 | 1.039563 | 5.51E-05 | hypermethylated |
| cg12626956 | 0.19277 | 0.396225946 | 1.039443 | 1.37E-05 | hypermethylated |
| cg02257793 | 0.14526 | 0.298563243 | 1.039399 | 0.000104 | hypermethylated |
| cg26499363 | 0.17202 | 0.353505946 | 1.039158 | 4.05E-05 | hypermethylated |
| cg12460133 | 0.27301 | 0.560951892 | 1.038923 | 3.67E-05 | hypermethylated |
| cg18181607 | 0.17984 | 0.369504865 | 1.038879 | 3.23E-05 | hypermethylated |
| cg17459298 | 0.18097 | 0.371802162 | 1.038785 | 6.15E-05 | hypermethylated |
| cg06760710 | 0.18547 | 0.381032973 | 1.03873  | 2.67E-05 | hypermethylated |
| cg27295832 | 0.16241 | 0.333648649 | 1.038689 | 0.000191 | hypermethylated |
| cg27549878 | 0.19281 | 0.395996757 | 1.038309 | 3.57E-05 | hypermethylated |
| cg08664487 | 0.20061 | 0.41196973  | 1.038145 | 1.94E-05 | hypermethylated |
| cg25657713 | 0.2107  | 0.432608108 | 1.03787  | 3.30E-06 | hypermethylated |
| cg19267596 | 0.17688 | 0.363126486 | 1.037701 | 0.0003   | hypermethylated |
| cg17864046 | 0.15519 | 0.318584324 | 1.03764  | 8.63E-05 | hypermethylated |
| cg04754315 | 0.182   | 0.373534595 | 1.037303 | 0.00017  | hypermethylated |
| cg24954590 | 0.16511 | 0.33877027  | 1.03688  | 3.32E-05 | hypermethylated |
| cg24865270 | 0.17157 | 0.352021622 | 1.036867 | 6.22E-06 | hypermethylated |
| cg07440398 | 0.21116 | 0.433248108 | 1.036857 | 1.46E-05 | hypermethylated |
| cg18358723 | 0.19693 | 0.404050811 | 1.036854 | 1.52E-05 | hypermethylated |
| cg02575712 | 0.13374 | 0.274362703 | 1.036653 | 0.000154 | hypermethylated |

|            |         |             |          |          |                 |
|------------|---------|-------------|----------|----------|-----------------|
| cg14959729 | 0.15727 | 0.322631892 | 1.036646 | 6.75E-06 | hypermethylated |
| cg10721834 | 0.28629 | 0.587270811 | 1.036549 | 1.71E-05 | hypermethylated |
| cg05039548 | 0.17273 | 0.354246486 | 1.036235 | 2.10E-05 | hypermethylated |
| cg18492126 | 0.15198 | 0.311684865 | 1.036207 | 7.22E-06 | hypermethylated |
| cg04605987 | 0.17717 | 0.363305946 | 1.036051 | 2.57E-05 | hypermethylated |
| cg13347071 | 0.13678 | 0.28046973  | 1.035988 | 5.31E-05 | hypermethylated |
| cg12055515 | 0.25008 | 0.512776216 | 1.03594  | 2.71E-05 | hypermethylated |
| cg26820037 | 0.16151 | 0.331164324 | 1.035924 | 0.000155 | hypermethylated |
| cg23292160 | 0.16546 | 0.33919027  | 1.035612 | 3.00E-05 | hypermethylated |
| cg17966192 | 0.16794 | 0.344209189 | 1.03534  | 0.000262 | hypermethylated |
| cg22879667 | 0.18753 | 0.384352973 | 1.03531  | 6.22E-06 | hypermethylated |
| cg13702053 | 0.17076 | 0.34994973  | 1.035178 | 3.67E-05 | hypermethylated |
| cg24071582 | 0.19703 | 0.403764324 | 1.035098 | 0.000277 | hypermethylated |
| cg13315147 | 0.2133  | 0.437092432 | 1.035054 | 0.000204 | hypermethylated |
| cg15491461 | 0.14014 | 0.287144324 | 1.034907 | 0.00024  | hypermethylated |
| cg21214293 | 0.19085 | 0.391018919 | 1.034799 | 1.09E-05 | hypermethylated |
| cg04930919 | 0.1175  | 0.240687027 | 1.034498 | 1.01E-05 | hypermethylated |
| cg10965575 | 0.16133 | 0.330347568 | 1.03397  | 0.000588 | hypermethylated |
| cg13307880 | 0.21358 | 0.437263784 | 1.033727 | 1.28E-05 | hypermethylated |
| cg04235768 | 0.11223 | 0.229764324 | 1.033696 | 0.00029  | hypermethylated |
| cg18525486 | 0.19303 | 0.395178919 | 1.033681 | 0.000109 | hypermethylated |
| cg19857737 | 0.09899 | 0.202653514 | 1.03366  | 3.23E-05 | hypermethylated |
| cg09988738 | 0.16189 | 0.331377838 | 1.033463 | 6.78E-05 | hypermethylated |
| cg00321709 | 0.21053 | 0.43092973  | 1.033427 | 0.000726 | hypermethylated |
| cg24139737 | 0.18524 | 0.379163243 | 1.033423 | 3.85E-05 | hypermethylated |
| cg02222728 | 0.16255 | 0.332713514 | 1.033397 | 8.15E-06 | hypermethylated |
| cg04427003 | 0.1276  | 0.261164865 | 1.033332 | 1.21E-05 | hypermethylated |
| cg18813020 | 0.19908 | 0.407462703 | 1.03332  | 2.85E-05 | hypermethylated |
| cg20507276 | 0.19988 | 0.408962162 | 1.032833 | 5.58E-05 | hypermethylated |
| cg24645221 | 0.14293 | 0.292398378 | 1.032627 | 1.42E-05 | hypermethylated |
| cg15541630 | 0.24935 | 0.510022703 | 1.032389 | 2.49E-06 | hypermethylated |
| cg02052905 | 0.18263 | 0.373543243 | 1.032351 | 7.03E-05 | hypermethylated |
| cg13985817 | 0.18807 | 0.384663784 | 1.032328 | 1.35E-05 | hypermethylated |
| cg18784435 | 0.19404 | 0.396844865 | 1.032221 | 4.15E-05 | hypermethylated |
| cg00723994 | 0.18358 | 0.375325946 | 1.031735 | 0.000161 | hypermethylated |
| cg19828791 | 0.10933 | 0.223520541 | 1.031718 | 5.19E-05 | hypermethylated |
| cg01083633 | 0.16223 | 0.331662703 | 1.031676 | 0.000403 | hypermethylated |
| cg03587978 | 0.167   | 0.341383784 | 1.031546 | 1.01E-05 | hypermethylated |
| cg00637687 | 0.17452 | 0.356739459 | 1.031478 | 4.58E-05 | hypermethylated |
| cg00064261 | 0.14465 | 0.295642703 | 1.031288 | 0.000129 | hypermethylated |
| cg21587238 | 0.25653 | 0.524295676 | 1.031253 | 0.000454 | hypermethylated |
| cg00084338 | 0.22319 | 0.456124865 | 1.031156 | 0.001368 | hypermethylated |
| cg04267526 | 0.1995  | 0.40764973  | 1.030941 | 2.21E-05 | hypermethylated |
| cg15786900 | 0.19273 | 0.393722703 | 1.030599 | 1.05E-05 | hypermethylated |
| cg22637890 | 0.15725 | 0.32124     | 1.030592 | 0.000109 | hypermethylated |
| cg05924485 | 0.25202 | 0.514756757 | 1.030353 | 2.64E-06 | hypermethylated |
| cg02485566 | 0.17738 | 0.36226973  | 1.030221 | 1.02E-05 | hypermethylated |
| cg09225457 | 0.21644 | 0.441980541 | 1.030016 | 0.000185 | hypermethylated |
| cg06558502 | 0.18381 | 0.375332432 | 1.029954 | 2.21E-05 | hypermethylated |
| cg18065811 | 0.15973 | 0.326157838 | 1.029935 | 0.000163 | hypermethylated |
| cg00123762 | 0.2564  | 0.52344     | 1.029628 | 0.000912 | hypermethylated |
| cg03058660 | 0.25594 | 0.522401622 | 1.029354 | 2.48E-05 | hypermethylated |
| cg26949694 | 0.18625 | 0.380106486 | 1.029163 | 2.10E-05 | hypermethylated |
| cg00831126 | 0.21363 | 0.435939459 | 1.029014 | 2.15E-05 | hypermethylated |
| cg13891702 | 0.13796 | 0.281515676 | 1.028965 | 0.000132 | hypermethylated |
| cg21580428 | 0.15096 | 0.307999459 | 1.028761 | 6.31E-05 | hypermethylated |
| cg06756919 | 0.18471 | 0.376815676 | 1.028597 | 2.42E-05 | hypermethylated |
| cg10108296 | 0.21373 | 0.435988108 | 1.028499 | 2.29E-06 | hypermethylated |

|            |         |             |          |          |                 |
|------------|---------|-------------|----------|----------|-----------------|
| cg09559950 | 0.13613 | 0.277625405 | 1.028155 | 0.00032  | hypermethylated |
| cg10502121 | 0.25696 | 0.524015676 | 1.028066 | 4.24E-06 | hypermethylated |
| cg21538208 | 0.27916 | 0.569152432 | 1.027723 | 7.12E-06 | hypermethylated |
| cg02996801 | 0.20224 | 0.41232     | 1.027696 | 1.48E-05 | hypermethylated |
| cg13016408 | 0.14423 | 0.294026486 | 1.027575 | 7.84E-05 | hypermethylated |
| cg05184377 | 0.22885 | 0.466463784 | 1.027363 | 4.36E-06 | hypermethylated |
| cg06095270 | 0.11744 | 0.239358919 | 1.027252 | 1.09E-05 | hypermethylated |
| cg09746494 | 0.14769 | 0.300987568 | 1.027132 | 2.64E-05 | hypermethylated |
| cg07035165 | 0.22157 | 0.451477297 | 1.026891 | 0.000142 | hypermethylated |
| cg12627071 | 0.16302 | 0.332145405 | 1.026766 | 0.000209 | hypermethylated |
| cg11268834 | 0.22577 | 0.459738378 | 1.025959 | 4.70E-05 | hypermethylated |
| cg08482531 | 0.17597 | 0.358234595 | 1.025575 | 2.36E-06 | hypermethylated |
| cg00584026 | 0.28826 | 0.58666     | 1.025154 | 0.000563 | hypermethylated |
| cg19556343 | 0.15908 | 0.323711351 | 1.024955 | 1.62E-05 | hypermethylated |
| cg03972398 | 0.13572 | 0.276146486 | 1.0248   | 0.00035  | hypermethylated |
| cg11605835 | 0.18656 | 0.379518919 | 1.024532 | 1.80E-05 | hypermethylated |
| cg25442600 | 0.229   | 0.465847568 | 1.02451  | 1.35E-05 | hypermethylated |
| cg06364757 | 0.1379  | 0.280463784 | 1.024192 | 7.84E-05 | hypermethylated |
| cg05501996 | 0.27437 | 0.558008108 | 1.024163 | 5.43E-06 | hypermethylated |
| cg12700788 | 0.15676 | 0.31871027  | 1.023688 | 0.000358 | hypermethylated |
| cg15174552 | 0.19506 | 0.396504865 | 1.023421 | 3.76E-05 | hypermethylated |
| cg07300060 | 0.15688 | 0.318884324 | 1.023372 | 2.74E-05 | hypermethylated |
| cg09839170 | 0.17755 | 0.360875135 | 1.023274 | 0.000202 | hypermethylated |
| cg04541368 | 0.29748 | 0.604567027 | 1.02311  | 0.00024  | hypermethylated |
| cg01211065 | 0.16777 | 0.340932973 | 1.023003 | 8.84E-05 | hypermethylated |
| cg04316624 | 0.19193 | 0.38996973  | 1.022782 | 3.90E-06 | hypermethylated |
| cg03890222 | 0.14509 | 0.294786486 | 1.022722 | 0.000112 | hypermethylated |
| cg01759562 | 0.173   | 0.351416757 | 1.022411 | 0.000101 | hypermethylated |
| cg00297721 | 0.13294 | 0.269996216 | 1.022164 | 1.39E-05 | hypermethylated |
| cg22340508 | 0.23819 | 0.483738378 | 1.022114 | 4.42E-05 | hypermethylated |
| cg20026939 | 0.20344 | 0.413164324 | 1.022112 | 7.52E-06 | hypermethylated |
| cg05241015 | 0.16524 | 0.335558378 | 1.022001 | 8.26E-06 | hypermethylated |
| cg14737286 | 0.15749 | 0.319805405 | 1.021934 | 3.19E-05 | hypermethylated |
| cg09802066 | 0.18521 | 0.376094595 | 1.021934 | 2.54E-05 | hypermethylated |
| cg02478907 | 0.17642 | 0.358119459 | 1.021427 | 6.46E-05 | hypermethylated |
| cg20896728 | 0.12716 | 0.258088649 | 1.021222 | 7.56E-05 | hypermethylated |
| cg15979173 | 0.25152 | 0.510426486 | 1.02103  | 5.28E-06 | hypermethylated |
| cg13205528 | 0.13843 | 0.280917838 | 1.020992 | 6.15E-05 | hypermethylated |
| cg19786627 | 0.1679  | 0.340679459 | 1.020813 | 1.71E-05 | hypermethylated |
| cg01429449 | 0.21913 | 0.444594595 | 1.020703 | 4.47E-05 | hypermethylated |
| cg26509715 | 0.17453 | 0.354080541 | 1.020603 | 0.000191 | hypermethylated |
| cg24129390 | 0.28314 | 0.574311892 | 1.020319 | 1.94E-05 | hypermethylated |
| cg13924432 | 0.19621 | 0.397968649 | 1.020256 | 7.29E-05 | hypermethylated |
| cg02508651 | 0.20103 | 0.407730811 | 1.020206 | 2.51E-05 | hypermethylated |
| cg11346837 | 0.17079 | 0.346381622 | 1.020139 | 4.36E-05 | hypermethylated |
| cg00105628 | 0.16899 | 0.342660541 | 1.019842 | 9.27E-05 | hypermethylated |
| cg02150988 | 0.14738 | 0.298798378 | 1.019632 | 0.000517 | hypermethylated |
| cg01580681 | 0.19509 | 0.39549027  | 1.019502 | 2.85E-05 | hypermethylated |
| cg26917694 | 0.19705 | 0.399425405 | 1.019364 | 1.99E-05 | hypermethylated |
| cg22123464 | 0.22679 | 0.459511892 | 1.018745 | 0.000726 | hypermethylated |
| cg00803827 | 0.20978 | 0.425031892 | 1.018694 | 1.50E-05 | hypermethylated |
| cg04008601 | 0.21971 | 0.445114054 | 1.018575 | 0.000142 | hypermethylated |
| cg08567644 | 0.16201 | 0.328110811 | 1.0181   | 0.00043  | hypermethylated |
| cg15014975 | 0.20128 | 0.407568649 | 1.017839 | 0.000403 | hypermethylated |
| cg16945186 | 0.2733  | 0.553344865 | 1.017693 | 1.25E-05 | hypermethylated |
| cg11488401 | 0.11344 | 0.229602162 | 1.017207 | 2.15E-05 | hypermethylated |
| cg20997792 | 0.12993 | 0.262970811 | 1.017168 | 0.00012  | hypermethylated |
| cg08784129 | 0.16378 | 0.331456757 | 1.017061 | 0.000214 | hypermethylated |

|            |         |             |          |          |                 |
|------------|---------|-------------|----------|----------|-----------------|
| cg14870229 | 0.14236 | 0.288103784 | 1.017045 | 2.85E-05 | hypermethylated |
| cg11824921 | 0.16291 | 0.329634054 | 1.01679  | 0.000104 | hypermethylated |
| cg24469980 | 0.24232 | 0.490305405 | 1.016767 | 7.52E-06 | hypermethylated |
| cg18156592 | 0.22038 | 0.445899459 | 1.016725 | 4.26E-05 | hypermethylated |
| cg22450968 | 0.19149 | 0.387434595 | 1.016684 | 0.000104 | hypermethylated |
| cg23401445 | 0.20341 | 0.411541081 | 1.016646 | 3.59E-06 | hypermethylated |
| cg07380705 | 0.16406 | 0.331872973 | 1.016408 | 2.36E-06 | hypermethylated |
| cg15377283 | 0.24152 | 0.488481081 | 1.01616  | 4.94E-05 | hypermethylated |
| cg10420161 | 0.24574 | 0.496982162 | 1.016061 | 9.31E-06 | hypermethylated |
| cg05176667 | 0.17264 | 0.349087027 | 1.01582  | 0.000115 | hypermethylated |
| cg12983394 | 0.16092 | 0.325347027 | 1.015636 | 0.000166 | hypermethylated |
| cg06218338 | 0.1797  | 0.363316216 | 1.015635 | 0.000265 | hypermethylated |
| cg22538780 | 0.20835 | 0.421137838 | 1.015283 | 0.000174 | hypermethylated |
| cg17080163 | 0.21825 | 0.441144324 | 1.015269 | 0.00024  | hypermethylated |
| cg25913172 | 0.12484 | 0.252267027 | 1.014871 | 1.21E-05 | hypermethylated |
| cg04068980 | 0.22858 | 0.46184973  | 1.014724 | 4.58E-05 | hypermethylated |
| cg22268510 | 0.26893 | 0.543364324 | 1.014689 | 7.03E-06 | hypermethylated |
| cg21836358 | 0.25946 | 0.524184865 | 1.014564 | 6.39E-06 | hypermethylated |
| cg14380586 | 0.16574 | 0.334812973 | 1.014434 | 5.32E-05 | hypermethylated |
| cg08414570 | 0.1586  | 0.320388108 | 1.014428 | 1.94E-05 | hypermethylated |
| cg23588462 | 0.208   | 0.420098919 | 1.014146 | 1.64E-05 | hypermethylated |
| cg09410389 | 0.2162  | 0.436503784 | 1.013628 | 8.22E-05 | hypermethylated |
| cg07027430 | 0.21542 | 0.434881081 | 1.013469 | 4.26E-05 | hypermethylated |
| cg08721908 | 0.27261 | 0.550291351 | 1.013357 | 0.0002   | hypermethylated |
| cg16835233 | 0.1668  | 0.336687027 | 1.013289 | 3.95E-05 | hypermethylated |
| cg06544405 | 0.15006 | 0.302827027 | 1.012955 | 5.06E-05 | hypermethylated |
| cg14855972 | 0.16547 | 0.333913514 | 1.012905 | 0.000104 | hypermethylated |
| cg17722675 | 0.16476 | 0.332478919 | 1.012897 | 6.31E-05 | hypermethylated |
| cg07329360 | 0.25422 | 0.513000541 | 1.012883 | 1.42E-05 | hypermethylated |
| cg05581451 | 0.18058 | 0.364336216 | 1.012632 | 2.79E-06 | hypermethylated |
| cg09813610 | 0.13087 | 0.263998919 | 1.012398 | 3.54E-06 | hypermethylated |
| cg26343001 | 0.27046 | 0.545499459 | 1.012163 | 1.66E-05 | hypermethylated |
| cg10484958 | 0.19141 | 0.386048108 | 1.012114 | 0.000174 | hypermethylated |
| cg26879813 | 0.17186 | 0.346615676 | 1.012103 | 1.92E-05 | hypermethylated |
| cg08938584 | 0.19783 | 0.398802162 | 1.011412 | 2.15E-05 | hypermethylated |
| cg08363794 | 0.21631 | 0.436027568 | 1.011319 | 2.49E-06 | hypermethylated |
| cg23329272 | 0.13377 | 0.26964     | 1.01128  | 0.001635 | hypermethylated |
| cg02837536 | 0.2471  | 0.498036757 | 1.011157 | 0.000342 | hypermethylated |
| cg04046669 | 0.21441 | 0.43214     | 1.011127 | 5.28E-06 | hypermethylated |
| cg14511698 | 0.18613 | 0.375106486 | 1.01099  | 4.01E-06 | hypermethylated |
| cg08379987 | 0.25536 | 0.514604324 | 1.010931 | 2.92E-05 | hypermethylated |
| cg09521719 | 0.1877  | 0.378235135 | 1.010855 | 2.92E-05 | hypermethylated |
| cg27304406 | 0.13608 | 0.274194595 | 1.010745 | 0.000138 | hypermethylated |
| cg11874762 | 0.20255 | 0.408124324 | 1.010731 | 6.15E-05 | hypermethylated |
| cg11229185 | 0.17605 | 0.354681622 | 1.010539 | 0.000674 | hypermethylated |
| cg19407095 | 0.18449 | 0.371675676 | 1.010502 | 2.27E-05 | hypermethylated |
| cg23404248 | 0.1753  | 0.353159459 | 1.010494 | 6.78E-05 | hypermethylated |
| cg14514813 | 0.21096 | 0.424971892 | 1.010398 | 7.52E-06 | hypermethylated |
| cg12602633 | 0.24973 | 0.503008108 | 1.010213 | 5.12E-05 | hypermethylated |
| cg09522056 | 0.25401 | 0.511583243 | 1.010084 | 6.13E-06 | hypermethylated |
| cg05380019 | 0.22488 | 0.452869189 | 1.009939 | 7.93E-06 | hypermethylated |
| cg08143343 | 0.22684 | 0.456793514 | 1.009867 | 0.000187 | hypermethylated |
| cg06003656 | 0.13781 | 0.277483784 | 1.009723 | 0.000575 | hypermethylated |
| cg19119032 | 0.12187 | 0.245384324 | 1.0097   | 0.000209 | hypermethylated |
| cg02020829 | 0.14919 | 0.30038973  | 1.009685 | 3.40E-05 | hypermethylated |
| cg14008883 | 0.18741 | 0.377291351 | 1.009481 | 7.42E-06 | hypermethylated |
| cg10906284 | 0.18774 | 0.377862703 | 1.009126 | 7.20E-05 | hypermethylated |
| cg10862468 | 0.25492 | 0.513071351 | 1.009115 | 0.00098  | hypermethylated |



|            |         |             |          |          |                 |
|------------|---------|-------------|----------|----------|-----------------|
| cg11671688 | 0.25384 | 0.510871351 | 1.009041 | 1.50E-05 | hypermethylated |
| cg05342515 | 0.18288 | 0.368043243 | 1.008978 | 2.64E-05 | hypermethylated |
| cg24236591 | 0.13755 | 0.276784865 | 1.008809 | 0.000454 | hypermethylated |
| cg14738806 | 0.2727  | 0.548641081 | 1.008548 | 4.26E-05 | hypermethylated |
| cg10967350 | 0.18484 | 0.371858378 | 1.008476 | 1.80E-05 | hypermethylated |
| cg01610632 | 0.21868 | 0.439924324 | 1.008434 | 1.52E-05 | hypermethylated |
| cg24054190 | 0.17375 | 0.349527027 | 1.008391 | 0.000132 | hypermethylated |
| cg13051450 | 0.24254 | 0.487742162 | 1.007896 | 1.42E-05 | hypermethylated |
| cg19389953 | 0.1652  | 0.332212432 | 1.007892 | 2.10E-05 | hypermethylated |
| cg07301944 | 0.15157 | 0.304747027 | 1.007628 | 5.65E-05 | hypermethylated |
| cg11097541 | 0.19097 | 0.383898919 | 1.00738  | 4.73E-06 | hypermethylated |
| cg18369516 | 0.22024 | 0.442677838 | 1.007181 | 0.000135 | hypermethylated |
| cg23188704 | 0.2162  | 0.434537297 | 1.007113 | 3.35E-06 | hypermethylated |
| cg06284231 | 0.19437 | 0.390538378 | 1.006659 | 6.01E-05 | hypermethylated |
| cg26994225 | 0.16472 | 0.330938919 | 1.006549 | 0.000112 | hypermethylated |
| cg18720113 | 0.16323 | 0.327934054 | 1.006499 | 4.36E-05 | hypermethylated |
| cg04002608 | 0.16135 | 0.324137838 | 1.006414 | 4.94E-05 | hypermethylated |
| cg11575929 | 0.1602  | 0.321827027 | 1.006411 | 3.69E-06 | hypermethylated |
| cg23905216 | 0.17617 | 0.353880541 | 1.006294 | 0.000166 | hypermethylated |
| cg11412853 | 0.20288 | 0.407514054 | 1.006223 | 0.000287 | hypermethylated |
| cg00890363 | 0.21762 | 0.437075676 | 1.006072 | 3.85E-05 | hypermethylated |
| cg11700800 | 0.20217 | 0.406034595 | 1.006034 | 1.25E-05 | hypermethylated |
| cg06951626 | 0.20934 | 0.420384324 | 1.005861 | 8.42E-05 | hypermethylated |
| cg08523865 | 0.20792 | 0.417487027 | 1.005703 | 1.39E-05 | hypermethylated |
| cg18646365 | 0.17193 | 0.345194054 | 1.005586 | 0.000234 | hypermethylated |
| cg19188855 | 0.20761 | 0.416784324 | 1.005425 | 1.30E-05 | hypermethylated |
| cg12371933 | 0.15383 | 0.308748649 | 1.005096 | 7.84E-05 | hypermethylated |
| cg16902509 | 0.15126 | 0.303561622 | 1.004959 | 0.000109 | hypermethylated |
| cg00503302 | 0.21409 | 0.429592432 | 1.004751 | 1.56E-05 | hypermethylated |
| cg05457480 | 0.25537 | 0.512395135 | 1.004668 | 2.71E-05 | hypermethylated |
| cg05314679 | 0.17087 | 0.342836757 | 1.004623 | 5.51E-05 | hypermethylated |
| cg18805066 | 0.26846 | 0.538616216 | 1.004551 | 0.000399 | hypermethylated |
| cg00339682 | 0.18157 | 0.364273514 | 1.004496 | 2.71E-05 | hypermethylated |
| cg27626299 | 0.14082 | 0.282491351 | 1.004354 | 0.000155 | hypermethylated |
| cg01305913 | 0.16289 | 0.326750811 | 1.004293 | 0.000195 | hypermethylated |
| cg16600634 | 0.18348 | 0.368004324 | 1.0041   | 2.92E-05 | hypermethylated |
| cg24099067 | 0.20124 | 0.403615135 | 1.004063 | 3.04E-06 | hypermethylated |
| cg27277532 | 0.19383 | 0.388726486 | 1.003964 | 3.23E-05 | hypermethylated |
| cg13067553 | 0.18935 | 0.37973027  | 1.00392  | 0.001949 | hypermethylated |
| cg24468070 | 0.2146  | 0.430295135 | 1.003676 | 0.000256 | hypermethylated |
| cg17054060 | 0.32167 | 0.644898378 | 1.00349  | 4.24E-06 | hypermethylated |
| cg12351433 | 0.21865 | 0.438347027 | 1.00345  | 0.000198 | hypermethylated |
| cg05022688 | 0.15329 | 0.307296216 | 1.003366 | 2.38E-05 | hypermethylated |
| cg07803375 | 0.2701  | 0.541354054 | 1.003079 | 0.001031 | hypermethylated |
| cg09417809 | 0.23304 | 0.467025405 | 1.002923 | 1.50E-05 | hypermethylated |
| cg14783814 | 0.17103 | 0.342741622 | 1.002872 | 0.000182 | hypermethylated |
| cg00528572 | 0.21041 | 0.421642703 | 1.002818 | 0.000191 | hypermethylated |
| cg22639011 | 0.18    | 0.360603243 | 1.002415 | 5.19E-05 | hypermethylated |
| cg07928083 | 0.18789 | 0.376401081 | 1.002382 | 2.71E-05 | hypermethylated |
| cg03227021 | 0.19901 | 0.398676216 | 1.002377 | 1.06E-05 | hypermethylated |
| cg16051195 | 0.19831 | 0.397221622 | 1.002187 | 1.21E-05 | hypermethylated |
| cg12277278 | 0.15639 | 0.313241081 | 1.002125 | 0.000155 | hypermethylated |
| cg06921573 | 0.13949 | 0.279369189 | 1.002011 | 7.93E-05 | hypermethylated |
| cg26196480 | 0.20835 | 0.41725027  | 1.001904 | 0.000185 | hypermethylated |
| cg13586599 | 0.20248 | 0.405435676 | 1.001694 | 0.00029  | hypermethylated |
| cg13488201 | 0.21684 | 0.434175135 | 1.001646 | 6.14E-06 | hypermethylated |
| cg05722981 | 0.19006 | 0.380353514 | 1.000886 | 5.38E-05 | hypermethylated |
| cg15909981 | 0.18761 | 0.375445405 | 1.000866 | 3.00E-05 | hypermethylated |

|            |         |             |          |          |                 |
|------------|---------|-------------|----------|----------|-----------------|
| cg04461228 | 0.19375 | 0.387728649 | 1.000851 | 1.42E-05 | hypermethylated |
| cg11464895 | 0.22457 | 0.449266486 | 1.000406 | 2.85E-05 | hypermethylated |
| cg03826642 | 0.26571 | 0.53150973  | 1.000244 | 0.000191 | hypermethylated |
| cg06263495 | 0.18727 | 0.374568108 | 1.000108 | 0.000142 | hypermethylated |
| cg13266435 | 0.19478 | 0.389584324 | 1.00009  | 7.29E-05 | hypermethylated |
| cg14141458 | 0.13189 | 0.263795135 | 1.000083 | 0.000234 | hypermethylated |
| cg09267483 | 0.13959 | 0.27916973  | 0.999947 | 0.000506 | hypermethylated |
| cg24394856 | 0.2151  | 0.43012     | 0.999732 | 7.65E-05 | hypermethylated |
| cg02249292 | 0.17998 | 0.359890811 | 0.999723 | 2.48E-05 | hypermethylated |
| cg01811325 | 0.16887 | 0.337584865 | 0.999337 | 5.73E-06 | hypermethylated |
| cg03515663 | 0.21634 | 0.432442703 | 0.999209 | 6.75E-06 | hypermethylated |
| cg21233722 | 0.20143 | 0.402614054 | 0.999119 | 2.04E-05 | hypermethylated |
| cg09524946 | 0.20401 | 0.407743243 | 0.999021 | 0.000126 | hypermethylated |
| cg17450733 | 0.23228 | 0.464208649 | 0.998908 | 8.03E-05 | hypermethylated |
| cg21591624 | 0.17358 | 0.346897297 | 0.998908 | 9.57E-06 | hypermethylated |
| cg25148589 | 0.17882 | 0.357341622 | 0.998796 | 0.000132 | hypermethylated |
| cg16135989 | 0.25958 | 0.518706486 | 0.998739 | 6.31E-05 | hypermethylated |
| cg20707023 | 0.13475 | 0.269218378 | 0.998492 | 8.42E-05 | hypermethylated |
| cg16615154 | 0.22185 | 0.443183784 | 0.998321 | 8.37E-06 | hypermethylated |
| cg04938966 | 0.17641 | 0.352363243 | 0.998131 | 1.02E-05 | hypermethylated |
| cg10050816 | 0.17967 | 0.358781081 | 0.997754 | 5.86E-05 | hypermethylated |
| cg16918905 | 0.21451 | 0.428308108 | 0.997604 | 8.22E-05 | hypermethylated |
| cg04105250 | 0.15633 | 0.31213027  | 0.997554 | 6.62E-05 | hypermethylated |
| cg22967396 | 0.17537 | 0.349929189 | 0.996661 | 7.03E-06 | hypermethylated |
| cg19094243 | 0.17343 | 0.346036216 | 0.99657  | 0.000195 | hypermethylated |
| cg03585447 | 0.19031 | 0.379675676 | 0.996416 | 6.95E-05 | hypermethylated |
| cg09876519 | 0.20369 | 0.406365405 | 0.996402 | 1.92E-05 | hypermethylated |
| cg11826638 | 0.14628 | 0.291811892 | 0.996306 | 1.84E-05 | hypermethylated |
| cg15174623 | 0.19285 | 0.384685946 | 0.996202 | 9.69E-06 | hypermethylated |
| cg12962191 | 0.17203 | 0.343138378 | 0.99613  | 0.000224 | hypermethylated |
| cg08988179 | 0.13124 | 0.261774054 | 0.996115 | 8.03E-05 | hypermethylated |
| cg09032973 | 0.2438  | 0.486236757 | 0.995961 | 1.09E-06 | hypermethylated |
| cg10245879 | 0.18093 | 0.360838919 | 0.995923 | 8.84E-05 | hypermethylated |
| cg02749463 | 0.21356 | 0.425869189 | 0.995769 | 0.001395 | hypermethylated |
| cg04308769 | 0.26302 | 0.524412973 | 0.995531 | 1.28E-05 | hypermethylated |
| cg12613383 | 0.16541 | 0.329785405 | 0.995481 | 9.49E-05 | hypermethylated |
| cg05981335 | 0.21059 | 0.419862162 | 0.995479 | 2.64E-06 | hypermethylated |
| cg20756891 | 0.20831 | 0.415267027 | 0.995307 | 7.12E-06 | hypermethylated |
| cg00604202 | 0.17699 | 0.352818919 | 0.99526  | 1.50E-05 | hypermethylated |
| cg19830270 | 0.18947 | 0.377607027 | 0.994916 | 2.71E-05 | hypermethylated |
| cg11400953 | 0.20473 | 0.408005405 | 0.994866 | 0.00039  | hypermethylated |
| cg11842415 | 0.20676 | 0.412041622 | 0.994833 | 0.0002   | hypermethylated |
| cg26365545 | 0.24462 | 0.487396216 | 0.994553 | 4.24E-06 | hypermethylated |
| cg17611193 | 0.18316 | 0.364923784 | 0.994491 | 8.94E-05 | hypermethylated |
| cg14434870 | 0.15104 | 0.300923243 | 0.994465 | 2.21E-05 | hypermethylated |
| cg24935332 | 0.25013 | 0.498230811 | 0.994136 | 6.02E-07 | hypermethylated |
| cg02867763 | 0.17777 | 0.354091351 | 0.99411  | 0.000104 | hypermethylated |
| cg21051580 | 0.19992 | 0.398098919 | 0.993704 | 1.09E-05 | hypermethylated |
| cg07150445 | 0.13811 | 0.274904865 | 0.993115 | 2.78E-05 | hypermethylated |
| cg18299578 | 0.15962 | 0.317635676 | 0.992732 | 5.58E-06 | hypermethylated |
| cg05223604 | 0.11901 | 0.236808649 | 0.992639 | 2.04E-05 | hypermethylated |
| cg01624414 | 0.18948 | 0.377004865 | 0.992538 | 0.000335 | hypermethylated |
| cg17017189 | 0.24034 | 0.478192973 | 0.992516 | 1.23E-05 | hypermethylated |
| cg13908315 | 0.1629  | 0.324031351 | 0.992147 | 0.000259 | hypermethylated |
| cg02844545 | 0.16796 | 0.334077838 | 0.992067 | 1.42E-05 | hypermethylated |
| cg02128112 | 0.18249 | 0.362944865 | 0.991933 | 1.14E-05 | hypermethylated |
| cg04181546 | 0.16925 | 0.336592432 | 0.991847 | 1.54E-05 | hypermethylated |
| cg01337391 | 0.16821 | 0.334464324 | 0.991589 | 2.35E-05 | hypermethylated |

|            |         |             |          |          |                 |
|------------|---------|-------------|----------|----------|-----------------|
| cg06911487 | 0.18264 | 0.363145405 | 0.991545 | 0.000152 | hypermethylated |
| cg18182111 | 0.20216 | 0.401923243 | 0.991422 | 2.96E-05 | hypermethylated |
| cg04365721 | 0.18445 | 0.36666     | 0.991213 | 3.49E-06 | hypermethylated |
| cg14028400 | 0.25662 | 0.510054054 | 0.991017 | 4.01E-06 | hypermethylated |
| cg11280525 | 0.15502 | 0.308074054 | 0.990823 | 3.00E-05 | hypermethylated |
| cg11248896 | 0.22537 | 0.447878378 | 0.990812 | 8.83E-06 | hypermethylated |
| cg27117509 | 0.24171 | 0.480316757 | 0.990709 | 4.88E-05 | hypermethylated |
| cg18731327 | 0.1841  | 0.365802703 | 0.990576 | 9.31E-06 | hypermethylated |
| cg24115032 | 0.16883 | 0.335418919 | 0.990393 | 6.93E-06 | hypermethylated |
| cg11881313 | 0.12767 | 0.253631351 | 0.990314 | 0.000126 | hypermethylated |
| cg09232937 | 0.19407 | 0.385428649 | 0.989887 | 1.01E-05 | hypermethylated |
| cg22859289 | 0.21198 | 0.420957297 | 0.989746 | 0.000313 | hypermethylated |
| cg00157572 | 0.20794 | 0.412865405 | 0.989504 | 2.91E-06 | hypermethylated |
| cg17018946 | 0.20413 | 0.405221622 | 0.989223 | 6.01E-05 | hypermethylated |
| cg10018615 | 0.13646 | 0.270880541 | 0.989179 | 4.47E-05 | hypermethylated |
| cg05237641 | 0.22456 | 0.445645946 | 0.988797 | 5.28E-06 | hypermethylated |
| cg14832406 | 0.17468 | 0.346608649 | 0.988593 | 5.58E-05 | hypermethylated |
| cg27125849 | 0.17738 | 0.351954054 | 0.988544 | 0.000242 | hypermethylated |
| cg17807479 | 0.17223 | 0.341629189 | 0.988095 | 0.000822 | hypermethylated |
| cg04834436 | 0.23695 | 0.469983784 | 0.988028 | 3.85E-05 | hypermethylated |
| cg11201710 | 0.16873 | 0.334656757 | 0.987966 | 0.000224 | hypermethylated |
| cg23341223 | 0.17838 | 0.353768649 | 0.987852 | 3.90E-05 | hypermethylated |
| cg02285263 | 0.12669 | 0.251251351 | 0.987829 | 0.001481 | hypermethylated |
| cg09083947 | 0.22205 | 0.440239459 | 0.987404 | 4.15E-05 | hypermethylated |
| cg00107187 | 0.14906 | 0.295527568 | 0.9874   | 9.72E-05 | hypermethylated |
| cg17918544 | 0.18884 | 0.374358378 | 0.987256 | 6.31E-05 | hypermethylated |
| cg04645914 | 0.25785 | 0.511153514 | 0.987225 | 2.32E-05 | hypermethylated |
| cg01449136 | 0.21056 | 0.417362703 | 0.98707  | 6.22E-06 | hypermethylated |
| cg20748533 | 0.24685 | 0.489285405 | 0.987042 | 0.00012  | hypermethylated |
| cg22517995 | 0.17207 | 0.341018378 | 0.986854 | 1.75E-05 | hypermethylated |
| cg26324366 | 0.12216 | 0.242096216 | 0.986809 | 4.15E-05 | hypermethylated |
| cg15713103 | 0.15551 | 0.308182162 | 0.986776 | 5.45E-05 | hypermethylated |
| cg07569216 | 0.2061  | 0.408422703 | 0.986719 | 0.000214 | hypermethylated |
| cg27639030 | 0.15229 | 0.301782703 | 0.986689 | 1.56E-05 | hypermethylated |
| cg13321077 | 0.24134 | 0.478225946 | 0.986625 | 4.60E-06 | hypermethylated |
| cg15808426 | 0.21491 | 0.425843784 | 0.986592 | 1.18E-05 | hypermethylated |
| cg06117072 | 0.21427 | 0.424573514 | 0.986585 | 1.04E-05 | hypermethylated |
| cg04751631 | 0.19352 | 0.383450811 | 0.986559 | 0.00064  | hypermethylated |
| cg14750066 | 0.19258 | 0.381541081 | 0.986381 | 3.95E-05 | hypermethylated |
| cg14300730 | 0.19333 | 0.382982162 | 0.986212 | 6.31E-05 | hypermethylated |
| cg10441628 | 0.17006 | 0.336868108 | 0.98614  | 0.000209 | hypermethylated |
| cg08713073 | 0.1876  | 0.371598919 | 0.986086 | 4.76E-05 | hypermethylated |
| cg16747564 | 0.1583  | 0.313504865 | 0.985827 | 2.02E-05 | hypermethylated |
| cg07883457 | 0.23178 | 0.459023784 | 0.985813 | 1.29E-06 | hypermethylated |
| cg26261502 | 0.1872  | 0.370732973 | 0.9858   | 2.15E-05 | hypermethylated |
| cg13558371 | 0.19743 | 0.390858378 | 0.985305 | 0.000287 | hypermethylated |
| cg09661370 | 0.22911 | 0.453558919 | 0.98525  | 1.18E-05 | hypermethylated |
| cg13167730 | 0.17761 | 0.351572973 | 0.985111 | 7.41E-06 | hypermethylated |
| cg07915884 | 0.29143 | 0.576821081 | 0.984974 | 1.26E-05 | hypermethylated |
| cg09191036 | 0.22297 | 0.441239459 | 0.984712 | 2.92E-05 | hypermethylated |
| cg16347279 | 0.18588 | 0.367834054 | 0.984684 | 4.88E-05 | hypermethylated |
| cg13740815 | 0.21421 | 0.423888649 | 0.98466  | 3.67E-05 | hypermethylated |
| cg14385245 | 0.16824 | 0.332776216 | 0.984032 | 8.83E-06 | hypermethylated |
| cg00049047 | 0.19943 | 0.394417838 | 0.983842 | 6.46E-05 | hypermethylated |
| cg04167239 | 0.20052 | 0.396566486 | 0.983817 | 7.72E-06 | hypermethylated |
| cg06649410 | 0.1733  | 0.342711351 | 0.983722 | 5.86E-05 | hypermethylated |
| cg08552214 | 0.18035 | 0.356633514 | 0.983643 | 0.000626 | hypermethylated |
| cg04166294 | 0.20895 | 0.413140541 | 0.983475 | 3.85E-05 | hypermethylated |

|            |         |             |          |          |                 |
|------------|---------|-------------|----------|----------|-----------------|
| cg00918522 | 0.20958 | 0.414336757 | 0.983303 | 5.19E-05 | hypermethylated |
| cg24907814 | 0.17772 | 0.351306486 | 0.983124 | 3.39E-06 | hypermethylated |
| cg24931520 | 0.16468 | 0.325498919 | 0.982987 | 4.47E-05 | hypermethylated |
| cg00868523 | 0.20563 | 0.406398378 | 0.982844 | 4.82E-05 | hypermethylated |
| cg20171396 | 0.22957 | 0.453710811 | 0.982839 | 2.32E-05 | hypermethylated |
| cg23815900 | 0.14998 | 0.296397297 | 0.982762 | 0.000107 | hypermethylated |
| cg07546916 | 0.17358 | 0.342965405 | 0.982462 | 0.000122 | hypermethylated |
| cg13777681 | 0.15827 | 0.31268     | 0.982299 | 8.03E-05 | hypermethylated |
| cg14289511 | 0.17783 | 0.351247568 | 0.98199  | 0.001275 | hypermethylated |
| cg07398767 | 0.16142 | 0.318826486 | 0.981952 | 0.000204 | hypermethylated |
| cg26365925 | 0.23583 | 0.465723243 | 0.981726 | 1.01E-05 | hypermethylated |
| cg07750560 | 0.19754 | 0.390054054 | 0.981529 | 5.45E-05 | hypermethylated |
| cg16700282 | 0.18815 | 0.371491892 | 0.981447 | 5.73E-06 | hypermethylated |
| cg01059449 | 0.19345 | 0.38194973  | 0.981422 | 8.37E-06 | hypermethylated |
| cg05022059 | 0.18864 | 0.372374054 | 0.981117 | 0.000174 | hypermethylated |
| cg18089569 | 0.14152 | 0.279262703 | 0.980617 | 0.000107 | hypermethylated |
| cg01815567 | 0.25792 | 0.50892     | 0.980515 | 0.000172 | hypermethylated |
| cg16006349 | 0.23024 | 0.454212973 | 0.98023  | 3.62E-05 | hypermethylated |
| cg16557178 | 0.20299 | 0.400416757 | 0.980094 | 1.39E-05 | hypermethylated |
| cg17882660 | 0.19742 | 0.389412973 | 0.980033 | 6.08E-05 | hypermethylated |
| cg18824990 | 0.1803  | 0.355632432 | 0.979988 | 0.0002   | hypermethylated |
| cg20256245 | 0.13582 | 0.267851892 | 0.97974  | 2.18E-05 | hypermethylated |
| cg22978515 | 0.24241 | 0.47797027  | 0.979472 | 0.000893 | hypermethylated |
| cg04112787 | 0.17995 | 0.354806486 | 0.979436 | 7.47E-05 | hypermethylated |
| cg03894892 | 0.24482 | 0.482656216 | 0.979275 | 2.15E-05 | hypermethylated |
| cg11015251 | 0.2504  | 0.493508108 | 0.978839 | 1.12E-05 | hypermethylated |
| cg08076125 | 0.19838 | 0.390981081 | 0.978832 | 0.000287 | hypermethylated |
| cg18952647 | 0.18782 | 0.370147568 | 0.97875  | 0.000268 | hypermethylated |
| cg17554126 | 0.15843 | 0.312208649 | 0.978665 | 1.44E-05 | hypermethylated |
| cg01106338 | 0.17829 | 0.351338919 | 0.978638 | 1.99E-05 | hypermethylated |
| cg02928664 | 0.23546 | 0.463815676 | 0.97807  | 0.000219 | hypermethylated |
| cg01016119 | 0.20579 | 0.405313514 | 0.977865 | 0.000382 | hypermethylated |
| cg13965328 | 0.13705 | 0.269855676 | 0.977486 | 0.000154 | hypermethylated |
| cg25751787 | 0.16778 | 0.330335135 | 0.97736  | 9.82E-06 | hypermethylated |
| cg04543289 | 0.20443 | 0.402479459 | 0.977308 | 1.84E-05 | hypermethylated |
| cg04290586 | 0.22981 | 0.452404324 | 0.977171 | 1.09E-05 | hypermethylated |
| cg20399871 | 0.17392 | 0.342374595 | 0.977152 | 1.25E-05 | hypermethylated |
| cg12065138 | 0.20705 | 0.407546486 | 0.976985 | 0.000161 | hypermethylated |
| cg01220680 | 0.16836 | 0.331347568 | 0.976796 | 0.000155 | hypermethylated |
| cg00946245 | 0.12822 | 0.252344324 | 0.976772 | 9.49E-05 | hypermethylated |
| cg11391201 | 0.1718  | 0.338098378 | 0.976713 | 8.15E-06 | hypermethylated |
| cg13561879 | 0.26795 | 0.527216757 | 0.976432 | 0.000135 | hypermethylated |
| cg07997434 | 0.20135 | 0.396161081 | 0.976382 | 0.000667 | hypermethylated |
| cg13368923 | 0.19488 | 0.383406486 | 0.976289 | 9.05E-05 | hypermethylated |
| cg25942450 | 0.22354 | 0.439758919 | 0.97618  | 1.72E-06 | hypermethylated |
| cg00409356 | 0.15381 | 0.302577297 | 0.976154 | 0.000127 | hypermethylated |
| cg00495775 | 0.17894 | 0.35197027  | 0.975978 | 3.44E-06 | hypermethylated |
| cg23061046 | 0.16428 | 0.323128108 | 0.975949 | 4.58E-05 | hypermethylated |
| cg01033938 | 0.14163 | 0.278533514 | 0.975724 | 4.82E-05 | hypermethylated |
| cg16072688 | 0.16289 | 0.320336216 | 0.975689 | 0.000115 | hypermethylated |
| cg08064488 | 0.18261 | 0.359092973 | 0.975592 | 2.27E-05 | hypermethylated |
| cg18581378 | 0.19384 | 0.381101622 | 0.975309 | 8.22E-05 | hypermethylated |
| cg01530605 | 0.20614 | 0.405270811 | 0.975262 | 7.75E-05 | hypermethylated |
| cg07119829 | 0.16973 | 0.333684865 | 0.975245 | 4.15E-05 | hypermethylated |
| cg18524739 | 0.15901 | 0.312444865 | 0.974484 | 3.85E-05 | hypermethylated |
| cg26574334 | 0.17932 | 0.35228     | 0.974186 | 5.19E-05 | hypermethylated |
| cg07603511 | 0.23512 | 0.461771351 | 0.973781 | 4.24E-06 | hypermethylated |
| cg00705059 | 0.1899  | 0.372958378 | 0.973775 | 9.05E-05 | hypermethylated |

|            |         |             |          |          |                 |
|------------|---------|-------------|----------|----------|-----------------|
| cg20381975 | 0.17544 | 0.344452432 | 0.973327 | 6.30E-06 | hypermethylated |
| cg00662556 | 0.18103 | 0.35526     | 0.972646 | 6.22E-06 | hypermethylated |
| cg26214742 | 0.26864 | 0.527110811 | 0.972432 | 7.12E-06 | hypermethylated |
| cg06701529 | 0.23919 | 0.469268649 | 0.972257 | 3.23E-05 | hypermethylated |
| cg11703632 | 0.17194 | 0.337236216 | 0.971854 | 9.72E-05 | hypermethylated |
| cg05547902 | 0.17159 | 0.336503784 | 0.971657 | 5.00E-05 | hypermethylated |
| cg03144922 | 0.23659 | 0.463965405 | 0.971628 | 1.66E-05 | hypermethylated |
| cg02184008 | 0.17886 | 0.350623243 | 0.971091 | 2.96E-05 | hypermethylated |
| cg25987208 | 0.22199 | 0.435156757 | 0.971041 | 6.15E-05 | hypermethylated |
| cg24283289 | 0.25049 | 0.491010811 | 0.971002 | 1.94E-05 | hypermethylated |
| cg13647052 | 0.15055 | 0.295069189 | 0.970811 | 7.65E-05 | hypermethylated |
| cg17457637 | 0.18588 | 0.364300541 | 0.970758 | 1.62E-05 | hypermethylated |
| cg15794859 | 0.19402 | 0.380233514 | 0.97068  | 4.42E-05 | hypermethylated |
| cg17991695 | 0.1905  | 0.37320973  | 0.970196 | 1.46E-05 | hypermethylated |
| cg14422827 | 0.18169 | 0.355917838 | 0.970065 | 0.000191 | hypermethylated |
| cg06566775 | 0.17217 | 0.337265405 | 0.970051 | 6.46E-05 | hypermethylated |
| cg14144025 | 0.18351 | 0.359471892 | 0.97002  | 4.70E-05 | hypermethylated |
| cg02415779 | 0.33195 | 0.650141081 | 0.969787 | 0.000107 | hypermethylated |
| cg27016494 | 0.21995 | 0.430768108 | 0.969736 | 4.48E-06 | hypermethylated |
| cg22488849 | 0.1815  | 0.355347568 | 0.969261 | 4.24E-06 | hypermethylated |
| cg18612627 | 0.19587 | 0.383478919 | 0.969251 | 2.10E-05 | hypermethylated |
| cg07899681 | 0.23311 | 0.456315135 | 0.96902  | 2.04E-05 | hypermethylated |
| cg03127416 | 0.20531 | 0.401830811 | 0.968784 | 1.30E-05 | hypermethylated |
| cg16236679 | 0.11073 | 0.216712432 | 0.968736 | 0.000107 | hypermethylated |
| cg06525987 | 0.19632 | 0.384158378 | 0.968494 | 0.000195 | hypermethylated |
| cg20587394 | 0.15662 | 0.306467568 | 0.968466 | 7.03E-05 | hypermethylated |
| cg09368188 | 0.19213 | 0.375931892 | 0.968389 | 3.95E-05 | hypermethylated |
| cg01460202 | 0.216   | 0.422623784 | 0.968343 | 4.36E-06 | hypermethylated |
| cg06382559 | 0.18201 | 0.356007027 | 0.967888 | 5.86E-05 | hypermethylated |
| cg13974394 | 0.17749 | 0.347133514 | 0.967753 | 1.30E-05 | hypermethylated |
| cg18391323 | 0.16912 | 0.330751351 | 0.9677   | 6.39E-06 | hypermethylated |
| cg16179952 | 0.22574 | 0.44146     | 0.967621 | 4.86E-06 | hypermethylated |
| cg03682719 | 0.22848 | 0.446811351 | 0.967598 | 1.75E-05 | hypermethylated |
| cg05715492 | 0.1891  | 0.369752973 | 0.967412 | 0.004691 | hypermethylated |
| cg16497340 | 0.15606 | 0.305137297 | 0.967358 | 8.37E-06 | hypermethylated |
| cg06987468 | 0.16052 | 0.313848649 | 0.967316 | 0.000342 | hypermethylated |
| cg08380411 | 0.16163 | 0.316018378 | 0.967313 | 0.000161 | hypermethylated |
| cg01486146 | 0.16571 | 0.323798919 | 0.966438 | 5.72E-05 | hypermethylated |
| cg19064523 | 0.22254 | 0.434836757 | 0.966409 | 6.22E-06 | hypermethylated |
| cg22513901 | 0.18289 | 0.357158378 | 0.965588 | 6.57E-06 | hypermethylated |
| cg16154416 | 0.16233 | 0.316986486 | 0.965492 | 2.32E-05 | hypermethylated |
| cg10052561 | 0.22635 | 0.441943784 | 0.965308 | 0.000174 | hypermethylated |
| cg20707630 | 0.15762 | 0.307721622 | 0.965175 | 8.63E-05 | hypermethylated |
| cg23093609 | 0.17037 | 0.332564324 | 0.964962 | 8.15E-06 | hypermethylated |
| cg15105326 | 0.21959 | 0.428614595 | 0.964869 | 9.07E-06 | hypermethylated |
| cg00715696 | 0.23772 | 0.46398     | 0.964799 | 1.84E-05 | hypermethylated |
| cg15769184 | 0.15128 | 0.295194595 | 0.964445 | 8.13E-05 | hypermethylated |
| cg21579274 | 0.1925  | 0.3756      | 0.964339 | 5.51E-05 | hypermethylated |
| cg00569447 | 0.20163 | 0.393294595 | 0.9639   | 1.89E-05 | hypermethylated |
| cg17019053 | 0.23178 | 0.452067568 | 0.963782 | 2.45E-05 | hypermethylated |
| cg18811550 | 0.24005 | 0.468182703 | 0.963737 | 1.80E-05 | hypermethylated |
| cg13486820 | 0.17999 | 0.351001081 | 0.963559 | 2.27E-05 | hypermethylated |
| cg04228468 | 0.21126 | 0.411966486 | 0.963507 | 0.000104 | hypermethylated |
| cg08049853 | 0.25718 | 0.501490811 | 0.963445 | 2.10E-05 | hypermethylated |
| cg26581714 | 0.25813 | 0.503317297 | 0.96337  | 7.12E-06 | hypermethylated |
| cg00178249 | 0.25198 | 0.491323784 | 0.963365 | 1.21E-05 | hypermethylated |
| cg18160072 | 0.12507 | 0.243851351 | 0.963266 | 0.00018  | hypermethylated |
| cg13736376 | 0.17192 | 0.335184324 | 0.963217 | 8.22E-05 | hypermethylated |

|            |         |             |          |          |                 |
|------------|---------|-------------|----------|----------|-----------------|
| cg26668276 | 0.1921  | 0.374460541 | 0.962956 | 8.42E-05 | hypermethylated |
| cg12563372 | 0.23997 | 0.467754054 | 0.962896 | 0.000112 | hypermethylated |
| cg10625533 | 0.16398 | 0.319583243 | 0.962672 | 0.000242 | hypermethylated |
| cg01824466 | 0.30422 | 0.592891351 | 0.962653 | 1.94E-05 | hypermethylated |
| cg06760830 | 0.22259 | 0.433767027 | 0.962532 | 3.85E-05 | hypermethylated |
| cg00481951 | 0.16505 | 0.321631892 | 0.962507 | 0.000741 | hypermethylated |
| cg19969606 | 0.15152 | 0.295261622 | 0.962486 | 9.72E-05 | hypermethylated |
| cg11112161 | 0.20301 | 0.395594595 | 0.962472 | 0.000283 | hypermethylated |
| cg16857801 | 0.19195 | 0.373938378 | 0.96207  | 3.57E-05 | hypermethylated |
| cg18184411 | 0.17947 | 0.349591351 | 0.961927 | 8.42E-05 | hypermethylated |
| cg25297303 | 0.1501  | 0.292352432 | 0.961785 | 4.82E-05 | hypermethylated |
| cg27013696 | 0.22452 | 0.437278378 | 0.961708 | 2.05E-06 | hypermethylated |
| cg10568624 | 0.19895 | 0.387467027 | 0.961668 | 0.000459 | hypermethylated |
| cg15400655 | 0.19681 | 0.383097297 | 0.960907 | 6.15E-05 | hypermethylated |
| cg07072366 | 0.15562 | 0.30289027  | 0.960768 | 7.38E-05 | hypermethylated |
| cg18242103 | 0.20804 | 0.404863243 | 0.960574 | 0.000166 | hypermethylated |
| cg21483110 | 0.17371 | 0.337980541 | 0.960259 | 1.71E-05 | hypermethylated |
| cg00321480 | 0.18003 | 0.350265946 | 0.960213 | 0.000399 | hypermethylated |
| cg05828005 | 0.21168 | 0.411809189 | 0.960091 | 1.89E-05 | hypermethylated |
| cg19395056 | 0.20815 | 0.40482973  | 0.959692 | 1.80E-05 | hypermethylated |
| cg01354473 | 0.232   | 0.451173514 | 0.959558 | 2.16E-06 | hypermethylated |
| cg02935338 | 0.21312 | 0.414441081 | 0.959501 | 3.49E-05 | hypermethylated |
| cg23085662 | 0.20274 | 0.394168108 | 0.95918  | 3.32E-05 | hypermethylated |
| cg10679688 | 0.21546 | 0.418867027 | 0.959072 | 5.72E-05 | hypermethylated |
| cg26469608 | 0.1938  | 0.376718378 | 0.958918 | 4.26E-05 | hypermethylated |
| cg24414788 | 0.19095 | 0.371048108 | 0.958411 | 2.92E-05 | hypermethylated |
| cg11735997 | 0.19533 | 0.379528649 | 0.958295 | 8.95E-06 | hypermethylated |
| cg07078225 | 0.19984 | 0.388194595 | 0.957935 | 0.001875 | hypermethylated |
| cg05258489 | 0.09908 | 0.19246     | 0.957893 | 0.000165 | hypermethylated |
| cg02065637 | 0.21672 | 0.420849189 | 0.957471 | 8.22E-05 | hypermethylated |
| cg11282657 | 0.22042 | 0.427985405 | 0.957306 | 2.51E-05 | hypermethylated |
| cg04188862 | 0.32775 | 0.636301622 | 0.957115 | 4.24E-06 | hypermethylated |
| cg04674956 | 0.2502  | 0.485698919 | 0.95698  | 1.18E-05 | hypermethylated |
| cg11827453 | 0.18615 | 0.361340541 | 0.956894 | 0.000178 | hypermethylated |
| cg00157199 | 0.28628 | 0.555377838 | 0.956043 | 0.00018  | hypermethylated |
| cg19385090 | 0.26979 | 0.523364324 | 0.955979 | 2.24E-05 | hypermethylated |
| cg25930591 | 0.15406 | 0.298812432 | 0.955748 | 7.93E-05 | hypermethylated |
| cg18815647 | 0.22663 | 0.439567027 | 0.955744 | 1.46E-05 | hypermethylated |
| cg22455694 | 0.17771 | 0.344551892 | 0.955196 | 1.28E-05 | hypermethylated |
| cg00468146 | 0.16079 | 0.311655135 | 0.954773 | 0.000271 | hypermethylated |
| cg11174851 | 0.13814 | 0.267718378 | 0.954585 | 1.46E-05 | hypermethylated |
| cg01257975 | 0.22015 | 0.426426486 | 0.95381  | 3.53E-05 | hypermethylated |
| cg03107393 | 0.2388  | 0.462542162 | 0.953782 | 0.000207 | hypermethylated |
| cg17630392 | 0.20395 | 0.395035135 | 0.953765 | 1.29E-06 | hypermethylated |
| cg17669581 | 0.2002  | 0.387736757 | 0.953636 | 0.000195 | hypermethylated |
| cg18987335 | 0.15956 | 0.309004324 | 0.953528 | 5.79E-05 | hypermethylated |
| cg03692563 | 0.26214 | 0.507601622 | 0.953359 | 5.73E-06 | hypermethylated |
| cg06596654 | 0.24221 | 0.468965405 | 0.953223 | 6.39E-06 | hypermethylated |
| cg14127859 | 0.21448 | 0.415270811 | 0.953209 | 0.000135 | hypermethylated |
| cg18560204 | 0.20985 | 0.406285405 | 0.953135 | 1.08E-05 | hypermethylated |
| cg26299084 | 0.18233 | 0.35298     | 0.953034 | 0.000517 | hypermethylated |
| cg04247603 | 0.17382 | 0.336503243 | 0.953026 | 3.36E-05 | hypermethylated |
| cg18263365 | 0.20924 | 0.405048649 | 0.952937 | 1.99E-05 | hypermethylated |
| cg04637478 | 0.2056  | 0.39796973  | 0.952818 | 3.00E-05 | hypermethylated |
| cg04467618 | 0.2341  | 0.453134595 | 0.952815 | 5.28E-06 | hypermethylated |
| cg04268950 | 0.21152 | 0.409403243 | 0.952728 | 1.06E-05 | hypermethylated |
| cg02026608 | 0.14131 | 0.273504865 | 0.952703 | 8.73E-05 | hypermethylated |
| cg16656895 | 0.21078 | 0.407958919 | 0.952686 | 2.39E-06 | hypermethylated |

|            |         |             |          |          |                 |
|------------|---------|-------------|----------|----------|-----------------|
| cg09232478 | 0.23686 | 0.458422162 | 0.952642 | 7.47E-05 | hypermethylated |
| cg20414186 | 0.17145 | 0.331718378 | 0.952171 | 0.000335 | hypermethylated |
| cg13319711 | 0.23225 | 0.449301622 | 0.952006 | 1.25E-05 | hypermethylated |
| cg26702958 | 0.1821  | 0.352268108 | 0.951943 | 0.000335 | hypermethylated |
| cg24527098 | 0.18628 | 0.360322162 | 0.951815 | 6.31E-05 | hypermethylated |
| cg08801795 | 0.15233 | 0.294645946 | 0.951782 | 1.21E-05 | hypermethylated |
| cg19942495 | 0.22993 | 0.44473027  | 0.951736 | 6.75E-06 | hypermethylated |
| cg22763680 | 0.21896 | 0.423480541 | 0.951628 | 2.13E-05 | hypermethylated |
| cg15746583 | 0.12494 | 0.241640541 | 0.951627 | 0.000378 | hypermethylated |
| cg23546474 | 0.23453 | 0.453555135 | 0.951505 | 0.000126 | hypermethylated |
| cg00457913 | 0.1606  | 0.310545946 | 0.951335 | 0.000265 | hypermethylated |
| cg15324651 | 0.18331 | 0.354420541 | 0.951177 | 1.54E-05 | hypermethylated |
| cg04274288 | 0.17364 | 0.33562973  | 0.950771 | 3.57E-05 | hypermethylated |
| cg16648632 | 0.196   | 0.378819459 | 0.950657 | 4.70E-05 | hypermethylated |
| cg11811610 | 0.18693 | 0.361234595 | 0.950438 | 2.79E-06 | hypermethylated |
| cg01150433 | 0.20211 | 0.390487568 | 0.950136 | 1.66E-05 | hypermethylated |
| cg09799571 | 0.21051 | 0.406687027 | 0.95003  | 8.22E-05 | hypermethylated |
| cg03408271 | 0.16585 | 0.320404865 | 0.950017 | 2.24E-05 | hypermethylated |
| cg17603689 | 0.2299  | 0.444142703 | 0.950017 | 6.05E-06 | hypermethylated |
| cg02490989 | 0.1956  | 0.37786973  | 0.949983 | 0.000216 | hypermethylated |
| cg15288618 | 0.17505 | 0.338158378 | 0.949932 | 5.45E-05 | hypermethylated |
| cg25378939 | 0.12115 | 0.234       | 0.949714 | 3.32E-05 | hypermethylated |
| cg01157046 | 0.32883 | 0.635085405 | 0.949609 | 2.10E-06 | hypermethylated |
| cg06738242 | 0.20261 | 0.391258919 | 0.949418 | 0.000166 | hypermethylated |
| cg01178624 | 0.3343  | 0.645509189 | 0.949294 | 7.29E-05 | hypermethylated |
| cg25334575 | 0.20815 | 0.401855676 | 0.949054 | 6.62E-05 | hypermethylated |
| cg15936446 | 0.22902 | 0.442129189 | 0.948994 | 8.32E-05 | hypermethylated |
| cg26913248 | 0.18619 | 0.359405946 | 0.948839 | 0.000306 | hypermethylated |
| cg23093589 | 0.22451 | 0.433370811 | 0.948822 | 0.000107 | hypermethylated |
| cg04981696 | 0.13531 | 0.261177297 | 0.948761 | 0.000152 | hypermethylated |
| cg03093838 | 0.19863 | 0.383377297 | 0.948681 | 7.52E-06 | hypermethylated |
| cg03726556 | 0.2182  | 0.421045946 | 0.948327 | 1.56E-05 | hypermethylated |
| cg04635983 | 0.21434 | 0.41359027  | 0.948301 | 1.54E-06 | hypermethylated |
| cg17524151 | 0.10196 | 0.196735676 | 0.948255 | 0.000111 | hypermethylated |
| cg23429510 | 0.1894  | 0.365454054 | 0.948254 | 8.42E-05 | hypermethylated |
| cg20372690 | 0.16495 | 0.318165405 | 0.947748 | 2.15E-05 | hypermethylated |
| cg03215422 | 0.25146 | 0.485028108 | 0.947739 | 2.42E-06 | hypermethylated |
| cg01152019 | 0.16365 | 0.315551351 | 0.947261 | 0.000327 | hypermethylated |
| cg14713139 | 0.17766 | 0.342522162 | 0.947078 | 1.46E-05 | hypermethylated |
| cg14631053 | 0.23875 | 0.460272432 | 0.946987 | 1.48E-05 | hypermethylated |
| cg06792417 | 0.15696 | 0.302488108 | 0.946481 | 3.95E-05 | hypermethylated |
| cg04044720 | 0.21814 | 0.420326486 | 0.946256 | 1.26E-05 | hypermethylated |
| cg26333652 | 0.30152 | 0.580914054 | 0.946071 | 6.39E-06 | hypermethylated |
| cg11972677 | 0.2263  | 0.435972432 | 0.946    | 4.24E-06 | hypermethylated |
| cg01774704 | 0.19934 | 0.383932432 | 0.945621 | 2.64E-06 | hypermethylated |
| cg19029181 | 0.27784 | 0.535122703 | 0.945615 | 3.21E-06 | hypermethylated |
| cg15710198 | 0.16884 | 0.325183784 | 0.945599 | 0.000155 | hypermethylated |
| cg01898698 | 0.25607 | 0.493172432 | 0.945554 | 4.48E-06 | hypermethylated |
| cg27552679 | 0.25029 | 0.48197027  | 0.945344 | 2.78E-05 | hypermethylated |
| cg22614891 | 0.13676 | 0.263315135 | 0.945144 | 6.01E-05 | hypermethylated |
| cg00785941 | 0.19996 | 0.38494973  | 0.944959 | 1.94E-05 | hypermethylated |
| cg00502190 | 0.19882 | 0.382738919 | 0.944898 | 2.10E-05 | hypermethylated |
| cg23930711 | 0.17188 | 0.33086973  | 0.944862 | 9.49E-05 | hypermethylated |
| cg22979783 | 0.23496 | 0.452273514 | 0.94478  | 2.07E-05 | hypermethylated |
| cg03889479 | 0.15549 | 0.299300541 | 0.944773 | 5.86E-05 | hypermethylated |
| cg05321361 | 0.21248 | 0.408955135 | 0.944616 | 1.15E-05 | hypermethylated |
| cg23605843 | 0.23406 | 0.450445946 | 0.944476 | 1.06E-05 | hypermethylated |
| cg07609788 | 0.21018 | 0.404481622 | 0.944449 | 1.75E-05 | hypermethylated |

|            |         |             |          |          |                 |
|------------|---------|-------------|----------|----------|-----------------|
| cg09821185 | 0.28296 | 0.544524324 | 0.944398 | 0.000163 | hypermethylated |
| cg05345286 | 0.19564 | 0.376451351 | 0.944262 | 2.89E-05 | hypermethylated |
| cg01296360 | 0.15703 | 0.302034054 | 0.943671 | 1.87E-05 | hypermethylated |
| cg21681109 | 0.17178 | 0.330331351 | 0.943352 | 5.28E-06 | hypermethylated |
| cg14655855 | 0.18363 | 0.353081622 | 0.9432   | 0.001074 | hypermethylated |
| cg01308258 | 0.18556 | 0.356738919 | 0.942983 | 4.82E-05 | hypermethylated |
| cg23517116 | 0.20686 | 0.397545946 | 0.942467 | 2.57E-05 | hypermethylated |
| cg11028201 | 0.23073 | 0.443344324 | 0.942222 | 0.000189 | hypermethylated |
| cg24430580 | 0.15702 | 0.301705946 | 0.942195 | 9.49E-05 | hypermethylated |
| cg02126051 | 0.17693 | 0.339954054 | 0.942161 | 7.03E-05 | hypermethylated |
| cg00181834 | 0.17408 | 0.334477838 | 0.94216  | 2.15E-05 | hypermethylated |
| cg00896347 | 0.17699 | 0.340014595 | 0.941929 | 0.0002   | hypermethylated |
| cg02744113 | 0.17593 | 0.33791027  | 0.941639 | 3.07E-05 | hypermethylated |
| cg22635491 | 0.26558 | 0.510071351 | 0.941553 | 3.32E-05 | hypermethylated |
| cg16491960 | 0.27221 | 0.522782162 | 0.94149  | 2.64E-05 | hypermethylated |
| cg22815110 | 0.16255 | 0.312178378 | 0.941487 | 9.83E-05 | hypermethylated |
| cg06633061 | 0.17355 | 0.333119459 | 0.940688 | 4.58E-05 | hypermethylated |
| cg25616547 | 0.24488 | 0.469963784 | 0.940475 | 8.22E-05 | hypermethylated |
| cg06426416 | 0.24014 | 0.460775676 | 0.940189 | 6.95E-05 | hypermethylated |
| cg25829425 | 0.16081 | 0.308418378 | 0.939532 | 1.31E-05 | hypermethylated |
| cg07152755 | 0.19899 | 0.381625946 | 0.939463 | 4.42E-05 | hypermethylated |
| cg12451099 | 0.20289 | 0.388968108 | 0.938954 | 7.12E-06 | hypermethylated |
| cg27175093 | 0.22056 | 0.422716757 | 0.93852  | 6.31E-05 | hypermethylated |
| cg14283783 | 0.19165 | 0.367301622 | 0.938491 | 0.000168 | hypermethylated |
| cg04972566 | 0.17557 | 0.336465946 | 0.938414 | 5.06E-05 | hypermethylated |
| cg01581018 | 0.18349 | 0.351621622 | 0.938322 | 6.95E-05 | hypermethylated |
| cg23369632 | 0.28571 | 0.547383243 | 0.938    | 0.000174 | hypermethylated |
| cg26216629 | 0.16501 | 0.316125946 | 0.937946 | 7.72E-06 | hypermethylated |
| cg18032969 | 0.19893 | 0.381026486 | 0.93763  | 6.22E-06 | hypermethylated |
| cg20807545 | 0.16907 | 0.323824865 | 0.937593 | 0.000464 | hypermethylated |
| cg27567430 | 0.2002  | 0.383441622 | 0.937565 | 9.27E-05 | hypermethylated |
| cg26525091 | 0.16914 | 0.323932973 | 0.937477 | 0.000143 | hypermethylated |
| cg13899718 | 0.23281 | 0.445765946 | 0.937133 | 0.0003   | hypermethylated |
| cg16219603 | 0.1704  | 0.326267568 | 0.93713  | 2.24E-05 | hypermethylated |
| cg18395499 | 0.21692 | 0.41532973  | 0.937094 | 3.76E-05 | hypermethylated |
| cg11123720 | 0.23107 | 0.442205946 | 0.936388 | 0.00012  | hypermethylated |
| cg10417567 | 0.16211 | 0.310230811 | 0.936369 | 0.000306 | hypermethylated |
| cg01236132 | 0.22317 | 0.427078378 | 0.936358 | 9.44E-06 | hypermethylated |
| cg12615535 | 0.2282  | 0.436701622 | 0.936349 | 0.00013  | hypermethylated |
| cg20291049 | 0.23955 | 0.458409189 | 0.936309 | 1.04E-05 | hypermethylated |
| cg21852117 | 0.22793 | 0.436130811 | 0.93617  | 2.79E-06 | hypermethylated |
| cg14627089 | 0.19291 | 0.369056757 | 0.935915 | 0.000148 | hypermethylated |
| cg20219381 | 0.18525 | 0.354371892 | 0.935791 | 5.86E-05 | hypermethylated |
| cg18843682 | 0.16657 | 0.318564324 | 0.935456 | 7.56E-05 | hypermethylated |
| cg23563234 | 0.17682 | 0.338142703 | 0.935351 | 7.47E-05 | hypermethylated |
| cg02964724 | 0.17191 | 0.328705946 | 0.935144 | 7.47E-05 | hypermethylated |
| cg07105285 | 0.21277 | 0.406833514 | 0.935144 | 3.90E-06 | hypermethylated |
| cg01629716 | 0.2026  | 0.387385946 | 0.935137 | 0.000157 | hypermethylated |
| cg07211875 | 0.14459 | 0.276456757 | 0.935086 | 1.35E-05 | hypermethylated |
| cg06763054 | 0.20905 | 0.399597297 | 0.934699 | 5.86E-05 | hypermethylated |
| cg04686763 | 0.12184 | 0.232877838 | 0.934586 | 0.000287 | hypermethylated |
| cg02700626 | 0.17274 | 0.33013027  | 0.934433 | 4.58E-05 | hypermethylated |
| cg06908778 | 0.18593 | 0.355316757 | 0.934346 | 4.53E-05 | hypermethylated |
| cg17974166 | 0.23241 | 0.444121081 | 0.934281 | 9.27E-05 | hypermethylated |
| cg06202276 | 0.22804 | 0.435748108 | 0.934207 | 0.000112 | hypermethylated |
| cg23999932 | 0.1779  | 0.339898919 | 0.934039 | 9.60E-05 | hypermethylated |
| cg22505086 | 0.18201 | 0.347659459 | 0.933657 | 8.03E-05 | hypermethylated |
| cg21610164 | 0.14322 | 0.273558919 | 0.933619 | 0.000287 | hypermethylated |



|            |         |             |          |          |                 |
|------------|---------|-------------|----------|----------|-----------------|
| cg17408527 | 0.23267 | 0.444403784 | 0.933586 | 6.05E-06 | hypermethylated |
| cg14547067 | 0.18244 | 0.348441622 | 0.933495 | 0.001912 | hypermethylated |
| cg17626960 | 0.22199 | 0.423907027 | 0.933253 | 0.000148 | hypermethylated |
| cg06602847 | 0.17586 | 0.335767568 | 0.933036 | 4.82E-05 | hypermethylated |
| cg07323825 | 0.18763 | 0.358238378 | 0.933029 | 0.000306 | hypermethylated |
| cg02472801 | 0.19478 | 0.371883784 | 0.933006 | 0.000575 | hypermethylated |
| cg10687131 | 0.201   | 0.383650811 | 0.932598 | 0.000528 | hypermethylated |
| cg04369341 | 0.18558 | 0.35418973  | 0.932481 | 0.000178 | hypermethylated |
| cg26068283 | 0.17266 | 0.329525405 | 0.932456 | 0.000111 | hypermethylated |
| cg04938315 | 0.21269 | 0.405864324 | 0.932245 | 1.01E-05 | hypermethylated |
| cg12503267 | 0.13666 | 0.260743243 | 0.932039 | 0.000495 | hypermethylated |
| cg14772925 | 0.22387 | 0.427087027 | 0.931869 | 7.72E-06 | hypermethylated |
| cg13011388 | 0.20795 | 0.396706486 | 0.931835 | 0.00032  | hypermethylated |
| cg06896987 | 0.23464 | 0.447564865 | 0.931648 | 2.27E-05 | hypermethylated |
| cg19456622 | 0.17801 | 0.339537297 | 0.931612 | 0.000219 | hypermethylated |
| cg18002116 | 0.25706 | 0.490274054 | 0.931483 | 2.45E-05 | hypermethylated |
| cg00613752 | 0.18494 | 0.352702162 | 0.931393 | 1.46E-05 | hypermethylated |
| cg14631165 | 0.14856 | 0.283254054 | 0.931051 | 1.58E-05 | hypermethylated |
| cg27322846 | 0.18602 | 0.354652432 | 0.930948 | 2.36E-06 | hypermethylated |
| cg03532026 | 0.27219 | 0.518885946 | 0.930803 | 5.89E-06 | hypermethylated |
| cg11920122 | 0.17215 | 0.328161081 | 0.930738 | 1.99E-05 | hypermethylated |
| cg05168977 | 0.18671 | 0.355905405 | 0.930695 | 1.71E-05 | hypermethylated |
| cg19435284 | 0.17848 | 0.340035676 | 0.929924 | 5.28E-06 | hypermethylated |
| cg01237333 | 0.24584 | 0.468326486 | 0.929795 | 5.73E-06 | hypermethylated |
| cg14857764 | 0.238   | 0.453191351 | 0.929159 | 0.000138 | hypermethylated |
| cg11612345 | 0.18174 | 0.346056216 | 0.92913  | 0.000426 | hypermethylated |
| cg13434352 | 0.12966 | 0.246835135 | 0.928814 | 3.57E-05 | hypermethylated |
| cg08003628 | 0.24947 | 0.474816216 | 0.928503 | 0.000234 | hypermethylated |
| cg15996459 | 0.21114 | 0.401795676 | 0.928262 | 0.000408 | hypermethylated |
| cg18175808 | 0.17922 | 0.340975676 | 0.927937 | 8.26E-06 | hypermethylated |
| cg00425918 | 0.16791 | 0.319404324 | 0.927696 | 4.47E-05 | hypermethylated |
| cg24466241 | 0.22759 | 0.432915676 | 0.927649 | 4.24E-06 | hypermethylated |
| cg06784991 | 0.21965 | 0.41778     | 0.927537 | 8.37E-06 | hypermethylated |
| cg24541426 | 0.21574 | 0.410308649 | 0.927416 | 2.18E-05 | hypermethylated |
| cg16208657 | 0.17699 | 0.336608108 | 0.927402 | 2.39E-05 | hypermethylated |
| cg13209441 | 0.20055 | 0.381400541 | 0.927345 | 8.03E-05 | hypermethylated |
| cg00769810 | 0.12386 | 0.235553514 | 0.927345 | 1.42E-05 | hypermethylated |
| cg00229754 | 0.23278 | 0.44268     | 0.927297 | 2.21E-05 | hypermethylated |
| cg12457773 | 0.18785 | 0.357215676 | 0.927214 | 8.63E-05 | hypermethylated |
| cg22324567 | 0.26609 | 0.505992432 | 0.927202 | 7.03E-05 | hypermethylated |
| cg20963227 | 0.20022 | 0.380727027 | 0.927171 | 1.84E-05 | hypermethylated |
| cg06785213 | 0.14609 | 0.277787027 | 0.927122 | 0.00013  | hypermethylated |
| cg14056644 | 0.1819  | 0.345834595 | 0.926937 | 8.37E-06 | hypermethylated |
| cg26398921 | 0.23402 | 0.444836757 | 0.926644 | 2.04E-05 | hypermethylated |
| cg03284310 | 0.13344 | 0.253613514 | 0.92644  | 1.71E-05 | hypermethylated |
| cg11848563 | 0.15183 | 0.288518919 | 0.926209 | 1.21E-05 | hypermethylated |
| cg06049868 | 0.23983 | 0.455678378 | 0.926004 | 9.07E-06 | hypermethylated |
| cg24951286 | 0.21571 | 0.409793514 | 0.925804 | 3.32E-05 | hypermethylated |
| cg20996682 | 0.18227 | 0.346188649 | 0.925481 | 0.000112 | hypermethylated |
| cg08288811 | 0.21165 | 0.401979459 | 0.925441 | 4.12E-06 | hypermethylated |
| cg00873601 | 0.29107 | 0.552818378 | 0.925439 | 6.31E-05 | hypermethylated |
| cg18149485 | 0.17841 | 0.338814054 | 0.925297 | 4.05E-05 | hypermethylated |
| cg05940231 | 0.1974  | 0.374796216 | 0.924984 | 0.000335 | hypermethylated |
| cg16818395 | 0.22747 | 0.431831892 | 0.924794 | 6.93E-06 | hypermethylated |
| cg19338524 | 0.17022 | 0.323124324 | 0.924689 | 5.73E-06 | hypermethylated |
| cg17686487 | 0.25007 | 0.474603243 | 0.92439  | 0.000108 | hypermethylated |
| cg06656994 | 0.1511  | 0.286742162 | 0.92425  | 6.95E-05 | hypermethylated |
| cg10737118 | 0.15053 | 0.285654595 | 0.924221 | 4.82E-05 | hypermethylated |

|            |         |             |          |          |                 |
|------------|---------|-------------|----------|----------|-----------------|
| cg17198308 | 0.22458 | 0.426138919 | 0.924094 | 0.000214 | hypermethylated |
| cg13864319 | 0.16682 | 0.316396216 | 0.92344  | 2.04E-05 | hypermethylated |
| cg26149682 | 0.23166 | 0.439344865 | 0.923345 | 8.60E-06 | hypermethylated |
| cg26458072 | 0.17189 | 0.325975676 | 0.923279 | 0.001063 | hypermethylated |
| cg21836370 | 0.24118 | 0.457332973 | 0.923135 | 3.40E-05 | hypermethylated |
| cg06911084 | 0.1844  | 0.349641081 | 0.923036 | 0.000117 | hypermethylated |
| cg03469618 | 0.18961 | 0.359346486 | 0.922341 | 0.00024  | hypermethylated |
| cg09775263 | 0.21152 | 0.400865405 | 0.922324 | 4.15E-05 | hypermethylated |
| cg12215739 | 0.28018 | 0.530907027 | 0.922105 | 1.71E-05 | hypermethylated |
| cg06368184 | 0.17906 | 0.339296216 | 0.922102 | 1.20E-05 | hypermethylated |
| cg11184748 | 0.22448 | 0.425320541 | 0.921964 | 1.06E-05 | hypermethylated |
| cg14633398 | 0.17363 | 0.328956757 | 0.921882 | 0.00039  | hypermethylated |
| cg14312649 | 0.18555 | 0.351501081 | 0.921721 | 6.95E-05 | hypermethylated |
| cg04623265 | 0.1391  | 0.263460541 | 0.921464 | 6.78E-05 | hypermethylated |
| cg25999578 | 0.20494 | 0.388135135 | 0.921357 | 6.54E-05 | hypermethylated |
| cg21147648 | 0.1826  | 0.345753514 | 0.921057 | 1.18E-05 | hypermethylated |
| cg14614211 | 0.2142  | 0.405561622 | 0.920963 | 1.31E-05 | hypermethylated |
| cg15961744 | 0.25979 | 0.491757838 | 0.920602 | 9.07E-06 | hypermethylated |
| cg15557878 | 0.21576 | 0.408351892 | 0.920385 | 4.12E-06 | hypermethylated |
| cg20025656 | 0.19967 | 0.377858378 | 0.920228 | 4.48E-06 | hypermethylated |
| cg01891252 | 0.17529 | 0.331680541 | 0.920051 | 2.85E-05 | hypermethylated |
| cg11970349 | 0.18804 | 0.355803784 | 0.920042 | 8.03E-05 | hypermethylated |
| cg07462756 | 0.23602 | 0.446559459 | 0.919943 | 5.51E-05 | hypermethylated |
| cg06488443 | 0.19517 | 0.369254054 | 0.919882 | 7.12E-06 | hypermethylated |
| cg15869649 | 0.20442 | 0.386705946 | 0.919701 | 3.00E-05 | hypermethylated |
| cg06991392 | 0.25439 | 0.481081622 | 0.91924  | 0.000358 | hypermethylated |
| cg14742937 | 0.20885 | 0.394941622 | 0.919172 | 0.0017   | hypermethylated |
| cg17943279 | 0.21427 | 0.405164865 | 0.919079 | 3.12E-06 | hypermethylated |
| cg06873880 | 0.1747  | 0.330323784 | 0.919001 | 9.96E-06 | hypermethylated |
| cg07929264 | 0.22998 | 0.43484     | 0.918976 | 2.36E-06 | hypermethylated |
| cg17080423 | 0.16294 | 0.308078919 | 0.918959 | 5.35E-06 | hypermethylated |
| cg06865612 | 0.17592 | 0.332606486 | 0.918897 | 5.73E-06 | hypermethylated |
| cg16209664 | 0.19509 | 0.368808108 | 0.918731 | 1.05E-05 | hypermethylated |
| cg07341624 | 0.24347 | 0.460264324 | 0.918719 | 6.05E-06 | hypermethylated |
| cg10606834 | 0.20873 | 0.394523784 | 0.918474 | 3.40E-05 | hypermethylated |
| cg05854217 | 0.19537 | 0.369249189 | 0.918386 | 1.99E-05 | hypermethylated |
| cg04765277 | 0.19747 | 0.373192973 | 0.918288 | 1.62E-05 | hypermethylated |
| cg04917446 | 0.20349 | 0.384566486 | 0.918275 | 0.001314 | hypermethylated |
| cg16916914 | 0.24803 | 0.468717838 | 0.918205 | 0.000152 | hypermethylated |
| cg02254574 | 0.21    | 0.396783243 | 0.917962 | 0.000187 | hypermethylated |
| cg03858673 | 0.24271 | 0.458533514 | 0.917794 | 6.57E-06 | hypermethylated |
| cg05801246 | 0.24001 | 0.453151892 | 0.9169   | 1.92E-05 | hypermethylated |
| cg18755846 | 0.18588 | 0.350922162 | 0.91678  | 8.15E-06 | hypermethylated |
| cg17495715 | 0.22268 | 0.420338919 | 0.916581 | 5.28E-06 | hypermethylated |
| cg12821804 | 0.27778 | 0.524313514 | 0.916487 | 7.72E-06 | hypermethylated |
| cg04697262 | 0.21139 | 0.39897027  | 0.916374 | 0.000168 | hypermethylated |
| cg14051264 | 0.20493 | 0.386718378 | 0.916152 | 7.72E-06 | hypermethylated |
| cg01609275 | 0.20167 | 0.380549189 | 0.916086 | 0.000495 | hypermethylated |
| cg06917617 | 0.21904 | 0.413261622 | 0.915861 | 0.000474 | hypermethylated |
| cg20982412 | 0.19221 | 0.362617297 | 0.915764 | 1.84E-05 | hypermethylated |
| cg23963802 | 0.19378 | 0.365541622 | 0.915616 | 7.65E-05 | hypermethylated |
| cg06635722 | 0.1811  | 0.341592973 | 0.915492 | 8.42E-05 | hypermethylated |
| cg01650137 | 0.23527 | 0.443736757 | 0.915387 | 0.000354 | hypermethylated |
| cg24442454 | 0.18192 | 0.343070811 | 0.915202 | 0.000108 | hypermethylated |
| cg07333191 | 0.29374 | 0.553837297 | 0.914922 | 2.15E-05 | hypermethylated |
| cg13239348 | 0.20822 | 0.392525946 | 0.914679 | 0.000148 | hypermethylated |
| cg10192198 | 0.20782 | 0.391754595 | 0.914616 | 1.50E-05 | hypermethylated |
| cg06462796 | 0.21522 | 0.405696216 | 0.914588 | 6.22E-06 | hypermethylated |

|            |         |             |          |          |                 |
|------------|---------|-------------|----------|----------|-----------------|
| cg17740322 | 0.18187 | 0.34282973  | 0.914585 | 0.000575 | hypermethylated |
| cg01120173 | 0.25171 | 0.474375135 | 0.914266 | 0.000214 | hypermethylated |
| cg26938561 | 0.23947 | 0.451182703 | 0.913867 | 3.23E-05 | hypermethylated |
| cg00592870 | 0.10654 | 0.200692973 | 0.913595 | 7.47E-05 | hypermethylated |
| cg26186239 | 0.22931 | 0.431936757 | 0.913521 | 1.63E-06 | hypermethylated |
| cg24394631 | 0.22531 | 0.424343784 | 0.913322 | 1.46E-05 | hypermethylated |
| cg05928053 | 0.23819 | 0.448523784 | 0.913072 | 0.000107 | hypermethylated |
| cg02683197 | 0.21725 | 0.409062162 | 0.912964 | 0.000195 | hypermethylated |
| cg08681855 | 0.16497 | 0.310617838 | 0.912937 | 8.84E-05 | hypermethylated |
| cg10171357 | 0.2728  | 0.513575676 | 0.912733 | 9.05E-05 | hypermethylated |
| cg15222651 | 0.13574 | 0.255537838 | 0.912691 | 6.62E-05 | hypermethylated |
| cg10425861 | 0.20961 | 0.394580541 | 0.912612 | 7.12E-05 | hypermethylated |
| cg10803098 | 0.17464 | 0.32874973  | 0.912606 | 0.000575 | hypermethylated |
| cg25734913 | 0.17485 | 0.32913027  | 0.912541 | 3.08E-06 | hypermethylated |
| cg18461458 | 0.14311 | 0.26927027  | 0.91193  | 0.000106 | hypermethylated |
| cg21840976 | 0.18012 | 0.338695135 | 0.911029 | 0.000256 | hypermethylated |
| cg03656099 | 0.22983 | 0.432149189 | 0.910962 | 4.26E-05 | hypermethylated |
| cg26495109 | 0.18424 | 0.346285405 | 0.910375 | 0.000191 | hypermethylated |
| cg20979061 | 0.25727 | 0.483540541 | 0.910354 | 1.71E-05 | hypermethylated |
| cg01597891 | 0.15461 | 0.290570811 | 0.910256 | 6.15E-05 | hypermethylated |
| cg24658517 | 0.29163 | 0.547891892 | 0.909752 | 8.83E-06 | hypermethylated |
| cg10608596 | 0.26465 | 0.497073514 | 0.909374 | 2.45E-05 | hypermethylated |
| cg24525176 | 0.18324 | 0.344156757 | 0.909331 | 1.33E-06 | hypermethylated |
| cg15506609 | 0.32441 | 0.609204324 | 0.909108 | 4.73E-06 | hypermethylated |
| cg10515131 | 0.18534 | 0.34802973  | 0.909036 | 0.000287 | hypermethylated |
| cg08362273 | 0.21989 | 0.412900541 | 0.909012 | 4.30E-06 | hypermethylated |
| cg02783918 | 0.26431 | 0.496301622 | 0.908986 | 1.71E-05 | hypermethylated |
| cg16142855 | 0.24562 | 0.461188649 | 0.908929 | 8.15E-06 | hypermethylated |
| cg17481117 | 0.2475  | 0.46444973  | 0.908094 | 5.73E-06 | hypermethylated |
| cg00058879 | 0.20066 | 0.376471892 | 0.907789 | 2.45E-05 | hypermethylated |
| cg02710296 | 0.31905 | 0.598580541 | 0.907763 | 4.36E-05 | hypermethylated |
| cg01528028 | 0.1637  | 0.307004324 | 0.907205 | 5.86E-05 | hypermethylated |
| cg08489674 | 0.20956 | 0.392974054 | 0.907071 | 0.000152 | hypermethylated |
| cg04865691 | 0.20295 | 0.380571892 | 0.907045 | 5.00E-06 | hypermethylated |
| cg01530101 | 0.28786 | 0.539758919 | 0.906948 | 3.59E-06 | hypermethylated |
| cg21123160 | 0.24468 | 0.458763784 | 0.906855 | 7.47E-05 | hypermethylated |
| cg16555417 | 0.19038 | 0.35695027  | 0.906841 | 0.00035  | hypermethylated |
| cg16019434 | 0.27137 | 0.5088      | 0.906837 | 2.71E-05 | hypermethylated |
| cg21784383 | 0.21788 | 0.408402162 | 0.906457 | 0.000287 | hypermethylated |
| cg05735384 | 0.24583 | 0.46078     | 0.906417 | 1.94E-05 | hypermethylated |
| cg07918726 | 0.1948  | 0.365098378 | 0.906292 | 6.01E-05 | hypermethylated |
| cg03724423 | 0.19582 | 0.367007027 | 0.90628  | 6.62E-05 | hypermethylated |
| cg10675276 | 0.18885 | 0.353938378 | 0.906257 | 0.000296 | hypermethylated |
| cg02318784 | 0.23619 | 0.442587027 | 0.906013 | 3.76E-05 | hypermethylated |
| cg07115626 | 0.20551 | 0.385035676 | 0.905784 | 2.10E-05 | hypermethylated |
| cg24066601 | 0.21814 | 0.408665405 | 0.905666 | 0.0003   | hypermethylated |
| cg17744293 | 0.20314 | 0.380514054 | 0.905475 | 8.60E-06 | hypermethylated |
| cg07639287 | 0.22886 | 0.428632432 | 0.905276 | 8.15E-06 | hypermethylated |
| cg14636534 | 0.25855 | 0.48414973  | 0.90501  | 1.01E-05 | hypermethylated |
| cg01382414 | 0.15653 | 0.293037297 | 0.904645 | 0.000191 | hypermethylated |
| cg13578408 | 0.17106 | 0.320117838 | 0.904101 | 1.31E-05 | hypermethylated |
| cg18049638 | 0.21386 | 0.400141622 | 0.903844 | 4.20E-05 | hypermethylated |
| cg26843711 | 0.21542 | 0.403048649 | 0.903802 | 2.04E-05 | hypermethylated |
| cg27649239 | 0.28898 | 0.540648649 | 0.903722 | 8.42E-05 | hypermethylated |
| cg15134033 | 0.19892 | 0.372116216 | 0.903565 | 9.07E-06 | hypermethylated |
| cg22479299 | 0.13895 | 0.259930811 | 0.903562 | 5.79E-05 | hypermethylated |
| cg19767622 | 0.2123  | 0.397138378 | 0.903537 | 6.70E-05 | hypermethylated |
| cg19352038 | 0.26291 | 0.491806486 | 0.903522 | 1.12E-05 | hypermethylated |

|            |         |             |          |          |                 |
|------------|---------|-------------|----------|----------|-----------------|
| cg14354327 | 0.22767 | 0.425705946 | 0.902913 | 6.75E-06 | hypermethylated |
| cg23768829 | 0.23698 | 0.44310973  | 0.902899 | 1.46E-05 | hypermethylated |
| cg22309923 | 0.13058 | 0.244151351 | 0.902842 | 5.43E-06 | hypermethylated |
| cg18826572 | 0.21595 | 0.403764324 | 0.902816 | 0.000112 | hypermethylated |
| cg15233892 | 0.15621 | 0.292027568 | 0.902618 | 2.54E-05 | hypermethylated |
| cg11128216 | 0.24161 | 0.45157027  | 0.90227  | 0.000613 | hypermethylated |
| cg09061632 | 0.16302 | 0.304618378 | 0.901954 | 2.27E-05 | hypermethylated |
| cg07273051 | 0.17653 | 0.329842703 | 0.901865 | 8.63E-05 | hypermethylated |
| cg10774586 | 0.12374 | 0.23116973  | 0.901641 | 0.000148 | hypermethylated |
| cg08944170 | 0.24126 | 0.450666486 | 0.901471 | 0.000178 | hypermethylated |
| cg09936561 | 0.23882 | 0.446011892 | 0.901159 | 1.66E-05 | hypermethylated |
| cg06900404 | 0.16576 | 0.309534054 | 0.901002 | 0.000152 | hypermethylated |
| cg27252164 | 0.208   | 0.388332973 | 0.900711 | 2.78E-05 | hypermethylated |
| cg24372299 | 0.16768 | 0.312978378 | 0.900352 | 0.000653 | hypermethylated |
| cg14625581 | 0.12871 | 0.240230811 | 0.900297 | 0.002574 | hypermethylated |
| cg23754320 | 0.19237 | 0.35892973  | 0.899818 | 0.000104 | hypermethylated |
| cg00756032 | 0.18591 | 0.346836757 | 0.899652 | 0.000161 | hypermethylated |
| cg04481096 | 0.26438 | 0.493195676 | 0.899547 | 7.93E-05 | hypermethylated |
| cg16852704 | 0.16275 | 0.303589189 | 0.899463 | 1.44E-05 | hypermethylated |
| cg27105390 | 0.22647 | 0.422396216 | 0.899277 | 2.10E-06 | hypermethylated |
| cg00525823 | 0.19971 | 0.37246     | 0.899179 | 3.23E-05 | hypermethylated |
| cg08692733 | 0.25123 | 0.468497838 | 0.899034 | 3.49E-05 | hypermethylated |
| cg09191626 | 0.21396 | 0.398995135 | 0.89903  | 0.000117 | hypermethylated |
| cg23413924 | 0.19973 | 0.372388108 | 0.898756 | 1.71E-05 | hypermethylated |
| cg02008154 | 0.19337 | 0.360470811 | 0.898518 | 1.89E-05 | hypermethylated |
| cg03206681 | 0.29035 | 0.541251351 | 0.898506 | 6.22E-06 | hypermethylated |
| cg05864140 | 0.22067 | 0.411348108 | 0.898469 | 5.25E-05 | hypermethylated |
| cg14443467 | 0.2184  | 0.40710973  | 0.898445 | 3.40E-05 | hypermethylated |
| cg01302656 | 0.2429  | 0.452766486 | 0.898405 | 8.71E-06 | hypermethylated |
| cg04647982 | 0.19936 | 0.371538919 | 0.898137 | 2.64E-05 | hypermethylated |
| cg16697438 | 0.2519  | 0.469395676 | 0.897953 | 8.42E-05 | hypermethylated |
| cg13202751 | 0.20312 | 0.378456216 | 0.897794 | 3.57E-05 | hypermethylated |
| cg04598774 | 0.16352 | 0.304661081 | 0.897738 | 2.67E-05 | hypermethylated |
| cg02381539 | 0.21464 | 0.399874595 | 0.897629 | 0.000274 | hypermethylated |
| cg16036528 | 0.18026 | 0.335814595 | 0.897586 | 3.00E-05 | hypermethylated |
| cg16458436 | 0.17884 | 0.33306     | 0.897113 | 0.000119 | hypermethylated |
| cg06808467 | 0.132   | 0.24581027  | 0.897007 | 4.47E-05 | hypermethylated |
| cg07483462 | 0.16813 | 0.313060541 | 0.896865 | 1.31E-05 | hypermethylated |
| cg23508813 | 0.174   | 0.323872432 | 0.896338 | 4.47E-05 | hypermethylated |
| cg01524278 | 0.22827 | 0.42482973  | 0.896143 | 1.75E-05 | hypermethylated |
| cg04937144 | 0.20665 | 0.384558378 | 0.896013 | 4.58E-05 | hypermethylated |
| cg12936121 | 0.21569 | 0.40134     | 0.895866 | 7.84E-05 | hypermethylated |
| cg22280475 | 0.20775 | 0.386528649 | 0.895727 | 0.000283 | hypermethylated |
| cg11655243 | 0.28903 | 0.537702703 | 0.895589 | 0.000102 | hypermethylated |
| cg22843446 | 0.14036 | 0.261110811 | 0.89553  | 2.78E-05 | hypermethylated |
| cg26821745 | 0.18043 | 0.33561027  | 0.895348 | 4.15E-05 | hypermethylated |
| cg25396728 | 0.21698 | 0.403574054 | 0.895271 | 0.000152 | hypermethylated |
| cg11229513 | 0.22666 | 0.421496216 | 0.89499  | 0.000306 | hypermethylated |
| cg00273068 | 0.14894 | 0.276891351 | 0.894589 | 0.000117 | hypermethylated |
| cg19856705 | 0.24666 | 0.458528108 | 0.894486 | 0.000551 | hypermethylated |
| cg03320827 | 0.17035 | 0.316629189 | 0.894292 | 9.49E-05 | hypermethylated |
| cg00551679 | 0.26334 | 0.489257838 | 0.893668 | 0.000122 | hypermethylated |
| cg17805540 | 0.24207 | 0.449707027 | 0.893561 | 4.10E-05 | hypermethylated |
| cg24184636 | 0.20501 | 0.380772973 | 0.893237 | 0.000126 | hypermethylated |
| cg21570988 | 0.25415 | 0.472032973 | 0.893207 | 1.99E-05 | hypermethylated |
| cg21109744 | 0.1947  | 0.361511892 | 0.89279  | 0.000234 | hypermethylated |
| cg07930539 | 0.26913 | 0.499702703 | 0.892767 | 2.15E-05 | hypermethylated |
| cg04050315 | 0.14393 | 0.267239459 | 0.892766 | 0.000132 | hypermethylated |

|            |         |             |          |          |                 |
|------------|---------|-------------|----------|----------|-----------------|
| cg04792712 | 0.2246  | 0.416987027 | 0.892645 | 6.15E-05 | hypermethylated |
| cg23207077 | 0.20842 | 0.386912973 | 0.892515 | 1.33E-05 | hypermethylated |
| cg18546622 | 0.21766 | 0.404051892 | 0.892464 | 4.36E-05 | hypermethylated |
| cg08832227 | 0.26018 | 0.482794595 | 0.891899 | 7.93E-06 | hypermethylated |
| cg09803262 | 0.25228 | 0.467925405 | 0.891253 | 4.94E-05 | hypermethylated |
| cg27317647 | 0.25489 | 0.472616216 | 0.890794 | 2.32E-05 | hypermethylated |
| cg19115492 | 0.16827 | 0.311931351 | 0.890451 | 0.000102 | hypermethylated |
| cg18054172 | 0.19714 | 0.365424865 | 0.890354 | 0.000209 | hypermethylated |
| cg00547425 | 0.16708 | 0.309667568 | 0.890181 | 6.15E-05 | hypermethylated |
| cg05262829 | 0.31067 | 0.575797838 | 0.890179 | 3.85E-05 | hypermethylated |
| cg22622477 | 0.24435 | 0.452851892 | 0.89009  | 0.00024  | hypermethylated |
| cg04991036 | 0.19057 | 0.353155135 | 0.889981 | 1.09E-05 | hypermethylated |
| cg12097883 | 0.20706 | 0.383705946 | 0.889952 | 0.00064  | hypermethylated |
| cg21081803 | 0.27635 | 0.511981081 | 0.889594 | 5.14E-06 | hypermethylated |
| cg03553587 | 0.21061 | 0.390150811 | 0.889458 | 2.39E-05 | hypermethylated |
| cg19568544 | 0.24111 | 0.446517838 | 0.889026 | 5.32E-05 | hypermethylated |
| cg05222924 | 0.17769 | 0.329031892 | 0.888865 | 0.000495 | hypermethylated |
| cg01649773 | 0.19586 | 0.362644324 | 0.888732 | 0.000174 | hypermethylated |
| cg27350402 | 0.23478 | 0.434565946 | 0.888266 | 9.69E-06 | hypermethylated |
| cg22175873 | 0.25846 | 0.478336216 | 0.888084 | 5.28E-06 | hypermethylated |
| cg01187920 | 0.23812 | 0.440594054 | 0.887761 | 1.52E-05 | hypermethylated |
| cg26144458 | 0.22809 | 0.421945405 | 0.887453 | 8.15E-06 | hypermethylated |
| cg18345386 | 0.17661 | 0.326704865 | 0.887421 | 4.15E-05 | hypermethylated |
| cg11199639 | 0.26128 | 0.483304324 | 0.887335 | 0.000822 | hypermethylated |
| cg02927346 | 0.19237 | 0.355827568 | 0.887294 | 0.001619 | hypermethylated |
| cg24576050 | 0.20407 | 0.377421622 | 0.887113 | 7.32E-06 | hypermethylated |
| cg01071966 | 0.20382 | 0.376942703 | 0.88705  | 2.36E-06 | hypermethylated |
| cg13711394 | 0.23758 | 0.439289189 | 0.886758 | 7.21E-05 | hypermethylated |
| cg04031757 | 0.16204 | 0.299542162 | 0.886409 | 8.83E-06 | hypermethylated |
| cg20047489 | 0.23943 | 0.442517297 | 0.88613  | 0.000109 | hypermethylated |
| cg06313716 | 0.15116 | 0.279346486 | 0.885979 | 0.000224 | hypermethylated |
| cg11220565 | 0.20648 | 0.381547568 | 0.885861 | 0.000212 | hypermethylated |
| cg27604145 | 0.23094 | 0.42667027  | 0.885604 | 0.000296 | hypermethylated |
| cg08638320 | 0.23563 | 0.435296216 | 0.885474 | 0.002409 | hypermethylated |
| cg07137606 | 0.2928  | 0.540816757 | 0.885224 | 5.25E-05 | hypermethylated |
| cg07040303 | 0.18418 | 0.34016     | 0.885097 | 2.27E-05 | hypermethylated |
| cg22796509 | 0.1725  | 0.318551351 | 0.88493  | 1.35E-05 | hypermethylated |
| cg13072625 | 0.19749 | 0.364458919 | 0.883977 | 4.47E-05 | hypermethylated |
| cg10094078 | 0.17876 | 0.329825405 | 0.883679 | 2.85E-05 | hypermethylated |
| cg23154059 | 0.21661 | 0.399619459 | 0.883527 | 0.000214 | hypermethylated |
| cg19713947 | 0.23521 | 0.433921081 | 0.883483 | 0.00054  | hypermethylated |
| cg05222995 | 0.22235 | 0.410112973 | 0.883189 | 0.000191 | hypermethylated |
| cg16589830 | 0.25477 | 0.469895135 | 0.883143 | 0.00054  | hypermethylated |
| cg14171414 | 0.19355 | 0.356895676 | 0.882796 | 1.31E-05 | hypermethylated |
| cg16181396 | 0.25408 | 0.468485405 | 0.882721 | 1.54E-05 | hypermethylated |
| cg15513743 | 0.20559 | 0.378965946 | 0.882298 | 2.13E-05 | hypermethylated |
| cg04851169 | 0.18572 | 0.342318919 | 0.882212 | 1.42E-05 | hypermethylated |
| cg23063647 | 0.27747 | 0.511391892 | 0.882097 | 0.00048  | hypermethylated |
| cg01729977 | 0.2043  | 0.376445946 | 0.881754 | 6.62E-05 | hypermethylated |
| cg07730329 | 0.30107 | 0.554671351 | 0.881534 | 1.04E-05 | hypermethylated |
| cg06893273 | 0.2802  | 0.516201081 | 0.881476 | 0.000209 | hypermethylated |
| cg26489513 | 0.22745 | 0.419001622 | 0.881406 | 4.47E-05 | hypermethylated |
| cg00362285 | 0.25727 | 0.473904324 | 0.881313 | 0.000132 | hypermethylated |
| cg04521004 | 0.22949 | 0.422721081 | 0.881275 | 3.36E-05 | hypermethylated |
| cg26870126 | 0.16925 | 0.311736757 | 0.881172 | 1.54E-05 | hypermethylated |
| cg19134568 | 0.23105 | 0.425544865 | 0.881106 | 4.36E-06 | hypermethylated |
| cg11586570 | 0.26828 | 0.494075135 | 0.880991 | 8.84E-05 | hypermethylated |
| cg21296230 | 0.20947 | 0.385630811 | 0.880477 | 0.000155 | hypermethylated |

|            |         |             |          |          |                 |
|------------|---------|-------------|----------|----------|-----------------|
| cg02762440 | 0.17004 | 0.313004324 | 0.880308 | 0.000102 | hypermethylated |
| cg26996818 | 0.23699 | 0.436162703 | 0.88004  | 1.18E-05 | hypermethylated |
| cg07035659 | 0.20745 | 0.381725405 | 0.879772 | 3.76E-05 | hypermethylated |
| cg16185834 | 0.20135 | 0.370494595 | 0.879747 | 3.23E-05 | hypermethylated |
| cg01757312 | 0.24306 | 0.447237838 | 0.87973  | 6.22E-06 | hypermethylated |
| cg26886462 | 0.2426  | 0.446368649 | 0.879656 | 6.05E-06 | hypermethylated |
| cg01805732 | 0.16151 | 0.297164324 | 0.879637 | 0.000102 | hypermethylated |
| cg23089840 | 0.24296 | 0.446975676 | 0.879478 | 0.000142 | hypermethylated |
| cg17444738 | 0.19695 | 0.362282162 | 0.879284 | 9.82E-06 | hypermethylated |
| cg17389519 | 0.19754 | 0.363363784 | 0.87927  | 3.57E-05 | hypermethylated |
| cg15936066 | 0.20072 | 0.369161622 | 0.879068 | 0.003195 | hypermethylated |
| cg05573844 | 0.29754 | 0.547121081 | 0.878777 | 0.000102 | hypermethylated |
| cg16717122 | 0.17634 | 0.324253514 | 0.878762 | 6.78E-05 | hypermethylated |
| cg03945800 | 0.17436 | 0.320575676 | 0.878596 | 0.00071  | hypermethylated |
| cg07115767 | 0.23853 | 0.43844     | 0.878209 | 1.18E-05 | hypermethylated |
| cg02498722 | 0.10939 | 0.201011351 | 0.877796 | 2.35E-05 | hypermethylated |
| cg20470857 | 0.22194 | 0.407782162 | 0.877629 | 1.82E-05 | hypermethylated |
| cg06365535 | 0.25736 | 0.472849189 | 0.877592 | 3.95E-05 | hypermethylated |
| cg15916004 | 0.20059 | 0.368524324 | 0.87751  | 0.00012  | hypermethylated |
| cg13062913 | 0.17513 | 0.321708649 | 0.877328 | 0.000135 | hypermethylated |
| cg09520393 | 0.19885 | 0.365277838 | 0.877314 | 3.32E-05 | hypermethylated |
| cg25428553 | 0.23012 | 0.422718378 | 0.87731  | 0.000313 | hypermethylated |
| cg12230728 | 0.17229 | 0.31647027  | 0.877231 | 0.001041 | hypermethylated |
| cg25152348 | 0.18871 | 0.346616216 | 0.877168 | 0.000245 | hypermethylated |
| cg06291867 | 0.19115 | 0.351051892 | 0.876979 | 9.27E-05 | hypermethylated |
| cg18533201 | 0.24346 | 0.447016757 | 0.876644 | 7.52E-06 | hypermethylated |
| cg08891110 | 0.21894 | 0.401876757 | 0.876218 | 2.45E-05 | hypermethylated |
| cg02267483 | 0.23671 | 0.434423243 | 0.875981 | 2.38E-05 | hypermethylated |
| cg09173768 | 0.27388 | 0.502527568 | 0.875659 | 0.000107 | hypermethylated |
| cg24366557 | 0.21819 | 0.400208108 | 0.875165 | 1.25E-05 | hypermethylated |
| cg11236429 | 0.15994 | 0.29330973  | 0.874894 | 0.000251 | hypermethylated |
| cg22584618 | 0.20557 | 0.376922162 | 0.874637 | 9.05E-05 | hypermethylated |
| cg07862488 | 0.20189 | 0.37014973  | 0.87454  | 1.75E-05 | hypermethylated |
| cg07986943 | 0.16518 | 0.302817297 | 0.874409 | 2.92E-05 | hypermethylated |
| cg17645823 | 0.19807 | 0.36302973  | 0.874077 | 9.96E-06 | hypermethylated |
| cg02461363 | 0.20106 | 0.368480541 | 0.873962 | 0.000135 | hypermethylated |
| cg07502829 | 0.24838 | 0.454837297 | 0.872802 | 1.15E-05 | hypermethylated |
| cg02778237 | 0.26566 | 0.486326486 | 0.872344 | 1.15E-05 | hypermethylated |
| cg14827778 | 0.18926 | 0.346418919 | 0.872148 | 1.39E-05 | hypermethylated |
| cg20284629 | 0.15293 | 0.279903243 | 0.872057 | 1.21E-05 | hypermethylated |
| cg10344832 | 0.21    | 0.384239459 | 0.871616 | 1.18E-05 | hypermethylated |
| cg23725321 | 0.22107 | 0.404478378 | 0.871559 | 0.000726 | hypermethylated |
| cg16049690 | 0.23346 | 0.427103243 | 0.871409 | 3.85E-05 | hypermethylated |
| cg08465346 | 0.28348 | 0.518596757 | 0.871366 | 1.80E-05 | hypermethylated |
| cg24456002 | 0.29619 | 0.541845405 | 0.871358 | 1.84E-05 | hypermethylated |
| cg12582959 | 0.19728 | 0.360876757 | 0.871262 | 0.000523 | hypermethylated |
| cg17912835 | 0.30585 | 0.559425405 | 0.871121 | 1.06E-05 | hypermethylated |
| cg24638849 | 0.15384 | 0.281361081 | 0.870992 | 2.04E-05 | hypermethylated |
| cg27477419 | 0.18559 | 0.339422703 | 0.870964 | 0.000143 | hypermethylated |
| cg01089319 | 0.21685 | 0.396593514 | 0.870964 | 1.75E-05 | hypermethylated |
| cg23679471 | 0.178   | 0.325537297 | 0.870946 | 6.62E-05 | hypermethylated |
| cg08436419 | 0.34085 | 0.62333027  | 0.87086  | 0.000102 | hypermethylated |
| cg08536841 | 0.22868 | 0.418178919 | 0.87079  | 0.00039  | hypermethylated |
| cg25800765 | 0.21925 | 0.400875676 | 0.870578 | 0.000166 | hypermethylated |
| cg05979020 | 0.26267 | 0.480043784 | 0.869915 | 5.28E-06 | hypermethylated |
| cg04191403 | 0.26545 | 0.48508973  | 0.869811 | 0.002231 | hypermethylated |
| cg13369325 | 0.20607 | 0.376555676 | 0.869729 | 2.89E-05 | hypermethylated |
| cg00646200 | 0.25335 | 0.46295027  | 0.869725 | 7.12E-05 | hypermethylated |

|            |         |             |          |          |                 |
|------------|---------|-------------|----------|----------|-----------------|
| cg08510205 | 0.19166 | 0.350212432 | 0.869681 | 0.000839 | hypermethylated |
| cg16563171 | 0.20754 | 0.379192973 | 0.869543 | 0.000152 | hypermethylated |
| cg00483304 | 0.28439 | 0.519580541 | 0.869477 | 0.000102 | hypermethylated |
| cg21971621 | 0.23329 | 0.426201081 | 0.86941  | 0.00024  | hypermethylated |
| cg19691778 | 0.2206  | 0.40298973  | 0.86931  | 0.000182 | hypermethylated |
| cg13435649 | 0.20287 | 0.370568108 | 0.869183 | 0.000365 | hypermethylated |
| cg24454829 | 0.20905 | 0.38183027  | 0.869083 | 2.39E-05 | hypermethylated |
| cg26858144 | 0.2062  | 0.376609189 | 0.869024 | 0.000506 | hypermethylated |
| cg18675097 | 0.27135 | 0.495587568 | 0.868985 | 0.000187 | hypermethylated |
| cg02525108 | 0.20029 | 0.365737838 | 0.868719 | 2.35E-05 | hypermethylated |
| cg08153621 | 0.26849 | 0.490177838 | 0.868437 | 7.12E-06 | hypermethylated |
| cg21512447 | 0.16564 | 0.302401081 | 0.868412 | 6.95E-05 | hypermethylated |
| cg16263367 | 0.14299 | 0.260988108 | 0.86807  | 0.000113 | hypermethylated |
| cg26375057 | 0.18625 | 0.339855676 | 0.867682 | 2.38E-05 | hypermethylated |
| cg11245681 | 0.3301  | 0.602261081 | 0.867486 | 4.73E-06 | hypermethylated |
| cg23097878 | 0.22944 | 0.418592973 | 0.867431 | 0.002856 | hypermethylated |
| cg00605063 | 0.20329 | 0.370858378 | 0.867329 | 3.23E-05 | hypermethylated |
| cg07778819 | 0.23472 | 0.428192432 | 0.867319 | 0.000152 | hypermethylated |
| cg10111115 | 0.1751  | 0.319330811 | 0.866873 | 0.000245 | hypermethylated |
| cg07851675 | 0.22559 | 0.411408649 | 0.866869 | 8.26E-06 | hypermethylated |
| cg22827250 | 0.25757 | 0.469727027 | 0.866858 | 2.36E-06 | hypermethylated |
| cg02488942 | 0.22482 | 0.409934595 | 0.866623 | 6.22E-06 | hypermethylated |
| cg00752195 | 0.19859 | 0.362044865 | 0.866376 | 2.04E-05 | hypermethylated |
| cg06970510 | 0.25484 | 0.464587027 | 0.866357 | 0.000696 | hypermethylated |
| cg18920097 | 0.24414 | 0.445031892 | 0.8662   | 3.53E-05 | hypermethylated |
| cg02919422 | 0.22626 | 0.412404865 | 0.86608  | 6.57E-06 | hypermethylated |
| cg11368643 | 0.237   | 0.431948649 | 0.865973 | 1.21E-05 | hypermethylated |
| cg27009703 | 0.2914  | 0.531090811 | 0.865958 | 5.58E-06 | hypermethylated |
| cg21932416 | 0.26588 | 0.484557838 | 0.865894 | 0.00039  | hypermethylated |
| cg03883502 | 0.15295 | 0.278703243 | 0.86567  | 1.04E-05 | hypermethylated |
| cg03792162 | 0.25541 | 0.465265946 | 0.865241 | 0.000506 | hypermethylated |
| cg14178794 | 0.19508 | 0.355358378 | 0.865209 | 0.000163 | hypermethylated |
| cg22603275 | 0.1646  | 0.299828108 | 0.865171 | 4.47E-05 | hypermethylated |
| cg05259508 | 0.16014 | 0.291684324 | 0.865074 | 0.000718 | hypermethylated |
| cg18519308 | 0.2377  | 0.432952432 | 0.865067 | 0.000435 | hypermethylated |
| cg00594408 | 0.18161 | 0.33065027  | 0.864462 | 1.21E-05 | hypermethylated |
| cg18972885 | 0.24303 | 0.442458378 | 0.864407 | 0.000155 | hypermethylated |
| cg02409177 | 0.17791 | 0.323851351 | 0.864184 | 2.32E-05 | hypermethylated |
| cg15196197 | 0.24529 | 0.44635027  | 0.863688 | 0.000626 | hypermethylated |
| cg00606739 | 0.20629 | 0.375297838 | 0.863362 | 4.05E-05 | hypermethylated |
| cg06375949 | 0.23172 | 0.421494595 | 0.863132 | 4.88E-05 | hypermethylated |
| cg05569742 | 0.21236 | 0.386237838 | 0.862977 | 9.72E-05 | hypermethylated |
| cg19897071 | 0.24478 | 0.445048649 | 0.862477 | 2.85E-05 | hypermethylated |
| cg10280347 | 0.17014 | 0.309261081 | 0.862103 | 1.06E-05 | hypermethylated |
| cg13099330 | 0.17037 | 0.309604324 | 0.861754 | 0.000134 | hypermethylated |
| cg12265623 | 0.21446 | 0.389656757 | 0.861495 | 1.01E-05 | hypermethylated |
| cg16357224 | 0.19882 | 0.361202703 | 0.861346 | 0.000163 | hypermethylated |
| cg03895392 | 0.1528  | 0.277590811 | 0.861315 | 5.06E-05 | hypermethylated |
| cg04935449 | 0.21513 | 0.390699459 | 0.860851 | 0.000234 | hypermethylated |
| cg04384626 | 0.19086 | 0.346610811 | 0.860802 | 0.000234 | hypermethylated |
| cg20192747 | 0.2676  | 0.485941622 | 0.860705 | 9.82E-06 | hypermethylated |
| cg25731359 | 0.19581 | 0.35555027  | 0.860599 | 0.000109 | hypermethylated |
| cg13316854 | 0.19194 | 0.34846     | 0.860338 | 0.000242 | hypermethylated |
| cg26278454 | 0.21191 | 0.384677297 | 0.860197 | 0.000166 | hypermethylated |
| cg10614025 | 0.16403 | 0.297755676 | 0.860169 | 0.000159 | hypermethylated |
| cg23326689 | 0.25378 | 0.46062     | 0.859999 | 7.84E-05 | hypermethylated |
| cg10792302 | 0.3002  | 0.544758919 | 0.859694 | 0.00024  | hypermethylated |
| cg03052128 | 0.20172 | 0.366046486 | 0.859673 | 5.51E-05 | hypermethylated |

|            |         |             |          |          |                 |
|------------|---------|-------------|----------|----------|-----------------|
| cg13788027 | 0.16594 | 0.301091351 | 0.85954  | 9.57E-06 | hypermethylated |
| cg24641186 | 0.24335 | 0.441501081 | 0.859384 | 8.37E-06 | hypermethylated |
| cg21649089 | 0.30602 | 0.555062162 | 0.859023 | 4.47E-05 | hypermethylated |
| cg09577391 | 0.29594 | 0.536764324 | 0.858984 | 0.001368 | hypermethylated |
| cg24394172 | 0.25876 | 0.469301081 | 0.858899 | 1.12E-05 | hypermethylated |
| cg22455450 | 0.28616 | 0.518882703 | 0.858586 | 0.000166 | hypermethylated |
| cg03799283 | 0.25429 | 0.461084324 | 0.858556 | 5.45E-05 | hypermethylated |
| cg05024939 | 0.22297 | 0.404286486 | 0.858528 | 5.00E-06 | hypermethylated |
| cg09700085 | 0.09926 | 0.179946486 | 0.858284 | 0.000386 | hypermethylated |
| cg18691434 | 0.22167 | 0.401818378 | 0.85813  | 5.72E-05 | hypermethylated |
| cg02154252 | 0.16269 | 0.294901081 | 0.858106 | 6.08E-05 | hypermethylated |
| cg05256483 | 0.19953 | 0.36162973  | 0.857908 | 0.000245 | hypermethylated |
| cg16655791 | 0.17819 | 0.322925405 | 0.857785 | 1.87E-05 | hypermethylated |
| cg06073351 | 0.17328 | 0.314014054 | 0.857724 | 0.000382 | hypermethylated |
| cg02925039 | 0.22293 | 0.403984324 | 0.857709 | 3.00E-05 | hypermethylated |
| cg24427992 | 0.196   | 0.355165946 | 0.85764  | 8.84E-05 | hypermethylated |
| cg03909902 | 0.12114 | 0.219512432 | 0.857627 | 0.00028  | hypermethylated |
| cg11704005 | 0.31347 | 0.568023243 | 0.857623 | 1.04E-05 | hypermethylated |
| cg10244368 | 0.1816  | 0.329052973 | 0.857556 | 0.001188 | hypermethylated |
| cg02841155 | 0.16158 | 0.292661081 | 0.856982 | 0.000445 | hypermethylated |
| cg01261007 | 0.16914 | 0.306254595 | 0.856514 | 5.06E-05 | hypermethylated |
| cg14356396 | 0.16149 | 0.292394054 | 0.856469 | 0.000145 | hypermethylated |
| cg20248516 | 0.26264 | 0.475534054 | 0.856462 | 2.15E-05 | hypermethylated |
| cg23983435 | 0.16852 | 0.305094054 | 0.856334 | 2.21E-05 | hypermethylated |
| cg03547797 | 0.29895 | 0.541070811 | 0.855913 | 6.08E-05 | hypermethylated |
| cg02501779 | 0.23241 | 0.420584324 | 0.855723 | 3.07E-05 | hypermethylated |
| cg03039002 | 0.17799 | 0.322086486 | 0.855652 | 0.000741 | hypermethylated |
| cg09651522 | 0.24317 | 0.444003081 | 0.855639 | 3.15E-05 | hypermethylated |
| cg14345012 | 0.26507 | 0.479608108 | 0.855483 | 1.15E-05 | hypermethylated |
| cg14068328 | 0.16621 | 0.300711892 | 0.855375 | 0.000408 | hypermethylated |
| cg09775260 | 0.1553  | 0.280919459 | 0.855099 | 0.000189 | hypermethylated |
| cg14934413 | 0.232   | 0.419603784 | 0.854903 | 3.40E-05 | hypermethylated |
| cg23448348 | 0.23412 | 0.423417297 | 0.854832 | 0.000613 | hypermethylated |
| cg12758687 | 0.21471 | 0.388302162 | 0.85479  | 1.31E-05 | hypermethylated |
| cg06220449 | 0.17001 | 0.307441081 | 0.85469  | 0.000435 | hypermethylated |
| cg17966560 | 0.33917 | 0.613337838 | 0.854673 | 9.66E-07 | hypermethylated |
| cg00101712 | 0.20776 | 0.375695135 | 0.854645 | 0.0002   | hypermethylated |
| cg06832449 | 0.22111 | 0.399739459 | 0.854296 | 0.000102 | hypermethylated |
| cg05371578 | 0.27851 | 0.503452973 | 0.854128 | 3.26E-06 | hypermethylated |
| cg04935434 | 0.2247  | 0.405991351 | 0.853449 | 3.76E-05 | hypermethylated |
| cg23097402 | 0.24589 | 0.444276216 | 0.853444 | 0.000191 | hypermethylated |
| cg01644927 | 0.15861 | 0.286564865 | 0.853378 | 2.15E-05 | hypermethylated |
| cg25555059 | 0.26606 | 0.480633514 | 0.853186 | 0.000306 | hypermethylated |
| cg19284211 | 0.21419 | 0.386858378 | 0.852914 | 2.71E-05 | hypermethylated |
| cg01729491 | 0.22957 | 0.414607027 | 0.85281  | 3.67E-05 | hypermethylated |
| cg14879760 | 0.27343 | 0.4938      | 0.852755 | 4.64E-05 | hypermethylated |
| cg26142965 | 0.20809 | 0.375784865 | 0.852699 | 6.54E-05 | hypermethylated |
| cg01073178 | 0.10998 | 0.19860973  | 0.852695 | 0.000185 | hypermethylated |
| cg04730685 | 0.25126 | 0.453715135 | 0.852606 | 5.19E-05 | hypermethylated |
| cg04455430 | 0.2069  | 0.373551892 | 0.852375 | 5.28E-06 | hypermethylated |
| cg15929797 | 0.3825  | 0.690497838 | 0.852177 | 1.31E-05 | hypermethylated |
| cg00320094 | 0.31649 | 0.571282703 | 0.852045 | 0.000365 | hypermethylated |
| cg21141234 | 0.15571 | 0.281056216 | 0.851997 | 2.32E-05 | hypermethylated |
| cg13154880 | 0.17917 | 0.323332432 | 0.851689 | 5.79E-05 | hypermethylated |
| cg17931641 | 0.17029 | 0.307196757 | 0.851169 | 7.03E-05 | hypermethylated |
| cg19639898 | 0.21786 | 0.392947027 | 0.850934 | 3.76E-05 | hypermethylated |
| cg25950278 | 0.2179  | 0.393011351 | 0.850905 | 0.000142 | hypermethylated |
| cg23262218 | 0.23882 | 0.430707027 | 0.850783 | 1.30E-05 | hypermethylated |



|            |         |             |          |          |                 |
|------------|---------|-------------|----------|----------|-----------------|
| cg08258922 | 0.18513 | 0.333864865 | 0.850726 | 0.000138 | hypermethylated |
| cg20370678 | 0.25106 | 0.452751351 | 0.850687 | 0.000104 | hypermethylated |
| cg05444816 | 0.2226  | 0.401425405 | 0.850678 | 3.23E-05 | hypermethylated |
| cg04554928 | 0.22645 | 0.408359459 | 0.850647 | 6.39E-06 | hypermethylated |
| cg25600766 | 0.20815 | 0.375355676 | 0.850635 | 0.000191 | hypermethylated |
| cg00998124 | 0.21189 | 0.382061622 | 0.85049  | 0.000142 | hypermethylated |
| cg12787323 | 0.24596 | 0.443487568 | 0.85047  | 0.000293 | hypermethylated |
| cg25952581 | 0.21631 | 0.389909189 | 0.850038 | 2.32E-05 | hypermethylated |
| cg17137424 | 0.26132 | 0.470993514 | 0.84989  | 0.000163 | hypermethylated |
| cg27343616 | 0.15306 | 0.275868108 | 0.849881 | 3.19E-05 | hypermethylated |
| cg19909239 | 0.20062 | 0.361452973 | 0.849343 | 4.42E-05 | hypermethylated |
| cg01727145 | 0.30641 | 0.55204973  | 0.849335 | 7.03E-06 | hypermethylated |
| cg04961101 | 0.25664 | 0.462375676 | 0.849319 | 2.36E-06 | hypermethylated |
| cg02829688 | 0.20622 | 0.371517838 | 0.849247 | 1.04E-05 | hypermethylated |
| cg05637536 | 0.23388 | 0.421300541 | 0.849081 | 4.48E-06 | hypermethylated |
| cg21769619 | 0.2107  | 0.379505405 | 0.84893  | 1.15E-05 | hypermethylated |
| cg24700462 | 0.17387 | 0.313109189 | 0.848657 | 3.23E-05 | hypermethylated |
| cg20233073 | 0.18864 | 0.339593514 | 0.848173 | 0.000157 | hypermethylated |
| cg24122498 | 0.26737 | 0.481222703 | 0.847867 | 1.60E-05 | hypermethylated |
| cg07362328 | 0.18475 | 0.332482703 | 0.847705 | 0.0002   | hypermethylated |
| cg03514351 | 0.21268 | 0.382697838 | 0.847521 | 6.95E-05 | hypermethylated |
| cg09559189 | 0.30174 | 0.542890811 | 0.847356 | 2.10E-05 | hypermethylated |
| cg01382864 | 0.25227 | 0.453805405 | 0.847105 | 5.51E-05 | hypermethylated |
| cg07250162 | 0.20084 | 0.361206486 | 0.846777 | 3.15E-05 | hypermethylated |
| cg25317941 | 0.2179  | 0.391861081 | 0.846676 | 7.12E-05 | hypermethylated |
| cg07271394 | 0.18635 | 0.33506973  | 0.846447 | 7.52E-06 | hypermethylated |
| cg13347970 | 0.19675 | 0.353723243 | 0.846257 | 0.00017  | hypermethylated |
| cg19005707 | 0.21004 | 0.377608649 | 0.846228 | 4.70E-05 | hypermethylated |
| cg07260592 | 0.26731 | 0.480538919 | 0.846139 | 4.26E-05 | hypermethylated |
| cg16969368 | 0.23101 | 0.415277297 | 0.84612  | 0.000129 | hypermethylated |
| cg00422918 | 0.16759 | 0.301147568 | 0.845535 | 1.31E-05 | hypermethylated |
| cg03906434 | 0.25263 | 0.453916216 | 0.8454   | 0.000613 | hypermethylated |
| cg08589354 | 0.22745 | 0.408642162 | 0.845289 | 0.000132 | hypermethylated |
| cg12969193 | 0.30022 | 0.539376216 | 0.845272 | 4.58E-05 | hypermethylated |
| cg23519626 | 0.22928 | 0.411918378 | 0.845248 | 0.000191 | hypermethylated |
| cg09544728 | 0.33446 | 0.600856757 | 0.845187 | 0.002502 | hypermethylated |
| cg17884843 | 0.21005 | 0.377343243 | 0.845145 | 1.01E-05 | hypermethylated |
| cg02892388 | 0.24275 | 0.436063243 | 0.845066 | 0.000132 | hypermethylated |
| cg06082548 | 0.1468  | 0.263697838 | 0.845034 | 7.12E-05 | hypermethylated |
| cg02646491 | 0.25523 | 0.458419459 | 0.84487  | 1.80E-05 | hypermethylated |
| cg14473344 | 0.19842 | 0.356375135 | 0.844839 | 3.95E-05 | hypermethylated |
| cg24114014 | 0.31619 | 0.567883243 | 0.844803 | 1.09E-05 | hypermethylated |
| cg05000994 | 0.27736 | 0.498122162 | 0.84474  | 0.000115 | hypermethylated |
| cg14241370 | 0.16816 | 0.301995135 | 0.844691 | 0.000104 | hypermethylated |
| cg16235582 | 0.26977 | 0.484468108 | 0.844672 | 3.44E-05 | hypermethylated |
| cg05577810 | 0.21538 | 0.38678973  | 0.844665 | 0.000551 | hypermethylated |
| cg21011616 | 0.21194 | 0.380609189 | 0.844654 | 0.000148 | hypermethylated |
| cg14611112 | 0.33516 | 0.601858919 | 0.844575 | 6.01E-05 | hypermethylated |
| cg19537719 | 0.32536 | 0.58416973  | 0.844351 | 0.000152 | hypermethylated |
| cg04460847 | 0.2105  | 0.377935676 | 0.84432  | 6.31E-05 | hypermethylated |
| cg10265690 | 0.16043 | 0.288027568 | 0.844263 | 7.20E-05 | hypermethylated |
| cg02598872 | 0.19565 | 0.351258919 | 0.84426  | 6.15E-05 | hypermethylated |
| cg14355134 | 0.20955 | 0.376078378 | 0.843739 | 0.000138 | hypermethylated |
| cg11668749 | 0.24038 | 0.431235135 | 0.843158 | 3.00E-05 | hypermethylated |
| cg12011136 | 0.20212 | 0.362587568 | 0.843117 | 6.08E-05 | hypermethylated |
| cg09408917 | 0.20663 | 0.370654054 | 0.843024 | 2.39E-05 | hypermethylated |
| cg04175027 | 0.27024 | 0.484632432 | 0.84265  | 6.15E-05 | hypermethylated |
| cg14891410 | 0.29183 | 0.523262162 | 0.842406 | 0.000117 | hypermethylated |

|            |         |             |          |          |                 |
|------------|---------|-------------|----------|----------|-----------------|
| cg06675478 | 0.20619 | 0.369695676 | 0.842364 | 1.12E-05 | hypermethylated |
| cg12606911 | 0.32171 | 0.576455676 | 0.841449 | 4.76E-05 | hypermethylated |
| cg03239638 | 0.10523 | 0.188551892 | 0.841416 | 0.000274 | hypermethylated |
| cg10848640 | 0.27241 | 0.488071892 | 0.841314 | 6.05E-06 | hypermethylated |
| cg08463758 | 0.24546 | 0.439750811 | 0.841198 | 3.40E-05 | hypermethylated |
| cg14427009 | 0.25882 | 0.463654595 | 0.841101 | 5.43E-06 | hypermethylated |
| cg18000029 | 0.19977 | 0.357819459 | 0.840892 | 1.75E-05 | hypermethylated |
| cg12590600 | 0.21215 | 0.379983243 | 0.840851 | 3.04E-05 | hypermethylated |
| cg03602029 | 0.25496 | 0.456549189 | 0.840499 | 1.84E-05 | hypermethylated |
| cg07335915 | 0.19062 | 0.341325405 | 0.840448 | 4.00E-05 | hypermethylated |
| cg20969194 | 0.17831 | 0.319116757 | 0.839697 | 0.000104 | hypermethylated |
| cg20038591 | 0.21455 | 0.38395027  | 0.839606 | 4.70E-05 | hypermethylated |
| cg11479165 | 0.19082 | 0.341472432 | 0.839557 | 0.000101 | hypermethylated |
| cg13564742 | 0.2183  | 0.390640541 | 0.83953  | 0.000178 | hypermethylated |
| cg10543982 | 0.17744 | 0.317500541 | 0.839428 | 3.85E-05 | hypermethylated |
| cg06707978 | 0.1899  | 0.339734054 | 0.839166 | 2.10E-05 | hypermethylated |
| cg04839289 | 0.22596 | 0.404163784 | 0.838873 | 1.12E-05 | hypermethylated |
| cg10923662 | 0.29953 | 0.535741622 | 0.838837 | 0.001949 | hypermethylated |
| cg00419702 | 0.21271 | 0.380407568 | 0.838658 | 0.00028  | hypermethylated |
| cg00034468 | 0.24651 | 0.4408      | 0.838478 | 6.22E-06 | hypermethylated |
| cg04271218 | 0.17513 | 0.313109189 | 0.83824  | 9.38E-05 | hypermethylated |
| cg08162222 | 0.17092 | 0.305549189 | 0.838083 | 0.000142 | hypermethylated |
| cg02109484 | 0.252   | 0.450456757 | 0.837965 | 6.78E-05 | hypermethylated |
| cg08346922 | 0.2477  | 0.44277027  | 0.837964 | 1.66E-05 | hypermethylated |
| cg01962146 | 0.19306 | 0.344857838 | 0.836952 | 6.08E-05 | hypermethylated |
| cg24818566 | 0.19819 | 0.354004865 | 0.836885 | 2.78E-05 | hypermethylated |
| cg06755825 | 0.20224 | 0.361187027 | 0.836678 | 5.65E-05 | hypermethylated |
| cg00187692 | 0.38616 | 0.689477297 | 0.836304 | 0.001164 | hypermethylated |
| cg10472919 | 0.33376 | 0.595796757 | 0.836009 | 7.72E-06 | hypermethylated |
| cg26479630 | 0.19432 | 0.346877838 | 0.835993 | 3.49E-05 | hypermethylated |
| cg16458866 | 0.25612 | 0.457155135 | 0.835864 | 0.000594 | hypermethylated |
| cg15439725 | 0.29389 | 0.524552973 | 0.835812 | 0.000613 | hypermethylated |
| cg09473315 | 0.26108 | 0.465953514 | 0.835694 | 5.72E-05 | hypermethylated |
| cg07822928 | 0.201   | 0.358643784 | 0.835356 | 0.000166 | hypermethylated |
| cg15588215 | 0.20094 | 0.358503243 | 0.835221 | 9.49E-05 | hypermethylated |
| cg09670535 | 0.24185 | 0.431462703 | 0.835123 | 1.12E-05 | hypermethylated |
| cg18252039 | 0.23922 | 0.426706486 | 0.834906 | 1.28E-05 | hypermethylated |
| cg10124710 | 0.26597 | 0.474028649 | 0.833711 | 3.57E-05 | hypermethylated |
| cg19358442 | 0.18845 | 0.335861622 | 0.833685 | 0.000104 | hypermethylated |
| cg15608397 | 0.21051 | 0.375100541 | 0.833389 | 6.86E-05 | hypermethylated |
| cg00346208 | 0.26695 | 0.475428649 | 0.832659 | 2.51E-05 | hypermethylated |
| cg03350439 | 0.19629 | 0.349583243 | 0.832649 | 2.51E-05 | hypermethylated |
| cg05053440 | 0.25513 | 0.454295676 | 0.832399 | 0.000122 | hypermethylated |
| cg03330485 | 0.21131 | 0.376255676 | 0.832352 | 9.05E-05 | hypermethylated |
| cg04428163 | 0.28046 | 0.499376216 | 0.832332 | 1.82E-05 | hypermethylated |
| cg15668533 | 0.19341 | 0.344376757 | 0.832325 | 8.83E-06 | hypermethylated |
| cg00088797 | 0.34441 | 0.61322973  | 0.832301 | 3.49E-05 | hypermethylated |
| cg00561194 | 0.31628 | 0.563014054 | 0.831969 | 2.95E-06 | hypermethylated |
| cg26654798 | 0.2448  | 0.435742162 | 0.831871 | 3.40E-05 | hypermethylated |
| cg14334441 | 0.17803 | 0.316886486 | 0.831846 | 7.38E-05 | hypermethylated |
| cg15422005 | 0.207   | 0.36841027  | 0.831683 | 9.49E-05 | hypermethylated |
| cg24340081 | 0.25929 | 0.461445405 | 0.831593 | 0.000107 | hypermethylated |
| cg12078229 | 0.22765 | 0.405123784 | 0.831545 | 2.04E-05 | hypermethylated |
| cg21389309 | 0.21693 | 0.386003784 | 0.831385 | 0.00097  | hypermethylated |
| cg17160984 | 0.27613 | 0.491323784 | 0.831326 | 9.72E-05 | hypermethylated |
| cg16953816 | 0.37604 | 0.669085405 | 0.831304 | 0.000772 | hypermethylated |
| cg21621538 | 0.24442 | 0.434892973 | 0.831298 | 0.000245 | hypermethylated |
| cg03598754 | 0.12681 | 0.225626486 | 0.831268 | 0.000749 | hypermethylated |

|            |         |             |          |          |                 |
|------------|---------|-------------|----------|----------|-----------------|
| cg18482892 | 0.20585 | 0.366251351 | 0.831241 | 0.001635 | hypermethylated |
| cg23642747 | 0.21047 | 0.374394054 | 0.830943 | 0.000224 | hypermethylated |
| cg09619146 | 0.28326 | 0.503819459 | 0.83078  | 2.15E-05 | hypermethylated |
| cg06668065 | 0.29794 | 0.529895135 | 0.830685 | 0.000262 | hypermethylated |
| cg06896909 | 0.30994 | 0.551226486 | 0.830656 | 1.42E-05 | hypermethylated |
| cg01927745 | 0.25442 | 0.452431351 | 0.830487 | 5.43E-06 | hypermethylated |
| cg26123256 | 0.2513  | 0.446849189 | 0.830377 | 0.000107 | hypermethylated |
| cg00992850 | 0.26152 | 0.46496     | 0.830185 | 6.46E-05 | hypermethylated |
| cg25781755 | 0.27929 | 0.496503784 | 0.830041 | 0.00044  | hypermethylated |
| cg11230940 | 0.28084 | 0.499225405 | 0.829943 | 2.45E-05 | hypermethylated |
| cg14811102 | 0.18751 | 0.333284865 | 0.829788 | 0.001141 | hypermethylated |
| cg19855470 | 0.20285 | 0.360543243 | 0.829759 | 2.49E-06 | hypermethylated |
| cg03086707 | 0.27233 | 0.484022703 | 0.829719 | 0.00048  | hypermethylated |
| cg10343742 | 0.20767 | 0.369099459 | 0.829717 | 2.49E-06 | hypermethylated |
| cg12409982 | 0.21109 | 0.375147027 | 0.829598 | 7.12E-05 | hypermethylated |
| cg00055986 | 0.2314  | 0.411220541 | 0.829523 | 0.000464 | hypermethylated |
| cg05021643 | 0.25557 | 0.454156757 | 0.829472 | 1.11E-05 | hypermethylated |
| cg18541254 | 0.24137 | 0.428894054 | 0.829375 | 5.73E-06 | hypermethylated |
| cg20884298 | 0.18678 | 0.331854595 | 0.829211 | 0.000195 | hypermethylated |
| cg05596328 | 0.2089  | 0.371081081 | 0.828922 | 8.42E-05 | hypermethylated |
| cg27631817 | 0.25955 | 0.461009189 | 0.828783 | 0.000126 | hypermethylated |
| cg26356061 | 0.24466 | 0.434547027 | 0.828734 | 0.000102 | hypermethylated |
| cg21293934 | 0.23274 | 0.413374054 | 0.828729 | 0.000335 | hypermethylated |
| cg00708598 | 0.22694 | 0.403058919 | 0.82868  | 5.31E-05 | hypermethylated |
| cg07211044 | 0.25373 | 0.450585946 | 0.828508 | 0.000135 | hypermethylated |
| cg02919960 | 0.20842 | 0.37008973  | 0.828381 | 1.04E-05 | hypermethylated |
| cg25573227 | 0.26633 | 0.472842703 | 0.828145 | 0.000112 | hypermethylated |
| cg12651914 | 0.27892 | 0.495102703 | 0.827876 | 0.000214 | hypermethylated |
| cg23578346 | 0.25073 | 0.445032973 | 0.827778 | 3.11E-05 | hypermethylated |
| cg27540865 | 0.26915 | 0.477645946 | 0.827531 | 0.000204 | hypermethylated |
| cg22494858 | 0.17881 | 0.317300541 | 0.827423 | 0.000107 | hypermethylated |
| cg01621054 | 0.15622 | 0.277207568 | 0.827387 | 3.62E-05 | hypermethylated |
| cg20119106 | 0.20696 | 0.367223243 | 0.827305 | 9.49E-05 | hypermethylated |
| cg14612428 | 0.21378 | 0.379282703 | 0.827147 | 3.32E-05 | hypermethylated |
| cg02943604 | 0.24472 | 0.434095676 | 0.826881 | 2.64E-05 | hypermethylated |
| cg22275864 | 0.27282 | 0.483878919 | 0.826697 | 1.84E-05 | hypermethylated |
| cg11935147 | 0.20712 | 0.36733027  | 0.826611 | 7.74E-05 | hypermethylated |
| cg03506028 | 0.30873 | 0.547471892 | 0.826439 | 9.31E-06 | hypermethylated |
| cg19747232 | 0.17578 | 0.311697297 | 0.826375 | 0.00101  | hypermethylated |
| cg06966811 | 0.27852 | 0.493821081 | 0.826207 | 2.79E-06 | hypermethylated |
| cg15954353 | 0.30588 | 0.542329189 | 0.826203 | 0.003914 | hypermethylated |
| cg04837832 | 0.26081 | 0.462354054 | 0.825999 | 6.48E-06 | hypermethylated |
| cg01565438 | 0.25984 | 0.460611892 | 0.825928 | 5.19E-05 | hypermethylated |
| cg03300268 | 0.14373 | 0.254721622 | 0.82556  | 9.69E-06 | hypermethylated |
| cg21934311 | 0.17446 | 0.309178919 | 0.825546 | 3.07E-05 | hypermethylated |
| cg02518135 | 0.23152 | 0.4102      | 0.825191 | 3.04E-05 | hypermethylated |
| cg15726426 | 0.22375 | 0.39641027  | 0.825107 | 1.89E-05 | hypermethylated |
| cg22668218 | 0.29126 | 0.515989189 | 0.825033 | 0.000166 | hypermethylated |
| cg14563954 | 0.24314 | 0.430625946 | 0.824648 | 6.46E-05 | hypermethylated |
| cg18534176 | 0.19007 | 0.336625946 | 0.824616 | 1.01E-05 | hypermethylated |
| cg04787888 | 0.28097 | 0.497558378 | 0.82445  | 0.000166 | hypermethylated |
| cg12031863 | 0.26863 | 0.475686486 | 0.824391 | 0.000219 | hypermethylated |
| cg09325156 | 0.1641  | 0.290536216 | 0.824143 | 0.000214 | hypermethylated |
| cg23032674 | 0.22243 | 0.393724865 | 0.823836 | 7.84E-05 | hypermethylated |
| cg15812020 | 0.26986 | 0.477645946 | 0.82373  | 1.89E-05 | hypermethylated |
| cg00784153 | 0.27483 | 0.486314054 | 0.823349 | 7.56E-05 | hypermethylated |
| cg03950614 | 0.21091 | 0.373193514 | 0.823296 | 6.31E-05 | hypermethylated |
| cg20347139 | 0.25013 | 0.442536757 | 0.823119 | 4.82E-05 | hypermethylated |

|            |         |             |          |          |                 |
|------------|---------|-------------|----------|----------|-----------------|
| cg10511988 | 0.2763  | 0.488705405 | 0.822729 | 0.0006   | hypermethylated |
| cg22212237 | 0.18532 | 0.327772432 | 0.822676 | 4.05E-05 | hypermethylated |
| cg03244696 | 0.17275 | 0.305479459 | 0.82239  | 0.000154 | hypermethylated |
| cg17526175 | 0.25404 | 0.449225405 | 0.822384 | 0.001288 | hypermethylated |
| cg23676302 | 0.23292 | 0.411855676 | 0.822304 | 0.000342 | hypermethylated |
| cg25452071 | 0.18638 | 0.329556216 | 0.822278 | 5.86E-05 | hypermethylated |
| cg00507008 | 0.28297 | 0.500306486 | 0.822163 | 9.27E-05 | hypermethylated |
| cg09528449 | 0.23402 | 0.413708108 | 0.821981 | 0.000109 | hypermethylated |
| cg04624228 | 0.12852 | 0.227195135 | 0.821939 | 0.002777 | hypermethylated |
| cg15991405 | 0.31858 | 0.563108649 | 0.821758 | 3.57E-05 | hypermethylated |
| cg16798252 | 0.22538 | 0.398317838 | 0.821561 | 2.45E-05 | hypermethylated |
| cg24250393 | 0.19547 | 0.345455135 | 0.821551 | 5.72E-05 | hypermethylated |
| cg01658421 | 0.24632 | 0.43526     | 0.821344 | 3.67E-05 | hypermethylated |
| cg21476673 | 0.23781 | 0.420058919 | 0.820782 | 1.48E-05 | hypermethylated |
| cg22389137 | 0.19897 | 0.351442703 | 0.820739 | 5.79E-05 | hypermethylated |
| cg07716052 | 0.24731 | 0.436744865 | 0.82047  | 5.28E-06 | hypermethylated |
| cg08206318 | 0.24491 | 0.432404324 | 0.820129 | 1.84E-05 | hypermethylated |
| cg12459904 | 0.23659 | 0.417628108 | 0.81983  | 0.000191 | hypermethylated |
| cg24549912 | 0.26601 | 0.469558378 | 0.819824 | 0.000324 | hypermethylated |
| cg24586758 | 0.2566  | 0.452938378 | 0.819794 | 0.000681 | hypermethylated |
| cg03368099 | 0.26816 | 0.473305405 | 0.819677 | 0.000358 | hypermethylated |
| cg04157263 | 0.23536 | 0.415209189 | 0.818969 | 3.67E-05 | hypermethylated |
| cg18404374 | 0.31363 | 0.553224865 | 0.818802 | 2.92E-05 | hypermethylated |
| cg00965023 | 0.21159 | 0.373210811 | 0.818719 | 2.32E-05 | hypermethylated |
| cg14243778 | 0.28977 | 0.511032973 | 0.818508 | 8.03E-05 | hypermethylated |
| cg14855519 | 0.30295 | 0.534267027 | 0.818481 | 2.48E-05 | hypermethylated |
| cg15372603 | 0.25137 | 0.443261622 | 0.818346 | 0.000214 | hypermethylated |
| cg10536898 | 0.39644 | 0.699073514 | 0.818342 | 2.79E-06 | hypermethylated |
| cg08066129 | 0.22    | 0.387795135 | 0.817791 | 8.13E-05 | hypermethylated |
| cg10806820 | 0.20521 | 0.361651351 | 0.817499 | 1.48E-05 | hypermethylated |
| cg11796455 | 0.26254 | 0.462644865 | 0.817368 | 3.23E-05 | hypermethylated |
| cg12864185 | 0.22624 | 0.398642703 | 0.817242 | 8.94E-05 | hypermethylated |
| cg22227345 | 0.20165 | 0.355314054 | 0.817241 | 7.29E-05 | hypermethylated |
| cg18777299 | 0.28489 | 0.501916216 | 0.817042 | 4.42E-05 | hypermethylated |
| cg19702785 | 0.19497 | 0.343469189 | 0.816929 | 1.35E-05 | hypermethylated |
| cg01304890 | 0.16363 | 0.288241081 | 0.816839 | 5.19E-05 | hypermethylated |
| cg25221239 | 0.31477 | 0.554401081 | 0.816632 | 2.24E-05 | hypermethylated |
| cg02282631 | 0.32248 | 0.567903784 | 0.816437 | 0.000653 | hypermethylated |
| cg22331862 | 0.26111 | 0.45981027  | 0.816381 | 3.15E-05 | hypermethylated |
| cg26682068 | 0.20713 | 0.364731351 | 0.816298 | 1.58E-05 | hypermethylated |
| cg25365260 | 0.20171 | 0.355174595 | 0.816246 | 9.27E-05 | hypermethylated |
| cg07520506 | 0.35901 | 0.632094054 | 0.816115 | 7.84E-05 | hypermethylated |
| cg23026602 | 0.17754 | 0.312569189 | 0.816031 | 0.000313 | hypermethylated |
| cg14950829 | 0.29801 | 0.524645946 | 0.815983 | 1.31E-05 | hypermethylated |
| cg06809252 | 0.31015 | 0.546005946 | 0.815951 | 0.000454 | hypermethylated |
| cg05236677 | 0.16835 | 0.29636     | 0.815887 | 0.000219 | hypermethylated |
| cg21366688 | 0.38599 | 0.679324324 | 0.815537 | 0.000517 | hypermethylated |
| cg26885268 | 0.28845 | 0.507559459 | 0.815256 | 5.00E-05 | hypermethylated |
| cg06953773 | 0.17999 | 0.316683784 | 0.815126 | 0.000212 | hypermethylated |
| cg19120389 | 0.16386 | 0.288246486 | 0.814839 | 0.000454 | hypermethylated |
| cg12196232 | 0.21132 | 0.371694054 | 0.814686 | 2.10E-05 | hypermethylated |
| cg04080041 | 0.222   | 0.390444324 | 0.814557 | 2.57E-05 | hypermethylated |
| cg24113409 | 0.26942 | 0.473818378 | 0.814477 | 2.83E-06 | hypermethylated |
| cg18500733 | 0.1985  | 0.349058378 | 0.814329 | 5.00E-05 | hypermethylated |
| cg22490780 | 0.34605 | 0.608363784 | 0.813954 | 0.000262 | hypermethylated |
| cg17310600 | 0.27055 | 0.475525946 | 0.813629 | 4.82E-05 | hypermethylated |
| cg12571423 | 0.21152 | 0.371754054 | 0.813554 | 0.000134 | hypermethylated |
| cg19049194 | 0.24281 | 0.426735676 | 0.813515 | 2.21E-05 | hypermethylated |

|            |         |             |          |          |                 |
|------------|---------|-------------|----------|----------|-----------------|
| cg13113525 | 0.1626  | 0.285747027 | 0.813411 | 0.000848 | hypermethylated |
| cg04982308 | 0.26939 | 0.473383784 | 0.813314 | 0.000187 | hypermethylated |
| cg11665991 | 0.19827 | 0.348381622 | 0.813202 | 0.000403 | hypermethylated |
| cg23705224 | 0.1877  | 0.329749189 | 0.81294  | 0.000313 | hypermethylated |
| cg04302194 | 0.17996 | 0.316137838 | 0.812877 | 0.000107 | hypermethylated |
| cg21255438 | 0.21938 | 0.385327568 | 0.812653 | 2.91E-06 | hypermethylated |
| cg02676375 | 0.19618 | 0.344561081 | 0.812582 | 9.52E-07 | hypermethylated |
| cg03236397 | 0.21848 | 0.383724324 | 0.812569 | 0.000256 | hypermethylated |
| cg05043461 | 0.18512 | 0.32508973  | 0.812377 | 8.63E-05 | hypermethylated |
| cg09917979 | 0.17928 | 0.314834054 | 0.812377 | 0.000221 | hypermethylated |
| cg10101521 | 0.20012 | 0.35142973  | 0.812371 | 4.15E-05 | hypermethylated |
| cg10850791 | 0.16234 | 0.285082162 | 0.812359 | 0.000674 | hypermethylated |
| cg16196812 | 0.21704 | 0.381117838 | 0.812276 | 2.71E-05 | hypermethylated |
| cg19165390 | 0.24121 | 0.423518919 | 0.812137 | 1.58E-05 | hypermethylated |
| cg14509153 | 0.17848 | 0.313325405 | 0.811899 | 0.000435 | hypermethylated |
| cg01028849 | 0.23831 | 0.418310811 | 0.811736 | 6.01E-05 | hypermethylated |
| cg24715245 | 0.25068 | 0.44001027  | 0.81169  | 7.93E-06 | hypermethylated |
| cg18120446 | 0.28209 | 0.495107568 | 0.811586 | 3.85E-05 | hypermethylated |
| cg23331484 | 0.28585 | 0.501653514 | 0.811433 | 9.95E-05 | hypermethylated |
| cg13492364 | 0.23723 | 0.416170811 | 0.810889 | 0.000166 | hypermethylated |
| cg06776146 | 0.20836 | 0.365354595 | 0.810219 | 4.88E-05 | hypermethylated |
| cg12539415 | 0.29595 | 0.518923243 | 0.810168 | 0.000138 | hypermethylated |
| cg19335130 | 0.24756 | 0.434039459 | 0.810048 | 7.56E-05 | hypermethylated |
| cg22488857 | 0.20691 | 0.362722162 | 0.809862 | 0.0003   | hypermethylated |
| cg11256607 | 0.18715 | 0.328081622 | 0.80986  | 6.54E-05 | hypermethylated |
| cg14548272 | 0.2215  | 0.388280541 | 0.809793 | 8.94E-05 | hypermethylated |
| cg11618529 | 0.20463 | 0.358662703 | 0.80961  | 1.62E-05 | hypermethylated |
| cg08793792 | 0.20842 | 0.365295676 | 0.809571 | 0.000202 | hypermethylated |
| cg23677657 | 0.29195 | 0.511574595 | 0.809223 | 1.31E-05 | hypermethylated |
| cg12074182 | 0.21179 | 0.371021622 | 0.808869 | 3.69E-06 | hypermethylated |
| cg13242000 | 0.2343  | 0.410367568 | 0.80856  | 5.06E-05 | hypermethylated |
| cg20016673 | 0.26296 | 0.460438919 | 0.808166 | 0.00012  | hypermethylated |
| cg16667279 | 0.19643 | 0.343917297 | 0.808046 | 9.95E-05 | hypermethylated |
| cg04915044 | 0.3033  | 0.530863784 | 0.807596 | 7.84E-05 | hypermethylated |
| cg27596495 | 0.17356 | 0.303763784 | 0.807515 | 0.000166 | hypermethylated |
| cg12517027 | 0.15448 | 0.270281622 | 0.807043 | 0.001751 | hypermethylated |
| cg13193239 | 0.21079 | 0.368747027 | 0.806825 | 1.84E-05 | hypermethylated |
| cg15235999 | 0.28541 | 0.499177838 | 0.806518 | 0.00039  | hypermethylated |
| cg02646021 | 0.19288 | 0.33727027  | 0.806202 | 0.000107 | hypermethylated |
| cg05290820 | 0.25799 | 0.451078919 | 0.806065 | 0.001803 | hypermethylated |
| cg22686132 | 0.37154 | 0.6496      | 0.806034 | 0.00513  | hypermethylated |
| cg13130031 | 0.22205 | 0.388161081 | 0.805771 | 2.96E-05 | hypermethylated |
| cg05096751 | 0.20845 | 0.364385405 | 0.805764 | 6.78E-05 | hypermethylated |
| cg05771369 | 0.26454 | 0.462318919 | 0.805403 | 3.44E-05 | hypermethylated |
| cg27598107 | 0.29337 | 0.5127      | 0.805394 | 0.001301 | hypermethylated |
| cg06232807 | 0.29562 | 0.516628108 | 0.805382 | 1.62E-05 | hypermethylated |
| cg19777067 | 0.29033 | 0.507324865 | 0.805216 | 0.000464 | hypermethylated |
| cg22729726 | 0.31779 | 0.555302162 | 0.805199 | 6.84E-06 | hypermethylated |
| cg08715595 | 0.26585 | 0.464516216 | 0.805116 | 6.75E-06 | hypermethylated |
| cg12869949 | 0.17737 | 0.309876216 | 0.80493  | 4.88E-05 | hypermethylated |
| cg03970615 | 0.18015 | 0.314726486 | 0.8049   | 9.49E-05 | hypermethylated |
| cg24864241 | 0.21839 | 0.381454595 | 0.804605 | 0.000143 | hypermethylated |
| cg25782229 | 0.26577 | 0.464191351 | 0.804541 | 0.000126 | hypermethylated |
| cg06012215 | 0.26946 | 0.470605946 | 0.804448 | 7.32E-06 | hypermethylated |
| cg22920700 | 0.2516  | 0.43937027  | 0.804305 | 0.000187 | hypermethylated |
| cg02037307 | 0.30544 | 0.533371892 | 0.804253 | 7.29E-05 | hypermethylated |
| cg12133554 | 0.27619 | 0.482292973 | 0.804249 | 0.000115 | hypermethylated |
| cg02400433 | 0.1781  | 0.311001081 | 0.804232 | 6.08E-05 | hypermethylated |

|            |         |             |          |          |                 |
|------------|---------|-------------|----------|----------|-----------------|
| cg21776577 | 0.36345 | 0.634567027 | 0.804016 | 0.000528 | hypermethylated |
| cg03807316 | 0.22666 | 0.39569027  | 0.803842 | 7.12E-05 | hypermethylated |
| cg02228815 | 0.14476 | 0.252705946 | 0.803797 | 8.84E-05 | hypermethylated |
| cg20348858 | 0.19885 | 0.347034054 | 0.803397 | 7.52E-06 | hypermethylated |
| cg08202494 | 0.25845 | 0.450925946 | 0.803005 | 9.07E-06 | hypermethylated |
| cg15126179 | 0.26137 | 0.455949189 | 0.80278  | 4.26E-05 | hypermethylated |
| cg19988426 | 0.36159 | 0.630742703 | 0.802697 | 0.000417 | hypermethylated |
| cg22719241 | 0.32834 | 0.572732432 | 0.802671 | 0.000382 | hypermethylated |
| cg15499368 | 0.20587 | 0.359062162 | 0.8025   | 1.18E-05 | hypermethylated |
| cg03925294 | 0.21364 | 0.372572973 | 0.802341 | 2.02E-05 | hypermethylated |
| cg06688989 | 0.22831 | 0.398091892 | 0.802107 | 0.000209 | hypermethylated |
| cg21501525 | 0.25051 | 0.43678     | 0.802039 | 0.000182 | hypermethylated |
| cg23995914 | 0.278   | 0.484708649 | 0.802033 | 3.32E-05 | hypermethylated |
| cg15641657 | 0.20413 | 0.355894054 | 0.80196  | 0.000274 | hypermethylated |
| cg23509641 | 0.21875 | 0.381382703 | 0.801956 | 0.000523 | hypermethylated |
| cg20643029 | 0.23731 | 0.413739459 | 0.80195  | 7.29E-05 | hypermethylated |
| cg27024272 | 0.19505 | 0.340035135 | 0.80184  | 0.000563 | hypermethylated |
| cg23993425 | 0.24054 | 0.419244324 | 0.801514 | 6.31E-05 | hypermethylated |
| cg06645033 | 0.30089 | 0.524217297 | 0.800929 | 4.26E-05 | hypermethylated |
| cg15607672 | 0.28341 | 0.493749189 | 0.800888 | 0.000256 | hypermethylated |
| cg23548627 | 0.26295 | 0.458093514 | 0.800854 | 3.95E-05 | hypermethylated |
| cg09829551 | 0.18632 | 0.324576216 | 0.800775 | 0.000382 | hypermethylated |
| cg03151469 | 0.24127 | 0.420262162 | 0.800641 | 6.62E-05 | hypermethylated |
| cg18555440 | 0.17785 | 0.309764324 | 0.80051  | 4.94E-05 | hypermethylated |
| cg18194945 | 0.26626 | 0.463617297 | 0.800099 | 1.80E-05 | hypermethylated |
| cg27246129 | 0.24867 | 0.43295027  | 0.799969 | 0.003316 | hypermethylated |
| cg04622802 | 0.24942 | 0.434231351 | 0.799887 | 0.000134 | hypermethylated |
| cg15801340 | 0.2079  | 0.36191027  | 0.799742 | 4.30E-06 | hypermethylated |
| cg10890302 | 0.31496 | 0.54826973  | 0.799717 | 0.002599 | hypermethylated |
| cg06429887 | 0.37488 | 0.652456757 | 0.799453 | 9.38E-05 | hypermethylated |
| cg26094789 | 0.29674 | 0.516451351 | 0.799433 | 5.35E-06 | hypermethylated |
| cg01310750 | 0.2493  | 0.433841622 | 0.799286 | 0.000107 | hypermethylated |
| cg04194947 | 0.3763  | 0.654820541 | 0.799216 | 5.65E-05 | hypermethylated |
| cg05213896 | 0.27482 | 0.478190811 | 0.799099 | 7.12E-05 | hypermethylated |
| cg04941278 | 0.19454 | 0.338497838 | 0.79908  | 0.000111 | hypermethylated |
| cg16387141 | 0.20502 | 0.356714595 | 0.799006 | 5.79E-05 | hypermethylated |
| cg25648436 | 0.32266 | 0.561350811 | 0.798888 | 5.19E-05 | hypermethylated |
| cg15736524 | 0.28703 | 0.499342703 | 0.798829 | 0.000138 | hypermethylated |
| cg17442776 | 0.23132 | 0.40236973  | 0.798632 | 1.15E-05 | hypermethylated |
| cg20426959 | 0.22328 | 0.388269189 | 0.798203 | 1.09E-05 | hypermethylated |
| cg10423771 | 0.24891 | 0.432772973 | 0.797986 | 1.52E-05 | hypermethylated |
| cg00703513 | 0.21635 | 0.376126486 | 0.797851 | 2.92E-05 | hypermethylated |
| cg04452311 | 0.22531 | 0.391681081 | 0.797768 | 3.81E-05 | hypermethylated |
| cg06870213 | 0.36439 | 0.633422162 | 0.797684 | 0.000117 | hypermethylated |
| cg20080624 | 0.24274 | 0.421944324 | 0.797641 | 3.57E-05 | hypermethylated |
| cg21948716 | 0.17218 | 0.299242703 | 0.797398 | 4.47E-05 | hypermethylated |
| cg12765028 | 0.24283 | 0.421986486 | 0.79725  | 5.31E-05 | hypermethylated |
| cg15049101 | 0.42251 | 0.734177297 | 0.797143 | 5.19E-05 | hypermethylated |
| cg17054759 | 0.16766 | 0.291324324 | 0.797088 | 0.000178 | hypermethylated |
| cg13574488 | 0.23782 | 0.413192432 | 0.796944 | 7.74E-05 | hypermethylated |
| cg17928883 | 0.25336 | 0.44008973  | 0.796609 | 0.00071  | hypermethylated |
| cg02853616 | 0.26229 | 0.455576216 | 0.79653  | 0.000129 | hypermethylated |
| cg09818081 | 0.18692 | 0.324663243 | 0.796523 | 6.01E-05 | hypermethylated |
| cg19203333 | 0.26058 | 0.452436757 | 0.79599  | 0.000193 | hypermethylated |
| cg21542223 | 0.22581 | 0.392048108 | 0.795921 | 3.67E-05 | hypermethylated |
| cg22486834 | 0.27572 | 0.478648649 | 0.795763 | 0.007667 | hypermethylated |
| cg00011482 | 0.16761 | 0.290895135 | 0.795391 | 3.95E-05 | hypermethylated |
| cg01544851 | 0.21446 | 0.372169189 | 0.79525  | 2.05E-06 | hypermethylated |

|            |         |             |          |          |                 |
|------------|---------|-------------|----------|----------|-----------------|
| cg18583910 | 0.23921 | 0.41504     | 0.794973 | 0.000112 | hypermethylated |
| cg15503722 | 0.28533 | 0.495028108 | 0.794879 | 1.80E-05 | hypermethylated |
| cg20982735 | 0.31038 | 0.538475676 | 0.794846 | 8.52E-05 | hypermethylated |
| cg19143209 | 0.19892 | 0.345007568 | 0.79444  | 0.000229 | hypermethylated |
| cg26295328 | 0.17809 | 0.308820541 | 0.794162 | 8.42E-05 | hypermethylated |
| cg00852924 | 0.26431 | 0.458315676 | 0.794111 | 0.000107 | hypermethylated |
| cg04892836 | 0.18678 | 0.323837838 | 0.793932 | 7.12E-05 | hypermethylated |
| cg05618934 | 0.34197 | 0.592817297 | 0.793718 | 4.86E-06 | hypermethylated |
| cg20160127 | 0.23002 | 0.398727568 | 0.793644 | 2.04E-05 | hypermethylated |
| cg03490331 | 0.23567 | 0.408512973 | 0.793614 | 2.46E-06 | hypermethylated |
| cg04645150 | 0.30935 | 0.536071351 | 0.793185 | 5.45E-05 | hypermethylated |
| cg07637213 | 0.22114 | 0.383184324 | 0.793079 | 2.56E-06 | hypermethylated |
| cg17594256 | 0.33677 | 0.583519459 | 0.793017 | 0.000667 | hypermethylated |
| cg07011913 | 0.21878 | 0.379045946 | 0.792892 | 0.000259 | hypermethylated |
| cg04819775 | 0.20167 | 0.349385946 | 0.792825 | 7.93E-05 | hypermethylated |
| cg02524946 | 0.18862 | 0.326751892 | 0.792713 | 0.000198 | hypermethylated |
| cg06758591 | 0.25231 | 0.437007027 | 0.792459 | 2.45E-05 | hypermethylated |
| cg06672469 | 0.15614 | 0.270380541 | 0.792151 | 0.000229 | hypermethylated |
| cg23489627 | 0.18579 | 0.321712973 | 0.792101 | 0.000866 | hypermethylated |
| cg15452970 | 0.30913 | 0.535223784 | 0.791929 | 2.56E-06 | hypermethylated |
| cg02992546 | 0.26377 | 0.456608649 | 0.791678 | 7.84E-05 | hypermethylated |
| cg03259243 | 0.21156 | 0.366187027 | 0.791514 | 0.000117 | hypermethylated |
| cg03463411 | 0.24752 | 0.428428649 | 0.79151  | 0.000234 | hypermethylated |
| cg01805282 | 0.22337 | 0.386556757 | 0.791245 | 0.00017  | hypermethylated |
| cg08151623 | 0.34354 | 0.594496216 | 0.79119  | 9.05E-05 | hypermethylated |
| cg00748589 | 0.23317 | 0.403482703 | 0.791125 | 8.22E-05 | hypermethylated |
| cg26690075 | 0.2516  | 0.435357838 | 0.79107  | 0.000104 | hypermethylated |
| cg11122944 | 0.2143  | 0.370678919 | 0.790538 | 0.000417 | hypermethylated |
| cg05671386 | 0.21793 | 0.37693027  | 0.790433 | 4.26E-05 | hypermethylated |
| cg00989365 | 0.25737 | 0.445005946 | 0.789981 | 5.12E-05 | hypermethylated |
| cg11322252 | 0.21934 | 0.379101622 | 0.789416 | 1.37E-05 | hypermethylated |
| cg00006081 | 0.22793 | 0.393901081 | 0.789243 | 1.54E-05 | hypermethylated |
| cg00116092 | 0.25954 | 0.448456216 | 0.78901  | 0.000104 | hypermethylated |
| cg00010742 | 0.16866 | 0.291377838 | 0.788773 | 5.93E-05 | hypermethylated |
| cg06055873 | 0.26571 | 0.459029189 | 0.788733 | 2.21E-05 | hypermethylated |
| cg18030587 | 0.18526 | 0.319985405 | 0.788455 | 6.57E-06 | hypermethylated |
| cg09176539 | 0.21573 | 0.372612973 | 0.788451 | 1.18E-05 | hypermethylated |
| cg00219282 | 0.20862 | 0.360327027 | 0.788429 | 7.38E-05 | hypermethylated |
| cg14005211 | 0.2328  | 0.402003243 | 0.788116 | 0.000224 | hypermethylated |
| cg17284168 | 0.41546 | 0.717417297 | 0.788103 | 0.000399 | hypermethylated |
| cg21647257 | 0.21256 | 0.367045946 | 0.788091 | 5.86E-05 | hypermethylated |
| cg09156097 | 0.28864 | 0.498374054 | 0.787958 | 0.000178 | hypermethylated |
| cg00558702 | 0.31186 | 0.538434595 | 0.787873 | 1.99E-06 | hypermethylated |
| cg23856413 | 0.19825 | 0.342248649 | 0.787724 | 7.65E-05 | hypermethylated |
| cg01693350 | 0.33858 | 0.584334595 | 0.787298 | 6.62E-05 | hypermethylated |
| cg14405924 | 0.23185 | 0.400108649 | 0.7872   | 7.20E-07 | hypermethylated |
| cg12884605 | 0.19321 | 0.333399459 | 0.787082 | 0.00094  | hypermethylated |
| cg01139861 | 0.22684 | 0.391378919 | 0.786891 | 0.00078  | hypermethylated |
| cg22283925 | 0.25171 | 0.434236216 | 0.786718 | 1.28E-05 | hypermethylated |
| cg06710927 | 0.19195 | 0.331051351 | 0.786324 | 0.000102 | hypermethylated |
| cg04213384 | 0.40588 | 0.69992     | 0.786137 | 0.001839 | hypermethylated |
| cg24411961 | 0.35514 | 0.612362703 | 0.785999 | 2.04E-05 | hypermethylated |
| cg14410016 | 0.2968  | 0.511710811 | 0.785838 | 1.21E-05 | hypermethylated |
| cg02932314 | 0.22293 | 0.384334054 | 0.78577  | 1.58E-05 | hypermethylated |
| cg12060499 | 0.29922 | 0.515811351 | 0.785637 | 0.000234 | hypermethylated |
| cg13649056 | 0.19015 | 0.327711351 | 0.785288 | 0.000163 | hypermethylated |
| cg16072304 | 0.2716  | 0.468052973 | 0.785188 | 0.000103 | hypermethylated |
| cg02823803 | 0.19362 | 0.333631351 | 0.785027 | 4.94E-05 | hypermethylated |

|            |         |             |          |          |                 |
|------------|---------|-------------|----------|----------|-----------------|
| cg03321133 | 0.20476 | 0.352823243 | 0.785012 | 5.19E-05 | hypermethylated |
| cg27047406 | 0.23655 | 0.407564865 | 0.784885 | 7.47E-05 | hypermethylated |
| cg00905524 | 0.24164 | 0.416296757 | 0.784753 | 4.80E-06 | hypermethylated |
| cg27142059 | 0.23658 | 0.407504324 | 0.784487 | 1.15E-05 | hypermethylated |
| cg08010865 | 0.40448 | 0.696272973 | 0.783585 | 0.000361 | hypermethylated |
| cg12111714 | 0.39096 | 0.672839459 | 0.783241 | 3.32E-05 | hypermethylated |
| cg04961235 | 0.2694  | 0.463568649 | 0.783033 | 3.95E-05 | hypermethylated |
| cg12619940 | 0.19762 | 0.339887568 | 0.782329 | 0.000137 | hypermethylated |
| cg24079051 | 0.2208  | 0.379614595 | 0.781795 | 0.000187 | hypermethylated |
| cg10509254 | 0.22869 | 0.393068649 | 0.781388 | 3.11E-05 | hypermethylated |
| cg08658787 | 0.36566 | 0.628444865 | 0.781283 | 2.02E-05 | hypermethylated |
| cg06934774 | 0.25978 | 0.446426486 | 0.781132 | 3.15E-05 | hypermethylated |
| cg05544500 | 0.23824 | 0.409405946 | 0.781116 | 1.21E-05 | hypermethylated |
| cg07645844 | 0.25258 | 0.434020541 | 0.781023 | 1.15E-05 | hypermethylated |
| cg05316605 | 0.19642 | 0.337499459 | 0.780943 | 0.000262 | hypermethylated |
| cg08809260 | 0.16724 | 0.287226486 | 0.780269 | 0.000107 | hypermethylated |
| cg02327997 | 0.26199 | 0.449926486 | 0.780178 | 2.95E-06 | hypermethylated |
| cg15641789 | 0.16226 | 0.278643784 | 0.780115 | 2.04E-05 | hypermethylated |
| cg26293019 | 0.29619 | 0.50858973  | 0.779979 | 0.000426 | hypermethylated |
| cg25286482 | 0.32147 | 0.551985946 | 0.779947 | 0.000174 | hypermethylated |
| cg14472366 | 0.32553 | 0.558889189 | 0.779772 | 1.28E-05 | hypermethylated |
| cg23289079 | 0.34131 | 0.585974054 | 0.779754 | 4.58E-05 | hypermethylated |
| cg24713204 | 0.26326 | 0.451972973 | 0.779748 | 0.000135 | hypermethylated |
| cg05999049 | 0.27925 | 0.479421622 | 0.779738 | 0.000126 | hypermethylated |
| cg10297473 | 0.22893 | 0.393028649 | 0.779728 | 9.72E-05 | hypermethylated |
| cg08767286 | 0.3024  | 0.519161622 | 0.779726 | 1.80E-05 | hypermethylated |
| cg10635895 | 0.40565 | 0.696404324 | 0.77969  | 0.000161 | hypermethylated |
| cg08206623 | 0.19416 | 0.333309189 | 0.779615 | 0.00035  | hypermethylated |
| cg16546442 | 0.22    | 0.377602703 | 0.779366 | 1.46E-05 | hypermethylated |
| cg18568589 | 0.24677 | 0.42347027  | 0.779094 | 9.49E-05 | hypermethylated |
| cg07109453 | 0.3632  | 0.62318     | 0.778885 | 0.001768 | hypermethylated |
| cg13544333 | 0.17272 | 0.296324865 | 0.778745 | 8.84E-05 | hypermethylated |
| cg17809748 | 0.24666 | 0.42314973  | 0.778644 | 1.99E-05 | hypermethylated |
| cg14351904 | 0.24597 | 0.421951892 | 0.778596 | 3.76E-05 | hypermethylated |
| cg15998779 | 0.26112 | 0.447832432 | 0.778246 | 0.0002   | hypermethylated |
| cg26056703 | 0.15492 | 0.265675135 | 0.77814  | 5.79E-05 | hypermethylated |
| cg20945085 | 0.32697 | 0.560701622 | 0.778075 | 3.49E-05 | hypermethylated |
| cg12883523 | 0.23413 | 0.401328649 | 0.777474 | 5.58E-05 | hypermethylated |
| cg11029716 | 0.234   | 0.401104865 | 0.777471 | 0.00029  | hypermethylated |
| cg24790628 | 0.21884 | 0.374941622 | 0.77679  | 4.30E-06 | hypermethylated |
| cg15949805 | 0.25989 | 0.445238919 | 0.776679 | 0.001074 | hypermethylated |
| cg10942078 | 0.20067 | 0.343742162 | 0.776502 | 0.000102 | hypermethylated |
| cg00624617 | 0.2304  | 0.394603784 | 0.776264 | 2.71E-05 | hypermethylated |
| cg15699085 | 0.30429 | 0.520927027 | 0.775634 | 1.21E-05 | hypermethylated |
| cg25051331 | 0.18492 | 0.316526486 | 0.775425 | 4.53E-05 | hypermethylated |
| cg13858139 | 0.20121 | 0.344379459 | 0.775297 | 7.29E-05 | hypermethylated |
| cg12157673 | 0.30476 | 0.52150973  | 0.775021 | 0.000245 | hypermethylated |
| cg27641532 | 0.33089 | 0.566176757 | 0.774901 | 3.49E-06 | hypermethylated |
| cg01320433 | 0.29541 | 0.505452973 | 0.774858 | 0.000464 | hypermethylated |
| cg15092219 | 0.24915 | 0.426295135 | 0.774838 | 2.57E-05 | hypermethylated |
| cg21929183 | 0.36739 | 0.628598378 | 0.774826 | 0.000219 | hypermethylated |
| cg14546076 | 0.27392 | 0.468665405 | 0.774804 | 4.82E-05 | hypermethylated |
| cg07838483 | 0.43463 | 0.743592973 | 0.774725 | 1.09E-05 | hypermethylated |
| cg24172509 | 0.36331 | 0.621551351 | 0.774673 | 0.000229 | hypermethylated |
| cg14150378 | 0.29231 | 0.500057838 | 0.774596 | 0.000382 | hypermethylated |
| cg12670347 | 0.28172 | 0.481838378 | 0.774287 | 6.15E-05 | hypermethylated |
| cg18948125 | 0.22391 | 0.382880541 | 0.773975 | 4.53E-05 | hypermethylated |
| cg17920479 | 0.20672 | 0.353466486 | 0.773895 | 0.000185 | hypermethylated |



|            |         |             |          |          |                 |
|------------|---------|-------------|----------|----------|-----------------|
| cg14641472 | 0.218   | 0.372658919 | 0.773528 | 0.00044  | hypermethylated |
| cg11666559 | 0.17935 | 0.306561081 | 0.773397 | 0.000303 | hypermethylated |
| cg05073843 | 0.19635 | 0.335595676 | 0.773297 | 3.40E-05 | hypermethylated |
| cg13570972 | 0.22692 | 0.387836216 | 0.773264 | 0.000464 | hypermethylated |
| cg04094811 | 0.24025 | 0.410608108 | 0.773226 | 0.000157 | hypermethylated |
| cg26069745 | 0.26137 | 0.446632973 | 0.772996 | 3.00E-05 | hypermethylated |
| cg12354122 | 0.23147 | 0.395457838 | 0.772699 | 0.000232 | hypermethylated |
| cg20185461 | 0.26434 | 0.451511892 | 0.772369 | 1.94E-05 | hypermethylated |
| cg06894134 | 0.22429 | 0.383029189 | 0.772089 | 7.72E-06 | hypermethylated |
| cg03512426 | 0.23224 | 0.396592973 | 0.772043 | 1.99E-05 | hypermethylated |
| cg06032349 | 0.21628 | 0.369297297 | 0.771882 | 3.90E-06 | hypermethylated |
| cg21349625 | 0.18201 | 0.310760541 | 0.771786 | 6.54E-05 | hypermethylated |
| cg08486875 | 0.24516 | 0.418473514 | 0.771413 | 4.18E-06 | hypermethylated |
| cg09540961 | 0.19353 | 0.33034     | 0.771394 | 0.000268 | hypermethylated |
| cg14663451 | 0.26684 | 0.455430811 | 0.771257 | 5.19E-05 | hypermethylated |
| cg06306198 | 0.2413  | 0.411827027 | 0.771211 | 8.60E-06 | hypermethylated |
| cg13219590 | 0.22065 | 0.376504865 | 0.770909 | 0.001541 | hypermethylated |
| cg20801476 | 0.26965 | 0.460056757 | 0.770724 | 6.57E-06 | hypermethylated |
| cg09656363 | 0.21865 | 0.372843243 | 0.769946 | 1.94E-05 | hypermethylated |
| cg14298200 | 0.30194 | 0.514791892 | 0.769727 | 0.000145 | hypermethylated |
| cg10165801 | 0.24564 | 0.418729189 | 0.769472 | 0.000733 | hypermethylated |
| cg14095959 | 0.29649 | 0.505348108 | 0.769294 | 2.39E-05 | hypermethylated |
| cg08254359 | 0.30458 | 0.519078919 | 0.769133 | 0.000163 | hypermethylated |
| cg27029821 | 0.26893 | 0.4583      | 0.769062 | 5.14E-06 | hypermethylated |
| cg14144305 | 0.22515 | 0.383574054 | 0.768619 | 6.62E-05 | hypermethylated |
| cg00400448 | 0.2985  | 0.508525946 | 0.76859  | 0.001262 | hypermethylated |
| cg12198813 | 0.2914  | 0.496368649 | 0.768411 | 7.52E-06 | hypermethylated |
| cg04503600 | 0.27877 | 0.474689189 | 0.767908 | 6.01E-05 | hypermethylated |
| cg01085125 | 0.23778 | 0.404872973 | 0.767842 | 5.65E-05 | hypermethylated |
| cg03776662 | 0.21101 | 0.359228108 | 0.767589 | 0.000313 | hypermethylated |
| cg21945930 | 0.22299 | 0.379584865 | 0.767443 | 3.00E-05 | hypermethylated |
| cg02380585 | 0.25496 | 0.433974595 | 0.76734  | 8.94E-05 | hypermethylated |
| cg13585776 | 0.24885 | 0.423563243 | 0.767301 | 2.49E-06 | hypermethylated |
| cg12057127 | 0.26739 | 0.455113514 | 0.767281 | 0.002965 | hypermethylated |
| cg12782180 | 0.29978 | 0.510216216 | 0.767205 | 5.72E-05 | hypermethylated |
| cg04562589 | 0.281   | 0.47824     | 0.767165 | 1.75E-05 | hypermethylated |
| cg19508622 | 0.31497 | 0.536028649 | 0.767096 | 0.000435 | hypermethylated |
| cg07805777 | 0.34922 | 0.594231351 | 0.766889 | 3.07E-05 | hypermethylated |
| cg12810084 | 0.22664 | 0.385617297 | 0.766767 | 0.000195 | hypermethylated |
| cg16101739 | 0.23374 | 0.397696757 | 0.766764 | 0.000142 | hypermethylated |
| cg03337093 | 0.22025 | 0.37474     | 0.766748 | 2.21E-05 | hypermethylated |
| cg05116382 | 0.26207 | 0.445857838 | 0.766632 | 4.76E-05 | hypermethylated |
| cg21317965 | 0.25595 | 0.435403243 | 0.76649  | 0.000166 | hypermethylated |
| cg26277754 | 0.33829 | 0.57536973  | 0.766229 | 7.93E-06 | hypermethylated |
| cg13846270 | 0.29104 | 0.494867027 | 0.765823 | 0.000109 | hypermethylated |
| cg08506931 | 0.23181 | 0.394115135 | 0.765674 | 6.15E-05 | hypermethylated |
| cg20950167 | 0.36047 | 0.612787568 | 0.765508 | 3.19E-05 | hypermethylated |
| cg11907797 | 0.27742 | 0.471596757 | 0.765482 | 4.00E-05 | hypermethylated |
| cg22589628 | 0.1598  | 0.271627027 | 0.76536  | 0.000268 | hypermethylated |
| cg24560494 | 0.18114 | 0.307895676 | 0.765336 | 8.94E-05 | hypermethylated |
| cg00508975 | 0.23248 | 0.394992432 | 0.764718 | 0.000142 | hypermethylated |
| cg15504461 | 0.31516 | 0.535444865 | 0.764654 | 6.66E-06 | hypermethylated |
| cg24355907 | 0.21111 | 0.358562162 | 0.764228 | 7.62E-06 | hypermethylated |
| cg04689048 | 0.19239 | 0.326678378 | 0.763837 | 0.001031 | hypermethylated |
| cg05971894 | 0.19387 | 0.329182703 | 0.763799 | 0.000148 | hypermethylated |
| cg22083053 | 0.19057 | 0.323575676 | 0.763782 | 7.65E-05 | hypermethylated |
| cg18334915 | 0.25716 | 0.436631892 | 0.763751 | 5.58E-05 | hypermethylated |
| cg25023596 | 0.34316 | 0.582624865 | 0.763686 | 0.001875 | hypermethylated |

|            |         |             |          |          |                 |
|------------|---------|-------------|----------|----------|-----------------|
| cg19229402 | 0.18798 | 0.319122162 | 0.76353  | 0.000237 | hypermethylated |
| cg21270847 | 0.45247 | 0.767970811 | 0.763229 | 0.001188 | hypermethylated |
| cg07659054 | 0.3414  | 0.579288108 | 0.762818 | 0.00044  | hypermethylated |
| cg00910715 | 0.2173  | 0.368675135 | 0.762662 | 2.79E-06 | hypermethylated |
| cg06380356 | 0.19297 | 0.327316757 | 0.762311 | 4.47E-05 | hypermethylated |
| cg08770761 | 0.21259 | 0.360501622 | 0.761932 | 3.00E-05 | hypermethylated |
| cg01700290 | 0.19756 | 0.334896216 | 0.761423 | 3.95E-05 | hypermethylated |
| cg19519747 | 0.2798  | 0.474254595 | 0.761266 | 8.37E-06 | hypermethylated |
| cg00642359 | 0.2431  | 0.412007027 | 0.761119 | 9.72E-05 | hypermethylated |
| cg22171539 | 0.22068 | 0.373992432 | 0.761053 | 2.78E-05 | hypermethylated |
| cg18419271 | 0.30818 | 0.522255676 | 0.760983 | 0.00049  | hypermethylated |
| cg06495131 | 0.207   | 0.350774595 | 0.760913 | 0.000245 | hypermethylated |
| cg04779860 | 0.21025 | 0.356281622 | 0.760912 | 6.95E-05 | hypermethylated |
| cg01416712 | 0.25668 | 0.434916757 | 0.760768 | 0.000283 | hypermethylated |
| cg06020207 | 0.2415  | 0.409179459 | 0.760711 | 3.00E-05 | hypermethylated |
| cg23361092 | 0.19534 | 0.330905405 | 0.760431 | 2.42E-05 | hypermethylated |
| cg06654537 | 0.21966 | 0.372046486 | 0.760211 | 3.67E-05 | hypermethylated |
| cg13836098 | 0.25406 | 0.430157838 | 0.759697 | 0.001511 | hypermethylated |
| cg10806146 | 0.27663 | 0.46828973  | 0.759444 | 0.001912 | hypermethylated |
| cg25560247 | 0.24225 | 0.410081081 | 0.759413 | 1.62E-05 | hypermethylated |
| cg23767994 | 0.32448 | 0.549195135 | 0.759189 | 1.25E-05 | hypermethylated |
| cg02612397 | 0.29678 | 0.502301081 | 0.759159 | 0.00039  | hypermethylated |
| cg04611437 | 0.24089 | 0.407694054 | 0.759112 | 0.000517 | hypermethylated |
| cg22856324 | 0.29632 | 0.501397297 | 0.758798 | 0.000104 | hypermethylated |
| cg10490742 | 0.22972 | 0.388703243 | 0.758793 | 1.21E-05 | hypermethylated |
| cg14428048 | 0.25197 | 0.426238378 | 0.758409 | 5.65E-05 | hypermethylated |
| cg09442828 | 0.21908 | 0.370529189 | 0.758129 | 0.000163 | hypermethylated |
| cg07170824 | 0.25854 | 0.437123784 | 0.757654 | 0.000245 | hypermethylated |
| cg01289769 | 0.48118 | 0.813458919 | 0.757493 | 3.07E-05 | hypermethylated |
| cg12878812 | 0.24148 | 0.408225405 | 0.757462 | 1.82E-05 | hypermethylated |
| cg10205928 | 0.21794 | 0.368422703 | 0.757431 | 6.15E-05 | hypermethylated |
| cg18689332 | 0.29169 | 0.493070811 | 0.757359 | 0.0003   | hypermethylated |
| cg07015195 | 0.26772 | 0.452534595 | 0.757303 | 0.000189 | hypermethylated |
| cg07240873 | 0.22724 | 0.384031351 | 0.757007 | 8.34E-07 | hypermethylated |
| cg03196097 | 0.2637  | 0.445570811 | 0.756757 | 0.000142 | hypermethylated |
| cg12149299 | 0.31482 | 0.531892432 | 0.756607 | 1.28E-05 | hypermethylated |
| cg13702421 | 0.21929 | 0.370475676 | 0.756539 | 1.84E-05 | hypermethylated |
| cg07150045 | 0.22995 | 0.38841027  | 0.756261 | 0.000797 | hypermethylated |
| cg25372357 | 0.25103 | 0.423968108 | 0.756096 | 0.000501 | hypermethylated |
| cg05457768 | 0.24252 | 0.409564324 | 0.755986 | 9.95E-05 | hypermethylated |
| cg00629427 | 0.22954 | 0.38754     | 0.7556   | 4.26E-05 | hypermethylated |
| cg16076997 | 0.15821 | 0.267096216 | 0.755519 | 4.70E-05 | hypermethylated |
| cg26841967 | 0.22804 | 0.384984865 | 0.755515 | 4.36E-05 | hypermethylated |
| cg03583111 | 0.18881 | 0.318738919 | 0.75544  | 0.000119 | hypermethylated |
| cg03500056 | 0.17592 | 0.296955135 | 0.755325 | 0.001603 | hypermethylated |
| cg15990972 | 0.28774 | 0.48566     | 0.755181 | 5.86E-05 | hypermethylated |
| cg14975429 | 0.23073 | 0.389434595 | 0.755175 | 2.81E-05 | hypermethylated |
| cg20557801 | 0.2244  | 0.378676216 | 0.754892 | 0.000324 | hypermethylated |
| cg06632310 | 0.20933 | 0.353193514 | 0.75468  | 0.000112 | hypermethylated |
| cg22300957 | 0.2251  | 0.379732432 | 0.754417 | 1.99E-05 | hypermethylated |
| cg04470072 | 0.32286 | 0.544626486 | 0.754358 | 0.000102 | hypermethylated |
| cg15852516 | 0.20796 | 0.350789189 | 0.754298 | 2.92E-05 | hypermethylated |
| cg18609078 | 0.32326 | 0.545199459 | 0.754089 | 2.71E-05 | hypermethylated |
| cg07895132 | 0.32565 | 0.549198378 | 0.754005 | 0.000108 | hypermethylated |
| cg22727965 | 0.20157 | 0.339927568 | 0.753946 | 1.89E-05 | hypermethylated |
| cg02803819 | 0.3118  | 0.525803243 | 0.753902 | 0.002318 | hypermethylated |
| cg27366162 | 0.22341 | 0.37674     | 0.753875 | 0.002649 | hypermethylated |
| cg04439218 | 0.27669 | 0.466552973 | 0.75377  | 1.09E-05 | hypermethylated |

|            |         |             |          |          |                 |
|------------|---------|-------------|----------|----------|-----------------|
| cg23034362 | 0.2088  | 0.352041622 | 0.753624 | 0.000152 | hypermethylated |
| cg04255201 | 0.18075 | 0.304674595 | 0.753274 | 0.000185 | hypermethylated |
| cg08175609 | 0.23405 | 0.394485405 | 0.753155 | 0.000251 | hypermethylated |
| cg05171584 | 0.20943 | 0.352972973 | 0.75309  | 1.50E-05 | hypermethylated |
| cg08259413 | 0.21516 | 0.362609189 | 0.753006 | 5.58E-05 | hypermethylated |
| cg14128735 | 0.29493 | 0.497025405 | 0.752947 | 2.32E-05 | hypermethylated |
| cg23709172 | 0.22114 | 0.372562162 | 0.752521 | 5.43E-06 | hypermethylated |
| cg15331781 | 0.17481 | 0.294495135 | 0.752456 | 7.65E-05 | hypermethylated |
| cg05290058 | 0.27895 | 0.469923243 | 0.752419 | 6.62E-05 | hypermethylated |
| cg01257889 | 0.30475 | 0.513291892 | 0.752153 | 0.000132 | hypermethylated |
| cg01922095 | 0.24361 | 0.410284865 | 0.752053 | 0.000123 | hypermethylated |
| cg14176752 | 0.18333 | 0.308696757 | 0.751747 | 0.000287 | hypermethylated |
| cg01889237 | 0.24646 | 0.414911892 | 0.751451 | 1.75E-05 | hypermethylated |
| cg15856829 | 0.24984 | 0.420590811 | 0.751413 | 0.001395 | hypermethylated |
| cg06392753 | 0.40076 | 0.674499459 | 0.751079 | 0.003773 | hypermethylated |
| cg07584066 | 0.29586 | 0.497904865 | 0.750955 | 0.000152 | hypermethylated |
| cg14395444 | 0.27052 | 0.455182162 | 0.750709 | 0.000209 | hypermethylated |
| cg02689863 | 0.24377 | 0.410133514 | 0.750573 | 1.44E-05 | hypermethylated |
| cg05784193 | 0.44717 | 0.752287027 | 0.75046  | 0.000123 | hypermethylated |
| cg17508941 | 0.36053 | 0.606471351 | 0.75032  | 1.94E-05 | hypermethylated |
| cg13779907 | 0.2047  | 0.344302703 | 0.750166 | 4.36E-05 | hypermethylated |
| cg05270938 | 0.23536 | 0.395781081 | 0.749833 | 9.95E-05 | hypermethylated |
| cg05012697 | 0.19579 | 0.329238919 | 0.749828 | 7.38E-05 | hypermethylated |
| cg19521279 | 0.30954 | 0.520507568 | 0.749793 | 0.004248 | hypermethylated |
| cg04456238 | 0.33347 | 0.56068973  | 0.749646 | 5.12E-05 | hypermethylated |
| cg18515031 | 0.33577 | 0.564542162 | 0.749608 | 0.000262 | hypermethylated |
| cg18593317 | 0.31897 | 0.536276757 | 0.749557 | 8.84E-05 | hypermethylated |
| cg06530563 | 0.20103 | 0.337985946 | 0.749552 | 0.001074 | hypermethylated |
| cg05323533 | 0.28153 | 0.473268649 | 0.749371 | 0.000324 | hypermethylated |
| cg26509328 | 0.19911 | 0.33469027  | 0.749261 | 5.86E-05 | hypermethylated |
| cg05926722 | 0.32821 | 0.551684865 | 0.749225 | 1.62E-05 | hypermethylated |
| cg14201424 | 0.31106 | 0.522843243 | 0.749186 | 0.000506 | hypermethylated |
| cg25334928 | 0.20735 | 0.348521081 | 0.749178 | 0.000681 | hypermethylated |
| cg26601317 | 0.25315 | 0.425486486 | 0.749121 | 7.12E-06 | hypermethylated |
| cg17293161 | 0.28096 | 0.472154595 | 0.748895 | 0.00017  | hypermethylated |
| cg22997113 | 0.38694 | 0.650198919 | 0.748771 | 8.60E-06 | hypermethylated |
| cg09744068 | 0.25205 | 0.423519459 | 0.748718 | 7.29E-05 | hypermethylated |
| cg10005230 | 0.21158 | 0.355493514 | 0.74862  | 0.000563 | hypermethylated |
| cg18516557 | 0.37197 | 0.62472     | 0.748023 | 1.33E-05 | hypermethylated |
| cg26618441 | 0.31862 | 0.53506     | 0.747864 | 0.00035  | hypermethylated |
| cg01350680 | 0.22284 | 0.374189189 | 0.74776  | 8.03E-05 | hypermethylated |
| cg18008247 | 0.3283  | 0.551104324 | 0.747311 | 0.000155 | hypermethylated |
| cg03934782 | 0.25562 | 0.429061622 | 0.747184 | 0.000182 | hypermethylated |
| cg06894334 | 0.23676 | 0.397378378 | 0.747088 | 4.36E-05 | hypermethylated |
| cg08979895 | 0.30852 | 0.517818378 | 0.747082 | 4.26E-05 | hypermethylated |
| cg18969232 | 0.26908 | 0.451519459 | 0.746753 | 5.72E-05 | hypermethylated |
| cg21010475 | 0.17569 | 0.294805946 | 0.746734 | 0.000174 | hypermethylated |
| cg09059319 | 0.25817 | 0.43318     | 0.746645 | 1.64E-05 | hypermethylated |
| cg05748163 | 0.27441 | 0.460425405 | 0.746634 | 1.04E-05 | hypermethylated |
| cg24718465 | 0.18422 | 0.309078378 | 0.746543 | 0.000681 | hypermethylated |
| cg03349582 | 0.306   | 0.513368108 | 0.746462 | 0.000296 | hypermethylated |
| cg10475970 | 0.23454 | 0.393474595 | 0.746436 | 1.15E-05 | hypermethylated |
| cg10702770 | 0.29236 | 0.490467568 | 0.746412 | 0.00017  | hypermethylated |
| cg04583232 | 0.2057  | 0.345078378 | 0.746382 | 3.04E-06 | hypermethylated |
| cg06902607 | 0.23688 | 0.397261622 | 0.745933 | 8.04E-06 | hypermethylated |
| cg20459495 | 0.3055  | 0.512301622 | 0.745821 | 0.000145 | hypermethylated |
| cg17781669 | 0.26224 | 0.439752432 | 0.745804 | 7.12E-05 | hypermethylated |
| cg00409684 | 0.23374 | 0.391930811 | 0.745694 | 7.12E-05 | hypermethylated |

|            |         |             |          |          |                 |
|------------|---------|-------------|----------|----------|-----------------|
| cg18409732 | 0.26072 | 0.437143784 | 0.745607 | 0.000157 | hypermethylated |
| cg17566175 | 0.32348 | 0.542346486 | 0.745538 | 6.15E-05 | hypermethylated |
| cg12648074 | 0.28202 | 0.472801622 | 0.745438 | 4.26E-05 | hypermethylated |
| cg02620013 | 0.23463 | 0.393318378 | 0.74531  | 4.26E-05 | hypermethylated |
| cg16632715 | 0.19998 | 0.335212973 | 0.745222 | 9.07E-06 | hypermethylated |
| cg12467933 | 0.19735 | 0.330765405 | 0.745052 | 0.000229 | hypermethylated |
| cg08892899 | 0.21925 | 0.367438919 | 0.744928 | 0.000117 | hypermethylated |
| cg08231493 | 0.28574 | 0.478718378 | 0.744474 | 1.99E-05 | hypermethylated |
| cg20100445 | 0.20992 | 0.351677297 | 0.744413 | 0.000148 | hypermethylated |
| cg00221382 | 0.2497  | 0.418302162 | 0.74435  | 0.000129 | hypermethylated |
| cg16790291 | 0.23313 | 0.390528649 | 0.744294 | 0.000145 | hypermethylated |
| cg04609576 | 0.22695 | 0.380171892 | 0.744277 | 0.000306 | hypermethylated |
| cg02856338 | 0.24757 | 0.414672973 | 0.744138 | 0.000324 | hypermethylated |
| cg15137566 | 0.2108  | 0.352983784 | 0.743727 | 0.000143 | hypermethylated |
| cg08169778 | 0.27542 | 0.461155676 | 0.743621 | 0.000138 | hypermethylated |
| cg15730491 | 0.34185 | 0.572357838 | 0.743554 | 0.001452 | hypermethylated |
| cg16754788 | 0.42984 | 0.719610811 | 0.743417 | 0.000464 | hypermethylated |
| cg26007189 | 0.3065  | 0.513112973 | 0.743389 | 0.000681 | hypermethylated |
| cg01841306 | 0.20414 | 0.341734054 | 0.743315 | 0.00421  | hypermethylated |
| cg07499553 | 0.21915 | 0.366830811 | 0.743196 | 0.00032  | hypermethylated |
| cg07957294 | 0.31855 | 0.533209189 | 0.743182 | 0.000209 | hypermethylated |
| cg22524061 | 0.35744 | 0.598255135 | 0.74306  | 0.000417 | hypermethylated |
| cg03739573 | 0.23837 | 0.398964865 | 0.743059 | 0.000193 | hypermethylated |
| cg01716975 | 0.29649 | 0.496040541 | 0.742475 | 0.00028  | hypermethylated |
| cg04175111 | 0.30362 | 0.507854595 | 0.742149 | 0.000335 | hypermethylated |
| cg05791173 | 0.28336 | 0.473920541 | 0.742009 | 1.87E-05 | hypermethylated |
| cg25687358 | 0.34044 | 0.569370811 | 0.741968 | 0.001    | hypermethylated |
| cg26770907 | 0.33849 | 0.566048108 | 0.741811 | 2.92E-05 | hypermethylated |
| cg14497054 | 0.34465 | 0.576307027 | 0.741706 | 4.93E-06 | hypermethylated |
| cg08654915 | 0.25142 | 0.420407027 | 0.741687 | 1.25E-05 | hypermethylated |
| cg16808373 | 0.25284 | 0.422775135 | 0.741666 | 1.54E-05 | hypermethylated |
| cg26709300 | 0.3128  | 0.523028108 | 0.741648 | 0.000163 | hypermethylated |
| cg22478121 | 0.21452 | 0.358692973 | 0.741637 | 0.000102 | hypermethylated |
| cg27615378 | 0.31277 | 0.522966486 | 0.741616 | 1.77E-06 | hypermethylated |
| cg17177995 | 0.208   | 0.347764324 | 0.741526 | 0.000403 | hypermethylated |
| cg06660395 | 0.24257 | 0.405544865 | 0.74146  | 0.000145 | hypermethylated |
| cg07502389 | 0.22279 | 0.372442162 | 0.741332 | 0.000161 | hypermethylated |
| cg13718539 | 0.25818 | 0.431470811 | 0.740886 | 3.81E-05 | hypermethylated |
| cg02442900 | 0.25898 | 0.432794054 | 0.74084  | 0.00017  | hypermethylated |
| cg00503840 | 0.26635 | 0.445101081 | 0.74081  | 2.23E-06 | hypermethylated |
| cg25580656 | 0.46418 | 0.775546486 | 0.740529 | 0.000772 | hypermethylated |
| cg16961816 | 0.28    | 0.467717838 | 0.740212 | 1.50E-05 | hypermethylated |
| cg01255417 | 0.24806 | 0.414352973 | 0.740171 | 1.84E-05 | hypermethylated |
| cg11260097 | 0.25182 | 0.420589189 | 0.740019 | 9.19E-06 | hypermethylated |
| cg02952984 | 0.38154 | 0.637138378 | 0.739772 | 0.001164 | hypermethylated |
| cg01080998 | 0.19373 | 0.32351027  | 0.739764 | 1.52E-05 | hypermethylated |
| cg04321618 | 0.23815 | 0.397651351 | 0.739634 | 2.15E-05 | hypermethylated |
| cg09010107 | 0.28453 | 0.475010811 | 0.73938  | 0.000324 | hypermethylated |
| cg27346707 | 0.24627 | 0.411111351 | 0.739288 | 0.000245 | hypermethylated |
| cg15748507 | 0.26839 | 0.447988108 | 0.73913  | 8.37E-06 | hypermethylated |
| cg15812753 | 0.25597 | 0.427234054 | 0.739052 | 4.42E-05 | hypermethylated |
| cg12127282 | 0.27903 | 0.465494595 | 0.738344 | 7.29E-05 | hypermethylated |
| cg16523839 | 0.22264 | 0.371415135 | 0.73832  | 0.000395 | hypermethylated |
| cg19935850 | 0.20958 | 0.34960973  | 0.738244 | 0.000165 | hypermethylated |
| cg21215767 | 0.26042 | 0.434278378 | 0.73778  | 0.00035  | hypermethylated |
| cg22284398 | 0.31127 | 0.519010811 | 0.737598 | 3.15E-05 | hypermethylated |
| cg11540692 | 0.20208 | 0.336905405 | 0.737417 | 8.13E-05 | hypermethylated |
| cg11711816 | 0.22074 | 0.367939459 | 0.73712  | 0.000127 | hypermethylated |

|            |         |             |          |          |                 |
|------------|---------|-------------|----------|----------|-----------------|
| cg07706352 | 0.22497 | 0.374979459 | 0.737079 | 5.86E-05 | hypermethylated |
| cg12268637 | 0.26478 | 0.441295676 | 0.736951 | 3.08E-06 | hypermethylated |
| cg09516959 | 0.2038  | 0.339663243 | 0.736951 | 4.94E-05 | hypermethylated |
| cg18133531 | 0.20276 | 0.337919459 | 0.736906 | 1.58E-05 | hypermethylated |
| cg22381068 | 0.30598 | 0.509881081 | 0.736723 | 5.86E-05 | hypermethylated |
| cg06200092 | 0.1995  | 0.332357297 | 0.736346 | 0.000474 | hypermethylated |
| cg04471325 | 0.28461 | 0.474097297 | 0.736197 | 9.27E-05 | hypermethylated |
| cg18049571 | 0.26167 | 0.435844865 | 0.736066 | 5.58E-05 | hypermethylated |
| cg07077013 | 0.22538 | 0.375378378 | 0.735986 | 6.95E-05 | hypermethylated |
| cg20624923 | 0.26939 | 0.448623243 | 0.735808 | 3.07E-05 | hypermethylated |
| cg14094347 | 0.3494  | 0.581856216 | 0.735783 | 0.000681 | hypermethylated |
| cg05272349 | 0.24239 | 0.403365946 | 0.734759 | 3.44E-05 | hypermethylated |
| cg21199093 | 0.36739 | 0.611315135 | 0.734604 | 0.000132 | hypermethylated |
| cg13245152 | 0.30294 | 0.504025946 | 0.734466 | 4.82E-05 | hypermethylated |
| cg08830818 | 0.16091 | 0.267718919 | 0.734465 | 4.20E-05 | hypermethylated |
| cg10759602 | 0.14995 | 0.249475676 | 0.734418 | 0.000399 | hypermethylated |
| cg22119466 | 0.211   | 0.351037838 | 0.734384 | 0.002965 | hypermethylated |
| cg07057579 | 0.26672 | 0.443691892 | 0.734232 | 1.56E-05 | hypermethylated |
| cg01474257 | 0.22901 | 0.380924865 | 0.734096 | 1.66E-05 | hypermethylated |
| cg08980715 | 0.2159  | 0.359115135 | 0.734083 | 2.74E-05 | hypermethylated |
| cg10602757 | 0.2394  | 0.398140541 | 0.733855 | 0.000346 | hypermethylated |
| cg14823851 | 0.25858 | 0.429977838 | 0.733652 | 2.78E-05 | hypermethylated |
| cg21830368 | 0.41507 | 0.690124865 | 0.733503 | 0.00097  | hypermethylated |
| cg18064824 | 0.2407  | 0.400174595 | 0.733393 | 9.72E-05 | hypermethylated |
| cg22379472 | 0.37304 | 0.62017027  | 0.733334 | 0.008783 | hypermethylated |
| cg26638505 | 0.28754 | 0.477963784 | 0.733139 | 5.31E-05 | hypermethylated |
| cg08171351 | 0.25524 | 0.424142703 | 0.732695 | 7.52E-06 | hypermethylated |
| cg19570924 | 0.43    | 0.714394595 | 0.732385 | 0.000204 | hypermethylated |
| cg23415434 | 0.43969 | 0.730394054 | 0.732188 | 3.67E-05 | hypermethylated |
| cg08067346 | 0.36712 | 0.609814054 | 0.732118 | 0.000875 | hypermethylated |
| cg20028827 | 0.30118 | 0.500278919 | 0.732107 | 2.27E-05 | hypermethylated |
| cg07861603 | 0.46067 | 0.765097838 | 0.731911 | 7.12E-06 | hypermethylated |
| cg09601175 | 0.2297  | 0.381479459 | 0.731855 | 4.70E-05 | hypermethylated |
| cg01024141 | 0.15008 | 0.249177838 | 0.731444 | 0.000229 | hypermethylated |
| cg07799386 | 0.28005 | 0.464928649 | 0.731325 | 2.92E-05 | hypermethylated |
| cg13223107 | 0.18545 | 0.307874595 | 0.731313 | 7.12E-05 | hypermethylated |
| cg24035107 | 0.3939  | 0.653930811 | 0.731309 | 0.003671 | hypermethylated |
| cg08616061 | 0.27671 | 0.4593      | 0.731062 | 6.22E-06 | hypermethylated |
| cg13654588 | 0.27409 | 0.454932973 | 0.731004 | 1.39E-05 | hypermethylated |
| cg26053840 | 0.45845 | 0.760801622 | 0.730756 | 1.31E-05 | hypermethylated |
| cg05962092 | 0.34601 | 0.574184865 | 0.730702 | 0.000382 | hypermethylated |
| cg15399466 | 0.28001 | 0.464602162 | 0.730518 | 0.000152 | hypermethylated |
| cg27550060 | 0.20432 | 0.338943243 | 0.730213 | 0.000575 | hypermethylated |
| cg27111250 | 0.31216 | 0.517742162 | 0.729948 | 0.002066 | hypermethylated |
| cg04130163 | 0.19169 | 0.31792     | 0.729889 | 0.000772 | hypermethylated |
| cg22852065 | 0.30031 | 0.497994595 | 0.729678 | 1.84E-05 | hypermethylated |
| cg11436222 | 0.27309 | 0.452812432 | 0.729537 | 1.18E-05 | hypermethylated |
| cg11647681 | 0.26026 | 0.431377297 | 0.728997 | 0.000115 | hypermethylated |
| cg25718766 | 0.25728 | 0.426421081 | 0.728939 | 0.000229 | hypermethylated |
| cg20439889 | 0.24611 | 0.407868108 | 0.728799 | 7.84E-05 | hypermethylated |
| cg21960680 | 0.18259 | 0.302576757 | 0.728693 | 1.35E-05 | hypermethylated |
| cg17806623 | 0.24222 | 0.401377838 | 0.728643 | 0.000219 | hypermethylated |
| cg23051392 | 0.41725 | 0.691397838 | 0.728604 | 0.002502 | hypermethylated |
| cg13773083 | 0.22497 | 0.372736757 | 0.728424 | 7.93E-06 | hypermethylated |
| cg13059459 | 0.28908 | 0.478955676 | 0.728423 | 2.95E-06 | hypermethylated |
| cg04654288 | 0.22192 | 0.367672432 | 0.728381 | 5.58E-06 | hypermethylated |
| cg05496514 | 0.25531 | 0.422957297 | 0.728262 | 1.54E-05 | hypermethylated |
| cg10791926 | 0.19348 | 0.320454054 | 0.727933 | 0.000335 | hypermethylated |

|            |         |             |          |          |                 |
|------------|---------|-------------|----------|----------|-----------------|
| cg15852312 | 0.24314 | 0.402612973 | 0.727606 | 0.000154 | hypermethylated |
| cg00459845 | 0.31811 | 0.526514054 | 0.726946 | 4.31E-05 | hypermethylated |
| cg06533314 | 0.23274 | 0.385179459 | 0.726812 | 6.38E-05 | hypermethylated |
| cg06093355 | 0.3242  | 0.536516216 | 0.726738 | 0.001734 | hypermethylated |
| cg10823473 | 0.25787 | 0.426735135 | 0.726697 | 2.64E-05 | hypermethylated |
| cg08750534 | 0.29423 | 0.486903784 | 0.726692 | 0.001288 | hypermethylated |
| cg00097357 | 0.24914 | 0.412196757 | 0.726376 | 2.02E-05 | hypermethylated |
| cg14832317 | 0.2286  | 0.378203784 | 0.726338 | 3.04E-06 | hypermethylated |
| cg04680436 | 0.41055 | 0.679215135 | 0.726311 | 0.001587 | hypermethylated |
| cg19624318 | 0.25183 | 0.416595676 | 0.726198 | 3.23E-05 | hypermethylated |
| cg01817364 | 0.39216 | 0.648687027 | 0.72608  | 0.001481 | hypermethylated |
| cg12865888 | 0.39064 | 0.646148108 | 0.726025 | 0.003808 | hypermethylated |
| cg27517681 | 0.30826 | 0.509854595 | 0.725938 | 1.62E-05 | hypermethylated |
| cg23245942 | 0.26198 | 0.433271892 | 0.725816 | 0.008783 | hypermethylated |
| cg03016906 | 0.18644 | 0.308274054 | 0.725502 | 2.51E-05 | hypermethylated |
| cg15508379 | 0.23863 | 0.394465405 | 0.725123 | 2.27E-05 | hypermethylated |
| cg10901368 | 0.22657 | 0.374528108 | 0.725117 | 8.83E-06 | hypermethylated |
| cg16020346 | 0.34729 | 0.573884865 | 0.72462  | 0.000124 | hypermethylated |
| cg06746009 | 0.37501 | 0.61965027  | 0.724525 | 8.42E-05 | hypermethylated |
| cg03312958 | 0.26841 | 0.44343027  | 0.724269 | 4.18E-06 | hypermethylated |
| cg02584377 | 0.43433 | 0.717504865 | 0.724197 | 0.000229 | hypermethylated |
| cg24908603 | 0.30727 | 0.507598919 | 0.724182 | 0.000875 | hypermethylated |
| cg05767159 | 0.25751 | 0.425329189 | 0.723951 | 9.27E-05 | hypermethylated |
| cg05256269 | 0.21627 | 0.357064324 | 0.72335  | 6.38E-05 | hypermethylated |
| cg08726801 | 0.23472 | 0.387487568 | 0.723209 | 0.000485 | hypermethylated |
| cg02642822 | 0.26652 | 0.439941081 | 0.723067 | 0.000382 | hypermethylated |
| cg17107893 | 0.25534 | 0.421386486 | 0.722724 | 6.08E-05 | hypermethylated |
| cg03388789 | 0.25274 | 0.417072973 | 0.722646 | 6.15E-05 | hypermethylated |
| cg07820868 | 0.28937 | 0.47750973  | 0.722615 | 0.000127 | hypermethylated |
| cg06528559 | 0.31371 | 0.517592973 | 0.722387 | 0.000193 | hypermethylated |
| cg13907146 | 0.23155 | 0.382028649 | 0.722357 | 0.000454 | hypermethylated |
| cg18395355 | 0.19855 | 0.327543784 | 0.722185 | 1.94E-05 | hypermethylated |
| cg15925365 | 0.31463 | 0.519008649 | 0.722102 | 0.00513  | hypermethylated |
| cg22958047 | 0.26397 | 0.4354      | 0.721967 | 1.73E-05 | hypermethylated |
| cg03213289 | 0.23926 | 0.39464     | 0.721958 | 0.000726 | hypermethylated |
| cg11836372 | 0.4727  | 0.779668649 | 0.721936 | 0.000115 | hypermethylated |
| cg22347212 | 0.22555 | 0.371856216 | 0.721298 | 4.94E-05 | hypermethylated |
| cg10742917 | 0.32079 | 0.528785405 | 0.721053 | 5.19E-05 | hypermethylated |
| cg17463083 | 0.45459 | 0.749217838 | 0.720819 | 9.82E-06 | hypermethylated |
| cg06116236 | 0.26708 | 0.44016973  | 0.720788 | 0.001063 | hypermethylated |
| cg15706250 | 0.27183 | 0.447879459 | 0.720406 | 1.82E-05 | hypermethylated |
| cg12504882 | 0.23499 | 0.387159459 | 0.720329 | 0.000148 | hypermethylated |
| cg01089249 | 0.24501 | 0.403601081 | 0.720089 | 2.54E-05 | hypermethylated |
| cg20981451 | 0.26164 | 0.430976757 | 0.720027 | 0.0003   | hypermethylated |
| cg09641127 | 0.50882 | 0.838018919 | 0.719827 | 0.000189 | hypermethylated |
| cg05735782 | 0.26738 | 0.440351892 | 0.719765 | 2.85E-05 | hypermethylated |
| cg17650274 | 0.24443 | 0.402522703 | 0.719649 | 0.000176 | hypermethylated |
| cg04503968 | 0.25066 | 0.412715135 | 0.719415 | 0.000563 | hypermethylated |
| cg07640800 | 0.34283 | 0.564384865 | 0.719186 | 0.000108 | hypermethylated |
| cg10779492 | 0.25615 | 0.421686486 | 0.719182 | 0.000195 | hypermethylated |
| cg08663552 | 0.33779 | 0.556063784 | 0.719124 | 7.52E-06 | hypermethylated |
| cg18311537 | 0.19892 | 0.32744973  | 0.719085 | 0.000155 | hypermethylated |
| cg03760589 | 0.28176 | 0.463681622 | 0.718668 | 9.49E-05 | hypermethylated |
| cg21733531 | 0.33146 | 0.545367027 | 0.718393 | 4.47E-05 | hypermethylated |
| cg14267754 | 0.45408 | 0.747074595 | 0.718306 | 0.004096 | hypermethylated |
| cg20637609 | 0.28142 | 0.462817838 | 0.71772  | 6.31E-05 | hypermethylated |
| cg21657577 | 0.23949 | 0.393804865 | 0.717516 | 3.23E-05 | hypermethylated |
| cg25008263 | 0.29502 | 0.485094054 | 0.717452 | 2.15E-05 | hypermethylated |

|            |         |             |          |          |                 |
|------------|---------|-------------|----------|----------|-----------------|
| cg05872614 | 0.2118  | 0.34824973  | 0.71742  | 9.05E-05 | hypermethylated |
| cg05227215 | 0.37236 | 0.612238378 | 0.717395 | 0.003316 | hypermethylated |
| cg22234080 | 0.22741 | 0.373898378 | 0.717351 | 1.94E-05 | hypermethylated |
| cg01016191 | 0.31643 | 0.520234054 | 0.717274 | 0.001541 | hypermethylated |
| cg27090062 | 0.29181 | 0.479563784 | 0.716693 | 6.95E-05 | hypermethylated |
| cg14197071 | 0.3672  | 0.603429189 | 0.716618 | 0.00064  | hypermethylated |
| cg21092808 | 0.23417 | 0.384784324 | 0.716494 | 5.51E-05 | hypermethylated |
| cg27642784 | 0.41893 | 0.688302162 | 0.716333 | 6.39E-06 | hypermethylated |
| cg25304107 | 0.22688 | 0.372657838 | 0.715922 | 0.000234 | hypermethylated |
| cg24375626 | 0.40456 | 0.664448108 | 0.715803 | 0.00097  | hypermethylated |
| cg20636352 | 0.28588 | 0.469451892 | 0.715568 | 0.001052 | hypermethylated |
| cg05717794 | 0.2394  | 0.39310973  | 0.715509 | 0.001409 | hypermethylated |
| cg06402675 | 0.17715 | 0.290836757 | 0.715238 | 8.22E-05 | hypermethylated |
| cg00278547 | 0.30954 | 0.508182703 | 0.715221 | 2.27E-05 | hypermethylated |
| cg14770827 | 0.25374 | 0.416565405 | 0.715192 | 1.71E-05 | hypermethylated |
| cg02741440 | 0.29713 | 0.487602162 | 0.71461  | 0.00044  | hypermethylated |
| cg26010218 | 0.3636  | 0.596618378 | 0.714456 | 0.004776 | hypermethylated |
| cg00585714 | 0.23369 | 0.383422703 | 0.71434  | 1.50E-05 | hypermethylated |
| cg27521476 | 0.22369 | 0.366876757 | 0.713795 | 4.82E-05 | hypermethylated |
| cg09906145 | 0.21962 | 0.360155135 | 0.713609 | 0.001031 | hypermethylated |
| cg02305723 | 0.38251 | 0.627172432 | 0.713365 | 7.84E-05 | hypermethylated |
| cg20807254 | 0.42059 | 0.689597838 | 0.713341 | 0.000386 | hypermethylated |
| cg21865845 | 0.22472 | 0.368447027 | 0.713329 | 0.000361 | hypermethylated |
| cg25603636 | 0.25171 | 0.412624324 | 0.713066 | 2.71E-05 | hypermethylated |
| cg17838420 | 0.27974 | 0.458528108 | 0.712924 | 2.16E-06 | hypermethylated |
| cg08607018 | 0.32469 | 0.532196757 | 0.712897 | 0.00035  | hypermethylated |
| cg13928782 | 0.27931 | 0.457779459 | 0.712786 | 4.05E-05 | hypermethylated |
| cg16225703 | 0.36907 | 0.604680541 | 0.712279 | 0.000115 | hypermethylated |
| cg01998213 | 0.38205 | 0.625799459 | 0.711939 | 0.000209 | hypermethylated |
| cg18552939 | 0.25328 | 0.414861081 | 0.711895 | 0.000805 | hypermethylated |
| cg11429969 | 0.2176  | 0.356405946 | 0.711843 | 1.99E-05 | hypermethylated |
| cg03940098 | 0.27793 | 0.455216757 | 0.711832 | 3.40E-05 | hypermethylated |
| cg10824107 | 0.29629 | 0.485136216 | 0.71138  | 1.12E-06 | hypermethylated |
| cg06615940 | 0.25553 | 0.418382162 | 0.711329 | 2.74E-05 | hypermethylated |
| cg03772567 | 0.27734 | 0.45408973  | 0.711322 | 0.002574 | hypermethylated |
| cg18336674 | 0.31464 | 0.515119459 | 0.711205 | 5.65E-06 | hypermethylated |
| cg25516803 | 0.23784 | 0.389367568 | 0.711141 | 0.000202 | hypermethylated |
| cg24169822 | 0.26534 | 0.434284324 | 0.710798 | 3.81E-05 | hypermethylated |
| cg06070263 | 0.194   | 0.317444865 | 0.710449 | 3.81E-05 | hypermethylated |
| cg26777456 | 0.30105 | 0.492585405 | 0.710371 | 3.71E-05 | hypermethylated |
| cg11661914 | 0.32441 | 0.530464324 | 0.709437 | 0.002147 | hypermethylated |
| cg02051771 | 0.32655 | 0.533876757 | 0.709203 | 0.00012  | hypermethylated |
| cg23536681 | 0.19815 | 0.323938378 | 0.709126 | 1.50E-05 | hypermethylated |
| cg10683929 | 0.22659 | 0.370395676 | 0.708983 | 0.000102 | hypermethylated |
| cg16584393 | 0.30486 | 0.49825027  | 0.708724 | 0.000163 | hypermethylated |
| cg20959460 | 0.25516 | 0.416921081 | 0.708372 | 0.000119 | hypermethylated |
| cg18566177 | 0.49249 | 0.804624324 | 0.708221 | 0.000262 | hypermethylated |
| cg26164879 | 0.23423 | 0.382673514 | 0.708188 | 0.000262 | hypermethylated |
| cg12707135 | 0.24955 | 0.407694595 | 0.70816  | 0.000102 | hypermethylated |
| cg10710468 | 0.1858  | 0.303528108 | 0.70808  | 0.000287 | hypermethylated |
| cg25819441 | 0.21719 | 0.354724865 | 0.707743 | 0.00024  | hypermethylated |
| cg04027548 | 0.35689 | 0.582857838 | 0.707665 | 9.07E-06 | hypermethylated |
| cg08732526 | 0.28768 | 0.469687027 | 0.707235 | 9.82E-06 | hypermethylated |
| cg02994956 | 0.26991 | 0.440541622 | 0.7068   | 2.32E-05 | hypermethylated |
| cg07953201 | 0.31179 | 0.508870811 | 0.706725 | 0.000399 | hypermethylated |
| cg01287000 | 0.35938 | 0.586524324 | 0.706681 | 1.68E-05 | hypermethylated |
| cg09357276 | 0.2576  | 0.420331351 | 0.706394 | 3.95E-05 | hypermethylated |
| cg01024458 | 0.48463 | 0.790773514 | 0.706381 | 0.00035  | hypermethylated |

|            |         |             |          |          |                 |
|------------|---------|-------------|----------|----------|-----------------|
| cg04297067 | 0.29827 | 0.486678919 | 0.706351 | 5.19E-05 | hypermethylated |
| cg01691827 | 0.32304 | 0.527083243 | 0.706318 | 2.15E-05 | hypermethylated |
| cg07657465 | 0.36217 | 0.590787027 | 0.705971 | 4.73E-06 | hypermethylated |
| cg06571387 | 0.26556 | 0.433178378 | 0.705923 | 1.21E-05 | hypermethylated |
| cg02487331 | 0.28389 | 0.463024324 | 0.705756 | 0.000626 | hypermethylated |
| cg20939084 | 0.25236 | 0.411582703 | 0.705699 | 7.65E-05 | hypermethylated |
| cg14092276 | 0.32525 | 0.53045027  | 0.705668 | 0.00071  | hypermethylated |
| cg06275853 | 0.2712  | 0.442241081 | 0.705476 | 9.49E-05 | hypermethylated |
| cg19184415 | 0.21125 | 0.344437838 | 0.705292 | 1.14E-05 | hypermethylated |
| cg05628616 | 0.27521 | 0.448697297 | 0.70521  | 0.000575 | hypermethylated |
| cg12982322 | 0.31928 | 0.520306486 | 0.70454  | 5.73E-06 | hypermethylated |
| cg23424407 | 0.30204 | 0.492152432 | 0.704366 | 0.000528 | hypermethylated |
| cg00182727 | 0.1905  | 0.310385405 | 0.70427  | 5.72E-05 | hypermethylated |
| cg03744763 | 0.30653 | 0.499434595 | 0.704267 | 8.03E-05 | hypermethylated |
| cg02119134 | 0.23324 | 0.379927568 | 0.703909 | 3.59E-06 | hypermethylated |
| cg01122241 | 0.23139 | 0.376790811 | 0.703437 | 6.62E-05 | hypermethylated |
| cg02564291 | 0.2709  | 0.441069189 | 0.703245 | 0.000653 | hypermethylated |
| cg15951870 | 0.27734 | 0.451484324 | 0.70302  | 0.0002   | hypermethylated |
| cg16620392 | 0.26705 | 0.434583784 | 0.702524 | 6.38E-05 | hypermethylated |
| cg20273670 | 0.27234 | 0.443128108 | 0.702315 | 0.002363 | hypermethylated |
| cg26034341 | 0.47975 | 0.78040973  | 0.701949 | 0.00024  | hypermethylated |
| cg20634266 | 0.29911 | 0.486489189 | 0.701732 | 4.60E-06 | hypermethylated |
| cg12542255 | 0.35828 | 0.582626486 | 0.701484 | 0.00017  | hypermethylated |
| cg25959472 | 0.33475 | 0.544245946 | 0.701175 | 0.00097  | hypermethylated |
| cg19674091 | 0.50115 | 0.814781622 | 0.701171 | 3.95E-05 | hypermethylated |
| cg23100720 | 0.22061 | 0.35862     | 0.700958 | 0.002318 | hypermethylated |
| cg07892422 | 0.23843 | 0.387558378 | 0.700848 | 6.62E-05 | hypermethylated |
| cg23766254 | 0.25937 | 0.42156     | 0.700726 | 0.000358 | hypermethylated |
| cg16627346 | 0.36748 | 0.597198378 | 0.700545 | 8.52E-05 | hypermethylated |
| cg05022105 | 0.26673 | 0.433438919 | 0.700449 | 0.00028  | hypermethylated |
| cg11385338 | 0.3971  | 0.645277297 | 0.700417 | 0.000115 | hypermethylated |
| cg23994112 | 0.35942 | 0.583901622 | 0.700055 | 0.004365 | hypermethylated |
| cg00109703 | 0.20192 | 0.328026486 | 0.700028 | 0.00031  | hypermethylated |
| cg04201253 | 0.18818 | 0.30565027  | 0.699769 | 0.000176 | hypermethylated |
| cg26962778 | 0.23849 | 0.387301081 | 0.699527 | 0.000417 | hypermethylated |
| cg10571104 | 0.26283 | 0.426790811 | 0.699399 | 0.001288 | hypermethylated |
| cg17868307 | 0.49985 | 0.811627568 | 0.699323 | 9.72E-05 | hypermethylated |
| cg23933241 | 0.31378 | 0.509442703 | 0.699166 | 0.00054  | hypermethylated |
| cg14826456 | 0.25076 | 0.407124324 | 0.699162 | 6.46E-05 | hypermethylated |
| cg19535672 | 0.20111 | 0.326482703 | 0.699022 | 8.73E-05 | hypermethylated |
| cg03631455 | 0.39272 | 0.637507568 | 0.698941 | 0.000148 | hypermethylated |
| cg09270346 | 0.26495 | 0.430024324 | 0.698698 | 4.94E-05 | hypermethylated |
| cg23933044 | 0.27542 | 0.447008649 | 0.698669 | 0.001176 | hypermethylated |
| cg20247911 | 0.32794 | 0.532246486 | 0.698663 | 0.000528 | hypermethylated |
| cg18483289 | 0.21947 | 0.356184865 | 0.698602 | 6.57E-06 | hypermethylated |
| cg02428056 | 0.20843 | 0.338258919 | 0.698565 | 8.42E-05 | hypermethylated |
| cg18268547 | 0.35902 | 0.582628108 | 0.698511 | 6.22E-06 | hypermethylated |
| cg16990168 | 0.31669 | 0.513771892 | 0.698057 | 5.19E-05 | hypermethylated |
| cg13360823 | 0.26353 | 0.427457838 | 0.697815 | 0.000262 | hypermethylated |
| cg09548780 | 0.2525  | 0.409563243 | 0.697803 | 0.00054  | hypermethylated |
| cg13435718 | 0.24403 | 0.395747027 | 0.69752  | 0.000104 | hypermethylated |
| cg01816425 | 0.22959 | 0.372315135 | 0.697464 | 5.19E-05 | hypermethylated |
| cg00014998 | 0.36261 | 0.588003784 | 0.697407 | 0.000274 | hypermethylated |
| cg00196407 | 0.22015 | 0.356990811 | 0.6974   | 0.001395 | hypermethylated |
| cg21237591 | 0.2813  | 0.456077297 | 0.697169 | 7.47E-05 | hypermethylated |
| cg04692403 | 0.21593 | 0.350052973 | 0.69701  | 1.12E-05 | hypermethylated |
| cg12972233 | 0.25477 | 0.412948108 | 0.696765 | 7.93E-06 | hypermethylated |
| cg14822490 | 0.2996  | 0.485517297 | 0.696485 | 9.72E-05 | hypermethylated |



|            |         |             |          |          |                 |
|------------|---------|-------------|----------|----------|-----------------|
| cg01964852 | 0.26448 | 0.428511351 | 0.696175 | 0.003378 | hypermethylated |
| cg07937271 | 0.31409 | 0.508828649 | 0.696002 | 1.21E-05 | hypermethylated |
| cg12608145 | 0.23675 | 0.383529189 | 0.695972 | 0.000545 | hypermethylated |
| cg05574357 | 0.33687 | 0.545682703 | 0.69587  | 9.27E-05 | hypermethylated |
| cg09887220 | 0.32295 | 0.523085405 | 0.695736 | 9.82E-06 | hypermethylated |
| cg24446586 | 0.28936 | 0.468626486 | 0.695573 | 0.000296 | hypermethylated |
| cg17955729 | 0.30214 | 0.48930973  | 0.695531 | 1.44E-05 | hypermethylated |
| cg18892212 | 0.29588 | 0.479122703 | 0.695383 | 0.000563 | hypermethylated |
| cg00513205 | 0.27746 | 0.449223784 | 0.695155 | 4.76E-05 | hypermethylated |
| cg05650810 | 0.21771 | 0.352447568 | 0.695001 | 0.000145 | hypermethylated |
| cg19594666 | 0.31279 | 0.506191351 | 0.694488 | 0.000245 | hypermethylated |
| cg13451356 | 0.2714  | 0.439139459 | 0.694258 | 0.003843 | hypermethylated |
| cg10901633 | 0.3707  | 0.599795135 | 0.694218 | 0.000163 | hypermethylated |
| cg20906291 | 0.35878 | 0.580375676 | 0.693888 | 2.29E-06 | hypermethylated |
| cg10743390 | 0.34166 | 0.552663243 | 0.693839 | 9.07E-06 | hypermethylated |
| cg07191594 | 0.21539 | 0.348403784 | 0.693809 | 0.000137 | hypermethylated |
| cg01830023 | 0.25325 | 0.409579459 | 0.693581 | 6.75E-06 | hypermethylated |
| cg24006721 | 0.23178 | 0.374803243 | 0.693377 | 0.010211 | hypermethylated |
| cg03182688 | 0.25166 | 0.406898378 | 0.693193 | 0.000358 | hypermethylated |
| cg01688688 | 0.26759 | 0.432651351 | 0.693181 | 4.05E-05 | hypermethylated |
| cg10537450 | 0.31352 | 0.506885405 | 0.693102 | 0.000104 | hypermethylated |
| cg12279419 | 0.26166 | 0.42300973  | 0.692997 | 5.28E-06 | hypermethylated |
| cg02200717 | 0.37786 | 0.610787027 | 0.692818 | 0.00028  | hypermethylated |
| cg22518433 | 0.52426 | 0.847396216 | 0.692754 | 4.05E-05 | hypermethylated |
| cg05196366 | 0.22984 | 0.371440541 | 0.692501 | 0.000551 | hypermethylated |
| cg26789064 | 0.35145 | 0.567955135 | 0.692458 | 0.001096 | hypermethylated |
| cg03726817 | 0.34068 | 0.550510811 | 0.692354 | 0.000245 | hypermethylated |
| cg02765731 | 0.37774 | 0.61028     | 0.692078 | 0.001751 | hypermethylated |
| cg19025113 | 0.32533 | 0.525561081 | 0.691955 | 0.000327 | hypermethylated |
| cg19701087 | 0.31185 | 0.503712432 | 0.691748 | 0.004059 | hypermethylated |
| cg08317694 | 0.41171 | 0.664905405 | 0.691521 | 5.51E-05 | hypermethylated |
| cg09841842 | 0.34719 | 0.560518378 | 0.691036 | 0.000101 | hypermethylated |
| cg07214164 | 0.27536 | 0.44440973  | 0.690571 | 9.07E-06 | hypermethylated |
| cg25817244 | 0.2512  | 0.40539027  | 0.690475 | 0.000464 | hypermethylated |
| cg07791011 | 0.32454 | 0.523740541 | 0.690456 | 9.27E-05 | hypermethylated |
| cg17818471 | 0.25393 | 0.409747027 | 0.690303 | 7.29E-05 | hypermethylated |
| cg00059246 | 0.21824 | 0.352118378 | 0.690145 | 0.000135 | hypermethylated |
| cg17104824 | 0.36281 | 0.585323243 | 0.690019 | 5.86E-05 | hypermethylated |
| cg20831708 | 0.28457 | 0.459093514 | 0.690004 | 0.00099  | hypermethylated |
| cg02148562 | 0.4588  | 0.740103784 | 0.689862 | 5.72E-05 | hypermethylated |
| cg25586361 | 0.26283 | 0.423905405 | 0.689612 | 0.000152 | hypermethylated |
| cg09435415 | 0.25974 | 0.418883243 | 0.68948  | 0.000111 | hypermethylated |
| cg17214023 | 0.31174 | 0.50270973  | 0.689382 | 2.21E-05 | hypermethylated |
| cg20974609 | 0.33053 | 0.532959459 | 0.689245 | 0.004059 | hypermethylated |
| cg21304158 | 0.29248 | 0.471598378 | 0.689221 | 0.00012  | hypermethylated |
| cg21412973 | 0.24185 | 0.389951351 | 0.689182 | 0.000101 | hypermethylated |
| cg07471614 | 0.3461  | 0.557931892 | 0.6889   | 0.000464 | hypermethylated |
| cg20588069 | 0.31155 | 0.502210811 | 0.688829 | 0.000182 | hypermethylated |
| cg09151754 | 0.27444 | 0.44236973  | 0.688762 | 2.51E-05 | hypermethylated |
| cg20176142 | 0.29319 | 0.472588649 | 0.688749 | 0.004776 | hypermethylated |
| cg16752876 | 0.36707 | 0.591637838 | 0.688659 | 5.86E-05 | hypermethylated |
| cg23853507 | 0.31323 | 0.504851351 | 0.688636 | 6.15E-05 | hypermethylated |
| cg08424749 | 0.26515 | 0.427313514 | 0.688486 | 2.10E-05 | hypermethylated |
| cg12924956 | 0.30199 | 0.486645946 | 0.688372 | 0.000653 | hypermethylated |
| cg23865240 | 0.39715 | 0.639958378 | 0.688294 | 0.000417 | hypermethylated |
| cg25012961 | 0.43022 | 0.693218378 | 0.688235 | 0.000749 | hypermethylated |
| cg00145253 | 0.27047 | 0.435778919 | 0.688128 | 9.31E-06 | hypermethylated |
| cg23906261 | 0.23077 | 0.371751892 | 0.687884 | 0.000822 | hypermethylated |

|            |         |             |          |          |                 |
|------------|---------|-------------|----------|----------|-----------------|
| cg11173579 | 0.50646 | 0.81555027  | 0.687325 | 0.002599 | hypermethylated |
| cg18849102 | 0.27743 | 0.446578378 | 0.68679  | 9.44E-06 | hypermethylated |
| cg13891220 | 0.29997 | 0.482831351 | 0.686701 | 8.83E-06 | hypermethylated |
| cg14128641 | 0.23421 | 0.376944324 | 0.686549 | 6.15E-05 | hypermethylated |
| cg04098339 | 0.22636 | 0.364275135 | 0.686409 | 0.000474 | hypermethylated |
| cg06391932 | 0.27136 | 0.43666973  | 0.686334 | 3.23E-05 | hypermethylated |
| cg15821562 | 0.43625 | 0.701988649 | 0.686293 | 2.57E-05 | hypermethylated |
| cg06942814 | 0.33258 | 0.535163784 | 0.686279 | 6.22E-06 | hypermethylated |
| cg13246242 | 0.22059 | 0.354956757 | 0.686276 | 0.000112 | hypermethylated |
| cg07050692 | 0.42476 | 0.683447568 | 0.686183 | 0.005606 | hypermethylated |
| cg03074925 | 0.20948 | 0.337055676 | 0.686174 | 1.46E-05 | hypermethylated |
| cg22244192 | 0.26115 | 0.420167568 | 0.686086 | 7.75E-05 | hypermethylated |
| cg12526923 | 0.3559  | 0.572607027 | 0.686073 | 0.001031 | hypermethylated |
| cg12141135 | 0.21457 | 0.345172973 | 0.685871 | 9.72E-05 | hypermethylated |
| cg00601836 | 0.43273 | 0.696099459 | 0.685826 | 0.002455 | hypermethylated |
| cg05655885 | 0.31128 | 0.500721622 | 0.685796 | 0.000166 | hypermethylated |
| cg18984724 | 0.28719 | 0.461965946 | 0.685781 | 7.38E-05 | hypermethylated |
| cg07605285 | 0.30134 | 0.484725405 | 0.685776 | 1.40E-05 | hypermethylated |
| cg09399716 | 0.24741 | 0.397968649 | 0.685751 | 0.004445 | hypermethylated |
| cg16001165 | 0.28683 | 0.461367027 | 0.685719 | 0.003195 | hypermethylated |
| cg23547017 | 0.25421 | 0.408818378 | 0.685439 | 4.15E-05 | hypermethylated |
| cg01196950 | 0.24886 | 0.400196757 | 0.685375 | 0.000382 | hypermethylated |
| cg26457809 | 0.27431 | 0.440964865 | 0.684856 | 7.38E-05 | hypermethylated |
| cg04565337 | 0.31248 | 0.502295135 | 0.684771 | 8.60E-06 | hypermethylated |
| cg11564711 | 0.25376 | 0.407863784 | 0.684623 | 8.84E-05 | hypermethylated |
| cg16458596 | 0.24967 | 0.401257297 | 0.684505 | 1.12E-05 | hypermethylated |
| cg25614364 | 0.43019 | 0.691379459 | 0.684504 | 0.007035 | hypermethylated |
| cg09890775 | 0.30767 | 0.494415135 | 0.684339 | 8.37E-06 | hypermethylated |
| cg04880138 | 0.49171 | 0.790092432 | 0.684214 | 0.000327 | hypermethylated |
| cg14270434 | 0.34257 | 0.550441081 | 0.684189 | 0.00017  | hypermethylated |
| cg08845721 | 0.43944 | 0.70606     | 0.684125 | 0.000667 | hypermethylated |
| cg09743950 | 0.30355 | 0.487697838 | 0.684053 | 0.004172 | hypermethylated |
| cg18592365 | 0.19892 | 0.319494054 | 0.683601 | 0.000435 | hypermethylated |
| cg18331466 | 0.22226 | 0.356938378 | 0.683427 | 7.84E-05 | hypermethylated |
| cg13149245 | 0.30043 | 0.482278919 | 0.682839 | 0.004134 | hypermethylated |
| cg10244666 | 0.40507 | 0.650241081 | 0.682803 | 0.014258 | hypermethylated |
| cg16631083 | 0.40287 | 0.646706486 | 0.682797 | 0.001423 | hypermethylated |
| cg08328513 | 0.29957 | 0.480748649 | 0.68239  | 0.000176 | hypermethylated |
| cg27435498 | 0.31622 | 0.50728     | 0.681854 | 1.25E-05 | hypermethylated |
| cg24471254 | 0.43697 | 0.70098     | 0.681839 | 7.93E-05 | hypermethylated |
| cg09774917 | 0.23328 | 0.37421027  | 0.681787 | 5.07E-06 | hypermethylated |
| cg09099830 | 0.25514 | 0.409164324 | 0.681391 | 0.00064  | hypermethylated |
| cg02260587 | 0.2658  | 0.426200541 | 0.681191 | 7.38E-05 | hypermethylated |
| cg16512661 | 0.29697 | 0.476152432 | 0.681106 | 1.54E-05 | hypermethylated |
| cg21238818 | 0.20812 | 0.333641622 | 0.680884 | 0.000303 | hypermethylated |
| cg01442953 | 0.24251 | 0.388676216 | 0.680525 | 0.000495 | hypermethylated |
| cg14959580 | 0.27149 | 0.435099459 | 0.680446 | 0.000256 | hypermethylated |
| cg22152229 | 0.37954 | 0.608254054 | 0.680422 | 5.45E-05 | hypermethylated |
| cg12754571 | 0.33874 | 0.542847027 | 0.680367 | 0.00032  | hypermethylated |
| cg00469856 | 0.22135 | 0.354718919 | 0.680347 | 6.38E-05 | hypermethylated |
| cg26801014 | 0.20869 | 0.334430811 | 0.680346 | 0.000163 | hypermethylated |
| cg10717869 | 0.32392 | 0.519048108 | 0.680231 | 0.003506 | hypermethylated |
| cg06553058 | 0.35152 | 0.563114595 | 0.679822 | 0.001327 | hypermethylated |
| cg18824549 | 0.28113 | 0.450268108 | 0.679547 | 0.017101 | hypermethylated |
| cg00085013 | 0.332   | 0.531723243 | 0.679492 | 7.47E-05 | hypermethylated |
| cg07630723 | 0.20471 | 0.327799459 | 0.679232 | 0.000365 | hypermethylated |
| cg21893358 | 0.2878  | 0.460723243 | 0.678834 | 2.15E-05 | hypermethylated |
| cg21648941 | 0.25423 | 0.406950811 | 0.67872  | 0.000182 | hypermethylated |

|            |         |             |          |          |                 |
|------------|---------|-------------|----------|----------|-----------------|
| cg00650641 | 0.3449  | 0.552015676 | 0.678531 | 6.39E-06 | hypermethylated |
| cg10107473 | 0.30091 | 0.481591351 | 0.678477 | 0.003473 | hypermethylated |
| cg16134678 | 0.26685 | 0.427022703 | 0.678284 | 0.000382 | hypermethylated |
| cg25824760 | 0.19311 | 0.309011351 | 0.678237 | 0.001635 | hypermethylated |
| cg22832557 | 0.38764 | 0.620285405 | 0.678215 | 0.000152 | hypermethylated |
| cg15074709 | 0.30296 | 0.484696757 | 0.677955 | 3.76E-05 | hypermethylated |
| cg18836745 | 0.23993 | 0.383842162 | 0.6779   | 0.000187 | hypermethylated |
| cg26158150 | 0.20762 | 0.332001081 | 0.677243 | 0.000202 | hypermethylated |
| cg24999105 | 0.3587  | 0.573523784 | 0.677076 | 0.000214 | hypermethylated |
| cg14456683 | 0.29753 | 0.475582162 | 0.676659 | 1.06E-05 | hypermethylated |
| cg04344018 | 0.23198 | 0.370631351 | 0.675984 | 0.000207 | hypermethylated |
| cg17894318 | 0.24468 | 0.390861081 | 0.67576  | 6.78E-05 | hypermethylated |
| cg21006031 | 0.29727 | 0.47486973  | 0.675758 | 0.000212 | hypermethylated |
| cg01361263 | 0.34149 | 0.545421622 | 0.675529 | 0.000417 | hypermethylated |
| cg16134191 | 0.22924 | 0.366102703 | 0.67539  | 4.82E-05 | hypermethylated |
| cg06757585 | 0.3266  | 0.521507568 | 0.675163 | 0.000327 | hypermethylated |
| cg24900983 | 0.22191 | 0.354338919 | 0.675155 | 7.12E-05 | hypermethylated |
| cg14325153 | 0.40034 | 0.639228108 | 0.675105 | 0.000528 | hypermethylated |
| cg21566642 | 0.24948 | 0.398342703 | 0.675086 | 0.000626 | hypermethylated |
| cg03032497 | 0.29904 | 0.477472973 | 0.675081 | 5.00E-05 | hypermethylated |
| cg16909495 | 0.26931 | 0.430002162 | 0.675076 | 0.000251 | hypermethylated |
| cg26279070 | 0.31545 | 0.503658378 | 0.675034 | 1.39E-05 | hypermethylated |
| cg18498241 | 0.35628 | 0.568705946 | 0.674671 | 7.72E-06 | hypermethylated |
| cg05266564 | 0.30038 | 0.479349189 | 0.674288 | 3.57E-05 | hypermethylated |
| cg23251701 | 0.3179  | 0.507251351 | 0.674128 | 0.009713 | hypermethylated |
| cg02770983 | 0.33044 | 0.527187027 | 0.673927 | 0.000142 | hypermethylated |
| cg25621182 | 0.15762 | 0.251461622 | 0.673888 | 0.00017  | hypermethylated |
| cg20046343 | 0.29736 | 0.474338378 | 0.673706 | 3.49E-05 | hypermethylated |
| cg00210249 | 0.30557 | 0.487312432 | 0.673344 | 0.008208 | hypermethylated |
| cg05107535 | 0.41068 | 0.654894054 | 0.673247 | 6.01E-05 | hypermethylated |
| cg02434121 | 0.32674 | 0.521019459 | 0.673194 | 0.001839 | hypermethylated |
| cg06373870 | 0.32315 | 0.515273514 | 0.673134 | 4.36E-05 | hypermethylated |
| cg23449696 | 0.32342 | 0.515703243 | 0.673132 | 0.000166 | hypermethylated |
| cg19698137 | 0.25374 | 0.404551892 | 0.672974 | 0.000123 | hypermethylated |
| cg21002957 | 0.38184 | 0.608733514 | 0.672843 | 0.006395 | hypermethylated |
| cg17508591 | 0.34456 | 0.549273514 | 0.672769 | 7.86E-07 | hypermethylated |
| cg14872762 | 0.31122 | 0.496091351 | 0.672671 | 0.000313 | hypermethylated |
| cg03714676 | 0.44891 | 0.715541622 | 0.672609 | 0.000358 | hypermethylated |
| cg11356767 | 0.25878 | 0.412472432 | 0.672572 | 0.000306 | hypermethylated |
| cg02213260 | 0.23716 | 0.377978378 | 0.672443 | 0.000789 | hypermethylated |
| cg08640361 | 0.32259 | 0.514118378 | 0.672399 | 0.002856 | hypermethylated |
| cg09057517 | 0.26972 | 0.42983027  | 0.672305 | 0.000216 | hypermethylated |
| cg22022798 | 0.36734 | 0.585337838 | 0.672154 | 0.000145 | hypermethylated |
| cg18806140 | 0.30031 | 0.478490811 | 0.672039 | 0.000248 | hypermethylated |
| cg02051616 | 0.3068  | 0.488796757 | 0.671936 | 1.31E-05 | hypermethylated |
| cg14001023 | 0.33657 | 0.536223784 | 0.671929 | 0.000506 | hypermethylated |
| cg19389884 | 0.28675 | 0.456780541 | 0.671708 | 0.000382 | hypermethylated |
| cg02183564 | 0.322   | 0.512896216 | 0.671606 | 0.000528 | hypermethylated |
| cg08100944 | 0.17507 | 0.278836216 | 0.671486 | 0.000124 | hypermethylated |
| cg04171235 | 0.31498 | 0.501655135 | 0.671436 | 3.27E-05 | hypermethylated |
| cg03685886 | 0.30962 | 0.493103243 | 0.671391 | 0.000399 | hypermethylated |
| cg27343836 | 0.25385 | 0.404265946 | 0.671328 | 4.00E-05 | hypermethylated |
| cg22763649 | 0.27612 | 0.439723784 | 0.671302 | 4.31E-05 | hypermethylated |
| cg04914126 | 0.31863 | 0.507415676 | 0.671286 | 0.001734 | hypermethylated |
| cg06981948 | 0.3308  | 0.526740541 | 0.671133 | 4.82E-05 | hypermethylated |
| cg03234702 | 0.45239 | 0.720178378 | 0.670787 | 0.000262 | hypermethylated |
| cg16551520 | 0.3204  | 0.51        | 0.670623 | 0.003136 | hypermethylated |
| cg19685491 | 0.34117 | 0.542987568 | 0.670428 | 4.36E-05 | hypermethylated |

|            |         |             |          |          |                 |
|------------|---------|-------------|----------|----------|-----------------|
| cg17300723 | 0.24819 | 0.394993514 | 0.670384 | 0.000839 | hypermethylated |
| cg03793270 | 0.30477 | 0.485032432 | 0.67036  | 4.64E-05 | hypermethylated |
| cg03433597 | 0.2813  | 0.447675676 | 0.670344 | 9.27E-05 | hypermethylated |
| cg06515771 | 0.24505 | 0.389951351 | 0.670218 | 0.000132 | hypermethylated |
| cg18579879 | 0.28422 | 0.452244865 | 0.670096 | 3.32E-05 | hypermethylated |
| cg16519487 | 0.28363 | 0.451268649 | 0.669976 | 1.65E-06 | hypermethylated |
| cg13933080 | 0.31323 | 0.498284865 | 0.669748 | 2.39E-05 | hypermethylated |
| cg27561818 | 0.50138 | 0.797568649 | 0.669704 | 0.003505 | hypermethylated |
| cg05266537 | 0.24083 | 0.383099459 | 0.669704 | 1.73E-05 | hypermethylated |
| cg02852670 | 0.30777 | 0.489562703 | 0.669641 | 0.001556 | hypermethylated |
| cg25678088 | 0.24686 | 0.392668649 | 0.669619 | 1.46E-05 | hypermethylated |
| cg26328180 | 0.34446 | 0.547756757 | 0.669199 | 1.38E-05 | hypermethylated |
| cg14622069 | 0.26433 | 0.420312973 | 0.669124 | 2.26E-06 | hypermethylated |
| cg09523275 | 0.25469 | 0.404975676 | 0.669093 | 8.22E-05 | hypermethylated |
| cg04965050 | 0.25016 | 0.397755135 | 0.669029 | 0.000242 | hypermethylated |
| cg00363813 | 0.27613 | 0.439038919 | 0.669001 | 0.000166 | hypermethylated |
| cg13686751 | 0.32775 | 0.521037297 | 0.668791 | 8.22E-05 | hypermethylated |
| cg21390624 | 0.33906 | 0.538897297 | 0.66847  | 0.000108 | hypermethylated |
| cg00445443 | 0.2492  | 0.396072432 | 0.66846  | 0.001188 | hypermethylated |
| cg21828951 | 0.19462 | 0.309265946 | 0.668188 | 0.00049  | hypermethylated |
| cg13729816 | 0.3341  | 0.530851351 | 0.668028 | 0.000303 | hypermethylated |
| cg05579030 | 0.30189 | 0.479649189 | 0.667957 | 8.63E-05 | hypermethylated |
| cg25789916 | 0.24414 | 0.387888108 | 0.667932 | 0.000187 | hypermethylated |
| cg20847580 | 0.29772 | 0.473012973 | 0.667924 | 3.23E-05 | hypermethylated |
| cg14273502 | 0.31736 | 0.504198378 | 0.667871 | 1.80E-05 | hypermethylated |
| cg24803719 | 0.27895 | 0.44311027  | 0.667659 | 0.000374 | hypermethylated |
| cg07273003 | 0.45799 | 0.727375676 | 0.667385 | 0.001619 | hypermethylated |
| cg00652908 | 0.26193 | 0.415869189 | 0.666948 | 5.72E-05 | hypermethylated |
| cg24469464 | 0.40548 | 0.643672973 | 0.666697 | 7.93E-06 | hypermethylated |
| cg08316825 | 0.26498 | 0.420576216 | 0.666484 | 1.14E-05 | hypermethylated |
| cg22344631 | 0.24288 | 0.385475135 | 0.666394 | 0.000212 | hypermethylated |
| cg04615460 | 0.25261 | 0.40086     | 0.666187 | 0.000511 | hypermethylated |
| cg04701505 | 0.23342 | 0.370337838 | 0.665914 | 0.000112 | hypermethylated |
| cg04027736 | 0.27825 | 0.441462703 | 0.66591  | 0.007536 | hypermethylated |
| cg13911707 | 0.33932 | 0.538284865 | 0.665723 | 0.001734 | hypermethylated |
| cg06993512 | 0.25995 | 0.412354054 | 0.665649 | 0.000408 | hypermethylated |
| cg10172432 | 0.25956 | 0.411700541 | 0.665527 | 0.000214 | hypermethylated |
| cg04847275 | 0.48724 | 0.772682162 | 0.665243 | 0.002409 | hypermethylated |
| cg03794214 | 0.39447 | 0.625477297 | 0.665042 | 0.000613 | hypermethylated |
| cg02034311 | 0.27061 | 0.429057838 | 0.664957 | 8.84E-05 | hypermethylated |
| cg09595050 | 0.41904 | 0.664053514 | 0.664212 | 0.000224 | hypermethylated |
| cg26578682 | 0.29133 | 0.461625405 | 0.664068 | 4.05E-05 | hypermethylated |
| cg10383568 | 0.40891 | 0.64788973  | 0.663965 | 0.000126 | hypermethylated |
| cg25215834 | 0.25356 | 0.401700541 | 0.663793 | 0.000725 | hypermethylated |
| cg19304273 | 0.44661 | 0.707505405 | 0.663726 | 1.46E-05 | hypermethylated |
| cg17238766 | 0.25143 | 0.398253514 | 0.66353  | 9.95E-05 | hypermethylated |
| cg11235602 | 0.25146 | 0.398289189 | 0.663487 | 0.000229 | hypermethylated |
| cg24154937 | 0.28346 | 0.448961622 | 0.663447 | 2.04E-05 | hypermethylated |
| cg18921954 | 0.24439 | 0.38696     | 0.662999 | 0.000749 | hypermethylated |
| cg06514855 | 0.2569  | 0.406510811 | 0.662087 | 7.47E-05 | hypermethylated |
| cg04794430 | 0.34202 | 0.541175135 | 0.662015 | 0.000224 | hypermethylated |
| cg05648614 | 0.44181 | 0.699047568 | 0.661965 | 6.15E-05 | hypermethylated |
| cg05617469 | 0.26308 | 0.416237297 | 0.661905 | 3.40E-05 | hypermethylated |
| cg23671082 | 0.18311 | 0.289702162 | 0.66186  | 4.15E-05 | hypermethylated |
| cg09059267 | 0.3157  | 0.499444865 | 0.661771 | 0.000187 | hypermethylated |
| cg05492170 | 0.28941 | 0.457685946 | 0.661243 | 1.66E-05 | hypermethylated |
| cg08923271 | 0.31276 | 0.494515135 | 0.660959 | 7.47E-05 | hypermethylated |
| cg04493169 | 0.44114 | 0.697484865 | 0.660925 | 0.001603 | hypermethylated |

|            |         |             |          |          |                 |
|------------|---------|-------------|----------|----------|-----------------|
| cg22424284 | 0.5826  | 0.921115135 | 0.660876 | 0.000102 | hypermethylated |
| cg22916586 | 0.36744 | 0.580767027 | 0.660451 | 0.000155 | hypermethylated |
| cg25951210 | 0.30158 | 0.476565946 | 0.660135 | 2.21E-05 | hypermethylated |
| cg21737226 | 0.31609 | 0.499488649 | 0.660116 | 7.12E-05 | hypermethylated |
| cg02147194 | 0.29246 | 0.462083243 | 0.659913 | 1.94E-05 | hypermethylated |
| cg00517787 | 0.29501 | 0.466085405 | 0.65983  | 8.95E-06 | hypermethylated |
| cg13641903 | 0.32916 | 0.519982703 | 0.659675 | 4.36E-06 | hypermethylated |
| cg13694927 | 0.35755 | 0.564807027 | 0.659613 | 7.65E-05 | hypermethylated |
| cg10266211 | 0.35201 | 0.556050811 | 0.6596   | 7.32E-06 | hypermethylated |
| cg13031611 | 0.29519 | 0.465954054 | 0.658544 | 0.000123 | hypermethylated |
| cg08081407 | 0.18936 | 0.298862703 | 0.658351 | 0.000245 | hypermethylated |
| cg08451582 | 0.18322 | 0.289145946 | 0.658221 | 0.000152 | hypermethylated |
| cg22121557 | 0.31699 | 0.500067568 | 0.657686 | 5.73E-06 | hypermethylated |
| cg05711980 | 0.21767 | 0.343372432 | 0.657632 | 9.31E-06 | hypermethylated |
| cg27513935 | 0.21454 | 0.33838973  | 0.657439 | 0.000408 | hypermethylated |
| cg00730561 | 0.2754  | 0.434378919 | 0.657426 | 0.000696 | hypermethylated |
| cg17781710 | 0.2378  | 0.374973514 | 0.65704  | 4.15E-05 | hypermethylated |
| cg09656389 | 0.30211 | 0.476317297 | 0.656849 | 0.000474 | hypermethylated |
| cg12320039 | 0.2777  | 0.437805405 | 0.656763 | 5.00E-06 | hypermethylated |
| cg17963840 | 0.27575 | 0.43473027  | 0.65676  | 3.49E-05 | hypermethylated |
| cg20708961 | 0.25165 | 0.396721622 | 0.656708 | 7.93E-06 | hypermethylated |
| cg16449219 | 0.43132 | 0.679673514 | 0.656083 | 0.004287 | hypermethylated |
| cg21298174 | 0.28289 | 0.445741081 | 0.655965 | 1.26E-05 | hypermethylated |
| cg00919411 | 0.27296 | 0.430002703 | 0.655656 | 6.22E-06 | hypermethylated |
| cg12383699 | 0.26214 | 0.4129      | 0.655455 | 0.000126 | hypermethylated |
| cg05700079 | 0.29765 | 0.468800541 | 0.655357 | 1.15E-05 | hypermethylated |
| cg26670249 | 0.24628 | 0.387847568 | 0.65519  | 0.002046 | hypermethylated |
| cg16855929 | 0.52279 | 0.823142162 | 0.65491  | 3.76E-05 | hypermethylated |
| cg10377921 | 0.27694 | 0.435984865 | 0.654705 | 0.010042 | hypermethylated |
| cg00599770 | 0.23733 | 0.373623243 | 0.65469  | 1.01E-05 | hypermethylated |
| cg26194089 | 0.28482 | 0.448254054 | 0.654266 | 5.06E-05 | hypermethylated |
| cg18632637 | 0.38393 | 0.604128649 | 0.654013 | 0.00097  | hypermethylated |
| cg14216068 | 0.40405 | 0.635721622 | 0.653861 | 0.004096 | hypermethylated |
| cg01218896 | 0.29162 | 0.458799459 | 0.653774 | 2.15E-05 | hypermethylated |
| cg07698121 | 0.34663 | 0.545168108 | 0.653305 | 0.005316 | hypermethylated |
| cg23666378 | 0.27563 | 0.433489189 | 0.653263 | 0.000134 | hypermethylated |
| cg13842240 | 0.27095 | 0.426078378 | 0.653092 | 1.17E-05 | hypermethylated |
| cg03811478 | 0.19775 | 0.310947027 | 0.652991 | 4.42E-06 | hypermethylated |
| cg15743907 | 0.33469 | 0.526267568 | 0.652971 | 9.72E-05 | hypermethylated |
| cg24211976 | 0.36177 | 0.568825405 | 0.652913 | 0.001096 | hypermethylated |
| cg05768922 | 0.2115  | 0.332509189 | 0.652737 | 0.001288 | hypermethylated |
| cg04927004 | 0.26071 | 0.40986973  | 0.65272  | 3.15E-05 | hypermethylated |
| cg12006284 | 0.34889 | 0.548391351 | 0.652434 | 5.58E-05 | hypermethylated |
| cg26248586 | 0.40662 | 0.638980541 | 0.652091 | 0.003986 | hypermethylated |
| cg12591491 | 0.25685 | 0.403585405 | 0.651948 | 1.94E-05 | hypermethylated |
| cg26530319 | 0.34854 | 0.547651351 | 0.651933 | 0.000268 | hypermethylated |
| cg17242351 | 0.35084 | 0.551147027 | 0.651624 | 0.000374 | hypermethylated |
| cg20308540 | 0.2429  | 0.381537838 | 0.651464 | 0.000912 | hypermethylated |
| cg23986620 | 0.33505 | 0.526178919 | 0.651177 | 0.000161 | hypermethylated |
| cg25647300 | 0.2596  | 0.407610811 | 0.650902 | 0.006015 | hypermethylated |
| cg16744996 | 0.35768 | 0.561564324 | 0.650782 | 5.86E-05 | hypermethylated |
| cg03398865 | 0.25507 | 0.400462162 | 0.650773 | 5.58E-06 | hypermethylated |
| cg16046493 | 0.50609 | 0.794465405 | 0.65059  | 0.00095  | hypermethylated |
| cg25217100 | 0.34262 | 0.537652432 | 0.650064 | 0.000287 | hypermethylated |
| cg20632143 | 0.26563 | 0.416777838 | 0.64986  | 0.000485 | hypermethylated |
| cg00096810 | 0.28346 | 0.444717297 | 0.649743 | 2.32E-05 | hypermethylated |
| cg22970357 | 0.27816 | 0.436394054 | 0.649716 | 0.000191 | hypermethylated |
| cg06675538 | 0.35083 | 0.550382162 | 0.649662 | 0.000262 | hypermethylated |

|            |         |             |          |          |                 |
|------------|---------|-------------|----------|----------|-----------------|
| cg21216477 | 0.28073 | 0.44033027  | 0.649403 | 5.12E-05 | hypermethylated |
| cg16582779 | 0.2114  | 0.331565405 | 0.649318 | 6.39E-06 | hypermethylated |
| cg24170248 | 0.35594 | 0.558108649 | 0.648912 | 9.16E-05 | hypermethylated |
| cg11496364 | 0.25547 | 0.400566486 | 0.648888 | 3.00E-05 | hypermethylated |
| cg07208161 | 0.26137 | 0.409795135 | 0.648809 | 3.95E-05 | hypermethylated |
| cg01748892 | 0.30119 | 0.472105946 | 0.648437 | 0.000115 | hypermethylated |
| cg22797270 | 0.30588 | 0.479352432 | 0.648121 | 0.000195 | hypermethylated |
| cg19516404 | 0.2474  | 0.387617838 | 0.647789 | 1.75E-05 | hypermethylated |
| cg07996594 | 0.33635 | 0.526968108 | 0.647752 | 0.002409 | hypermethylated |
| cg06926146 | 0.29253 | 0.45831027  | 0.64774  | 9.05E-05 | hypermethylated |
| cg17548735 | 0.45879 | 0.718763243 | 0.647683 | 0.001212 | hypermethylated |
| cg03468072 | 0.28306 | 0.443446486 | 0.647652 | 5.58E-05 | hypermethylated |
| cg00998744 | 0.27468 | 0.43018     | 0.647189 | 0.000107 | hypermethylated |
| cg03768916 | 0.24268 | 0.380063243 | 0.647184 | 2.64E-05 | hypermethylated |
| cg00792513 | 0.31152 | 0.487831351 | 0.647058 | 8.22E-05 | hypermethylated |
| cg04485799 | 0.25138 | 0.393646486 | 0.647031 | 0.000108 | hypermethylated |
| cg03993263 | 0.18223 | 0.28534     | 0.646922 | 4.94E-05 | hypermethylated |
| cg07823492 | 0.49116 | 0.769064865 | 0.646912 | 0.001452 | hypermethylated |
| cg07266350 | 0.51843 | 0.811708108 | 0.646812 | 0.001052 | hypermethylated |
| cg20596162 | 0.23602 | 0.369527027 | 0.646771 | 0.000152 | hypermethylated |
| cg22022580 | 0.38364 | 0.600604865 | 0.646663 | 0.004445 | hypermethylated |
| cg03190219 | 0.4589  | 0.718185946 | 0.646178 | 7.93E-06 | hypermethylated |
| cg13400512 | 0.31013 | 0.485336216 | 0.646111 | 0.001074 | hypermethylated |
| cg00871610 | 0.27748 | 0.434167568 | 0.645868 | 0.002751 | hypermethylated |
| cg21415530 | 0.31102 | 0.486635676 | 0.645835 | 0.000232 | hypermethylated |
| cg04498349 | 0.25367 | 0.396895676 | 0.645807 | 2.78E-05 | hypermethylated |
| cg21664030 | 0.22423 | 0.350832432 | 0.645803 | 0.000224 | hypermethylated |
| cg21951729 | 0.26657 | 0.417054595 | 0.645722 | 9.27E-05 | hypermethylated |
| cg14573448 | 0.35349 | 0.553010811 | 0.645638 | 0.000789 | hypermethylated |
| cg24224304 | 0.28612 | 0.447604865 | 0.645605 | 6.70E-05 | hypermethylated |
| cg16703762 | 0.32054 | 0.501387568 | 0.645422 | 0.000107 | hypermethylated |
| cg04436207 | 0.32073 | 0.501684324 | 0.645421 | 0.000256 | hypermethylated |
| cg12694372 | 0.37814 | 0.591396216 | 0.645205 | 0.002502 | hypermethylated |
| cg12727940 | 0.44121 | 0.69000973  | 0.645151 | 0.00044  | hypermethylated |
| cg12017745 | 0.45762 | 0.715593514 | 0.64499  | 0.002066 | hypermethylated |
| cg16786808 | 0.45581 | 0.712561622 | 0.644582 | 0.000159 | hypermethylated |
| cg07824172 | 0.31731 | 0.495943784 | 0.644284 | 0.000563 | hypermethylated |
| cg16638920 | 0.31985 | 0.499904324 | 0.644257 | 2.45E-05 | hypermethylated |
| cg18255813 | 0.43185 | 0.674917838 | 0.644182 | 0.004692 | hypermethylated |
| cg02718825 | 0.27724 | 0.433250811 | 0.644067 | 6.31E-05 | hypermethylated |
| cg16834823 | 0.3994  | 0.624069189 | 0.643872 | 0.00291  | hypermethylated |
| cg21915313 | 0.37252 | 0.582028649 | 0.643772 | 0.000271 | hypermethylated |
| cg15638414 | 0.24349 | 0.380404865 | 0.643673 | 0.000132 | hypermethylated |
| cg04858155 | 0.23825 | 0.372205946 | 0.643625 | 2.74E-05 | hypermethylated |
| cg02058108 | 0.32163 | 0.50238     | 0.643377 | 0.000306 | hypermethylated |
| cg25493589 | 0.26038 | 0.406697297 | 0.643337 | 3.32E-05 | hypermethylated |
| cg10912240 | 0.23841 | 0.372362162 | 0.643262 | 1.56E-05 | hypermethylated |
| cg04676482 | 0.28796 | 0.449702703 | 0.643103 | 1.67E-06 | hypermethylated |
| cg07599881 | 0.28047 | 0.437997838 | 0.643077 | 8.94E-05 | hypermethylated |
| cg09151762 | 0.22362 | 0.349191351 | 0.642969 | 2.32E-05 | hypermethylated |
| cg09413529 | 0.37503 | 0.58562     | 0.642959 | 8.22E-05 | hypermethylated |
| cg14324816 | 0.2666  | 0.416131351 | 0.642362 | 0.000109 | hypermethylated |
| cg06942685 | 0.22    | 0.343359459 | 0.642216 | 3.85E-05 | hypermethylated |
| cg10195169 | 0.29046 | 0.453282703 | 0.642072 | 0.004951 | hypermethylated |
| cg12745203 | 0.30312 | 0.473016757 | 0.642002 | 3.07E-05 | hypermethylated |
| cg10661615 | 0.24506 | 0.38238973  | 0.641909 | 8.13E-05 | hypermethylated |
| cg26096837 | 0.33249 | 0.518791892 | 0.641845 | 0.000115 | hypermethylated |
| cg07591229 | 0.23549 | 0.367401081 | 0.64169  | 0.004326 | hypermethylated |

|            |         |             |          |          |                 |
|------------|---------|-------------|----------|----------|-----------------|
| cg15824707 | 0.31568 | 0.492452973 | 0.641523 | 5.14E-06 | hypermethylated |
| cg08819431 | 0.40457 | 0.631014595 | 0.641284 | 0.00421  | hypermethylated |
| cg09268963 | 0.40688 | 0.634499459 | 0.641016 | 0.00049  | hypermethylated |
| cg17519645 | 0.33479 | 0.522025946 | 0.640865 | 0.00062  | hypermethylated |
| cg22008851 | 0.29122 | 0.454079459 | 0.640835 | 3.62E-05 | hypermethylated |
| cg26034658 | 0.42088 | 0.656205405 | 0.640739 | 1.35E-05 | hypermethylated |
| cg02025583 | 0.2255  | 0.351564865 | 0.640663 | 0.000277 | hypermethylated |
| cg02416510 | 0.30715 | 0.478600541 | 0.639879 | 4.64E-05 | hypermethylated |
| cg17563034 | 0.25307 | 0.39427027  | 0.639648 | 0.000159 | hypermethylated |
| cg15386434 | 0.25756 | 0.40122     | 0.639485 | 0.000613 | hypermethylated |
| cg13337064 | 0.32502 | 0.506255135 | 0.639336 | 0.000142 | hypermethylated |
| cg15798385 | 0.39225 | 0.610963243 | 0.639312 | 5.72E-05 | hypermethylated |
| cg12484113 | 0.19225 | 0.299434054 | 0.639255 | 0.001212 | hypermethylated |
| cg06211872 | 0.33003 | 0.514027568 | 0.639249 | 0.000112 | hypermethylated |
| cg21464220 | 0.45599 | 0.71019027  | 0.639203 | 0.003843 | hypermethylated |
| cg12508451 | 0.27981 | 0.435772973 | 0.639129 | 0.000469 | hypermethylated |
| cg12835736 | 0.37862 | 0.589624324 | 0.639045 | 7.47E-05 | hypermethylated |
| cg06388730 | 0.2775  | 0.432097838 | 0.63887  | 1.71E-05 | hypermethylated |
| cg06268875 | 0.28547 | 0.444501622 | 0.63885  | 0.000358 | hypermethylated |
| cg21980338 | 0.24284 | 0.378088108 | 0.638716 | 0.000122 | hypermethylated |
| cg12426612 | 0.39196 | 0.610215135 | 0.638612 | 0.000365 | hypermethylated |
| cg08525845 | 0.24398 | 0.379657297 | 0.637935 | 1.06E-05 | hypermethylated |
| cg04744409 | 0.36449 | 0.567157297 | 0.63787  | 0.00097  | hypermethylated |
| cg08598654 | 0.24811 | 0.386062703 | 0.637855 | 0.000178 | hypermethylated |
| cg14500300 | 0.31783 | 0.49451027  | 0.637745 | 0.002624 | hypermethylated |
| cg20586076 | 0.35396 | 0.550683784 | 0.637638 | 3.57E-05 | hypermethylated |
| cg17611674 | 0.2854  | 0.443974595 | 0.637492 | 6.46E-05 | hypermethylated |
| cg11625005 | 0.35883 | 0.558177297 | 0.637423 | 1.58E-05 | hypermethylated |
| cg20289911 | 0.26757 | 0.416212432 | 0.637404 | 9.95E-05 | hypermethylated |
| cg07547765 | 0.43724 | 0.680065405 | 0.637248 | 0.000569 | hypermethylated |
| cg02655630 | 0.26652 | 0.414490811 | 0.637096 | 1.54E-05 | hypermethylated |
| cg20474425 | 0.33196 | 0.516210811 | 0.636951 | 1.75E-05 | hypermethylated |
| cg05764839 | 0.33513 | 0.521086486 | 0.636802 | 1.77E-06 | hypermethylated |
| cg24391460 | 0.33362 | 0.518725405 | 0.636765 | 3.49E-05 | hypermethylated |
| cg04268624 | 0.41571 | 0.646356757 | 0.636753 | 0.000374 | hypermethylated |
| cg18280830 | 0.32992 | 0.512909189 | 0.636587 | 0.00013  | hypermethylated |
| cg25590826 | 0.32368 | 0.503163243 | 0.636458 | 0.000216 | hypermethylated |
| cg10068417 | 0.39939 | 0.62074973  | 0.636214 | 8.22E-05 | hypermethylated |
| cg16752592 | 0.39587 | 0.615071892 | 0.635728 | 0.006507 | hypermethylated |
| cg13521620 | 0.45331 | 0.704262162 | 0.635615 | 0.000271 | hypermethylated |
| cg11696200 | 0.47955 | 0.74488     | 0.635327 | 0.005963 | hypermethylated |
| cg18335796 | 0.38146 | 0.592481081 | 0.635237 | 0.000237 | hypermethylated |
| cg04907173 | 0.32397 | 0.50316     | 0.635157 | 6.31E-05 | hypermethylated |
| cg03758467 | 0.33733 | 0.523892973 | 0.635111 | 3.23E-05 | hypermethylated |
| cg07562888 | 0.41949 | 0.651473514 | 0.63507  | 0.000296 | hypermethylated |
| cg23015341 | 0.21451 | 0.333121081 | 0.635002 | 2.64E-05 | hypermethylated |
| cg05574272 | 0.3026  | 0.469858919 | 0.634816 | 0.000112 | hypermethylated |
| cg07462292 | 0.24245 | 0.376412432 | 0.634627 | 1.15E-05 | hypermethylated |
| cg27151303 | 0.35659 | 0.553615135 | 0.634617 | 0.000358 | hypermethylated |
| cg11382529 | 0.4212  | 0.653897838 | 0.63456  | 0.000102 | hypermethylated |
| cg21707172 | 0.4881  | 0.757744865 | 0.634535 | 2.21E-05 | hypermethylated |
| cg03501539 | 0.45951 | 0.713225405 | 0.634262 | 0.008208 | hypermethylated |
| cg09247060 | 0.198   | 0.307303784 | 0.634165 | 7.29E-05 | hypermethylated |
| cg04737133 | 0.26094 | 0.404937838 | 0.633982 | 1.54E-05 | hypermethylated |
| cg06726820 | 0.36785 | 0.570823784 | 0.633928 | 0.000528 | hypermethylated |
| cg14830601 | 0.29182 | 0.452814595 | 0.633842 | 5.58E-05 | hypermethylated |
| cg25967031 | 0.46594 | 0.722991351 | 0.633834 | 0.000789 | hypermethylated |
| cg03785076 | 0.3208  | 0.497706486 | 0.633621 | 0.004287 | hypermethylated |

|            |         |             |          |          |                 |
|------------|---------|-------------|----------|----------|-----------------|
| cg04161526 | 0.26987 | 0.418663784 | 0.633528 | 0.00024  | hypermethylated |
| cg14535980 | 0.27749 | 0.430422703 | 0.633318 | 2.92E-05 | hypermethylated |
| cg07852825 | 0.26585 | 0.412367027 | 0.633317 | 4.36E-05 | hypermethylated |
| cg17280346 | 0.35679 | 0.553412432 | 0.63328  | 0.000174 | hypermethylated |
| cg27454064 | 0.32083 | 0.497540541 | 0.633005 | 7.84E-05 | hypermethylated |
| cg05341781 | 0.42267 | 0.655358378 | 0.632752 | 0.000681 | hypermethylated |
| cg01550348 | 0.45572 | 0.706574595 | 0.632694 | 0.002189 | hypermethylated |
| cg25845985 | 0.27072 | 0.419700541 | 0.632559 | 6.54E-05 | hypermethylated |
| cg20815297 | 0.24699 | 0.382862703 | 0.632374 | 2.42E-05 | hypermethylated |
| cg04273148 | 0.48344 | 0.749378378 | 0.632358 | 0.000382 | hypermethylated |
| cg12453631 | 0.28495 | 0.441684324 | 0.632307 | 3.26E-06 | hypermethylated |
| cg20366906 | 0.2939  | 0.455551351 | 0.632288 | 3.85E-06 | hypermethylated |
| cg02331883 | 0.32676 | 0.506464865 | 0.632231 | 0.000174 | hypermethylated |
| cg26509965 | 0.27257 | 0.42247027  | 0.632223 | 0.000137 | hypermethylated |
| cg23440004 | 0.23363 | 0.362096216 | 0.632148 | 0.00012  | hypermethylated |
| cg13075537 | 0.4239  | 0.656514595 | 0.631103 | 0.003705 | hypermethylated |
| cg01709312 | 0.48629 | 0.753116757 | 0.631057 | 2.39E-05 | hypermethylated |
| cg24366314 | 0.29416 | 0.455554054 | 0.631021 | 0.000229 | hypermethylated |
| cg19021738 | 0.19645 | 0.304232432 | 0.631012 | 0.000178 | hypermethylated |
| cg05973337 | 0.20004 | 0.309769189 | 0.630905 | 2.18E-05 | hypermethylated |
| cg03256198 | 0.5492  | 0.850363784 | 0.630749 | 0.00017  | hypermethylated |
| cg12534008 | 0.30342 | 0.469793514 | 0.630711 | 9.49E-05 | hypermethylated |
| cg26276327 | 0.32037 | 0.496017297 | 0.630651 | 5.58E-05 | hypermethylated |
| cg14672084 | 0.48424 | 0.749666486 | 0.630527 | 0.000287 | hypermethylated |
| cg04374393 | 0.27795 | 0.430158378 | 0.630043 | 3.30E-06 | hypermethylated |
| cg21286967 | 0.26091 | 0.403730811 | 0.629841 | 0.001481 | hypermethylated |
| cg22352078 | 0.29105 | 0.45034973  | 0.629779 | 4.82E-05 | hypermethylated |
| cg09182138 | 0.3267  | 0.50550973  | 0.629772 | 5.28E-06 | hypermethylated |
| cg13759172 | 0.25365 | 0.392448649 | 0.629665 | 1.15E-05 | hypermethylated |
| cg19403534 | 0.29702 | 0.459518378 | 0.629562 | 0.000142 | hypermethylated |
| cg09561125 | 0.33839 | 0.523495135 | 0.629489 | 2.32E-05 | hypermethylated |
| cg07464571 | 0.27587 | 0.426768108 | 0.629464 | 0.000159 | hypermethylated |
| cg03788227 | 0.39933 | 0.61768     | 0.629278 | 0.0006   | hypermethylated |
| cg11739399 | 0.29871 | 0.461983243 | 0.629095 | 0.000117 | hypermethylated |
| cg13680388 | 0.46896 | 0.725138919 | 0.628793 | 0.001511 | hypermethylated |
| cg07816637 | 0.28063 | 0.433927568 | 0.628785 | 8.37E-06 | hypermethylated |
| cg20710709 | 0.27739 | 0.428677297 | 0.627976 | 5.72E-05 | hypermethylated |
| cg07284273 | 0.19353 | 0.299029189 | 0.627729 | 0.000912 | hypermethylated |
| cg11388320 | 0.28928 | 0.446856216 | 0.627344 | 0.0002   | hypermethylated |
| cg25725843 | 0.32189 | 0.497092432 | 0.626946 | 2.51E-05 | hypermethylated |
| cg13381984 | 0.33429 | 0.516208649 | 0.626854 | 8.52E-05 | hypermethylated |
| cg15802263 | 0.26875 | 0.41499027  | 0.626813 | 0.000132 | hypermethylated |
| cg06908618 | 0.42748 | 0.66009027  | 0.626806 | 0.003195 | hypermethylated |
| cg18356785 | 0.38159 | 0.589212973 | 0.626766 | 0.00291  | hypermethylated |
| cg21395577 | 0.23728 | 0.366295135 | 0.626416 | 0.00032  | hypermethylated |
| cg13475333 | 0.42454 | 0.65534973  | 0.626365 | 0.004365 | hypermethylated |
| cg26206456 | 0.44872 | 0.692471892 | 0.62594  | 0.003506 | hypermethylated |
| cg19547547 | 0.30999 | 0.478247027 | 0.625534 | 0.000106 | hypermethylated |
| cg04492228 | 0.36905 | 0.569352432 | 0.625506 | 0.00024  | hypermethylated |
| cg04996195 | 0.32829 | 0.506456757 | 0.625468 | 0.000613 | hypermethylated |
| cg16790847 | 0.3088  | 0.476268108 | 0.625101 | 2.85E-05 | hypermethylated |
| cg23372684 | 0.34039 | 0.524942162 | 0.62497  | 7.93E-06 | hypermethylated |
| cg16890796 | 0.28327 | 0.436795135 | 0.624779 | 0.000219 | hypermethylated |
| cg21544633 | 0.21048 | 0.324528649 | 0.624663 | 0.000534 | hypermethylated |
| cg00713567 | 0.27055 | 0.417135135 | 0.62462  | 0.000234 | hypermethylated |
| cg17038626 | 0.55718 | 0.859056757 | 0.62461  | 0.000557 | hypermethylated |
| cg16406892 | 0.3741  | 0.576784865 | 0.624609 | 0.000342 | hypermethylated |
| cg05977669 | 0.30791 | 0.47463027  | 0.624295 | 0.000174 | hypermethylated |



|            |         |             |          |          |                 |
|------------|---------|-------------|----------|----------|-----------------|
| cg03169508 | 0.29861 | 0.460242162 | 0.624131 | 0.000148 | hypermethylated |
| cg11108474 | 0.30393 | 0.468395676 | 0.623989 | 0.000104 | hypermethylated |
| cg14118850 | 0.33051 | 0.509343243 | 0.623944 | 0.005223 | hypermethylated |
| cg16361966 | 0.22003 | 0.339034595 | 0.623732 | 0.000113 | hypermethylated |
| cg25649641 | 0.27598 | 0.425142162 | 0.623382 | 0.000143 | hypermethylated |
| cg12299795 | 0.46159 | 0.711032432 | 0.623303 | 0.005508 | hypermethylated |
| cg00699219 | 0.2759  | 0.424957838 | 0.623174 | 9.31E-06 | hypermethylated |
| cg10640072 | 0.32816 | 0.505404865 | 0.62304  | 2.57E-05 | hypermethylated |
| cg11762968 | 0.28796 | 0.443317838 | 0.622473 | 2.45E-05 | hypermethylated |
| cg02851062 | 0.28087 | 0.432378378 | 0.622392 | 2.61E-05 | hypermethylated |
| cg22583148 | 0.31666 | 0.487267027 | 0.621778 | 5.32E-05 | hypermethylated |
| cg18998365 | 0.31124 | 0.478839459 | 0.621515 | 0.002599 | hypermethylated |
| cg10116505 | 0.25342 | 0.389854595 | 0.621406 | 5.28E-06 | hypermethylated |
| cg05967403 | 0.29987 | 0.461251351 | 0.621216 | 5.19E-05 | hypermethylated |
| cg03322353 | 0.42869 | 0.659364324 | 0.621141 | 0.00134  | hypermethylated |
| cg19810034 | 0.21798 | 0.335262703 | 0.621096 | 9.19E-06 | hypermethylated |
| cg23082862 | 0.31128 | 0.478565405 | 0.620503 | 2.21E-05 | hypermethylated |
| cg06488256 | 0.30379 | 0.467009189 | 0.620377 | 0.000102 | hypermethylated |
| cg22400015 | 0.34056 | 0.523518378 | 0.620331 | 2.53E-06 | hypermethylated |
| cg11739633 | 0.37018 | 0.568990811 | 0.620178 | 3.57E-05 | hypermethylated |
| cg00287096 | 0.38117 | 0.585876216 | 0.620161 | 0.00028  | hypermethylated |
| cg04096767 | 0.29271 | 0.449854054 | 0.619985 | 0.000155 | hypermethylated |
| cg00805880 | 0.32837 | 0.504653514 | 0.619971 | 0.000374 | hypermethylated |
| cg03032025 | 0.45185 | 0.694399459 | 0.619922 | 0.002965 | hypermethylated |
| cg02154345 | 0.28992 | 0.445509189 | 0.6198   | 0.000229 | hypermethylated |
| cg15265085 | 0.37272 | 0.572685946 | 0.619652 | 0.002066 | hypermethylated |
| cg10257302 | 0.37236 | 0.572091892 | 0.619549 | 0.000501 | hypermethylated |
| cg19514381 | 0.35081 | 0.538784324 | 0.619018 | 5.86E-05 | hypermethylated |
| cg19718563 | 0.39918 | 0.613008649 | 0.618868 | 0.000219 | hypermethylated |
| cg03613782 | 0.28547 | 0.438198919 | 0.618247 | 4.94E-05 | hypermethylated |
| cg06897145 | 0.26351 | 0.404447027 | 0.618093 | 1.42E-05 | hypermethylated |
| cg03522150 | 0.50572 | 0.776168108 | 0.61803  | 0.010211 | hypermethylated |
| cg05543520 | 0.39981 | 0.61360973  | 0.618007 | 0.000741 | hypermethylated |
| cg01462607 | 0.28375 | 0.435435676 | 0.617839 | 0.000399 | hypermethylated |
| cg03431741 | 0.29179 | 0.447686486 | 0.617558 | 5.38E-05 | hypermethylated |
| cg21436572 | 0.36097 | 0.553791351 | 0.617464 | 0.00102  | hypermethylated |
| cg03877332 | 0.29961 | 0.459613514 | 0.617335 | 1.46E-05 | hypermethylated |
| cg19274703 | 0.34244 | 0.525216216 | 0.61706  | 0.001164 | hypermethylated |
| cg03405909 | 0.38063 | 0.583688108 | 0.616808 | 0.000256 | hypermethylated |
| cg15461491 | 0.22364 | 0.342896757 | 0.616596 | 2.07E-05 | hypermethylated |
| cg17371334 | 0.28249 | 0.433056216 | 0.616355 | 7.47E-05 | hypermethylated |
| cg08146945 | 0.34779 | 0.533122703 | 0.616251 | 1.54E-05 | hypermethylated |
| cg07459170 | 0.25916 | 0.397228649 | 0.616127 | 5.06E-05 | hypermethylated |
| cg01105418 | 0.41532 | 0.636506486 | 0.615952 | 0.002274 | hypermethylated |
| cg03707183 | 0.25678 | 0.393525405 | 0.615924 | 0.000426 | hypermethylated |
| cg05524354 | 0.43879 | 0.672353514 | 0.615689 | 2.78E-05 | hypermethylated |
| cg05258736 | 0.23929 | 0.366642703 | 0.615615 | 3.36E-05 | hypermethylated |
| cg08750504 | 0.33431 | 0.512218919 | 0.615574 | 0.000107 | hypermethylated |
| cg10038618 | 0.31109 | 0.476615135 | 0.615493 | 5.31E-05 | hypermethylated |
| cg00766964 | 0.4166  | 0.638241081 | 0.615439 | 0.003571 | hypermethylated |
| cg14277923 | 0.28126 | 0.430714595 | 0.614828 | 0.00102  | hypermethylated |
| cg14640592 | 0.3362  | 0.514834054 | 0.614788 | 2.30E-05 | hypermethylated |
| cg08732659 | 0.29897 | 0.45782     | 0.61478  | 4.01E-06 | hypermethylated |
| cg25785397 | 0.28933 | 0.44294973  | 0.614427 | 0.000132 | hypermethylated |
| cg16758800 | 0.25818 | 0.395138919 | 0.613983 | 2.10E-05 | hypermethylated |
| cg24519147 | 0.36965 | 0.565684865 | 0.613839 | 8.03E-05 | hypermethylated |
| cg13925360 | 0.24782 | 0.37921027  | 0.613705 | 9.95E-05 | hypermethylated |
| cg23662142 | 0.36191 | 0.553756757 | 0.613621 | 0.000335 | hypermethylated |

|            |         |             |          |          |                 |
|------------|---------|-------------|----------|----------|-----------------|
| cg13524919 | 0.33052 | 0.505715135 | 0.613587 | 5.06E-05 | hypermethylated |
| cg13412754 | 0.37627 | 0.575659459 | 0.613447 | 0.021224 | hypermethylated |
| cg13327545 | 0.36188 | 0.553595135 | 0.61332  | 1.99E-05 | hypermethylated |
| cg09828714 | 0.32118 | 0.491331351 | 0.613314 | 0.000214 | hypermethylated |
| cg10556005 | 0.51123 | 0.782015135 | 0.613224 | 0.001635 | hypermethylated |
| cg13297560 | 0.3899  | 0.596416216 | 0.613215 | 0.010211 | hypermethylated |
| cg23098195 | 0.26375 | 0.403382703 | 0.612978 | 2.45E-05 | hypermethylated |
| cg23347399 | 0.35979 | 0.550263784 | 0.612968 | 0.00064  | hypermethylated |
| cg00646347 | 0.34186 | 0.52264973  | 0.612439 | 4.15E-05 | hypermethylated |
| cg18449120 | 0.34827 | 0.532387568 | 0.612271 | 1.58E-05 | hypermethylated |
| cg02328239 | 0.23741 | 0.362894054 | 0.612168 | 3.57E-05 | hypermethylated |
| cg23178550 | 0.36788 | 0.562085946 | 0.611555 | 3.23E-05 | hypermethylated |
| cg22655696 | 0.3212  | 0.490728108 | 0.611452 | 1.80E-05 | hypermethylated |
| cg04908960 | 0.55494 | 0.847675135 | 0.61118  | 0.000408 | hypermethylated |
| cg04890851 | 0.29354 | 0.448373514 | 0.611144 | 5.45E-05 | hypermethylated |
| cg23368787 | 0.34156 | 0.521542703 | 0.610646 | 2.38E-05 | hypermethylated |
| cg01097180 | 0.28349 | 0.432860541 | 0.610604 | 0.000107 | hypermethylated |
| cg18747039 | 0.24603 | 0.375662703 | 0.610604 | 5.58E-05 | hypermethylated |
| cg27639662 | 0.31544 | 0.481574595 | 0.610394 | 0.000287 | hypermethylated |
| cg16175941 | 0.51674 | 0.788689189 | 0.610018 | 0.005706 | hypermethylated |
| cg11100804 | 0.38819 | 0.592462703 | 0.609961 | 3.07E-05 | hypermethylated |
| cg01525538 | 0.38341 | 0.585121081 | 0.609847 | 6.39E-06 | hypermethylated |
| cg15117739 | 0.24767 | 0.377898378 | 0.609579 | 0.002856 | hypermethylated |
| cg01178680 | 0.36157 | 0.551670811 | 0.609533 | 7.62E-06 | hypermethylated |
| cg01798261 | 0.31663 | 0.483044324 | 0.609358 | 4.36E-05 | hypermethylated |
| cg22353551 | 0.33007 | 0.503534595 | 0.609319 | 2.27E-05 | hypermethylated |
| cg08874609 | 0.26046 | 0.397325946 | 0.609261 | 0.000168 | hypermethylated |
| cg09155881 | 0.37597 | 0.573392973 | 0.608907 | 0.002026 | hypermethylated |
| cg09312576 | 0.27607 | 0.420939459 | 0.608579 | 1.54E-05 | hypermethylated |
| cg21676440 | 0.53771 | 0.819871351 | 0.608569 | 0.00096  | hypermethylated |
| cg16184803 | 0.27641 | 0.421434054 | 0.608497 | 4.15E-05 | hypermethylated |
| cg17298751 | 0.44556 | 0.679183784 | 0.608182 | 3.21E-06 | hypermethylated |
| cg19764418 | 0.44088 | 0.671877838 | 0.607813 | 0.000445 | hypermethylated |
| cg19802138 | 0.27073 | 0.412541622 | 0.607685 | 4.82E-05 | hypermethylated |
| cg12069267 | 0.39652 | 0.604205405 | 0.607645 | 2.89E-05 | hypermethylated |
| cg01971160 | 0.28675 | 0.436836757 | 0.607301 | 0.000112 | hypermethylated |
| cg16026922 | 0.27846 | 0.4242      | 0.607275 | 0.000129 | hypermethylated |
| cg00816406 | 0.39449 | 0.600815135 | 0.606932 | 0.011649 | hypermethylated |
| cg02105152 | 0.25856 | 0.393584324 | 0.606174 | 8.63E-05 | hypermethylated |
| cg18452695 | 0.38891 | 0.591801081 | 0.605676 | 0.000191 | hypermethylated |
| cg12490835 | 0.28939 | 0.440351351 | 0.60564  | 0.000129 | hypermethylated |
| cg14476101 | 0.39913 | 0.607297297 | 0.605544 | 0.000501 | hypermethylated |
| cg21102121 | 0.3449  | 0.524743784 | 0.605435 | 7.47E-05 | hypermethylated |
| cg18757468 | 0.4691  | 0.713630811 | 0.605282 | 0.002253 | hypermethylated |
| cg15895690 | 0.28156 | 0.428241081 | 0.604981 | 1.01E-05 | hypermethylated |
| cg10297792 | 0.39135 | 0.595115676 | 0.604711 | 0.000358 | hypermethylated |
| cg25936177 | 0.28127 | 0.427711351 | 0.604682 | 1.02E-05 | hypermethylated |
| cg09606807 | 0.40653 | 0.618129189 | 0.604547 | 8.63E-05 | hypermethylated |
| cg09183671 | 0.36447 | 0.554111892 | 0.604377 | 0.00071  | hypermethylated |
| cg08082810 | 0.33479 | 0.508942162 | 0.604245 | 5.65E-05 | hypermethylated |
| cg08650890 | 0.34835 | 0.529531892 | 0.60418  | 0.001949 | hypermethylated |
| cg05238917 | 0.31758 | 0.482715676 | 0.604054 | 0.000178 | hypermethylated |
| cg16822666 | 0.38723 | 0.588542703 | 0.603956 | 0.000893 | hypermethylated |
| cg09254980 | 0.22418 | 0.340671892 | 0.603725 | 1.64E-05 | hypermethylated |
| cg20702419 | 0.26951 | 0.409542162 | 0.603673 | 0.000449 | hypermethylated |
| cg07742404 | 0.29444 | 0.447386486 | 0.603548 | 6.54E-05 | hypermethylated |
| cg05046306 | 0.36609 | 0.55624     | 0.603509 | 0.004951 | hypermethylated |
| cg21476494 | 0.33859 | 0.514435676 | 0.603451 | 0.000594 | hypermethylated |

|            |         |             |          |          |                 |
|------------|---------|-------------|----------|----------|-----------------|
| cg05875410 | 0.31486 | 0.478378378 | 0.603442 | 0.00012  | hypermethylated |
| cg00222341 | 0.24987 | 0.379633514 | 0.60343  | 0.000116 | hypermethylated |
| cg22017213 | 0.2051  | 0.311547568 | 0.603125 | 0.002026 | hypermethylated |
| cg07587893 | 0.24048 | 0.365248649 | 0.602962 | 5.25E-05 | hypermethylated |
| cg19688403 | 0.25108 | 0.381281622 | 0.60271  | 5.06E-05 | hypermethylated |
| cg03497399 | 0.38373 | 0.582714595 | 0.602698 | 4.94E-05 | hypermethylated |
| cg07676002 | 0.29568 | 0.448976757 | 0.602604 | 2.45E-05 | hypermethylated |
| cg25497399 | 0.28421 | 0.431474595 | 0.602318 | 0.00035  | hypermethylated |
| cg22646995 | 0.26664 | 0.404667027 | 0.601842 | 0.000219 | hypermethylated |
| cg12243007 | 0.26696 | 0.405064324 | 0.601527 | 0.000338 | hypermethylated |
| cg02812891 | 0.37463 | 0.568385946 | 0.601404 | 0.000626 | hypermethylated |
| cg04386759 | 0.55033 | 0.834857297 | 0.601233 | 0.001684 | hypermethylated |
| cg19715094 | 0.40109 | 0.608456216 | 0.601227 | 0.004691 | hypermethylated |
| cg14468658 | 0.28252 | 0.428574595 | 0.601193 | 7.47E-05 | hypermethylated |
| cg05740045 | 0.3867  | 0.58644     | 0.600769 | 3.07E-05 | hypermethylated |
| cg18633154 | 0.3369  | 0.510899459 | 0.600719 | 0.016315 | hypermethylated |
| cg01278720 | 0.20652 | 0.313099459 | 0.60034  | 7.03E-05 | hypermethylated |
| cg27034935 | 0.33329 | 0.505252973 | 0.600228 | 0.000142 | hypermethylated |
| cg03472755 | 0.27393 | 0.415248649 | 0.600168 | 0.000191 | hypermethylated |
| cg06480171 | 0.28392 | 0.430381081 | 0.60013  | 0.000219 | hypermethylated |
| cg05349624 | 0.27481 | 0.416551892 | 0.600062 | 0.000191 | hypermethylated |
| cg18313661 | 0.38602 | 0.585082162 | 0.599964 | 0.000116 | hypermethylated |
| cg12052661 | 0.323   | 0.489488108 | 0.59974  | 1.31E-05 | hypermethylated |
| cg20948486 | 0.27835 | 0.421809189 | 0.59969  | 0.000626 | hypermethylated |
| cg19016652 | 0.34549 | 0.523538378 | 0.599651 | 3.23E-05 | hypermethylated |
| cg05781417 | 0.25433 | 0.385314595 | 0.599335 | 0.001803 | hypermethylated |
| cg23832237 | 0.30539 | 0.462604865 | 0.599128 | 5.72E-05 | hypermethylated |
| cg08520746 | 0.24976 | 0.378334595 | 0.59912  | 5.65E-05 | hypermethylated |
| cg05886546 | 0.29741 | 0.45051027  | 0.599107 | 0.000159 | hypermethylated |
| cg27213509 | 0.24885 | 0.376943784 | 0.599073 | 1.04E-05 | hypermethylated |
| cg26046467 | 0.37321 | 0.565124324 | 0.598581 | 1.54E-05 | hypermethylated |
| cg00273449 | 0.26274 | 0.397840541 | 0.598554 | 4.70E-05 | hypermethylated |
| cg00637144 | 0.35433 | 0.536492973 | 0.598466 | 0.00064  | hypermethylated |
| cg25859099 | 0.33497 | 0.507049189 | 0.598094 | 3.57E-05 | hypermethylated |
| cg25390440 | 0.32982 | 0.499128108 | 0.597731 | 7.29E-05 | hypermethylated |
| cg02438611 | 0.43712 | 0.661394595 | 0.597482 | 0.000126 | hypermethylated |
| cg15160709 | 0.47387 | 0.716936757 | 0.597355 | 0.000857 | hypermethylated |
| cg21837669 | 0.27703 | 0.419103784 | 0.597265 | 0.000283 | hypermethylated |
| cg19430694 | 0.22533 | 0.340887027 | 0.597254 | 0.005606 | hypermethylated |
| cg20689135 | 0.30279 | 0.458043784 | 0.597168 | 0.0003   | hypermethylated |
| cg17448336 | 0.37176 | 0.562343784 | 0.597081 | 3.23E-05 | hypermethylated |
| cg14585371 | 0.27322 | 0.413273514 | 0.597034 | 2.95E-06 | hypermethylated |
| cg04407305 | 0.26837 | 0.405925946 | 0.596993 | 7.29E-05 | hypermethylated |
| cg18348836 | 0.46199 | 0.698692973 | 0.596797 | 0.01274  | hypermethylated |
| cg25079691 | 0.249   | 0.376544324 | 0.596674 | 0.000142 | hypermethylated |
| cg26562772 | 0.41013 | 0.620194595 | 0.59664  | 0.007408 | hypermethylated |
| cg03283421 | 0.55052 | 0.832479459 | 0.59662  | 0.000445 | hypermethylated |
| cg19527617 | 0.24584 | 0.371736216 | 0.59656  | 0.000296 | hypermethylated |
| cg04854226 | 0.38415 | 0.580865405 | 0.596534 | 0.000435 | hypermethylated |
| cg09998861 | 0.30831 | 0.466188108 | 0.596531 | 0.000145 | hypermethylated |
| cg07018577 | 0.54103 | 0.817955135 | 0.596313 | 0.004649 | hypermethylated |
| cg11793699 | 0.42501 | 0.642521081 | 0.596247 | 0.000772 | hypermethylated |
| cg26516532 | 0.30551 | 0.461776757 | 0.595976 | 0.000113 | hypermethylated |
| cg16376108 | 0.23996 | 0.362688649 | 0.595938 | 1.71E-05 | hypermethylated |
| cg06275642 | 0.26357 | 0.398189189 | 0.595268 | 0.00032  | hypermethylated |
| cg10595952 | 0.46281 | 0.699178919 | 0.595242 | 0.003078 | hypermethylated |
| cg10261191 | 0.34839 | 0.526318378 | 0.595233 | 0.000229 | hypermethylated |
| cg12534424 | 0.29287 | 0.442429189 | 0.595186 | 0.000189 | hypermethylated |

|            |         |             |          |          |                 |
|------------|---------|-------------|----------|----------|-----------------|
| cg06794543 | 0.44925 | 0.678653514 | 0.595157 | 2.54E-05 | hypermethylated |
| cg10989634 | 0.24407 | 0.368666486 | 0.595021 | 2.85E-05 | hypermethylated |
| cg02331262 | 0.44228 | 0.66801027  | 0.59491  | 0.000313 | hypermethylated |
| cg13301003 | 0.37487 | 0.566164324 | 0.59483  | 0.000138 | hypermethylated |
| cg02229261 | 0.30832 | 0.465532432 | 0.594453 | 0.000741 | hypermethylated |
| cg09692428 | 0.42411 | 0.640358378 | 0.594441 | 0.000563 | hypermethylated |
| cg15959252 | 0.40528 | 0.611905946 | 0.594391 | 0.000607 | hypermethylated |
| cg19696083 | 0.3081  | 0.465018378 | 0.593889 | 0.000176 | hypermethylated |
| cg08682532 | 0.33913 | 0.511796757 | 0.593733 | 0.000132 | hypermethylated |
| cg10848373 | 0.32366 | 0.488425405 | 0.593659 | 0.00071  | hypermethylated |
| cg04845915 | 0.40152 | 0.605917838 | 0.59365  | 9.57E-06 | hypermethylated |
| cg13419986 | 0.26832 | 0.404896216 | 0.593598 | 0.00054  | hypermethylated |
| cg11468819 | 0.31014 | 0.467931892 | 0.593379 | 0.000232 | hypermethylated |
| cg13578194 | 0.25158 | 0.379561081 | 0.593315 | 0.006339 | hypermethylated |
| cg04570362 | 0.51495 | 0.776816757 | 0.593142 | 0.009394 | hypermethylated |
| cg22830707 | 0.2617  | 0.39474973  | 0.593024 | 2.89E-05 | hypermethylated |
| cg22108567 | 0.32341 | 0.487827568 | 0.593007 | 0.000756 | hypermethylated |
| cg02047300 | 0.37653 | 0.567931892 | 0.592953 | 1.04E-05 | hypermethylated |
| cg17432857 | 0.3872  | 0.584017297 | 0.592932 | 0.001052 | hypermethylated |
| cg09578568 | 0.29758 | 0.448787568 | 0.592755 | 1.35E-05 | hypermethylated |
| cg01261206 | 0.53101 | 0.800601622 | 0.592346 | 0.001839 | hypermethylated |
| cg21123355 | 0.24211 | 0.365024865 | 0.592332 | 0.000112 | hypermethylated |
| cg07546139 | 0.40787 | 0.614917297 | 0.592283 | 0.000495 | hypermethylated |
| cg24427376 | 0.30168 | 0.454788649 | 0.592177 | 0.000327 | hypermethylated |
| cg24024424 | 0.2838  | 0.427742703 | 0.591869 | 0.000148 | hypermethylated |
| cg00342530 | 0.34035 | 0.512974595 | 0.591868 | 0.006122 | hypermethylated |
| cg06368300 | 0.20284 | 0.305716757 | 0.591853 | 0.003021 | hypermethylated |
| cg22902505 | 0.34822 | 0.524777838 | 0.591708 | 0.001041 | hypermethylated |
| cg26006951 | 0.26783 | 0.403537297 | 0.591384 | 0.000756 | hypermethylated |
| cg03700287 | 0.2951  | 0.444583243 | 0.59125  | 9.49E-05 | hypermethylated |
| cg03769116 | 0.46552 | 0.701279459 | 0.591146 | 0.000115 | hypermethylated |
| cg15751116 | 0.27668 | 0.41673027  | 0.590896 | 0.000501 | hypermethylated |
| cg10026317 | 0.3514  | 0.529261622 | 0.590867 | 3.19E-05 | hypermethylated |
| cg25066972 | 0.4792  | 0.721698378 | 0.590768 | 0.002007 | hypermethylated |
| cg06547490 | 0.24259 | 0.365305405 | 0.590583 | 0.010468 | hypermethylated |
| cg19956914 | 0.27372 | 0.412168649 | 0.590534 | 0.001603 | hypermethylated |
| cg15123428 | 0.38311 | 0.576798919 | 0.59031  | 0.006975 | hypermethylated |
| cg15084803 | 0.35596 | 0.535865405 | 0.590156 | 0.001734 | hypermethylated |
| cg22185643 | 0.27698 | 0.416965405 | 0.590146 | 4.15E-05 | hypermethylated |
| cg11751117 | 0.52217 | 0.785932973 | 0.589887 | 0.00099  | hypermethylated |
| cg06882544 | 0.29683 | 0.446704865 | 0.589685 | 9.57E-06 | hypermethylated |
| cg00595030 | 0.31878 | 0.479736216 | 0.58968  | 6.38E-05 | hypermethylated |
| cg24092282 | 0.31782 | 0.478280541 | 0.589647 | 0.00032  | hypermethylated |
| cg20450471 | 0.32898 | 0.495047568 | 0.589567 | 2.92E-05 | hypermethylated |
| cg07892597 | 0.34201 | 0.514644865 | 0.589539 | 1.84E-05 | hypermethylated |
| cg05722504 | 0.28057 | 0.422167568 | 0.589455 | 3.40E-05 | hypermethylated |
| cg09271157 | 0.29207 | 0.439464865 | 0.589434 | 0.000112 | hypermethylated |
| cg06193628 | 0.39414 | 0.593022703 | 0.589379 | 0.001875 | hypermethylated |
| cg10169241 | 0.34212 | 0.514711892 | 0.589263 | 0.000626 | hypermethylated |
| cg01159576 | 0.2461  | 0.370177297 | 0.588972 | 0.000268 | hypermethylated |
| cg26811372 | 0.34663 | 0.52137027  | 0.588912 | 0.0006   | hypermethylated |
| cg02311725 | 0.29733 | 0.447188108 | 0.588817 | 6.57E-06 | hypermethylated |
| cg24932585 | 0.34721 | 0.522174054 | 0.588722 | 9.49E-05 | hypermethylated |
| cg08178786 | 0.32325 | 0.48601027  | 0.588336 | 0.000253 | hypermethylated |
| cg24330379 | 0.25587 | 0.384688108 | 0.588278 | 0.000839 | hypermethylated |
| cg24459147 | 0.2343  | 0.352207568 | 0.588069 | 2.39E-05 | hypermethylated |
| cg22927247 | 0.30853 | 0.463767568 | 0.587991 | 4.86E-06 | hypermethylated |
| cg19633390 | 0.49925 | 0.75039027  | 0.587879 | 0.000399 | hypermethylated |

|            |         |             |          |          |                 |
|------------|---------|-------------|----------|----------|-----------------|
| cg05239225 | 0.35561 | 0.53447027  | 0.587814 | 0.006737 | hypermethylated |
| cg14042889 | 0.38189 | 0.573964865 | 0.587805 | 0.003255 | hypermethylated |
| cg09416908 | 0.47385 | 0.712151351 | 0.587753 | 0.000358 | hypermethylated |
| cg26819611 | 0.21219 | 0.318853514 | 0.587537 | 0.000417 | hypermethylated |
| cg06898293 | 0.43659 | 0.656029189 | 0.587481 | 0.004059 | hypermethylated |
| cg04191300 | 0.40447 | 0.607745405 | 0.587434 | 0.002409 | hypermethylated |
| cg13661519 | 0.3691  | 0.554509189 | 0.5872   | 0.002699 | hypermethylated |
| cg10432422 | 0.30061 | 0.45158973  | 0.58712  | 5.86E-05 | hypermethylated |
| cg25027788 | 0.31552 | 0.473951351 | 0.587008 | 0.00513  | hypermethylated |
| cg12334871 | 0.52811 | 0.793206486 | 0.586858 | 0.000626 | hypermethylated |
| cg04578903 | 0.305   | 0.457903784 | 0.586235 | 0.000129 | hypermethylated |
| cg00154357 | 0.35968 | 0.539942703 | 0.586092 | 1.71E-05 | hypermethylated |
| cg06222162 | 0.25684 | 0.385537297 | 0.586001 | 0.002106 | hypermethylated |
| cg15400629 | 0.3052  | 0.458052432 | 0.585758 | 4.58E-05 | hypermethylated |
| cg06219103 | 0.4983  | 0.747834595 | 0.585705 | 1.09E-05 | hypermethylated |
| cg08244443 | 0.32882 | 0.493255135 | 0.585036 | 2.85E-05 | hypermethylated |
| cg17455088 | 0.32524 | 0.48784973  | 0.584932 | 8.42E-05 | hypermethylated |
| cg14742809 | 0.3136  | 0.470376216 | 0.58489  | 0.000613 | hypermethylated |
| cg19103219 | 0.35323 | 0.52978     | 0.584786 | 0.004951 | hypermethylated |
| cg07539798 | 0.36469 | 0.546884865 | 0.584566 | 0.000204 | hypermethylated |
| cg07815521 | 0.28936 | 0.433902162 | 0.584504 | 0.003195 | hypermethylated |
| cg18839637 | 0.32995 | 0.494751351 | 0.584456 | 3.07E-05 | hypermethylated |
| cg11375458 | 0.40727 | 0.610682703 | 0.584437 | 4.58E-05 | hypermethylated |
| cg00651488 | 0.4018  | 0.602457297 | 0.584381 | 0.000274 | hypermethylated |
| cg20016411 | 0.27643 | 0.414474054 | 0.584368 | 2.51E-05 | hypermethylated |
| cg13452162 | 0.32884 | 0.492982703 | 0.584151 | 0.001768 | hypermethylated |
| cg12836958 | 0.45662 | 0.684492973 | 0.584042 | 0.002856 | hypermethylated |
| cg15677916 | 0.26088 | 0.390974054 | 0.583687 | 9.27E-05 | hypermethylated |
| cg24483493 | 0.40472 | 0.606505405 | 0.583596 | 0.008348 | hypermethylated |
| cg13826452 | 0.32957 | 0.493837297 | 0.583451 | 0.000132 | hypermethylated |
| cg01603559 | 0.22398 | 0.335604865 | 0.583394 | 0.000474 | hypermethylated |
| cg00558689 | 0.38871 | 0.582381081 | 0.583269 | 0.001571 | hypermethylated |
| cg18141888 | 0.36736 | 0.55032973  | 0.583102 | 3.95E-05 | hypermethylated |
| cg12417775 | 0.4202  | 0.629456216 | 0.58303  | 0.000335 | hypermethylated |
| cg20996351 | 0.33807 | 0.506366486 | 0.58286  | 4.82E-05 | hypermethylated |
| cg21542793 | 0.22785 | 0.341235676 | 0.582684 | 0.000104 | hypermethylated |
| cg25664813 | 0.52712 | 0.789422703 | 0.582667 | 0.00134  | hypermethylated |
| cg11555228 | 0.28951 | 0.433519459 | 0.582484 | 1.84E-05 | hypermethylated |
| cg08823554 | 0.56997 | 0.853435676 | 0.582396 | 0.000262 | hypermethylated |
| cg01814898 | 0.55089 | 0.824851892 | 0.582371 | 0.003136 | hypermethylated |
| cg24076884 | 0.28702 | 0.429715135 | 0.582229 | 4.70E-05 | hypermethylated |
| cg04603391 | 0.38321 | 0.573721081 | 0.582214 | 0.000166 | hypermethylated |
| cg07766263 | 0.33406 | 0.500089189 | 0.582078 | 7.65E-05 | hypermethylated |
| cg15260428 | 0.58818 | 0.880381081 | 0.58187  | 4.15E-05 | hypermethylated |
| cg15792134 | 0.46889 | 0.701775135 | 0.581759 | 0.028186 | hypermethylated |
| cg06971092 | 0.34091 | 0.510206486 | 0.58169  | 0.000293 | hypermethylated |
| cg15291243 | 0.31278 | 0.468095135 | 0.581654 | 0.000101 | hypermethylated |
| cg21826699 | 0.31278 | 0.468011892 | 0.581397 | 0.000224 | hypermethylated |
| cg12530503 | 0.30212 | 0.452046486 | 0.581349 | 3.44E-05 | hypermethylated |
| cg09601584 | 0.2451  | 0.366725405 | 0.58133  | 7.12E-05 | hypermethylated |
| cg25902889 | 0.47109 | 0.704829189 | 0.581271 | 0.002106 | hypermethylated |
| cg14914238 | 0.45056 | 0.673933514 | 0.580887 | 0.003506 | hypermethylated |
| cg06816350 | 0.46199 | 0.690999459 | 0.580823 | 0.004691 | hypermethylated |
| cg04726439 | 0.32702 | 0.489098919 | 0.580747 | 3.07E-05 | hypermethylated |
| cg13333954 | 0.3574  | 0.534527568 | 0.580725 | 0.000256 | hypermethylated |
| cg27344587 | 0.34747 | 0.519653514 | 0.580662 | 0.00018  | hypermethylated |
| cg01295399 | 0.3387  | 0.506523243 | 0.58062  | 5.45E-05 | hypermethylated |
| cg01794802 | 0.45141 | 0.67500973  | 0.58047  | 0.002189 | hypermethylated |

|            |         |             |          |          |                 |
|------------|---------|-------------|----------|----------|-----------------|
| cg06536868 | 0.37863 | 0.566166486 | 0.580438 | 0.000511 | hypermethylated |
| cg17489908 | 0.38751 | 0.579208108 | 0.579848 | 0.000338 | hypermethylated |
| cg22134325 | 0.33336 | 0.498204324 | 0.579657 | 1.80E-05 | hypermethylated |
| cg10612492 | 0.24802 | 0.370625405 | 0.579505 | 0.004526 | hypermethylated |
| cg13313813 | 0.28779 | 0.430023243 | 0.579398 | 1.87E-05 | hypermethylated |
| cg26708874 | 0.30668 | 0.458190811 | 0.579214 | 0.000107 | hypermethylated |
| cg13102348 | 0.32357 | 0.48342     | 0.579199 | 0.009315 | hypermethylated |
| cg16572603 | 0.31811 | 0.475246486 | 0.57915  | 2.71E-05 | hypermethylated |
| cg08812889 | 0.36422 | 0.544122162 | 0.57912  | 7.38E-05 | hypermethylated |
| cg14974749 | 0.44668 | 0.667150811 | 0.578771 | 0.005963 | hypermethylated |
| cg14645017 | 0.38795 | 0.579152432 | 0.578072 | 0.004776 | hypermethylated |
| cg13565138 | 0.35342 | 0.527590811 | 0.578036 | 0.001314 | hypermethylated |
| cg22063654 | 0.33795 | 0.504495676 | 0.578032 | 0.000646 | hypermethylated |
| cg05561193 | 0.35495 | 0.529853514 | 0.577978 | 0.002147 | hypermethylated |
| cg15268244 | 0.2227  | 0.332383784 | 0.577748 | 0.001141 | hypermethylated |
| cg09144707 | 0.29933 | 0.446737297 | 0.57769  | 7.12E-05 | hypermethylated |
| cg05337753 | 0.50528 | 0.754098919 | 0.577671 | 0.000653 | hypermethylated |
| cg16387467 | 0.33499 | 0.499917297 | 0.577571 | 3.90E-05 | hypermethylated |
| cg18793404 | 0.33942 | 0.506417297 | 0.577255 | 8.63E-05 | hypermethylated |
| cg18891762 | 0.28463 | 0.424635135 | 0.577136 | 0.000327 | hypermethylated |
| cg07453407 | 0.54354 | 0.810556757 | 0.576527 | 0.002363 | hypermethylated |
| cg01432663 | 0.34536 | 0.514952973 | 0.57634  | 0.003225 | hypermethylated |
| cg00380860 | 0.25896 | 0.386081622 | 0.576177 | 0.000303 | hypermethylated |
| cg19536929 | 0.35444 | 0.528391892 | 0.576067 | 7.84E-05 | hypermethylated |
| cg01178099 | 0.37487 | 0.558815135 | 0.575981 | 0.000733 | hypermethylated |
| cg03296797 | 0.32236 | 0.480498378 | 0.575859 | 8.84E-05 | hypermethylated |
| cg21838979 | 0.29577 | 0.440811892 | 0.575687 | 2.21E-05 | hypermethylated |
| cg10471743 | 0.46707 | 0.696073514 | 0.575601 | 0.000253 | hypermethylated |
| cg16824643 | 0.49989 | 0.744957838 | 0.575548 | 0.000178 | hypermethylated |
| cg00854273 | 0.38022 | 0.566612973 | 0.575529 | 0.000274 | hypermethylated |
| cg21092551 | 0.53874 | 0.80283027  | 0.575506 | 0.004287 | hypermethylated |
| cg24395452 | 0.34313 | 0.511275135 | 0.575345 | 1.28E-05 | hypermethylated |
| cg01628509 | 0.24669 | 0.367563784 | 0.575295 | 0.000378 | hypermethylated |
| cg12668523 | 0.48591 | 0.723918919 | 0.575139 | 0.00546  | hypermethylated |
| cg22010052 | 0.30573 | 0.45534973  | 0.574717 | 8.22E-05 | hypermethylated |
| cg04071270 | 0.47344 | 0.705131351 | 0.57471  | 5.72E-05 | hypermethylated |
| cg27496615 | 0.30445 | 0.45336     | 0.574452 | 7.74E-05 | hypermethylated |
| cg00969405 | 0.43534 | 0.648258378 | 0.574426 | 0.001452 | hypermethylated |
| cg07547549 | 0.36497 | 0.54344     | 0.574343 | 0.000335 | hypermethylated |
| cg01224715 | 0.4374  | 0.651207568 | 0.574164 | 0.000112 | hypermethylated |
| cg16817992 | 0.35298 | 0.525508649 | 0.574128 | 3.49E-05 | hypermethylated |
| cg17520027 | 0.34125 | 0.508007568 | 0.574021 | 0.001949 | hypermethylated |
| cg13725172 | 0.37514 | 0.558443784 | 0.573983 | 0.0017   | hypermethylated |
| cg00929376 | 0.33049 | 0.491916216 | 0.573806 | 0.003473 | hypermethylated |
| cg20706778 | 0.37176 | 0.553343243 | 0.573803 | 0.002274 | hypermethylated |
| cg25666233 | 0.36436 | 0.542198919 | 0.573458 | 0.000178 | hypermethylated |
| cg14164099 | 0.33593 | 0.499871892 | 0.573398 | 0.000805 | hypermethylated |
| cg03989260 | 0.26861 | 0.399652973 | 0.573235 | 2.21E-05 | hypermethylated |
| cg21581504 | 0.37407 | 0.556514595 | 0.573111 | 0.000764 | hypermethylated |
| cg04007726 | 0.40526 | 0.602915676 | 0.573108 | 0.0012   | hypermethylated |
| cg05150023 | 0.29345 | 0.436502162 | 0.572874 | 8.22E-05 | hypermethylated |
| cg02111951 | 0.34987 | 0.52033027  | 0.572609 | 9.07E-06 | hypermethylated |
| cg07332002 | 0.25041 | 0.372391892 | 0.572529 | 0.00035  | hypermethylated |
| cg00510437 | 0.39423 | 0.586067568 | 0.572029 | 3.67E-05 | hypermethylated |
| cg24139639 | 0.32573 | 0.484131351 | 0.571722 | 2.42E-05 | hypermethylated |
| cg19763863 | 0.32279 | 0.479754054 | 0.571699 | 0.001684 | hypermethylated |
| cg02034887 | 0.37816 | 0.562023784 | 0.571634 | 0.01146  | hypermethylated |
| cg01579600 | 0.36528 | 0.542776757 | 0.571356 | 0.005223 | hypermethylated |

|            |         |             |          |          |                 |
|------------|---------|-------------|----------|----------|-----------------|
| cg02905900 | 0.20568 | 0.30562     | 0.571337 | 0.000857 | hypermethylated |
| cg03970229 | 0.29416 | 0.437087027 | 0.571319 | 0.000123 | hypermethylated |
| cg24622589 | 0.3239  | 0.481224324 | 0.571161 | 0.012333 | hypermethylated |
| cg07482257 | 0.3702  | 0.550005946 | 0.571142 | 0.002189 | hypermethylated |
| cg01340163 | 0.34217 | 0.508313514 | 0.571005 | 4.82E-05 | hypermethylated |
| cg11728747 | 0.46984 | 0.697969189 | 0.570994 | 0.001327 | hypermethylated |
| cg02120584 | 0.32025 | 0.475678919 | 0.57079  | 0.000168 | hypermethylated |
| cg15986413 | 0.24866 | 0.369324865 | 0.570716 | 0.000172 | hypermethylated |
| cg10586870 | 0.2933  | 0.435598919 | 0.570623 | 0.002274 | hypermethylated |
| cg16926102 | 0.30572 | 0.453917838 | 0.57022  | 3.40E-05 | hypermethylated |
| cg26282731 | 0.47789 | 0.709541081 | 0.570208 | 0.00095  | hypermethylated |
| cg06493930 | 0.43929 | 0.652224865 | 0.570196 | 0.004951 | hypermethylated |
| cg10149054 | 0.29798 | 0.442415676 | 0.570187 | 0.000163 | hypermethylated |
| cg12686273 | 0.35691 | 0.529794595 | 0.569873 | 3.76E-05 | hypermethylated |
| cg23095192 | 0.3056  | 0.453629189 | 0.569869 | 0.000342 | hypermethylated |
| cg10501976 | 0.36174 | 0.536951351 | 0.569838 | 4.76E-05 | hypermethylated |
| cg27051315 | 0.3027  | 0.449186486 | 0.569426 | 0.00035  | hypermethylated |
| cg22481263 | 0.33478 | 0.496789189 | 0.56942  | 7.93E-06 | hypermethylated |
| cg15011409 | 0.23735 | 0.352197297 | 0.569368 | 0.000426 | hypermethylated |
| cg05465604 | 0.2955  | 0.438406486 | 0.569111 | 0.000575 | hypermethylated |
| cg04043150 | 0.3093  | 0.458832973 | 0.568962 | 2.29E-06 | hypermethylated |
| cg03980550 | 0.32647 | 0.484273514 | 0.568872 | 0.008069 | hypermethylated |
| cg16463460 | 0.36105 | 0.535564865 | 0.568863 | 2.64E-05 | hypermethylated |
| cg23497569 | 0.42862 | 0.635774054 | 0.568815 | 0.019361 | hypermethylated |
| cg21099419 | 0.59108 | 0.876741622 | 0.568798 | 0.000256 | hypermethylated |
| cg09643136 | 0.35403 | 0.525122703 | 0.568783 | 3.07E-05 | hypermethylated |
| cg07503630 | 0.22764 | 0.337649189 | 0.568771 | 0.002478 | hypermethylated |
| cg25705519 | 0.3406  | 0.505181622 | 0.568724 | 0.000107 | hypermethylated |
| cg14509403 | 0.35722 | 0.529796216 | 0.568625 | 3.11E-05 | hypermethylated |
| cg24691891 | 0.39367 | 0.583801081 | 0.56849  | 0.003538 | hypermethylated |
| cg26092675 | 0.34356 | 0.509478378 | 0.568459 | 0.002699 | hypermethylated |
| cg03162823 | 0.40854 | 0.605765405 | 0.568282 | 0.001481 | hypermethylated |
| cg10531355 | 0.40693 | 0.603291351 | 0.568074 | 0.00024  | hypermethylated |
| cg00298065 | 0.41332 | 0.612717297 | 0.567962 | 7.84E-05 | hypermethylated |
| cg15887459 | 0.30646 | 0.454297297 | 0.567938 | 0.000221 | hypermethylated |
| cg25457886 | 0.36576 | 0.542176757 | 0.567866 | 0.000129 | hypermethylated |
| cg09764761 | 0.39691 | 0.58822     | 0.567544 | 0.0017   | hypermethylated |
| cg01020758 | 0.27846 | 0.412654054 | 0.567463 | 0.00099  | hypermethylated |
| cg12446629 | 0.26919 | 0.398839459 | 0.567183 | 7.12E-05 | hypermethylated |
| cg26406176 | 0.29595 | 0.438466486 | 0.567113 | 0.000421 | hypermethylated |
| cg11420883 | 0.28228 | 0.418201081 | 0.56707  | 0.000274 | hypermethylated |
| cg07540084 | 0.52075 | 0.771404865 | 0.566897 | 0.003316 | hypermethylated |
| cg11839291 | 0.28093 | 0.415988649 | 0.566333 | 5.31E-05 | hypermethylated |
| cg10888790 | 0.43311 | 0.641137297 | 0.5659   | 3.00E-05 | hypermethylated |
| cg14051662 | 0.34497 | 0.510623243 | 0.565788 | 0.012334 | hypermethylated |
| cg02881274 | 0.30516 | 0.451668649 | 0.565699 | 0.000207 | hypermethylated |
| cg01338347 | 0.25863 | 0.382714595 | 0.565379 | 1.71E-05 | hypermethylated |
| cg06798008 | 0.4702  | 0.695775676 | 0.565348 | 0.00064  | hypermethylated |
| cg16467015 | 0.5519  | 0.816639459 | 0.565292 | 5.72E-05 | hypermethylated |
| cg06687091 | 0.40718 | 0.602447568 | 0.565169 | 0.006915 | hypermethylated |
| cg04980849 | 0.41782 | 0.618020541 | 0.564773 | 0.018485 | hypermethylated |
| cg21117734 | 0.36804 | 0.544339459 | 0.564644 | 0.000293 | hypermethylated |
| cg04704294 | 0.35528 | 0.525386486 | 0.564423 | 0.000214 | hypermethylated |
| cg10055566 | 0.31201 | 0.461387027 | 0.564385 | 2.51E-05 | hypermethylated |
| cg13989664 | 0.45632 | 0.674693514 | 0.564186 | 0.001768 | hypermethylated |
| cg25050332 | 0.32046 | 0.473807568 | 0.564157 | 0.001452 | hypermethylated |
| cg14229207 | 0.60224 | 0.890234595 | 0.563847 | 0.000176 | hypermethylated |
| cg16962683 | 0.55604 | 0.821907568 | 0.563787 | 0.006679 | hypermethylated |

|            |         |             |          |          |                 |
|------------|---------|-------------|----------|----------|-----------------|
| cg03876032 | 0.34368 | 0.50799027  | 0.563735 | 5.19E-05 | hypermethylated |
| cg18881778 | 0.35003 | 0.517370811 | 0.56372  | 0.001237 | hypermethylated |
| cg14592399 | 0.31283 | 0.462359459 | 0.563636 | 1.12E-05 | hypermethylated |
| cg19426522 | 0.39454 | 0.582963243 | 0.563233 | 6.78E-05 | hypermethylated |
| cg25479732 | 0.33693 | 0.497808108 | 0.563141 | 0.00097  | hypermethylated |
| cg15554023 | 0.42804 | 0.632421081 | 0.56314  | 0.000204 | hypermethylated |
| cg07179981 | 0.5684  | 0.839604324 | 0.562803 | 0.000674 | hypermethylated |
| cg03457195 | 0.32963 | 0.486842162 | 0.562607 | 0.000274 | hypermethylated |
| cg01541178 | 0.32918 | 0.486164324 | 0.562567 | 0.000135 | hypermethylated |
| cg09151131 | 0.44252 | 0.653507027 | 0.56246  | 5.93E-05 | hypermethylated |
| cg03308399 | 0.37187 | 0.549102162 | 0.562276 | 0.003078 | hypermethylated |
| cg27649348 | 0.3052  | 0.450606486 | 0.562113 | 9.05E-05 | hypermethylated |
| cg13412545 | 0.32556 | 0.480659459 | 0.562092 | 0.000408 | hypermethylated |
| cg19240319 | 0.38698 | 0.571316757 | 0.562032 | 2.42E-06 | hypermethylated |
| cg22872857 | 0.46211 | 0.682212432 | 0.561985 | 0.010211 | hypermethylated |
| cg22682811 | 0.38502 | 0.568283243 | 0.561677 | 0.000474 | hypermethylated |
| cg04236178 | 0.35024 | 0.516939459 | 0.561651 | 6.01E-05 | hypermethylated |
| cg17478228 | 0.37272 | 0.550093514 | 0.561585 | 4.26E-05 | hypermethylated |
| cg12187394 | 0.32086 | 0.473532973 | 0.561521 | 7.56E-05 | hypermethylated |
| cg06331333 | 0.28424 | 0.41946973  | 0.561457 | 2.54E-05 | hypermethylated |
| cg25168494 | 0.28867 | 0.425945405 | 0.561247 | 0.000148 | hypermethylated |
| cg15915658 | 0.42251 | 0.623397297 | 0.561166 | 3.67E-05 | hypermethylated |
| cg05835726 | 0.34532 | 0.509401622 | 0.56087  | 0.003986 | hypermethylated |
| cg14156650 | 0.31881 | 0.470276216 | 0.560811 | 0.001667 | hypermethylated |
| cg25536014 | 0.38319 | 0.565177297 | 0.560644 | 0.000588 | hypermethylated |
| cg12924936 | 0.50045 | 0.738094595 | 0.56058  | 0.006451 | hypermethylated |
| cg03556669 | 0.36935 | 0.544681081 | 0.560423 | 0.00101  | hypermethylated |
| cg08719486 | 0.37205 | 0.54863027  | 0.560338 | 0.00095  | hypermethylated |
| cg26471674 | 0.29601 | 0.436498919 | 0.560332 | 2.02E-05 | hypermethylated |
| cg23904955 | 0.31602 | 0.465984324 | 0.560266 | 0.003255 | hypermethylated |
| cg13912311 | 0.35252 | 0.519801081 | 0.560255 | 0.000129 | hypermethylated |
| cg06455422 | 0.44701 | 0.659048649 | 0.560078 | 0.017101 | hypermethylated |
| cg07922843 | 0.39621 | 0.58413027  | 0.560025 | 0.006796 | hypermethylated |
| cg20826576 | 0.32047 | 0.472455676 | 0.55999  | 0.000581 | hypermethylated |
| cg02057782 | 0.32397 | 0.477605405 | 0.559959 | 6.75E-06 | hypermethylated |
| cg02503117 | 0.22766 | 0.335598378 | 0.559855 | 0.000306 | hypermethylated |
| cg15310162 | 0.56944 | 0.839364865 | 0.559754 | 0.00095  | hypermethylated |
| cg09014626 | 0.5198  | 0.76618973  | 0.559745 | 0.006915 | hypermethylated |
| cg12766736 | 0.36917 | 0.544138378 | 0.559688 | 3.76E-05 | hypermethylated |
| cg19037007 | 0.31012 | 0.456931351 | 0.559151 | 0.000358 | hypermethylated |
| cg00015319 | 0.32487 | 0.478661081 | 0.559142 | 3.00E-05 | hypermethylated |
| cg20762480 | 0.40148 | 0.591472432 | 0.558983 | 1.44E-05 | hypermethylated |
| cg23488198 | 0.40064 | 0.590204324 | 0.558908 | 0.001096 | hypermethylated |
| cg06928993 | 0.47302 | 0.696755676 | 0.558752 | 0.007472 | hypermethylated |
| cg24739407 | 0.42541 | 0.626597297 | 0.558685 | 0.000772 | hypermethylated |
| cg24185357 | 0.31779 | 0.468067568 | 0.558643 | 0.000696 | hypermethylated |
| cg06132727 | 0.39341 | 0.57924973  | 0.558152 | 0.000145 | hypermethylated |
| cg26802026 | 0.45018 | 0.662676216 | 0.557802 | 0.010042 | hypermethylated |
| cg02244431 | 0.47634 | 0.701131892 | 0.557694 | 0.002409 | hypermethylated |
| cg21896766 | 0.37395 | 0.550393514 | 0.557618 | 0.000408 | hypermethylated |
| cg10764068 | 0.30155 | 0.44382     | 0.557577 | 2.38E-05 | hypermethylated |
| cg19131667 | 0.43546 | 0.64089027  | 0.557537 | 0.000287 | hypermethylated |
| cg25360180 | 0.26791 | 0.394257838 | 0.557391 | 8.42E-05 | hypermethylated |
| cg25252197 | 0.4514  | 0.664147027 | 0.557096 | 0.00101  | hypermethylated |
| cg11416492 | 0.4077  | 0.599744324 | 0.55684  | 0.001437 | hypermethylated |
| cg10235817 | 0.26608 | 0.391397297 | 0.556774 | 0.000155 | hypermethylated |
| cg04902474 | 0.1778  | 0.261432973 | 0.556186 | 0.02255  | hypermethylated |
| cg04716021 | 0.29843 | 0.438774054 | 0.556086 | 0.001262 | hypermethylated |



|            |         |             |          |          |                 |
|------------|---------|-------------|----------|----------|-----------------|
| cg08379637 | 0.24578 | 0.361311351 | 0.555875 | 9.27E-05 | hypermethylated |
| cg13882284 | 0.32913 | 0.48375027  | 0.555605 | 1.04E-05 | hypermethylated |
| cg10402698 | 0.40537 | 0.595803243 | 0.555597 | 0.001734 | hypermethylated |
| cg10175249 | 0.52948 | 0.778191351 | 0.555549 | 0.007933 | hypermethylated |
| cg26272623 | 0.30904 | 0.454197297 | 0.555526 | 2.85E-05 | hypermethylated |
| cg15004136 | 0.32913 | 0.483707568 | 0.555478 | 0.000271 | hypermethylated |
| cg01713272 | 0.25488 | 0.374477297 | 0.55506  | 0.000354 | hypermethylated |
| cg15180789 | 0.33225 | 0.488110811 | 0.55494  | 8.13E-05 | hypermethylated |
| cg02371631 | 0.55448 | 0.81452973  | 0.554832 | 7.47E-05 | hypermethylated |
| cg12883980 | 0.34667 | 0.509238919 | 0.55478  | 1.18E-05 | hypermethylated |
| cg07330481 | 0.54166 | 0.795658378 | 0.554762 | 2.64E-05 | hypermethylated |
| cg27305357 | 0.2739  | 0.402288108 | 0.55458  | 3.00E-05 | hypermethylated |
| cg12363472 | 0.38108 | 0.559678378 | 0.554504 | 1.84E-05 | hypermethylated |
| cg05935800 | 0.34897 | 0.512488108 | 0.554416 | 0.020903 | hypermethylated |
| cg08915632 | 0.31655 | 0.464832432 | 0.554277 | 0.000214 | hypermethylated |
| cg00823843 | 0.35065 | 0.514850811 | 0.554123 | 0.00035  | hypermethylated |
| cg04090392 | 0.26884 | 0.394681081 | 0.55394  | 8.13E-05 | hypermethylated |
| cg26951440 | 0.30754 | 0.451466486 | 0.553845 | 9.27E-05 | hypermethylated |
| cg00540067 | 0.44159 | 0.648247027 | 0.553836 | 0.000681 | hypermethylated |
| cg06051411 | 0.54019 | 0.792971351 | 0.553802 | 0.000749 | hypermethylated |
| cg14507146 | 0.43976 | 0.645460541 | 0.553613 | 0.000653 | hypermethylated |
| cg26464586 | 0.36731 | 0.53906     | 0.553448 | 0.000575 | hypermethylated |
| cg13393830 | 0.36984 | 0.542697297 | 0.553246 | 0.001803 | hypermethylated |
| cg24112562 | 0.31628 | 0.464096757 | 0.553223 | 2.85E-05 | hypermethylated |
| cg09469610 | 0.26395 | 0.387261081 | 0.553042 | 5.72E-05 | hypermethylated |
| cg07917609 | 0.31168 | 0.45728     | 0.553012 | 0.00017  | hypermethylated |
| cg13918042 | 0.47433 | 0.695854595 | 0.552895 | 0.008419 | hypermethylated |
| cg17873048 | 0.41867 | 0.61412973  | 0.55273  | 0.007536 | hypermethylated |
| cg07194839 | 0.33575 | 0.492452973 | 0.552599 | 0.000204 | hypermethylated |
| cg21542881 | 0.35199 | 0.516230811 | 0.552482 | 0.002231 | hypermethylated |
| cg14160480 | 0.4477  | 0.656593514 | 0.552468 | 0.001603 | hypermethylated |
| cg16705273 | 0.35648 | 0.52261027  | 0.551914 | 0.005807 | hypermethylated |
| cg08267888 | 0.42933 | 0.629352973 | 0.551782 | 1.54E-05 | hypermethylated |
| cg24315815 | 0.35615 | 0.521938378 | 0.551394 | 0.012637 | hypermethylated |
| cg12186618 | 0.31956 | 0.468229189 | 0.551128 | 0.001164 | hypermethylated |
| cg07019315 | 0.3878  | 0.568148108 | 0.550954 | 0.000756 | hypermethylated |
| cg01750780 | 0.28263 | 0.413995676 | 0.550701 | 0.000256 | hypermethylated |
| cg16784745 | 0.58043 | 0.850113514 | 0.550533 | 8.22E-05 | hypermethylated |
| cg14078335 | 0.50366 | 0.737643243 | 0.550473 | 0.005757 | hypermethylated |
| cg18573327 | 0.36635 | 0.536528108 | 0.550431 | 7.84E-05 | hypermethylated |
| cg24259244 | 0.26916 | 0.394135135 | 0.550226 | 2.39E-05 | hypermethylated |
| cg00755130 | 0.45286 | 0.663062703 | 0.55008  | 7.65E-05 | hypermethylated |
| cg24909309 | 0.5005  | 0.732775676 | 0.550002 | 0.000327 | hypermethylated |
| cg02113641 | 0.27514 | 0.402822703 | 0.549979 | 9.27E-05 | hypermethylated |
| cg17482089 | 0.41198 | 0.603031892 | 0.54966  | 6.93E-06 | hypermethylated |
| cg26698460 | 0.47816 | 0.699897838 | 0.549651 | 0.001052 | hypermethylated |
| cg03389890 | 0.35594 | 0.520936757 | 0.549474 | 0.002478 | hypermethylated |
| cg11484576 | 0.42007 | 0.614739459 | 0.549345 | 0.004567 | hypermethylated |
| cg09121543 | 0.31837 | 0.465896757 | 0.549306 | 0.000875 | hypermethylated |
| cg18597643 | 0.27674 | 0.404945946 | 0.549198 | 2.78E-05 | hypermethylated |
| cg03335246 | 0.41155 | 0.601983784 | 0.548657 | 8.42E-05 | hypermethylated |
| cg18947175 | 0.35738 | 0.522725946 | 0.548596 | 0.000399 | hypermethylated |
| cg05348776 | 0.52167 | 0.762943243 | 0.548438 | 0.003378 | hypermethylated |
| cg10155522 | 0.55133 | 0.806302703 | 0.548405 | 0.000212 | hypermethylated |
| cg09832244 | 0.30449 | 0.445296216 | 0.548371 | 0.00017  | hypermethylated |
| cg15442037 | 0.40783 | 0.596345946 | 0.548182 | 5.51E-05 | hypermethylated |
| cg26644049 | 0.34391 | 0.502866486 | 0.548144 | 2.13E-05 | hypermethylated |
| cg09304047 | 0.42017 | 0.614302703 | 0.547977 | 0.002026 | hypermethylated |

|            |         |             |          |          |                 |
|------------|---------|-------------|----------|----------|-----------------|
| cg00716257 | 0.42502 | 0.621338378 | 0.547848 | 0.009552 | hypermethylated |
| cg23513966 | 0.30507 | 0.44597027  | 0.547807 | 2.78E-05 | hypermethylated |
| cg07048527 | 0.41427 | 0.605516216 | 0.547594 | 0.008491 | hypermethylated |
| cg16767916 | 0.3919  | 0.572727568 | 0.547363 | 1.35E-05 | hypermethylated |
| cg11246938 | 0.4709  | 0.688141622 | 0.547285 | 0.002409 | hypermethylated |
| cg04439252 | 0.24531 | 0.358434595 | 0.547104 | 0.00221  | hypermethylated |
| cg26207380 | 0.38216 | 0.558355135 | 0.547006 | 0.005606 | hypermethylated |
| cg11165752 | 0.36663 | 0.535582162 | 0.546783 | 1.94E-05 | hypermethylated |
| cg07493858 | 0.35011 | 0.511339459 | 0.546473 | 8.94E-05 | hypermethylated |
| cg04427469 | 0.23917 | 0.349294595 | 0.546408 | 6.31E-05 | hypermethylated |
| cg26649904 | 0.51443 | 0.751244324 | 0.546307 | 0.002649 | hypermethylated |
| cg19051015 | 0.30574 | 0.446474054 | 0.546271 | 0.004691 | hypermethylated |
| cg26196385 | 0.35165 | 0.513491892 | 0.546201 | 0.000588 | hypermethylated |
| cg19671120 | 0.26707 | 0.389888649 | 0.545844 | 0.000112 | hypermethylated |
| cg02339752 | 0.3064  | 0.447304324 | 0.54584  | 5.19E-05 | hypermethylated |
| cg14073497 | 0.22155 | 0.323395135 | 0.545666 | 0.007933 | hypermethylated |
| cg09619624 | 0.4604  | 0.671938378 | 0.545441 | 0.000667 | hypermethylated |
| cg24656271 | 0.32883 | 0.479899459 | 0.54539  | 3.85E-05 | hypermethylated |
| cg24343823 | 0.28506 | 0.415968649 | 0.545209 | 0.000214 | hypermethylated |
| cg07727170 | 0.38684 | 0.564476216 | 0.545176 | 0.000426 | hypermethylated |
| cg26456223 | 0.4028  | 0.587733514 | 0.545098 | 4.60E-06 | hypermethylated |
| cg08645860 | 0.3764  | 0.549086486 | 0.544767 | 2.71E-05 | hypermethylated |
| cg25611369 | 0.55266 | 0.806095135 | 0.544558 | 0.002026 | hypermethylated |
| cg18140268 | 0.39088 | 0.570082162 | 0.544444 | 0.000667 | hypermethylated |
| cg10804656 | 0.40182 | 0.586009189 | 0.544374 | 0.000182 | hypermethylated |
| cg25016420 | 0.52744 | 0.769174595 | 0.544304 | 0.001839 | hypermethylated |
| cg14504259 | 0.32361 | 0.471906486 | 0.544245 | 7.84E-05 | hypermethylated |
| cg20550790 | 0.32889 | 0.479563243 | 0.544116 | 0.000399 | hypermethylated |
| cg07416237 | 0.29365 | 0.428148108 | 0.544012 | 8.52E-05 | hypermethylated |
| cg12852499 | 0.29816 | 0.434722162 | 0.544007 | 4.58E-05 | hypermethylated |
| cg06773488 | 0.29715 | 0.43323027  | 0.543943 | 0.000342 | hypermethylated |
| cg13536060 | 0.46904 | 0.683783243 | 0.543828 | 0.000126 | hypermethylated |
| cg21548955 | 0.45139 | 0.657947027 | 0.543597 | 0.000313 | hypermethylated |
| cg01167502 | 0.3549  | 0.517283784 | 0.543543 | 0.000313 | hypermethylated |
| cg17029237 | 0.45828 | 0.667915676 | 0.543437 | 0.005508 | hypermethylated |
| cg06564388 | 0.31154 | 0.454018919 | 0.543335 | 2.51E-05 | hypermethylated |
| cg26814075 | 0.35473 | 0.516955135 | 0.543318 | 0.00028  | hypermethylated |
| cg18105979 | 0.28598 | 0.416726486 | 0.543187 | 0.000569 | hypermethylated |
| cg25015733 | 0.50895 | 0.741591351 | 0.5431   | 0.000626 | hypermethylated |
| cg12236088 | 0.35802 | 0.521610811 | 0.542934 | 0.000902 | hypermethylated |
| cg17642941 | 0.3718  | 0.54162     | 0.542754 | 0.000229 | hypermethylated |
| cg12935350 | 0.54565 | 0.794865405 | 0.542735 | 0.000756 | hypermethylated |
| cg07010948 | 0.29065 | 0.423314595 | 0.542447 | 1.62E-05 | hypermethylated |
| cg11491407 | 0.25812 | 0.375851351 | 0.54212  | 0.000912 | hypermethylated |
| cg24244500 | 0.35518 | 0.517175676 | 0.542104 | 4.58E-05 | hypermethylated |
| cg07807395 | 0.37908 | 0.551928108 | 0.541978 | 0.005411 | hypermethylated |
| cg04684114 | 0.29719 | 0.432697838 | 0.541974 | 2.85E-05 | hypermethylated |
| cg25461801 | 0.44253 | 0.644280541 | 0.541914 | 0.000152 | hypermethylated |
| cg06942701 | 0.31151 | 0.453503243 | 0.541834 | 1.75E-05 | hypermethylated |
| cg21814870 | 0.46773 | 0.680723243 | 0.541392 | 0.000474 | hypermethylated |
| cg20664313 | 0.36228 | 0.527212973 | 0.541281 | 0.001734 | hypermethylated |
| cg20699586 | 0.43622 | 0.634743784 | 0.541118 | 0.002318 | hypermethylated |
| cg20467957 | 0.32464 | 0.47236973  | 0.541076 | 3.81E-05 | hypermethylated |
| cg14494620 | 0.39645 | 0.576728108 | 0.540752 | 0.000274 | hypermethylated |
| cg15996534 | 0.3591  | 0.52228     | 0.540438 | 0.000195 | hypermethylated |
| cg23906060 | 0.26887 | 0.391028108 | 0.540364 | 0.000174 | hypermethylated |
| cg02658730 | 0.37014 | 0.538245405 | 0.540193 | 9.82E-06 | hypermethylated |
| cg13808012 | 0.3505  | 0.509633514 | 0.540046 | 0.0003   | hypermethylated |

|            |         |             |          |          |                 |
|------------|---------|-------------|----------|----------|-----------------|
| cg22894301 | 0.33947 | 0.493537297 | 0.539875 | 8.03E-05 | hypermethylated |
| cg24524057 | 0.35674 | 0.518612973 | 0.539785 | 9.95E-05 | hypermethylated |
| cg01603921 | 0.3376  | 0.490730811 | 0.539617 | 0.000306 | hypermethylated |
| cg14716686 | 0.47139 | 0.685189189 | 0.539581 | 1.73E-05 | hypermethylated |
| cg20148850 | 0.26383 | 0.383467568 | 0.539496 | 3.07E-05 | hypermethylated |
| cg19526568 | 0.29015 | 0.421661622 | 0.539287 | 2.13E-05 | hypermethylated |
| cg18470456 | 0.49115 | 0.713755676 | 0.539267 | 0.007799 | hypermethylated |
| cg17162319 | 0.3574  | 0.519376216 | 0.53924  | 0.000569 | hypermethylated |
| cg23675401 | 0.32864 | 0.477562162 | 0.53918  | 8.84E-05 | hypermethylated |
| cg02441618 | 0.28022 | 0.407138378 | 0.538959 | 9.27E-05 | hypermethylated |
| cg03729337 | 0.34364 | 0.499251351 | 0.538868 | 5.25E-05 | hypermethylated |
| cg19392831 | 0.31747 | 0.46118973  | 0.53874  | 1.30E-05 | hypermethylated |
| cg00055679 | 0.26757 | 0.38866     | 0.538592 | 9.27E-05 | hypermethylated |
| cg18985828 | 0.28411 | 0.412667027 | 0.538529 | 2.32E-05 | hypermethylated |
| cg04653800 | 0.51228 | 0.744069189 | 0.538504 | 0.002455 | hypermethylated |
| cg15496335 | 0.30997 | 0.450203784 | 0.53845  | 0.00031  | hypermethylated |
| cg18734433 | 0.33525 | 0.486814595 | 0.538135 | 0.001857 | hypermethylated |
| cg09031823 | 0.4611  | 0.669556216 | 0.538126 | 0.002231 | hypermethylated |
| cg16738453 | 0.5347  | 0.776380541 | 0.538034 | 0.000454 | hypermethylated |
| cg06868946 | 0.27346 | 0.397047027 | 0.53798  | 0.000166 | hypermethylated |
| cg04729913 | 0.31739 | 0.460765405 | 0.537776 | 1.25E-05 | hypermethylated |
| cg15644756 | 0.5412  | 0.785629189 | 0.537687 | 0.002363 | hypermethylated |
| cg12152384 | 0.42814 | 0.621491351 | 0.537652 | 0.02324  | hypermethylated |
| cg00875989 | 0.30648 | 0.444882162 | 0.53763  | 8.84E-05 | hypermethylated |
| cg14684434 | 0.4127  | 0.599027568 | 0.537529 | 0.000931 | hypermethylated |
| cg05166820 | 0.36873 | 0.535108108 | 0.537266 | 6.95E-05 | hypermethylated |
| cg07263322 | 0.42332 | 0.614322162 | 0.537247 | 0.000445 | hypermethylated |
| cg26189021 | 0.28454 | 0.412855135 | 0.537004 | 0.004691 | hypermethylated |
| cg10292376 | 0.28601 | 0.414986486 | 0.536999 | 2.04E-05 | hypermethylated |
| cg01730258 | 0.41488 | 0.601962162 | 0.536979 | 0.006679 | hypermethylated |
| cg00388812 | 0.35125 | 0.509591351 | 0.536843 | 1.26E-05 | hypermethylated |
| cg10130374 | 0.62202 | 0.902389189 | 0.536789 | 4.00E-05 | hypermethylated |
| cg03753391 | 0.29111 | 0.422317297 | 0.536763 | 8.22E-05 | hypermethylated |
| cg04956511 | 0.2119  | 0.307384865 | 0.536663 | 0.006564 | hypermethylated |
| cg25391117 | 0.42624 | 0.618226486 | 0.536469 | 0.000822 | hypermethylated |
| cg26967100 | 0.35194 | 0.510414595 | 0.53634  | 0.000107 | hypermethylated |
| cg11429111 | 0.40911 | 0.593240541 | 0.536128 | 0.002965 | hypermethylated |
| cg04918696 | 0.43057 | 0.624284865 | 0.535957 | 0.001987 | hypermethylated |
| cg13943333 | 0.43194 | 0.626225405 | 0.535851 | 0.000327 | hypermethylated |
| cg11118422 | 0.34884 | 0.505740541 | 0.535832 | 0.000417 | hypermethylated |
| cg18394340 | 0.29922 | 0.433785946 | 0.535777 | 0.000232 | hypermethylated |
| cg11234328 | 0.25846 | 0.374694054 | 0.535772 | 0.000142 | hypermethylated |
| cg27035480 | 0.47386 | 0.68692973  | 0.535702 | 0.000382 | hypermethylated |
| cg00349061 | 0.43825 | 0.635282703 | 0.535645 | 8.63E-05 | hypermethylated |
| cg03345448 | 0.34834 | 0.504915135 | 0.535545 | 7.72E-06 | hypermethylated |
| cg21407117 | 0.31321 | 0.453988649 | 0.535526 | 0.007933 | hypermethylated |
| cg03053290 | 0.45964 | 0.666151892 | 0.535347 | 0.003316 | hypermethylated |
| cg17284553 | 0.24669 | 0.357518919 | 0.53532  | 0.000229 | hypermethylated |
| cg03534031 | 0.41401 | 0.599895676 | 0.535046 | 5.19E-05 | hypermethylated |
| cg10741478 | 0.50017 | 0.724702162 | 0.53497  | 0.010211 | hypermethylated |
| cg15561613 | 0.40213 | 0.582642162 | 0.534948 | 0.000335 | hypermethylated |
| cg16227623 | 0.39896 | 0.577992432 | 0.534806 | 1.39E-05 | hypermethylated |
| cg21174375 | 0.5454  | 0.790128649 | 0.534773 | 0.000469 | hypermethylated |
| cg14012310 | 0.32106 | 0.464927027 | 0.534161 | 3.76E-05 | hypermethylated |
| cg12492087 | 0.45286 | 0.655765946 | 0.534116 | 0.000132 | hypermethylated |
| cg04353438 | 0.52554 | 0.760941622 | 0.533985 | 0.002526 | hypermethylated |
| cg18632634 | 0.49892 | 0.722380541 | 0.533951 | 0.000495 | hypermethylated |
| cg00041989 | 0.40368 | 0.584397838 | 0.533739 | 0.000226 | hypermethylated |

|            |         |             |          |          |                 |
|------------|---------|-------------|----------|----------|-----------------|
| cg03888033 | 0.36492 | 0.528276757 | 0.533714 | 6.31E-05 | hypermethylated |
| cg05364567 | 0.30404 | 0.440142703 | 0.53371  | 0.000386 | hypermethylated |
| cg03415617 | 0.49241 | 0.712567568 | 0.533167 | 0.001717 | hypermethylated |
| cg13791971 | 0.50715 | 0.733883784 | 0.533139 | 0.001875 | hypermethylated |
| cg03984866 | 0.44673 | 0.646351892 | 0.532917 | 0.007667 | hypermethylated |
| cg15446391 | 0.43491 | 0.62913027  | 0.532642 | 1.50E-05 | hypermethylated |
| cg18067859 | 0.42429 | 0.613748649 | 0.532597 | 1.80E-05 | hypermethylated |
| cg14628260 | 0.37396 | 0.540926486 | 0.532549 | 2.85E-05 | hypermethylated |
| cg23457588 | 0.30076 | 0.435012432 | 0.532444 | 3.57E-05 | hypermethylated |
| cg04766061 | 0.21015 | 0.303921081 | 0.532277 | 0.006796 | hypermethylated |
| cg26478297 | 0.36825 | 0.532533514 | 0.532187 | 0.008138 | hypermethylated |
| cg05656364 | 0.20123 | 0.290980541 | 0.532077 | 0.006451 | hypermethylated |
| cg07676709 | 0.37467 | 0.541697297 | 0.531866 | 0.002502 | hypermethylated |
| cg24490133 | 0.54537 | 0.788261622 | 0.531439 | 0.000262 | hypermethylated |
| cg25597138 | 0.25792 | 0.372781081 | 0.531405 | 8.63E-05 | hypermethylated |
| cg04419610 | 0.29564 | 0.427223784 | 0.53115  | 0.005557 | hypermethylated |
| cg00589850 | 0.36915 | 0.533353514 | 0.530885 | 0.000104 | hypermethylated |
| cg06727067 | 0.47008 | 0.679107027 | 0.530733 | 0.001839 | hypermethylated |
| cg12351768 | 0.51226 | 0.739995135 | 0.53064  | 0.000342 | hypermethylated |
| cg03742724 | 0.4545  | 0.656499459 | 0.530514 | 0.002856 | hypermethylated |
| cg25456849 | 0.33471 | 0.483377297 | 0.530238 | 1.18E-05 | hypermethylated |
| cg27631389 | 0.52965 | 0.764899459 | 0.530231 | 0.000575 | hypermethylated |
| cg10098523 | 0.32568 | 0.470263243 | 0.530013 | 0.007601 | hypermethylated |
| cg04195774 | 0.42954 | 0.620202162 | 0.529946 | 0.000789 | hypermethylated |
| cg17470674 | 0.4032  | 0.582158919 | 0.529917 | 0.007219 | hypermethylated |
| cg10398682 | 0.30711 | 0.443409189 | 0.529883 | 0.001164 | hypermethylated |
| cg11908057 | 0.41722 | 0.602343243 | 0.529778 | 0.003255 | hypermethylated |
| cg05803237 | 0.31208 | 0.45052973  | 0.529706 | 3.32E-05 | hypermethylated |
| cg12079548 | 0.31438 | 0.45376973  | 0.529451 | 4.31E-05 | hypermethylated |
| cg08111158 | 0.34382 | 0.496182162 | 0.529216 | 0.0006   | hypermethylated |
| cg21074347 | 0.41906 | 0.604754595 | 0.529193 | 0.000814 | hypermethylated |
| cg00562553 | 0.42274 | 0.609953514 | 0.528929 | 0.00134  | hypermethylated |
| cg21743182 | 0.46676 | 0.673419459 | 0.528824 | 0.00291  | hypermethylated |
| cg23378722 | 0.34414 | 0.496252432 | 0.528079 | 0.007866 | hypermethylated |
| cg03987660 | 0.35859 | 0.517072432 | 0.528031 | 0.000214 | hypermethylated |
| cg02662828 | 0.36844 | 0.53126973  | 0.528015 | 0.000112 | hypermethylated |
| cg14789818 | 0.43598 | 0.628627568 | 0.527944 | 0.002699 | hypermethylated |
| cg04004590 | 0.34874 | 0.502788108 | 0.527799 | 0.000287 | hypermethylated |
| cg14323204 | 0.37773 | 0.544518919 | 0.527627 | 8.84E-05 | hypermethylated |
| cg14780466 | 0.33078 | 0.476831892 | 0.527609 | 0.000831 | hypermethylated |
| cg19633004 | 0.49402 | 0.712072432 | 0.527455 | 0.01109  | hypermethylated |
| cg17107017 | 0.5712  | 0.823147027 | 0.527154 | 0.00012  | hypermethylated |
| cg00855990 | 0.32024 | 0.461427568 | 0.526951 | 5.86E-05 | hypermethylated |
| cg02852421 | 0.53885 | 0.776342703 | 0.52681  | 0.003986 | hypermethylated |
| cg16890121 | 0.60028 | 0.864831892 | 0.526784 | 0.000626 | hypermethylated |
| cg10936057 | 0.57287 | 0.825285946 | 0.526686 | 0.010381 | hypermethylated |
| cg19352726 | 0.55015 | 0.792446486 | 0.526488 | 0.000168 | hypermethylated |
| cg00830492 | 0.46023 | 0.662861081 | 0.526352 | 0.004863 | hypermethylated |
| cg15916646 | 0.29392 | 0.423304865 | 0.526274 | 0.000102 | hypermethylated |
| cg16982087 | 0.57511 | 0.828235135 | 0.526202 | 0.001541 | hypermethylated |
| cg14753432 | 0.28479 | 0.410035676 | 0.525851 | 3.23E-05 | hypermethylated |
| cg05343808 | 0.49514 | 0.712836757 | 0.525735 | 0.002168 | hypermethylated |
| cg07884222 | 0.47148 | 0.678752973 | 0.52569  | 4.10E-05 | hypermethylated |
| cg14862806 | 0.26618 | 0.383167568 | 0.525573 | 9.60E-05 | hypermethylated |
| cg08836199 | 0.49869 | 0.717724324 | 0.525287 | 0.012234 | hypermethylated |
| cg13293535 | 0.45101 | 0.649077838 | 0.525232 | 0.002126 | hypermethylated |
| cg11724970 | 0.34744 | 0.499875676 | 0.524805 | 0.004734 | hypermethylated |
| cg27391357 | 0.55081 | 0.792392973 | 0.524661 | 0.001354 | hypermethylated |

|            |         |             |          |          |                 |
|------------|---------|-------------|----------|----------|-----------------|
| cg03585823 | 0.53704 | 0.772571892 | 0.52464  | 0.006915 | hypermethylated |
| cg03985452 | 0.40587 | 0.583808649 | 0.524478 | 0.002751 | hypermethylated |
| cg17241310 | 0.43685 | 0.628245946 | 0.524191 | 1.46E-05 | hypermethylated |
| cg21419585 | 0.58366 | 0.839368649 | 0.524176 | 0.000202 | hypermethylated |
| cg12404831 | 0.37586 | 0.540475676 | 0.524034 | 0.000594 | hypermethylated |
| cg19979853 | 0.5371  | 0.772328108 | 0.524023 | 0.000626 | hypermethylated |
| cg22333259 | 0.31493 | 0.452816757 | 0.523896 | 0.002699 | hypermethylated |
| cg07179872 | 0.36341 | 0.522495135 | 0.523819 | 4.94E-05 | hypermethylated |
| cg21969566 | 0.49106 | 0.705856757 | 0.523476 | 5.50E-06 | hypermethylated |
| cg13229857 | 0.33527 | 0.481840541 | 0.523232 | 0.006507 | hypermethylated |
| cg10811426 | 0.3638  | 0.522804324 | 0.523126 | 0.009959 | hypermethylated |
| cg00237475 | 0.26918 | 0.386776216 | 0.522928 | 5.31E-05 | hypermethylated |
| cg17546247 | 0.38137 | 0.547807027 | 0.522476 | 5.19E-05 | hypermethylated |
| cg15196806 | 0.46971 | 0.674633514 | 0.522334 | 0.001635 | hypermethylated |
| cg22562383 | 0.56063 | 0.805066486 | 0.522059 | 0.00305  | hypermethylated |
| cg01966891 | 0.40763 | 0.585322162 | 0.521971 | 0.00032  | hypermethylated |
| cg08602008 | 0.37866 | 0.543701081 | 0.521911 | 5.12E-05 | hypermethylated |
| cg00964997 | 0.33786 | 0.485109189 | 0.521884 | 3.23E-05 | hypermethylated |
| cg08110693 | 0.47992 | 0.689017297 | 0.521746 | 0.038628 | hypermethylated |
| cg24125828 | 0.57916 | 0.831424865 | 0.521624 | 2.29E-06 | hypermethylated |
| cg26570233 | 0.5482  | 0.786973514 | 0.521613 | 0.013589 | hypermethylated |
| cg01493727 | 0.33684 | 0.483514054 | 0.521494 | 1.01E-05 | hypermethylated |
| cg01468220 | 0.41228 | 0.591778919 | 0.521434 | 8.32E-05 | hypermethylated |
| cg17786697 | 0.36233 | 0.519998919 | 0.521204 | 2.21E-05 | hypermethylated |
| cg11754318 | 0.31528 | 0.452342162 | 0.520781 | 1.18E-05 | hypermethylated |
| cg06013632 | 0.37227 | 0.534104865 | 0.520774 | 3.40E-05 | hypermethylated |
| cg09011231 | 0.38643 | 0.554352432 | 0.520596 | 0.001667 | hypermethylated |
| cg07943461 | 0.35835 | 0.51405027  | 0.52054  | 0.000324 | hypermethylated |
| cg01596674 | 0.39595 | 0.567878919 | 0.520265 | 0.001751 | hypermethylated |
| cg03731131 | 0.37454 | 0.537003784 | 0.519812 | 0.000517 | hypermethylated |
| cg15318546 | 0.47032 | 0.674202162 | 0.519539 | 0.00291  | hypermethylated |
| cg26055747 | 0.46511 | 0.666727568 | 0.519525 | 0.011182 | hypermethylated |
| cg27160395 | 0.40777 | 0.584508649 | 0.519469 | 0.000696 | hypermethylated |
| cg00188627 | 0.39121 | 0.560682162 | 0.51924  | 0.000187 | hypermethylated |
| cg19266635 | 0.57771 | 0.827859459 | 0.51904  | 0.008208 | hypermethylated |
| cg09411999 | 0.3259  | 0.466976216 | 0.51892  | 0.000166 | hypermethylated |
| cg11078084 | 0.44303 | 0.634805405 | 0.51891  | 0.000182 | hypermethylated |
| cg21931419 | 0.45462 | 0.651210811 | 0.518463 | 3.57E-05 | hypermethylated |
| cg22272713 | 0.40436 | 0.578948649 | 0.517795 | 0.007282 | hypermethylated |
| cg12689205 | 0.38927 | 0.557340541 | 0.517788 | 0.00031  | hypermethylated |
| cg06816651 | 0.28884 | 0.413516216 | 0.517673 | 0.000335 | hypermethylated |
| cg26880961 | 0.22903 | 0.327860541 | 0.517546 | 0.003914 | hypermethylated |
| cg14759565 | 0.55432 | 0.793462703 | 0.517443 | 6.46E-05 | hypermethylated |
| cg07857469 | 0.34741 | 0.497257297 | 0.517353 | 7.84E-05 | hypermethylated |
| cg11411203 | 0.30881 | 0.44198973  | 0.517293 | 1.54E-05 | hypermethylated |
| cg07557903 | 0.51138 | 0.731901081 | 0.517253 | 3.23E-05 | hypermethylated |
| cg00525277 | 0.42878 | 0.613574054 | 0.517    | 0.004649 | hypermethylated |
| cg01323104 | 0.39967 | 0.571887568 | 0.516922 | 0.001118 | hypermethylated |
| cg26390660 | 0.41462 | 0.593261081 | 0.516877 | 0.002829 | hypermethylated |
| cg17766651 | 0.54319 | 0.777094595 | 0.516633 | 0.000839 | hypermethylated |
| cg17353900 | 0.2516  | 0.359927027 | 0.516573 | 0.000875 | hypermethylated |
| cg26514430 | 0.40799 | 0.583538378 | 0.516294 | 2.74E-05 | hypermethylated |
| cg01306410 | 0.27573 | 0.394316757 | 0.516099 | 5.06E-05 | hypermethylated |
| cg20798152 | 0.27852 | 0.398302162 | 0.516082 | 9.31E-06 | hypermethylated |
| cg09075558 | 0.32066 | 0.458559459 | 0.516064 | 0.0006   | hypermethylated |
| cg00848392 | 0.29915 | 0.427772432 | 0.515974 | 0.000528 | hypermethylated |
| cg05984317 | 0.35684 | 0.510212973 | 0.515822 | 5.38E-05 | hypermethylated |
| cg08701183 | 0.3701  | 0.529132432 | 0.515714 | 0.000115 | hypermethylated |

|            |         |             |          |          |                 |
|------------|---------|-------------|----------|----------|-----------------|
| cg10211414 | 0.4222  | 0.603550811 | 0.515549 | 0.001667 | hypermethylated |
| cg10366797 | 0.42399 | 0.605774054 | 0.51475  | 3.85E-06 | hypermethylated |
| cg12448933 | 0.27958 | 0.399425946 | 0.514667 | 5.38E-05 | hypermethylated |
| cg26885488 | 0.3473  | 0.496154054 | 0.514606 | 1.99E-05 | hypermethylated |
| cg26047066 | 0.56418 | 0.805913514 | 0.51447  | 0.003914 | hypermethylated |
| cg17404981 | 0.29182 | 0.416822703 | 0.514355 | 0.009473 | hypermethylated |
| cg04272613 | 0.35328 | 0.504578919 | 0.514268 | 0.004951 | hypermethylated |
| cg17233506 | 0.39409 | 0.562808649 | 0.514119 | 0.007282 | hypermethylated |
| cg11334165 | 0.34503 | 0.492671351 | 0.513904 | 0.000893 | hypermethylated |
| cg19267457 | 0.4112  | 0.587123784 | 0.513824 | 0.008491 | hypermethylated |
| cg03048432 | 0.45038 | 0.643020541 | 0.513722 | 0.000209 | hypermethylated |
| cg11323255 | 0.36403 | 0.519720541 | 0.513679 | 0.0017   | hypermethylated |
| cg03995968 | 0.53029 | 0.756875676 | 0.513275 | 0.00255  | hypermethylated |
| cg14238120 | 0.47729 | 0.681058919 | 0.512914 | 0.000327 | hypermethylated |
| cg24678611 | 0.30956 | 0.441717297 | 0.512904 | 0.00012  | hypermethylated |
| cg05426006 | 0.56083 | 0.800097838 | 0.512613 | 0.005459 | hypermethylated |
| cg02357541 | 0.46934 | 0.669485946 | 0.51242  | 0.018628 | hypermethylated |
| cg03854796 | 0.29985 | 0.427688649 | 0.51232  | 2.39E-05 | hypermethylated |
| cg10655046 | 0.26632 | 0.379852973 | 0.51228  | 4.67E-06 | hypermethylated |
| cg13777798 | 0.58807 | 0.838710811 | 0.512186 | 0.00151  | hypermethylated |
| cg03829739 | 0.38378 | 0.547264324 | 0.511958 | 0.001452 | hypermethylated |
| cg01572696 | 0.33483 | 0.477328108 | 0.511552 | 5.72E-05 | hypermethylated |
| cg15844419 | 0.45916 | 0.654524865 | 0.511451 | 0.001395 | hypermethylated |
| cg17036007 | 0.29649 | 0.422488649 | 0.510929 | 2.78E-05 | hypermethylated |
| cg01568492 | 0.4499  | 0.641061622 | 0.510859 | 1.21E-05 | hypermethylated |
| cg16664193 | 0.37459 | 0.533735135 | 0.510812 | 0.000148 | hypermethylated |
| cg15022308 | 0.26709 | 0.380499459 | 0.510568 | 0.001031 | hypermethylated |
| cg06664357 | 0.3681  | 0.524331351 | 0.510381 | 0.000581 | hypermethylated |
| cg00040588 | 0.26725 | 0.380631351 | 0.510204 | 0.000454 | hypermethylated |
| cg00260802 | 0.29517 | 0.420338378 | 0.510005 | 9.96E-06 | hypermethylated |
| cg05934012 | 0.52717 | 0.750588108 | 0.509753 | 6.78E-05 | hypermethylated |
| cg26772847 | 0.47482 | 0.675948108 | 0.509532 | 0.000557 | hypermethylated |
| cg06727242 | 0.48769 | 0.694193514 | 0.509373 | 6.75E-06 | hypermethylated |
| cg01121554 | 0.37147 | 0.528762162 | 0.509373 | 0.000126 | hypermethylated |
| cg02568761 | 0.33515 | 0.476988649 | 0.509148 | 0.000271 | hypermethylated |
| cg12689506 | 0.37035 | 0.527082162 | 0.509139 | 0.000195 | hypermethylated |
| cg17741986 | 0.26743 | 0.3806      | 0.509114 | 9.72E-05 | hypermethylated |
| cg22852830 | 0.35764 | 0.508956757 | 0.509035 | 0.000557 | hypermethylated |
| cg17961200 | 0.55996 | 0.796872432 | 0.509025 | 0.002147 | hypermethylated |
| cg09343092 | 0.44608 | 0.634793514 | 0.508985 | 0.001734 | hypermethylated |
| cg15070710 | 0.44567 | 0.634208649 | 0.508982 | 0.018485 | hypermethylated |
| cg23712458 | 0.33267 | 0.473402703 | 0.508976 | 0.003316 | hypermethylated |
| cg03512076 | 0.37966 | 0.540225405 | 0.508853 | 0.000256 | hypermethylated |
| cg12592691 | 0.3576  | 0.508731892 | 0.508559 | 0.002066 | hypermethylated |
| cg04500377 | 0.3534  | 0.502739459 | 0.508509 | 0.006507 | hypermethylated |
| cg20166027 | 0.4346  | 0.618124324 | 0.508209 | 0.003986 | hypermethylated |
| cg10142436 | 0.40731 | 0.579244324 | 0.508045 | 0.000412 | hypermethylated |
| cg20128928 | 0.34958 | 0.49710973  | 0.507942 | 0.000287 | hypermethylated |
| cg14755690 | 0.55993 | 0.796178378 | 0.507845 | 0.004365 | hypermethylated |
| cg19839825 | 0.43948 | 0.624845405 | 0.507702 | 0.006737 | hypermethylated |
| cg08172947 | 0.48786 | 0.693355676 | 0.507128 | 0.02638  | hypermethylated |
| cg02596940 | 0.31843 | 0.452557297 | 0.507124 | 0.000426 | hypermethylated |
| cg01795955 | 0.35848 | 0.509461081 | 0.507079 | 0.004365 | hypermethylated |
| cg24202131 | 0.38925 | 0.553033514 | 0.50667  | 0.000198 | hypermethylated |
| cg26791307 | 0.43009 | 0.611047027 | 0.506645 | 0.006507 | hypermethylated |
| cg18731024 | 0.5844  | 0.830197838 | 0.506499 | 0.003773 | hypermethylated |
| cg03229561 | 0.38623 | 0.548672432 | 0.506485 | 7.47E-05 | hypermethylated |
| cg01171212 | 0.25284 | 0.359116757 | 0.506228 | 0.000119 | hypermethylated |

|            |         |             |          |          |                 |
|------------|---------|-------------|----------|----------|-----------------|
| cg21660130 | 0.49377 | 0.7013      | 0.506193 | 0.007408 | hypermethylated |
| cg21236845 | 0.53038 | 0.753250811 | 0.506104 | 0.012637 | hypermethylated |
| cg22287148 | 0.56975 | 0.809067027 | 0.50593  | 0.005411 | hypermethylated |
| cg12600530 | 0.60247 | 0.855516216 | 0.505906 | 0.003225 | hypermethylated |
| cg24702360 | 0.38045 | 0.540213514 | 0.505823 | 0.000132 | hypermethylated |
| cg12389786 | 0.40782 | 0.579065405 | 0.505794 | 2.15E-05 | hypermethylated |
| cg24953321 | 0.29394 | 0.417357838 | 0.505763 | 1.18E-05 | hypermethylated |
| cg13782301 | 0.39007 | 0.55381027  | 0.505659 | 1.82E-05 | hypermethylated |
| cg10469980 | 0.39621 | 0.562513514 | 0.505622 | 0.006737 | hypermethylated |
| cg05141333 | 0.60589 | 0.860164324 | 0.505556 | 6.78E-05 | hypermethylated |
| cg07053697 | 0.3951  | 0.560687568 | 0.504979 | 0.000674 | hypermethylated |
| cg27516568 | 0.43922 | 0.623287027 | 0.504953 | 0.000575 | hypermethylated |
| cg22154659 | 0.51707 | 0.733681081 | 0.504793 | 0.00028  | hypermethylated |
| cg07428004 | 0.37042 | 0.52559027  | 0.504777 | 0.000464 | hypermethylated |
| cg00473624 | 0.64782 | 0.919167568 | 0.504735 | 0.000296 | hypermethylated |
| cg05109569 | 0.38308 | 0.543534054 | 0.504725 | 0.005411 | hypermethylated |
| cg16607685 | 0.41872 | 0.594092432 | 0.504702 | 3.76E-05 | hypermethylated |
| cg11728738 | 0.44422 | 0.630260541 | 0.504674 | 0.008208 | hypermethylated |
| cg13707793 | 0.60765 | 0.862115676 | 0.504641 | 0.000216 | hypermethylated |
| cg20492034 | 0.49582 | 0.703394054 | 0.504517 | 0.027371 | hypermethylated |
| cg10201616 | 0.60124 | 0.852927568 | 0.504482 | 0.002502 | hypermethylated |
| cg01386185 | 0.4957  | 0.703057838 | 0.504176 | 0.010468 | hypermethylated |
| cg12594635 | 0.3824  | 0.542338378 | 0.504111 | 0.006915 | hypermethylated |
| cg00895997 | 0.42974 | 0.60942973  | 0.503996 | 0.003843 | hypermethylated |
| cg06593118 | 0.51176 | 0.725704324 | 0.503914 | 0.006339 | hypermethylated |
| cg02363202 | 0.42954 | 0.608947027 | 0.503524 | 0.004863 | hypermethylated |
| cg09326087 | 0.57141 | 0.809948108 | 0.503303 | 6.38E-05 | hypermethylated |
| cg23679260 | 0.26463 | 0.375101081 | 0.503303 | 0.000195 | hypermethylated |
| cg00474798 | 0.47587 | 0.674441622 | 0.503126 | 0.00193  | hypermethylated |
| cg05886272 | 0.2799  | 0.396654595 | 0.502972 | 0.003705 | hypermethylated |
| cg09257635 | 0.51707 | 0.732664865 | 0.502794 | 0.000399 | hypermethylated |
| cg14384093 | 0.49272 | 0.698084865 | 0.502634 | 0.000485 | hypermethylated |
| cg16501028 | 0.38127 | 0.540144865 | 0.502533 | 3.67E-05 | hypermethylated |
| cg24101039 | 0.52109 | 0.738191892 | 0.502463 | 0.014838 | hypermethylated |
| cg08395122 | 0.32556 | 0.461125946 | 0.502237 | 3.79E-06 | hypermethylated |
| cg11315991 | 0.49101 | 0.695403784 | 0.502099 | 0.003021 | hypermethylated |
| cg04997045 | 0.52318 | 0.74096     | 0.502088 | 0.001635 | hypermethylated |
| cg06282247 | 0.35344 | 0.500537297 | 0.502012 | 5.45E-05 | hypermethylated |
| cg00590029 | 0.34403 | 0.48714     | 0.501802 | 3.07E-05 | hypermethylated |
| cg06614044 | 0.45763 | 0.647831351 | 0.501437 | 0.000207 | hypermethylated |
| cg23556923 | 0.2761  | 0.390845405 | 0.501407 | 0.000733 | hypermethylated |
| cg05114861 | 0.44025 | 0.623014054 | 0.500942 | 0.001031 | hypermethylated |
| cg26808747 | 0.39351 | 0.556815676 | 0.5008   | 7.72E-06 | hypermethylated |
| cg15087376 | 0.49369 | 0.698511351 | 0.500678 | 0.027776 | hypermethylated |
| cg22375610 | 0.33716 | 0.47703027  | 0.500647 | 0.006229 | hypermethylated |
| cg14610335 | 0.42316 | 0.598565405 | 0.500306 | 0.000399 | hypermethylated |
| cg24964368 | 0.46272 | 0.654507568 | 0.50027  | 5.19E-05 | hypermethylated |
| cg05900785 | 0.2888  | 0.408478919 | 0.500191 | 1.18E-05 | hypermethylated |
| cg02206157 | 0.28597 | 0.404467027 | 0.500158 | 0.000132 | hypermethylated |
| cg22805485 | 0.54993 | 0.777789189 | 0.500131 | 0.000588 | hypermethylated |
| cg04093645 | 0.5596  | 0.791452973 | 0.500108 | 0.002432 | hypermethylated |
| cg00370815 | 0.25731 | 0.363901081 | 0.500039 | 0.000358 | hypermethylated |
| cg01911239 | 0.33677 | 0.476215676 | 0.499851 | 3.23E-05 | hypermethylated |
| cg01165683 | 0.47005 | 0.664498378 | 0.499451 | 0.03076  | hypermethylated |
| cg15817769 | 0.53257 | 0.752836216 | 0.499365 | 0.001262 | hypermethylated |
| cg16923137 | 0.60161 | 0.850423784 | 0.499353 | 0.000165 | hypermethylated |
| cg15842276 | 0.30658 | 0.433318378 | 0.499164 | 1.42E-05 | hypermethylated |
| cg05767720 | 0.45889 | 0.648462162 | 0.498874 | 0.000187 | hypermethylated |

|            |         |             |          |          |                 |
|------------|---------|-------------|----------|----------|-----------------|
| cg25643223 | 0.47802 | 0.675464865 | 0.49881  | 0.000741 | hypermethylated |
| cg11166453 | 0.47101 | 0.66553027  | 0.498747 | 0.000931 | hypermethylated |
| cg02323356 | 0.33649 | 0.475447568 | 0.498723 | 2.32E-05 | hypermethylated |
| cg02215430 | 0.51783 | 0.731591892 | 0.498561 | 0.005316 | hypermethylated |
| cg27054655 | 0.40613 | 0.573749189 | 0.498479 | 3.81E-05 | hypermethylated |
| cg11681428 | 0.30158 | 0.426036757 | 0.498437 | 0.00071  | hypermethylated |
| cg27038634 | 0.32364 | 0.457187027 | 0.498395 | 0.00048  | hypermethylated |
| cg06807928 | 0.50404 | 0.711796757 | 0.497927 | 0.01073  | hypermethylated |
| cg19846491 | 0.37415 | 0.528114595 | 0.497234 | 0.01274  | hypermethylated |
| cg01819512 | 0.34051 | 0.480616216 | 0.497188 | 8.63E-05 | hypermethylated |
| cg02726930 | 0.31517 | 0.444822703 | 0.4971   | 0.001875 | hypermethylated |
| cg01146063 | 0.34374 | 0.485121081 | 0.497027 | 0.000152 | hypermethylated |
| cg24617504 | 0.28958 | 0.408658919 | 0.496935 | 0.000126 | hypermethylated |
| cg21871232 | 0.46889 | 0.661634054 | 0.496784 | 0.008069 | hypermethylated |
| cg17953764 | 0.42378 | 0.597913514 | 0.496621 | 8.03E-05 | hypermethylated |
| cg22494346 | 0.51992 | 0.733552432 | 0.49661  | 0.030983 | hypermethylated |
| cg24017995 | 0.45553 | 0.642643784 | 0.496473 | 0.01109  | hypermethylated |
| cg23092421 | 0.56547 | 0.797731351 | 0.496452 | 0.000135 | hypermethylated |
| cg02268156 | 0.45622 | 0.643598919 | 0.496432 | 2.51E-05 | hypermethylated |
| cg23691946 | 0.35049 | 0.494391351 | 0.49628  | 1.58E-05 | hypermethylated |
| cg09574499 | 0.51181 | 0.721932432 | 0.496255 | 0.005223 | hypermethylated |
| cg23527621 | 0.29993 | 0.422915135 | 0.495742 | 0.000474 | hypermethylated |
| cg05638493 | 0.34725 | 0.489617838 | 0.495681 | 9.27E-05 | hypermethylated |
| cg27173965 | 0.50158 | 0.707220541 | 0.49568  | 0.000327 | hypermethylated |
| cg16544169 | 0.28642 | 0.403663243 | 0.49502  | 4.94E-05 | hypermethylated |
| cg26612727 | 0.37719 | 0.531584865 | 0.495009 | 7.03E-05 | hypermethylated |
| cg03828328 | 0.32751 | 0.461532432 | 0.494893 | 0.001301 | hypermethylated |
| cg11795276 | 0.40998 | 0.577747027 | 0.494884 | 6.46E-05 | hypermethylated |
| cg25152404 | 0.3614  | 0.509243243 | 0.494758 | 0.007282 | hypermethylated |
| cg23570694 | 0.32456 | 0.45730973  | 0.494686 | 3.96E-06 | hypermethylated |
| cg10295552 | 0.43522 | 0.613201622 | 0.494617 | 0.001212 | hypermethylated |
| cg00962755 | 0.49145 | 0.692395135 | 0.494551 | 2.05E-06 | hypermethylated |
| cg07631435 | 0.41487 | 0.584473514 | 0.494478 | 0.000358 | hypermethylated |
| cg04223553 | 0.43093 | 0.607083243 | 0.494441 | 9.27E-05 | hypermethylated |
| cg03679544 | 0.54866 | 0.772921622 | 0.49441  | 2.10E-05 | hypermethylated |
| cg02337614 | 0.46884 | 0.660318378 | 0.494066 | 0.004951 | hypermethylated |
| cg06990571 | 0.56258 | 0.792296757 | 0.493983 | 0.002725 | hypermethylated |
| cg23666945 | 0.51619 | 0.726854595 | 0.493765 | 0.000772 | hypermethylated |
| cg04735481 | 0.3399  | 0.478602703 | 0.493718 | 0.000839 | hypermethylated |
| cg09477232 | 0.33731 | 0.474941081 | 0.493673 | 0.001734 | hypermethylated |
| cg26345916 | 0.40063 | 0.564049189 | 0.493551 | 0.002026 | hypermethylated |
| cg11237948 | 0.30342 | 0.427183243 | 0.493539 | 0.000112 | hypermethylated |
| cg03827835 | 0.48657 | 0.684995676 | 0.493448 | 0.000163 | hypermethylated |
| cg23596826 | 0.56208 | 0.791283784 | 0.49342  | 0.020586 | hypermethylated |
| cg27269917 | 0.50481 | 0.710579459 | 0.493255 | 0.000884 | hypermethylated |
| cg07944936 | 0.46705 | 0.657361622 | 0.49311  | 0.003195 | hypermethylated |
| cg03276401 | 0.40846 | 0.574824865 | 0.492928 | 0.008491 | hypermethylated |
| cg21493505 | 0.28993 | 0.407959459 | 0.492721 | 3.90E-05 | hypermethylated |
| cg11457640 | 0.36671 | 0.515967027 | 0.492639 | 0.000408 | hypermethylated |
| cg15865511 | 0.55986 | 0.787688108 | 0.492558 | 0.003878 | hypermethylated |
| cg02122937 | 0.5064  | 0.712416757 | 0.492444 | 0.000226 | hypermethylated |
| cg06761530 | 0.60688 | 0.853350811 | 0.491728 | 0.005411 | hypermethylated |
| cg08352755 | 0.39063 | 0.549168108 | 0.491445 | 0.000187 | hypermethylated |
| cg20014988 | 0.4298  | 0.604164324 | 0.491276 | 0.003225 | hypermethylated |
| cg10024478 | 0.3813  | 0.535947568 | 0.491165 | 0.006451 | hypermethylated |
| cg06570224 | 0.37207 | 0.522972973 | 0.491162 | 1.18E-05 | hypermethylated |
| cg00600617 | 0.42248 | 0.593761622 | 0.491001 | 0.028602 | hypermethylated |
| cg01134260 | 0.47867 | 0.67267027  | 0.490868 | 0.005808 | hypermethylated |



|            |         |             |          |          |                 |
|------------|---------|-------------|----------|----------|-----------------|
| cg06888121 | 0.46682 | 0.656006486 | 0.490844 | 0.002066 | hypermethylated |
| cg03979754 | 0.40642 | 0.571015676 | 0.490559 | 0.000335 | hypermethylated |
| cg07429284 | 0.32426 | 0.45551027  | 0.490333 | 0.002363 | hypermethylated |
| cg19360104 | 0.36772 | 0.51655027  | 0.490301 | 6.01E-05 | hypermethylated |
| cg00702719 | 0.38046 | 0.534405405 | 0.49019  | 5.25E-05 | hypermethylated |
| cg04813119 | 0.50013 | 0.702475135 | 0.490144 | 0.000152 | hypermethylated |
| cg04051396 | 0.62744 | 0.881086486 | 0.489806 | 0.003255 | hypermethylated |
| cg12758973 | 0.40559 | 0.569512432 | 0.489705 | 0.00054  | hypermethylated |
| cg06850597 | 0.28454 | 0.399536757 | 0.489697 | 6.31E-05 | hypermethylated |
| cg26381514 | 0.51704 | 0.725998919 | 0.489692 | 0.00097  | hypermethylated |
| cg23266594 | 0.44842 | 0.629591351 | 0.489565 | 6.95E-05 | hypermethylated |
| cg16311302 | 0.27319 | 0.383524865 | 0.489415 | 0.001912 | hypermethylated |
| cg24652842 | 0.3272  | 0.459284324 | 0.489215 | 0.000163 | hypermethylated |
| cg24288527 | 0.65754 | 0.922942703 | 0.489162 | 4.70E-05 | hypermethylated |
| cg07790279 | 0.46229 | 0.648881622 | 0.489157 | 0.000805 | hypermethylated |
| cg01568919 | 0.2814  | 0.394972432 | 0.48913  | 9.49E-05 | hypermethylated |
| cg00548268 | 0.35791 | 0.502354595 | 0.489109 | 5.73E-06 | hypermethylated |
| cg10055580 | 0.43902 | 0.616139459 | 0.48897  | 0.010731 | hypermethylated |
| cg14371590 | 0.35247 | 0.494667027 | 0.488957 | 0.000182 | hypermethylated |
| cg05262549 | 0.40527 | 0.568690811 | 0.488761 | 0.000296 | hypermethylated |
| cg14520423 | 0.45225 | 0.634478919 | 0.488452 | 0.003441 | hypermethylated |
| cg08980382 | 0.34838 | 0.488727027 | 0.488367 | 0.000229 | hypermethylated |
| cg09619390 | 0.2964  | 0.4158      | 0.488344 | 9.27E-05 | hypermethylated |
| cg15683166 | 0.59702 | 0.83737027  | 0.488086 | 0.001437 | hypermethylated |
| cg26643754 | 0.30227 | 0.423903784 | 0.487899 | 0.000122 | hypermethylated |
| cg18394552 | 0.46629 | 0.653596216 | 0.487172 | 0.005364 | hypermethylated |
| cg11738976 | 0.31371 | 0.439712973 | 0.487131 | 2.32E-05 | hypermethylated |
| cg16857771 | 0.39413 | 0.552396216 | 0.487032 | 0.003378 | hypermethylated |
| cg21253742 | 0.48525 | 0.680043243 | 0.486898 | 0.000667 | hypermethylated |
| cg26581886 | 0.38063 | 0.533352432 | 0.4867   | 4.64E-05 | hypermethylated |
| cg14037728 | 0.41647 | 0.583530811 | 0.486596 | 0.00032  | hypermethylated |
| cg27295850 | 0.28655 | 0.401481081 | 0.486545 | 0.001085 | hypermethylated |
| cg11679455 | 0.58088 | 0.813797297 | 0.486429 | 0.003136 | hypermethylated |
| cg25800638 | 0.48415 | 0.678276216 | 0.486419 | 0.001074 | hypermethylated |
| cg10120856 | 0.42269 | 0.592157297 | 0.48638  | 0.006339 | hypermethylated |
| cg07758738 | 0.37816 | 0.529705946 | 0.486195 | 2.54E-05 | hypermethylated |
| cg09073799 | 0.37341 | 0.523042162 | 0.486167 | 0.001496 | hypermethylated |
| cg06872138 | 0.47946 | 0.671580541 | 0.48615  | 0.027776 | hypermethylated |
| cg15772157 | 0.41874 | 0.586414054 | 0.485865 | 2.32E-05 | hypermethylated |
| cg15325373 | 0.43345 | 0.606981081 | 0.485786 | 0.000506 | hypermethylated |
| cg22560214 | 0.36876 | 0.516389189 | 0.485777 | 2.27E-05 | hypermethylated |
| cg14037652 | 0.62681 | 0.877452973 | 0.485294 | 0.000287 | hypermethylated |
| cg02352240 | 0.35824 | 0.501452432 | 0.485186 | 6.05E-06 | hypermethylated |
| cg01217984 | 0.35686 | 0.499512432 | 0.485162 | 0.001368 | hypermethylated |
| cg21279601 | 0.4012  | 0.561549189 | 0.485091 | 0.000256 | hypermethylated |
| cg14270725 | 0.30075 | 0.420948649 | 0.48508  | 0.000551 | hypermethylated |
| cg18484189 | 0.39423 | 0.551775135 | 0.485043 | 0.003316 | hypermethylated |
| cg27316626 | 0.46675 | 0.65319027  | 0.484853 | 9.49E-05 | hypermethylated |
| cg04646186 | 0.44031 | 0.616182162 | 0.484837 | 0.001212 | hypermethylated |
| cg27552378 | 0.61885 | 0.865898919 | 0.484609 | 3.32E-05 | hypermethylated |
| cg14074305 | 0.53375 | 0.746804324 | 0.484566 | 0.003705 | hypermethylated |
| cg16354688 | 0.48741 | 0.681882703 | 0.484388 | 0.006068 | hypermethylated |
| cg23932873 | 0.48159 | 0.673694054 | 0.484288 | 0.019361 | hypermethylated |
| cg15960924 | 0.53875 | 0.75358973  | 0.484163 | 0.000365 | hypermethylated |
| cg05446471 | 0.52985 | 0.741088649 | 0.484062 | 0.003705 | hypermethylated |
| cg21683069 | 0.45263 | 0.633022162 | 0.483924 | 0.003136 | hypermethylated |
| cg18436984 | 0.34947 | 0.488662162 | 0.483669 | 9.16E-05 | hypermethylated |
| cg04629595 | 0.35256 | 0.492968649 | 0.483627 | 0.000219 | hypermethylated |

|            |         |             |          |          |                 |
|------------|---------|-------------|----------|----------|-----------------|
| cg02246609 | 0.36932 | 0.516311351 | 0.48337  | 8.22E-05 | hypermethylated |
| cg09263516 | 0.36002 | 0.503298378 | 0.483337 | 6.70E-05 | hypermethylated |
| cg24794052 | 0.46049 | 0.643684324 | 0.483184 | 0.009877 | hypermethylated |
| cg11142514 | 0.50073 | 0.699882162 | 0.483079 | 0.037297 | hypermethylated |
| cg09363891 | 0.52559 | 0.734466486 | 0.482759 | 0.000506 | hypermethylated |
| cg12232463 | 0.53052 | 0.741315676 | 0.482681 | 7.65E-05 | hypermethylated |
| cg14047339 | 0.23106 | 0.322845946 | 0.482578 | 0.000193 | hypermethylated |
| cg04075738 | 0.3951  | 0.552011892 | 0.482482 | 0.000681 | hypermethylated |
| cg13829680 | 0.53781 | 0.751337838 | 0.482365 | 0.016061 | hypermethylated |
| cg00851532 | 0.63926 | 0.892874054 | 0.482054 | 0.014603 | hypermethylated |
| cg03400785 | 0.3835  | 0.535559459 | 0.48182  | 9.72E-05 | hypermethylated |
| cg24767131 | 0.37345 | 0.521507027 | 0.481772 | 0.004863 | hypermethylated |
| cg17608570 | 0.37914 | 0.529421622 | 0.481686 | 0.003705 | hypermethylated |
| cg18527574 | 0.52841 | 0.737754595 | 0.481483 | 4.94E-05 | hypermethylated |
| cg17479280 | 0.50415 | 0.703778919 | 0.481269 | 7.65E-05 | hypermethylated |
| cg16826777 | 0.40522 | 0.565574054 | 0.481011 | 4.70E-05 | hypermethylated |
| cg18031134 | 0.27117 | 0.378468649 | 0.480976 | 0.0002   | hypermethylated |
| cg24317217 | 0.41904 | 0.584835676 | 0.480943 | 0.0182   | hypermethylated |
| cg10749822 | 0.31472 | 0.439227568 | 0.4809   | 1.15E-05 | hypermethylated |
| cg25306277 | 0.46087 | 0.643119459 | 0.480727 | 0.000772 | hypermethylated |
| cg02859129 | 0.43174 | 0.602436216 | 0.480646 | 8.42E-05 | hypermethylated |
| cg05452645 | 0.4333  | 0.604602703 | 0.480621 | 3.40E-05 | hypermethylated |
| cg02106682 | 0.37558 | 0.524022703 | 0.480509 | 0.001188 | hypermethylated |
| cg25935985 | 0.40894 | 0.570475676 | 0.480276 | 5.50E-06 | hypermethylated |
| cg21078322 | 0.48429 | 0.675502162 | 0.480089 | 0.029449 | hypermethylated |
| cg10267867 | 0.37963 | 0.529511892 | 0.480069 | 0.00066  | hypermethylated |
| cg12599168 | 0.47199 | 0.658293514 | 0.479975 | 0.003637 | hypermethylated |
| cg03601372 | 0.42293 | 0.589804324 | 0.479818 | 0.01146  | hypermethylated |
| cg01413790 | 0.28994 | 0.404325946 | 0.479764 | 0.000575 | hypermethylated |
| cg11868485 | 0.49303 | 0.687385946 | 0.479445 | 0.006015 | hypermethylated |
| cg27509347 | 0.42334 | 0.590153514 | 0.479273 | 0.00504  | hypermethylated |
| cg03202564 | 0.46035 | 0.641685946 | 0.479136 | 2.18E-05 | hypermethylated |
| cg22231400 | 0.39696 | 0.553290811 | 0.479044 | 0.000293 | hypermethylated |
| cg23884241 | 0.34658 | 0.483056216 | 0.479003 | 0.000822 | hypermethylated |
| cg14522034 | 0.38679 | 0.539096757 | 0.478994 | 0.001603 | hypermethylated |
| cg23358886 | 0.40135 | 0.559374054 | 0.478952 | 0.0006   | hypermethylated |
| cg12341314 | 0.36256 | 0.505282703 | 0.478871 | 0.000204 | hypermethylated |
| cg01245224 | 0.55627 | 0.77518     | 0.478746 | 0.002147 | hypermethylated |
| cg15639951 | 0.41496 | 0.578248649 | 0.478718 | 0.000848 | hypermethylated |
| cg25007722 | 0.37868 | 0.527655676 | 0.478618 | 1.30E-05 | hypermethylated |
| cg02074191 | 0.4228  | 0.589059459 | 0.478438 | 3.40E-05 | hypermethylated |
| cg26377880 | 0.46119 | 0.642541081 | 0.478427 | 0.017101 | hypermethylated |
| cg16021217 | 0.36324 | 0.506073514 | 0.478424 | 0.005269 | hypermethylated |
| cg04674315 | 0.483   | 0.672838378 | 0.478237 | 1.15E-05 | hypermethylated |
| cg25727671 | 0.52424 | 0.730053514 | 0.477775 | 0.009959 | hypermethylated |
| cg08091601 | 0.49076 | 0.683408108 | 0.47773  | 0.041702 | hypermethylated |
| cg16626580 | 0.38988 | 0.542892432 | 0.477636 | 0.000221 | hypermethylated |
| cg20721467 | 0.51098 | 0.711477297 | 0.477551 | 0.006796 | hypermethylated |
| cg07724623 | 0.4073  | 0.567024324 | 0.477319 | 0.000551 | hypermethylated |
| cg18739887 | 0.41818 | 0.582097838 | 0.477138 | 0.003571 | hypermethylated |
| cg02938172 | 0.42075 | 0.585674595 | 0.477136 | 0.001839 | hypermethylated |
| cg08564636 | 0.48054 | 0.668857838 | 0.477043 | 0.034997 | hypermethylated |
| cg13057576 | 0.5817  | 0.80965027  | 0.477024 | 0.000681 | hypermethylated |
| cg23855818 | 0.5487  | 0.763615135 | 0.476828 | 0.001768 | hypermethylated |
| cg20070618 | 0.5047  | 0.702267568 | 0.476595 | 0.019361 | hypermethylated |
| cg27031484 | 0.53233 | 0.740614595 | 0.476402 | 0.00291  | hypermethylated |
| cg27159583 | 0.50032 | 0.696060541 | 0.476362 | 0.036516 | hypermethylated |
| cg26775079 | 0.42639 | 0.593134054 | 0.476185 | 0.000374 | hypermethylated |

|            |         |             |          |          |                 |
|------------|---------|-------------|----------|----------|-----------------|
| cg16924061 | 0.56541 | 0.786481081 | 0.476115 | 0.003225 | hypermethylated |
| cg04986781 | 0.37559 | 0.522416757 | 0.476043 | 0.000172 | hypermethylated |
| cg07097876 | 0.40218 | 0.559338378 | 0.47588  | 0.000921 | hypermethylated |
| cg16583088 | 0.63991 | 0.88991027  | 0.475791 | 0.00049  | hypermethylated |
| cg02420027 | 0.42141 | 0.586002162 | 0.475681 | 0.005706 | hypermethylated |
| cg11062417 | 0.45546 | 0.633240541 | 0.475429 | 0.002699 | hypermethylated |
| cg15045292 | 0.32568 | 0.452774054 | 0.475336 | 0.001912 | hypermethylated |
| cg13788819 | 0.47359 | 0.658272432 | 0.475046 | 0.000123 | hypermethylated |
| cg27006947 | 0.38567 | 0.535972432 | 0.474792 | 0.00101  | hypermethylated |
| cg23889730 | 0.36243 | 0.503425405 | 0.474076 | 5.31E-05 | hypermethylated |
| cg25911551 | 0.41037 | 0.570002703 | 0.474043 | 0.018773 | hypermethylated |
| cg03421195 | 0.5336  | 0.741162703 | 0.474032 | 0.001734 | hypermethylated |
| cg20457275 | 0.31781 | 0.441356216 | 0.473779 | 0.001188 | hypermethylated |
| cg17662941 | 0.46163 | 0.641042162 | 0.473682 | 0.000143 | hypermethylated |
| cg05112120 | 0.38604 | 0.536030811 | 0.473566 | 0.003538 | hypermethylated |
| cg01023808 | 0.63857 | 0.886666486 | 0.473547 | 0.000588 | hypermethylated |
| cg26430027 | 0.49283 | 0.684123784 | 0.473167 | 3.95E-05 | hypermethylated |
| cg12577942 | 0.6261  | 0.869109189 | 0.473144 | 0.002126 | hypermethylated |
| cg01122167 | 0.4381  | 0.608054054 | 0.472939 | 0.044065 | hypermethylated |
| cg20120512 | 0.37274 | 0.517263784 | 0.472731 | 0.000123 | hypermethylated |
| cg03888064 | 0.54279 | 0.753181081 | 0.472603 | 0.000575 | hypermethylated |
| cg17039428 | 0.53083 | 0.736582162 | 0.472597 | 0.001717 | hypermethylated |
| cg07496545 | 0.58052 | 0.805447568 | 0.472445 | 0.000506 | hypermethylated |
| cg19675142 | 0.41864 | 0.580839459 | 0.472429 | 0.000174 | hypermethylated |
| cg00852921 | 0.45631 | 0.633002162 | 0.472196 | 1.94E-05 | hypermethylated |
| cg03622666 | 0.40564 | 0.562701622 | 0.47217  | 0.000588 | hypermethylated |
| cg26413683 | 0.35902 | 0.497961622 | 0.47197  | 5.86E-05 | hypermethylated |
| cg06097077 | 0.53839 | 0.74673027  | 0.471936 | 0.000517 | hypermethylated |
| cg06118571 | 0.42501 | 0.589424324 | 0.47181  | 0.000893 | hypermethylated |
| cg13435326 | 0.48443 | 0.671815676 | 0.471777 | 0.001164 | hypermethylated |
| cg20546778 | 0.57658 | 0.799391892 | 0.471382 | 0.001327 | hypermethylated |
| cg03479211 | 0.45542 | 0.631375676 | 0.471301 | 0.005411 | hypermethylated |
| cg02182210 | 0.43988 | 0.609766486 | 0.471147 | 0.000594 | hypermethylated |
| cg21167761 | 0.45776 | 0.63443027  | 0.47087  | 0.002026 | hypermethylated |
| cg00048759 | 0.46003 | 0.637456216 | 0.470598 | 1.06E-05 | hypermethylated |
| cg24768365 | 0.42329 | 0.586501622 | 0.470489 | 0.000209 | hypermethylated |
| cg07926618 | 0.5669  | 0.785297297 | 0.470145 | 0.002046 | hypermethylated |
| cg02106466 | 0.24501 | 0.339394054 | 0.470121 | 0.003705 | hypermethylated |
| cg06641366 | 0.50174 | 0.695008108 | 0.47009  | 0.018485 | hypermethylated |
| cg24497732 | 0.37347 | 0.517261081 | 0.4699   | 7.38E-05 | hypermethylated |
| cg08000731 | 0.42698 | 0.591305405 | 0.469735 | 0.005606 | hypermethylated |
| cg00061039 | 0.51698 | 0.715931892 | 0.469714 | 0.019661 | hypermethylated |
| cg22506453 | 0.59662 | 0.826047568 | 0.469413 | 0.000331 | hypermethylated |
| cg21292909 | 0.60914 | 0.84332     | 0.469306 | 0.001987 | hypermethylated |
| cg13048147 | 0.5949  | 0.823486486 | 0.469098 | 7.74E-05 | hypermethylated |
| cg05991820 | 0.45479 | 0.629518919 | 0.469049 | 0.000613 | hypermethylated |
| cg14970273 | 0.41663 | 0.576661622 | 0.468958 | 0.000797 | hypermethylated |
| cg02711479 | 0.61089 | 0.845504865 | 0.4689   | 0.000474 | hypermethylated |
| cg26206598 | 0.45335 | 0.627422703 | 0.468812 | 0.000152 | hypermethylated |
| cg18087266 | 0.34277 | 0.474359459 | 0.46874  | 0.001839 | hypermethylated |
| cg06878709 | 0.34825 | 0.48193027  | 0.468701 | 0.001275 | hypermethylated |
| cg02611934 | 0.44629 | 0.617578378 | 0.468641 | 0.001587 | hypermethylated |
| cg26363555 | 0.39411 | 0.545341622 | 0.468562 | 0.006564 | hypermethylated |
| cg12354056 | 0.50983 | 0.705445946 | 0.468519 | 0.009552 | hypermethylated |
| cg02907098 | 0.3166  | 0.438074054 | 0.468514 | 0.000219 | hypermethylated |
| cg21569714 | 0.62845 | 0.86928973  | 0.468039 | 4.82E-05 | hypermethylated |
| cg09504320 | 0.40942 | 0.566164324 | 0.467639 | 4.00E-05 | hypermethylated |
| cg27338202 | 0.55699 | 0.770199459 | 0.467581 | 0.000839 | hypermethylated |

|            |         |             |          |          |                 |
|------------|---------|-------------|----------|----------|-----------------|
| cg23831876 | 0.46562 | 0.643853514 | 0.467579 | 0.000563 | hypermethylated |
| cg24377495 | 0.46976 | 0.649530811 | 0.467474 | 0.000857 | hypermethylated |
| cg16748643 | 0.43305 | 0.59862     | 0.467107 | 0.003441 | hypermethylated |
| cg03346415 | 0.60371 | 0.834516216 | 0.467084 | 0.006395 | hypermethylated |
| cg08944086 | 0.58959 | 0.814771892 | 0.466684 | 0.014838 | hypermethylated |
| cg09096555 | 0.47133 | 0.651268649 | 0.466515 | 4.94E-05 | hypermethylated |
| cg25649039 | 0.47769 | 0.660046486 | 0.466493 | 0.024491 | hypermethylated |
| cg06146977 | 0.50147 | 0.692818378 | 0.466314 | 0.001096 | hypermethylated |
| cg20443451 | 0.40311 | 0.556827027 | 0.466056 | 0.001803 | hypermethylated |
| cg09395612 | 0.48768 | 0.673351351 | 0.465425 | 5.28E-06 | hypermethylated |
| cg05965387 | 0.43573 | 0.601586486 | 0.465338 | 0.000805 | hypermethylated |
| cg04159420 | 0.35067 | 0.484074054 | 0.465114 | 0.000191 | hypermethylated |
| cg12716639 | 0.49508 | 0.683358919 | 0.464982 | 0.003316 | hypermethylated |
| cg17789809 | 0.55785 | 0.769907568 | 0.464808 | 0.003473 | hypermethylated |
| cg07737063 | 0.66504 | 0.917615135 | 0.464448 | 0.000464 | hypermethylated |
| cg24739457 | 0.57215 | 0.789442703 | 0.464441 | 0.029023 | hypermethylated |
| cg05845376 | 0.57473 | 0.793002162 | 0.46444  | 0.001118 | hypermethylated |
| cg26820209 | 0.54341 | 0.749780541 | 0.464427 | 0.004365 | hypermethylated |
| cg23316599 | 0.40493 | 0.558707027 | 0.464419 | 9.05E-05 | hypermethylated |
| cg18690385 | 0.60908 | 0.840207568 | 0.464114 | 2.85E-05 | hypermethylated |
| cg16536855 | 0.50417 | 0.695465946 | 0.46407  | 0.000857 | hypermethylated |
| cg26634219 | 0.52411 | 0.722901622 | 0.46393  | 0.007601 | hypermethylated |
| cg12600201 | 0.43971 | 0.606479459 | 0.463906 | 0.043166 | hypermethylated |
| cg21681320 | 0.45195 | 0.62335027  | 0.46388  | 0.000912 | hypermethylated |
| cg25500028 | 0.44465 | 0.613257838 | 0.463824 | 6.62E-05 | hypermethylated |
| cg18920088 | 0.61268 | 0.844969189 | 0.463765 | 0.001164 | hypermethylated |
| cg20230340 | 0.61681 | 0.850661622 | 0.463759 | 0.005606 | hypermethylated |
| cg04250451 | 0.38306 | 0.528288108 | 0.463755 | 0.005606 | hypermethylated |
| cg24047810 | 0.36243 | 0.499803784 | 0.463659 | 0.000103 | hypermethylated |
| cg03096785 | 0.51289 | 0.707263784 | 0.463599 | 0.011274 | hypermethylated |
| cg18582342 | 0.33579 | 0.463040541 | 0.463579 | 0.000123 | hypermethylated |
| cg00654888 | 0.32263 | 0.444866486 | 0.463492 | 6.78E-05 | hypermethylated |
| cg13931725 | 0.33093 | 0.456300541 | 0.463458 | 4.31E-05 | hypermethylated |
| cg11716380 | 0.36636 | 0.505085946 | 0.463267 | 0.000268 | hypermethylated |
| cg23222169 | 0.58385 | 0.80486973  | 0.463158 | 0.008278 | hypermethylated |
| cg04153551 | 0.45616 | 0.628835135 | 0.463142 | 0.020903 | hypermethylated |
| cg19671395 | 0.64139 | 0.884138378 | 0.46307  | 0.006621 | hypermethylated |
| cg26023912 | 0.38537 | 0.531216757 | 0.463056 | 0.0017   | hypermethylated |
| cg21408915 | 0.43168 | 0.59500973  | 0.462951 | 1.30E-05 | hypermethylated |
| cg20319604 | 0.55081 | 0.759122162 | 0.462777 | 0.000667 | hypermethylated |
| cg22082800 | 0.24065 | 0.331610811 | 0.462555 | 0.003136 | hypermethylated |
| cg14644846 | 0.40748 | 0.561455676 | 0.462443 | 0.049464 | hypermethylated |
| cg07658280 | 0.52974 | 0.729892973 | 0.4624   | 0.016836 | hypermethylated |
| cg19728382 | 0.42004 | 0.578587568 | 0.462009 | 0.000163 | hypermethylated |
| cg19864468 | 0.57016 | 0.785228108 | 0.461745 | 0.000109 | hypermethylated |
| cg14364472 | 0.65042 | 0.895607568 | 0.461495 | 8.22E-05 | hypermethylated |
| cg02014853 | 0.35152 | 0.483942703 | 0.461229 | 3.76E-05 | hypermethylated |
| cg06176824 | 0.43421 | 0.597771351 | 0.461201 | 0.000126 | hypermethylated |
| cg02426178 | 0.36883 | 0.507758378 | 0.461186 | 0.003986 | hypermethylated |
| cg14738670 | 0.28739 | 0.395616216 | 0.461092 | 0.009877 | hypermethylated |
| cg13532463 | 0.49589 | 0.682401622 | 0.460601 | 0.031661 | hypermethylated |
| cg18687914 | 0.39094 | 0.537963243 | 0.46056  | 0.001096 | hypermethylated |
| cg10327980 | 0.48337 | 0.665137297 | 0.460524 | 0.000145 | hypermethylated |
| cg02269978 | 0.44064 | 0.606337838 | 0.460521 | 0.000245 | hypermethylated |
| cg05285244 | 0.41292 | 0.568167568 | 0.460454 | 0.001074 | hypermethylated |
| cg04205744 | 0.435   | 0.598469189 | 0.460262 | 0.002066 | hypermethylated |
| cg13424940 | 0.4504  | 0.619630811 | 0.460202 | 0.00032  | hypermethylated |
| cg14417099 | 0.49986 | 0.687661081 | 0.460174 | 0.002829 | hypermethylated |

|            |         |             |          |          |                 |
|------------|---------|-------------|----------|----------|-----------------|
| cg04891961 | 0.39199 | 0.539206486 | 0.460021 | 0.000187 | hypermethylated |
| cg03225520 | 0.60346 | 0.829977838 | 0.459815 | 0.000342 | hypermethylated |
| cg01835580 | 0.54806 | 0.753727568 | 0.459709 | 0.001603 | hypermethylated |
| cg13983776 | 0.27313 | 0.375618378 | 0.45968  | 3.64E-06 | hypermethylated |
| cg26720545 | 0.43606 | 0.599645405 | 0.459583 | 0.000408 | hypermethylated |
| cg05983061 | 0.34754 | 0.477915135 | 0.459575 | 0.001481 | hypermethylated |
| cg23679492 | 0.43437 | 0.597303243 | 0.459539 | 0.00099  | hypermethylated |
| cg27100471 | 0.50533 | 0.694821081 | 0.459416 | 0.006339 | hypermethylated |
| cg08285446 | 0.45783 | 0.629422162 | 0.459216 | 3.23E-05 | hypermethylated |
| cg23204968 | 0.47738 | 0.656274054 | 0.45916  | 0.004365 | hypermethylated |
| cg19821713 | 0.46005 | 0.632243243 | 0.458689 | 7.83E-06 | hypermethylated |
| cg04720592 | 0.50463 | 0.69333027  | 0.458317 | 0.001314 | hypermethylated |
| cg11943209 | 0.37323 | 0.512687568 | 0.458015 | 0.000111 | hypermethylated |
| cg00444151 | 0.45768 | 0.628646486 | 0.45791  | 0.001526 | hypermethylated |
| cg05738240 | 0.58089 | 0.797757297 | 0.457685 | 0.003378 | hypermethylated |
| cg13803688 | 0.47274 | 0.649104865 | 0.457405 | 3.07E-05 | hypermethylated |
| cg13537237 | 0.57401 | 0.788128108 | 0.457354 | 2.78E-05 | hypermethylated |
| cg05325182 | 0.48316 | 0.663353514 | 0.457277 | 0.00064  | hypermethylated |
| cg02964172 | 0.65699 | 0.901830811 | 0.456985 | 0.01951  | hypermethylated |
| cg06144718 | 0.37751 | 0.518157297 | 0.456875 | 0.000667 | hypermethylated |
| cg22701534 | 0.52594 | 0.721869189 | 0.456839 | 0.004365 | hypermethylated |
| cg02374107 | 0.44717 | 0.613744865 | 0.456816 | 0.003843 | hypermethylated |
| cg08657492 | 0.39348 | 0.539906486 | 0.456419 | 5.51E-05 | hypermethylated |
| cg01210589 | 0.48229 | 0.661757838 | 0.456402 | 5.65E-05 | hypermethylated |
| cg26937943 | 0.51768 | 0.710279459 | 0.456326 | 0.037035 | hypermethylated |
| cg18197808 | 0.58392 | 0.800906486 | 0.455863 | 0.006451 | hypermethylated |
| cg19256368 | 0.59013 | 0.809347568 | 0.455727 | 0.000386 | hypermethylated |
| cg09576209 | 0.3754  | 0.514839459 | 0.455694 | 0.0012   | hypermethylated |
| cg22911054 | 0.53266 | 0.730478919 | 0.455628 | 0.014373 | hypermethylated |
| cg08731435 | 0.66023 | 0.905307027 | 0.455438 | 1.62E-05 | hypermethylated |
| cg11452043 | 0.62076 | 0.851076757 | 0.455254 | 0.001327 | hypermethylated |
| cg10089801 | 0.39816 | 0.545788108 | 0.454993 | 0.00012  | hypermethylated |
| cg25588274 | 0.52129 | 0.714543243 | 0.454935 | 0.016187 | hypermethylated |
| cg01410359 | 0.2994  | 0.410361081 | 0.45482  | 0.000129 | hypermethylated |
| cg02950701 | 0.59131 | 0.810452973 | 0.454814 | 0.001262 | hypermethylated |
| cg06878741 | 0.47571 | 0.65196     | 0.454701 | 0.00504  | hypermethylated |
| cg17802213 | 0.36619 | 0.501825946 | 0.454595 | 0.000374 | hypermethylated |
| cg02633036 | 0.55239 | 0.756918378 | 0.454451 | 0.01348  | hypermethylated |
| cg05940452 | 0.38966 | 0.533933514 | 0.454444 | 0.000893 | hypermethylated |
| cg18912160 | 0.54806 | 0.75097027  | 0.454422 | 0.03076  | hypermethylated |
| cg10543634 | 0.61847 | 0.847311351 | 0.454189 | 0.014604 | hypermethylated |
| cg18161956 | 0.41648 | 0.570543243 | 0.454089 | 0.000426 | hypermethylated |
| cg23285825 | 0.36349 | 0.497921081 | 0.454001 | 5.25E-05 | hypermethylated |
| cg08902698 | 0.36893 | 0.505314595 | 0.453835 | 0.002231 | hypermethylated |
| cg05255351 | 0.45259 | 0.619876757 | 0.453777 | 0.000124 | hypermethylated |
| cg26679785 | 0.35196 | 0.482043243 | 0.453751 | 1.58E-05 | hypermethylated |
| cg01789499 | 0.53365 | 0.730864865 | 0.453711 | 0.000551 | hypermethylated |
| cg07380026 | 0.43566 | 0.596637838 | 0.453653 | 0.000132 | hypermethylated |
| cg24022656 | 0.5482  | 0.750615135 | 0.453371 | 0.002086 | hypermethylated |
| cg06162185 | 0.52095 | 0.71328973  | 0.453343 | 0.00101  | hypermethylated |
| cg04619046 | 0.54746 | 0.749576757 | 0.453323 | 5.93E-05 | hypermethylated |
| cg12032648 | 0.5258  | 0.719802162 | 0.453086 | 0.005316 | hypermethylated |
| cg01465769 | 0.45483 | 0.622491892 | 0.452728 | 7.84E-05 | hypermethylated |
| cg26621770 | 0.44815 | 0.613262162 | 0.452522 | 0.0002   | hypermethylated |
| cg14023291 | 0.57805 | 0.791011351 | 0.452504 | 8.83E-06 | hypermethylated |
| cg14482712 | 0.54258 | 0.742423784 | 0.452407 | 0.000187 | hypermethylated |
| cg24183575 | 0.49216 | 0.673318919 | 0.452163 | 0.002007 | hypermethylated |
| cg18605377 | 0.28203 | 0.385816757 | 0.452067 | 0.007035 | hypermethylated |

|            |         |             |          |          |                 |
|------------|---------|-------------|----------|----------|-----------------|
| cg03653317 | 0.56004 | 0.766095676 | 0.451995 | 0.00513  | hypermethylated |
| cg01454947 | 0.59259 | 0.810524865 | 0.451822 | 0.001314 | hypermethylated |
| cg22312354 | 0.44011 | 0.601876757 | 0.451604 | 0.001164 | hypermethylated |
| cg18931036 | 0.36978 | 0.505671351 | 0.451533 | 5.86E-05 | hypermethylated |
| cg05288253 | 0.34343 | 0.469560541 | 0.451295 | 0.001466 | hypermethylated |
| cg05317851 | 0.38074 | 0.520479459 | 0.451035 | 6.01E-05 | hypermethylated |
| cg25461249 | 0.49739 | 0.679909189 | 0.450965 | 0.009238 | hypermethylated |
| cg22050611 | 0.48927 | 0.668631892 | 0.450581 | 0.005859 | hypermethylated |
| cg23937382 | 0.33564 | 0.458632432 | 0.450424 | 0.0003   | hypermethylated |
| cg24587297 | 0.44574 | 0.608719459 | 0.449575 | 0.000588 | hypermethylated |
| cg11711057 | 0.45938 | 0.627326486 | 0.449528 | 0.002751 | hypermethylated |
| cg06392574 | 0.47134 | 0.643636757 | 0.449479 | 0.011649 | hypermethylated |
| cg01285926 | 0.4446  | 0.607092432 | 0.449408 | 1.99E-05 | hypermethylated |
| cg15358549 | 0.55243 | 0.754295135 | 0.449337 | 0.008636 | hypermethylated |
| cg06291314 | 0.63972 | 0.873388649 | 0.449183 | 0.001651 | hypermethylated |
| cg23008562 | 0.35588 | 0.485815135 | 0.449017 | 1.80E-05 | hypermethylated |
| cg02232089 | 0.62833 | 0.857072432 | 0.447895 | 0.001893 | hypermethylated |
| cg02172492 | 0.38553 | 0.525815676 | 0.447714 | 7.65E-05 | hypermethylated |
| cg22846776 | 0.52147 | 0.711147568 | 0.447565 | 0.004134 | hypermethylated |
| cg20770435 | 0.52144 | 0.711094595 | 0.44754  | 4.26E-05 | hypermethylated |
| cg02880877 | 0.56079 | 0.764744324 | 0.447517 | 0.000588 | hypermethylated |
| cg18926450 | 0.62391 | 0.850802162 | 0.447486 | 0.002409 | hypermethylated |
| cg22720790 | 0.49856 | 0.679837297 | 0.447422 | 0.002699 | hypermethylated |
| cg04689058 | 0.47528 | 0.648068108 | 0.447368 | 0.00039  | hypermethylated |
| cg12085698 | 0.60838 | 0.829498378 | 0.447266 | 0.00101  | hypermethylated |
| cg10297617 | 0.56577 | 0.771317838 | 0.44711  | 0.005411 | hypermethylated |
| cg01522592 | 0.45888 | 0.625560541 | 0.447033 | 0.00035  | hypermethylated |
| cg22884541 | 0.59355 | 0.809094595 | 0.446939 | 0.005706 | hypermethylated |
| cg25693769 | 0.46759 | 0.63736973  | 0.446886 | 2.10E-05 | hypermethylated |
| cg15967709 | 0.32048 | 0.436841081 | 0.446874 | 1.75E-05 | hypermethylated |
| cg25841625 | 0.46662 | 0.635875135 | 0.446495 | 0.003571 | hypermethylated |
| cg05355757 | 0.49597 | 0.675796757 | 0.446337 | 0.00032  | hypermethylated |
| cg06872981 | 0.34548 | 0.470681081 | 0.446148 | 0.000342 | hypermethylated |
| cg03579904 | 0.54953 | 0.748622703 | 0.446041 | 0.004526 | hypermethylated |
| cg24279017 | 0.42076 | 0.573171892 | 0.44597  | 0.000741 | hypermethylated |
| cg16677112 | 0.48974 | 0.667023243 | 0.445721 | 0.017101 | hypermethylated |
| cg17762554 | 0.50169 | 0.683234054 | 0.445584 | 0.000142 | hypermethylated |
| cg10381113 | 0.63173 | 0.860268108 | 0.445478 | 3.85E-05 | hypermethylated |
| cg07506916 | 0.43453 | 0.591724324 | 0.445469 | 0.001212 | hypermethylated |
| cg25390165 | 0.42187 | 0.574261081 | 0.444908 | 0.001667 | hypermethylated |
| cg01790083 | 0.3588  | 0.488404324 | 0.444896 | 0.007096 | hypermethylated |
| cg11624345 | 0.34111 | 0.46428973  | 0.444788 | 0.002803 | hypermethylated |
| cg04329125 | 0.46531 | 0.633287568 | 0.444669 | 0.001651 | hypermethylated |
| cg14424407 | 0.30705 | 0.417848108 | 0.444505 | 0.000132 | hypermethylated |
| cg26767593 | 0.5337  | 0.726248649 | 0.444435 | 0.002409 | hypermethylated |
| cg10329579 | 0.49884 | 0.678755676 | 0.444315 | 0.019213 | hypermethylated |
| cg08828036 | 0.51092 | 0.69516     | 0.444248 | 0.001409 | hypermethylated |
| cg01631277 | 0.61998 | 0.843511351 | 0.444186 | 0.004863 | hypermethylated |
| cg00347620 | 0.40081 | 0.545252973 | 0.444007 | 3.71E-05 | hypermethylated |
| cg06306791 | 0.42067 | 0.572176757 | 0.443772 | 0.023769 | hypermethylated |
| cg14547895 | 0.41491 | 0.564301622 | 0.443668 | 0.002231 | hypermethylated |
| cg12635937 | 0.36971 | 0.502763784 | 0.443487 | 8.84E-05 | hypermethylated |
| cg26540191 | 0.59089 | 0.803522703 | 0.443449 | 0.001496 | hypermethylated |
| cg24442760 | 0.37035 | 0.503560541 | 0.443276 | 3.71E-05 | hypermethylated |
| cg08292467 | 0.38451 | 0.522761081 | 0.443131 | 0.0002   | hypermethylated |
| cg20087519 | 0.43656 | 0.593482703 | 0.443026 | 0.000262 | hypermethylated |
| cg04865220 | 0.55393 | 0.752811351 | 0.442585 | 0.001571 | hypermethylated |
| cg03630821 | 0.43408 | 0.589765946 | 0.442182 | 0.000789 | hypermethylated |

|            |         |             |          |          |                 |
|------------|---------|-------------|----------|----------|-----------------|
| cg13512268 | 0.49888 | 0.677662703 | 0.441875 | 0.002751 | hypermethylated |
| cg07231479 | 0.35414 | 0.481007568 | 0.44174  | 2.45E-05 | hypermethylated |
| cg10909790 | 0.49095 | 0.666658919 | 0.441373 | 0.000268 | hypermethylated |
| cg00324748 | 0.54001 | 0.732954054 | 0.440737 | 0.020903 | hypermethylated |
| cg26132493 | 0.43313 | 0.58773027  | 0.440354 | 5.58E-05 | hypermethylated |
| cg03695871 | 0.55449 | 0.752407027 | 0.440352 | 0.007035 | hypermethylated |
| cg18656708 | 0.34646 | 0.470078919 | 0.440214 | 6.75E-06 | hypermethylated |
| cg17120366 | 0.5755  | 0.780838919 | 0.440209 | 0.004059 | hypermethylated |
| cg09974780 | 0.48015 | 0.651359459 | 0.439969 | 0.001452 | hypermethylated |
| cg11574745 | 0.56097 | 0.760977297 | 0.43993  | 2.21E-05 | hypermethylated |
| cg22671717 | 0.34495 | 0.46792973  | 0.439905 | 0.000248 | hypermethylated |
| cg23224191 | 0.33953 | 0.460543243 | 0.439798 | 0.001395 | hypermethylated |
| cg13857947 | 0.51813 | 0.702797297 | 0.439795 | 0.001164 | hypermethylated |
| cg13663855 | 0.51724 | 0.701558378 | 0.439729 | 0.000287 | hypermethylated |
| cg02281167 | 0.32066 | 0.434923243 | 0.439716 | 9.83E-05 | hypermethylated |
| cg01281904 | 0.40494 | 0.549216757 | 0.439667 | 0.000575 | hypermethylated |
| cg18080733 | 0.48858 | 0.662634595 | 0.439619 | 0.008208 | hypermethylated |
| cg26782150 | 0.49512 | 0.671476757 | 0.439559 | 0.016061 | hypermethylated |
| cg27019093 | 0.61928 | 0.83980973  | 0.439471 | 0.000148 | hypermethylated |
| cg04856896 | 0.47446 | 0.643223784 | 0.439034 | 0.003195 | hypermethylated |
| cg15689969 | 0.64255 | 0.870986486 | 0.438842 | 0.000469 | hypermethylated |
| cg16294838 | 0.56173 | 0.761406486 | 0.43879  | 0.010211 | hypermethylated |
| cg09178678 | 0.34556 | 0.468388108 | 0.438768 | 2.27E-05 | hypermethylated |
| cg09099868 | 0.46592 | 0.631492973 | 0.438684 | 4.15E-05 | hypermethylated |
| cg05579037 | 0.54563 | 0.739477297 | 0.438583 | 0.000688 | hypermethylated |
| cg00274203 | 0.48225 | 0.653456216 | 0.438309 | 0.001    | hypermethylated |
| cg08056229 | 0.61187 | 0.829077297 | 0.438281 | 0.000563 | hypermethylated |
| cg27408345 | 0.63347 | 0.857786486 | 0.437342 | 0.001786 | hypermethylated |
| cg09596722 | 0.62377 | 0.844574054 | 0.43721  | 0.005316 | hypermethylated |
| cg25750507 | 0.55674 | 0.753805405 | 0.437188 | 0.007933 | hypermethylated |
| cg15362957 | 0.4231  | 0.572774595 | 0.436969 | 0.000137 | hypermethylated |
| cg14848450 | 0.54405 | 0.736511351 | 0.436969 | 0.029449 | hypermethylated |
| cg04419883 | 0.34457 | 0.466410811 | 0.436804 | 0.012036 | hypermethylated |
| cg23528791 | 0.3658  | 0.495098378 | 0.43666  | 5.45E-05 | hypermethylated |
| cg20050826 | 0.33014 | 0.446798919 | 0.436548 | 0.000251 | hypermethylated |
| cg14912034 | 0.48948 | 0.662376757 | 0.436402 | 0.004863 | hypermethylated |
| cg21928406 | 0.46531 | 0.629621081 | 0.436292 | 1.73E-05 | hypermethylated |
| cg02641288 | 0.34507 | 0.466873514 | 0.436143 | 2.42E-05 | hypermethylated |
| cg25008858 | 0.34741 | 0.470031351 | 0.436118 | 0.000159 | hypermethylated |
| cg09938049 | 0.34234 | 0.463143243 | 0.436029 | 0.003637 | hypermethylated |
| cg17588578 | 0.4048  | 0.547641081 | 0.436021 | 0.000931 | hypermethylated |
| cg17250160 | 0.47364 | 0.640763243 | 0.436    | 3.57E-05 | hypermethylated |
| cg02205073 | 0.44806 | 0.606131351 | 0.435939 | 0.018773 | hypermethylated |
| cg26382551 | 0.51526 | 0.697021081 | 0.435902 | 0.004134 | hypermethylated |
| cg25981315 | 0.44068 | 0.596076757 | 0.435767 | 0.003473 | hypermethylated |
| cg00449067 | 0.51394 | 0.695164865 | 0.435755 | 0.00028  | hypermethylated |
| cg21795221 | 0.40094 | 0.542261622 | 0.435603 | 0.001949 | hypermethylated |
| cg07592254 | 0.6014  | 0.813333514 | 0.435522 | 0.000875 | hypermethylated |
| cg00144335 | 0.43357 | 0.586263243 | 0.435284 | 9.49E-05 | hypermethylated |
| cg11562901 | 0.55006 | 0.743746486 | 0.435222 | 0.002147 | hypermethylated |
| cg22367264 | 0.4816  | 0.651176757 | 0.435214 | 0.000696 | hypermethylated |
| cg09194815 | 0.66282 | 0.896184324 | 0.435178 | 0.001096 | hypermethylated |
| cg26735980 | 0.45397 | 0.613728649 | 0.435004 | 0.024675 | hypermethylated |
| cg27293357 | 0.49764 | 0.672735676 | 0.434937 | 0.000417 | hypermethylated |
| cg02775230 | 0.57624 | 0.778930811 | 0.434825 | 0.011181 | hypermethylated |
| cg25773262 | 0.41126 | 0.555917838 | 0.434821 | 2.89E-05 | hypermethylated |
| cg01514490 | 0.47442 | 0.641152973 | 0.434504 | 0.001368 | hypermethylated |
| cg13210467 | 0.43564 | 0.588574054 | 0.434088 | 4.05E-05 | hypermethylated |

|            |         |             |          |          |                 |
|------------|---------|-------------|----------|----------|-----------------|
| cg17517296 | 0.3725  | 0.503218378 | 0.433944 | 9.16E-05 | hypermethylated |
| cg19847945 | 0.40996 | 0.553778378 | 0.433826 | 0.015935 | hypermethylated |
| cg24553170 | 0.4152  | 0.560807568 | 0.433699 | 0.002318 | hypermethylated |
| cg07703530 | 0.57363 | 0.774739459 | 0.433591 | 0.000875 | hypermethylated |
| cg01417692 | 0.69787 | 0.942508649 | 0.433548 | 0.000695 | hypermethylated |
| cg00902516 | 0.64051 | 0.864998378 | 0.433476 | 0.000696 | hypermethylated |
| cg27635470 | 0.59845 | 0.808121081 | 0.433341 | 0.000212 | hypermethylated |
| cg12497374 | 0.36528 | 0.493177838 | 0.433105 | 0.000324 | hypermethylated |
| cg02022519 | 0.43239 | 0.583773514 | 0.433076 | 0.001452 | hypermethylated |
| cg19023320 | 0.45311 | 0.611653514 | 0.432853 | 0.012844 | hypermethylated |
| cg19095000 | 0.50835 | 0.686170811 | 0.432746 | 0.000108 | hypermethylated |
| cg18466173 | 0.55719 | 0.752068108 | 0.432694 | 0.002599 | hypermethylated |
| cg20852557 | 0.4564  | 0.616008649 | 0.432652 | 0.006451 | hypermethylated |
| cg16179589 | 0.55613 | 0.750598378 | 0.432619 | 0.001164 | hypermethylated |
| cg12948920 | 0.32368 | 0.436823784 | 0.432483 | 0.000113 | hypermethylated |
| cg13187827 | 0.38912 | 0.525115135 | 0.432419 | 0.003473 | hypermethylated |
| cg24874557 | 0.54197 | 0.73132     | 0.43229  | 0.004819 | hypermethylated |
| cg14624314 | 0.55378 | 0.747227027 | 0.432234 | 0.002318 | hypermethylated |
| cg05616010 | 0.46949 | 0.633307568 | 0.431812 | 0.000474 | hypermethylated |
| cg17592231 | 0.40971 | 0.552640541 | 0.431738 | 8.60E-06 | hypermethylated |
| cg09354454 | 0.3723  | 0.502135135 | 0.43161  | 0.0006   | hypermethylated |
| cg22108374 | 0.439   | 0.592051351 | 0.431501 | 0.000182 | hypermethylated |
| cg06539116 | 0.37117 | 0.500540541 | 0.431407 | 0.000789 | hypermethylated |
| cg08295111 | 0.43636 | 0.588428108 | 0.431347 | 0.004691 | hypermethylated |
| cg16830930 | 0.37526 | 0.50598     | 0.43119  | 3.32E-05 | hypermethylated |
| cg16246661 | 0.59254 | 0.798907568 | 0.431116 | 0.001635 | hypermethylated |
| cg16236779 | 0.61865 | 0.834075135 | 0.431054 | 0.00101  | hypermethylated |
| cg22849665 | 0.46053 | 0.620812432 | 0.430862 | 6.86E-05 | hypermethylated |
| cg23143313 | 0.39282 | 0.529494595 | 0.430748 | 9.05E-05 | hypermethylated |
| cg04213746 | 0.54978 | 0.741057297 | 0.430731 | 0.004445 | hypermethylated |
| cg01119875 | 0.46695 | 0.629336757 | 0.430564 | 0.00134  | hypermethylated |
| cg08553601 | 0.44721 | 0.602720541 | 0.430537 | 0.001237 | hypermethylated |
| cg03143486 | 0.57192 | 0.770647568 | 0.430258 | 0.000224 | hypermethylated |
| cg17147317 | 0.37882 | 0.510343784 | 0.429957 | 0.000112 | hypermethylated |
| cg17124583 | 0.33779 | 0.455061081 | 0.429934 | 0.00101  | hypermethylated |
| cg05029822 | 0.33095 | 0.445836216 | 0.429901 | 3.67E-05 | hypermethylated |
| cg09835408 | 0.48463 | 0.652858919 | 0.429888 | 1.66E-05 | hypermethylated |
| cg02578944 | 0.51649 | 0.69575027  | 0.429829 | 0.000408 | hypermethylated |
| cg24683222 | 0.51325 | 0.691167568 | 0.429374 | 5.86E-05 | hypermethylated |
| cg05487664 | 0.34839 | 0.469151892 | 0.429352 | 7.65E-05 | hypermethylated |
| cg17522727 | 0.5754  | 0.774828108 | 0.429311 | 0.007536 | hypermethylated |
| cg21641458 | 0.43929 | 0.591537297 | 0.429295 | 0.0017   | hypermethylated |
| cg20826165 | 0.55059 | 0.741403784 | 0.429281 | 0.006796 | hypermethylated |
| cg06732684 | 0.37438 | 0.504093514 | 0.429188 | 3.67E-05 | hypermethylated |
| cg18543991 | 0.57802 | 0.778283243 | 0.429176 | 0.004365 | hypermethylated |
| cg27345762 | 0.54956 | 0.739962162 | 0.429174 | 0.009238 | hypermethylated |
| cg08415977 | 0.38171 | 0.513878919 | 0.428951 | 7.84E-05 | hypermethylated |
| cg08446824 | 0.6072  | 0.817355135 | 0.428791 | 0.001452 | hypermethylated |
| cg10013501 | 0.48728 | 0.655924324 | 0.428778 | 0.01073  | hypermethylated |
| cg01952185 | 0.3463  | 0.466107027 | 0.428639 | 0.000741 | hypermethylated |
| cg04904318 | 0.67148 | 0.903712973 | 0.42852  | 0.001821 | hypermethylated |
| cg15512534 | 0.49266 | 0.662869189 | 0.428132 | 0.002066 | hypermethylated |
| cg17775765 | 0.40848 | 0.549601622 | 0.428121 | 8.83E-06 | hypermethylated |
| cg15833565 | 0.5023  | 0.675808649 | 0.428066 | 0.000102 | hypermethylated |
| cg09915729 | 0.56788 | 0.764016216 | 0.428017 | 0.020274 | hypermethylated |
| cg04060571 | 0.34335 | 0.461917297 | 0.427955 | 0.000374 | hypermethylated |
| cg11100481 | 0.43239 | 0.581676757 | 0.427884 | 0.000756 | hypermethylated |
| cg00254306 | 0.38965 | 0.524144865 | 0.427787 | 0.000176 | hypermethylated |



|            |         |             |          |          |                 |
|------------|---------|-------------|----------|----------|-----------------|
| cg06584433 | 0.58781 | 0.790682703 | 0.427749 | 0.000408 | hypermethylated |
| cg01316476 | 0.49805 | 0.669940541 | 0.427742 | 0.000109 | hypermethylated |
| cg25331919 | 0.60626 | 0.815491892 | 0.427734 | 0.000557 | hypermethylated |
| cg12954234 | 0.43395 | 0.583632432 | 0.427531 | 0.008208 | hypermethylated |
| cg01342411 | 0.68102 | 0.915878378 | 0.427459 | 7.29E-05 | hypermethylated |
| cg11956467 | 0.53678 | 0.721869189 | 0.427407 | 0.005859 | hypermethylated |
| cg20416874 | 0.47893 | 0.643998378 | 0.427242 | 0.013053 | hypermethylated |
| cg01096617 | 0.61469 | 0.82654     | 0.427226 | 0.022893 | hypermethylated |
| cg11041817 | 0.52372 | 0.704181081 | 0.427151 | 0.001912 | hypermethylated |
| cg19596468 | 0.4861  | 0.653584865 | 0.427121 | 3.76E-05 | hypermethylated |
| cg06055845 | 0.41261 | 0.554747568 | 0.427053 | 0.000378 | hypermethylated |
| cg21618730 | 0.53363 | 0.71742973  | 0.426998 | 3.07E-05 | hypermethylated |
| cg15868425 | 0.55383 | 0.744545946 | 0.426918 | 8.63E-05 | hypermethylated |
| cg05339076 | 0.62801 | 0.844240541 | 0.426867 | 9.72E-05 | hypermethylated |
| cg13007988 | 0.5664  | 0.761371892 | 0.42678  | 0.015076 | hypermethylated |
| cg11847933 | 0.41336 | 0.555561081 | 0.426547 | 0.00048  | hypermethylated |
| cg21870668 | 0.44734 | 0.601218919 | 0.426519 | 0.000224 | hypermethylated |
| cg20917338 | 0.62784 | 0.843794595 | 0.426495 | 0.000445 | hypermethylated |
| cg15966151 | 0.45945 | 0.617483784 | 0.426493 | 0.001734 | hypermethylated |
| cg19294953 | 0.39447 | 0.530148649 | 0.426481 | 0.000117 | hypermethylated |
| cg23350904 | 0.41086 | 0.552057838 | 0.426173 | 0.000106 | hypermethylated |
| cg06733394 | 0.5315  | 0.713989189 | 0.425833 | 0.010296 | hypermethylated |
| cg13599092 | 0.35576 | 0.477875135 | 0.425729 | 0.000193 | hypermethylated |
| cg08274637 | 0.44159 | 0.593008649 | 0.425346 | 0.00125  | hypermethylated |
| cg11085454 | 0.31824 | 0.427357838 | 0.425329 | 0.004567 | hypermethylated |
| cg14882265 | 0.42677 | 0.57305027  | 0.425203 | 0.001912 | hypermethylated |
| cg00031105 | 0.42357 | 0.568724324 | 0.425129 | 0.015809 | hypermethylated |
| cg16257029 | 0.37001 | 0.496734054 | 0.424909 | 5.86E-05 | hypermethylated |
| cg14440640 | 0.41707 | 0.559837838 | 0.424719 | 0.000726 | hypermethylated |
| cg05713044 | 0.62418 | 0.837832973 | 0.424701 | 0.007408 | hypermethylated |
| cg06036239 | 0.42514 | 0.570589189 | 0.424514 | 0.016704 | hypermethylated |
| cg02141570 | 0.37287 | 0.500387568 | 0.424373 | 8.63E-05 | hypermethylated |
| cg21639031 | 0.30116 | 0.404123243 | 0.424265 | 0.001368 | hypermethylated |
| cg21615397 | 0.6216  | 0.834067027 | 0.424177 | 0.00305  | hypermethylated |
| cg04521583 | 0.433   | 0.580980541 | 0.424123 | 0.024309 | hypermethylated |
| cg24457118 | 0.58154 | 0.780222703 | 0.424008 | 0.000109 | hypermethylated |
| cg03550129 | 0.40659 | 0.545443243 | 0.423854 | 0.001912 | hypermethylated |
| cg15418593 | 0.468   | 0.627795676 | 0.423787 | 0.004134 | hypermethylated |
| cg23337631 | 0.43854 | 0.588227027 | 0.423665 | 0.000696 | hypermethylated |
| cg09636525 | 0.5119  | 0.686476216 | 0.423348 | 0.006284 | hypermethylated |
| cg26353287 | 0.6425  | 0.861614054 | 0.423345 | 0.001212 | hypermethylated |
| cg18597315 | 0.64708 | 0.867685405 | 0.423228 | 0.001118 | hypermethylated |
| cg05333149 | 0.5158  | 0.691637838 | 0.423205 | 0.000219 | hypermethylated |
| cg18266783 | 0.4867  | 0.652494054 | 0.422932 | 0.01274  | hypermethylated |
| cg01143938 | 0.37851 | 0.507373514 | 0.422717 | 0.001667 | hypermethylated |
| cg25592918 | 0.47975 | 0.643076216 | 0.422707 | 0.000274 | hypermethylated |
| cg25103417 | 0.4353  | 0.583443784 | 0.422584 | 0.00032  | hypermethylated |
| cg23722790 | 0.49787 | 0.667307568 | 0.422583 | 0.004819 | hypermethylated |
| cg08802358 | 0.52413 | 0.702361081 | 0.422288 | 0.000495 | hypermethylated |
| cg07255841 | 0.48148 | 0.645050811 | 0.421937 | 0.000485 | hypermethylated |
| cg22302929 | 0.46937 | 0.628772432 | 0.421812 | 0.006122 | hypermethylated |
| cg15037137 | 0.50941 | 0.682358378 | 0.421702 | 0.009238 | hypermethylated |
| cg23121787 | 0.58537 | 0.784067568 | 0.421629 | 0.007601 | hypermethylated |
| cg22517388 | 0.36332 | 0.486631351 | 0.421588 | 2.24E-05 | hypermethylated |
| cg00495201 | 0.56688 | 0.759274054 | 0.421577 | 0.000902 | hypermethylated |
| cg00144673 | 0.44477 | 0.595717838 | 0.42157  | 0.004405 | hypermethylated |
| cg03908391 | 0.54025 | 0.723511892 | 0.42139  | 6.78E-05 | hypermethylated |
| cg06511276 | 0.47496 | 0.636041622 | 0.421315 | 0.000148 | hypermethylated |

|            |         |             |          |          |                 |
|------------|---------|-------------|----------|----------|-----------------|
| cg16122424 | 0.45165 | 0.604776216 | 0.421196 | 6.62E-05 | hypermethylated |
| cg04536844 | 0.47455 | 0.635363784 | 0.421023 | 0.000234 | hypermethylated |
| cg04489066 | 0.60478 | 0.809722162 | 0.421017 | 0.002126 | hypermethylated |
| cg05697976 | 0.55491 | 0.742951351 | 0.421014 | 0.000822 | hypermethylated |
| cg00513316 | 0.39127 | 0.523835135 | 0.420948 | 0.000126 | hypermethylated |
| cg11232245 | 0.56323 | 0.75402973  | 0.420897 | 0.003286 | hypermethylated |
| cg12075498 | 0.5473  | 0.732483784 | 0.420465 | 0.000485 | hypermethylated |
| cg20839206 | 0.45865 | 0.61376973  | 0.420304 | 2.74E-05 | hypermethylated |
| cg27129048 | 0.42888 | 0.573890811 | 0.420202 | 0.000417 | hypermethylated |
| cg21158528 | 0.53892 | 0.721121081 | 0.42017  | 0.003166 | hypermethylated |
| cg10534873 | 0.60138 | 0.804667027 | 0.420115 | 0.001839 | hypermethylated |
| cg20763327 | 0.51617 | 0.690457297 | 0.419706 | 0.001074 | hypermethylated |
| cg23290121 | 0.46281 | 0.619045946 | 0.419626 | 0.000123 | hypermethylated |
| cg22805603 | 0.4688  | 0.626864324 | 0.419181 | 0.000772 | hypermethylated |
| cg22352800 | 0.38617 | 0.516374054 | 0.41918  | 0.000575 | hypermethylated |
| cg16770238 | 0.40572 | 0.542490811 | 0.419114 | 6.95E-05 | hypermethylated |
| cg24399349 | 0.4089  | 0.546737297 | 0.4191   | 6.95E-05 | hypermethylated |
| cg21206652 | 0.33844 | 0.452517297 | 0.419073 | 0.007799 | hypermethylated |
| cg10856812 | 0.50988 | 0.681700541 | 0.41898  | 0.009959 | hypermethylated |
| cg10553204 | 0.55397 | 0.740598919 | 0.418885 | 0.00024  | hypermethylated |
| cg12268562 | 0.38719 | 0.517601081 | 0.418799 | 3.07E-05 | hypermethylated |
| cg18466162 | 0.61922 | 0.827622162 | 0.41852  | 0.000822 | hypermethylated |
| cg10274108 | 0.55823 | 0.746065946 | 0.418443 | 5.19E-05 | hypermethylated |
| cg05478407 | 0.46647 | 0.623412973 | 0.418404 | 3.40E-05 | hypermethylated |
| cg14935646 | 0.45253 | 0.604777297 | 0.418391 | 0.003378 | hypermethylated |
| cg13399544 | 0.42336 | 0.565720541 | 0.418205 | 0.001587 | hypermethylated |
| cg09287629 | 0.41213 | 0.55070973  | 0.418193 | 4.05E-05 | hypermethylated |
| cg16583552 | 0.52126 | 0.696471892 | 0.418062 | 0.008348 | hypermethylated |
| cg27269962 | 0.52021 | 0.694871892 | 0.417653 | 2.10E-05 | hypermethylated |
| cg21649013 | 0.35917 | 0.479717297 | 0.417518 | 0.000274 | hypermethylated |
| cg09598437 | 0.39908 | 0.532873514 | 0.417115 | 0.030317 | hypermethylated |
| cg08485158 | 0.56396 | 0.753007568 | 0.417072 | 0.000245 | hypermethylated |
| cg23149064 | 0.3338  | 0.445660541 | 0.416961 | 5.97E-06 | hypermethylated |
| cg11696388 | 0.3996  | 0.533488108 | 0.4169   | 0.002231 | hypermethylated |
| cg16535788 | 0.57299 | 0.764947568 | 0.416851 | 0.00099  | hypermethylated |
| cg17437640 | 0.35376 | 0.472201081 | 0.41663  | 0.0003   | hypermethylated |
| cg18087477 | 0.4739  | 0.63253027  | 0.416552 | 0.000185 | hypermethylated |
| cg11054816 | 0.51943 | 0.693242703 | 0.416431 | 0.016836 | hypermethylated |
| cg15662251 | 0.3729  | 0.497628649 | 0.416281 | 0.000464 | hypermethylated |
| cg03200571 | 0.56287 | 0.75113027  | 0.416261 | 0.008069 | hypermethylated |
| cg13336665 | 0.45622 | 0.608756216 | 0.416135 | 0.000893 | hypermethylated |
| cg03585720 | 0.61621 | 0.821939459 | 0.41561  | 0.001987 | hypermethylated |
| cg06898168 | 0.45748 | 0.610198919 | 0.415571 | 1.01E-05 | hypermethylated |
| cg02556634 | 0.3841  | 0.512269189 | 0.41542  | 0.000523 | hypermethylated |
| cg06475633 | 0.58625 | 0.781784865 | 0.415256 | 0.009877 | hypermethylated |
| cg14078730 | 0.50165 | 0.668934595 | 0.415184 | 0.002274 | hypermethylated |
| cg03295417 | 0.50561 | 0.67408973  | 0.414916 | 0.000242 | hypermethylated |
| cg03321020 | 0.37472 | 0.499581081 | 0.414906 | 0.000187 | hypermethylated |
| cg19895185 | 0.53452 | 0.712598378 | 0.414845 | 0.000313 | hypermethylated |
| cg08422054 | 0.50477 | 0.67290973  | 0.414787 | 0.003255 | hypermethylated |
| cg05768047 | 0.53417 | 0.712083784 | 0.414748 | 0.001603 | hypermethylated |
| cg06837568 | 0.5122  | 0.682755676 | 0.414662 | 0.000209 | hypermethylated |
| cg12699647 | 0.61921 | 0.825367568 | 0.414608 | 0.000277 | hypermethylated |
| cg04214370 | 0.67207 | 0.895769189 | 0.414516 | 0.005706 | hypermethylated |
| cg00366531 | 0.41479 | 0.552847568 | 0.414501 | 1.84E-05 | hypermethylated |
| cg23992403 | 0.66433 | 0.885307568 | 0.414279 | 0.003637 | hypermethylated |
| cg05476956 | 0.38055 | 0.507094595 | 0.414169 | 0.000226 | hypermethylated |
| cg02306798 | 0.6114  | 0.81464973  | 0.414063 | 0.000209 | hypermethylated |

|            |         |             |          |          |                 |
|------------|---------|-------------|----------|----------|-----------------|
| cg04913803 | 0.45167 | 0.601804865 | 0.414027 | 0.004287 | hypermethylated |
| cg00162806 | 0.44744 | 0.596150811 | 0.413983 | 0.005223 | hypermethylated |
| cg04682699 | 0.47357 | 0.630949189 | 0.413946 | 0.014604 | hypermethylated |
| cg26345105 | 0.45631 | 0.607943784 | 0.413924 | 7.84E-05 | hypermethylated |
| cg08615333 | 0.46938 | 0.625336216 | 0.413876 | 0.017781 | hypermethylated |
| cg17527819 | 0.49861 | 0.664014595 | 0.413303 | 4.12E-06 | hypermethylated |
| cg01615333 | 0.3445  | 0.458707027 | 0.413069 | 0.00017  | hypermethylated |
| cg13840445 | 0.46028 | 0.612808649 | 0.412925 | 0.000327 | hypermethylated |
| cg25985013 | 0.36933 | 0.491687027 | 0.41283  | 0.001768 | hypermethylated |
| cg21855816 | 0.58923 | 0.784297838 | 0.412571 | 0.000875 | hypermethylated |
| cg17074989 | 0.57764 | 0.768852432 | 0.412536 | 0.003136 | hypermethylated |
| cg14737994 | 0.49437 | 0.657995676 | 0.412487 | 0.000495 | hypermethylated |
| cg05785989 | 0.47018 | 0.625721081 | 0.412307 | 2.92E-05 | hypermethylated |
| cg01618923 | 0.51695 | 0.687872973 | 0.412117 | 0.012638 | hypermethylated |
| cg21221690 | 0.50692 | 0.674494595 | 0.412049 | 0.010211 | hypermethylated |
| cg11685223 | 0.38908 | 0.517643243 | 0.411891 | 0.008636 | hypermethylated |
| cg17181598 | 0.68561 | 0.912155135 | 0.411891 | 0.00193  | hypermethylated |
| cg23889772 | 0.34323 | 0.456603784 | 0.411767 | 0.001085 | hypermethylated |
| cg22506548 | 0.57494 | 0.764848108 | 0.411762 | 0.0017   | hypermethylated |
| cg17804611 | 0.50504 | 0.671788649 | 0.41161  | 0.002274 | hypermethylated |
| cg12524640 | 0.41721 | 0.554926486 | 0.411523 | 0.003021 | hypermethylated |
| cg16170346 | 0.44258 | 0.588652973 | 0.411479 | 0.000756 | hypermethylated |
| cg08498179 | 0.64478 | 0.857574595 | 0.411455 | 0.001275 | hypermethylated |
| cg05134019 | 0.6103  | 0.811698919 | 0.411426 | 0.007666 | hypermethylated |
| cg27338807 | 0.55665 | 0.740322703 | 0.411384 | 0.004526 | hypermethylated |
| cg11197630 | 0.53139 | 0.706657838 | 0.411241 | 0.000557 | hypermethylated |
| cg09895822 | 0.55981 | 0.744338919 | 0.411022 | 0.000327 | hypermethylated |
| cg01881549 | 0.52837 | 0.70250973  | 0.41097  | 0.019361 | hypermethylated |
| cg11438039 | 0.55623 | 0.739507027 | 0.410882 | 0.000469 | hypermethylated |
| cg14691596 | 0.40743 | 0.541608108 | 0.410697 | 0.000132 | hypermethylated |
| cg26109568 | 0.62498 | 0.830723243 | 0.410558 | 0.003316 | hypermethylated |
| cg08149747 | 0.58167 | 0.773145405 | 0.410539 | 0.004566 | hypermethylated |
| cg04910970 | 0.42461 | 0.564356216 | 0.410468 | 0.00012  | hypermethylated |
| cg24401487 | 0.50085 | 0.665678919 | 0.410448 | 0.000104 | hypermethylated |
| cg01684248 | 0.38772 | 0.515295135 | 0.410384 | 0.000575 | hypermethylated |
| cg16805094 | 0.58142 | 0.772728108 | 0.41038  | 8.63E-05 | hypermethylated |
| cg17166338 | 0.53127 | 0.706021081 | 0.410266 | 0.001511 | hypermethylated |
| cg04330881 | 0.52931 | 0.703366486 | 0.410164 | 0.000464 | hypermethylated |
| cg08238265 | 0.64308 | 0.854419459 | 0.409946 | 0.002478 | hypermethylated |
| cg08200869 | 0.40726 | 0.54108     | 0.409892 | 0.00012  | hypermethylated |
| cg11160362 | 0.32957 | 0.437805946 | 0.409707 | 2.61E-05 | hypermethylated |
| cg18237616 | 0.57268 | 0.760645405 | 0.409495 | 0.035497 | hypermethylated |
| cg03111114 | 0.36136 | 0.479963784 | 0.409489 | 0.000653 | hypermethylated |
| cg08473752 | 0.59588 | 0.791416216 | 0.409415 | 0.000145 | hypermethylated |
| cg15194163 | 0.35332 | 0.469255676 | 0.409399 | 3.39E-06 | hypermethylated |
| cg15209808 | 0.45055 | 0.59834973  | 0.409302 | 9.49E-05 | hypermethylated |
| cg24607283 | 0.5008  | 0.665045946 | 0.409219 | 0.000178 | hypermethylated |
| cg13876553 | 0.60907 | 0.80877027  | 0.409122 | 0.017101 | hypermethylated |
| cg19542346 | 0.44368 | 0.589128649 | 0.409063 | 0.000283 | hypermethylated |
| cg27460824 | 0.63392 | 0.841680541 | 0.408972 | 0.000202 | hypermethylated |
| cg00058923 | 0.632   | 0.839112973 | 0.408941 | 0.00098  | hypermethylated |
| cg07022343 | 0.40644 | 0.539594595 | 0.408834 | 0.016836 | hypermethylated |
| cg00744431 | 0.39456 | 0.523803784 | 0.408782 | 0.000653 | hypermethylated |
| cg21251230 | 0.51879 | 0.688725405 | 0.408778 | 0.016444 | hypermethylated |
| cg16685313 | 0.58436 | 0.775657838 | 0.408563 | 0.002086 | hypermethylated |
| cg00985983 | 0.44139 | 0.58582     | 0.408404 | 0.00341  | hypermethylated |
| cg14990413 | 0.47167 | 0.625902162 | 0.408159 | 0.008348 | hypermethylated |
| cg20310894 | 0.44057 | 0.584601081 | 0.408081 | 0.000117 | hypermethylated |

|            |         |             |          |          |                 |
|------------|---------|-------------|----------|----------|-----------------|
| cg19788941 | 0.41886 | 0.555759459 | 0.407992 | 0.00255  | hypermethylated |
| cg16700555 | 0.59473 | 0.789023243 | 0.407833 | 0.007799 | hypermethylated |
| cg13583664 | 0.46918 | 0.622390811 | 0.407679 | 0.02988  | hypermethylated |
| cg12475507 | 0.40407 | 0.535958919 | 0.407517 | 9.95E-05 | hypermethylated |
| cg23164076 | 0.51108 | 0.677847027 | 0.407411 | 0.000449 | hypermethylated |
| cg17113147 | 0.59758 | 0.79252973  | 0.407333 | 0.009315 | hypermethylated |
| cg03608520 | 0.38465 | 0.510131351 | 0.407322 | 0.002341 | hypermethylated |
| cg17744883 | 0.45305 | 0.600835676 | 0.4073   | 0.00504  | hypermethylated |
| cg17592667 | 0.60502 | 0.802361081 | 0.407269 | 0.004691 | hypermethylated |
| cg24925945 | 0.63261 | 0.838914054 | 0.407207 | 0.000204 | hypermethylated |
| cg07139350 | 0.62839 | 0.83331027  | 0.407194 | 0.001603 | hypermethylated |
| cg21390082 | 0.51093 | 0.677530811 | 0.407161 | 0.00134  | hypermethylated |
| cg21970789 | 0.36462 | 0.483384324 | 0.406777 | 6.62E-05 | hypermethylated |
| cg00704780 | 0.48946 | 0.648803784 | 0.406591 | 0.000464 | hypermethylated |
| cg13153708 | 0.54571 | 0.723296757 | 0.406453 | 0.008208 | hypermethylated |
| cg10393227 | 0.29961 | 0.397105946 | 0.406438 | 0.000134 | hypermethylated |
| cg21245492 | 0.66915 | 0.88688     | 0.406409 | 0.000268 | hypermethylated |
| cg00676030 | 0.48575 | 0.643711351 | 0.4062   | 0.008491 | hypermethylated |
| cg12859429 | 0.52276 | 0.692712973 | 0.406109 | 0.000123 | hypermethylated |
| cg09491120 | 0.55306 | 0.732809189 | 0.406002 | 0.00017  | hypermethylated |
| cg07861790 | 0.48874 | 0.647475676 | 0.405759 | 7.12E-05 | hypermethylated |
| cg04453594 | 0.33053 | 0.437829189 | 0.405587 | 5.79E-05 | hypermethylated |
| cg18171392 | 0.38659 | 0.512076216 | 0.405554 | 9.05E-05 | hypermethylated |
| cg05529123 | 0.52694 | 0.697960541 | 0.405507 | 0.004445 | hypermethylated |
| cg12339328 | 0.63567 | 0.841961622 | 0.405476 | 3.95E-05 | hypermethylated |
| cg26587870 | 0.59124 | 0.783112432 | 0.405476 | 0.000884 | hypermethylated |
| cg00318436 | 0.53627 | 0.710244324 | 0.405356 | 0.000797 | hypermethylated |
| cg19252741 | 0.57469 | 0.761123243 | 0.405346 | 0.006451 | hypermethylated |
| cg18374393 | 0.64525 | 0.854465405 | 0.405164 | 0.000365 | hypermethylated |
| cg04617640 | 0.4623  | 0.612188108 | 0.405146 | 0.004863 | hypermethylated |
| cg02041497 | 0.35897 | 0.475310811 | 0.405008 | 0.010126 | hypermethylated |
| cg03624135 | 0.3508  | 0.46442973  | 0.404812 | 9.72E-05 | hypermethylated |
| cg18543610 | 0.41612 | 0.550805946 | 0.404545 | 0.000148 | hypermethylated |
| cg25886621 | 0.56746 | 0.750928649 | 0.404157 | 0.010642 | hypermethylated |
| cg06072036 | 0.53128 | 0.702856757 | 0.403758 | 0.000256 | hypermethylated |
| cg01942816 | 0.47232 | 0.624746486 | 0.403506 | 0.024491 | hypermethylated |
| cg19884223 | 0.36303 | 0.480139459 | 0.403365 | 0.001262 | hypermethylated |
| cg15073906 | 0.56043 | 0.741144865 | 0.403221 | 0.046225 | hypermethylated |
| cg20100801 | 0.5767  | 0.762567027 | 0.403043 | 0.004691 | hypermethylated |
| cg02478023 | 0.4879  | 0.64498973  | 0.402691 | 0.000119 | hypermethylated |
| cg11076814 | 0.47001 | 0.621208108 | 0.402385 | 0.012134 | hypermethylated |
| cg20704654 | 0.6057  | 0.800497838 | 0.402294 | 0.001031 | hypermethylated |
| cg14925024 | 0.51931 | 0.68630973  | 0.402264 | 0.005606 | hypermethylated |
| cg10857341 | 0.568   | 0.750655676 | 0.40226  | 0.002751 | hypermethylated |
| cg04095339 | 0.40714 | 0.537923243 | 0.401875 | 8.84E-05 | hypermethylated |
| cg01069965 | 0.5674  | 0.749641081 | 0.401834 | 0.00054  | hypermethylated |
| cg01124922 | 0.4302  | 0.568374054 | 0.401833 | 0.003136 | hypermethylated |
| cg24002183 | 0.46241 | 0.610927568 | 0.401829 | 0.014838 | hypermethylated |
| cg17132535 | 0.59488 | 0.785853514 | 0.401662 | 0.000287 | hypermethylated |
| cg09880291 | 0.56081 | 0.740821622 | 0.401614 | 0.009238 | hypermethylated |
| cg01075852 | 0.44386 | 0.586285405 | 0.401498 | 0.008069 | hypermethylated |
| cg16854606 | 0.53782 | 0.710358378 | 0.401424 | 0.000251 | hypermethylated |
| cg11743000 | 0.53085 | 0.70115027  | 0.401419 | 0.001423 | hypermethylated |
| cg08751950 | 0.59843 | 0.790352432 | 0.401314 | 0.001635 | hypermethylated |
| cg21386766 | 0.59455 | 0.785224865 | 0.401308 | 0.000187 | hypermethylated |
| cg04944853 | 0.58386 | 0.771044865 | 0.401192 | 0.005411 | hypermethylated |
| cg20018563 | 0.50062 | 0.661012973 | 0.400963 | 0.00039  | hypermethylated |
| cg05797615 | 0.58014 | 0.765968649 | 0.400884 | 0.000902 | hypermethylated |

|            |         |             |          |          |                 |
|------------|---------|-------------|----------|----------|-----------------|
| cg12985235 | 0.6729  | 0.888359459 | 0.400751 | 8.42E-05 | hypermethylated |
| cg06850159 | 0.52428 | 0.692144865 | 0.400737 | 0.000327 | hypermethylated |
| cg18422423 | 0.69759 | 0.920626486 | 0.400237 | 0.000234 | hypermethylated |
| cg17517480 | 0.63062 | 0.83224     | 0.400229 | 0.001987 | hypermethylated |
| cg02501166 | 0.54983 | 0.725612973 | 0.400215 | 0.009394 | hypermethylated |
| cg17419731 | 0.60197 | 0.794354054 | 0.400091 | 0.000306 | hypermethylated |
| cg12230883 | 0.61589 | 0.812619459 | 0.399907 | 0.004059 | hypermethylated |
| cg08500200 | 0.53073 | 0.700227568 | 0.399846 | 0.004134 | hypermethylated |
| cg15364355 | 0.55018 | 0.725876216 | 0.39982  | 0.00095  | hypermethylated |
| cg06504162 | 0.56509 | 0.745483784 | 0.399696 | 3.49E-05 | hypermethylated |
| cg17494585 | 0.60753 | 0.801267027 | 0.399327 | 0.000756 | hypermethylated |
| cg22885014 | 0.42638 | 0.562317297 | 0.399245 | 0.000358 | hypermethylated |
| cg03345668 | 0.48181 | 0.635386486 | 0.39917  | 6.78E-05 | hypermethylated |
| cg01923020 | 0.56501 | 0.745035135 | 0.399032 | 0.000551 | hypermethylated |
| cg23663318 | 0.58514 | 0.771550811 | 0.398979 | 0.000626 | hypermethylated |
| cg12657297 | 0.47168 | 0.621756757 | 0.398542 | 0.001556 | hypermethylated |
| cg07922933 | 0.49589 | 0.65362973  | 0.398453 | 0.002699 | hypermethylated |
| cg22700015 | 0.60276 | 0.79445027  | 0.398373 | 0.000756 | hypermethylated |
| cg10303978 | 0.62759 | 0.827037838 | 0.398131 | 0.009552 | hypermethylated |
| cg10120807 | 0.69357 | 0.913923243 | 0.398032 | 0.000969 | hypermethylated |
| cg16137772 | 0.61218 | 0.806662703 | 0.39801  | 0.006121 | hypermethylated |
| cg23390118 | 0.52454 | 0.691162162 | 0.397971 | 7.93E-05 | hypermethylated |
| cg13718664 | 0.57547 | 0.758255676 | 0.397944 | 0.003637 | hypermethylated |
| cg09717809 | 0.70078 | 0.923299459 | 0.397837 | 0.001262 | hypermethylated |
| cg00786909 | 0.65132 | 0.858062703 | 0.397717 | 0.004171 | hypermethylated |
| cg00733328 | 0.53715 | 0.707572432 | 0.397553 | 5.58E-05 | hypermethylated |
| cg24729221 | 0.47536 | 0.62616     | 0.397511 | 0.000127 | hypermethylated |
| cg06616014 | 0.61276 | 0.806848108 | 0.396975 | 0.001225 | hypermethylated |
| cg00461236 | 0.5631  | 0.741339459 | 0.396743 | 0.000251 | hypermethylated |
| cg23646375 | 0.55819 | 0.734859459 | 0.396712 | 0.002363 | hypermethylated |
| cg21610839 | 0.57038 | 0.750850811 | 0.396603 | 5.86E-05 | hypermethylated |
| cg26205751 | 0.68985 | 0.908097838 | 0.396565 | 0.001031 | hypermethylated |
| cg18180407 | 0.57333 | 0.754707568 | 0.396552 | 0.007933 | hypermethylated |
| cg07037852 | 0.66182 | 0.871188649 | 0.396546 | 0.002803 | hypermethylated |
| cg17098850 | 0.49136 | 0.646679459 | 0.39627  | 0.000772 | hypermethylated |
| cg02236949 | 0.66285 | 0.872343784 | 0.396214 | 0.003538 | hypermethylated |
| cg13327384 | 0.54863 | 0.721903784 | 0.395973 | 0.004248 | hypermethylated |
| cg02332936 | 0.60389 | 0.794567568 | 0.395884 | 0.010999 | hypermethylated |
| cg08893109 | 0.5851  | 0.769807568 | 0.395815 | 0.021549 | hypermethylated |
| cg11401784 | 0.45029 | 0.592423243 | 0.395774 | 0.002455 | hypermethylated |
| cg22810684 | 0.43592 | 0.573487027 | 0.395697 | 0.004951 | hypermethylated |
| cg00808170 | 0.38784 | 0.510207027 | 0.395621 | 0.000313 | hypermethylated |
| cg07125166 | 0.63258 | 0.83211027  | 0.395527 | 0.001603 | hypermethylated |
| cg08758887 | 0.62816 | 0.826259459 | 0.395463 | 0.000633 | hypermethylated |
| cg18861112 | 0.54817 | 0.720978378 | 0.395333 | 0.021548 | hypermethylated |
| cg03226844 | 0.59676 | 0.784817297 | 0.395206 | 0.002455 | hypermethylated |
| cg24824686 | 0.56095 | 0.737680541 | 0.395124 | 9.27E-05 | hypermethylated |
| cg04772968 | 0.56806 | 0.747028649 | 0.39512  | 0.025045 | hypermethylated |
| cg05037270 | 0.65838 | 0.865362703 | 0.394384 | 0.000306 | hypermethylated |
| cg14757311 | 0.53245 | 0.699792432 | 0.394281 | 0.001968 | hypermethylated |
| cg12405139 | 0.52949 | 0.695867027 | 0.394208 | 0.001857 | hypermethylated |
| cg25157472 | 0.50977 | 0.669838919 | 0.393968 | 4.31E-05 | hypermethylated |
| cg03169170 | 0.62262 | 0.818071351 | 0.393875 | 0.000395 | hypermethylated |
| cg16051228 | 0.37392 | 0.491272973 | 0.393795 | 0.02561  | hypermethylated |
| cg13851904 | 0.4004  | 0.525980541 | 0.393567 | 1.30E-05 | hypermethylated |
| cg04387952 | 0.57198 | 0.751108108 | 0.393056 | 0.000506 | hypermethylated |
| cg16997642 | 0.59183 | 0.777114595 | 0.392945 | 0.006915 | hypermethylated |
| cg26856475 | 0.46177 | 0.606179459 | 0.392571 | 0.000464 | hypermethylated |

|            |         |             |          |          |                 |
|------------|---------|-------------|----------|----------|-----------------|
| cg03472349 | 0.60673 | 0.796321622 | 0.392297 | 0.01348  | hypermethylated |
| cg07157230 | 0.53088 | 0.696688649 | 0.392128 | 0.002502 | hypermethylated |
| cg06868026 | 0.5534  | 0.726068108 | 0.391782 | 0.002363 | hypermethylated |
| cg00822361 | 0.50401 | 0.661249189 | 0.391742 | 0.030537 | hypermethylated |
| cg14658493 | 0.55789 | 0.731807568 | 0.391484 | 0.010381 | hypermethylated |
| cg20392615 | 0.48921 | 0.641627027 | 0.391281 | 0.005807 | hypermethylated |
| cg22966391 | 0.58984 | 0.773538919 | 0.39115  | 7.74E-05 | hypermethylated |
| cg11631547 | 0.60209 | 0.789554595 | 0.39106  | 0.019065 | hypermethylated |
| cg24914884 | 0.59976 | 0.786493514 | 0.39105  | 0.002409 | hypermethylated |
| cg21722795 | 0.48856 | 0.640600541 | 0.390889 | 0.002599 | hypermethylated |
| cg18596689 | 0.57802 | 0.75786     | 0.390812 | 0.001164 | hypermethylated |
| cg23251141 | 0.35885 | 0.470472973 | 0.390731 | 0.001188 | hypermethylated |
| cg15738933 | 0.42251 | 0.553904865 | 0.390653 | 0.000613 | hypermethylated |
| cg05670717 | 0.49464 | 0.648354595 | 0.390404 | 0.001651 | hypermethylated |
| cg27434368 | 0.40236 | 0.527381081 | 0.390359 | 0.000335 | hypermethylated |
| cg14550760 | 0.34506 | 0.45227027  | 0.390338 | 0.002026 | hypermethylated |
| cg04034583 | 0.38557 | 0.505364865 | 0.390333 | 2.10E-05 | hypermethylated |
| cg21625737 | 0.65705 | 0.861174595 | 0.390303 | 0.002066 | hypermethylated |
| cg22564695 | 0.58112 | 0.761532432 | 0.390069 | 0.001096 | hypermethylated |
| cg20673721 | 0.5835  | 0.764574054 | 0.389924 | 0.000155 | hypermethylated |
| cg19628619 | 0.53547 | 0.70161027  | 0.389864 | 0.013481 | hypermethylated |
| cg11028624 | 0.59399 | 0.77824973  | 0.389795 | 0.001188 | hypermethylated |
| cg04566826 | 0.49673 | 0.650817297 | 0.389791 | 0.001875 | hypermethylated |
| cg24004943 | 0.63062 | 0.826228108 | 0.389769 | 0.000234 | hypermethylated |
| cg01025774 | 0.44397 | 0.581674595 | 0.38975  | 0.00102  | hypermethylated |
| cg23524354 | 0.49874 | 0.653360541 | 0.389591 | 0.005316 | hypermethylated |
| cg09268961 | 0.54293 | 0.711128108 | 0.389343 | 0.001786 | hypermethylated |
| cg09173348 | 0.51924 | 0.68008     | 0.389303 | 0.002803 | hypermethylated |
| cg18550381 | 0.59099 | 0.774035135 | 0.389265 | 0.003878 | hypermethylated |
| cg16435923 | 0.44807 | 0.586838378 | 0.389239 | 2.71E-05 | hypermethylated |
| cg05185738 | 0.67855 | 0.888518378 | 0.388946 | 0.00395  | hypermethylated |
| cg09293718 | 0.49714 | 0.650968649 | 0.388936 | 0.006451 | hypermethylated |
| cg05404005 | 0.37723 | 0.493941622 | 0.388896 | 0.00291  | hypermethylated |
| cg27645345 | 0.4286  | 0.56118973  | 0.388857 | 0.000866 | hypermethylated |
| cg25748357 | 0.60266 | 0.789085946 | 0.388838 | 0.000588 | hypermethylated |
| cg16703135 | 0.49401 | 0.646818378 | 0.38882  | 0.000115 | hypermethylated |
| cg16679297 | 0.58422 | 0.764905946 | 0.388771 | 0.00039  | hypermethylated |
| cg03243768 | 0.6787  | 0.888594054 | 0.38875  | 0.00017  | hypermethylated |
| cg21115346 | 0.63788 | 0.835051892 | 0.388581 | 0.003316 | hypermethylated |
| cg18858331 | 0.37194 | 0.48688973  | 0.388525 | 8.63E-05 | hypermethylated |
| cg17040483 | 0.68596 | 0.897924865 | 0.38847  | 0.002189 | hypermethylated |
| cg21860560 | 0.3697  | 0.483916757 | 0.388404 | 6.46E-05 | hypermethylated |
| cg16770832 | 0.57471 | 0.752251351 | 0.388381 | 0.001541 | hypermethylated |
| cg06501366 | 0.42163 | 0.551848108 | 0.388294 | 0.000626 | hypermethylated |
| cg24948406 | 0.60295 | 0.789097297 | 0.388165 | 0.002751 | hypermethylated |
| cg05813673 | 0.54486 | 0.713053514 | 0.388125 | 5.65E-05 | hypermethylated |
| cg11718868 | 0.63197 | 0.826990811 | 0.388015 | 0.001237 | hypermethylated |
| cg05749855 | 0.71129 | 0.930754054 | 0.387962 | 0.000848 | hypermethylated |
| cg26710891 | 0.56286 | 0.736401081 | 0.387716 | 0.019065 | hypermethylated |
| cg20011134 | 0.51446 | 0.672890811 | 0.387314 | 0.001096 | hypermethylated |
| cg09748975 | 0.53965 | 0.705828108 | 0.387293 | 3.15E-05 | hypermethylated |
| cg25821781 | 0.62481 | 0.817194054 | 0.387261 | 0.002502 | hypermethylated |
| cg02247178 | 0.46765 | 0.611566486 | 0.38708  | 0.001912 | hypermethylated |
| cg20585830 | 0.59554 | 0.778794595 | 0.387044 | 0.000495 | hypermethylated |
| cg05083202 | 0.63569 | 0.831103784 | 0.386705 | 0.002066 | hypermethylated |
| cg17623793 | 0.4932  | 0.644770811 | 0.386614 | 0.008348 | hypermethylated |
| cg09830455 | 0.58567 | 0.765638378 | 0.386575 | 0.001875 | hypermethylated |
| cg00573504 | 0.6724  | 0.878824865 | 0.386256 | 0.00071  | hypermethylated |

|            |         |             |          |          |                 |
|------------|---------|-------------|----------|----------|-----------------|
| cg21220462 | 0.57892 | 0.756596757 | 0.386161 | 0.001096 | hypermethylated |
| cg12526197 | 0.58728 | 0.767484324 | 0.386089 | 0.000159 | hypermethylated |
| cg03978579 | 0.39027 | 0.509987027 | 0.385988 | 3.71E-05 | hypermethylated |
| cg07177011 | 0.60206 | 0.786614595 | 0.38575  | 0.000412 | hypermethylated |
| cg06535156 | 0.41488 | 0.542031892 | 0.385684 | 0.000204 | hypermethylated |
| cg02289754 | 0.62017 | 0.810199459 | 0.385613 | 9.95E-05 | hypermethylated |
| cg07052737 | 0.58546 | 0.764745946 | 0.38541  | 9.95E-05 | hypermethylated |
| cg04521333 | 0.37067 | 0.48416     | 0.385349 | 9.19E-06 | hypermethylated |
| cg05453358 | 0.64913 | 0.847662703 | 0.384983 | 0.002341 | hypermethylated |
| cg02569509 | 0.63317 | 0.826674054 | 0.384726 | 0.000104 | hypermethylated |
| cg11693848 | 0.42261 | 0.551698378 | 0.384553 | 0.000123 | hypermethylated |
| cg22033530 | 0.5004  | 0.653095135 | 0.384211 | 0.000575 | hypermethylated |
| cg14833621 | 0.53531 | 0.698590811 | 0.384073 | 0.012234 | hypermethylated |
| cg15215348 | 0.55649 | 0.726142703 | 0.383897 | 0.00032  | hypermethylated |
| cg02345417 | 0.6151  | 0.802597838 | 0.383856 | 0.000805 | hypermethylated |
| cg26393977 | 0.58712 | 0.766070811 | 0.383822 | 0.001074 | hypermethylated |
| cg08307753 | 0.43543 | 0.56804     | 0.383552 | 0.002066 | hypermethylated |
| cg05414442 | 0.39091 | 0.509960541 | 0.383549 | 0.000382 | hypermethylated |
| cg18501001 | 0.60618 | 0.790727027 | 0.383433 | 0.000365 | hypermethylated |
| cg04765483 | 0.43769 | 0.570931892 | 0.383409 | 0.009713 | hypermethylated |
| cg08003887 | 0.56138 | 0.732187027 | 0.383235 | 0.009552 | hypermethylated |
| cg23372544 | 0.40207 | 0.524392973 | 0.383202 | 0.000741 | hypermethylated |
| cg03070262 | 0.4213  | 0.549455676 | 0.383155 | 0.000112 | hypermethylated |
| cg12847240 | 0.39919 | 0.520522703 | 0.382886 | 3.67E-05 | hypermethylated |
| cg14244013 | 0.45865 | 0.597928649 | 0.38258  | 0.001188 | hypermethylated |
| cg14940444 | 0.5937  | 0.773941622 | 0.382491 | 0.027573 | hypermethylated |
| cg15777781 | 0.51473 | 0.670968649 | 0.382429 | 0.009552 | hypermethylated |
| cg10498703 | 0.61929 | 0.807240541 | 0.382383 | 0.002856 | hypermethylated |
| cg08819647 | 0.33492 | 0.436512432 | 0.382206 | 0.000293 | hypermethylated |
| cg07039560 | 0.4529  | 0.590234595 | 0.382096 | 0.001314 | hypermethylated |
| cg23035024 | 0.54538 | 0.71074973  | 0.38208  | 0.011274 | hypermethylated |
| cg20208394 | 0.54163 | 0.705784324 | 0.38192  | 0.004485 | hypermethylated |
| cg01432945 | 0.72193 | 0.940701622 | 0.381878 | 0.006229 | hypermethylated |
| cg12927617 | 0.53881 | 0.702052432 | 0.381802 | 0.010211 | hypermethylated |
| cg26030804 | 0.65395 | 0.852020541 | 0.381708 | 0.004566 | hypermethylated |
| cg05239811 | 0.49272 | 0.641915676 | 0.381616 | 0.003286 | hypermethylated |
| cg25657261 | 0.40281 | 0.524765946 | 0.381575 | 9.82E-06 | hypermethylated |
| cg07914200 | 0.57086 | 0.743675135 | 0.381536 | 0.00032  | hypermethylated |
| cg16907527 | 0.53223 | 0.693318378 | 0.381468 | 0.02324  | hypermethylated |
| cg06720544 | 0.61806 | 0.804906486 | 0.381074 | 0.012948 | hypermethylated |
| cg00282426 | 0.61704 | 0.80354973  | 0.381023 | 0.012333 | hypermethylated |
| cg07049592 | 0.45318 | 0.590122162 | 0.380929 | 0.005131 | hypermethylated |
| cg23201938 | 0.62089 | 0.80838     | 0.380696 | 0.000454 | hypermethylated |
| cg07096883 | 0.66051 | 0.85987027  | 0.380539 | 0.0003   | hypermethylated |
| cg07827420 | 0.43215 | 0.562579459 | 0.380525 | 0.000209 | hypermethylated |
| cg00165994 | 0.49903 | 0.64964     | 0.380514 | 0.003843 | hypermethylated |
| cg17897626 | 0.51857 | 0.67502     | 0.380392 | 0.000182 | hypermethylated |
| cg00581154 | 0.54929 | 0.714913514 | 0.380201 | 0.000454 | hypermethylated |
| cg16318253 | 0.58263 | 0.758302162 | 0.380193 | 0.002502 | hypermethylated |
| cg02030410 | 0.60205 | 0.783323784 | 0.379725 | 0.000209 | hypermethylated |
| cg19223129 | 0.59657 | 0.776164324 | 0.379671 | 0.00504  | hypermethylated |
| cg15685144 | 0.40956 | 0.532823243 | 0.379582 | 0.000166 | hypermethylated |
| cg19748485 | 0.38227 | 0.497182703 | 0.379184 | 0.000174 | hypermethylated |
| cg11858450 | 0.54015 | 0.702507027 | 0.379153 | 0.004776 | hypermethylated |
| cg22953960 | 0.54456 | 0.708164324 | 0.378993 | 8.03E-05 | hypermethylated |
| cg06679270 | 0.58021 | 0.754494595 | 0.378935 | 1.21E-05 | hypermethylated |
| cg15788059 | 0.71307 | 0.927186486 | 0.378816 | 0.001525 | hypermethylated |
| cg08769073 | 0.6634  | 0.862557297 | 0.378741 | 0.001556 | hypermethylated |

|            |         |             |          |          |                 |
|------------|---------|-------------|----------|----------|-----------------|
| cg14908170 | 0.59701 | 0.77615027  | 0.378581 | 0.000342 | hypermethylated |
| cg09823859 | 0.57295 | 0.74484     | 0.378521 | 0.000528 | hypermethylated |
| cg12593515 | 0.48019 | 0.624234595 | 0.378483 | 0.00039  | hypermethylated |
| cg16297171 | 0.52966 | 0.688482703 | 0.378354 | 0.000102 | hypermethylated |
| cg04252204 | 0.60833 | 0.790695676 | 0.378268 | 0.000256 | hypermethylated |
| cg24512644 | 0.5251  | 0.682378378 | 0.37798  | 0.016574 | hypermethylated |
| cg11061946 | 0.56791 | 0.737923784 | 0.37781  | 0.043764 | hypermethylated |
| cg06127801 | 0.55191 | 0.71711027  | 0.377762 | 0.007035 | hypermethylated |
| cg09829869 | 0.50896 | 0.66128973  | 0.37773  | 0.005269 | hypermethylated |
| cg03376871 | 0.49173 | 0.638871351 | 0.377659 | 0.002318 | hypermethylated |
| cg06294376 | 0.61069 | 0.793374054 | 0.377561 | 0.002189 | hypermethylated |
| cg23043937 | 0.52686 | 0.684452432 | 0.377531 | 0.010042 | hypermethylated |
| cg26417985 | 0.62158 | 0.807464324 | 0.377458 | 0.000607 | hypermethylated |
| cg10162251 | 0.66601 | 0.865157297 | 0.377419 | 0.002856 | hypermethylated |
| cg27490391 | 0.5197  | 0.675014595 | 0.37724  | 0.001481 | hypermethylated |
| cg27664496 | 0.45446 | 0.590171892 | 0.376982 | 0.000229 | hypermethylated |
| cg04220881 | 0.66364 | 0.861748649 | 0.376866 | 0.000495 | hypermethylated |
| cg02879159 | 0.50681 | 0.658054595 | 0.376762 | 0.00054  | hypermethylated |
| cg19797304 | 0.69495 | 0.902313514 | 0.37672  | 0.001262 | hypermethylated |
| cg09074625 | 0.40686 | 0.52824973  | 0.376688 | 0.000129 | hypermethylated |
| cg04237666 | 0.53236 | 0.691164324 | 0.376627 | 0.019661 | hypermethylated |
| cg07815836 | 0.4018  | 0.521652432 | 0.376611 | 0.001511 | hypermethylated |
| cg04494197 | 0.63213 | 0.820655676 | 0.376556 | 0.000123 | hypermethylated |
| cg07325001 | 0.41174 | 0.534527568 | 0.376531 | 0.014032 | hypermethylated |
| cg05260031 | 0.68901 | 0.894399459 | 0.376394 | 0.00102  | hypermethylated |
| cg12159995 | 0.61209 | 0.794456216 | 0.376224 | 0.001074 | hypermethylated |
| cg14055887 | 0.46906 | 0.608712973 | 0.37599  | 0.001288 | hypermethylated |
| cg11005628 | 0.41499 | 0.538518378 | 0.375919 | 0.000563 | hypermethylated |
| cg19542707 | 0.43262 | 0.561321081 | 0.375726 | 4.53E-05 | hypermethylated |
| cg13523818 | 0.3841  | 0.498361622 | 0.375711 | 5.65E-05 | hypermethylated |
| cg03786842 | 0.60894 | 0.790050811 | 0.375645 | 0.001481 | hypermethylated |
| cg15874877 | 0.47142 | 0.611604324 | 0.375586 | 0.000327 | hypermethylated |
| cg10897223 | 0.47132 | 0.611456757 | 0.375544 | 0.000696 | hypermethylated |
| cg20421482 | 0.55755 | 0.723124865 | 0.375144 | 0.007732 | hypermethylated |
| cg20449726 | 0.47482 | 0.61582     | 0.375128 | 0.000805 | hypermethylated |
| cg03199745 | 0.51259 | 0.664789189 | 0.375092 | 5.14E-06 | hypermethylated |
| cg17311022 | 0.4893  | 0.634572432 | 0.375066 | 0.002253 | hypermethylated |
| cg15159588 | 0.59021 | 0.765427568 | 0.375037 | 0.003739 | hypermethylated |
| cg04522596 | 0.58522 | 0.758841622 | 0.37482  | 0.002026 | hypermethylated |
| cg16508028 | 0.57356 | 0.743715676 | 0.374807 | 0.001395 | hypermethylated |
| cg13884295 | 0.58928 | 0.764050811 | 0.374715 | 0.000306 | hypermethylated |
| cg25690589 | 0.50156 | 0.650308108 | 0.374701 | 0.001857 | hypermethylated |
| cg06724693 | 0.46303 | 0.600250811 | 0.37446  | 0.000756 | hypermethylated |
| cg17676129 | 0.36118 | 0.46820973  | 0.374437 | 0.000545 | hypermethylated |
| cg17838516 | 0.48227 | 0.625154595 | 0.374372 | 9.27E-05 | hypermethylated |
| cg07735851 | 0.62726 | 0.813076216 | 0.374327 | 0.003136 | hypermethylated |
| cg13799919 | 0.55639 | 0.721152432 | 0.374208 | 0.00062  | hypermethylated |
| cg22959260 | 0.65467 | 0.848496757 | 0.374141 | 0.000912 | hypermethylated |
| cg21853871 | 0.54948 | 0.712082703 | 0.373978 | 0.008348 | hypermethylated |
| cg00748072 | 0.55437 | 0.718389189 | 0.373916 | 0.000155 | hypermethylated |
| cg07806674 | 0.60408 | 0.782751892 | 0.373815 | 0.001409 | hypermethylated |
| cg16517298 | 0.57882 | 0.749987568 | 0.373752 | 0.000189 | hypermethylated |
| cg26529864 | 0.70812 | 0.91748     | 0.373683 | 0.000534 | hypermethylated |
| cg25492363 | 0.72686 | 0.941707568 | 0.373602 | 0.001586 | hypermethylated |
| cg09932747 | 0.65754 | 0.851871892 | 0.373558 | 0.00101  | hypermethylated |
| cg03510605 | 0.44647 | 0.578418378 | 0.37355  | 0.000306 | hypermethylated |
| cg24543937 | 0.41138 | 0.532928108 | 0.373469 | 0.00099  | hypermethylated |
| cg17775899 | 0.39395 | 0.51034     | 0.373446 | 0.006737 | hypermethylated |



|            |         |             |          |          |                 |
|------------|---------|-------------|----------|----------|-----------------|
| cg11903177 | 0.72891 | 0.944233514 | 0.373403 | 0.004566 | hypermethylated |
| cg07022279 | 0.62262 | 0.806466486 | 0.373263 | 0.000495 | hypermethylated |
| cg24304309 | 0.44432 | 0.575450811 | 0.373094 | 0.00054  | hypermethylated |
| cg27373390 | 0.59564 | 0.771362703 | 0.372969 | 0.039172 | hypermethylated |
| cg17391741 | 0.56405 | 0.730430811 | 0.372925 | 0.00095  | hypermethylated |
| cg06120399 | 0.45604 | 0.590545946 | 0.372889 | 0.00094  | hypermethylated |
| cg04107939 | 0.50099 | 0.648750811 | 0.372883 | 0.039723 | hypermethylated |
| cg25522738 | 0.53025 | 0.686457297 | 0.372497 | 0.000613 | hypermethylated |
| cg18368845 | 0.64431 | 0.834115135 | 0.372492 | 0.00039  | hypermethylated |
| cg05423392 | 0.57904 | 0.749341081 | 0.37196  | 0.003078 | hypermethylated |
| cg01596963 | 0.38774 | 0.501777838 | 0.371959 | 8.03E-05 | hypermethylated |
| cg03379477 | 0.62701 | 0.811408649 | 0.37194  | 0.002026 | hypermethylated |
| cg03467555 | 0.46266 | 0.5987      | 0.371881 | 0.000327 | hypermethylated |
| cg11021940 | 0.35911 | 0.464698378 | 0.371869 | 0.000234 | hypermethylated |
| cg17597901 | 0.41416 | 0.535932432 | 0.371863 | 5.51E-05 | hypermethylated |
| cg09412882 | 0.53391 | 0.690884865 | 0.371849 | 0.004995 | hypermethylated |
| cg03532040 | 0.40928 | 0.529482162 | 0.371494 | 0.001734 | hypermethylated |
| cg17806437 | 0.72453 | 0.937314054 | 0.371487 | 0.001188 | hypermethylated |
| cg04656171 | 0.51872 | 0.671048108 | 0.37146  | 0.0017   | hypermethylated |
| cg03771840 | 0.48932 | 0.632986486 | 0.371396 | 0.000382 | hypermethylated |
| cg20637688 | 0.59563 | 0.770447568 | 0.37128  | 0.0017   | hypermethylated |
| cg12288076 | 0.43697 | 0.565176757 | 0.371168 | 0.000667 | hypermethylated |
| cg00158122 | 0.4109  | 0.53144     | 0.371119 | 1.35E-05 | hypermethylated |
| cg09083359 | 0.6285  | 0.812859459 | 0.371093 | 0.012036 | hypermethylated |
| cg09370594 | 0.46024 | 0.595152973 | 0.370874 | 0.004951 | hypermethylated |
| cg03392571 | 0.49665 | 0.642235135 | 0.370872 | 0.000588 | hypermethylated |
| cg19628603 | 0.51925 | 0.671444865 | 0.37084  | 0.000124 | hypermethylated |
| cg08761909 | 0.54715 | 0.707487568 | 0.370768 | 0.007035 | hypermethylated |
| cg06876872 | 0.67763 | 0.876081081 | 0.370567 | 0.001423 | hypermethylated |
| cg13928102 | 0.59856 | 0.773845405 | 0.37055  | 0.019065 | hypermethylated |
| cg05672616 | 0.59504 | 0.769135676 | 0.370251 | 0.007408 | hypermethylated |
| cg23204113 | 0.52095 | 0.673338919 | 0.370188 | 0.005223 | hypermethylated |
| cg06711560 | 0.60838 | 0.786251892 | 0.370019 | 0.006175 | hypermethylated |
| cg08396193 | 0.59501 | 0.768927027 | 0.369933 | 0.003571 | hypermethylated |
| cg23467079 | 0.55181 | 0.712945405 | 0.36962  | 0.000117 | hypermethylated |
| cg00920572 | 0.46698 | 0.603274054 | 0.369453 | 1.99E-05 | hypermethylated |
| cg24053163 | 0.67983 | 0.878049189 | 0.369128 | 0.013158 | hypermethylated |
| cg24751154 | 0.64654 | 0.834933514 | 0.368922 | 0.001262 | hypermethylated |
| cg02918557 | 0.46956 | 0.606222162 | 0.368537 | 0.002066 | hypermethylated |
| cg26297344 | 0.44722 | 0.577308649 | 0.368358 | 0.00035  | hypermethylated |
| cg11914962 | 0.50719 | 0.654637838 | 0.368171 | 0.00504  | hypermethylated |
| cg13914708 | 0.59504 | 0.767898378 | 0.367929 | 0.003538 | hypermethylated |
| cg01511557 | 0.43493 | 0.561211351 | 0.367761 | 0.000103 | hypermethylated |
| cg11045531 | 0.57372 | 0.74028     | 0.367724 | 0.023592 | hypermethylated |
| cg23071286 | 0.66332 | 0.855845405 | 0.367645 | 0.00071  | hypermethylated |
| cg20737554 | 0.65852 | 0.849317838 | 0.367077 | 0.00099  | hypermethylated |
| cg24033471 | 0.50827 | 0.655498378 | 0.366997 | 0.00054  | hypermethylated |
| cg18313790 | 0.4349  | 0.560847027 | 0.366924 | 2.64E-05 | hypermethylated |
| cg14276286 | 0.62121 | 0.801108649 | 0.366917 | 0.02324  | hypermethylated |
| cg24757553 | 0.47537 | 0.613010811 | 0.366862 | 0.000115 | hypermethylated |
| cg13357416 | 0.6579  | 0.848311892 | 0.366726 | 0.003316 | hypermethylated |
| cg27132535 | 0.45692 | 0.589067568 | 0.366492 | 0.0017   | hypermethylated |
| cg14828404 | 0.60255 | 0.776781081 | 0.366427 | 0.007408 | hypermethylated |
| cg10500503 | 0.69069 | 0.890346486 | 0.366329 | 0.005706 | hypermethylated |
| cg10230442 | 0.61736 | 0.795805405 | 0.366304 | 0.005508 | hypermethylated |
| cg08641514 | 0.64953 | 0.837270811 | 0.366298 | 0.001949 | hypermethylated |
| cg06899044 | 0.4958  | 0.639100541 | 0.366285 | 9.49E-05 | hypermethylated |
| cg01168289 | 0.55947 | 0.720984324 | 0.365907 | 0.006564 | hypermethylated |

|            |         |             |          |          |                 |
|------------|---------|-------------|----------|----------|-----------------|
| cg13476204 | 0.63663 | 0.820322703 | 0.365736 | 0.004608 | hypermethylated |
| cg21745307 | 0.69661 | 0.897574595 | 0.365681 | 0.00291  | hypermethylated |
| cg00499237 | 0.48762 | 0.628226486 | 0.365527 | 0.004365 | hypermethylated |
| cg02700360 | 0.60471 | 0.779050811 | 0.365474 | 0.01073  | hypermethylated |
| cg25747190 | 0.62223 | 0.801440541 | 0.365148 | 0.000822 | hypermethylated |
| cg17352045 | 0.54737 | 0.704806486 | 0.364711 | 0.000148 | hypermethylated |
| cg07370496 | 0.47845 | 0.615998378 | 0.364558 | 0.000198 | hypermethylated |
| cg02835462 | 0.62397 | 0.803316757 | 0.364492 | 0.000361 | hypermethylated |
| cg05956452 | 0.61187 | 0.787723243 | 0.364464 | 0.000653 | hypermethylated |
| cg26674966 | 0.67326 | 0.866735135 | 0.364427 | 0.005807 | hypermethylated |
| cg20239391 | 0.51392 | 0.661541622 | 0.364288 | 0.002574 | hypermethylated |
| cg14327228 | 0.43425 | 0.558846486 | 0.363926 | 0.004365 | hypermethylated |
| cg04816311 | 0.65239 | 0.839563784 | 0.363905 | 0.000117 | hypermethylated |
| cg14888296 | 0.60847 | 0.783030811 | 0.363883 | 0.011841 | hypermethylated |
| cg02681842 | 0.59741 | 0.768795676 | 0.363879 | 0.003078 | hypermethylated |
| cg05783455 | 0.3677  | 0.473163784 | 0.36381  | 8.32E-05 | hypermethylated |
| cg23942526 | 0.72742 | 0.936048649 | 0.363795 | 0.000122 | hypermethylated |
| cg24901662 | 0.59125 | 0.760807027 | 0.363762 | 0.003195 | hypermethylated |
| cg16792230 | 0.65092 | 0.837556757 | 0.363707 | 0.000327 | hypermethylated |
| cg23092040 | 0.43979 | 0.565829189 | 0.363552 | 0.000346 | hypermethylated |
| cg03265074 | 0.41753 | 0.537174595 | 0.363511 | 0.000912 | hypermethylated |
| cg22280820 | 0.37844 | 0.486835135 | 0.363369 | 9.49E-05 | hypermethylated |
| cg07832006 | 0.54043 | 0.695218919 | 0.36336  | 0.003078 | hypermethylated |
| cg09709600 | 0.62099 | 0.798835676 | 0.363329 | 3.23E-05 | hypermethylated |
| cg00281664 | 0.57991 | 0.745955135 | 0.36326  | 0.002599 | hypermethylated |
| cg21834684 | 0.6234  | 0.801803784 | 0.363091 | 0.001031 | hypermethylated |
| cg27571196 | 0.43042 | 0.553555135 | 0.362982 | 3.85E-05 | hypermethylated |
| cg02793099 | 0.47319 | 0.608556757 | 0.362972 | 6.84E-06 | hypermethylated |
| cg00982535 | 0.70695 | 0.909161081 | 0.362928 | 0.001803 | hypermethylated |
| cg06306260 | 0.63384 | 0.815087027 | 0.362835 | 0.009552 | hypermethylated |
| cg18149207 | 0.51743 | 0.665006486 | 0.362005 | 0.004287 | hypermethylated |
| cg06207120 | 0.52476 | 0.674364865 | 0.361872 | 0.000287 | hypermethylated |
| cg25962358 | 0.48535 | 0.623557838 | 0.361498 | 8.84E-05 | hypermethylated |
| cg17480641 | 0.52884 | 0.679402162 | 0.361435 | 0.00291  | hypermethylated |
| cg26218977 | 0.37736 | 0.484767568 | 0.361352 | 4.70E-05 | hypermethylated |
| cg14717656 | 0.70207 | 0.901834595 | 0.361248 | 0.004325 | hypermethylated |
| cg01285862 | 0.65178 | 0.837028649 | 0.360892 | 0.008001 | hypermethylated |
| cg27287438 | 0.70999 | 0.911756757 | 0.36085  | 0.000109 | hypermethylated |
| cg02126424 | 0.62704 | 0.805185946 | 0.360765 | 0.002725 | hypermethylated |
| cg09204108 | 0.56428 | 0.724582703 | 0.360739 | 0.001052 | hypermethylated |
| cg01983105 | 0.62736 | 0.805555135 | 0.36069  | 0.016835 | hypermethylated |
| cg17816173 | 0.59727 | 0.766912973 | 0.36068  | 0.003347 | hypermethylated |
| cg07996393 | 0.65487 | 0.840789189 | 0.360536 | 0.002502 | hypermethylated |
| cg15805451 | 0.59636 | 0.765667027 | 0.360534 | 0.001041 | hypermethylated |
| cg04105760 | 0.36075 | 0.463138378 | 0.360444 | 3.85E-05 | hypermethylated |
| cg22205276 | 0.58365 | 0.749228649 | 0.360303 | 0.016574 | hypermethylated |
| cg06943925 | 0.53644 | 0.688494054 | 0.360027 | 0.042575 | hypermethylated |
| cg01080927 | 0.68528 | 0.879431351 | 0.359877 | 0.003316 | hypermethylated |
| cg07714276 | 0.4088  | 0.524612432 | 0.359857 | 0.000445 | hypermethylated |
| cg24835238 | 0.53014 | 0.680292432 | 0.359782 | 0.01737  | hypermethylated |
| cg12010198 | 0.4595  | 0.589643243 | 0.359777 | 7.74E-05 | hypermethylated |
| cg23411518 | 0.42949 | 0.5509      | 0.359166 | 0.007799 | hypermethylated |
| cg01038597 | 0.57125 | 0.732712432 | 0.359125 | 0.00151  | hypermethylated |
| cg05985317 | 0.42042 | 0.539246486 | 0.359114 | 0.000152 | hypermethylated |
| cg21222350 | 0.427   | 0.547664324 | 0.359056 | 0.026576 | hypermethylated |
| cg17382918 | 0.52075 | 0.667870811 | 0.358978 | 0.000172 | hypermethylated |
| cg07042546 | 0.52089 | 0.667987027 | 0.358841 | 0.010381 | hypermethylated |
| cg23571839 | 0.69755 | 0.894523784 | 0.358823 | 0.004862 | hypermethylated |

|            |         |             |          |          |                 |
|------------|---------|-------------|----------|----------|-----------------|
| cg07007754 | 0.63566 | 0.815141622 | 0.358795 | 0.004287 | hypermethylated |
| cg16976499 | 0.60505 | 0.775794054 | 0.358619 | 0.000667 | hypermethylated |
| cg04011497 | 0.6337  | 0.812506486 | 0.358579 | 0.002829 | hypermethylated |
| cg25362652 | 0.46725 | 0.599071351 | 0.358533 | 0.000232 | hypermethylated |
| cg25354617 | 0.65459 | 0.839235135 | 0.358484 | 0.002432 | hypermethylated |
| cg17433998 | 0.62085 | 0.795959459 | 0.35845  | 0.006451 | hypermethylated |
| cg24695890 | 0.43092 | 0.552323243 | 0.358093 | 0.000174 | hypermethylated |
| cg04134748 | 0.68232 | 0.874392973 | 0.357833 | 0.000741 | hypermethylated |
| cg25635000 | 0.64049 | 0.820784324 | 0.357827 | 0.004608 | hypermethylated |
| cg02520281 | 0.47291 | 0.605997838 | 0.357747 | 0.002274 | hypermethylated |
| cg09947844 | 0.6345  | 0.812989189 | 0.357616 | 0.003078 | hypermethylated |
| cg03112869 | 0.69473 | 0.889880541 | 0.357159 | 0.003843 | hypermethylated |
| cg15108047 | 0.6317  | 0.809116216 | 0.357107 | 0.000374 | hypermethylated |
| cg27038101 | 0.53006 | 0.678912973 | 0.357071 | 0.002126 | hypermethylated |
| cg16056219 | 0.52501 | 0.672378378 | 0.356928 | 0.005606 | hypermethylated |
| cg12111137 | 0.54067 | 0.692434054 | 0.356928 | 0.002856 | hypermethylated |
| cg18760534 | 0.65402 | 0.837577297 | 0.356888 | 0.002318 | hypermethylated |
| cg20841748 | 0.47396 | 0.606941622 | 0.356792 | 0.000268 | hypermethylated |
| cg20647257 | 0.48694 | 0.623457297 | 0.356547 | 0.001423 | hypermethylated |
| cg16989443 | 0.68035 | 0.871023243 | 0.356434 | 0.001651 | hypermethylated |
| cg09554406 | 0.63548 | 0.813561081 | 0.356404 | 3.57E-05 | hypermethylated |
| cg06233593 | 0.57168 | 0.73184973  | 0.35634  | 0.019361 | hypermethylated |
| cg26657675 | 0.46433 | 0.594397297 | 0.356277 | 0.001875 | hypermethylated |
| cg25577090 | 0.59934 | 0.767188649 | 0.356207 | 0.00048  | hypermethylated |
| cg24102242 | 0.62056 | 0.794286486 | 0.356089 | 0.000159 | hypermethylated |
| cg00521703 | 0.41025 | 0.525091351 | 0.356065 | 7.47E-05 | hypermethylated |
| cg01541600 | 0.50543 | 0.646891892 | 0.356013 | 0.000528 | hypermethylated |
| cg25817701 | 0.6058  | 0.775342162 | 0.355992 | 0.002649 | hypermethylated |
| cg01281231 | 0.58324 | 0.746396757 | 0.355853 | 0.002455 | hypermethylated |
| cg21522988 | 0.60544 | 0.774718378 | 0.355688 | 0.001437 | hypermethylated |
| cg09938408 | 0.57198 | 0.731891892 | 0.355666 | 0.003843 | hypermethylated |
| cg14823825 | 0.63266 | 0.809494595 | 0.355591 | 0.001734 | hypermethylated |
| cg06358218 | 0.5901  | 0.754956216 | 0.355434 | 0.005316 | hypermethylated |
| cg07319253 | 0.68291 | 0.873529189 | 0.35516  | 0.003505 | hypermethylated |
| cg04413148 | 0.61735 | 0.78962973  | 0.355088 | 0.007536 | hypermethylated |
| cg00152948 | 0.65389 | 0.836217297 | 0.35483  | 0.000893 | hypermethylated |
| cg24953703 | 0.55835 | 0.714015676 | 0.354786 | 0.006122 | hypermethylated |
| cg00557959 | 0.66672 | 0.852527568 | 0.354665 | 0.000653 | hypermethylated |
| cg00718444 | 0.67223 | 0.859417297 | 0.354404 | 0.000884 | hypermethylated |
| cg20011248 | 0.51222 | 0.65484     | 0.354379 | 5.06E-05 | hypermethylated |
| cg03442254 | 0.59073 | 0.755205405 | 0.35437  | 0.001041 | hypermethylated |
| cg19256474 | 0.50829 | 0.649768649 | 0.354274 | 0.000293 | hypermethylated |
| cg17509561 | 0.69793 | 0.892098378 | 0.35412  | 0.000163 | hypermethylated |
| cg04183158 | 0.63615 | 0.813026486 | 0.353935 | 0.025992 | hypermethylated |
| cg17980283 | 0.36923 | 0.47186973  | 0.353869 | 0.000115 | hypermethylated |
| cg00992417 | 0.66262 | 0.846812973 | 0.353862 | 0.00591  | hypermethylated |
| cg00431894 | 0.60534 | 0.773568108 | 0.353783 | 0.018485 | hypermethylated |
| cg16110314 | 0.70513 | 0.901017838 | 0.353666 | 0.002363 | hypermethylated |
| cg04228709 | 0.58609 | 0.748824865 | 0.353506 | 8.63E-05 | hypermethylated |
| cg18074184 | 0.47736 | 0.609887568 | 0.353466 | 0.000122 | hypermethylated |
| cg01281038 | 0.63171 | 0.807064324 | 0.353421 | 0.002318 | hypermethylated |
| cg02625536 | 0.48756 | 0.622873514 | 0.353359 | 0.002274 | hypermethylated |
| cg06015733 | 0.47224 | 0.603270811 | 0.353286 | 0.012036 | hypermethylated |
| cg03275201 | 0.52463 | 0.670048108 | 0.352964 | 0.00097  | hypermethylated |
| cg11898646 | 0.49957 | 0.638034054 | 0.352947 | 0.00513  | hypermethylated |
| cg00955307 | 0.52262 | 0.667452973 | 0.352904 | 1.23E-05 | hypermethylated |
| cg24937136 | 0.55619 | 0.710299459 | 0.35285  | 0.000464 | hypermethylated |
| cg15313740 | 0.59003 | 0.753423243 | 0.352672 | 0.000495 | hypermethylated |

|            |         |             |          |          |                 |
|------------|---------|-------------|----------|----------|-----------------|
| cg01328444 | 0.59807 | 0.763607568 | 0.352517 | 0.014145 | hypermethylated |
| cg00853742 | 0.55562 | 0.709362162 | 0.352424 | 0.012535 | hypermethylated |
| cg09053247 | 0.55201 | 0.704725946 | 0.352368 | 0.001096 | hypermethylated |
| cg26978776 | 0.67628 | 0.863263243 | 0.35218  | 0.006679 | hypermethylated |
| cg13809270 | 0.47454 | 0.605668649 | 0.351999 | 0.003773 | hypermethylated |
| cg18225577 | 0.69062 | 0.881361081 | 0.351841 | 0.000445 | hypermethylated |
| cg03988107 | 0.52607 | 0.671363243 | 0.351839 | 0.00134  | hypermethylated |
| cg22241045 | 0.54474 | 0.695141081 | 0.351738 | 0.010211 | hypermethylated |
| cg02350039 | 0.65441 | 0.834852432 | 0.351326 | 0.027371 | hypermethylated |
| cg16234490 | 0.52878 | 0.674540541 | 0.351238 | 0.00193  | hypermethylated |
| cg00199065 | 0.65339 | 0.833405405 | 0.351074 | 0.001667 | hypermethylated |
| cg01033419 | 0.63558 | 0.810420541 | 0.350597 | 0.000408 | hypermethylated |
| cg13458253 | 0.50396 | 0.642574595 | 0.350555 | 0.002147 | hypermethylated |
| cg08679971 | 0.54087 | 0.689503784 | 0.350277 | 0.002478 | hypermethylated |
| cg02765177 | 0.66543 | 0.848197297 | 0.350113 | 0.00221  | hypermethylated |
| cg10548254 | 0.52695 | 0.671641622 | 0.350026 | 0.002502 | hypermethylated |
| cg13606990 | 0.48737 | 0.621171351 | 0.349974 | 0.003378 | hypermethylated |
| cg17954142 | 0.62837 | 0.800638378 | 0.349536 | 0.000293 | hypermethylated |
| cg18524262 | 0.66627 | 0.848875135 | 0.349445 | 0.001153 | hypermethylated |
| cg04507915 | 0.65131 | 0.8298      | 0.349419 | 0.000195 | hypermethylated |
| cg14532376 | 0.61802 | 0.787230811 | 0.349133 | 0.000195 | hypermethylated |
| cg05333146 | 0.52065 | 0.663125946 | 0.348969 | 0.00039  | hypermethylated |
| cg25528121 | 0.65015 | 0.828051892 | 0.348949 | 0.001237 | hypermethylated |
| cg09501959 | 0.53944 | 0.686986486 | 0.348819 | 0.00095  | hypermethylated |
| cg07714085 | 0.50723 | 0.645884865 | 0.348637 | 0.000251 | hypermethylated |
| cg13609939 | 0.59982 | 0.763775676 | 0.348619 | 0.009394 | hypermethylated |
| cg17863312 | 0.56897 | 0.724404324 | 0.348443 | 0.002318 | hypermethylated |
| cg12188410 | 0.57792 | 0.735723243 | 0.348293 | 0.036003 | hypermethylated |
| cg16445423 | 0.53967 | 0.686972973 | 0.348176 | 0.003986 | hypermethylated |
| cg12781568 | 0.59171 | 0.753174054 | 0.348093 | 0.000129 | hypermethylated |
| cg08094235 | 0.69544 | 0.885191892 | 0.348064 | 0.000104 | hypermethylated |
| cg23586440 | 0.64755 | 0.82414973  | 0.347915 | 0.03076  | hypermethylated |
| cg24079790 | 0.67504 | 0.859104865 | 0.347861 | 0.003136 | hypermethylated |
| cg11659652 | 0.65261 | 0.830531351 | 0.347814 | 4.53E-05 | hypermethylated |
| cg03291548 | 0.60227 | 0.766325946 | 0.347548 | 4.47E-05 | hypermethylated |
| cg22908000 | 0.66471 | 0.845684865 | 0.347395 | 0.004863 | hypermethylated |
| cg21946698 | 0.5826  | 0.741175135 | 0.347309 | 0.009795 | hypermethylated |
| cg07589235 | 0.56034 | 0.712825405 | 0.347246 | 0.004691 | hypermethylated |
| cg23348372 | 0.67705 | 0.861272432 | 0.347207 | 0.00101  | hypermethylated |
| cg07026560 | 0.60511 | 0.769727027 | 0.347149 | 0.002455 | hypermethylated |
| cg01722932 | 0.40446 | 0.514454595 | 0.347047 | 1.01E-05 | hypermethylated |
| cg09941143 | 0.57946 | 0.737041081 | 0.347036 | 0.010999 | hypermethylated |
| cg11888359 | 0.72316 | 0.919696757 | 0.346843 | 0.001367 | hypermethylated |
| cg14611258 | 0.55804 | 0.709681081 | 0.346802 | 0.034997 | hypermethylated |
| cg01845451 | 0.5847  | 0.743548649 | 0.346731 | 0.00039  | hypermethylated |
| cg01872947 | 0.55949 | 0.711458919 | 0.346668 | 0.000182 | hypermethylated |
| cg23245711 | 0.56401 | 0.717146486 | 0.346547 | 0.003107 | hypermethylated |
| cg20680163 | 0.59296 | 0.753938919 | 0.346513 | 0.001395 | hypermethylated |
| cg08149459 | 0.65055 | 0.827124324 | 0.346444 | 0.00024  | hypermethylated |
| cg15445725 | 0.57873 | 0.735776216 | 0.346377 | 0.007408 | hypermethylated |
| cg15122993 | 0.61536 | 0.782318919 | 0.346326 | 6.62E-05 | hypermethylated |
| cg20209499 | 0.64015 | 0.813795135 | 0.346256 | 0.000875 | hypermethylated |
| cg04889069 | 0.46509 | 0.591245946 | 0.346248 | 0.000445 | hypermethylated |
| cg23371436 | 0.50494 | 0.641889189 | 0.346212 | 0.000588 | hypermethylated |
| cg19961522 | 0.57471 | 0.73056973  | 0.346188 | 0.008069 | hypermethylated |
| cg27593537 | 0.5047  | 0.641561622 | 0.346162 | 0.000613 | hypermethylated |
| cg18449426 | 0.62636 | 0.796082703 | 0.345926 | 0.006679 | hypermethylated |
| cg23077820 | 0.55329 | 0.703197297 | 0.345894 | 4.26E-05 | hypermethylated |

|            |         |             |          |          |                 |
|------------|---------|-------------|----------|----------|-----------------|
| cg11599526 | 0.5946  | 0.755674595 | 0.345846 | 0.000214 | hypermethylated |
| cg02074714 | 0.38496 | 0.489219459 | 0.345773 | 0.003773 | hypermethylated |
| cg10577819 | 0.52139 | 0.662583243 | 0.345739 | 0.008069 | hypermethylated |
| cg02161292 | 0.54956 | 0.698358919 | 0.345692 | 0.000157 | hypermethylated |
| cg18634516 | 0.58133 | 0.738722703 | 0.345676 | 0.007799 | hypermethylated |
| cg20296493 | 0.46965 | 0.596721081 | 0.345471 | 0.000204 | hypermethylated |
| cg24687655 | 0.6128  | 0.778574595 | 0.345419 | 0.000123 | hypermethylated |
| cg19815574 | 0.42773 | 0.543395676 | 0.345303 | 9.05E-05 | hypermethylated |
| cg09169516 | 0.65532 | 0.832139459 | 0.344626 | 0.01737  | hypermethylated |
| cg14317414 | 0.56577 | 0.718374595 | 0.344521 | 0.003843 | hypermethylated |
| cg26980034 | 0.55088 | 0.699441081 | 0.344464 | 0.00029  | hypermethylated |
| cg16365445 | 0.54495 | 0.691865946 | 0.344369 | 0.010819 | hypermethylated |
| cg20834681 | 0.44834 | 0.569164865 | 0.344253 | 0.000822 | hypermethylated |
| cg12211161 | 0.55083 | 0.699255676 | 0.344213 | 0.004485 | hypermethylated |
| cg01624637 | 0.54913 | 0.697085946 | 0.344189 | 0.008069 | hypermethylated |
| cg06431953 | 0.67274 | 0.85392     | 0.344052 | 0.010819 | hypermethylated |
| cg25722041 | 0.58264 | 0.73936973  | 0.343691 | 0.00012  | hypermethylated |
| cg18105665 | 0.68402 | 0.867998919 | 0.343655 | 0.011554 | hypermethylated |
| cg26920808 | 0.64791 | 0.822149189 | 0.343607 | 0.002126 | hypermethylated |
| cg03894103 | 0.63667 | 0.8078      | 0.343452 | 0.005269 | hypermethylated |
| cg27532754 | 0.62072 | 0.787476757 | 0.343295 | 0.007472 | hypermethylated |
| cg15001843 | 0.64462 | 0.817783243 | 0.34327  | 0.000166 | hypermethylated |
| cg13175830 | 0.62532 | 0.793154054 | 0.343006 | 0.00064  | hypermethylated |
| cg21488279 | 0.50105 | 0.635518919 | 0.34298  | 1.92E-05 | hypermethylated |
| cg04658707 | 0.60072 | 0.761932432 | 0.34297  | 0.00421  | hypermethylated |
| cg06895767 | 0.47445 | 0.601757838 | 0.342927 | 1.52E-05 | hypermethylated |
| cg18591945 | 0.46856 | 0.594235135 | 0.3428   | 0.00504  | hypermethylated |
| cg25818697 | 0.48115 | 0.610188649 | 0.342769 | 0.00031  | hypermethylated |
| cg10722444 | 0.51246 | 0.649884865 | 0.342745 | 0.001466 | hypermethylated |
| cg19296354 | 0.46099 | 0.584571351 | 0.342644 | 0.000528 | hypermethylated |
| cg05081497 | 0.39364 | 0.499126486 | 0.342529 | 3.23E-05 | hypermethylated |
| cg21542643 | 0.52665 | 0.667758378 | 0.342482 | 0.004365 | hypermethylated |
| cg07804728 | 0.64071 | 0.812314595 | 0.342367 | 0.016315 | hypermethylated |
| cg05349077 | 0.73458 | 0.931202162 | 0.342175 | 0.001395 | hypermethylated |
| cg24248680 | 0.6759  | 0.856636216 | 0.341873 | 0.005222 | hypermethylated |
| cg18566727 | 0.38856 | 0.492426486 | 0.341771 | 0.00029  | hypermethylated |
| cg26584983 | 0.54811 | 0.694581622 | 0.341679 | 0.010042 | hypermethylated |
| cg05771459 | 0.58181 | 0.737282162 | 0.341669 | 0.000474 | hypermethylated |
| cg03680996 | 0.57781 | 0.732185405 | 0.341614 | 0.01109  | hypermethylated |
| cg25198599 | 0.55797 | 0.706972973 | 0.341468 | 0.002318 | hypermethylated |
| cg22161784 | 0.56325 | 0.713631351 | 0.341404 | 0.007472 | hypermethylated |
| cg04207632 | 0.67733 | 0.858111892 | 0.341307 | 0.008783 | hypermethylated |
| cg24494114 | 0.5124  | 0.649111351 | 0.341196 | 0.007158 | hypermethylated |
| cg06740372 | 0.62074 | 0.786288649 | 0.34107  | 0.002274 | hypermethylated |
| cg03693099 | 0.56397 | 0.714332973 | 0.340978 | 0.01737  | hypermethylated |
| cg05410198 | 0.42473 | 0.537935135 | 0.340886 | 0.000426 | hypermethylated |
| cg00950706 | 0.64713 | 0.819588108 | 0.340843 | 0.00421  | hypermethylated |
| cg02135859 | 0.39865 | 0.504881622 | 0.340822 | 0.003506 | hypermethylated |
| cg05757474 | 0.73434 | 0.92998     | 0.340752 | 0.001875 | hypermethylated |
| cg00747890 | 0.73653 | 0.932725946 | 0.340709 | 0.002086 | hypermethylated |
| cg24899806 | 0.54672 | 0.69234973  | 0.340699 | 0.000756 | hypermethylated |
| cg00810939 | 0.67395 | 0.85345027  | 0.340666 | 0.001381 | hypermethylated |
| cg27172557 | 0.53749 | 0.680582162 | 0.340531 | 0.000454 | hypermethylated |
| cg15538767 | 0.46673 | 0.59094973  | 0.340447 | 1.42E-05 | hypermethylated |
| cg10164264 | 0.70253 | 0.889503784 | 0.340441 | 0.000588 | hypermethylated |
| cg18792031 | 0.63563 | 0.804798378 | 0.34044  | 0.002147 | hypermethylated |
| cg18091615 | 0.61708 | 0.781278378 | 0.340379 | 0.011649 | hypermethylated |
| cg16586406 | 0.48315 | 0.611671892 | 0.340287 | 0.000115 | hypermethylated |

|            |         |             |          |          |                 |
|------------|---------|-------------|----------|----------|-----------------|
| cg19505194 | 0.55952 | 0.70832973  | 0.340231 | 0.005656 | hypermethylated |
| cg12475142 | 0.63441 | 0.803037838 | 0.340052 | 0.01392  | hypermethylated |
| cg12180613 | 0.62223 | 0.787605946 | 0.340026 | 1.84E-05 | hypermethylated |
| cg05062854 | 0.43219 | 0.547008649 | 0.339898 | 0.000789 | hypermethylated |
| cg16540134 | 0.65167 | 0.824697838 | 0.339724 | 0.0017   | hypermethylated |
| cg18493030 | 0.60162 | 0.761325946 | 0.339662 | 0.005411 | hypermethylated |
| cg11823159 | 0.60486 | 0.765360541 | 0.339538 | 0.006796 | hypermethylated |
| cg14834653 | 0.67442 | 0.853343784 | 0.33948  | 0.000185 | hypermethylated |
| cg12494683 | 0.63515 | 0.803580541 | 0.339345 | 0.009713 | hypermethylated |
| cg15911153 | 0.50524 | 0.639112973 | 0.339102 | 0.00275  | hypermethylated |
| cg15089111 | 0.51595 | 0.65266     | 0.3391   | 0.000382 | hypermethylated |
| cg01790438 | 0.55866 | 0.706622162 | 0.338968 | 0.001667 | hypermethylated |
| cg04355077 | 0.70107 | 0.886704865 | 0.338895 | 0.003441 | hypermethylated |
| cg26947831 | 0.46267 | 0.585115135 | 0.338737 | 7.03E-06 | hypermethylated |
| cg17468616 | 0.63202 | 0.799241622 | 0.338662 | 0.000893 | hypermethylated |
| cg22142922 | 0.50467 | 0.638170811 | 0.338602 | 0.000253 | hypermethylated |
| cg01250563 | 0.51411 | 0.650055135 | 0.338485 | 0.00013  | hypermethylated |
| cg14215786 | 0.67762 | 0.856768108 | 0.338428 | 0.000193 | hypermethylated |
| cg13461482 | 0.53229 | 0.672942162 | 0.33827  | 0.003986 | hypermethylated |
| cg04205655 | 0.56847 | 0.718583784 | 0.338072 | 0.005911 | hypermethylated |
| cg09762115 | 0.69876 | 0.883272973 | 0.338062 | 0.000875 | hypermethylated |
| cg15231989 | 0.5782  | 0.730851892 | 0.33801  | 0.007799 | hypermethylated |
| cg21880222 | 0.62141 | 0.78543027  | 0.337938 | 0.007035 | hypermethylated |
| cg01804278 | 0.73625 | 0.930554595 | 0.337895 | 0.000245 | hypermethylated |
| cg02384251 | 0.55301 | 0.698948649 | 0.337881 | 0.006679 | hypermethylated |
| cg17927493 | 0.71237 | 0.900324324 | 0.337818 | 0.004525 | hypermethylated |
| cg16574154 | 0.64549 | 0.815793514 | 0.337809 | 0.015439 | hypermethylated |
| cg01400884 | 0.43329 | 0.547607027 | 0.337808 | 3.67E-05 | hypermethylated |
| cg08884611 | 0.45892 | 0.579963784 | 0.33772  | 0.00101  | hypermethylated |
| cg08209711 | 0.64948 | 0.820718919 | 0.337603 | 0.004485 | hypermethylated |
| cg20764033 | 0.58151 | 0.734797297 | 0.337542 | 0.017643 | hypermethylated |
| cg16051656 | 0.62251 | 0.786594054 | 0.337522 | 0.002649 | hypermethylated |
| cg00833479 | 0.55826 | 0.705392432 | 0.337489 | 0.000408 | hypermethylated |
| cg19394047 | 0.62321 | 0.787446486 | 0.337464 | 0.030537 | hypermethylated |
| cg27015161 | 0.70088 | 0.885575676 | 0.337448 | 0.000163 | hypermethylated |
| cg10826733 | 0.53268 | 0.673030811 | 0.337403 | 0.001164 | hypermethylated |
| cg27227797 | 0.49881 | 0.630156216 | 0.337219 | 0.00028  | hypermethylated |
| cg13056222 | 0.51756 | 0.65381027  | 0.337146 | 0.00032  | hypermethylated |
| cg05564412 | 0.53821 | 0.679855676 | 0.337059 | 0.000403 | hypermethylated |
| cg26613361 | 0.50199 | 0.634071351 | 0.336987 | 0.000209 | hypermethylated |
| cg08324703 | 0.62921 | 0.794612432 | 0.33671  | 0.006796 | hypermethylated |
| cg26194092 | 0.62171 | 0.785130811 | 0.336691 | 0.001212 | hypermethylated |
| cg13316720 | 0.58278 | 0.735852432 | 0.336465 | 0.001912 | hypermethylated |
| cg07898582 | 0.63059 | 0.796095676 | 0.33624  | 0.001635 | hypermethylated |
| cg00067600 | 0.56334 | 0.711114595 | 0.336076 | 0.003637 | hypermethylated |
| cg17160666 | 0.63271 | 0.798532973 | 0.335808 | 0.000495 | hypermethylated |
| cg01336878 | 0.65436 | 0.825835135 | 0.335769 | 0.003986 | hypermethylated |
| cg10418237 | 0.45695 | 0.576678378 | 0.335731 | 0.000219 | hypermethylated |
| cg08115732 | 0.66462 | 0.838607027 | 0.335465 | 0.002318 | hypermethylated |
| cg01748082 | 0.42239 | 0.532937297 | 0.33539  | 0.000132 | hypermethylated |
| cg01836567 | 0.43365 | 0.547122162 | 0.335332 | 0.000119 | hypermethylated |
| cg27456185 | 0.66097 | 0.833896216 | 0.335283 | 0.046224 | hypermethylated |
| cg16562776 | 0.51827 | 0.653861081 | 0.33528  | 0.000588 | hypermethylated |
| cg21859594 | 0.63001 | 0.794807568 | 0.335231 | 0.002231 | hypermethylated |
| cg13779795 | 0.40961 | 0.516687027 | 0.33504  | 7.65E-05 | hypermethylated |
| cg27578381 | 0.59452 | 0.749912432 | 0.334997 | 0.001212 | hypermethylated |
| cg20591728 | 0.6729  | 0.848775676 | 0.334991 | 0.003843 | hypermethylated |
| cg08749917 | 0.42609 | 0.537418378 | 0.334887 | 0.000485 | hypermethylated |

|            |         |             |          |          |                 |
|------------|---------|-------------|----------|----------|-----------------|
| cg23056539 | 0.61829 | 0.779793514 | 0.334808 | 0.001423 | hypermethylated |
| cg17482963 | 0.62881 | 0.792947027 | 0.3346   | 0.012637 | hypermethylated |
| cg07576714 | 0.64667 | 0.815460541 | 0.334585 | 0.000831 | hypermethylated |
| cg13167518 | 0.54274 | 0.684356216 | 0.334486 | 0.000142 | hypermethylated |
| cg14678084 | 0.654   | 0.82454     | 0.334299 | 0.01806  | hypermethylated |
| cg20160996 | 0.59053 | 0.74449027  | 0.334243 | 5.51E-05 | hypermethylated |
| cg14856679 | 0.53874 | 0.679155676 | 0.334153 | 0.002599 | hypermethylated |
| cg22191277 | 0.7226  | 0.910869189 | 0.334047 | 0.000219 | hypermethylated |
| cg22008075 | 0.65616 | 0.827004865 | 0.333848 | 0.000545 | hypermethylated |
| cg04266901 | 0.67566 | 0.851445946 | 0.333617 | 0.026186 | hypermethylated |
| cg05365320 | 0.57137 | 0.719871351 | 0.333314 | 0.034014 | hypermethylated |
| cg06507244 | 0.66366 | 0.836081622 | 0.333199 | 0.001052 | hypermethylated |
| cg03841638 | 0.49255 | 0.620512432 | 0.33319  | 0.001452 | hypermethylated |
| cg16669607 | 0.50373 | 0.634534595 | 0.333048 | 0.001041 | hypermethylated |
| cg00870778 | 0.62317 | 0.784891892 | 0.332868 | 0.037035 | hypermethylated |
| cg15273575 | 0.71382 | 0.898916757 | 0.332627 | 0.002599 | hypermethylated |
| cg01217876 | 0.59062 | 0.743766486 | 0.33262  | 0.00099  | hypermethylated |
| cg14780068 | 0.54078 | 0.680998919 | 0.332611 | 0.001262 | hypermethylated |
| cg20309677 | 0.67283 | 0.847243243 | 0.332534 | 0.000274 | hypermethylated |
| cg25486824 | 0.63668 | 0.80170973  | 0.332512 | 0.002363 | hypermethylated |
| cg01856384 | 0.48549 | 0.611284324 | 0.332402 | 0.00028  | hypermethylated |
| cg26410635 | 0.54144 | 0.681675135 | 0.332283 | 0.000875 | hypermethylated |
| cg14758757 | 0.66795 | 0.840928108 | 0.332242 | 0.001118 | hypermethylated |
| cg05679686 | 0.6481  | 0.815864324 | 0.332113 | 0.001074 | hypermethylated |
| cg25306480 | 0.59972 | 0.754899459 | 0.331995 | 9.27E-05 | hypermethylated |
| cg26274166 | 0.63513 | 0.799397297 | 0.331861 | 0.0006   | hypermethylated |
| cg12964697 | 0.55356 | 0.696721622 | 0.331843 | 0.000361 | hypermethylated |
| cg06261595 | 0.62016 | 0.780531351 | 0.331816 | 0.007933 | hypermethylated |
| cg22628240 | 0.62202 | 0.782808108 | 0.331698 | 0.00513  | hypermethylated |
| cg06659380 | 0.67344 | 0.847397297 | 0.331489 | 0.001571 | hypermethylated |
| cg21336373 | 0.48232 | 0.606862703 | 0.33138  | 0.007933 | hypermethylated |
| cg00095859 | 0.51636 | 0.649435135 | 0.330808 | 0.000178 | hypermethylated |
| cg07187971 | 0.67741 | 0.851907027 | 0.330667 | 0.000613 | hypermethylated |
| cg01191566 | 0.67309 | 0.846470811 | 0.330661 | 0.003195 | hypermethylated |
| cg07125412 | 0.45938 | 0.577696216 | 0.330623 | 0.000495 | hypermethylated |
| cg04051335 | 0.61685 | 0.775720541 | 0.330617 | 0.00099  | hypermethylated |
| cg04304509 | 0.52339 | 0.65808     | 0.330377 | 0.008636 | hypermethylated |
| cg01878308 | 0.67812 | 0.852570811 | 0.330279 | 0.043166 | hypermethylated |
| cg16197088 | 0.71743 | 0.901904324 | 0.330136 | 0.001481 | hypermethylated |
| cg08961621 | 0.56377 | 0.708625405 | 0.329916 | 0.000426 | hypermethylated |
| cg27340506 | 0.47291 | 0.594329189 | 0.329697 | 0.00017  | hypermethylated |
| cg00183067 | 0.47744 | 0.599948108 | 0.329518 | 0.00095  | hypermethylated |
| cg27180492 | 0.68794 | 0.864451892 | 0.329503 | 0.02717  | hypermethylated |
| cg22245961 | 0.52224 | 0.656167027 | 0.32935  | 0.013481 | hypermethylated |
| cg26252958 | 0.65546 | 0.823474054 | 0.329215 | 0.0182   | hypermethylated |
| cg17375267 | 0.44416 | 0.558011351 | 0.329215 | 0.000814 | hypermethylated |
| cg21664351 | 0.65385 | 0.821427568 | 0.329174 | 0.024308 | hypermethylated |
| cg00324366 | 0.57975 | 0.728314054 | 0.32913  | 0.029023 | hypermethylated |
| cg14462779 | 0.43201 | 0.542688108 | 0.329059 | 2.24E-05 | hypermethylated |
| cg16457842 | 0.60154 | 0.755587568 | 0.328938 | 7.56E-05 | hypermethylated |
| cg21096141 | 0.66607 | 0.836640541 | 0.328934 | 0.002599 | hypermethylated |
| cg04999691 | 0.50326 | 0.632082703 | 0.328809 | 0.000875 | hypermethylated |
| cg20569034 | 0.56449 | 0.708942162 | 0.32872  | 0.000408 | hypermethylated |
| cg21584979 | 0.68027 | 0.854262703 | 0.328572 | 0.000839 | hypermethylated |
| cg17133446 | 0.64615 | 0.811403243 | 0.32855  | 0.022044 | hypermethylated |
| cg06757405 | 0.39224 | 0.492532973 | 0.328484 | 9.96E-06 | hypermethylated |
| cg16459735 | 0.66618 | 0.836437297 | 0.328345 | 0.012036 | hypermethylated |
| cg16851046 | 0.58617 | 0.735936757 | 0.328263 | 0.009394 | hypermethylated |

|            |         |             |          |          |                 |
|------------|---------|-------------|----------|----------|-----------------|
| cg05506270 | 0.52249 | 0.655936216 | 0.328152 | 0.001949 | hypermethylated |
| cg01880541 | 0.55939 | 0.702201081 | 0.32803  | 0.012637 | hypermethylated |
| cg21945949 | 0.6718  | 0.843302703 | 0.328019 | 0.001893 | hypermethylated |
| cg12636435 | 0.4126  | 0.517791892 | 0.327629 | 0.000417 | hypermethylated |
| cg12307237 | 0.56226 | 0.705526486 | 0.327463 | 0.000789 | hypermethylated |
| cg19769715 | 0.5767  | 0.723637297 | 0.327446 | 0.004776 | hypermethylated |
| cg23237276 | 0.51892 | 0.651027568 | 0.327206 | 0.000123 | hypermethylated |
| cg01733599 | 0.635   | 0.79658973  | 0.32708  | 0.008709 | hypermethylated |
| cg08783253 | 0.4963  | 0.622574054 | 0.327033 | 0.001734 | hypermethylated |
| cg27480241 | 0.72008 | 0.903277838 | 0.327013 | 0.001785 | hypermethylated |
| cg19755314 | 0.5846  | 0.733321622 | 0.326996 | 0.006855 | hypermethylated |
| cg27228433 | 0.47358 | 0.594048108 | 0.326972 | 0.000575 | hypermethylated |
| cg15368455 | 0.53294 | 0.668429189 | 0.326802 | 0.000327 | hypermethylated |
| cg14761227 | 0.56923 | 0.713865946 | 0.326641 | 0.002231 | hypermethylated |
| cg24483767 | 0.57463 | 0.720626486 | 0.326618 | 0.009713 | hypermethylated |
| cg24028260 | 0.60207 | 0.755004324 | 0.326554 | 0.002965 | hypermethylated |
| cg21516162 | 0.6585  | 0.825686486 | 0.326411 | 0.001987 | hypermethylated |
| cg06282952 | 0.47802 | 0.599370811 | 0.326378 | 0.002066 | hypermethylated |
| cg07047280 | 0.6378  | 0.799679459 | 0.326318 | 0.010042 | hypermethylated |
| cg00730820 | 0.4756  | 0.596237297 | 0.326138 | 0.000253 | hypermethylated |
| cg24413339 | 0.47563 | 0.596271892 | 0.326131 | 0.001262 | hypermethylated |
| cg03099728 | 0.50682 | 0.635325405 | 0.326022 | 0.004445 | hypermethylated |
| cg21481937 | 0.60791 | 0.762003784 | 0.32594  | 0.001423 | hypermethylated |
| cg08214455 | 0.52024 | 0.652071351 | 0.325853 | 0.00054  | hypermethylated |
| cg24498500 | 0.70991 | 0.889804324 | 0.325852 | 0.01021  | hypermethylated |
| cg04370634 | 0.59206 | 0.742058378 | 0.325789 | 0.001541 | hypermethylated |
| cg11164639 | 0.58962 | 0.738919459 | 0.325632 | 0.000912 | hypermethylated |
| cg08182501 | 0.60422 | 0.75714     | 0.325486 | 0.000129 | hypermethylated |
| cg15332951 | 0.72281 | 0.905713514 | 0.325438 | 0.003637 | hypermethylated |
| cg17317266 | 0.62954 | 0.788825946 | 0.325409 | 0.003473 | hypermethylated |
| cg15456742 | 0.6832  | 0.856037297 | 0.325366 | 0.030537 | hypermethylated |
| cg04807108 | 0.54559 | 0.683612432 | 0.325361 | 0.000335 | hypermethylated |
| cg26247841 | 0.70598 | 0.884543784 | 0.325306 | 0.000417 | hypermethylated |
| cg03489382 | 0.52417 | 0.65671027  | 0.325222 | 0.000575 | hypermethylated |
| cg02149965 | 0.4989  | 0.625010811 | 0.32513  | 0.019361 | hypermethylated |
| cg18119735 | 0.48482 | 0.607354595 | 0.32509  | 0.00013  | hypermethylated |
| cg00966405 | 0.63637 | 0.797174054 | 0.325029 | 0.000191 | hypermethylated |
| cg05269013 | 0.54102 | 0.677697297 | 0.324959 | 0.000374 | hypermethylated |
| cg04834608 | 0.71612 | 0.896856216 | 0.324675 | 0.002318 | hypermethylated |
| cg22704696 | 0.41018 | 0.51367027  | 0.324585 | 6.95E-05 | hypermethylated |
| cg06097580 | 0.67737 | 0.848238919 | 0.324527 | 0.002409 | hypermethylated |
| cg20585500 | 0.66787 | 0.836272973 | 0.324407 | 0.007667 | hypermethylated |
| cg08712082 | 0.71747 | 0.898369189 | 0.32439  | 0.001949 | hypermethylated |
| cg20054111 | 0.66862 | 0.837194595 | 0.324376 | 0.000725 | hypermethylated |
| cg24797276 | 0.57074 | 0.714591351 | 0.324285 | 0.007158 | hypermethylated |
| cg13772815 | 0.52182 | 0.653278919 | 0.324147 | 0.007282 | hypermethylated |
| cg09694921 | 0.53169 | 0.665591351 | 0.324051 | 0.004485 | hypermethylated |
| cg17311074 | 0.45262 | 0.566601622 | 0.324034 | 0.000733 | hypermethylated |
| cg09138865 | 0.61586 | 0.770911892 | 0.323964 | 0.002363 | hypermethylated |
| cg02311364 | 0.57985 | 0.72574973  | 0.323792 | 0.000112 | hypermethylated |
| cg08244181 | 0.58469 | 0.731804324 | 0.323786 | 0.010819 | hypermethylated |
| cg19041006 | 0.52408 | 0.655858919 | 0.323598 | 1.18E-05 | hypermethylated |
| cg26348803 | 0.64574 | 0.808036757 | 0.323468 | 0.004022 | hypermethylated |
| cg23259001 | 0.49969 | 0.625242703 | 0.323383 | 0.002318 | hypermethylated |
| cg01058717 | 0.7414  | 0.927609189 | 0.323265 | 0.004525 | hypermethylated |
| cg22737473 | 0.58959 | 0.737512432 | 0.322955 | 0.005706 | hypermethylated |
| cg14905657 | 0.4944  | 0.618394054 | 0.322848 | 5.38E-05 | hypermethylated |
| cg24903893 | 0.55992 | 0.700323784 | 0.322801 | 0.002502 | hypermethylated |



|            |         |             |          |          |                 |
|------------|---------|-------------|----------|----------|-----------------|
| cg03808577 | 0.53174 | 0.665074054 | 0.322794 | 0.003773 | hypermethylated |
| cg25492583 | 0.4203  | 0.525650811 | 0.322685 | 0.0003   | hypermethylated |
| cg17376609 | 0.63919 | 0.79936     | 0.322601 | 0.002274 | hypermethylated |
| cg21565421 | 0.49027 | 0.613058919 | 0.322449 | 0.000327 | hypermethylated |
| cg00940260 | 0.71562 | 0.894831351 | 0.322422 | 0.000931 | hypermethylated |
| cg04344749 | 0.47103 | 0.58890973  | 0.322228 | 0.000204 | hypermethylated |
| cg13292542 | 0.75226 | 0.940489189 | 0.32218  | 6.30E-05 | hypermethylated |
| cg12422704 | 0.49131 | 0.614221622 | 0.322126 | 1.25E-05 | hypermethylated |
| cg12932195 | 0.68917 | 0.861457297 | 0.321919 | 0.002274 | hypermethylated |
| cg19866325 | 0.73642 | 0.920509189 | 0.321903 | 0.000342 | hypermethylated |
| cg08296263 | 0.64161 | 0.801981622 | 0.321873 | 0.005459 | hypermethylated |
| cg14791193 | 0.66524 | 0.83147027  | 0.32179  | 0.000142 | hypermethylated |
| cg15437741 | 0.46837 | 0.585398919 | 0.321771 | 0.003473 | hypermethylated |
| cg02145310 | 0.50359 | 0.629417297 | 0.321767 | 7.56E-05 | hypermethylated |
| cg17074353 | 0.51313 | 0.641258919 | 0.321583 | 0.00015  | hypermethylated |
| cg19515186 | 0.67414 | 0.842437838 | 0.321522 | 0.01274  | hypermethylated |
| cg11880367 | 0.57456 | 0.717952432 | 0.321431 | 0.000224 | hypermethylated |
| cg16484042 | 0.582   | 0.727221622 | 0.321376 | 0.00035  | hypermethylated |
| cg04254769 | 0.63838 | 0.797638919 | 0.32132  | 4.94E-05 | hypermethylated |
| cg21719361 | 0.67629 | 0.845002162 | 0.321313 | 0.002502 | hypermethylated |
| cg26846409 | 0.47581 | 0.5945      | 0.321291 | 0.001603 | hypermethylated |
| cg26616258 | 0.74392 | 0.929482703 | 0.321281 | 5.86E-05 | hypermethylated |
| cg20284239 | 0.48106 | 0.601051892 | 0.321273 | 0.002725 | hypermethylated |
| cg13190608 | 0.59189 | 0.739378919 | 0.320985 | 0.001803 | hypermethylated |
| cg12252039 | 0.713   | 0.890666486 | 0.320983 | 0.000178 | hypermethylated |
| cg23287992 | 0.48076 | 0.600499459 | 0.320846 | 0.001481 | hypermethylated |
| cg12410310 | 0.53371 | 0.666609189 | 0.320785 | 0.019813 | hypermethylated |
| cg23398109 | 0.60244 | 0.752321081 | 0.320531 | 0.004022 | hypermethylated |
| cg21815337 | 0.55207 | 0.68940973  | 0.32051  | 0.016444 | hypermethylated |
| cg04835383 | 0.66022 | 0.82444     | 0.320468 | 0.006796 | hypermethylated |
| cg14724925 | 0.4765  | 0.594983243 | 0.320373 | 0.001237 | hypermethylated |
| cg17972789 | 0.67762 | 0.84607027  | 0.320301 | 0.022892 | hypermethylated |
| cg03444587 | 0.57355 | 0.716078919 | 0.320199 | 0.010381 | hypermethylated |
| cg10935498 | 0.56517 | 0.705595135 | 0.320156 | 0.001262 | hypermethylated |
| cg02243276 | 0.69546 | 0.868217838 | 0.32009  | 0.001751 | hypermethylated |
| cg24626310 | 0.49616 | 0.61940973  | 0.320089 | 0.013265 | hypermethylated |
| cg25211622 | 0.75115 | 0.937667027 | 0.319975 | 0.004566 | hypermethylated |
| cg26344513 | 0.63004 | 0.786474054 | 0.319956 | 0.001587 | hypermethylated |
| cg19372975 | 0.72874 | 0.909671892 | 0.319942 | 0.008069 | hypermethylated |
| cg05887092 | 0.55015 | 0.686735135 | 0.319929 | 7.65E-05 | hypermethylated |
| cg24042452 | 0.63993 | 0.798718919 | 0.319774 | 0.000293 | hypermethylated |
| cg23895963 | 0.50943 | 0.635761081 | 0.319601 | 0.000667 | hypermethylated |
| cg12489915 | 0.71626 | 0.893868108 | 0.319579 | 0.00495  | hypermethylated |
| cg06333307 | 0.62143 | 0.775498919 | 0.319533 | 0.006339 | hypermethylated |
| cg00128386 | 0.64359 | 0.803067027 | 0.319378 | 0.006855 | hypermethylated |
| cg04215359 | 0.67345 | 0.840322703 | 0.319373 | 0.000912 | hypermethylated |
| cg21539229 | 0.6165  | 0.76914973  | 0.319164 | 0.012036 | hypermethylated |
| cg11908453 | 0.62713 | 0.782388108 | 0.31912  | 0.010642 | hypermethylated |
| cg13572771 | 0.65937 | 0.822522703 | 0.318967 | 8.84E-05 | hypermethylated |
| cg24469013 | 0.57801 | 0.721030811 | 0.318966 | 0.006339 | hypermethylated |
| cg19936016 | 0.71553 | 0.892539459 | 0.318904 | 8.22E-05 | hypermethylated |
| cg13654884 | 0.6897  | 0.860264865 | 0.318812 | 0.000331 | hypermethylated |
| cg18456140 | 0.73583 | 0.917777838 | 0.318772 | 0.000109 | hypermethylated |
| cg12085501 | 0.63571 | 0.79286     | 0.318697 | 0.012948 | hypermethylated |
| cg12357484 | 0.55461 | 0.691580541 | 0.318424 | 1.14E-05 | hypermethylated |
| cg02203336 | 0.66426 | 0.8283      | 0.318405 | 0.000912 | hypermethylated |
| cg14362113 | 0.62421 | 0.778358378 | 0.318403 | 8.42E-05 | hypermethylated |
| cg24143766 | 0.59456 | 0.741363243 | 0.318358 | 0.031661 | hypermethylated |

|            |         |             |          |          |                 |
|------------|---------|-------------|----------|----------|-----------------|
| cg01407254 | 0.64526 | 0.804568649 | 0.318335 | 0.006564 | hypermethylated |
| cg08447992 | 0.70354 | 0.877216757 | 0.318301 | 0.000893 | hypermethylated |
| cg04553307 | 0.62405 | 0.77799027  | 0.31809  | 0.000688 | hypermethylated |
| cg26921611 | 0.69593 | 0.867595676 | 0.318081 | 0.000248 | hypermethylated |
| cg11426800 | 0.47194 | 0.588344865 | 0.318059 | 0.001288 | hypermethylated |
| cg17948913 | 0.68821 | 0.857912973 | 0.317982 | 0.00591  | hypermethylated |
| cg19196335 | 0.60542 | 0.754639459 | 0.317851 | 0.00623  | hypermethylated |
| cg03547757 | 0.61707 | 0.769155676 | 0.317841 | 1.97E-05 | hypermethylated |
| cg05203809 | 0.59398 | 0.740344865 | 0.317783 | 0.011554 | hypermethylated |
| cg03122674 | 0.54523 | 0.679524324 | 0.31766  | 0.001118 | hypermethylated |
| cg11143671 | 0.58974 | 0.734969189 | 0.317605 | 5.45E-05 | hypermethylated |
| cg26228014 | 0.60665 | 0.756002162 | 0.317526 | 0.000725 | hypermethylated |
| cg05533539 | 0.56896 | 0.708965405 | 0.317388 | 1.52E-05 | hypermethylated |
| cg07906331 | 0.59913 | 0.746425946 | 0.31713  | 0.016968 | hypermethylated |
| cg14514120 | 0.6369  | 0.793476757 | 0.317121 | 0.000741 | hypermethylated |
| cg02675546 | 0.69722 | 0.868451351 | 0.316831 | 0.001096 | hypermethylated |
| cg26992415 | 0.69483 | 0.865463243 | 0.316813 | 8.94E-05 | hypermethylated |
| cg21786381 | 0.4622  | 0.575703784 | 0.316809 | 0.002147 | hypermethylated |
| cg12440350 | 0.54307 | 0.676397838 | 0.316734 | 0.000109 | hypermethylated |
| cg22082456 | 0.57522 | 0.716413514 | 0.316679 | 0.026772 | hypermethylated |
| cg08289056 | 0.68102 | 0.848041081 | 0.316437 | 0.002106 | hypermethylated |
| cg11385933 | 0.47662 | 0.593491351 | 0.316388 | 7.84E-05 | hypermethylated |
| cg21660452 | 0.71763 | 0.893554595 | 0.316316 | 0.001541 | hypermethylated |
| cg14905600 | 0.75568 | 0.940886486 | 0.316245 | 0.001785 | hypermethylated |
| cg20866932 | 0.73749 | 0.918230811 | 0.316233 | 0.000626 | hypermethylated |
| cg11795921 | 0.63403 | 0.78927027  | 0.315968 | 0.001541 | hypermethylated |
| cg03928367 | 0.72101 | 0.89745027  | 0.315813 | 0.004059 | hypermethylated |
| cg10487418 | 0.60722 | 0.755742703 | 0.315676 | 0.002751 | hypermethylated |
| cg02851397 | 0.46522 | 0.578954595 | 0.315537 | 0.000209 | hypermethylated |
| cg21765730 | 0.63672 | 0.792361081 | 0.315499 | 0.010042 | hypermethylated |
| cg05058846 | 0.63585 | 0.791174595 | 0.31531  | 0.000109 | hypermethylated |
| cg27383174 | 0.60272 | 0.749934595 | 0.315277 | 0.025045 | hypermethylated |
| cg00260012 | 0.61961 | 0.770875676 | 0.315138 | 0.001052 | hypermethylated |
| cg01059818 | 0.68811 | 0.856039459 | 0.315038 | 8.42E-05 | hypermethylated |
| cg14684068 | 0.57512 | 0.715471351 | 0.315031 | 0.006284 | hypermethylated |
| cg11834658 | 0.68432 | 0.851158378 | 0.314756 | 0.004134 | hypermethylated |
| cg12647587 | 0.70248 | 0.8737      | 0.314681 | 0.006855 | hypermethylated |
| cg16757724 | 0.55315 | 0.687902162 | 0.314533 | 0.015439 | hypermethylated |
| cg06641279 | 0.64669 | 0.804227568 | 0.314529 | 0.000152 | hypermethylated |
| cg08042322 | 0.67012 | 0.833336757 | 0.31448  | 0.015076 | hypermethylated |
| cg12407978 | 0.54793 | 0.681348649 | 0.314402 | 0.000681 | hypermethylated |
| cg16929041 | 0.63442 | 0.788895676 | 0.314396 | 0.011554 | hypermethylated |
| cg07777344 | 0.58638 | 0.729086486 | 0.314254 | 0.028602 | hypermethylated |
| cg14978637 | 0.54544 | 0.678108649 | 0.314096 | 0.003107 | hypermethylated |
| cg24202221 | 0.68366 | 0.849919459 | 0.314047 | 0.001327 | hypermethylated |
| cg20501882 | 0.65367 | 0.812515676 | 0.313833 | 0.01274  | hypermethylated |
| cg04011995 | 0.63547 | 0.789874595 | 0.3138   | 0.000293 | hypermethylated |
| cg05825400 | 0.46668 | 0.579993514 | 0.313603 | 0.000104 | hypermethylated |
| cg20475035 | 0.43467 | 0.540177838 | 0.313514 | 0.000485 | hypermethylated |
| cg26010655 | 0.62691 | 0.778920541 | 0.313218 | 0.004526 | hypermethylated |
| cg02996583 | 0.62226 | 0.773081081 | 0.313102 | 0.000104 | hypermethylated |
| cg14570652 | 0.74767 | 0.928837838 | 0.313025 | 6.86E-05 | hypermethylated |
| cg17509681 | 0.72183 | 0.896655676 | 0.312895 | 0.000474 | hypermethylated |
| cg11664818 | 0.53665 | 0.666615135 | 0.312873 | 0.008348 | hypermethylated |
| cg15773539 | 0.47419 | 0.589001081 | 0.312805 | 0.000251 | hypermethylated |
| cg14416248 | 0.68976 | 0.856700541 | 0.312697 | 0.046224 | hypermethylated |
| cg09917805 | 0.55169 | 0.685165405 | 0.312594 | 0.000365 | hypermethylated |
| cg10656845 | 0.65151 | 0.809019459 | 0.312387 | 0.012036 | hypermethylated |

|            |         |             |          |          |                 |
|------------|---------|-------------|----------|----------|-----------------|
| cg15827843 | 0.68031 | 0.844773514 | 0.312372 | 0.008491 | hypermethylated |
| cg24219974 | 0.59584 | 0.739872432 | 0.312352 | 0.001587 | hypermethylated |
| cg17967673 | 0.61689 | 0.765992432 | 0.312317 | 0.00032  | hypermethylated |
| cg01760189 | 0.65389 | 0.811901081 | 0.312256 | 0.004445 | hypermethylated |
| cg21930842 | 0.50534 | 0.627443784 | 0.312232 | 0.018773 | hypermethylated |
| cg23201008 | 0.62204 | 0.772317838 | 0.312187 | 0.015317 | hypermethylated |
| cg25306511 | 0.60095 | 0.745977297 | 0.311887 | 0.012535 | hypermethylated |
| cg06009783 | 0.71061 | 0.881980541 | 0.311689 | 0.002086 | hypermethylated |
| cg21768604 | 0.73142 | 0.907671892 | 0.311471 | 0.001619 | hypermethylated |
| cg16510099 | 0.65624 | 0.814277838 | 0.311298 | 0.000293 | hypermethylated |
| cg26681183 | 0.6267  | 0.777608108 | 0.311268 | 0.000165 | hypermethylated |
| cg21706183 | 0.58556 | 0.726525405 | 0.311196 | 0.008857 | hypermethylated |
| cg27201802 | 0.55115 | 0.683794595 | 0.311118 | 0.0002   | hypermethylated |
| cg21049762 | 0.64341 | 0.798174054 | 0.310965 | 0.00151  | hypermethylated |
| cg07865267 | 0.64453 | 0.799472973 | 0.310802 | 0.006175 | hypermethylated |
| cg23007540 | 0.69515 | 0.862245405 | 0.310774 | 0.040844 | hypermethylated |
| cg08513123 | 0.52938 | 0.656620541 | 0.310756 | 0.001288 | hypermethylated |
| cg06050631 | 0.66236 | 0.821548649 | 0.31073  | 0.033532 | hypermethylated |
| cg09685096 | 0.6211  | 0.770361622 | 0.31071  | 0.002106 | hypermethylated |
| cg11661512 | 0.50148 | 0.62198     | 0.310676 | 0.00341  | hypermethylated |
| cg27160348 | 0.60885 | 0.75496     | 0.310313 | 0.001164 | hypermethylated |
| cg20645601 | 0.53619 | 0.664831892 | 0.310245 | 0.01392  | hypermethylated |
| cg07379703 | 0.56034 | 0.694763784 | 0.31022  | 0.000875 | hypermethylated |
| cg22879689 | 0.62622 | 0.776423243 | 0.310174 | 0.002649 | hypermethylated |
| cg05278955 | 0.6751  | 0.836931892 | 0.310009 | 0.00504  | hypermethylated |
| cg21550372 | 0.57835 | 0.716979459 | 0.309989 | 0.001262 | hypermethylated |
| cg13305657 | 0.41616 | 0.515848108 | 0.309808 | 0.006229 | hypermethylated |
| cg01860778 | 0.52802 | 0.654458378 | 0.309709 | 0.000696 | hypermethylated |
| cg07190914 | 0.66988 | 0.830226486 | 0.309602 | 0.000831 | hypermethylated |
| cg07985164 | 0.68491 | 0.848715676 | 0.309367 | 0.001381 | hypermethylated |
| cg27205902 | 0.70385 | 0.872183243 | 0.309363 | 0.013809 | hypermethylated |
| cg19699317 | 0.62558 | 0.775152973 | 0.309287 | 0.001275 | hypermethylated |
| cg10004079 | 0.67353 | 0.834515676 | 0.309197 | 0.010381 | hypermethylated |
| cg04248279 | 0.62852 | 0.778617297 | 0.308956 | 0.009238 | hypermethylated |
| cg04955511 | 0.65357 | 0.809643784 | 0.308946 | 0.001541 | hypermethylated |
| cg00775939 | 0.63368 | 0.784932432 | 0.308814 | 0.003255 | hypermethylated |
| cg20723705 | 0.63698 | 0.788991892 | 0.308762 | 0.037035 | hypermethylated |
| cg19878194 | 0.62677 | 0.77632973  | 0.308733 | 0.006451 | hypermethylated |
| cg05520988 | 0.66091 | 0.818574054 | 0.308659 | 0.035497 | hypermethylated |
| cg16236960 | 0.69994 | 0.866885405 | 0.30861  | 0.002965 | hypermethylated |
| cg10155304 | 0.57614 | 0.713540541 | 0.308576 | 0.000262 | hypermethylated |
| cg01068023 | 0.66618 | 0.825007027 | 0.308494 | 0.001619 | hypermethylated |
| cg08097359 | 0.52698 | 0.652612432 | 0.308478 | 7.12E-05 | hypermethylated |
| cg11229101 | 0.55568 | 0.688074595 | 0.308311 | 0.00017  | hypermethylated |
| cg04214946 | 0.73011 | 0.903956216 | 0.308139 | 0.000741 | hypermethylated |
| cg11878045 | 0.53685 | 0.664632432 | 0.308038 | 0.003441 | hypermethylated |
| cg20847228 | 0.66309 | 0.820852432 | 0.307918 | 0.002409 | hypermethylated |
| cg20656751 | 0.42767 | 0.529377838 | 0.3078   | 2.35E-05 | hypermethylated |
| cg04819959 | 0.67822 | 0.839394595 | 0.307596 | 0.000262 | hypermethylated |
| cg07421737 | 0.69793 | 0.863732432 | 0.307502 | 0.0017   | hypermethylated |
| cg14789214 | 0.47574 | 0.588655676 | 0.307251 | 0.000857 | hypermethylated |
| cg25952964 | 0.58903 | 0.728788108 | 0.307158 | 0.005364 | hypermethylated |
| cg10811502 | 0.62042 | 0.767601622 | 0.307113 | 0.003195 | hypermethylated |
| cg06741803 | 0.56743 | 0.702026486 | 0.307083 | 0.002066 | hypermethylated |
| cg17403512 | 0.56518 | 0.699229189 | 0.307055 | 4.94E-05 | hypermethylated |
| cg04760604 | 0.51943 | 0.642611351 | 0.307017 | 0.000138 | hypermethylated |
| cg12446446 | 0.70098 | 0.867185405 | 0.306967 | 0.002751 | hypermethylated |
| cg10032599 | 0.5375  | 0.664934595 | 0.306948 | 0.000358 | hypermethylated |

|            |         |             |          |          |                 |
|------------|---------|-------------|----------|----------|-----------------|
| cg27276079 | 0.7618  | 0.942342162 | 0.306839 | 0.001466 | hypermethylated |
| cg14609668 | 0.42451 | 0.525055135 | 0.30667  | 0.002751 | hypermethylated |
| cg02451516 | 0.71273 | 0.881519459 | 0.306637 | 0.010042 | hypermethylated |
| cg06638913 | 0.49244 | 0.608924324 | 0.306315 | 0.019661 | hypermethylated |
| cg07799299 | 0.62138 | 0.768348649 | 0.306285 | 0.000117 | hypermethylated |
| cg19094872 | 0.6617  | 0.818094054 | 0.306089 | 0.001085 | hypermethylated |
| cg25262548 | 0.68389 | 0.845523243 | 0.30608  | 0.022892 | hypermethylated |
| cg13649330 | 0.64358 | 0.795651351 | 0.306017 | 0.000495 | hypermethylated |
| cg15864104 | 0.68694 | 0.849244865 | 0.305996 | 0.005508 | hypermethylated |
| cg21787249 | 0.64685 | 0.799641081 | 0.305921 | 0.000696 | hypermethylated |
| cg26349266 | 0.51849 | 0.640957297 | 0.305912 | 4.20E-05 | hypermethylated |
| cg11401159 | 0.69772 | 0.862495135 | 0.305868 | 0.006339 | hypermethylated |
| cg24216555 | 0.61941 | 0.765644865 | 0.305781 | 0.009084 | hypermethylated |
| cg02952703 | 0.52933 | 0.654284865 | 0.305751 | 0.000317 | hypermethylated |
| cg26328893 | 0.66135 | 0.81740973  | 0.305645 | 0.003506 | hypermethylated |
| cg09591329 | 0.6847  | 0.846209189 | 0.305542 | 0.011554 | hypermethylated |
| cg18034637 | 0.59856 | 0.739654595 | 0.305356 | 0.010467 | hypermethylated |
| cg17373343 | 0.69322 | 0.856407027 | 0.304983 | 0.003136 | hypermethylated |
| cg19795594 | 0.67298 | 0.831372432 | 0.304931 | 0.001    | hypermethylated |
| cg12894814 | 0.66926 | 0.826595676 | 0.304615 | 0.004863 | hypermethylated |
| cg05526731 | 0.7527  | 0.929649189 | 0.304611 | 0.000168 | hypermethylated |
| cg00231300 | 0.45231 | 0.558634054 | 0.304592 | 0.005706 | hypermethylated |
| cg10486098 | 0.49895 | 0.616163243 | 0.304417 | 0.000234 | hypermethylated |
| cg14063129 | 0.65825 | 0.812824865 | 0.304309 | 0.001603 | hypermethylated |
| cg01542143 | 0.65335 | 0.806567027 | 0.303938 | 0.009238 | hypermethylated |
| cg10987503 | 0.57358 | 0.708023784 | 0.303803 | 0.002363 | hypermethylated |
| cg13762320 | 0.5928  | 0.731626486 | 0.303562 | 6.31E-05 | hypermethylated |
| cg16670307 | 0.67412 | 0.831891892 | 0.303391 | 0.001188 | hypermethylated |
| cg07703790 | 0.62588 | 0.772352973 | 0.303374 | 0.004776 | hypermethylated |
| cg18164305 | 0.53272 | 0.657156216 | 0.302859 | 0.004863 | hypermethylated |
| cg24301352 | 0.60374 | 0.744754054 | 0.302837 | 0.003021 | hypermethylated |
| cg08139729 | 0.64552 | 0.796150811 | 0.30258  | 0.004445 | hypermethylated |
| cg19959917 | 0.52967 | 0.653244865 | 0.30253  | 4.36E-05 | hypermethylated |
| cg05977021 | 0.65866 | 0.812157838 | 0.302226 | 0.006564 | hypermethylated |
| cg23746628 | 0.68002 | 0.838456757 | 0.302159 | 0.011649 | hypermethylated |
| cg16908948 | 0.68165 | 0.840453514 | 0.302137 | 0.000293 | hypermethylated |
| cg20707409 | 0.62404 | 0.769374595 | 0.302048 | 0.000274 | hypermethylated |
| cg12923203 | 0.72462 | 0.893194054 | 0.301749 | 0.000764 | hypermethylated |
| cg08133669 | 0.69101 | 0.851718919 | 0.301671 | 0.013589 | hypermethylated |
| cg19389397 | 0.51992 | 0.640810811 | 0.301609 | 0.005316 | hypermethylated |
| cg13191508 | 0.72529 | 0.893904324 | 0.301562 | 2.46E-06 | hypermethylated |
| cg05578673 | 0.66598 | 0.820791351 | 0.301537 | 0.040844 | hypermethylated |
| cg02642565 | 0.62135 | 0.765708108 | 0.301388 | 0.002318 | hypermethylated |
| cg19854437 | 0.62625 | 0.771721622 | 0.301342 | 0.004059 | hypermethylated |
| cg14029170 | 0.65187 | 0.803264865 | 0.301291 | 0.002231 | hypermethylated |
| cg14535746 | 0.70511 | 0.868763243 | 0.301115 | 0.002803 | hypermethylated |
| cg02163943 | 0.70164 | 0.864404865 | 0.300976 | 0.022892 | hypermethylated |
| cg16781502 | 0.56832 | 0.700136216 | 0.300932 | 0.013053 | hypermethylated |
| cg04585435 | 0.68244 | 0.84057027  | 0.300666 | 0.001541 | hypermethylated |
| cg01637244 | 0.6964  | 0.857758919 | 0.300656 | 0.002046 | hypermethylated |
| cg15952725 | 0.70854 | 0.872681081 | 0.300605 | 0.002699 | hypermethylated |
| cg17750109 | 0.52296 | 0.644076216 | 0.300531 | 0.000805 | hypermethylated |
| cg06262497 | 0.7292  | 0.89801027  | 0.300417 | 0.0171   | hypermethylated |
| cg10306035 | 0.65585 | 0.807632432 | 0.300333 | 0.00054  | hypermethylated |
| cg06730678 | 0.67572 | 0.832083784 | 0.300303 | 0.003671 | hypermethylated |
| cg13792694 | 0.74129 | 0.91281027  | 0.300277 | 0.003773 | hypermethylated |
| cg13195955 | 0.51965 | 0.63986     | 0.300216 | 0.000528 | hypermethylated |
| cg04147272 | 0.68831 | 0.84750973  | 0.300171 | 0.013589 | hypermethylated |

|            |         |             |          |          |                 |
|------------|---------|-------------|----------|----------|-----------------|
| cg02733081 | 0.62293 | 0.766994595 | 0.300146 | 0.042869 | hypermethylated |
| cg04509682 | 0.68886 | 0.848092973 | 0.300012 | 0.03189  | hypermethylated |
| cg16763574 | 0.75292 | 0.926948649 | 0.299993 | 0.000115 | hypermethylated |
| cg14168269 | 0.64735 | 0.796880541 | 0.299818 | 0.000137 | hypermethylated |
| cg04607024 | 0.68511 | 0.843345946 | 0.299789 | 9.27E-05 | hypermethylated |
| cg27639142 | 0.53299 | 0.655836757 | 0.299228 | 0.00066  | hypermethylated |
| cg01009486 | 0.63373 | 0.779762162 | 0.299166 | 0.002699 | hypermethylated |
| cg19689151 | 0.66773 | 0.821582162 | 0.29914  | 0.00421  | hypermethylated |
| cg12251895 | 0.59828 | 0.735988108 | 0.298862 | 0.003506 | hypermethylated |
| cg00502618 | 0.72381 | 0.890296757 | 0.298675 | 0.00645  | hypermethylated |
| cg06813419 | 0.68461 | 0.842077838 | 0.298671 | 0.012234 | hypermethylated |
| cg01239389 | 0.45097 | 0.554604865 | 0.298429 | 0.002318 | hypermethylated |
| cg01973394 | 0.51438 | 0.632481622 | 0.298189 | 0.000338 | hypermethylated |
| cg20345915 | 0.64141 | 0.788657838 | 0.298153 | 1.94E-05 | hypermethylated |
| cg03654783 | 0.57651 | 0.708837297 | 0.298109 | 0.000224 | hypermethylated |
| cg12729166 | 0.6508  | 0.800141622 | 0.298041 | 4.26E-05 | hypermethylated |
| cg09226986 | 0.62674 | 0.770497838 | 0.297924 | 0.004326 | hypermethylated |
| cg13912196 | 0.68316 | 0.839825405 | 0.297866 | 0.016835 | hypermethylated |
| cg02657828 | 0.53265 | 0.654728649 | 0.297709 | 0.001052 | hypermethylated |
| cg03704667 | 0.68136 | 0.837471892 | 0.297624 | 0.003378 | hypermethylated |
| cg15944367 | 0.56561 | 0.695197838 | 0.297616 | 0.004567 | hypermethylated |
| cg08688393 | 0.52787 | 0.648751892 | 0.297484 | 0.015561 | hypermethylated |
| cg10845893 | 0.69667 | 0.856164865 | 0.297413 | 0.000797 | hypermethylated |
| cg02387701 | 0.57607 | 0.707942162 | 0.297387 | 0.009084 | hypermethylated |
| cg11071407 | 0.67775 | 0.832862162 | 0.297325 | 0.00064  | hypermethylated |
| cg07514159 | 0.6114  | 0.751324324 | 0.297319 | 1.15E-05 | hypermethylated |
| cg24313571 | 0.65752 | 0.807982162 | 0.297289 | 0.049797 | hypermethylated |
| cg23538468 | 0.65772 | 0.808201622 | 0.297242 | 0.00039  | hypermethylated |
| cg15527168 | 0.66123 | 0.812439459 | 0.297108 | 0.00101  | hypermethylated |
| cg24186506 | 0.69736 | 0.85674973  | 0.29697  | 0.001052 | hypermethylated |
| cg24530480 | 0.64443 | 0.791718378 | 0.296964 | 0.019965 | hypermethylated |
| cg21313071 | 0.6426  | 0.789352973 | 0.29675  | 0.000109 | hypermethylated |
| cg18147865 | 0.62481 | 0.767463784 | 0.296681 | 0.000588 | hypermethylated |
| cg13618880 | 0.68476 | 0.841031351 | 0.296561 | 0.007732 | hypermethylated |
| cg02732915 | 0.6614  | 0.812327027 | 0.296538 | 0.000459 | hypermethylated |
| cg10523671 | 0.70333 | 0.863683784 | 0.296301 | 0.002231 | hypermethylated |
| cg06948989 | 0.46499 | 0.570939459 | 0.296138 | 0.000354 | hypermethylated |
| cg13983640 | 0.63014 | 0.773631351 | 0.295974 | 0.019965 | hypermethylated |
| cg09632858 | 0.74347 | 0.912557838 | 0.295641 | 0.004209 | hypermethylated |
| cg11311053 | 0.48426 | 0.594383784 | 0.295613 | 0.00071  | hypermethylated |
| cg27392802 | 0.73424 | 0.900999459 | 0.295275 | 0.006505 | hypermethylated |
| cg04146259 | 0.67707 | 0.830776216 | 0.295155 | 0.012234 | hypermethylated |
| cg07926644 | 0.62389 | 0.765494054 | 0.295099 | 0.003195 | hypermethylated |
| cg12381873 | 0.55    | 0.674801081 | 0.295031 | 0.000313 | hypermethylated |
| cg06243084 | 0.71392 | 0.875761081 | 0.294775 | 0.00017  | hypermethylated |
| cg04269530 | 0.50959 | 0.625012973 | 0.294549 | 0.000115 | hypermethylated |
| cg02738641 | 0.56241 | 0.689774595 | 0.294503 | 0.002599 | hypermethylated |
| cg10254035 | 0.65435 | 0.80253027  | 0.294493 | 0.014145 | hypermethylated |
| cg09567180 | 0.63721 | 0.781411351 | 0.294313 | 0.008857 | hypermethylated |
| cg07537750 | 0.58896 | 0.722239459 | 0.294308 | 0.020273 | hypermethylated |
| cg02556042 | 0.45644 | 0.559722703 | 0.294287 | 0.001949 | hypermethylated |
| cg18700428 | 0.5362  | 0.657473514 | 0.294162 | 7.12E-05 | hypermethylated |
| cg13173552 | 0.57834 | 0.70913027  | 0.294133 | 0.004326 | hypermethylated |
| cg14554244 | 0.5038  | 0.61758     | 0.293775 | 0.000551 | hypermethylated |
| cg04446870 | 0.62696 | 0.768542703 | 0.293752 | 0.009959 | hypermethylated |
| cg16454316 | 0.66126 | 0.810562162 | 0.293705 | 0.000107 | hypermethylated |
| cg12786452 | 0.67328 | 0.825293514 | 0.293701 | 0.006679 | hypermethylated |
| cg02856026 | 0.56484 | 0.692314054 | 0.293584 | 0.022549 | hypermethylated |

|            |         |             |          |          |                 |
|------------|---------|-------------|----------|----------|-----------------|
| cg25113462 | 0.69728 | 0.854596216 | 0.293505 | 0.004059 | hypermethylated |
| cg23134259 | 0.71752 | 0.879400541 | 0.293501 | 0.014956 | hypermethylated |
| cg19919217 | 0.61767 | 0.756994595 | 0.293447 | 0.007933 | hypermethylated |
| cg27445278 | 0.67181 | 0.82330973  | 0.293382 | 0.004995 | hypermethylated |
| cg05221264 | 0.65676 | 0.804771351 | 0.293213 | 0.001141 | hypermethylated |
| cg25657700 | 0.54191 | 0.664021081 | 0.293176 | 0.000374 | hypermethylated |
| cg26105076 | 0.53084 | 0.650455676 | 0.293174 | 0.000551 | hypermethylated |
| cg06043908 | 0.52021 | 0.637422162 | 0.293155 | 0.006015 | hypermethylated |
| cg09274961 | 0.59842 | 0.73325027  | 0.293147 | 0.008636 | hypermethylated |
| cg19816642 | 0.40434 | 0.4954      | 0.293025 | 0.000588 | hypermethylated |
| cg17839324 | 0.57403 | 0.703295135 | 0.293004 | 0.00102  | hypermethylated |
| cg07554664 | 0.48735 | 0.597067568 | 0.292936 | 0.034997 | hypermethylated |
| cg03152428 | 0.56094 | 0.687095676 | 0.292665 | 0.003316 | hypermethylated |
| cg08765199 | 0.65422 | 0.801339459 | 0.292638 | 0.025232 | hypermethylated |
| cg03844894 | 0.51286 | 0.62815027  | 0.292545 | 0.000327 | hypermethylated |
| cg00436254 | 0.48709 | 0.596574595 | 0.292514 | 0.001107 | hypermethylated |
| cg19814174 | 0.74093 | 0.907458919 | 0.292495 | 0.000893 | hypermethylated |
| cg03267742 | 0.5601  | 0.685978378 | 0.292479 | 0.041414 | hypermethylated |
| cg00597931 | 0.66827 | 0.818425405 | 0.29242  | 0.023947 | hypermethylated |
| cg16537483 | 0.61847 | 0.757408108 | 0.292367 | 0.000528 | hypermethylated |
| cg05714552 | 0.41584 | 0.509241081 | 0.29232  | 4.05E-05 | hypermethylated |
| cg26879339 | 0.66647 | 0.816147027 | 0.292289 | 0.01274  | hypermethylated |
| cg18354248 | 0.7326  | 0.896937838 | 0.291982 | 0.008563 | hypermethylated |
| cg03553613 | 0.6953  | 0.851268649 | 0.291979 | 7.29E-05 | hypermethylated |
| cg05987548 | 0.57006 | 0.697857838 | 0.291819 | 0.001118 | hypermethylated |
| cg10647547 | 0.68447 | 0.837894054 | 0.291781 | 0.00916  | hypermethylated |
| cg13877715 | 0.57505 | 0.703918378 | 0.291721 | 0.012434 | hypermethylated |
| cg00320608 | 0.63403 | 0.775937297 | 0.291389 | 0.009959 | hypermethylated |
| cg03533058 | 0.54732 | 0.669817297 | 0.291383 | 0.003704 | hypermethylated |
| cg16550651 | 0.64419 | 0.788303243 | 0.291264 | 0.000166 | hypermethylated |
| cg24010859 | 0.54137 | 0.662399459 | 0.291087 | 0.023066 | hypermethylated |
| cg09569989 | 0.71587 | 0.875888649 | 0.29105  | 1.60E-05 | hypermethylated |
| cg14352682 | 0.47542 | 0.581624865 | 0.290886 | 0.002649 | hypermethylated |
| cg13569987 | 0.68603 | 0.83928     | 0.290881 | 0.00291  | hypermethylated |
| cg08535058 | 0.56411 | 0.68996973  | 0.290557 | 0.000204 | hypermethylated |
| cg09427374 | 0.70957 | 0.867794054 | 0.290408 | 0.004287 | hypermethylated |
| cg18130905 | 0.69549 | 0.850500541 | 0.290282 | 0.002409 | hypermethylated |
| cg07220650 | 0.53768 | 0.657517838 | 0.290282 | 0.002699 | hypermethylated |
| cg21190038 | 0.60327 | 0.737702162 | 0.290235 | 0.003021 | hypermethylated |
| cg07297322 | 0.65777 | 0.80420973  | 0.289989 | 0.001541 | hypermethylated |
| cg27109006 | 0.64033 | 0.782815676 | 0.289857 | 0.02324  | hypermethylated |
| cg05075579 | 0.46374 | 0.566911351 | 0.289807 | 0.000209 | hypermethylated |
| cg21198455 | 0.75452 | 0.922312432 | 0.289696 | 0.001684 | hypermethylated |
| cg13898875 | 0.61156 | 0.747536757 | 0.28965  | 0.002231 | hypermethylated |
| cg25732961 | 0.77793 | 0.950452432 | 0.288974 | 0.001716 | hypermethylated |
| cg00028844 | 0.5231  | 0.639065946 | 0.288878 | 0.01146  | hypermethylated |
| cg09571369 | 0.62645 | 0.765260541 | 0.288752 | 0.000152 | hypermethylated |
| cg04969428 | 0.61769 | 0.754428649 | 0.288501 | 0.023948 | hypermethylated |
| cg01819995 | 0.67585 | 0.825444865 | 0.288469 | 0.002253 | hypermethylated |
| cg03473377 | 0.663   | 0.809744865 | 0.288459 | 0.000511 | hypermethylated |
| cg01670896 | 0.71508 | 0.873318919 | 0.288404 | 0.01073  | hypermethylated |
| cg11809668 | 0.5903  | 0.720840541 | 0.288232 | 0.004365 | hypermethylated |
| cg19946376 | 0.53536 | 0.653708649 | 0.288138 | 0.003021 | hypermethylated |
| cg13927454 | 0.63585 | 0.776337838 | 0.287998 | 0.004248 | hypermethylated |
| cg13891539 | 0.69108 | 0.843665946 | 0.287819 | 0.000633 | hypermethylated |
| cg26187962 | 0.59013 | 0.720426486 | 0.287818 | 0.000293 | hypermethylated |
| cg08944029 | 0.59866 | 0.730824324 | 0.287788 | 0.004059 | hypermethylated |
| cg20002958 | 0.71466 | 0.872407027 | 0.287744 | 0.005606 | hypermethylated |

|            |         |             |          |          |                 |
|------------|---------|-------------|----------|----------|-----------------|
| cg10853431 | 0.62914 | 0.767982162 | 0.287692 | 0.002725 | hypermethylated |
| cg26053291 | 0.62245 | 0.759798919 | 0.28766  | 0.000501 | hypermethylated |
| cg04220930 | 0.64624 | 0.788836757 | 0.287657 | 0.001525 | hypermethylated |
| cg14958141 | 0.65013 | 0.793522162 | 0.287542 | 0.007536 | hypermethylated |
| cg08170911 | 0.45091 | 0.550335676 | 0.287472 | 0.000138 | hypermethylated |
| cg09053536 | 0.64428 | 0.786256216 | 0.287312 | 0.008001 | hypermethylated |
| cg21932672 | 0.68948 | 0.841308649 | 0.287126 | 0.00031  | hypermethylated |
| cg26675485 | 0.58823 | 0.717748108 | 0.287097 | 0.005808 | hypermethylated |
| cg03557916 | 0.69802 | 0.851697297 | 0.287072 | 0.001288 | hypermethylated |
| cg14129589 | 0.68356 | 0.834045946 | 0.287059 | 0.000204 | hypermethylated |
| cg06813782 | 0.65842 | 0.803295135 | 0.286922 | 0.011274 | hypermethylated |
| cg00790847 | 0.71061 | 0.86692973  | 0.286857 | 0.001437 | hypermethylated |
| cg09056876 | 0.69777 | 0.851197297 | 0.286742 | 0.001052 | hypermethylated |
| cg02642962 | 0.74102 | 0.903930811 | 0.2867   | 0.001785 | hypermethylated |
| cg21680729 | 0.58629 | 0.715032973 | 0.286395 | 0.001667 | hypermethylated |
| cg22238209 | 0.49447 | 0.602996757 | 0.286267 | 0.003843 | hypermethylated |
| cg12598606 | 0.56937 | 0.69415027  | 0.285882 | 0.003225 | hypermethylated |
| cg07850896 | 0.70368 | 0.857877838 | 0.285853 | 0.013589 | hypermethylated |
| cg22934200 | 0.64202 | 0.782678919 | 0.285802 | 0.003506 | hypermethylated |
| cg21343223 | 0.42699 | 0.520535135 | 0.285793 | 1.50E-05 | hypermethylated |
| cg26575637 | 0.48377 | 0.589721622 | 0.285713 | 8.84E-05 | hypermethylated |
| cg25133533 | 0.48823 | 0.595134054 | 0.285654 | 6.78E-05 | hypermethylated |
| cg09635533 | 0.48122 | 0.586439459 | 0.285286 | 0.0003   | hypermethylated |
| cg11312087 | 0.65465 | 0.797608649 | 0.284957 | 0.024675 | hypermethylated |
| cg05377041 | 0.57997 | 0.706588649 | 0.284892 | 0.004566 | hypermethylated |
| cg21621104 | 0.6948  | 0.846438378 | 0.284807 | 0.020902 | hypermethylated |
| cg02348119 | 0.62777 | 0.76476973  | 0.284789 | 0.00221  | hypermethylated |
| cg15426006 | 0.57314 | 0.698161622 | 0.284673 | 3.15E-05 | hypermethylated |
| cg19849478 | 0.66436 | 0.809207027 | 0.284544 | 0.021878 | hypermethylated |
| cg11231143 | 0.57954 | 0.705773514 | 0.284297 | 0.000209 | hypermethylated |
| cg16146718 | 0.74875 | 0.911792432 | 0.284221 | 0.001    | hypermethylated |
| cg19528797 | 0.71881 | 0.87532973  | 0.284216 | 0.008491 | hypermethylated |
| cg10595406 | 0.69944 | 0.851690811 | 0.284129 | 0.002126 | hypermethylated |
| cg19938826 | 0.7216  | 0.87866     | 0.284106 | 0.010909 | hypermethylated |
| cg18434588 | 0.65079 | 0.792415135 | 0.284064 | 0.003843 | hypermethylated |
| cg26866142 | 0.7499  | 0.913072973 | 0.284032 | 0.047819 | hypermethylated |
| cg05926586 | 0.67311 | 0.819537838 | 0.283968 | 0.001262 | hypermethylated |
| cg12743419 | 0.53445 | 0.650709189 | 0.283958 | 0.001541 | hypermethylated |
| cg05260714 | 0.64844 | 0.789485946 | 0.28394  | 0.011841 | hypermethylated |
| cg14596987 | 0.71399 | 0.869185405 | 0.28376  | 0.000681 | hypermethylated |
| cg12853539 | 0.72184 | 0.878585405 | 0.283503 | 0.001288 | hypermethylated |
| cg19253850 | 0.60168 | 0.732271351 | 0.283382 | 0.002126 | hypermethylated |
| cg06730250 | 0.4811  | 0.585462703 | 0.28324  | 0.008208 | hypermethylated |
| cg14601053 | 0.56505 | 0.687555676 | 0.283098 | 0.003441 | hypermethylated |
| cg17256234 | 0.72057 | 0.876714595 | 0.282969 | 0.001367 | hypermethylated |
| cg07272353 | 0.5356  | 0.651656757 | 0.282956 | 0.011841 | hypermethylated |
| cg07949011 | 0.65456 | 0.796160541 | 0.282534 | 0.003986 | hypermethylated |
| cg17172761 | 0.617   | 0.750458919 | 0.282503 | 0.002066 | hypermethylated |
| cg19261306 | 0.65581 | 0.797523784 | 0.28225  | 0.033532 | hypermethylated |
| cg19539519 | 0.72391 | 0.880244324 | 0.282094 | 0.000287 | hypermethylated |
| cg14841514 | 0.63221 | 0.768663243 | 0.281948 | 0.000361 | hypermethylated |
| cg27616541 | 0.65283 | 0.793730811 | 0.281942 | 0.000248 | hypermethylated |
| cg01068906 | 0.53359 | 0.648706486 | 0.281834 | 6.95E-05 | hypermethylated |
| cg00892368 | 0.63624 | 0.773495135 | 0.281821 | 0.000126 | hypermethylated |
| cg22328746 | 0.6463  | 0.785596757 | 0.281585 | 0.000182 | hypermethylated |
| cg27462475 | 0.67926 | 0.825549189 | 0.28139  | 0.00395  | hypermethylated |
| cg25364273 | 0.63616 | 0.773112973 | 0.28129  | 0.000346 | hypermethylated |
| cg22290117 | 0.53736 | 0.653026486 | 0.281253 | 0.000245 | hypermethylated |

|            |         |             |          |          |                 |
|------------|---------|-------------|----------|----------|-----------------|
| cg02198895 | 0.58885 | 0.71558973  | 0.281233 | 0.000563 | hypermethylated |
| cg00905101 | 0.5446  | 0.661814054 | 0.281229 | 0.000137 | hypermethylated |
| cg02485328 | 0.63511 | 0.77163027  | 0.280903 | 0.001717 | hypermethylated |
| cg26557834 | 0.6387  | 0.775922162 | 0.280773 | 0.034258 | hypermethylated |
| cg10505024 | 0.48584 | 0.590218378 | 0.280768 | 0.00513  | hypermethylated |
| cg16475811 | 0.63137 | 0.767009189 | 0.280758 | 0.002106 | hypermethylated |
| cg04170948 | 0.619   | 0.751897297 | 0.280596 | 0.000148 | hypermethylated |
| cg23295647 | 0.52734 | 0.640525946 | 0.280524 | 8.13E-05 | hypermethylated |
| cg02630854 | 0.68076 | 0.826854595 | 0.280487 | 2.51E-05 | hypermethylated |
| cg04652943 | 0.65063 | 0.79014973  | 0.280289 | 0.000112 | hypermethylated |
| cg00421335 | 0.57102 | 0.693466486 | 0.280285 | 0.001541 | hypermethylated |
| cg20122586 | 0.56129 | 0.68162973  | 0.280242 | 0.045598 | hypermethylated |
| cg19246065 | 0.53537 | 0.650102703 | 0.280131 | 0.016061 | hypermethylated |
| cg21972431 | 0.70616 | 0.857491892 | 0.280128 | 0.039173 | hypermethylated |
| cg06334484 | 0.53551 | 0.650258378 | 0.2801   | 0.000756 | hypermethylated |
| cg11281005 | 0.75377 | 0.915280541 | 0.28009  | 0.014372 | hypermethylated |
| cg15883603 | 0.616   | 0.747924324 | 0.279962 | 0.001423 | hypermethylated |
| cg02377941 | 0.50622 | 0.614622703 | 0.279937 | 8.42E-05 | hypermethylated |
| cg04812726 | 0.62757 | 0.761853514 | 0.279737 | 0.008491 | hypermethylated |
| cg07872947 | 0.6367  | 0.77288     | 0.279631 | 0.003773 | hypermethylated |
| cg01034631 | 0.59119 | 0.717501622 | 0.27936  | 0.013589 | hypermethylated |
| cg03229033 | 0.41632 | 0.505247568 | 0.279298 | 0.000104 | hypermethylated |
| cg25985263 | 0.51849 | 0.629187568 | 0.279174 | 0.001118 | hypermethylated |
| cg06707356 | 0.69971 | 0.849077297 | 0.279139 | 0.015809 | hypermethylated |
| cg24380053 | 0.61452 | 0.745564324 | 0.278873 | 0.010642 | hypermethylated |
| cg00210133 | 0.65144 | 0.790240541 | 0.27866  | 0.006015 | hypermethylated |
| cg04423294 | 0.61979 | 0.751806486 | 0.278582 | 0.007799 | hypermethylated |
| cg19259125 | 0.74814 | 0.907472432 | 0.278546 | 0.016835 | hypermethylated |
| cg04944090 | 0.72497 | 0.879333514 | 0.278489 | 0.001541 | hypermethylated |
| cg20335293 | 0.63873 | 0.774612432 | 0.278268 | 0.003773 | hypermethylated |
| cg23346969 | 0.52998 | 0.642696757 | 0.2782   | 0.002007 | hypermethylated |
| cg19002907 | 0.66099 | 0.801556757 | 0.278176 | 0.000262 | hypermethylated |
| cg12154110 | 0.54949 | 0.666332973 | 0.27815  | 0.001571 | hypermethylated |
| cg00575672 | 0.63922 | 0.775096757 | 0.278064 | 0.003441 | hypermethylated |
| cg20669572 | 0.56343 | 0.68319027  | 0.278051 | 2.32E-05 | hypermethylated |
| cg17924901 | 0.60263 | 0.730628108 | 0.277865 | 0.000831 | hypermethylated |
| cg02197303 | 0.64431 | 0.780943784 | 0.277464 | 0.001667 | hypermethylated |
| cg00582941 | 0.55648 | 0.674378378 | 0.277228 | 0.02988  | hypermethylated |
| cg04880278 | 0.59245 | 0.717957297 | 0.277205 | 0.003136 | hypermethylated |
| cg15245556 | 0.63313 | 0.767214054 | 0.277127 | 0.0006   | hypermethylated |
| cg00883123 | 0.61187 | 0.741421622 | 0.277069 | 0.002526 | hypermethylated |
| cg02460314 | 0.6983  | 0.846132973 | 0.277037 | 0.004287 | hypermethylated |
| cg04870949 | 0.7118  | 0.862450811 | 0.27697  | 0.001571 | hypermethylated |
| cg02430183 | 0.68361 | 0.828274595 | 0.276936 | 0.00097  | hypermethylated |
| cg01591037 | 0.69597 | 0.843206486 | 0.276861 | 0.000204 | hypermethylated |
| cg11418681 | 0.63142 | 0.764944865 | 0.276756 | 0.002965 | hypermethylated |
| cg03416228 | 0.54357 | 0.658504324 | 0.276727 | 0.002106 | hypermethylated |
| cg05964918 | 0.69987 | 0.847699459 | 0.276466 | 0.002253 | hypermethylated |
| cg27058882 | 0.53242 | 0.644718378 | 0.276104 | 0.000912 | hypermethylated |
| cg11466131 | 0.69621 | 0.843033514 | 0.276067 | 0.005085 | hypermethylated |
| cg06469895 | 0.5813  | 0.703838919 | 0.275962 | 0.00094  | hypermethylated |
| cg23230158 | 0.68375 | 0.827534054 | 0.27535  | 0.003136 | hypermethylated |
| cg21101386 | 0.60709 | 0.734676216 | 0.275198 | 0.006175 | hypermethylated |
| cg08080923 | 0.74176 | 0.897647027 | 0.275196 | 0.001603 | hypermethylated |
| cg09220563 | 0.68307 | 0.826618378 | 0.275188 | 0.000931 | hypermethylated |
| cg26348521 | 0.67606 | 0.818126486 | 0.275173 | 0.005756 | hypermethylated |
| cg11988604 | 0.60252 | 0.729120541 | 0.275148 | 0.016835 | hypermethylated |
| cg11442877 | 0.62144 | 0.751957297 | 0.275036 | 0.007408 | hypermethylated |



|            |         |             |          |          |                 |
|------------|---------|-------------|----------|----------|-----------------|
| cg00316312 | 0.49994 | 0.604862703 | 0.274853 | 0.003078 | hypermethylated |
| cg12658374 | 0.63327 | 0.766082703 | 0.274679 | 6.31E-05 | hypermethylated |
| cg00905220 | 0.70854 | 0.857119459 | 0.274647 | 0.006855 | hypermethylated |
| cg10179363 | 0.67894 | 0.821302703 | 0.27463  | 0.02272  | hypermethylated |
| cg17295053 | 0.62196 | 0.752355676 | 0.274593 | 0.006975 | hypermethylated |
| cg04029933 | 0.71185 | 0.86097027  | 0.27439  | 0.013265 | hypermethylated |
| cg08092050 | 0.71441 | 0.863992432 | 0.274266 | 0.002274 | hypermethylated |
| cg05778278 | 0.65115 | 0.787451892 | 0.274202 | 0.000875 | hypermethylated |
| cg25680629 | 0.65178 | 0.788203243 | 0.274183 | 0.011649 | hypermethylated |
| cg26284985 | 0.66104 | 0.799247568 | 0.273905 | 0.012036 | hypermethylated |
| cg17086686 | 0.62331 | 0.753605946 | 0.27386  | 0.000129 | hypermethylated |
| cg02333960 | 0.67974 | 0.82176     | 0.273734 | 0.002253 | hypermethylated |
| cg23224619 | 0.57864 | 0.699531892 | 0.273724 | 0.00064  | hypermethylated |
| cg17192381 | 0.67965 | 0.821604865 | 0.273653 | 0.005606 | hypermethylated |
| cg20227326 | 0.69085 | 0.835115676 | 0.273604 | 0.001768 | hypermethylated |
| cg04732596 | 0.606   | 0.732515676 | 0.273542 | 0.014604 | hypermethylated |
| cg13977835 | 0.58613 | 0.708208108 | 0.272953 | 0.000696 | hypermethylated |
| cg21631754 | 0.67005 | 0.809464324 | 0.272699 | 0.010642 | hypermethylated |
| cg16686174 | 0.68478 | 0.827203784 | 0.272602 | 0.001225 | hypermethylated |
| cg00661855 | 0.57647 | 0.696336757 | 0.27254  | 0.024128 | hypermethylated |
| cg26681523 | 0.72066 | 0.870268108 | 0.272141 | 0.004287 | hypermethylated |
| cg10604373 | 0.69303 | 0.836763243 | 0.271902 | 0.000613 | hypermethylated |
| cg07492143 | 0.67579 | 0.815917297 | 0.271848 | 0.001395 | hypermethylated |
| cg22288657 | 0.68823 | 0.830926486 | 0.27183  | 0.015438 | hypermethylated |
| cg14024893 | 0.73069 | 0.882178378 | 0.271811 | 0.000204 | hypermethylated |
| cg22860848 | 0.57018 | 0.688381622 | 0.271791 | 0.02324  | hypermethylated |
| cg06186808 | 0.67188 | 0.810687568 | 0.270942 | 0.000271 | hypermethylated |
| cg05062620 | 0.60399 | 0.728762703 | 0.270924 | 0.008783 | hypermethylated |
| cg15473155 | 0.59003 | 0.711902703 | 0.270892 | 7.93E-05 | hypermethylated |
| cg03983058 | 0.679   | 0.819237838 | 0.270871 | 0.007732 | hypermethylated |
| cg14029580 | 0.69929 | 0.843647027 | 0.270749 | 0.002253 | hypermethylated |
| cg05375744 | 0.64205 | 0.774499459 | 0.270579 | 0.00078  | hypermethylated |
| cg15107132 | 0.5326  | 0.642466486 | 0.270569 | 0.003195 | hypermethylated |
| cg00352652 | 0.74121 | 0.894081081 | 0.270523 | 0.002699 | hypermethylated |
| cg16557964 | 0.67508 | 0.814271351 | 0.270451 | 0.006451 | hypermethylated |
| cg06582663 | 0.78671 | 0.948885405 | 0.270402 | 0.001073 | hypermethylated |
| cg14014225 | 0.6492  | 0.782950811 | 0.270259 | 0.000335 | hypermethylated |
| cg22918700 | 0.65818 | 0.793749189 | 0.270201 | 0.000152 | hypermethylated |
| cg26804891 | 0.66006 | 0.795956216 | 0.270092 | 0.000733 | hypermethylated |
| cg12666874 | 0.67711 | 0.816509189 | 0.270079 | 0.003506 | hypermethylated |
| cg21408624 | 0.67934 | 0.819121622 | 0.269944 | 0.000506 | hypermethylated |
| cg09399801 | 0.70515 | 0.850171351 | 0.269823 | 0.016835 | hypermethylated |
| cg08888487 | 0.67031 | 0.808108649 | 0.269721 | 0.001288 | hypermethylated |
| cg05380759 | 0.57111 | 0.688504324 | 0.269697 | 0.0003   | hypermethylated |
| cg05265884 | 0.58763 | 0.708385405 | 0.269626 | 0.000688 | hypermethylated |
| cg09823576 | 0.68368 | 0.824162162 | 0.269607 | 0.007799 | hypermethylated |
| cg13149442 | 0.71152 | 0.857631351 | 0.269453 | 0.01021  | hypermethylated |
| cg00382227 | 0.71988 | 0.867692432 | 0.269427 | 0.002189 | hypermethylated |
| cg22519702 | 0.7326  | 0.883008649 | 0.269402 | 0.030759 | hypermethylated |
| cg23740135 | 0.60428 | 0.728335676 | 0.269386 | 0.001803 | hypermethylated |
| cg03924483 | 0.52817 | 0.636594054 | 0.269371 | 0.020119 | hypermethylated |
| cg08313393 | 0.62437 | 0.752528108 | 0.269344 | 0.032586 | hypermethylated |
| cg14614094 | 0.57379 | 0.691411892 | 0.269023 | 7.84E-05 | hypermethylated |
| cg09263875 | 0.61162 | 0.736984324 | 0.268998 | 0.002455 | hypermethylated |
| cg02036494 | 0.59135 | 0.712508108 | 0.268894 | 0.020586 | hypermethylated |
| cg14038009 | 0.58386 | 0.703419459 | 0.268763 | 0.000789 | hypermethylated |
| cg15600176 | 0.62604 | 0.754222703 | 0.268736 | 0.002478 | hypermethylated |
| cg05257275 | 0.6426  | 0.77417027  | 0.26873  | 0.007158 | hypermethylated |

|            |         |             |          |          |                 |
|------------|---------|-------------|----------|----------|-----------------|
| cg14975238 | 0.59883 | 0.721371892 | 0.268597 | 0.022212 | hypermethylated |
| cg12013685 | 0.54102 | 0.651691351 | 0.268507 | 0.003506 | hypermethylated |
| cg08351085 | 0.69506 | 0.837093514 | 0.268251 | 0.01073  | hypermethylated |
| cg27080348 | 0.70239 | 0.845869189 | 0.268162 | 0.008208 | hypermethylated |
| cg22245862 | 0.55274 | 0.665646486 | 0.268155 | 0.001    | hypermethylated |
| cg01367097 | 0.69482 | 0.836727027 | 0.268118 | 0.001912 | hypermethylated |
| cg01069808 | 0.71516 | 0.861126486 | 0.267959 | 0.001684 | hypermethylated |
| cg00305996 | 0.68038 | 0.81919027  | 0.267858 | 0.02238  | hypermethylated |
| cg04718883 | 0.75238 | 0.905442162 | 0.267161 | 0.00193  | hypermethylated |
| cg06107104 | 0.56126 | 0.675344865 | 0.266955 | 0.048145 | hypermethylated |
| cg24370974 | 0.68567 | 0.824989189 | 0.266861 | 0.004172 | hypermethylated |
| cg07766743 | 0.64021 | 0.770255135 | 0.266791 | 0.001839 | hypermethylated |
| cg20277356 | 0.72127 | 0.867742703 | 0.266728 | 0.00032  | hypermethylated |
| cg14297867 | 0.73216 | 0.880645405 | 0.266402 | 0.001188 | hypermethylated |
| cg10805220 | 0.46062 | 0.55402     | 0.266361 | 0.00043  | hypermethylated |
| cg00709112 | 0.7063  | 0.849494054 | 0.266323 | 0.012233 | hypermethylated |
| cg03075050 | 0.50804 | 0.610905405 | 0.266007 | 6.01E-05 | hypermethylated |
| cg07238439 | 0.5874  | 0.706308649 | 0.265955 | 0.007667 | hypermethylated |
| cg26661718 | 0.59199 | 0.711821081 | 0.265942 | 0.004906 | hypermethylated |
| cg02392025 | 0.68976 | 0.829327027 | 0.265847 | 0.013159 | hypermethylated |
| cg21165137 | 0.71283 | 0.857048108 | 0.265818 | 0.013265 | hypermethylated |
| cg00767886 | 0.69449 | 0.834943784 | 0.265725 | 0.001768 | hypermethylated |
| cg15428835 | 0.62482 | 0.751096216 | 0.265557 | 0.001423 | hypermethylated |
| cg08705483 | 0.58485 | 0.702960541 | 0.265377 | 0.013699 | hypermethylated |
| cg11030420 | 0.7149  | 0.859260541 | 0.265354 | 3.85E-05 | hypermethylated |
| cg14904079 | 0.75349 | 0.905526486 | 0.265168 | 0.005039 | hypermethylated |
| cg16307965 | 0.69979 | 0.840951892 | 0.265101 | 0.000187 | hypermethylated |
| cg01255486 | 0.72525 | 0.871536216 | 0.265082 | 0.007345 | hypermethylated |
| cg12531838 | 0.71589 | 0.86012973  | 0.264816 | 0.001839 | hypermethylated |
| cg05490233 | 0.65541 | 0.787455135 | 0.2648   | 0.000789 | hypermethylated |
| cg11776930 | 0.60623 | 0.728159459 | 0.264389 | 0.016835 | hypermethylated |
| cg10314760 | 0.71943 | 0.864087027 | 0.264322 | 0.001096 | hypermethylated |
| cg22624278 | 0.55409 | 0.665414595 | 0.264133 | 0.001839 | hypermethylated |
| cg22795216 | 0.79725 | 0.957287027 | 0.263919 | 0.001618 | hypermethylated |
| cg21296675 | 0.46504 | 0.558375135 | 0.26388  | 0.00012  | hypermethylated |
| cg12589486 | 0.74643 | 0.895952432 | 0.263415 | 0.000399 | hypermethylated |
| cg17924366 | 0.58141 | 0.697788649 | 0.263234 | 0.012233 | hypermethylated |
| cg01093311 | 0.70682 | 0.848239459 | 0.263129 | 5.31E-05 | hypermethylated |
| cg09034646 | 0.66273 | 0.795257297 | 0.263    | 0.024674 | hypermethylated |
| cg06170425 | 0.73918 | 0.886912432 | 0.262866 | 0.000306 | hypermethylated |
| cg09833545 | 0.66997 | 0.803756757 | 0.262662 | 0.008783 | hypermethylated |
| cg04195548 | 0.66615 | 0.799072973 | 0.26248  | 0.002856 | hypermethylated |
| cg02914667 | 0.69881 | 0.838234054 | 0.262453 | 0.01392  | hypermethylated |
| cg04525408 | 0.58125 | 0.696971892 | 0.261942 | 0.018918 | hypermethylated |
| cg06597095 | 0.71823 | 0.861162703 | 0.26184  | 0.001821 | hypermethylated |
| cg10522818 | 0.48721 | 0.584114595 | 0.261708 | 0.000134 | hypermethylated |
| cg06529761 | 0.56018 | 0.671595676 | 0.261702 | 0.001619 | hypermethylated |
| cg23117727 | 0.66387 | 0.795781081 | 0.261471 | 0.005606 | hypermethylated |
| cg03574652 | 0.62519 | 0.749395135 | 0.261432 | 0.000588 | hypermethylated |
| cg03552025 | 0.56715 | 0.679602162 | 0.26096  | 0.02542  | hypermethylated |
| cg08569517 | 0.66382 | 0.795396757 | 0.260883 | 0.000324 | hypermethylated |
| cg03337430 | 0.74817 | 0.896221081 | 0.260489 | 0.005039 | hypermethylated |
| cg11075176 | 0.74873 | 0.896833514 | 0.260395 | 0.014145 | hypermethylated |
| cg10633051 | 0.64722 | 0.775194054 | 0.260301 | 0.002409 | hypermethylated |
| cg26951614 | 0.72404 | 0.867141081 | 0.260197 | 0.000464 | hypermethylated |
| cg13728069 | 0.75234 | 0.901024324 | 0.260181 | 0.01146  | hypermethylated |
| cg04303439 | 0.65509 | 0.784506486 | 0.260092 | 0.008932 | hypermethylated |
| cg15067606 | 0.6784  | 0.812318378 | 0.259909 | 0.000378 | hypermethylated |

|            |         |             |          |          |                 |
|------------|---------|-------------|----------|----------|-----------------|
| cg23640615 | 0.70708 | 0.846496757 | 0.259631 | 0.023769 | hypermethylated |
| cg02519879 | 0.61224 | 0.732838378 | 0.259398 | 0.03212  | hypermethylated |
| cg01410314 | 0.66119 | 0.791379459 | 0.259305 | 0.039172 | hypermethylated |
| cg02412684 | 0.68206 | 0.81625027  | 0.259113 | 0.004526 | hypermethylated |
| cg27428744 | 0.74281 | 0.888797838 | 0.258862 | 0.006451 | hypermethylated |
| cg01663563 | 0.65983 | 0.789395135 | 0.258653 | 0.003316 | hypermethylated |
| cg14091372 | 0.61457 | 0.735228108 | 0.258615 | 0.000551 | hypermethylated |
| cg17463655 | 0.62446 | 0.746971351 | 0.258444 | 0.010126 | hypermethylated |
| cg23029851 | 0.58957 | 0.705109189 | 0.258184 | 0.034015 | hypermethylated |
| cg12641165 | 0.67274 | 0.804576216 | 0.25818  | 0.006621 | hypermethylated |
| cg25007447 | 0.6885  | 0.823213514 | 0.25781  | 0.001423 | hypermethylated |
| cg24818418 | 0.68593 | 0.820124865 | 0.257782 | 0.021062 | hypermethylated |
| cg09514524 | 0.74196 | 0.887038919 | 0.257656 | 0.015931 | hypermethylated |
| cg11751213 | 0.64776 | 0.774383784 | 0.257589 | 0.001288 | hypermethylated |
| cg07381141 | 0.62406 | 0.746038378 | 0.257565 | 0.039172 | hypermethylated |
| cg15040499 | 0.73074 | 0.873560541 | 0.25755  | 0.01792  | hypermethylated |
| cg16437211 | 0.66749 | 0.797892973 | 0.257449 | 0.000251 | hypermethylated |
| cg13752649 | 0.64328 | 0.768886486 | 0.257324 | 0.007732 | hypermethylated |
| cg09286367 | 0.77499 | 0.926136757 | 0.257048 | 0.00015  | hypermethylated |
| cg24477315 | 0.60876 | 0.727470811 | 0.257016 | 0.003255 | hypermethylated |
| cg03191794 | 0.70256 | 0.839504865 | 0.256917 | 0.008419 | hypermethylated |
| cg23658709 | 0.73155 | 0.874034054 | 0.256733 | 0.029234 | hypermethylated |
| cg21486233 | 0.71777 | 0.85754973  | 0.256699 | 0.00504  | hypermethylated |
| cg04696969 | 0.73448 | 0.877471892 | 0.25663  | 6.86E-05 | hypermethylated |
| cg03190911 | 0.59312 | 0.708535135 | 0.256515 | 0.004734 | hypermethylated |
| cg01325188 | 0.62363 | 0.744846486 | 0.256253 | 0.004951 | hypermethylated |
| cg11115431 | 0.63823 | 0.762281622 | 0.256248 | 0.000287 | hypermethylated |
| cg25069596 | 0.63644 | 0.759840541 | 0.255672 | 0.009552 | hypermethylated |
| cg02276973 | 0.73726 | 0.880165946 | 0.255602 | 0.000378 | hypermethylated |
| cg16992627 | 0.64404 | 0.768744865 | 0.255355 | 0.000268 | hypermethylated |
| cg25383605 | 0.58004 | 0.692       | 0.25462  | 0.000374 | hypermethylated |
| cg10179300 | 0.63278 | 0.7549      | 0.254582 | 0.000875 | hypermethylated |
| cg14757661 | 0.69602 | 0.830344324 | 0.254581 | 0.016444 | hypermethylated |
| cg04281204 | 0.72871 | 0.869229189 | 0.254392 | 0.008783 | hypermethylated |
| cg23551917 | 0.53231 | 0.634936216 | 0.254345 | 0.003225 | hypermethylated |
| cg08549332 | 0.663   | 0.790736216 | 0.254188 | 0.000511 | hypermethylated |
| cg01693830 | 0.62536 | 0.745767027 | 0.254038 | 0.009315 | hypermethylated |
| cg17221945 | 0.73043 | 0.870948649 | 0.253842 | 0.012844 | hypermethylated |
| cg27638288 | 0.71619 | 0.853942703 | 0.253797 | 0.000789 | hypermethylated |
| cg20649716 | 0.46865 | 0.558784865 | 0.253782 | 0.000511 | hypermethylated |
| cg07011231 | 0.72025 | 0.858720541 | 0.253691 | 0.000256 | hypermethylated |
| cg25946538 | 0.56292 | 0.67108973  | 0.253576 | 0.004287 | hypermethylated |
| cg10193069 | 0.72296 | 0.861838378 | 0.253502 | 0.019511 | hypermethylated |
| cg25575937 | 0.679   | 0.809402703 | 0.253446 | 0.026575 | hypermethylated |
| cg12347480 | 0.74542 | 0.888530811 | 0.253368 | 0.001619 | hypermethylated |
| cg06449094 | 0.6776  | 0.807527568 | 0.253078 | 0.000741 | hypermethylated |
| cg01280182 | 0.60857 | 0.725131892 | 0.25282  | 0.000219 | hypermethylated |
| cg09357140 | 0.72496 | 0.863723243 | 0.252668 | 0.026575 | hypermethylated |
| cg14552982 | 0.63741 | 0.759254054 | 0.252361 | 0.003637 | hypermethylated |
| cg19983948 | 0.66347 | 0.790167027 | 0.252126 | 0.011745 | hypermethylated |
| cg05328670 | 0.68811 | 0.819437297 | 0.251994 | 0.005316 | hypermethylated |
| cg12465501 | 0.70925 | 0.844581622 | 0.251943 | 0.001496 | hypermethylated |
| cg24408200 | 0.64424 | 0.767162703 | 0.251934 | 0.002386 | hypermethylated |
| cg16472542 | 0.7169  | 0.853636216 | 0.251849 | 0.001063 | hypermethylated |
| cg01110440 | 0.69096 | 0.822736757 | 0.251829 | 0.002599 | hypermethylated |
| cg24046689 | 0.803   | 0.956019459 | 0.25164  | 0.000147 | hypermethylated |
| cg01962750 | 0.65119 | 0.775279459 | 0.251638 | 4.42E-05 | hypermethylated |
| cg07362258 | 0.72738 | 0.865844324 | 0.251398 | 0.000741 | hypermethylated |

|            |         |             |          |          |                 |
|------------|---------|-------------|----------|----------|-----------------|
| cg08947167 | 0.63792 | 0.759244324 | 0.251189 | 0.000365 | hypermethylated |
| cg18348494 | 0.65165 | 0.775576757 | 0.251172 | 0.009552 | hypermethylated |
| cg08722638 | 0.7449  | 0.886554595 | 0.251163 | 0.003136 | hypermethylated |
| cg09467345 | 0.64951 | 0.772964324 | 0.25105  | 0.008069 | hypermethylated |
| cg09310065 | 0.65659 | 0.781289189 | 0.250864 | 0.001225 | hypermethylated |
| cg21049487 | 0.71748 | 0.853687568 | 0.25077  | 0.001395 | hypermethylated |
| cg26997966 | 0.72418 | 0.861535676 | 0.250562 | 9.31E-06 | hypermethylated |
| cg02703822 | 0.77656 | 0.923845405 | 0.250554 | 0.002408 | hypermethylated |
| cg05966235 | 0.74532 | 0.886581622 | 0.250393 | 0.000581 | hypermethylated |
| cg02287325 | 0.66135 | 0.786665946 | 0.250337 | 0.003604 | hypermethylated |
| cg08433095 | 0.68171 | 0.810874595 | 0.250321 | 0.012434 | hypermethylated |
| cg17827208 | 0.56091 | 0.667168108 | 0.250281 | 0.000335 | hypermethylated |
| cg11361442 | 0.71454 | 0.849794595 | 0.250099 | 0.011938 | hypermethylated |
| cg18501647 | 0.57872 | 0.688145946 | 0.249849 | 7.03E-05 | hypermethylated |
| cg16218477 | 0.68245 | 0.811471892 | 0.249818 | 0.006122 | hypermethylated |
| cg06535102 | 0.73939 | 0.879154054 | 0.24978  | 0.003505 | hypermethylated |
| cg05475485 | 0.70146 | 0.834015676 | 0.249714 | 0.015685 | hypermethylated |
| cg19543317 | 0.62741 | 0.74597027  | 0.24971  | 4.64E-05 | hypermethylated |
| cg25411239 | 0.71581 | 0.851008649 | 0.249597 | 0.002231 | hypermethylated |
| cg13914024 | 0.6823  | 0.811151351 | 0.249565 | 0.008783 | hypermethylated |
| cg23476802 | 0.601   | 0.714358378 | 0.249283 | 0.010211 | hypermethylated |
| cg13859860 | 0.64228 | 0.76341027  | 0.249256 | 0.020902 | hypermethylated |
| cg10478035 | 0.70416 | 0.836944324 | 0.249228 | 1.75E-05 | hypermethylated |
| cg07710971 | 0.76761 | 0.912281081 | 0.249105 | 0.00101  | hypermethylated |
| cg26389281 | 0.63139 | 0.750282162 | 0.248902 | 0.002066 | hypermethylated |
| cg06528737 | 0.69614 | 0.827091351 | 0.248669 | 0.006175 | hypermethylated |
| cg22188918 | 0.57138 | 0.678792432 | 0.24852  | 0.000168 | hypermethylated |
| cg07148651 | 0.73756 | 0.876164865 | 0.248442 | 0.002803 | hypermethylated |
| cg15271026 | 0.71341 | 0.847458378 | 0.248411 | 0.002318 | hypermethylated |
| cg02976898 | 0.73331 | 0.871058378 | 0.248346 | 0.016573 | hypermethylated |
| cg20333001 | 0.72122 | 0.8563      | 0.247677 | 0.016704 | hypermethylated |
| cg23216434 | 0.72858 | 0.864984865 | 0.247587 | 0.003843 | hypermethylated |
| cg08963581 | 0.73709 | 0.874952432 | 0.247364 | 5.00E-05 | hypermethylated |
| cg12165223 | 0.68335 | 0.811137297 | 0.247321 | 0.029449 | hypermethylated |
| cg24368408 | 0.74553 | 0.884735135 | 0.246979 | 0.001541 | hypermethylated |
| cg21915998 | 0.73282 | 0.869411892 | 0.246581 | 0.001556 | hypermethylated |
| cg25096740 | 0.66931 | 0.793914054 | 0.246308 | 0.005508 | hypermethylated |
| cg16733813 | 0.59385 | 0.704397297 | 0.246291 | 0.001395 | hypermethylated |
| cg11300341 | 0.69958 | 0.829786486 | 0.246251 | 0.009084 | hypermethylated |
| cg04270085 | 0.70837 | 0.840173514 | 0.246184 | 3.67E-05 | hypermethylated |
| cg20696432 | 0.57473 | 0.681664324 | 0.246177 | 0.006975 | hypermethylated |
| cg27097660 | 0.6156  | 0.730054595 | 0.246011 | 0.019661 | hypermethylated |
| cg27230984 | 0.56358 | 0.668354595 | 0.245993 | 0.004649 | hypermethylated |
| cg25219728 | 0.74916 | 0.888427568 | 0.24598  | 0.001    | hypermethylated |
| cg14571493 | 0.71292 | 0.845448108 | 0.245976 | 0.034014 | hypermethylated |
| cg00163006 | 0.66435 | 0.787624324 | 0.245564 | 0.001968 | hypermethylated |
| cg07584981 | 0.63842 | 0.756616757 | 0.245057 | 0.011554 | hypermethylated |
| cg24782949 | 0.7355  | 0.871500541 | 0.244776 | 0.041413 | hypermethylated |
| cg04539957 | 0.56691 | 0.671667027 | 0.244626 | 0.000166 | hypermethylated |
| cg02478836 | 0.61006 | 0.722580541 | 0.244207 | 0.012948 | hypermethylated |
| cg13597544 | 0.63792 | 0.755507027 | 0.24407  | 0.00039  | hypermethylated |
| cg02927058 | 0.74423 | 0.881296216 | 0.243878 | 0.007282 | hypermethylated |
| cg18774692 | 0.63672 | 0.753865405 | 0.243648 | 0.001381 | hypermethylated |
| cg08511818 | 0.67829 | 0.802898919 | 0.243316 | 0.001153 | hypermethylated |
| cg07326665 | 0.7362  | 0.87127027  | 0.243023 | 0.014488 | hypermethylated |
| cg15973818 | 0.65271 | 0.772328108 | 0.242772 | 0.010126 | hypermethylated |
| cg00733001 | 0.74103 | 0.876821622 | 0.242751 | 0.000378 | hypermethylated |
| cg00783000 | 0.66436 | 0.786089189 | 0.242728 | 0.006796 | hypermethylated |

|            |         |             |          |          |                 |
|------------|---------|-------------|----------|----------|-----------------|
| cg01869554 | 0.67694 | 0.800940541 | 0.242667 | 0.010909 | hypermethylated |
| cg05471509 | 0.74964 | 0.886848649 | 0.24249  | 0.001452 | hypermethylated |
| cg06023295 | 0.55913 | 0.661449189 | 0.242447 | 0.000306 | hypermethylated |
| cg23679332 | 0.71189 | 0.842104324 | 0.242345 | 0.015317 | hypermethylated |
| cg26624744 | 0.68637 | 0.811909189 | 0.242332 | 0.007035 | hypermethylated |
| cg23246769 | 0.75189 | 0.889398378 | 0.242308 | 0.01146  | hypermethylated |
| cg06625077 | 0.6724  | 0.795275676 | 0.242135 | 0.006621 | hypermethylated |
| cg10639428 | 0.55002 | 0.650421622 | 0.241891 | 0.007158 | hypermethylated |
| cg09441069 | 0.72204 | 0.853685946 | 0.241627 | 0.005411 | hypermethylated |
| cg13496660 | 0.77157 | 0.912198378 | 0.241551 | 0.001838 | hypermethylated |
| cg09537792 | 0.74448 | 0.880033514 | 0.241325 | 0.004287 | hypermethylated |
| cg22959054 | 0.64256 | 0.759511892 | 0.241241 | 0.000265 | hypermethylated |
| cg23563866 | 0.67261 | 0.795011351 | 0.241205 | 0.036003 | hypermethylated |
| cg11081251 | 0.64224 | 0.759087568 | 0.241154 | 0.001768 | hypermethylated |
| cg23303685 | 0.78404 | 0.926591892 | 0.241007 | 0.026969 | hypermethylated |
| cg18988856 | 0.7473  | 0.883113514 | 0.240911 | 0.020273 | hypermethylated |
| cg26090619 | 0.5276  | 0.62342973  | 0.240782 | 0.000268 | hypermethylated |
| cg05729352 | 0.65597 | 0.775086486 | 0.240727 | 0.000839 | hypermethylated |
| cg25241823 | 0.62916 | 0.743204324 | 0.240332 | 0.001381 | hypermethylated |
| cg05012672 | 0.79204 | 0.935607568 | 0.24033  | 0.001423 | hypermethylated |
| cg07271473 | 0.69786 | 0.824334595 | 0.240292 | 0.004248 | hypermethylated |
| cg21597025 | 0.70089 | 0.827842162 | 0.240168 | 0.000674 | hypermethylated |
| cg03885098 | 0.79607 | 0.940222162 | 0.240106 | 0.000626 | hypermethylated |
| cg20617977 | 0.67518 | 0.797436757 | 0.240098 | 6.46E-05 | hypermethylated |
| cg00022235 | 0.68967 | 0.814347568 | 0.239738 | 0.01021  | hypermethylated |
| cg27279583 | 0.65801 | 0.776951351 | 0.239715 | 0.015196 | hypermethylated |
| cg11067712 | 0.76165 | 0.899260541 | 0.239611 | 0.025232 | hypermethylated |
| cg03261948 | 0.67071 | 0.791885946 | 0.239604 | 0.000256 | hypermethylated |
| cg07618581 | 0.62204 | 0.734390811 | 0.239541 | 0.006679 | hypermethylated |
| cg06567920 | 0.63516 | 0.749863784 | 0.239508 | 0.000575 | hypermethylated |
| cg09850764 | 0.75132 | 0.886942162 | 0.239413 | 0.000756 | hypermethylated |
| cg16308533 | 0.75646 | 0.892995135 | 0.239389 | 0.000224 | hypermethylated |
| cg14472390 | 0.60971 | 0.719754595 | 0.239382 | 0.00546  | hypermethylated |
| cg05038288 | 0.60903 | 0.718935135 | 0.239348 | 0.001667 | hypermethylated |
| cg07906527 | 0.70192 | 0.828471892 | 0.239146 | 0.001541 | hypermethylated |
| cg04860563 | 0.71838 | 0.847777297 | 0.238938 | 0.00012  | hypermethylated |
| cg25225155 | 0.69506 | 0.820224324 | 0.238881 | 0.000681 | hypermethylated |
| cg17902007 | 0.82205 | 0.969992973 | 0.238748 | 0.001602 | hypermethylated |
| cg23508264 | 0.7928  | 0.935464865 | 0.238727 | 0.000725 | hypermethylated |
| cg15080870 | 0.77239 | 0.911365405 | 0.2387   | 0.001667 | hypermethylated |
| cg18060030 | 0.71727 | 0.846287568 | 0.238632 | 0.001381 | hypermethylated |
| cg19018435 | 0.67663 | 0.798209189 | 0.2384   | 0.003078 | hypermethylated |
| cg11423909 | 0.74974 | 0.884329189 | 0.238193 | 0.001188 | hypermethylated |
| cg05140624 | 0.62347 | 0.73503027  | 0.237484 | 0.000358 | hypermethylated |
| cg10319073 | 0.68249 | 0.804535135 | 0.237348 | 0.000594 | hypermethylated |
| cg14146657 | 0.69282 | 0.816523784 | 0.237014 | 0.034014 | hypermethylated |
| cg09562563 | 0.75977 | 0.895372973 | 0.236926 | 0.003473 | hypermethylated |
| cg14709826 | 0.6808  | 0.802237838 | 0.236799 | 0.002363 | hypermethylated |
| cg26921533 | 0.66451 | 0.782813514 | 0.236378 | 0.002189 | hypermethylated |
| cg05554151 | 0.76826 | 0.904984324 | 0.236298 | 0.005085 | hypermethylated |
| cg07314409 | 0.68769 | 0.809924324 | 0.236029 | 0.00099  | hypermethylated |
| cg00330953 | 0.58322 | 0.686876757 | 0.236011 | 0.001893 | hypermethylated |
| cg22399111 | 0.72151 | 0.84968     | 0.2359   | 0.001368 | hypermethylated |
| cg22457637 | 0.65613 | 0.772661622 | 0.235855 | 0.039723 | hypermethylated |
| cg11544647 | 0.47007 | 0.553462162 | 0.235609 | 0.006068 | hypermethylated |
| cg19871722 | 0.69855 | 0.822405946 | 0.235487 | 0.005364 | hypermethylated |
| cg16720807 | 0.70583 | 0.830878378 | 0.235317 | 0.008208 | hypermethylated |
| cg07605229 | 0.7572  | 0.891291892 | 0.235224 | 0.009315 | hypermethylated |

|            |         |             |          |          |                 |
|------------|---------|-------------|----------|----------|-----------------|
| cg15488143 | 0.68857 | 0.810453514 | 0.235126 | 0.00071  | hypermethylated |
| cg10164795 | 0.72313 | 0.851059459 | 0.235005 | 0.002455 | hypermethylated |
| cg01526355 | 0.6192  | 0.728694054 | 0.234908 | 0.000674 | hypermethylated |
| cg18487598 | 0.71348 | 0.839615135 | 0.234855 | 0.000588 | hypermethylated |
| cg27284034 | 0.68458 | 0.805434054 | 0.234547 | 0.002106 | hypermethylated |
| cg10909506 | 0.74141 | 0.872277838 | 0.234516 | 0.011649 | hypermethylated |
| cg09499844 | 0.81192 | 0.955216216 | 0.23449  | 0.002525 | hypermethylated |
| cg26988853 | 0.69248 | 0.814686486 | 0.234473 | 0.001635 | hypermethylated |
| cg04012282 | 0.63396 | 0.745793514 | 0.234384 | 8.03E-05 | hypermethylated |
| cg15684162 | 0.7731  | 0.909443784 | 0.234329 | 0.000221 | hypermethylated |
| cg05324407 | 0.62164 | 0.731198919 | 0.234185 | 0.000117 | hypermethylated |
| cg18450832 | 0.73764 | 0.867592432 | 0.234101 | 0.000469 | hypermethylated |
| cg20773956 | 0.74962 | 0.881534595 | 0.233858 | 0.00096  | hypermethylated |
| cg01291590 | 0.60296 | 0.709038919 | 0.233803 | 0.000575 | hypermethylated |
| cg18066946 | 0.73784 | 0.867602703 | 0.233727 | 0.002318 | hypermethylated |
| cg22479226 | 0.60332 | 0.709402162 | 0.23368  | 5.06E-05 | hypermethylated |
| cg19280364 | 0.6693  | 0.786882162 | 0.233495 | 0.007866 | hypermethylated |
| cg06330593 | 0.71929 | 0.845645405 | 0.233479 | 0.005222 | hypermethylated |
| cg20441606 | 0.76335 | 0.897424324 | 0.233446 | 0.001571 | hypermethylated |
| cg04704085 | 0.80446 | 0.945701081 | 0.233364 | 0.001063 | hypermethylated |
| cg22815766 | 0.61571 | 0.723811351 | 0.233363 | 0.000931 | hypermethylated |
| cg18065874 | 0.71986 | 0.846097297 | 0.233107 | 0.000426 | hypermethylated |
| cg05883442 | 0.54393 | 0.639304324 | 0.233082 | 0.009238 | hypermethylated |
| cg02209075 | 0.76042 | 0.893724324 | 0.233033 | 0.000253 | hypermethylated |
| cg08423575 | 0.65382 | 0.768432432 | 0.233025 | 0.015317 | hypermethylated |
| cg24902995 | 0.81836 | 0.961711351 | 0.232868 | 8.52E-05 | hypermethylated |
| cg20302957 | 0.6892  | 0.809895135 | 0.232812 | 0.008783 | hypermethylated |
| cg21129181 | 0.59232 | 0.696027027 | 0.232767 | 0.001096 | hypermethylated |
| cg26649504 | 0.72568 | 0.852711892 | 0.232725 | 0.001153 | hypermethylated |
| cg24176760 | 0.73706 | 0.865943784 | 0.232491 | 0.010909 | hypermethylated |
| cg17367596 | 0.65661 | 0.771363243 | 0.232374 | 0.019065 | hypermethylated |
| cg09491542 | 0.71824 | 0.843754595 | 0.232357 | 0.000135 | hypermethylated |
| cg23916284 | 0.69691 | 0.818661622 | 0.232295 | 0.002725 | hypermethylated |
| cg10533159 | 0.75044 | 0.881402703 | 0.232065 | 0.043763 | hypermethylated |
| cg19701264 | 0.48613 | 0.570891351 | 0.231874 | 0.006796 | hypermethylated |
| cg06389888 | 0.68152 | 0.800306486 | 0.231797 | 0.010554 | hypermethylated |
| cg01831743 | 0.62414 | 0.732847027 | 0.231642 | 0.005131 | hypermethylated |
| cg06579738 | 0.70958 | 0.833123784 | 0.231566 | 0.000207 | hypermethylated |
| cg06528626 | 0.72058 | 0.846005405 | 0.231508 | 0.000667 | hypermethylated |
| cg23332586 | 0.71061 | 0.83427027  | 0.231457 | 0.005963 | hypermethylated |
| cg24815973 | 0.72864 | 0.855425946 | 0.231437 | 0.000335 | hypermethylated |
| cg18963171 | 0.68773 | 0.807246486 | 0.231167 | 0.01109  | hypermethylated |
| cg08217589 | 0.68088 | 0.799174054 | 0.231109 | 0.010819 | hypermethylated |
| cg19125584 | 0.64051 | 0.751602703 | 0.230749 | 0.001734 | hypermethylated |
| cg25751484 | 0.71879 | 0.843304865 | 0.230484 | 0.00035  | hypermethylated |
| cg02307288 | 0.61618 | 0.722887568 | 0.230419 | 0.000696 | hypermethylated |
| cg12141056 | 0.66795 | 0.783467027 | 0.230132 | 0.005316 | hypermethylated |
| cg03187713 | 0.75425 | 0.884572973 | 0.229938 | 0.006679 | hypermethylated |
| cg02451691 | 0.72835 | 0.854145405 | 0.22985  | 0.004134 | hypermethylated |
| cg12027899 | 0.64306 | 0.754065946 | 0.229737 | 0.003773 | hypermethylated |
| cg04159077 | 0.69839 | 0.818823784 | 0.22952  | 0.00504  | hypermethylated |
| cg05027554 | 0.72975 | 0.855577838 | 0.229497 | 0.000374 | hypermethylated |
| cg10613332 | 0.69591 | 0.815648108 | 0.229046 | 0.001839 | hypermethylated |
| cg05335030 | 0.80527 | 0.943114054 | 0.22796  | 0.00029  | hypermethylated |
| cg22460443 | 0.7097  | 0.831152432 | 0.227904 | 0.014956 | hypermethylated |
| cg05314639 | 0.78605 | 0.920468108 | 0.227747 | 0.007219 | hypermethylated |
| cg00902417 | 0.61918 | 0.724844324 | 0.227312 | 9.72E-05 | hypermethylated |
| cg04634427 | 0.64178 | 0.751274595 | 0.227261 | 0.001541 | hypermethylated |

|            |         |             |          |          |                 |
|------------|---------|-------------|----------|----------|-----------------|
| cg05807722 | 0.7545  | 0.883095135 | 0.227048 | 0.01073  | hypermethylated |
| cg21300719 | 0.80113 | 0.937365405 | 0.226575 | 0.007999 | hypermethylated |
| cg08619515 | 0.59679 | 0.698243784 | 0.226507 | 0.004776 | hypermethylated |
| cg17141972 | 0.76919 | 0.899883243 | 0.226398 | 0.003195 | hypermethylated |
| cg13079837 | 0.66495 | 0.777918919 | 0.226374 | 0.02798  | hypermethylated |
| cg05655106 | 0.67437 | 0.788912432 | 0.226325 | 0.002751 | hypermethylated |
| cg15656769 | 0.62194 | 0.727483243 | 0.226139 | 0.001188 | hypermethylated |
| cg07505680 | 0.73165 | 0.855666486 | 0.225895 | 0.024491 | hypermethylated |
| cg14377152 | 0.65241 | 0.762896757 | 0.225709 | 0.00341  | hypermethylated |
| cg14600384 | 0.6448  | 0.753948649 | 0.225615 | 0.003316 | hypermethylated |
| cg02842158 | 0.71198 | 0.832463784 | 0.225551 | 0.003195 | hypermethylated |
| cg12031031 | 0.72223 | 0.84437027  | 0.225417 | 1.42E-05 | hypermethylated |
| cg25191725 | 0.71559 | 0.836583784 | 0.225377 | 0.010381 | hypermethylated |
| cg24414344 | 0.60317 | 0.704942703 | 0.224941 | 0.003078 | hypermethylated |
| cg02070077 | 0.75372 | 0.880787568 | 0.224765 | 0.000245 | hypermethylated |
| cg00344801 | 0.58288 | 0.681078378 | 0.224622 | 0.001949 | hypermethylated |
| cg23040011 | 0.73023 | 0.853220541 | 0.224568 | 0.005756 | hypermethylated |
| cg05260959 | 0.563   | 0.657818378 | 0.224554 | 0.000517 | hypermethylated |
| cg21250061 | 0.73758 | 0.861781081 | 0.224522 | 0.008348 | hypermethylated |
| cg18493314 | 0.70722 | 0.826169189 | 0.224278 | 0.002965 | hypermethylated |
| cg25555505 | 0.77218 | 0.901946486 | 0.224105 | 0.045597 | hypermethylated |
| cg17643662 | 0.63202 | 0.738051892 | 0.223752 | 0.007158 | hypermethylated |
| cg21966860 | 0.79963 | 0.933545405 | 0.223388 | 0.000224 | hypermethylated |
| cg24681438 | 0.67152 | 0.783744865 | 0.222954 | 0.01606  | hypermethylated |
| cg07291387 | 0.65098 | 0.759691351 | 0.2228   | 0.001619 | hypermethylated |
| cg24711397 | 0.61296 | 0.715116216 | 0.222385 | 0.012036 | hypermethylated |
| cg00376979 | 0.70164 | 0.81856973  | 0.222374 | 0.001262 | hypermethylated |
| cg00542638 | 0.67013 | 0.781774595 | 0.222312 | 0.01792  | hypermethylated |
| cg22617898 | 0.74676 | 0.871142703 | 0.222264 | 0.00044  | hypermethylated |
| cg23335916 | 0.67895 | 0.791929189 | 0.222066 | 0.000408 | hypermethylated |
| cg21768835 | 0.70188 | 0.818660541 | 0.222041 | 0.009713 | hypermethylated |
| cg02508204 | 0.66055 | 0.770302162 | 0.221757 | 0.003378 | hypermethylated |
| cg13092575 | 0.68777 | 0.802036757 | 0.221742 | 0.000551 | hypermethylated |
| cg21360079 | 0.69248 | 0.807463784 | 0.221625 | 0.006229 | hypermethylated |
| cg03422651 | 0.66673 | 0.777196216 | 0.221176 | 0.001    | hypermethylated |
| cg19076587 | 0.71246 | 0.830465946 | 0.221112 | 0.000528 | hypermethylated |
| cg18342866 | 0.67566 | 0.787515135 | 0.22101  | 0.014373 | hypermethylated |
| cg13369939 | 0.59776 | 0.696711351 | 0.220995 | 7.56E-05 | hypermethylated |
| cg27383651 | 0.69774 | 0.812954054 | 0.220484 | 0.007799 | hypermethylated |
| cg25544164 | 0.76102 | 0.886668649 | 0.220461 | 0.004444 | hypermethylated |
| cg06213317 | 0.64352 | 0.749612432 | 0.22016  | 0.003078 | hypermethylated |
| cg04030444 | 0.80421 | 0.93654     | 0.219768 | 0.020742 | hypermethylated |
| cg07169046 | 0.67966 | 0.791341081 | 0.219486 | 0.000464 | hypermethylated |
| cg18901940 | 0.77167 | 0.898367568 | 0.219322 | 0.00039  | hypermethylated |
| cg02394395 | 0.68606 | 0.798696757 | 0.219313 | 0.001301 | hypermethylated |
| cg07830644 | 0.75345 | 0.877132973 | 0.219284 | 0.00591  | hypermethylated |
| cg19003412 | 0.70869 | 0.824961622 | 0.219172 | 0.006451 | hypermethylated |
| cg07356488 | 0.71041 | 0.826828108 | 0.218936 | 0.002046 | hypermethylated |
| cg23848152 | 0.70622 | 0.821904324 | 0.218853 | 0.000116 | hypermethylated |
| cg24709001 | 0.80938 | 0.941802162 | 0.218607 | 0.001164 | hypermethylated |
| cg18404513 | 0.71156 | 0.827687027 | 0.2181   | 0.000271 | hypermethylated |
| cg00283857 | 0.71065 | 0.82652     | 0.217911 | 0.001237 | hypermethylated |
| cg18316735 | 0.74244 | 0.863480541 | 0.217889 | 0.000613 | hypermethylated |
| cg01498700 | 0.65057 | 0.756618919 | 0.217863 | 0.00504  | hypermethylated |
| cg08920252 | 0.78762 | 0.916008649 | 0.217861 | 8.84E-05 | hypermethylated |
| cg06999084 | 0.72966 | 0.848494595 | 0.217681 | 0.020902 | hypermethylated |
| cg08561825 | 0.78376 | 0.911271351 | 0.217469 | 0.015684 | hypermethylated |
| cg06120492 | 0.72459 | 0.8424      | 0.217341 | 0.0006   | hypermethylated |

|            |         |             |          |          |                 |
|------------|---------|-------------|----------|----------|-----------------|
| cg08709276 | 0.73906 | 0.859020541 | 0.217001 | 0.001839 | hypermethylated |
| cg05753046 | 0.75948 | 0.882709189 | 0.216926 | 0.000875 | hypermethylated |
| cg06891164 | 0.74279 | 0.863275676 | 0.216867 | 0.000145 | hypermethylated |
| cg01826337 | 0.65892 | 0.765758919 | 0.216787 | 0.025045 | hypermethylated |
| cg20062116 | 0.64789 | 0.752755135 | 0.216432 | 0.007408 | hypermethylated |
| cg01820007 | 0.72659 | 0.844039459 | 0.216169 | 0.016835 | hypermethylated |
| cg07106737 | 0.70761 | 0.821957838 | 0.21611  | 0.000805 | hypermethylated |
| cg03762760 | 0.791   | 0.918617838 | 0.215787 | 0.000417 | hypermethylated |
| cg05185038 | 0.71963 | 0.83573027  | 0.215782 | 0.006679 | hypermethylated |
| cg27127645 | 0.77173 | 0.896198919 | 0.215723 | 0.012637 | hypermethylated |
| cg12480375 | 0.72933 | 0.846843784 | 0.215524 | 0.006737 | hypermethylated |
| cg07560587 | 0.76834 | 0.891952973 | 0.215223 | 0.002147 | hypermethylated |
| cg25139636 | 0.69648 | 0.808437838 | 0.215055 | 8.22E-05 | hypermethylated |
| cg07673807 | 0.68825 | 0.798865946 | 0.215021 | 0.000178 | hypermethylated |
| cg05106231 | 0.78138 | 0.906906486 | 0.214929 | 0.009472 | hypermethylated |
| cg02550218 | 0.74041 | 0.859223243 | 0.214709 | 0.036003 | hypermethylated |
| cg08404546 | 0.71093 | 0.824899459 | 0.214511 | 0.000408 | hypermethylated |
| cg08481873 | 0.78567 | 0.911558378 | 0.214412 | 0.018772 | hypermethylated |
| cg09684066 | 0.68209 | 0.791336216 | 0.214329 | 0.001667 | hypermethylated |
| cg05081395 | 0.74661 | 0.866146486 | 0.214256 | 0.00291  | hypermethylated |
| cg00852414 | 0.73286 | 0.850094054 | 0.214085 | 0.005411 | hypermethylated |
| cg10663408 | 0.80029 | 0.9281      | 0.213757 | 0.014486 | hypermethylated |
| cg22925751 | 0.67011 | 0.777030811 | 0.213574 | 0.000219 | hypermethylated |
| cg13837335 | 0.71449 | 0.828388108 | 0.213393 | 0.003195 | hypermethylated |
| cg22615203 | 0.73842 | 0.856088108 | 0.213318 | 0.033772 | hypermethylated |
| cg26822782 | 0.69511 | 0.805770811 | 0.213128 | 0.017643 | hypermethylated |
| cg09318162 | 0.68702 | 0.796347568 | 0.213046 | 0.000306 | hypermethylated |
| cg01369895 | 0.69316 | 0.803430811 | 0.212985 | 0.003637 | hypermethylated |
| cg03385262 | 0.77929 | 0.903064865 | 0.212669 | 0.000613 | hypermethylated |
| cg14700684 | 0.60973 | 0.706536216 | 0.212593 | 0.000718 | hypermethylated |
| cg19600023 | 0.72857 | 0.844210811 | 0.212536 | 0.00028  | hypermethylated |
| cg26050906 | 0.66616 | 0.771892973 | 0.212532 | 0.001987 | hypermethylated |
| cg10017626 | 0.58785 | 0.681120541 | 0.212462 | 0.004022 | hypermethylated |
| cg18298050 | 0.65701 | 0.761175676 | 0.212314 | 0.010042 | hypermethylated |
| cg26839961 | 0.72686 | 0.841861622 | 0.211906 | 0.001141 | hypermethylated |
| cg23239647 | 0.63172 | 0.731631892 | 0.211833 | 0.00064  | hypermethylated |
| cg00324719 | 0.76267 | 0.883246486 | 0.211757 | 0.002432 | hypermethylated |
| cg03109914 | 0.7527  | 0.871681622 | 0.211726 | 0.02238  | hypermethylated |
| cg14153069 | 0.64158 | 0.742985946 | 0.211706 | 0.000104 | hypermethylated |
| cg07444414 | 0.71427 | 0.827136216 | 0.211655 | 0.00054  | hypermethylated |
| cg03233940 | 0.71898 | 0.832497838 | 0.211495 | 0.000875 | hypermethylated |
| cg13537240 | 0.63795 | 0.738422162 | 0.211002 | 0.002086 | hypermethylated |
| cg17415381 | 0.75201 | 0.870373514 | 0.210883 | 0.018772 | hypermethylated |
| cg08862830 | 0.69356 | 0.802682162 | 0.210808 | 0.004906 | hypermethylated |
| cg14014964 | 0.7596  | 0.878958919 | 0.210556 | 0.0017   | hypermethylated |
| cg17960934 | 0.69421 | 0.803231351 | 0.210443 | 0.003705 | hypermethylated |
| cg07740640 | 0.6845  | 0.791778378 | 0.210046 | 0.004445 | hypermethylated |
| cg02219383 | 0.75949 | 0.878330811 | 0.209733 | 0.00048  | hypermethylated |
| cg25363679 | 0.66879 | 0.773276216 | 0.209431 | 0.000234 | hypermethylated |
| cg13197551 | 0.68195 | 0.788488108 | 0.209423 | 0.000426 | hypermethylated |
| cg22177840 | 0.73748 | 0.852647027 | 0.209345 | 0.004022 | hypermethylated |
| cg26795540 | 0.63982 | 0.739587027 | 0.209054 | 0.000875 | hypermethylated |
| cg03413355 | 0.73275 | 0.846534054 | 0.208247 | 0.002965 | hypermethylated |
| cg02396253 | 0.73104 | 0.844353514 | 0.207897 | 0.000725 | hypermethylated |
| cg12578575 | 0.72887 | 0.841618378 | 0.207505 | 0.030537 | hypermethylated |
| cg04825814 | 0.77814 | 0.898457838 | 0.207421 | 0.008782 | hypermethylated |
| cg17011300 | 0.72316 | 0.834755676 | 0.207039 | 0.003843 | hypermethylated |
| cg16730509 | 0.75233 | 0.868357297 | 0.206923 | 0.007345 | hypermethylated |



|            |         |             |          |          |                 |
|------------|---------|-------------|----------|----------|-----------------|
| cg12085155 | 0.72403 | 0.835657297 | 0.206862 | 0.000756 | hypermethylated |
| cg21389119 | 0.71374 | 0.823542162 | 0.206444 | 0.000921 | hypermethylated |
| cg26917367 | 0.67463 | 0.778312432 | 0.206253 | 0.000126 | hypermethylated |
| cg07575466 | 0.80331 | 0.92657027  | 0.205944 | 1.77E-05 | hypermethylated |
| cg04127867 | 0.7718  | 0.889722162 | 0.205128 | 0.000875 | hypermethylated |
| cg02201132 | 0.70843 | 0.816534595 | 0.204889 | 0.026575 | hypermethylated |
| cg13613439 | 0.7368  | 0.848988649 | 0.204472 | 1.66E-05 | hypermethylated |
| cg10271819 | 0.61435 | 0.707661622 | 0.203999 | 0.000152 | hypermethylated |
| cg16424082 | 0.72937 | 0.840104324 | 0.203918 | 0.001481 | hypermethylated |
| cg13408597 | 0.7493  | 0.863005405 | 0.203826 | 0.020586 | hypermethylated |
| cg25447202 | 0.70449 | 0.81122     | 0.203514 | 0.001188 | hypermethylated |
| cg10888242 | 0.74728 | 0.860337297 | 0.203253 | 0.00151  | hypermethylated |
| cg13653963 | 0.69591 | 0.800732432 | 0.20242  | 0.002363 | hypermethylated |
| cg10696504 | 0.72635 | 0.835587568 | 0.202126 | 0.004776 | hypermethylated |
| cg26504274 | 0.76938 | 0.884828108 | 0.201701 | 0.021223 | hypermethylated |
| cg23460809 | 0.68263 | 0.784924324 | 0.20145  | 0.002026 | hypermethylated |
| cg05656566 | 0.6487  | 0.745810811 | 0.201258 | 0.000191 | hypermethylated |
| cg10205431 | 0.76851 | 0.883516757 | 0.201193 | 0.000653 | hypermethylated |
| cg16144331 | 0.59559 | 0.684697838 | 0.201148 | 0.003166 | hypermethylated |
| cg02377021 | 0.7479  | 0.859707568 | 0.201001 | 0.01109  | hypermethylated |
| cg00625351 | 0.69518 | 0.798924865 | 0.200673 | 0.00035  | hypermethylated |
| cg15810304 | 0.76062 | 0.873940541 | 0.200359 | 0.001857 | hypermethylated |
| cg11345811 | 0.70283 | 0.807437838 | 0.200175 | 0.009552 | hypermethylated |
| cg02747390 | 0.77958 | 0.895557838 | 0.20009  | 0.006121 | hypermethylated |
| cg20387304 | 0.74543 | 0.85631027  | 0.200061 | 0.001987 | hypermethylated |
| cg02596427 | 0.73383 | 0.842863784 | 0.199854 | 2.10E-05 | hypermethylated |
| cg11851382 | 0.72189 | 0.829071351 | 0.199717 | 0.000234 | hypermethylated |
| cg07873155 | 0.73762 | 0.846892432 | 0.199301 | 0.012036 | hypermethylated |
| cg16927416 | 0.65605 | 0.753004865 | 0.198853 | 0.001188 | hypermethylated |
| cg18547333 | 0.74571 | 0.855819459 | 0.198692 | 0.002106 | hypermethylated |
| cg21236414 | 0.78006 | 0.894851351 | 0.198063 | 0.00043  | hypermethylated |
| cg04340928 | 0.74799 | 0.857348108 | 0.196862 | 0.001987 | hypermethylated |
| cg26814650 | 0.74177 | 0.850183784 | 0.196803 | 0.020903 | hypermethylated |
| cg14125530 | 0.70682 | 0.810084324 | 0.196729 | 0.000342 | hypermethylated |
| cg08667600 | 0.74125 | 0.849008108 | 0.195818 | 0.014258 | hypermethylated |
| cg25718223 | 0.66613 | 0.762887027 | 0.195666 | 0.002026 | hypermethylated |
| cg08199563 | 0.71153 | 0.814873514 | 0.195652 | 0.004326 | hypermethylated |
| cg11816229 | 0.67723 | 0.775461081 | 0.195408 | 0.015317 | hypermethylated |
| cg15200412 | 0.7538  | 0.863079459 | 0.195312 | 0.001212 | hypermethylated |
| cg20392764 | 0.69799 | 0.799104865 | 0.195178 | 0.024309 | hypermethylated |
| cg27473355 | 0.63464 | 0.726505946 | 0.195036 | 0.004525 | hypermethylated |
| cg02215776 | 0.75928 | 0.868714595 | 0.19425  | 0.001164 | hypermethylated |
| cg25974626 | 0.79474 | 0.908997838 | 0.193794 | 0.000569 | hypermethylated |
| cg25107522 | 0.61505 | 0.703190811 | 0.193213 | 0.00341  | hypermethylated |
| cg01440556 | 0.77328 | 0.883989189 | 0.193038 | 0.008138 | hypermethylated |
| cg16014725 | 0.69555 | 0.795038378 | 0.19287  | 0.023591 | hypermethylated |
| cg19244312 | 0.77217 | 0.882429189 | 0.192562 | 0.000283 | hypermethylated |
| cg16509192 | 0.77927 | 0.890368108 | 0.192279 | 0.005606 | hypermethylated |
| cg19402371 | 0.67484 | 0.770962162 | 0.192115 | 0.000212 | hypermethylated |
| cg16012489 | 0.78232 | 0.893644865 | 0.191943 | 0.0006   | hypermethylated |
| cg10507231 | 0.8065  | 0.921261622 | 0.191936 | 0.000101 | hypermethylated |
| cg04009342 | 0.7533  | 0.86042     | 0.191817 | 8.22E-05 | hypermethylated |
| cg27017251 | 0.77894 | 0.889705946 | 0.191816 | 0.013698 | hypermethylated |
| cg16437087 | 0.71467 | 0.816112432 | 0.191491 | 0.001041 | hypermethylated |
| cg22599115 | 0.78431 | 0.895611351 | 0.191449 | 0.001395 | hypermethylated |
| cg05583014 | 0.66824 | 0.763017297 | 0.191349 | 0.015196 | hypermethylated |
| cg25356006 | 0.77545 | 0.885169189 | 0.190919 | 0.000501 | hypermethylated |
| cg05620165 | 0.68879 | 0.78599027  | 0.190447 | 0.00014  | hypermethylated |

|            |         |             |          |          |                 |
|------------|---------|-------------|----------|----------|-----------------|
| cg23250157 | 0.71072 | 0.81086973  | 0.190189 | 0.004951 | hypermethylated |
| cg23723818 | 0.74871 | 0.854096757 | 0.189992 | 0.005656 | hypermethylated |
| cg17869851 | 0.79143 | 0.902335135 | 0.189202 | 0.01021  | hypermethylated |
| cg18818210 | 0.71348 | 0.813416216 | 0.189121 | 0.000741 | hypermethylated |
| cg06740950 | 0.6923  | 0.789184865 | 0.188966 | 0.000893 | hypermethylated |
| cg12121983 | 0.69377 | 0.790776757 | 0.188813 | 0.010042 | hypermethylated |
| cg22633932 | 0.76507 | 0.871948108 | 0.188651 | 0.046857 | hypermethylated |
| cg17881203 | 0.71983 | 0.820377297 | 0.188631 | 0.002432 | hypermethylated |
| cg04006457 | 0.60762 | 0.69246     | 0.188561 | 0.00421  | hypermethylated |
| cg17048000 | 0.60259 | 0.686514595 | 0.188114 | 0.00035  | hypermethylated |
| cg08932381 | 0.80432 | 0.916252432 | 0.187976 | 0.003808 | hypermethylated |
| cg12034847 | 0.73565 | 0.838011351 | 0.18795  | 0.006914 | hypermethylated |
| cg19068479 | 0.79125 | 0.901178378 | 0.187679 | 0.000789 | hypermethylated |
| cg16404259 | 0.72387 | 0.8244      | 0.187614 | 0.001063 | hypermethylated |
| cg14800197 | 0.73979 | 0.842407027 | 0.187402 | 0.015809 | hypermethylated |
| cg16719582 | 0.70039 | 0.797425946 | 0.187192 | 0.019064 | hypermethylated |
| cg21585100 | 0.81124 | 0.923522162 | 0.187018 | 0.042869 | hypermethylated |
| cg26714129 | 0.72599 | 0.826454595 | 0.186986 | 0.000741 | hypermethylated |
| cg04217177 | 0.7159  | 0.814663784 | 0.186447 | 0.001526 | hypermethylated |
| cg14802771 | 0.77667 | 0.883701622 | 0.186258 | 0.000696 | hypermethylated |
| cg13187820 | 0.75548 | 0.85940973  | 0.185953 | 0.009632 | hypermethylated |
| cg25279739 | 0.77169 | 0.877707568 | 0.185719 | 0.002147 | hypermethylated |
| cg16234986 | 0.76393 | 0.868794054 | 0.185574 | 0.01606  | hypermethylated |
| cg23900070 | 0.75078 | 0.853771351 | 0.18546  | 0.005269 | hypermethylated |
| cg15880211 | 0.80423 | 0.914312973 | 0.18508  | 0.012134 | hypermethylated |
| cg08192337 | 0.76462 | 0.869251351 | 0.18503  | 0.003021 | hypermethylated |
| cg04074001 | 0.78937 | 0.897374054 | 0.185008 | 0.001603 | hypermethylated |
| cg25762262 | 0.78393 | 0.891111351 | 0.184881 | 0.029448 | hypermethylated |
| cg15722265 | 0.6325  | 0.718975135 | 0.184876 | 0.000772 | hypermethylated |
| cg10613684 | 0.77292 | 0.878553514 | 0.184811 | 0.001949 | hypermethylated |
| cg00177875 | 0.63337 | 0.719741081 | 0.184429 | 0.000613 | hypermethylated |
| cg00886598 | 0.77061 | 0.875501622 | 0.184109 | 0.002231 | hypermethylated |
| cg08186575 | 0.77248 | 0.877435676 | 0.183796 | 0.031207 | hypermethylated |
| cg24232092 | 0.77778 | 0.883069189 | 0.183164 | 0.002318 | hypermethylated |
| cg07315755 | 0.76179 | 0.864398919 | 0.182304 | 0.005508 | hypermethylated |
| cg25136408 | 0.78966 | 0.895797297 | 0.181941 | 0.030537 | hypermethylated |
| cg06371489 | 0.67238 | 0.762717838 | 0.181873 | 0.00151  | hypermethylated |
| cg13322954 | 0.72262 | 0.819678919 | 0.181822 | 0.009794 | hypermethylated |
| cg11507187 | 0.69995 | 0.793854595 | 0.181623 | 0.000797 | hypermethylated |
| cg05520712 | 0.72481 | 0.82180973  | 0.181202 | 0.000653 | hypermethylated |
| cg11539296 | 0.68005 | 0.770478378 | 0.180114 | 0.001667 | hypermethylated |
| cg22724228 | 0.72017 | 0.815927027 | 0.180103 | 0.002066 | hypermethylated |
| cg03860982 | 0.81878 | 0.927430811 | 0.179764 | 0.001571 | hypermethylated |
| cg24693478 | 0.72398 | 0.819918919 | 0.179531 | 0.002007 | hypermethylated |
| cg27225130 | 0.69421 | 0.786157838 | 0.179447 | 0.002026 | hypermethylated |
| cg04295172 | 0.74461 | 0.842674595 | 0.178491 | 0.005459 | hypermethylated |
| cg08580032 | 0.74095 | 0.838228649 | 0.177968 | 0.00255  | hypermethylated |
| cg06832406 | 0.75927 | 0.858949189 | 0.17796  | 0.000293 | hypermethylated |
| cg10567498 | 0.74462 | 0.841488108 | 0.176439 | 0.003378 | hypermethylated |
| cg01636354 | 0.71514 | 0.808151351 | 0.1764   | 9.49E-05 | hypermethylated |
| cg13837295 | 0.82641 | 0.933652973 | 0.176029 | 0.008562 | hypermethylated |
| cg04206025 | 0.82294 | 0.929686486 | 0.175957 | 0.005962 | hypermethylated |
| cg18330866 | 0.71062 | 0.802721081 | 0.17582  | 0.001987 | hypermethylated |
| cg00021933 | 0.79329 | 0.895591351 | 0.174992 | 0.000674 | hypermethylated |
| cg02722434 | 0.64263 | 0.725416216 | 0.174821 | 0.001821 | hypermethylated |
| cg08996678 | 0.71827 | 0.810492973 | 0.174273 | 0.00291  | hypermethylated |
| cg18127648 | 0.76163 | 0.859012432 | 0.173589 | 0.010554 | hypermethylated |
| cg14711433 | 0.71004 | 0.800767027 | 0.173482 | 0.015561 | hypermethylated |

|            |         |             |          |          |                 |
|------------|---------|-------------|----------|----------|-----------------|
| cg13707645 | 0.66907 | 0.754368108 | 0.173112 | 0.007933 | hypermethylated |
| cg24938743 | 0.7398  | 0.833694054 | 0.172383 | 0.014488 | hypermethylated |
| cg20677171 | 0.72365 | 0.81527027  | 0.171986 | 3.49E-05 | hypermethylated |
| cg13739115 | 0.72157 | 0.812785405 | 0.171735 | 0.000789 | hypermethylated |
| cg22941086 | 0.72771 | 0.819673514 | 0.171686 | 0.002318 | hypermethylated |
| cg24219966 | 0.74769 | 0.841965405 | 0.171321 | 0.003107 | hypermethylated |
| cg10888399 | 0.68538 | 0.771005405 | 0.169837 | 0.000857 | hypermethylated |
| cg16190209 | 0.77828 | 0.875469189 | 0.169767 | 0.002318 | hypermethylated |
| cg00329728 | 0.74807 | 0.84141027  | 0.169636 | 0.000545 | hypermethylated |
| cg13672348 | 0.84198 | 0.947024865 | 0.169616 | 0.000137 | hypermethylated |
| cg22512256 | 0.79649 | 0.895557297 | 0.169129 | 0.01073  | hypermethylated |
| cg08643997 | 0.646   | 0.726294595 | 0.169021 | 0.022549 | hypermethylated |
| cg18714398 | 0.76922 | 0.864443784 | 0.168376 | 0.014258 | hypermethylated |
| cg09870004 | 0.81918 | 0.920345405 | 0.167995 | 0.001466 | hypermethylated |
| cg11629889 | 0.77579 | 0.871346486 | 0.16758  | 0.001603 | hypermethylated |
| cg04020211 | 0.83559 | 0.938154595 | 0.16703  | 0.004906 | hypermethylated |
| cg00826626 | 0.84058 | 0.943525405 | 0.166676 | 0.00849  | hypermethylated |
| cg13185177 | 0.76242 | 0.855787027 | 0.166666 | 0.00095  | hypermethylated |
| cg17337672 | 0.79454 | 0.891784324 | 0.166575 | 0.000789 | hypermethylated |
| cg05992600 | 0.72859 | 0.817729189 | 0.166516 | 0.003136 | hypermethylated |
| cg22417566 | 0.80438 | 0.902441081 | 0.165956 | 0.014258 | hypermethylated |
| cg25942940 | 0.78473 | 0.880128108 | 0.165517 | 2.10E-05 | hypermethylated |
| cg13733008 | 0.75938 | 0.850571892 | 0.163611 | 0.000358 | hypermethylated |
| cg12169568 | 0.73489 | 0.822937838 | 0.163255 | 0.001603 | hypermethylated |
| cg02449727 | 0.73831 | 0.826610811 | 0.162982 | 0.004248 | hypermethylated |
| cg07969308 | 0.75518 | 0.845145946 | 0.16238  | 0.001052 | hypermethylated |
| cg27174778 | 0.80286 | 0.898505405 | 0.162379 | 0.001354 | hypermethylated |
| cg21715599 | 0.74718 | 0.83597027  | 0.161996 | 0.016444 | hypermethylated |
| cg14484885 | 0.75344 | 0.842708108 | 0.16154  | 0.008636 | hypermethylated |
| cg19931529 | 0.76906 | 0.859936757 | 0.161134 | 0.002066 | hypermethylated |
| cg14091497 | 0.68773 | 0.768292432 | 0.159813 | 0.000113 | hypermethylated |
| cg24151755 | 0.72508 | 0.809991892 | 0.159767 | 0.007408 | hypermethylated |
| cg14660788 | 0.77138 | 0.861360541 | 0.159175 | 4.58E-05 | hypermethylated |
| cg07555125 | 0.78605 | 0.877654595 | 0.159032 | 0.000335 | hypermethylated |
| cg01536744 | 0.73195 | 0.816095676 | 0.156993 | 0.003538 | hypermethylated |
| cg02827340 | 0.7436  | 0.828938378 | 0.156738 | 0.03076  | hypermethylated |
| cg27243166 | 0.78746 | 0.877772432 | 0.15664  | 0.000506 | hypermethylated |
| cg17528559 | 0.77927 | 0.867731892 | 0.155126 | 0.00066  | hypermethylated |
| cg26212135 | 0.79145 | 0.880895135 | 0.154472 | 0.001118 | hypermethylated |
| cg19910231 | 0.7986  | 0.888408108 | 0.153749 | 0.001875 | hypermethylated |
| cg04839897 | 0.76913 | 0.855472973 | 0.153495 | 0.003773 | hypermethylated |
| cg15652169 | 0.73738 | 0.819522703 | 0.152376 | 0.001635 | hypermethylated |
| cg15712323 | 0.82056 | 0.911962162 | 0.152365 | 0.003136 | hypermethylated |
| cg10763247 | 0.78174 | 0.868413514 | 0.151693 | 0.001118 | hypermethylated |
| cg16244648 | 0.75212 | 0.835221081 | 0.151195 | 0.001734 | hypermethylated |
| cg19625388 | 0.83165 | 0.922772432 | 0.149998 | 0.000551 | hypermethylated |
| cg17214456 | 0.72294 | 0.801788649 | 0.149346 | 0.002126 | hypermethylated |
| cg11543229 | 0.81426 | 0.902107568 | 0.14781  | 0.001603 | hypermethylated |
| cg10441640 | 0.64275 | 0.711769189 | 0.147152 | 0.002253 | hypermethylated |
| cg08570574 | 0.77121 | 0.85378973  | 0.146757 | 0.015316 | hypermethylated |
| cg12630983 | 0.80663 | 0.892402703 | 0.145788 | 0.003773 | hypermethylated |
| cg22973172 | 0.78808 | 0.870494595 | 0.143493 | 0.008932 | hypermethylated |
| cg01903185 | 0.82692 | 0.912927568 | 0.142753 | 0.001803 | hypermethylated |
| cg23055499 | 0.79841 | 0.880959459 | 0.141946 | 0.033772 | hypermethylated |
| cg09976876 | 0.78172 | 0.861217838 | 0.139726 | 0.005176 | hypermethylated |
| cg01993818 | 0.82054 | 0.901425946 | 0.135635 | 0.00064  | hypermethylated |
| cg08945642 | 0.81201 | 0.891944865 | 0.135457 | 0.003808 | hypermethylated |
| cg04466022 | 0.84119 | 0.923025946 | 0.13394  | 0.000789 | hypermethylated |

|            |         |             |           |          |                 |
|------------|---------|-------------|-----------|----------|-----------------|
| cg14398860 | 0.87097 | 0.953742703 | 0.130977  | 0.033768 | hypermethylated |
| cg27311970 | 0.80966 | 0.886197838 | 0.130313  | 0.007536 | hypermethylated |
| cg10628201 | 0.86181 | 0.942787027 | 0.129562  | 0.000733 | hypermethylated |
| cg11494841 | 0.79763 | 0.871854054 | 0.128367  | 0.004248 | hypermethylated |
| cg24145007 | 0.82365 | 0.896972432 | 0.123032  | 0.003316 | hypermethylated |
| cg07145834 | 0.87667 | 0.791924324 | -0.146671 | 0.000528 | hypomethylated  |
| cg08293097 | 0.88572 | 0.798316216 | -0.14989  | 0.000893 | hypomethylated  |
| cg01219670 | 0.86508 | 0.778758919 | -0.151657 | 0.000921 | hypomethylated  |
| cg21840908 | 0.82512 | 0.742777297 | -0.151674 | 0.001541 | hypomethylated  |
| cg18921306 | 0.87026 | 0.780291892 | -0.157433 | 0.002649 | hypomethylated  |
| cg06920946 | 0.87873 | 0.787591351 | -0.157973 | 0.0003   | hypomethylated  |
| cg25881591 | 0.88317 | 0.791051892 | -0.158919 | 0.001052 | hypomethylated  |
| cg08169830 | 0.87671 | 0.784707568 | -0.159945 | 0.00024  | hypomethylated  |
| cg23020514 | 0.84904 | 0.758850811 | -0.162016 | 0.002699 | hypomethylated  |
| cg11699334 | 0.79787 | 0.712320541 | -0.163627 | 0.006451 | hypomethylated  |
| cg27648270 | 0.83498 | 0.742847568 | -0.168675 | 0.001188 | hypomethylated  |
| cg19156963 | 0.8418  | 0.748791351 | -0.168914 | 0.000449 | hypomethylated  |
| cg14281092 | 0.88409 | 0.786220541 | -0.169259 | 0.000839 | hypomethylated  |
| cg12221621 | 0.8642  | 0.768475135 | -0.169367 | 0.001212 | hypomethylated  |
| cg08549536 | 0.88096 | 0.781161081 | -0.173456 | 0.000374 | hypomethylated  |
| cg14751481 | 0.83381 | 0.739168108 | -0.173816 | 0.000435 | hypomethylated  |
| cg12084235 | 0.86254 | 0.764333514 | -0.174389 | 6.78E-05 | hypomethylated  |
| cg26978611 | 0.8494  | 0.75189027  | -0.175922 | 0.001571 | hypomethylated  |
| cg11693986 | 0.87689 | 0.776127568 | -0.176102 | 7.12E-05 | hypomethylated  |
| cg16799805 | 0.81058 | 0.715372973 | -0.180259 | 0.00078  | hypomethylated  |
| cg18029039 | 0.82568 | 0.728424865 | -0.180803 | 0.000474 | hypomethylated  |
| cg13753183 | 0.87604 | 0.772852973 | -0.180803 | 6.05E-06 | hypomethylated  |
| cg10532384 | 0.83148 | 0.733341081 | -0.181197 | 0.000893 | hypomethylated  |
| cg26639730 | 0.84916 | 0.748254054 | -0.182508 | 0.000417 | hypomethylated  |
| cg25270574 | 0.92257 | 0.812825946 | -0.182712 | 4.86E-06 | hypomethylated  |
| cg11631579 | 0.78488 | 0.690852973 | -0.184093 | 0.019511 | hypomethylated  |
| cg20553938 | 0.87887 | 0.773031351 | -0.185123 | 1.40E-05 | hypomethylated  |
| cg07173218 | 0.84188 | 0.739802162 | -0.186475 | 0.000259 | hypomethylated  |
| cg15207055 | 0.82094 | 0.721316216 | -0.186645 | 0.000551 | hypomethylated  |
| cg03001333 | 0.85518 | 0.751378378 | -0.186689 | 0.001541 | hypomethylated  |
| cg17896636 | 0.9577  | 0.841444865 | -0.186705 | 6.86E-05 | hypomethylated  |
| cg10626896 | 0.86276 | 0.757910811 | -0.186931 | 0.000528 | hypomethylated  |
| cg10284115 | 0.88057 | 0.773460541 | -0.18711  | 8.13E-05 | hypomethylated  |
| cg19016972 | 0.84824 | 0.744581081 | -0.188044 | 0.000342 | hypomethylated  |
| cg22272100 | 0.86035 | 0.754530811 | -0.189344 | 2.85E-05 | hypomethylated  |
| cg19392379 | 0.78352 | 0.686682703 | -0.190326 | 0.002106 | hypomethylated  |
| cg18765405 | 0.87407 | 0.765993514 | -0.190417 | 0.00032  | hypomethylated  |
| cg19110982 | 0.83322 | 0.729952973 | -0.190894 | 1.84E-05 | hypomethylated  |
| cg14789529 | 0.85443 | 0.747952432 | -0.192016 | 0.003705 | hypomethylated  |
| cg21138550 | 0.84527 | 0.739932432 | -0.192019 | 9.27E-05 | hypomethylated  |
| cg22614327 | 0.8243  | 0.720999459 | -0.193171 | 0.003136 | hypomethylated  |
| cg15012607 | 0.87583 | 0.765842703 | -0.193603 | 2.32E-05 | hypomethylated  |
| cg21935113 | 0.84584 | 0.7395      | -0.193835 | 0.000848 | hypomethylated  |
| cg13008935 | 0.85051 | 0.743305405 | -0.194373 | 8.94E-05 | hypomethylated  |
| cg16241867 | 0.77666 | 0.678709189 | -0.19449  | 0.003316 | hypomethylated  |
| cg22734451 | 0.73829 | 0.644924865 | -0.195057 | 0.000893 | hypomethylated  |
| cg24003866 | 0.85132 | 0.743089189 | -0.196166 | 0.0003   | hypomethylated  |
| cg24712244 | 0.85149 | 0.743203784 | -0.196232 | 0.00049  | hypomethylated  |
| cg20385001 | 0.8439  | 0.735801622 | -0.197755 | 0.000575 | hypomethylated  |
| cg24950003 | 0.89691 | 0.781878919 | -0.198018 | 0.00014  | hypomethylated  |
| cg16612995 | 0.8658  | 0.754260541 | -0.198971 | 1.68E-05 | hypomethylated  |
| cg19897979 | 0.86664 | 0.754956216 | -0.19904  | 0.000191 | hypomethylated  |
| cg15993652 | 0.85014 | 0.740482162 | -0.199235 | 3.40E-05 | hypomethylated  |

|            |         |             |           |          |                |
|------------|---------|-------------|-----------|----------|----------------|
| cg10703692 | 0.74658 | 0.650135676 | -0.199556 | 0.00305  | hypomethylated |
| cg13965612 | 0.7723  | 0.672355676 | -0.199937 | 0.002274 | hypomethylated |
| cg04503093 | 0.87048 | 0.75773027  | -0.200127 | 0.000435 | hypomethylated |
| cg10109635 | 0.85869 | 0.747119459 | -0.200798 | 0.00064  | hypomethylated |
| cg14607208 | 0.77847 | 0.677067027 | -0.201343 | 0.000921 | hypomethylated |
| cg25059541 | 0.85178 | 0.740723784 | -0.201545 | 6.66E-06 | hypomethylated |
| cg02551234 | 0.86926 | 0.755868649 | -0.201652 | 0.000224 | hypomethylated |
| cg26686339 | 0.76019 | 0.661014054 | -0.201679 | 0.000528 | hypomethylated |
| cg05954614 | 0.77183 | 0.671038378 | -0.201888 | 0.000403 | hypomethylated |
| cg21763718 | 0.85027 | 0.738817838 | -0.202702 | 1.04E-05 | hypomethylated |
| cg22550815 | 0.88976 | 0.773099459 | -0.202762 | 0.000198 | hypomethylated |
| cg24854914 | 0.90427 | 0.785474054 | -0.20319  | 3.81E-05 | hypomethylated |
| cg15065821 | 0.88673 | 0.770095135 | -0.203458 | 3.57E-05 | hypomethylated |
| cg07528349 | 0.7315  | 0.634952432 | -0.204209 | 0.000182 | hypomethylated |
| cg05829046 | 0.76084 | 0.66028     | -0.204515 | 0.000435 | hypomethylated |
| cg23068797 | 0.77973 | 0.676114595 | -0.205707 | 0.001541 | hypomethylated |
| cg20837332 | 0.84164 | 0.729405946 | -0.206481 | 6.23E-05 | hypomethylated |
| cg19513004 | 0.88563 | 0.767348649 | -0.206822 | 9.05E-05 | hypomethylated |
| cg22348299 | 0.87725 | 0.759978919 | -0.207029 | 1.58E-05 | hypomethylated |
| cg06368978 | 0.90103 | 0.78056973  | -0.207048 | 9.38E-05 | hypomethylated |
| cg22519265 | 0.83993 | 0.727611351 | -0.207101 | 0.000857 | hypomethylated |
| cg09389280 | 0.93228 | 0.807602162 | -0.207119 | 2.57E-05 | hypomethylated |
| cg09990481 | 0.78476 | 0.679692973 | -0.207368 | 0.000127 | hypomethylated |
| cg16885779 | 0.76647 | 0.663848108 | -0.207376 | 0.002026 | hypomethylated |
| cg14184954 | 0.86492 | 0.748731892 | -0.208117 | 0.00039  | hypomethylated |
| cg21816849 | 0.74636 | 0.645857838 | -0.208655 | 0.000454 | hypomethylated |
| cg11443888 | 0.82665 | 0.715097297 | -0.209137 | 0.000109 | hypomethylated |
| cg07575086 | 0.76955 | 0.665642703 | -0.209267 | 0.002007 | hypomethylated |
| cg27134084 | 0.87052 | 0.752802703 | -0.209606 | 0.000253 | hypomethylated |
| cg08129761 | 0.88928 | 0.768822162 | -0.209988 | 9.07E-06 | hypomethylated |
| cg16300681 | 0.87911 | 0.759768108 | -0.210485 | 4.05E-05 | hypomethylated |
| cg19201009 | 0.8766  | 0.757246486 | -0.211156 | 0.000204 | hypomethylated |
| cg12360123 | 0.86156 | 0.744148108 | -0.211361 | 9.05E-05 | hypomethylated |
| cg18681028 | 0.79596 | 0.687202162 | -0.211961 | 0.000426 | hypomethylated |
| cg10855276 | 0.82288 | 0.710423784 | -0.212002 | 0.000733 | hypomethylated |
| cg27074355 | 0.87792 | 0.757886486 | -0.212108 | 1.99E-05 | hypomethylated |
| cg24350484 | 0.81637 | 0.704674595 | -0.212266 | 2.81E-05 | hypomethylated |
| cg08964435 | 0.93519 | 0.806840541 | -0.212976 | 1.35E-05 | hypomethylated |
| cg16139249 | 0.85627 | 0.738291351 | -0.213876 | 0.0006   | hypomethylated |
| cg16419124 | 0.95325 | 0.821805946 | -0.214057 | 8.15E-06 | hypomethylated |
| cg22626525 | 0.80106 | 0.690401622 | -0.214474 | 0.000365 | hypomethylated |
| cg14560571 | 0.8221  | 0.708452432 | -0.214643 | 1.46E-05 | hypomethylated |
| cg21482176 | 0.88649 | 0.763516216 | -0.215446 | 4.88E-05 | hypomethylated |
| cg09980626 | 0.85171 | 0.733511892 | -0.215542 | 6.05E-06 | hypomethylated |
| cg04839409 | 0.84303 | 0.725885946 | -0.215841 | 4.76E-05 | hypomethylated |
| cg21343189 | 0.63083 | 0.543070811 | -0.216111 | 0.000374 | hypomethylated |
| cg19725098 | 0.87914 | 0.756790811 | -0.216198 | 2.85E-05 | hypomethylated |
| cg07663765 | 0.80016 | 0.688798919 | -0.216206 | 0.000129 | hypomethylated |
| cg22644320 | 0.85731 | 0.737365946 | -0.217436 | 0.001409 | hypomethylated |
| cg19462022 | 0.87018 | 0.748429189 | -0.217448 | 0.000588 | hypomethylated |
| cg23587532 | 0.79183 | 0.680768108 | -0.218027 | 0.00035  | hypomethylated |
| cg01690119 | 0.67573 | 0.580924865 | -0.218095 | 0.003441 | hypomethylated |
| cg16092390 | 0.73223 | 0.629406486 | -0.218305 | 0.000822 | hypomethylated |
| cg21218883 | 0.88653 | 0.762023243 | -0.218334 | 3.07E-05 | hypomethylated |
| cg05908960 | 0.82191 | 0.706419459 | -0.218455 | 3.23E-05 | hypomethylated |
| cg07544392 | 0.75996 | 0.653171892 | -0.218461 | 0.000756 | hypomethylated |
| cg07132492 | 0.82669 | 0.710469189 | -0.218574 | 0.000112 | hypomethylated |
| cg13179915 | 0.8201  | 0.704799459 | -0.218587 | 6.62E-05 | hypomethylated |

|            |         |             |           |          |                |
|------------|---------|-------------|-----------|----------|----------------|
| cg10100437 | 0.84894 | 0.729455135 | -0.218843 | 0.000822 | hypomethylated |
| cg07316730 | 0.82164 | 0.705973514 | -0.218892 | 0.000569 | hypomethylated |
| cg03833060 | 0.8608  | 0.739612432 | -0.218909 | 0.000229 | hypomethylated |
| cg10071602 | 0.89672 | 0.770324865 | -0.219191 | 1.01E-05 | hypomethylated |
| cg27503117 | 0.84066 | 0.722055135 | -0.219413 | 3.95E-05 | hypomethylated |
| cg11803660 | 0.70725 | 0.607321622 | -0.21976  | 0.002574 | hypomethylated |
| cg07821739 | 0.85496 | 0.734122703 | -0.219836 | 0.000145 | hypomethylated |
| cg02668822 | 0.8395  | 0.720798919 | -0.219933 | 4.53E-05 | hypomethylated |
| cg05926784 | 0.71027 | 0.609798378 | -0.220035 | 0.001141 | hypomethylated |
| cg13926833 | 0.80536 | 0.691432973 | -0.220044 | 0.001423 | hypomethylated |
| cg09077530 | 0.79364 | 0.681337297 | -0.220116 | 0.000449 | hypomethylated |
| cg19910930 | 0.88362 | 0.758434054 | -0.220402 | 0.000147 | hypomethylated |
| cg25701710 | 0.86285 | 0.740519459 | -0.220572 | 0.000287 | hypomethylated |
| cg05813616 | 0.84503 | 0.725203243 | -0.220617 | 0.000129 | hypomethylated |
| cg20870752 | 0.83284 | 0.714112973 | -0.221887 | 5.65E-05 | hypomethylated |
| cg05390927 | 0.85419 | 0.732394595 | -0.221936 | 4.58E-05 | hypomethylated |
| cg11444527 | 0.87692 | 0.751537838 | -0.222599 | 1.58E-05 | hypomethylated |
| cg13330005 | 0.80205 | 0.687075676 | -0.223223 | 0.000248 | hypomethylated |
| cg05041265 | 0.81791 | 0.700564324 | -0.223425 | 0.00049  | hypomethylated |
| cg02872930 | 0.77109 | 0.66036     | -0.223647 | 2.78E-05 | hypomethylated |
| cg04263391 | 0.90797 | 0.777408649 | -0.223971 | 1.01E-05 | hypomethylated |
| cg14756040 | 0.75077 | 0.642768108 | -0.224073 | 2.96E-05 | hypomethylated |
| cg08017409 | 0.78323 | 0.670397838 | -0.224419 | 0.001423 | hypomethylated |
| cg19771626 | 0.71215 | 0.609507568 | -0.224537 | 0.003021 | hypomethylated |
| cg13808936 | 0.748   | 0.640187568 | -0.224544 | 0.005508 | hypomethylated |
| cg07021447 | 0.79739 | 0.682443243 | -0.224576 | 0.000893 | hypomethylated |
| cg05258834 | 0.84422 | 0.722159459 | -0.225302 | 7.84E-05 | hypomethylated |
| cg01766943 | 0.80651 | 0.689804865 | -0.225504 | 0.000138 | hypomethylated |
| cg25459300 | 0.81822 | 0.699702703 | -0.225747 | 0.002699 | hypomethylated |
| cg00169930 | 0.83793 | 0.716468649 | -0.225926 | 9.05E-05 | hypomethylated |
| cg20619563 | 0.84321 | 0.720917838 | -0.226057 | 0.000399 | hypomethylated |
| cg21646084 | 0.78378 | 0.669981081 | -0.226328 | 0.000154 | hypomethylated |
| cg24825974 | 0.90336 | 0.772125405 | -0.226466 | 1.75E-05 | hypomethylated |
| cg02176725 | 0.90686 | 0.775078919 | -0.226537 | 1.21E-05 | hypomethylated |
| cg11592082 | 0.73771 | 0.630489189 | -0.226582 | 5.65E-05 | hypomethylated |
| cg01628737 | 0.89763 | 0.767151351 | -0.22661  | 1.99E-06 | hypomethylated |
| cg14186944 | 0.77497 | 0.662282703 | -0.226693 | 0.000306 | hypomethylated |
| cg01142096 | 0.88227 | 0.753978919 | -0.226696 | 0.000214 | hypomethylated |
| cg20614157 | 0.91777 | 0.784231892 | -0.226852 | 0.000112 | hypomethylated |
| cg06402330 | 0.83147 | 0.710316216 | -0.227203 | 0.000155 | hypomethylated |
| cg20642630 | 0.81652 | 0.697473514 | -0.22735  | 0.000435 | hypomethylated |
| cg09827902 | 0.88111 | 0.752550811 | -0.227533 | 4.15E-05 | hypomethylated |
| cg14342528 | 0.93681 | 0.799908649 | -0.227921 | 1.15E-06 | hypomethylated |
| cg27625401 | 0.75544 | 0.645018378 | -0.227977 | 0.000696 | hypomethylated |
| cg13601740 | 0.86315 | 0.736885405 | -0.228171 | 8.73E-05 | hypomethylated |
| cg13730392 | 0.81599 | 0.696605405 | -0.22821  | 3.67E-05 | hypomethylated |
| cg12208770 | 0.70049 | 0.59796973  | -0.228292 | 0.000607 | hypomethylated |
| cg11888738 | 0.76495 | 0.652936216 | -0.228423 | 0.001875 | hypomethylated |
| cg10766866 | 0.78219 | 0.667563243 | -0.228615 | 0.000182 | hypomethylated |
| cg01583021 | 0.75779 | 0.646252973 | -0.229699 | 0.000145 | hypomethylated |
| cg27017414 | 0.83455 | 0.711611892 | -0.229908 | 9.49E-05 | hypomethylated |
| cg14212953 | 0.83461 | 0.711621622 | -0.229992 | 6.46E-05 | hypomethylated |
| cg16523185 | 0.78489 | 0.669198919 | -0.230055 | 0.000395 | hypomethylated |
| cg08136313 | 0.77223 | 0.658385946 | -0.230097 | 0.001437 | hypomethylated |
| cg20478261 | 0.84768 | 0.722691892 | -0.230139 | 0.000259 | hypomethylated |
| cg07791418 | 0.85061 | 0.725014054 | -0.230489 | 7.29E-05 | hypomethylated |
| cg08851181 | 0.84891 | 0.723557838 | -0.230503 | 4.70E-05 | hypomethylated |
| cg22807241 | 0.86938 | 0.740918378 | -0.230672 | 2.39E-05 | hypomethylated |

|            |         |             |           |          |                |
|------------|---------|-------------|-----------|----------|----------------|
| cg13997759 | 0.84939 | 0.723867568 | -0.230701 | 0.00039  | hypomethylated |
| cg17767099 | 0.67387 | 0.574262162 | -0.230761 | 0.001288 | hypomethylated |
| cg24163568 | 0.75485 | 0.643214054 | -0.230891 | 0.000718 | hypomethylated |
| cg19873496 | 0.81128 | 0.691145946 | -0.23121  | 0.001452 | hypomethylated |
| cg27573017 | 0.80317 | 0.684227568 | -0.231229 | 0.000102 | hypomethylated |
| cg14606082 | 0.74581 | 0.635331351 | -0.231299 | 0.000725 | hypomethylated |
| cg27186519 | 0.76293 | 0.6499      | -0.231333 | 0.000534 | hypomethylated |
| cg12084631 | 0.73038 | 0.622092432 | -0.231518 | 0.000313 | hypomethylated |
| cg24994755 | 0.85274 | 0.726271892 | -0.231596 | 6.15E-05 | hypomethylated |
| cg13383734 | 0.76657 | 0.652841081 | -0.231686 | 0.000399 | hypomethylated |
| cg19391697 | 0.78798 | 0.671022162 | -0.231799 | 0.00094  | hypomethylated |
| cg02004044 | 0.86682 | 0.738078378 | -0.231958 | 8.42E-05 | hypomethylated |
| cg26598918 | 0.94652 | 0.805661622 | -0.232459 | 3.67E-05 | hypomethylated |
| cg26636061 | 0.72111 | 0.613634595 | -0.23284  | 0.000256 | hypomethylated |
| cg27469606 | 0.88483 | 0.752823784 | -0.233088 | 4.58E-05 | hypomethylated |
| cg25202141 | 0.89799 | 0.763887027 | -0.23334  | 4.64E-05 | hypomethylated |
| cg16022580 | 0.78766 | 0.669975676 | -0.233464 | 0.000327 | hypomethylated |
| cg14777519 | 0.85537 | 0.727542162 | -0.233518 | 6.01E-05 | hypomethylated |
| cg26226167 | 0.9117  | 0.775162162 | -0.234061 | 5.50E-06 | hypomethylated |
| cg04824378 | 0.83706 | 0.711676216 | -0.23411  | 2.71E-05 | hypomethylated |
| cg22430700 | 0.77131 | 0.655772973 | -0.234114 | 0.001452 | hypomethylated |
| cg16716189 | 0.82033 | 0.697352432 | -0.234316 | 0.000145 | hypomethylated |
| cg24830241 | 0.75122 | 0.638548108 | -0.23444  | 0.00017  | hypomethylated |
| cg19003803 | 0.88998 | 0.756116757 | -0.235164 | 4.31E-05 | hypomethylated |
| cg07516958 | 0.89086 | 0.756777297 | -0.23533  | 8.60E-06 | hypomethylated |
| cg23000950 | 0.87639 | 0.744483243 | -0.235334 | 4.82E-05 | hypomethylated |
| cg01235983 | 0.90504 | 0.768768649 | -0.235432 | 6.57E-06 | hypomethylated |
| cg06219204 | 0.78859 | 0.669793514 | -0.235559 | 0.001052 | hypomethylated |
| cg26959827 | 0.78922 | 0.670291351 | -0.235639 | 0.000262 | hypomethylated |
| cg12562461 | 0.83988 | 0.713266486 | -0.235742 | 6.84E-06 | hypomethylated |
| cg02052536 | 0.83825 | 0.711865946 | -0.235775 | 0.000268 | hypomethylated |
| cg13941555 | 0.67948 | 0.576956216 | -0.235969 | 0.000126 | hypomethylated |
| cg06779421 | 0.75194 | 0.638358919 | -0.23625  | 4.47E-05 | hypomethylated |
| cg26027526 | 0.8546  | 0.725338919 | -0.236594 | 3.49E-05 | hypomethylated |
| cg24239195 | 0.93321 | 0.792055135 | -0.236601 | 9.69E-06 | hypomethylated |
| cg27072212 | 0.90601 | 0.768924324 | -0.236685 | 4.36E-06 | hypomethylated |
| cg10594543 | 0.9255  | 0.785461622 | -0.236692 | 4.12E-06 | hypomethylated |
| cg01792592 | 0.77937 | 0.661428108 | -0.236724 | 4.01E-06 | hypomethylated |
| cg02568619 | 0.82411 | 0.699356757 | -0.236808 | 0.000358 | hypomethylated |
| cg03510310 | 0.87    | 0.738211892 | -0.23698  | 4.70E-05 | hypomethylated |
| cg01682917 | 0.79101 | 0.671098919 | -0.237171 | 0.00028  | hypomethylated |
| cg20219172 | 0.87615 | 0.743237297 | -0.237355 | 0.000412 | hypomethylated |
| cg10013998 | 0.70473 | 0.59766973  | -0.237722 | 0.000633 | hypomethylated |
| cg06241812 | 0.8528  | 0.723192432 | -0.237828 | 3.62E-05 | hypomethylated |
| cg21291321 | 0.81247 | 0.688987027 | -0.237838 | 0.0006   | hypomethylated |
| cg03723715 | 0.72044 | 0.610941622 | -0.237844 | 0.000408 | hypomethylated |
| cg10997335 | 0.89104 | 0.755599459 | -0.237869 | 8.04E-06 | hypomethylated |
| cg26845817 | 0.86807 | 0.736014595 | -0.238077 | 1.75E-05 | hypomethylated |
| cg24800616 | 0.90332 | 0.76582     | -0.238232 | 5.65E-06 | hypomethylated |
| cg26270038 | 0.75858 | 0.643081081 | -0.238301 | 0.0006   | hypomethylated |
| cg22701672 | 0.81159 | 0.687932973 | -0.238483 | 0.000613 | hypomethylated |
| cg22498453 | 0.91269 | 0.773575676 | -0.238582 | 5.73E-06 | hypomethylated |
| cg23695131 | 0.80343 | 0.680857297 | -0.23882  | 0.000435 | hypomethylated |
| cg07782795 | 0.84473 | 0.715718919 | -0.239097 | 0.000189 | hypomethylated |
| cg08764509 | 0.81771 | 0.692776757 | -0.239199 | 4.76E-05 | hypomethylated |
| cg23048915 | 0.84386 | 0.714921622 | -0.239219 | 4.58E-05 | hypomethylated |
| cg07523470 | 0.87257 | 0.739212432 | -0.239282 | 4.36E-05 | hypomethylated |
| cg14517863 | 0.79166 | 0.670617838 | -0.23939  | 0.000342 | hypomethylated |

|            |         |             |           |          |                |
|------------|---------|-------------|-----------|----------|----------------|
| cg14928452 | 0.84493 | 0.715556757 | -0.239766 | 0.000293 | hypomethylated |
| cg17852876 | 0.80941 | 0.685409189 | -0.239905 | 0.000135 | hypomethylated |
| cg05454635 | 0.78205 | 0.662184324 | -0.240028 | 0.000324 | hypomethylated |
| cg04259971 | 0.76215 | 0.645175676 | -0.240383 | 4.94E-05 | hypomethylated |
| cg15451045 | 0.78062 | 0.660678919 | -0.240671 | 1.06E-05 | hypomethylated |
| cg19766178 | 0.88082 | 0.745372973 | -0.240885 | 6.78E-05 | hypomethylated |
| cg15748271 | 0.93136 | 0.78809027  | -0.240978 | 6.05E-06 | hypomethylated |
| cg14989661 | 0.87624 | 0.741439459 | -0.240997 | 0.000204 | hypomethylated |
| cg23273209 | 0.72544 | 0.613818378 | -0.241044 | 0.000189 | hypomethylated |
| cg04863197 | 0.86784 | 0.73415027  | -0.241354 | 0.000814 | hypomethylated |
| cg04978471 | 0.75328 | 0.637134054 | -0.241589 | 0.000174 | hypomethylated |
| cg06301529 | 0.90779 | 0.767778378 | -0.241669 | 1.09E-05 | hypomethylated |
| cg02213045 | 0.91261 | 0.771777838 | -0.241813 | 2.10E-05 | hypomethylated |
| cg09129839 | 0.86391 | 0.730528649 | -0.24194  | 4.26E-05 | hypomethylated |
| cg12448539 | 0.90049 | 0.761411351 | -0.242034 | 3.67E-05 | hypomethylated |
| cg13803455 | 0.86467 | 0.731077297 | -0.242126 | 5.79E-05 | hypomethylated |
| cg14993430 | 0.86459 | 0.730946486 | -0.24225  | 0.0002   | hypomethylated |
| cg02410245 | 0.79663 | 0.673487568 | -0.242258 | 0.000251 | hypomethylated |
| cg05928656 | 0.8526  | 0.720744324 | -0.242381 | 0.000187 | hypomethylated |
| cg20488341 | 0.84377 | 0.713267568 | -0.242406 | 0.000104 | hypomethylated |
| cg09293559 | 0.92339 | 0.780515676 | -0.242513 | 1.25E-05 | hypomethylated |
| cg26405835 | 0.89851 | 0.759416757 | -0.242643 | 2.56E-06 | hypomethylated |
| cg04862289 | 0.83413 | 0.704983784 | -0.242682 | 0.000399 | hypomethylated |
| cg12940991 | 0.79542 | 0.67226     | -0.242698 | 0.000168 | hypomethylated |
| cg05708073 | 0.87107 | 0.736161081 | -0.242767 | 1.94E-05 | hypomethylated |
| cg17489562 | 0.84544 | 0.71449027  | -0.242788 | 2.92E-05 | hypomethylated |
| cg15085006 | 0.89397 | 0.755486486 | -0.24282  | 6.11E-07 | hypomethylated |
| cg03407594 | 0.78763 | 0.665615135 | -0.24283  | 0.000485 | hypomethylated |
| cg17695682 | 0.86838 | 0.733762162 | -0.243014 | 4.36E-06 | hypomethylated |
| cg19505659 | 0.74807 | 0.632089189 | -0.243045 | 0.000626 | hypomethylated |
| cg18790382 | 0.88246 | 0.745554054 | -0.243218 | 1.97E-05 | hypomethylated |
| cg09507215 | 0.77877 | 0.657945946 | -0.243228 | 7.84E-05 | hypomethylated |
| cg06411506 | 0.79682 | 0.673184324 | -0.243252 | 2.85E-05 | hypomethylated |
| cg03312532 | 0.84004 | 0.709547568 | -0.243559 | 8.83E-06 | hypomethylated |
| cg04874343 | 0.73355 | 0.619516757 | -0.243752 | 1.42E-05 | hypomethylated |
| cg05220280 | 0.7383  | 0.623522703 | -0.243765 | 0.000107 | hypomethylated |
| cg08658981 | 0.82966 | 0.700620541 | -0.243887 | 6.48E-06 | hypomethylated |
| cg25987102 | 0.86854 | 0.733442703 | -0.243908 | 3.69E-06 | hypomethylated |
| cg11088489 | 0.77229 | 0.652015135 | -0.244237 | 0.003538 | hypomethylated |
| cg19025034 | 0.9037  | 0.76295027  | -0.244255 | 6.93E-06 | hypomethylated |
| cg04337188 | 0.84916 | 0.716768649 | -0.244529 | 5.86E-05 | hypomethylated |
| cg04691264 | 0.87576 | 0.739201622 | -0.244568 | 0.000127 | hypomethylated |
| cg00277384 | 0.8087  | 0.682594595 | -0.244576 | 9.95E-05 | hypomethylated |
| cg03687379 | 0.7756  | 0.654620541 | -0.244654 | 3.81E-05 | hypomethylated |
| cg09872392 | 0.78889 | 0.665782162 | -0.244774 | 9.49E-05 | hypomethylated |
| cg08128007 | 0.83459 | 0.704324324 | -0.244828 | 0.000147 | hypomethylated |
| cg24287175 | 0.70322 | 0.593445405 | -0.244861 | 0.000772 | hypomethylated |
| cg13587725 | 0.80966 | 0.683224865 | -0.244956 | 0.000109 | hypomethylated |
| cg06603851 | 0.89103 | 0.751647027 | -0.245419 | 1.93E-06 | hypomethylated |
| cg25219246 | 0.7251  | 0.611571351 | -0.245659 | 5.58E-05 | hypomethylated |
| cg13448828 | 0.88324 | 0.744918378 | -0.245723 | 1.44E-05 | hypomethylated |
| cg04962005 | 0.79211 | 0.668024324 | -0.2458   | 0.000417 | hypomethylated |
| cg09914060 | 0.85168 | 0.718253514 | -0.245818 | 9.19E-06 | hypomethylated |
| cg15003737 | 0.92288 | 0.778284324 | -0.245846 | 5.89E-06 | hypomethylated |
| cg02330507 | 0.85007 | 0.716773514 | -0.246064 | 1.08E-05 | hypomethylated |
| cg22800743 | 0.82076 | 0.691905405 | -0.246386 | 0.000111 | hypomethylated |
| cg16085744 | 0.91296 | 0.769570811 | -0.246498 | 3.30E-06 | hypomethylated |
| cg11741753 | 0.77122 | 0.649915135 | -0.246891 | 0.000517 | hypomethylated |



|            |         |             |           |          |                |
|------------|---------|-------------|-----------|----------|----------------|
| cg16671682 | 0.74757 | 0.629952973 | -0.246965 | 0.000226 | hypomethylated |
| cg01291665 | 0.83437 | 0.703043784 | -0.247073 | 9.05E-05 | hypomethylated |
| cg20584157 | 0.81419 | 0.686031892 | -0.24709  | 0.001556 | hypomethylated |
| cg08860443 | 0.87031 | 0.73318     | -0.247362 | 9.95E-05 | hypomethylated |
| cg09273059 | 0.76799 | 0.646852432 | -0.247651 | 0.003136 | hypomethylated |
| cg14418633 | 0.77898 | 0.656069189 | -0.247738 | 0.003808 | hypomethylated |
| cg19770715 | 0.89386 | 0.752811351 | -0.247761 | 1.56E-06 | hypomethylated |
| cg21005457 | 0.76195 | 0.641705946 | -0.247784 | 0.000182 | hypomethylated |
| cg14278300 | 0.75266 | 0.633873514 | -0.247803 | 0.000857 | hypomethylated |
| cg01651169 | 0.79527 | 0.669726486 | -0.247873 | 7.12E-05 | hypomethylated |
| cg06112923 | 0.9075  | 0.764148108 | -0.248045 | 1.17E-05 | hypomethylated |
| cg06284816 | 0.8772  | 0.738618378 | -0.248077 | 8.63E-05 | hypomethylated |
| cg22209441 | 0.72097 | 0.606945946 | -0.248371 | 0.000296 | hypomethylated |
| cg00013804 | 0.88486 | 0.744889189 | -0.248423 | 7.29E-05 | hypomethylated |
| cg13982220 | 0.60924 | 0.51283027  | -0.248529 | 0.000178 | hypomethylated |
| cg14582917 | 0.87036 | 0.732536216 | -0.248712 | 0.000234 | hypomethylated |
| cg01816186 | 0.85535 | 0.719849189 | -0.24882  | 0.000109 | hypomethylated |
| cg03445965 | 0.88881 | 0.747993514 | -0.248849 | 1.25E-05 | hypomethylated |
| cg03374561 | 0.63973 | 0.538349189 | -0.248921 | 0.001667 | hypomethylated |
| cg00850193 | 0.72096 | 0.606652432 | -0.249049 | 0.000189 | hypomethylated |
| cg20050877 | 0.78312 | 0.658927027 | -0.249115 | 0.001667 | hypomethylated |
| cg02144516 | 0.76663 | 0.644976757 | -0.249283 | 8.03E-05 | hypomethylated |
| cg01128109 | 0.77987 | 0.656065946 | -0.249393 | 0.001031 | hypomethylated |
| cg05272594 | 0.67762 | 0.570028108 | -0.249443 | 0.000399 | hypomethylated |
| cg21743867 | 0.8746  | 0.735655676 | -0.249593 | 5.28E-06 | hypomethylated |
| cg09227277 | 0.91916 | 0.773034595 | -0.249783 | 2.68E-06 | hypomethylated |
| cg13098960 | 0.63748 | 0.536111892 | -0.249846 | 0.0003   | hypomethylated |
| cg01985343 | 0.87919 | 0.739331351 | -0.249954 | 2.32E-05 | hypomethylated |
| cg02395127 | 0.81257 | 0.683213514 | -0.250156 | 0.000256 | hypomethylated |
| cg26309311 | 0.77792 | 0.653855135 | -0.250651 | 0.000262 | hypomethylated |
| cg19604641 | 0.92536 | 0.777720541 | -0.250763 | 5.58E-05 | hypomethylated |
| cg14277677 | 0.74526 | 0.626342703 | -0.250792 | 0.0003   | hypomethylated |
| cg14614490 | 0.70953 | 0.596217838 | -0.251024 | 0.000209 | hypomethylated |
| cg07620544 | 0.75734 | 0.636390811 | -0.251028 | 0.000163 | hypomethylated |
| cg20022869 | 0.68561 | 0.576081622 | -0.251115 | 0.000495 | hypomethylated |
| cg12683120 | 0.84871 | 0.713108649 | -0.25115  | 0.000104 | hypomethylated |
| cg11095658 | 0.84724 | 0.711739459 | -0.251421 | 1.01E-05 | hypomethylated |
| cg00792184 | 0.81423 | 0.683963243 | -0.251518 | 7.84E-05 | hypomethylated |
| cg11382394 | 0.90425 | 0.759505946 | -0.25166  | 7.12E-06 | hypomethylated |
| cg20735682 | 0.81235 | 0.68230973  | -0.251675 | 0.000805 | hypomethylated |
| cg15807143 | 0.82111 | 0.689622162 | -0.251769 | 0.000613 | hypomethylated |
| cg08866633 | 0.7457  | 0.626255676 | -0.251844 | 5.45E-05 | hypomethylated |
| cg19914238 | 0.89007 | 0.747496216 | -0.251853 | 7.84E-05 | hypomethylated |
| cg08222053 | 0.86203 | 0.723899459 | -0.251949 | 9.60E-05 | hypomethylated |
| cg12533206 | 0.74394 | 0.624719459 | -0.251978 | 0.000495 | hypomethylated |
| cg03724728 | 0.89022 | 0.747550811 | -0.25199  | 1.50E-05 | hypomethylated |
| cg10551058 | 0.73852 | 0.62016     | -0.251997 | 2.89E-05 | hypomethylated |
| cg02975953 | 0.77214 | 0.6483      | -0.252201 | 0.000178 | hypomethylated |
| cg11585942 | 0.8419  | 0.706854054 | -0.252237 | 0.000209 | hypomethylated |
| cg25884442 | 0.59861 | 0.502567568 | -0.252299 | 0.000511 | hypomethylated |
| cg02896757 | 0.8583  | 0.720561622 | -0.25236  | 0.000268 | hypomethylated |
| cg02663496 | 0.82341 | 0.691248108 | -0.252407 | 2.39E-05 | hypomethylated |
| cg23185751 | 0.87071 | 0.73089027  | -0.252537 | 2.67E-05 | hypomethylated |
| cg03023935 | 0.94284 | 0.791435135 | -0.252542 | 4.12E-06 | hypomethylated |
| cg03977174 | 0.86015 | 0.722011351 | -0.252567 | 4.26E-05 | hypomethylated |
| cg05746370 | 0.88221 | 0.740442703 | -0.252734 | 9.31E-06 | hypomethylated |
| cg20775109 | 0.81574 | 0.68462973  | -0.252785 | 2.48E-05 | hypomethylated |
| cg08017202 | 0.85509 | 0.717601081 | -0.252894 | 1.46E-05 | hypomethylated |

|            |         |             |           |          |                |
|------------|---------|-------------|-----------|----------|----------------|
| cg10173075 | 0.88928 | 0.746272973 | -0.252934 | 0.000126 | hypomethylated |
| cg08578212 | 0.65463 | 0.549303784 | -0.253075 | 0.000155 | hypomethylated |
| cg16569813 | 0.79674 | 0.668512973 | -0.253153 | 0.00032  | hypomethylated |
| cg20894936 | 0.73673 | 0.618158378 | -0.253159 | 0.001481 | hypomethylated |
| cg15367000 | 0.82799 | 0.694725946 | -0.253169 | 0.000155 | hypomethylated |
| cg08549241 | 0.82109 | 0.688922162 | -0.253199 | 0.001821 | hypomethylated |
| cg22808839 | 0.84174 | 0.706200541 | -0.253297 | 0.000342 | hypomethylated |
| cg26777475 | 0.79154 | 0.664079459 | -0.253306 | 0.00071  | hypomethylated |
| cg23514211 | 0.63631 | 0.533781622 | -0.25348  | 0.000271 | hypomethylated |
| cg22941178 | 0.79584 | 0.667603243 | -0.253487 | 3.07E-05 | hypomethylated |
| cg18669789 | 0.77444 | 0.649552432 | -0.253707 | 2.61E-05 | hypomethylated |
| cg12015615 | 0.8347  | 0.700037838 | -0.253825 | 3.57E-05 | hypomethylated |
| cg23106115 | 0.62402 | 0.523274054 | -0.254026 | 0.00024  | hypomethylated |
| cg14228788 | 0.84985 | 0.712643243 | -0.254028 | 2.07E-05 | hypomethylated |
| cg09554596 | 0.81906 | 0.686788649 | -0.254103 | 0.000148 | hypomethylated |
| cg08737815 | 0.91275 | 0.765119459 | -0.254535 | 2.45E-05 | hypomethylated |
| cg14479301 | 0.83781 | 0.702258378 | -0.254621 | 0.000109 | hypomethylated |
| cg24859986 | 0.90617 | 0.759547027 | -0.254642 | 2.32E-05 | hypomethylated |
| cg06528773 | 0.69587 | 0.583264865 | -0.254667 | 3.69E-06 | hypomethylated |
| cg16243195 | 0.65632 | 0.550112432 | -0.254673 | 0.000681 | hypomethylated |
| cg25890936 | 0.80942 | 0.678412432 | -0.254726 | 7.47E-05 | hypomethylated |
| cg22760037 | 0.86483 | 0.724837297 | -0.254759 | 1.37E-05 | hypomethylated |
| cg03807919 | 0.77576 | 0.65012973  | -0.254883 | 3.07E-05 | hypomethylated |
| cg07694735 | 0.84373 | 0.707074054 | -0.25492  | 0.000109 | hypomethylated |
| cg03466598 | 0.87878 | 0.73638973  | -0.255033 | 8.84E-05 | hypomethylated |
| cg22524332 | 0.85792 | 0.718857297 | -0.255138 | 9.72E-05 | hypomethylated |
| cg03995533 | 0.76771 | 0.643244865 | -0.255193 | 0.001541 | hypomethylated |
| cg08776942 | 0.88268 | 0.739563784 | -0.255216 | 1.42E-05 | hypomethylated |
| cg02964434 | 0.76555 | 0.641391351 | -0.255292 | 0.00039  | hypomethylated |
| cg00437969 | 0.90296 | 0.756508649 | -0.255306 | 6.75E-06 | hypomethylated |
| cg04811534 | 0.8961  | 0.750629189 | -0.255559 | 1.21E-05 | hypomethylated |
| cg07536328 | 0.87757 | 0.735083243 | -0.255607 | 4.15E-05 | hypomethylated |
| cg11789371 | 0.85034 | 0.71218     | -0.255798 | 0.000157 | hypomethylated |
| cg07205883 | 0.84589 | 0.708446486 | -0.255811 | 0.000117 | hypomethylated |
| cg15132165 | 0.79687 | 0.667345405 | -0.255911 | 0.00071  | hypomethylated |
| cg24584161 | 0.87808 | 0.735265946 | -0.256086 | 1.46E-05 | hypomethylated |
| cg01870519 | 0.77921 | 0.652434054 | -0.25618  | 0.00017  | hypomethylated |
| cg07047963 | 0.66794 | 0.559234054 | -0.256266 | 0.000204 | hypomethylated |
| cg18917486 | 0.76613 | 0.641435135 | -0.256286 | 0.001262 | hypomethylated |
| cg18575863 | 0.80893 | 0.677190811 | -0.256452 | 0.001803 | hypomethylated |
| cg00972420 | 0.79164 | 0.66271027  | -0.256466 | 0.000426 | hypomethylated |
| cg22160735 | 0.78103 | 0.653824865 | -0.256474 | 0.000159 | hypomethylated |
| cg23042540 | 0.85002 | 0.711543243 | -0.256545 | 1.89E-05 | hypomethylated |
| cg15643000 | 0.77916 | 0.652217838 | -0.256566 | 0.000109 | hypomethylated |
| cg09951201 | 0.83233 | 0.696674595 | -0.256671 | 0.000135 | hypomethylated |
| cg19282443 | 0.85323 | 0.714156757 | -0.256694 | 0.00013  | hypomethylated |
| cg18767057 | 0.73422 | 0.614331892 | -0.257194 | 0.000204 | hypomethylated |
| cg04143805 | 0.84339 | 0.705661622 | -0.257223 | 6.78E-05 | hypomethylated |
| cg09230763 | 0.71721 | 0.600077297 | -0.257247 | 0.000399 | hypomethylated |
| cg22511889 | 0.74862 | 0.626356757 | -0.257249 | 0.000112 | hypomethylated |
| cg12618270 | 0.82783 | 0.692615676 | -0.257279 | 0.000417 | hypomethylated |
| cg25191304 | 0.92016 | 0.769799459 | -0.257402 | 5.58E-06 | hypomethylated |
| cg06807837 | 0.87898 | 0.735335135 | -0.257428 | 2.45E-05 | hypomethylated |
| cg08508777 | 0.7458  | 0.623905946 | -0.25746  | 2.21E-05 | hypomethylated |
| cg18509719 | 0.93324 | 0.780648108 | -0.257576 | 2.74E-05 | hypomethylated |
| cg05265143 | 0.83687 | 0.700017838 | -0.257612 | 0.000115 | hypomethylated |
| cg11502921 | 0.70701 | 0.591315135 | -0.257803 | 0.000148 | hypomethylated |
| cg25473115 | 0.87844 | 0.734672432 | -0.257843 | 4.47E-05 | hypomethylated |

|            |         |             |           |          |                |
|------------|---------|-------------|-----------|----------|----------------|
| cg07596106 | 0.76673 | 0.641160541 | -0.258033 | 0.000193 | hypomethylated |
| cg02370644 | 0.85235 | 0.712754595 | -0.258041 | 8.42E-05 | hypomethylated |
| cg19204958 | 0.81945 | 0.68523027  | -0.258067 | 0.001052 | hypomethylated |
| cg12216688 | 0.75982 | 0.635341081 | -0.258126 | 0.000111 | hypomethylated |
| cg01410415 | 0.70607 | 0.590390811 | -0.258141 | 3.95E-05 | hypomethylated |
| cg20161227 | 0.88658 | 0.741318919 | -0.258156 | 6.62E-05 | hypomethylated |
| cg04390004 | 0.77532 | 0.648205946 | -0.25834  | 0.000178 | hypomethylated |
| cg19927741 | 0.72069 | 0.60238973  | -0.258682 | 0.000607 | hypomethylated |
| cg18885372 | 0.82207 | 0.687098378 | -0.258745 | 0.000313 | hypomethylated |
| cg07457213 | 0.71491 | 0.597531892 | -0.258746 | 0.000245 | hypomethylated |
| cg23313266 | 0.78007 | 0.651915676 | -0.258918 | 0.000113 | hypomethylated |
| cg10967176 | 0.89395 | 0.746987027 | -0.259111 | 6.31E-05 | hypomethylated |
| cg04142080 | 0.78539 | 0.656150811 | -0.259382 | 1.30E-05 | hypomethylated |
| cg07757885 | 0.72927 | 0.609243243 | -0.259435 | 0.0002   | hypomethylated |
| cg09586198 | 0.79969 | 0.668001081 | -0.25959  | 0.000306 | hypomethylated |
| cg18642576 | 0.89269 | 0.745584324 | -0.259788 | 4.15E-05 | hypomethylated |
| cg26869512 | 0.93942 | 0.784598378 | -0.259816 | 1.39E-06 | hypomethylated |
| cg12791245 | 0.81908 | 0.684076757 | -0.259846 | 1.89E-05 | hypomethylated |
| cg25980489 | 0.88162 | 0.736297838 | -0.259867 | 1.18E-05 | hypomethylated |
| cg20808693 | 0.72574 | 0.606074595 | -0.259957 | 0.000207 | hypomethylated |
| cg02135122 | 0.88003 | 0.73492     | -0.259965 | 5.65E-05 | hypomethylated |
| cg01297744 | 0.86471 | 0.722111351 | -0.259995 | 0.00013  | hypomethylated |
| cg10095654 | 0.69014 | 0.576256216 | -0.260179 | 0.000219 | hypomethylated |
| cg20012366 | 0.62255 | 0.519796757 | -0.260242 | 0.001768 | hypomethylated |
| cg06924873 | 0.81132 | 0.677407027 | -0.260248 | 0.000245 | hypomethylated |
| cg03033344 | 0.83478 | 0.696984865 | -0.260269 | 1.50E-05 | hypomethylated |
| cg20933326 | 0.81166 | 0.677667568 | -0.260298 | 9.82E-06 | hypomethylated |
| cg07708016 | 0.83267 | 0.695200541 | -0.260316 | 4.82E-05 | hypomethylated |
| cg01396138 | 0.84037 | 0.701609189 | -0.260357 | 1.56E-05 | hypomethylated |
| cg14011229 | 0.85385 | 0.712858919 | -0.260366 | 0.000216 | hypomethylated |
| cg08486432 | 0.8561  | 0.714582703 | -0.260678 | 4.48E-06 | hypomethylated |
| cg13298167 | 0.81225 | 0.677922703 | -0.260803 | 0.000234 | hypomethylated |
| cg09847652 | 0.85793 | 0.71602     | -0.26086  | 3.04E-05 | hypomethylated |
| cg22114568 | 0.85936 | 0.717212973 | -0.260861 | 4.82E-05 | hypomethylated |
| cg01931222 | 0.80299 | 0.670083243 | -0.261042 | 0.000511 | hypomethylated |
| cg18960218 | 0.76433 | 0.637803243 | -0.261084 | 0.000365 | hypomethylated |
| cg21911100 | 0.77894 | 0.649971351 | -0.261136 | 3.95E-05 | hypomethylated |
| cg11569478 | 0.88827 | 0.741164324 | -0.261205 | 4.36E-05 | hypomethylated |
| cg22331032 | 0.73811 | 0.615843784 | -0.261271 | 0.000335 | hypomethylated |
| cg13333107 | 0.8895  | 0.742142703 | -0.261298 | 3.67E-05 | hypomethylated |
| cg19290938 | 0.8275  | 0.690357838 | -0.261415 | 7.75E-05 | hypomethylated |
| cg09944616 | 0.75449 | 0.629446486 | -0.261418 | 5.00E-05 | hypomethylated |
| cg21836117 | 0.79001 | 0.659075676 | -0.261427 | 0.000138 | hypomethylated |
| cg22218316 | 0.81726 | 0.681802703 | -0.261441 | 8.63E-05 | hypomethylated |
| cg07546508 | 0.74186 | 0.618865946 | -0.26152  | 2.42E-05 | hypomethylated |
| cg11664544 | 0.77008 | 0.642398919 | -0.261539 | 0.00044  | hypomethylated |
| cg21545013 | 0.78897 | 0.658154054 | -0.261545 | 0.000155 | hypomethylated |
| cg09508189 | 0.79661 | 0.664391892 | -0.261839 | 0.000112 | hypomethylated |
| cg13000789 | 0.84194 | 0.702127027 | -0.261985 | 0.000148 | hypomethylated |
| cg06738379 | 0.79412 | 0.662169189 | -0.262157 | 0.000219 | hypomethylated |
| cg24109934 | 0.74987 | 0.625247568 | -0.262213 | 1.84E-05 | hypomethylated |
| cg14384283 | 0.77991 | 0.650288649 | -0.262227 | 0.000265 | hypomethylated |
| cg12871463 | 0.77168 | 0.643354595 | -0.262389 | 0.000219 | hypomethylated |
| cg21900928 | 0.8121  | 0.677000541 | -0.2625   | 0.000168 | hypomethylated |
| cg08629176 | 0.76248 | 0.635626486 | -0.26252  | 0.0003   | hypomethylated |
| cg01451604 | 0.801   | 0.667732432 | -0.262532 | 0.000653 | hypomethylated |
| cg00065226 | 0.92805 | 0.773593514 | -0.262627 | 1.46E-05 | hypomethylated |
| cg10997190 | 0.88916 | 0.741160541 | -0.262657 | 3.95E-05 | hypomethylated |

|            |         |             |           |          |                |
|------------|---------|-------------|-----------|----------|----------------|
| cg02400595 | 0.89061 | 0.742292432 | -0.262806 | 1.75E-05 | hypomethylated |
| cg06720949 | 0.77702 | 0.647594054 | -0.262862 | 0.000262 | hypomethylated |
| cg21208107 | 0.89764 | 0.748115135 | -0.262877 | 2.36E-06 | hypomethylated |
| cg15763121 | 0.79761 | 0.664745946 | -0.26288  | 3.85E-05 | hypomethylated |
| cg26899496 | 0.88158 | 0.734695676 | -0.262945 | 1.20E-05 | hypomethylated |
| cg23402920 | 0.86748 | 0.722867568 | -0.263099 | 2.51E-05 | hypomethylated |
| cg14036828 | 0.90527 | 0.754343243 | -0.263127 | 9.38E-05 | hypomethylated |
| cg19072957 | 0.87031 | 0.725202703 | -0.263145 | 0.000112 | hypomethylated |
| cg22272492 | 0.82421 | 0.686776216 | -0.263172 | 3.67E-05 | hypomethylated |
| cg04225554 | 0.75726 | 0.630958378 | -0.263244 | 7.12E-06 | hypomethylated |
| cg21218627 | 0.85973 | 0.716257838 | -0.263405 | 1.94E-05 | hypomethylated |
| cg23882164 | 0.78176 | 0.651272973 | -0.263463 | 0.000132 | hypomethylated |
| cg27359629 | 0.86758 | 0.722747568 | -0.263505 | 2.04E-05 | hypomethylated |
| cg16678564 | 0.85409 | 0.711488649 | -0.263547 | 0.000495 | hypomethylated |
| cg00890145 | 0.67899 | 0.56558973  | -0.263634 | 0.00044  | hypomethylated |
| cg07244783 | 0.9082  | 0.756471351 | -0.263725 | 2.53E-06 | hypomethylated |
| cg22285671 | 0.70598 | 0.58802973  | -0.263738 | 0.000741 | hypomethylated |
| cg10627703 | 0.93249 | 0.776671351 | -0.263784 | 2.74E-05 | hypomethylated |
| cg07219425 | 0.81461 | 0.678411892 | -0.263948 | 0.000232 | hypomethylated |
| cg04508312 | 0.69482 | 0.578629189 | -0.264    | 0.000174 | hypomethylated |
| cg23795082 | 0.8601  | 0.716164865 | -0.264213 | 0.000126 | hypomethylated |
| cg05556202 | 0.79422 | 0.661236216 | -0.264373 | 0.000178 | hypomethylated |
| cg07444554 | 0.85967 | 0.715721081 | -0.264385 | 8.60E-06 | hypomethylated |
| cg12019893 | 0.84033 | 0.699574054 | -0.264479 | 0.000789 | hypomethylated |
| cg11547696 | 0.76332 | 0.635443243 | -0.264525 | 0.000884 | hypomethylated |
| cg27114782 | 0.77667 | 0.64654     | -0.264562 | 0.002274 | hypomethylated |
| cg15320059 | 0.81159 | 0.675596216 | -0.26459  | 1.89E-05 | hypomethylated |
| cg19364141 | 0.91109 | 0.758413514 | -0.264609 | 8.15E-06 | hypomethylated |
| cg21767759 | 0.55719 | 0.463796757 | -0.264677 | 0.000581 | hypomethylated |
| cg06106510 | 0.87525 | 0.728475135 | -0.264815 | 3.76E-05 | hypomethylated |
| cg06171971 | 0.64795 | 0.539272432 | -0.264868 | 0.000234 | hypomethylated |
| cg23731501 | 0.80726 | 0.671851351 | -0.264891 | 0.000148 | hypomethylated |
| cg00119314 | 0.68841 | 0.572876757 | -0.265043 | 0.000161 | hypomethylated |
| cg25316305 | 0.89934 | 0.748402703 | -0.265052 | 2.42E-05 | hypomethylated |
| cg14288399 | 0.79698 | 0.663172432 | -0.265159 | 0.000166 | hypomethylated |
| cg04607671 | 0.78783 | 0.655531892 | -0.265218 | 0.000214 | hypomethylated |
| cg10888811 | 0.74507 | 0.619892432 | -0.265358 | 0.000202 | hypomethylated |
| cg21646032 | 0.82888 | 0.689545946 | -0.265517 | 0.000653 | hypomethylated |
| cg14215515 | 0.79473 | 0.661023784 | -0.265763 | 4.64E-05 | hypomethylated |
| cg08423142 | 0.77751 | 0.646682162 | -0.265804 | 0.001118 | hypomethylated |
| cg07034563 | 0.87658 | 0.728984324 | -0.265998 | 2.81E-05 | hypomethylated |
| cg27093376 | 0.81368 | 0.676663243 | -0.266024 | 5.00E-05 | hypomethylated |
| cg02202742 | 0.78439 | 0.652296757 | -0.266043 | 0.000338 | hypomethylated |
| cg14409104 | 0.93048 | 0.773691351 | -0.266217 | 2.10E-05 | hypomethylated |
| cg20666186 | 0.81312 | 0.676051351 | -0.266335 | 0.000135 | hypomethylated |
| cg13481776 | 0.80158 | 0.666414595 | -0.266427 | 0.000653 | hypomethylated |
| cg06349754 | 0.88924 | 0.739274054 | -0.266464 | 1.39E-06 | hypomethylated |
| cg27460531 | 0.74446 | 0.618892973 | -0.266504 | 0.000435 | hypomethylated |
| cg10260711 | 0.82625 | 0.686878378 | -0.266524 | 0.000187 | hypomethylated |
| cg00328210 | 0.87561 | 0.727797297 | -0.266752 | 8.84E-05 | hypomethylated |
| cg10343327 | 0.89216 | 0.741531351 | -0.266795 | 3.44E-05 | hypomethylated |
| cg15988204 | 0.70355 | 0.584727027 | -0.26689  | 0.000445 | hypomethylated |
| cg15705203 | 0.7474  | 0.621152432 | -0.266933 | 0.000123 | hypomethylated |
| cg09354263 | 0.73814 | 0.613381622 | -0.26711  | 0.000185 | hypomethylated |
| cg05418495 | 0.81067 | 0.673600541 | -0.267221 | 9.49E-05 | hypomethylated |
| cg13223043 | 0.76925 | 0.639078919 | -0.267458 | 0.000369 | hypomethylated |
| cg16827257 | 0.88427 | 0.734583784 | -0.26756  | 8.22E-05 | hypomethylated |
| cg03251852 | 0.85864 | 0.71328     | -0.267585 | 4.36E-05 | hypomethylated |

|            |         |             |           |          |                |
|------------|---------|-------------|-----------|----------|----------------|
| cg07324245 | 0.66722 | 0.554239459 | -0.267653 | 0.000256 | hypomethylated |
| cg26904179 | 0.82187 | 0.682663243 | -0.267736 | 5.58E-06 | hypomethylated |
| cg00130778 | 0.73543 | 0.610844865 | -0.267782 | 0.000696 | hypomethylated |
| cg13127574 | 0.87562 | 0.727253514 | -0.267847 | 5.58E-06 | hypomethylated |
| cg07290522 | 0.8122  | 0.674573514 | -0.267859 | 0.000382 | hypomethylated |
| cg14289738 | 0.85196 | 0.70757027  | -0.267912 | 9.96E-06 | hypomethylated |
| cg22785170 | 0.88368 | 0.733902162 | -0.267936 | 1.18E-05 | hypomethylated |
| cg02518338 | 0.90026 | 0.747646486 | -0.267985 | 8.32E-05 | hypomethylated |
| cg09162518 | 0.89081 | 0.739688108 | -0.268201 | 7.52E-06 | hypomethylated |
| cg21372107 | 0.7936  | 0.658903243 | -0.268345 | 8.42E-05 | hypomethylated |
| cg14436231 | 0.7812  | 0.648604324 | -0.268353 | 0.000756 | hypomethylated |
| cg25268100 | 0.73438 | 0.609718919 | -0.268382 | 0.000674 | hypomethylated |
| cg05739379 | 0.83877 | 0.696337838 | -0.268488 | 0.000209 | hypomethylated |
| cg03357952 | 0.74933 | 0.622074595 | -0.268514 | 0.00097  | hypomethylated |
| cg19823504 | 0.8513  | 0.706726486 | -0.268516 | 1.66E-05 | hypomethylated |
| cg03879971 | 0.86536 | 0.718372432 | -0.268568 | 8.42E-05 | hypomethylated |
| cg03302135 | 0.68559 | 0.569137297 | -0.268569 | 0.000221 | hypomethylated |
| cg08837481 | 0.88794 | 0.737060541 | -0.268679 | 4.47E-05 | hypomethylated |
| cg24730307 | 0.86942 | 0.721635676 | -0.268783 | 2.92E-05 | hypomethylated |
| cg09916599 | 0.79856 | 0.662772432 | -0.268887 | 0.000102 | hypomethylated |
| cg14590214 | 0.92471 | 0.767444324 | -0.268939 | 1.01E-05 | hypomethylated |
| cg18461436 | 0.86633 | 0.718887568 | -0.269151 | 1.58E-05 | hypomethylated |
| cg11705208 | 0.76084 | 0.631325946 | -0.269208 | 0.000135 | hypomethylated |
| cg10114235 | 0.83873 | 0.695948649 | -0.269226 | 5.45E-05 | hypomethylated |
| cg13250566 | 0.79274 | 0.65778     | -0.269243 | 0.000219 | hypomethylated |
| cg27485075 | 0.75569 | 0.626941081 | -0.269465 | 0.001768 | hypomethylated |
| cg09126794 | 0.87411 | 0.725128108 | -0.269579 | 4.36E-05 | hypomethylated |
| cg18269382 | 0.82684 | 0.685874595 | -0.269663 | 0.000142 | hypomethylated |
| cg18099423 | 0.8565  | 0.710471892 | -0.269676 | 9.49E-05 | hypomethylated |
| cg04519626 | 0.83179 | 0.689959459 | -0.269708 | 5.93E-05 | hypomethylated |
| cg09344098 | 0.66637 | 0.552724324 | -0.269763 | 1.75E-05 | hypomethylated |
| cg03025880 | 0.79013 | 0.655365946 | -0.269789 | 0.000365 | hypomethylated |
| cg03774957 | 0.85365 | 0.707981622 | -0.269933 | 0.000681 | hypomethylated |
| cg09218398 | 0.96437 | 0.799792973 | -0.26996  | 3.69E-06 | hypomethylated |
| cg22906553 | 0.87101 | 0.722350811 | -0.26999  | 3.85E-05 | hypomethylated |
| cg09873544 | 0.71679 | 0.59442973  | -0.270044 | 0.000358 | hypomethylated |
| cg07372450 | 0.89116 | 0.739004865 | -0.270101 | 5.19E-05 | hypomethylated |
| cg15095427 | 0.86436 | 0.716772432 | -0.270117 | 6.22E-06 | hypomethylated |
| cg15407213 | 0.82513 | 0.68422     | -0.270161 | 4.36E-05 | hypomethylated |
| cg07053162 | 0.85024 | 0.704951892 | -0.270345 | 0.000117 | hypomethylated |
| cg26193418 | 0.84409 | 0.699833514 | -0.270385 | 4.82E-05 | hypomethylated |
| cg10461261 | 0.83237 | 0.690088108 | -0.270444 | 0.000132 | hypomethylated |
| cg03862705 | 0.66389 | 0.550398919 | -0.270467 | 0.005757 | hypomethylated |
| cg22451100 | 0.88782 | 0.736031351 | -0.2705   | 3.12E-06 | hypomethylated |
| cg13466409 | 0.88873 | 0.736764865 | -0.270541 | 3.15E-05 | hypomethylated |
| cg15010372 | 0.8075  | 0.669404324 | -0.270584 | 1.77E-05 | hypomethylated |
| cg11690983 | 0.90154 | 0.747358378 | -0.270591 | 1.99E-05 | hypomethylated |
| cg12701088 | 0.51706 | 0.428628649 | -0.270603 | 0.000581 | hypomethylated |
| cg08290756 | 0.90379 | 0.749207027 | -0.270623 | 4.36E-06 | hypomethylated |
| cg01955025 | 0.85536 | 0.709057838 | -0.270628 | 6.86E-05 | hypomethylated |
| cg26303613 | 0.79681 | 0.660497838 | -0.270682 | 0.000132 | hypomethylated |
| cg26955287 | 0.89871 | 0.744907027 | -0.270795 | 2.53E-06 | hypomethylated |
| cg03403081 | 0.87535 | 0.725482162 | -0.27092  | 9.07E-06 | hypomethylated |
| cg10343364 | 0.78481 | 0.650437838 | -0.270932 | 0.001368 | hypomethylated |
| cg03750525 | 0.73186 | 0.60652973  | -0.270989 | 0.00024  | hypomethylated |
| cg02850715 | 0.75779 | 0.627943243 | -0.271164 | 0.000123 | hypomethylated |
| cg07681739 | 0.82999 | 0.687715676 | -0.271282 | 5.31E-05 | hypomethylated |
| cg00245890 | 0.79608 | 0.659616757 | -0.271285 | 0.000253 | hypomethylated |

|            |         |             |           |          |                |
|------------|---------|-------------|-----------|----------|----------------|
| cg14157052 | 0.93652 | 0.775956216 | -0.271335 | 1.82E-06 | hypomethylated |
| cg23894948 | 0.66158 | 0.548148108 | -0.27135  | 0.000594 | hypomethylated |
| cg12164955 | 0.89828 | 0.744216216 | -0.271443 | 4.70E-05 | hypomethylated |
| cg24327877 | 0.87389 | 0.723996216 | -0.27147  | 1.46E-05 | hypomethylated |
| cg08963118 | 0.82499 | 0.683463784 | -0.271512 | 4.05E-05 | hypomethylated |
| cg21910673 | 0.71382 | 0.591321081 | -0.271619 | 0.001803 | hypomethylated |
| cg24685109 | 0.83056 | 0.688019459 | -0.271635 | 4.54E-06 | hypomethylated |
| cg20890440 | 0.83537 | 0.691982162 | -0.27168  | 0.000277 | hypomethylated |
| cg25567805 | 0.83726 | 0.693532432 | -0.271712 | 0.000653 | hypomethylated |
| cg08785524 | 0.88863 | 0.736039459 | -0.2718   | 6.05E-06 | hypomethylated |
| cg26300500 | 0.87369 | 0.723664324 | -0.271801 | 4.48E-06 | hypomethylated |
| cg07516712 | 0.91596 | 0.758476757 | -0.27218  | 1.54E-05 | hypomethylated |
| cg27050818 | 0.85295 | 0.706216757 | -0.27235  | 7.32E-06 | hypomethylated |
| cg20686001 | 0.75017 | 0.621091351 | -0.272412 | 0.000101 | hypomethylated |
| cg19716073 | 0.78678 | 0.651351351 | -0.272524 | 0.0003   | hypomethylated |
| cg25162533 | 0.74031 | 0.612788649 | -0.27274  | 0.000159 | hypomethylated |
| cg06263178 | 0.82538 | 0.683116757 | -0.272926 | 0.0003   | hypomethylated |
| cg18109186 | 0.87342 | 0.722847568 | -0.272984 | 4.86E-06 | hypomethylated |
| cg04870732 | 0.86983 | 0.719864324 | -0.273008 | 3.49E-05 | hypomethylated |
| cg17140191 | 0.75355 | 0.623621081 | -0.273034 | 5.32E-05 | hypomethylated |
| cg01171456 | 0.84479 | 0.699124324 | -0.273044 | 2.38E-05 | hypomethylated |
| cg27526892 | 0.88582 | 0.733044865 | -0.273112 | 1.73E-05 | hypomethylated |
| cg09368716 | 0.78836 | 0.652333514 | -0.273245 | 0.000358 | hypomethylated |
| cg16450654 | 0.79244 | 0.655660541 | -0.273353 | 6.78E-05 | hypomethylated |
| cg13580107 | 0.73124 | 0.604839459 | -0.273793 | 6.01E-05 | hypomethylated |
| cg17968946 | 0.90311 | 0.746948649 | -0.273893 | 4.73E-06 | hypomethylated |
| cg14647877 | 0.87049 | 0.719966486 | -0.273898 | 0.000103 | hypomethylated |
| cg27180974 | 0.8538  | 0.706147568 | -0.273928 | 9.72E-05 | hypomethylated |
| cg00283986 | 0.70622 | 0.584059459 | -0.274002 | 0.000485 | hypomethylated |
| cg10640398 | 0.79814 | 0.660062162 | -0.27404  | 0.000399 | hypomethylated |
| cg19022978 | 0.88104 | 0.728543784 | -0.274192 | 5.06E-05 | hypomethylated |
| cg20303033 | 0.62005 | 0.512724324 | -0.274201 | 0.001176 | hypomethylated |
| cg26275110 | 0.64563 | 0.533837297 | -0.274308 | 0.000426 | hypomethylated |
| cg22392793 | 0.76336 | 0.631112973 | -0.274465 | 0.00049  | hypomethylated |
| cg18815565 | 0.90812 | 0.750778378 | -0.274496 | 5.43E-06 | hypomethylated |
| cg01548456 | 0.87913 | 0.726807027 | -0.274504 | 1.04E-05 | hypomethylated |
| cg22276227 | 0.79078 | 0.653696757 | -0.274655 | 3.57E-05 | hypomethylated |
| cg12042787 | 0.62046 | 0.512883243 | -0.274708 | 6.86E-05 | hypomethylated |
| cg12734688 | 0.86204 | 0.712574595 | -0.274714 | 4.80E-06 | hypomethylated |
| cg10960354 | 0.84888 | 0.701636757 | -0.274836 | 1.77E-05 | hypomethylated |
| cg06071334 | 0.73911 | 0.610878919 | -0.274903 | 3.90E-05 | hypomethylated |
| cg05885462 | 0.88934 | 0.735007568 | -0.274976 | 3.57E-05 | hypomethylated |
| cg24619694 | 0.81199 | 0.671075676 | -0.274986 | 1.87E-05 | hypomethylated |
| cg08626653 | 0.78634 | 0.649856216 | -0.275033 | 7.38E-05 | hypomethylated |
| cg25380464 | 0.92957 | 0.768127027 | -0.275219 | 4.30E-06 | hypomethylated |
| cg14294658 | 0.68552 | 0.566447568 | -0.275256 | 0.001031 | hypomethylated |
| cg27478579 | 0.74526 | 0.615801081 | -0.275279 | 0.000224 | hypomethylated |
| cg08317252 | 0.5555  | 0.458999459 | -0.275294 | 0.000124 | hypomethylated |
| cg08155908 | 0.84088 | 0.6948      | -0.275302 | 0.000251 | hypomethylated |
| cg08940490 | 0.65689 | 0.542731892 | -0.275412 | 0.006679 | hypomethylated |
| cg14662210 | 0.86734 | 0.716429189 | -0.275774 | 5.45E-05 | hypomethylated |
| cg25520440 | 0.70216 | 0.579980541 | -0.275795 | 0.00043  | hypomethylated |
| cg01172082 | 0.76765 | 0.634064865 | -0.275818 | 0.000138 | hypomethylated |
| cg26516710 | 0.87805 | 0.725234595 | -0.275855 | 0.0003   | hypomethylated |
| cg08205236 | 0.66017 | 0.545202703 | -0.276045 | 0.00039  | hypomethylated |
| cg06782350 | 0.75805 | 0.626028108 | -0.276066 | 0.000127 | hypomethylated |
| cg20781516 | 0.81144 | 0.67011027  | -0.276086 | 5.86E-05 | hypomethylated |
| cg05131646 | 0.62683 | 0.517585946 | -0.276276 | 0.001409 | hypomethylated |

|            |         |             |           |          |                |
|------------|---------|-------------|-----------|----------|----------------|
| cg00543840 | 0.89868 | 0.742042703 | -0.276305 | 9.07E-06 | hypomethylated |
| cg10572659 | 0.82328 | 0.679734054 | -0.276413 | 5.65E-06 | hypomethylated |
| cg12710538 | 0.65061 | 0.537163243 | -0.276432 | 0.000237 | hypomethylated |
| cg26687381 | 0.90834 | 0.749881081 | -0.276571 | 1.62E-05 | hypomethylated |
| cg14492992 | 0.78058 | 0.644352432 | -0.276697 | 0.003441 | hypomethylated |
| cg03528302 | 0.7938  | 0.655248108 | -0.276734 | 0.00017  | hypomethylated |
| cg07312312 | 0.89849 | 0.741644865 | -0.276774 | 1.23E-05 | hypomethylated |
| cg26710371 | 0.78842 | 0.650777838 | -0.276799 | 0.00017  | hypomethylated |
| cg10853533 | 0.78821 | 0.650574054 | -0.276867 | 4.86E-06 | hypomethylated |
| cg06872381 | 0.72213 | 0.596023784 | -0.276889 | 0.00028  | hypomethylated |
| cg24771152 | 0.97262 | 0.802739459 | -0.276944 | 9.69E-06 | hypomethylated |
| cg20215290 | 0.92403 | 0.762559459 | -0.27709  | 1.24E-06 | hypomethylated |
| cg15105060 | 0.81605 | 0.673428649 | -0.277132 | 7.62E-06 | hypomethylated |
| cg07600170 | 0.94779 | 0.782078378 | -0.277254 | 6.13E-06 | hypomethylated |
| cg18597991 | 0.86723 | 0.715578919 | -0.277304 | 0.000132 | hypomethylated |
| cg01856892 | 0.78094 | 0.644341081 | -0.277387 | 0.001074 | hypomethylated |
| cg01800297 | 0.79049 | 0.652102703 | -0.277648 | 0.000157 | hypomethylated |
| cg07005654 | 0.67426 | 0.556175135 | -0.277766 | 0.002147 | hypomethylated |
| cg15070897 | 0.7703  | 0.635355135 | -0.277857 | 0.003441 | hypomethylated |
| cg17821664 | 0.74013 | 0.610464324 | -0.277872 | 0.000147 | hypomethylated |
| cg06314202 | 0.6558  | 0.540898378 | -0.277898 | 4.36E-05 | hypomethylated |
| cg19381819 | 0.7261  | 0.598826486 | -0.27803  | 2.04E-05 | hypomethylated |
| cg19997245 | 0.87278 | 0.719748108 | -0.278126 | 6.08E-05 | hypomethylated |
| cg24616382 | 0.85869 | 0.708088108 | -0.278209 | 4.94E-05 | hypomethylated |
| cg23793599 | 0.90303 | 0.744604865 | -0.278299 | 1.33E-05 | hypomethylated |
| cg22224043 | 0.76553 | 0.631226486 | -0.278301 | 0.000293 | hypomethylated |
| cg24493649 | 0.90353 | 0.745002162 | -0.278328 | 6.75E-06 | hypomethylated |
| cg03549739 | 0.74671 | 0.615669189 | -0.278393 | 0.000718 | hypomethylated |
| cg14025883 | 0.83911 | 0.691796216 | -0.278513 | 7.72E-06 | hypomethylated |
| cg11093373 | 0.81072 | 0.668362162 | -0.278574 | 4.64E-05 | hypomethylated |
| cg14669515 | 0.73005 | 0.601735135 | -0.278867 | 0.001368 | hypomethylated |
| cg21853989 | 0.89196 | 0.735122703 | -0.278994 | 4.05E-05 | hypomethylated |
| cg22880933 | 0.70631 | 0.582055676 | -0.279144 | 9.07E-06 | hypomethylated |
| cg22235901 | 0.74083 | 0.610454595 | -0.279259 | 2.78E-05 | hypomethylated |
| cg24959938 | 0.84444 | 0.695807568 | -0.279307 | 3.49E-05 | hypomethylated |
| cg18834029 | 0.93356 | 0.769196757 | -0.27939  | 1.54E-05 | hypomethylated |
| cg14170793 | 0.84845 | 0.699016216 | -0.279504 | 5.00E-05 | hypomethylated |
| cg12443001 | 0.67643 | 0.557290811 | -0.27951  | 0.000134 | hypomethylated |
| cg06524377 | 0.71716 | 0.590843243 | -0.27952  | 0.000262 | hypomethylated |
| cg24836242 | 0.69404 | 0.571790811 | -0.279531 | 0.000132 | hypomethylated |
| cg06047778 | 0.85664 | 0.705730811 | -0.279571 | 6.15E-05 | hypomethylated |
| cg17536465 | 0.78486 | 0.646589189 | -0.279586 | 0.000454 | hypomethylated |
| cg23095729 | 0.7959  | 0.655572973 | -0.279831 | 0.000152 | hypomethylated |
| cg11464885 | 0.8015  | 0.660181622 | -0.27984  | 0.000185 | hypomethylated |
| cg26612409 | 0.84186 | 0.693374595 | -0.279945 | 7.12E-05 | hypomethylated |
| cg20435125 | 0.79235 | 0.652527568 | -0.280099 | 1.42E-05 | hypomethylated |
| cg19651003 | 0.87971 | 0.724468649 | -0.280105 | 0.0002   | hypomethylated |
| cg15208832 | 0.79491 | 0.654629189 | -0.280114 | 0.000268 | hypomethylated |
| cg00401456 | 0.91417 | 0.752818378 | -0.280161 | 2.21E-05 | hypomethylated |
| cg21581096 | 0.73614 | 0.606181622 | -0.28023  | 9.38E-05 | hypomethylated |
| cg15240733 | 0.60808 | 0.500722703 | -0.280249 | 0.000182 | hypomethylated |
| cg27214687 | 0.9429  | 0.776421081 | -0.280265 | 3.95E-05 | hypomethylated |
| cg27409401 | 0.92045 | 0.757917297 | -0.280299 | 1.46E-05 | hypomethylated |
| cg12931707 | 0.88958 | 0.732461081 | -0.280372 | 1.75E-05 | hypomethylated |
| cg17923377 | 0.62602 | 0.515401081 | -0.280513 | 0.004365 | hypomethylated |
| cg15578332 | 0.84875 | 0.698741622 | -0.280581 | 0.000274 | hypomethylated |
| cg03849851 | 0.85163 | 0.701102162 | -0.280602 | 5.19E-05 | hypomethylated |
| cg03469804 | 0.74078 | 0.609807027 | -0.280692 | 0.000772 | hypomethylated |

|            |         |             |           |          |                |
|------------|---------|-------------|-----------|----------|----------------|
| cg01470535 | 0.81343 | 0.669597838 | -0.280723 | 0.000102 | hypomethylated |
| cg25531857 | 0.69835 | 0.574835135 | -0.280802 | 0.00095  | hypomethylated |
| cg17838754 | 0.82947 | 0.682757297 | -0.280817 | 5.86E-05 | hypomethylated |
| cg05150973 | 0.85143 | 0.700804865 | -0.280875 | 6.23E-05 | hypomethylated |
| cg24743301 | 0.83747 | 0.68929027  | -0.280926 | 0.000725 | hypomethylated |
| cg14257263 | 0.7361  | 0.605813514 | -0.281028 | 9.16E-05 | hypomethylated |
| cg16790560 | 0.6733  | 0.554101081 | -0.2811   | 0.00043  | hypomethylated |
| cg25068071 | 0.74919 | 0.616507027 | -0.281214 | 0.000551 | hypomethylated |
| cg19991086 | 0.80602 | 0.663246486 | -0.281271 | 6.01E-05 | hypomethylated |
| cg07592216 | 0.75587 | 0.621964865 | -0.281305 | 0.000234 | hypomethylated |
| cg21790344 | 0.86271 | 0.709815676 | -0.281431 | 2.27E-05 | hypomethylated |
| cg06002157 | 0.84973 | 0.699046486 | -0.281616 | 1.65E-06 | hypomethylated |
| cg09075149 | 0.78295 | 0.643980541 | -0.281903 | 0.0006   | hypomethylated |
| cg16536740 | 0.70813 | 0.582414054 | -0.281969 | 0.000696 | hypomethylated |
| cg17282466 | 0.84211 | 0.692607568 | -0.281971 | 4.58E-05 | hypomethylated |
| cg07572233 | 0.78277 | 0.643773514 | -0.282035 | 0.000551 | hypomethylated |
| cg06097423 | 0.90904 | 0.747605946 | -0.282066 | 8.84E-07 | hypomethylated |
| cg06330587 | 0.6789  | 0.558322703 | -0.2821   | 0.000221 | hypomethylated |
| cg05318361 | 0.6566  | 0.539934054 | -0.282232 | 0.002674 | hypomethylated |
| cg06724409 | 0.78488 | 0.645363784 | -0.282359 | 0.000335 | hypomethylated |
| cg15601452 | 0.84059 | 0.691137838 | -0.282429 | 0.000265 | hypomethylated |
| cg19126910 | 0.70708 | 0.581327027 | -0.282523 | 0.003255 | hypomethylated |
| cg03162506 | 0.7654  | 0.629271351 | -0.282532 | 0.000331 | hypomethylated |
| cg24911198 | 0.72622 | 0.597044865 | -0.282567 | 0.001118 | hypomethylated |
| cg05426700 | 0.62819 | 0.516445946 | -0.282584 | 0.000306 | hypomethylated |
| cg09556939 | 0.7961  | 0.654478919 | -0.282603 | 0.000176 | hypomethylated |
| cg00966255 | 0.82988 | 0.682240541 | -0.282622 | 6.54E-05 | hypomethylated |
| cg09858811 | 0.70461 | 0.579216216 | -0.282723 | 0.000229 | hypomethylated |
| cg12048331 | 0.84288 | 0.692860541 | -0.282762 | 0.000142 | hypomethylated |
| cg18245316 | 0.7377  | 0.606388649 | -0.282791 | 0.000274 | hypomethylated |
| cg03737424 | 0.76386 | 0.627883784 | -0.282811 | 0.000268 | hypomethylated |
| cg26159905 | 0.69172 | 0.568584324 | -0.282814 | 0.000172 | hypomethylated |
| cg17550708 | 0.82887 | 0.681313514 | -0.282827 | 2.35E-05 | hypomethylated |
| cg01130611 | 0.8884  | 0.730148649 | -0.283019 | 1.02E-05 | hypomethylated |
| cg04835091 | 0.90527 | 0.744012432 | -0.283021 | 2.04E-05 | hypomethylated |
| cg18688392 | 0.80059 | 0.657941622 | -0.283104 | 0.000116 | hypomethylated |
| cg26615188 | 0.83995 | 0.690240541 | -0.283204 | 0.000306 | hypomethylated |
| cg08043998 | 0.70729 | 0.581224865 | -0.283205 | 0.002274 | hypomethylated |
| cg18634560 | 0.87406 | 0.71826     | -0.283226 | 2.32E-05 | hypomethylated |
| cg22600832 | 0.89539 | 0.735787027 | -0.283228 | 6.93E-06 | hypomethylated |
| cg26708427 | 0.82266 | 0.676009189 | -0.283253 | 0.000209 | hypomethylated |
| cg16568084 | 0.89571 | 0.73598973  | -0.283346 | 2.46E-06 | hypomethylated |
| cg06967304 | 0.79653 | 0.654367568 | -0.283627 | 8.22E-05 | hypomethylated |
| cg20181312 | 0.92437 | 0.759380541 | -0.283647 | 1.58E-05 | hypomethylated |
| cg03260781 | 0.68511 | 0.562808108 | -0.283693 | 0.001367 | hypomethylated |
| cg05308645 | 0.72277 | 0.593699459 | -0.283804 | 0.000626 | hypomethylated |
| cg27475088 | 0.63722 | 0.523418378 | -0.283827 | 3.79E-06 | hypomethylated |
| cg20329303 | 0.86087 | 0.707014054 | -0.284056 | 7.38E-05 | hypomethylated |
| cg15801433 | 0.6487  | 0.532745946 | -0.284104 | 0.000207 | hypomethylated |
| cg10604040 | 0.80073 | 0.657599459 | -0.284107 | 1.94E-05 | hypomethylated |
| cg22795769 | 0.73476 | 0.603380541 | -0.284205 | 0.000232 | hypomethylated |
| cg24951989 | 0.80017 | 0.657021622 | -0.284366 | 0.000152 | hypomethylated |
| cg16421157 | 0.83612 | 0.686527027 | -0.284393 | 0.000104 | hypomethylated |
| cg00350478 | 0.6189  | 0.508151351 | -0.284448 | 7.29E-05 | hypomethylated |
| cg13614606 | 0.85446 | 0.701548649 | -0.28447  | 0.000123 | hypomethylated |
| cg22259097 | 0.84251 | 0.691700541 | -0.284546 | 2.42E-05 | hypomethylated |
| cg26249852 | 0.75169 | 0.617125405 | -0.284574 | 0.000313 | hypomethylated |
| cg18861547 | 0.72611 | 0.596114595 | -0.284598 | 0.00032  | hypomethylated |



|            |         |             |           |          |                |
|------------|---------|-------------|-----------|----------|----------------|
| cg21294616 | 0.88814 | 0.729127027 | -0.284617 | 2.92E-05 | hypomethylated |
| cg21186263 | 0.68945 | 0.566005405 | -0.28463  | 0.000234 | hypomethylated |
| cg10669597 | 0.92386 | 0.758423243 | -0.284671 | 1.18E-06 | hypomethylated |
| cg00079598 | 0.8065  | 0.66206     | -0.284713 | 0.001423 | hypomethylated |
| cg16241649 | 0.74977 | 0.615474054 | -0.28475  | 0.000287 | hypomethylated |
| cg22961699 | 0.88904 | 0.729628108 | -0.285087 | 1.04E-05 | hypomethylated |
| cg07677570 | 0.7275  | 0.597048108 | -0.2851   | 0.000207 | hypomethylated |
| cg15859311 | 0.76983 | 0.63176     | -0.285163 | 2.61E-05 | hypomethylated |
| cg25618916 | 0.66497 | 0.545704865 | -0.285168 | 0.000101 | hypomethylated |
| cg02978544 | 0.8446  | 0.693082703 | -0.285241 | 4.47E-05 | hypomethylated |
| cg03005191 | 0.87771 | 0.720239459 | -0.285268 | 5.06E-05 | hypomethylated |
| cg16624521 | 0.7767  | 0.63735027  | -0.285271 | 0.000154 | hypomethylated |
| cg10584914 | 0.77438 | 0.635441622 | -0.285282 | 2.32E-05 | hypomethylated |
| cg01562813 | 0.82558 | 0.677389189 | -0.285423 | 0.000495 | hypomethylated |
| cg14849421 | 0.76904 | 0.630921622 | -0.285598 | 0.00028  | hypomethylated |
| cg09147400 | 0.80495 | 0.660311892 | -0.285752 | 8.03E-05 | hypomethylated |
| cg01165661 | 0.72262 | 0.592744324 | -0.285827 | 0.000374 | hypomethylated |
| cg00476608 | 0.78137 | 0.640891351 | -0.285926 | 0.001188 | hypomethylated |
| cg02074763 | 0.85225 | 0.698983243 | -0.286019 | 9.38E-05 | hypomethylated |
| cg17161266 | 0.81094 | 0.665083784 | -0.286059 | 0.000454 | hypomethylated |
| cg11045198 | 0.86618 | 0.710341622 | -0.286154 | 1.12E-05 | hypomethylated |
| cg26922451 | 0.82109 | 0.673344865 | -0.286195 | 4.47E-05 | hypomethylated |
| cg27307975 | 0.83961 | 0.688520541 | -0.28622  | 0.000104 | hypomethylated |
| cg04434994 | 0.89012 | 0.729924324 | -0.286253 | 1.71E-05 | hypomethylated |
| cg22731190 | 0.75763 | 0.62126     | -0.286296 | 4.30E-06 | hypomethylated |
| cg16362014 | 0.73347 | 0.601428108 | -0.286346 | 0.001587 | hypomethylated |
| cg06019763 | 0.85653 | 0.702323243 | -0.286369 | 0.000112 | hypomethylated |
| cg25605174 | 0.76634 | 0.628283784 | -0.286568 | 1.39E-05 | hypomethylated |
| cg14858504 | 0.79631 | 0.652848649 | -0.286582 | 3.67E-05 | hypomethylated |
| cg08206517 | 0.7032  | 0.57642     | -0.286815 | 0.000142 | hypomethylated |
| cg04387059 | 0.84462 | 0.692336757 | -0.286828 | 1.06E-05 | hypomethylated |
| cg23682310 | 0.81285 | 0.666288108 | -0.286843 | 8.32E-05 | hypomethylated |
| cg02290550 | 0.64149 | 0.525818919 | -0.286861 | 0.000178 | hypomethylated |
| cg10331989 | 0.79719 | 0.653416216 | -0.286921 | 0.000163 | hypomethylated |
| cg26292910 | 0.74233 | 0.608437838 | -0.286951 | 0.000517 | hypomethylated |
| cg16320427 | 0.90437 | 0.741206486 | -0.287038 | 9.82E-06 | hypomethylated |
| cg18551353 | 0.78542 | 0.643691892 | -0.287094 | 0.000155 | hypomethylated |
| cg11179625 | 0.85882 | 0.703845946 | -0.287096 | 0.000122 | hypomethylated |
| cg12688942 | 0.76442 | 0.626446486 | -0.287174 | 0.000155 | hypomethylated |
| cg21125112 | 0.80159 | 0.656894595 | -0.287203 | 0.000145 | hypomethylated |
| cg26137915 | 0.86516 | 0.708988649 | -0.287204 | 0.000256 | hypomethylated |
| cg00943124 | 0.79834 | 0.654176757 | -0.287323 | 1.25E-05 | hypomethylated |
| cg23067535 | 0.71922 | 0.589316757 | -0.28739  | 0.000157 | hypomethylated |
| cg09179691 | 0.76969 | 0.630662703 | -0.287409 | 9.49E-05 | hypomethylated |
| cg26565120 | 0.80609 | 0.660428108 | -0.287539 | 5.72E-05 | hypomethylated |
| cg20102955 | 0.80323 | 0.658067027 | -0.287579 | 0.000163 | hypomethylated |
| cg14939765 | 0.79345 | 0.649946486 | -0.287818 | 0.000245 | hypomethylated |
| cg21804531 | 0.75399 | 0.61759027  | -0.287895 | 0.000168 | hypomethylated |
| cg11378979 | 0.81839 | 0.670292432 | -0.287998 | 4.05E-05 | hypomethylated |
| cg08118034 | 0.78991 | 0.64696     | -0.288012 | 1.50E-05 | hypomethylated |
| cg13146553 | 0.86604 | 0.709295135 | -0.288048 | 1.35E-05 | hypomethylated |
| cg20016569 | 0.84067 | 0.688508108 | -0.288066 | 0.000163 | hypomethylated |
| cg08039587 | 0.77332 | 0.633316757 | -0.288138 | 0.000216 | hypomethylated |
| cg23369364 | 0.80913 | 0.662639459 | -0.288147 | 8.73E-05 | hypomethylated |
| cg10631854 | 0.68141 | 0.557932973 | -0.288431 | 0.000667 | hypomethylated |
| cg24191847 | 0.77583 | 0.635234595 | -0.288451 | 9.05E-05 | hypomethylated |
| cg00724839 | 0.7511  | 0.614893514 | -0.288668 | 0.000399 | hypomethylated |
| cg15447017 | 0.88816 | 0.727084865 | -0.288696 | 4.67E-06 | hypomethylated |

|            |         |             |           |          |                |
|------------|---------|-------------|-----------|----------|----------------|
| cg24183098 | 0.76571 | 0.626758378 | -0.288889 | 0.00017  | hypomethylated |
| cg09190795 | 0.87222 | 0.713916757 | -0.288936 | 3.67E-05 | hypomethylated |
| cg23345977 | 0.88156 | 0.721552432 | -0.288955 | 8.37E-06 | hypomethylated |
| cg11177614 | 0.90319 | 0.739237297 | -0.288992 | 1.39E-05 | hypomethylated |
| cg26713109 | 0.80088 | 0.655490811 | -0.289011 | 0.000135 | hypomethylated |
| cg14193806 | 0.80192 | 0.656305405 | -0.289091 | 1.14E-05 | hypomethylated |
| cg10031769 | 0.75639 | 0.619036216 | -0.289106 | 0.000191 | hypomethylated |
| cg09444426 | 0.84529 | 0.691756216 | -0.289183 | 1.62E-05 | hypomethylated |
| cg17437218 | 0.65161 | 0.533244865 | -0.289211 | 0.000277 | hypomethylated |
| cg18736676 | 0.95263 | 0.779567027 | -0.289243 | 3.12E-06 | hypomethylated |
| cg24852883 | 0.90988 | 0.744574595 | -0.28926  | 8.48E-06 | hypomethylated |
| cg16111488 | 0.87532 | 0.716285405 | -0.289276 | 5.81E-06 | hypomethylated |
| cg15789106 | 0.49801 | 0.407519459 | -0.289306 | 0.00028  | hypomethylated |
| cg25948831 | 0.89823 | 0.734975135 | -0.289389 | 6.48E-06 | hypomethylated |
| cg22542139 | 0.77877 | 0.637203784 | -0.289442 | 0.000116 | hypomethylated |
| cg10574843 | 0.90511 | 0.74051027  | -0.289573 | 5.86E-05 | hypomethylated |
| cg04415689 | 0.90261 | 0.738363784 | -0.289771 | 4.07E-06 | hypomethylated |
| cg12395919 | 0.86274 | 0.705708649 | -0.289853 | 3.23E-05 | hypomethylated |
| cg23172057 | 0.80826 | 0.661064865 | -0.290028 | 8.03E-05 | hypomethylated |
| cg02803141 | 0.88925 | 0.727287568 | -0.290063 | 9.49E-05 | hypomethylated |
| cg18245230 | 0.72222 | 0.590673514 | -0.290077 | 0.000893 | hypomethylated |
| cg18355311 | 0.75332 | 0.61604973  | -0.290216 | 0.000523 | hypomethylated |
| cg03807330 | 0.59869 | 0.489563784 | -0.290312 | 0.000306 | hypomethylated |
| cg13538475 | 0.85988 | 0.703135676 | -0.290332 | 5.19E-05 | hypomethylated |
| cg00185413 | 0.87481 | 0.715326486 | -0.290368 | 1.54E-05 | hypomethylated |
| cg13935127 | 0.82509 | 0.674638919 | -0.290436 | 0.000313 | hypomethylated |
| cg08853571 | 0.83267 | 0.680717297 | -0.290689 | 5.93E-05 | hypomethylated |
| cg00261668 | 0.73907 | 0.604194054 | -0.290699 | 0.000262 | hypomethylated |
| cg20989454 | 0.77737 | 0.635503243 | -0.290702 | 5.65E-06 | hypomethylated |
| cg25609954 | 0.76589 | 0.626034595 | -0.290895 | 0.000256 | hypomethylated |
| cg03276982 | 0.83728 | 0.684382162 | -0.290908 | 0.000237 | hypomethylated |
| cg13184814 | 0.81622 | 0.66716     | -0.290925 | 3.49E-05 | hypomethylated |
| cg19273668 | 0.80756 | 0.660075676 | -0.290938 | 7.38E-05 | hypomethylated |
| cg10633827 | 0.71686 | 0.585859459 | -0.291137 | 5.93E-05 | hypomethylated |
| cg00368296 | 0.84747 | 0.692595135 | -0.29115  | 1.35E-05 | hypomethylated |
| cg18209489 | 0.70642 | 0.577312432 | -0.291174 | 5.86E-05 | hypomethylated |
| cg26703956 | 0.85581 | 0.699374054 | -0.291226 | 0.000207 | hypomethylated |
| cg27110491 | 0.82001 | 0.67008973  | -0.291287 | 2.27E-05 | hypomethylated |
| cg17443080 | 0.6752  | 0.551748649 | -0.291304 | 0.000435 | hypomethylated |
| cg07855221 | 0.70986 | 0.580054595 | -0.291346 | 0.001541 | hypomethylated |
| cg03927131 | 0.88798 | 0.725516757 | -0.291518 | 2.64E-05 | hypomethylated |
| cg00391031 | 0.8878  | 0.72522973  | -0.291797 | 1.50E-05 | hypomethylated |
| cg07572435 | 0.77237 | 0.630917297 | -0.291841 | 0.000166 | hypomethylated |
| cg22280238 | 0.69589 | 0.568441081 | -0.291848 | 0.001074 | hypomethylated |
| cg13736939 | 0.73857 | 0.603281622 | -0.291903 | 0.001571 | hypomethylated |
| cg08468772 | 0.85393 | 0.697471892 | -0.291983 | 4.53E-05 | hypomethylated |
| cg15556591 | 0.85304 | 0.696744865 | -0.291983 | 0.0002   | hypomethylated |
| cg02174203 | 0.60087 | 0.490739459 | -0.292096 | 0.00017  | hypomethylated |
| cg19023552 | 0.57256 | 0.467596757 | -0.292162 | 0.000335 | hypomethylated |
| cg07886914 | 0.81987 | 0.669568649 | -0.292163 | 8.84E-05 | hypomethylated |
| cg19924352 | 0.77082 | 0.629496216 | -0.292196 | 2.21E-05 | hypomethylated |
| cg14741870 | 0.76759 | 0.626847027 | -0.292222 | 0.00017  | hypomethylated |
| cg16575694 | 0.84692 | 0.691616757 | -0.292253 | 0.000109 | hypomethylated |
| cg23257859 | 0.64164 | 0.523979459 | -0.292254 | 0.000317 | hypomethylated |
| cg22674248 | 0.80106 | 0.654044865 | -0.292521 | 8.60E-06 | hypomethylated |
| cg25483596 | 0.91128 | 0.744008108 | -0.292576 | 2.21E-05 | hypomethylated |
| cg03245218 | 0.83885 | 0.68484973  | -0.292625 | 2.96E-05 | hypomethylated |
| cg01933240 | 0.70228 | 0.573265946 | -0.292842 | 0.000157 | hypomethylated |

|            |         |             |           |          |                |
|------------|---------|-------------|-----------|----------|----------------|
| cg25485805 | 0.68463 | 0.558845946 | -0.292874 | 0.000581 | hypomethylated |
| cg14340131 | 0.86671 | 0.707400541 | -0.293022 | 5.43E-06 | hypomethylated |
| cg10108710 | 0.91201 | 0.744346486 | -0.293075 | 1.09E-05 | hypomethylated |
| cg12302526 | 0.83031 | 0.677635676 | -0.29314  | 2.32E-05 | hypomethylated |
| cg12637085 | 0.76884 | 0.627467027 | -0.293144 | 3.07E-05 | hypomethylated |
| cg14852394 | 0.84497 | 0.689567568 | -0.293208 | 0.000148 | hypomethylated |
| cg26932364 | 0.87801 | 0.71651027  | -0.29325  | 9.72E-05 | hypomethylated |
| cg06296169 | 0.85331 | 0.696314054 | -0.293332 | 2.89E-05 | hypomethylated |
| cg00381442 | 0.66243 | 0.540518919 | -0.293423 | 8.03E-05 | hypomethylated |
| cg00830086 | 0.8547  | 0.697387027 | -0.293459 | 4.47E-05 | hypomethylated |
| cg24867501 | 0.65488 | 0.534329189 | -0.293502 | 0.000174 | hypomethylated |
| cg00013660 | 0.76191 | 0.621611892 | -0.293606 | 1.62E-05 | hypomethylated |
| cg03887218 | 0.8501  | 0.693558919 | -0.293614 | 6.95E-05 | hypomethylated |
| cg14009451 | 0.74116 | 0.604665405 | -0.293648 | 9.84E-05 | hypomethylated |
| cg00512454 | 0.81491 | 0.664810811 | -0.293697 | 1.97E-05 | hypomethylated |
| cg16781189 | 0.84011 | 0.685355135 | -0.293726 | 2.49E-06 | hypomethylated |
| cg10219789 | 0.70059 | 0.571535676 | -0.293727 | 0.000145 | hypomethylated |
| cg19778647 | 0.87536 | 0.714055135 | -0.293841 | 0.000142 | hypomethylated |
| cg02821464 | 0.63174 | 0.515297297 | -0.293926 | 0.000517 | hypomethylated |
| cg13863204 | 0.86665 | 0.706841081 | -0.294064 | 2.85E-05 | hypomethylated |
| cg26558862 | 0.92223 | 0.752145946 | -0.294114 | 1.06E-05 | hypomethylated |
| cg02047803 | 0.82123 | 0.669737297 | -0.294191 | 1.08E-05 | hypomethylated |
| cg22349332 | 0.71737 | 0.585028649 | -0.29421  | 0.00071  | hypomethylated |
| cg06852243 | 0.76411 | 0.623131892 | -0.294243 | 0.000495 | hypomethylated |
| cg14534803 | 0.76674 | 0.625234595 | -0.29434  | 0.000166 | hypomethylated |
| cg04231701 | 0.80904 | 0.659699459 | -0.294402 | 3.53E-05 | hypomethylated |
| cg27451550 | 0.91549 | 0.746475135 | -0.29445  | 3.59E-06 | hypomethylated |
| cg10460350 | 0.62085 | 0.506174054 | -0.294611 | 0.001684 | hypomethylated |
| cg02486268 | 0.79971 | 0.651987568 | -0.294632 | 5.58E-05 | hypomethylated |
| cg26609398 | 0.77087 | 0.628467027 | -0.294651 | 0.000145 | hypomethylated |
| cg17338299 | 0.78328 | 0.638578378 | -0.294664 | 5.72E-05 | hypomethylated |
| cg09417640 | 0.9255  | 0.754503784 | -0.294705 | 3.30E-06 | hypomethylated |
| cg00411411 | 0.6515  | 0.531115676 | -0.294739 | 0.000185 | hypomethylated |
| cg09414557 | 0.83872 | 0.683731892 | -0.294759 | 2.07E-05 | hypomethylated |
| cg15712520 | 0.70942 | 0.578293514 | -0.294838 | 0.00024  | hypomethylated |
| cg01032675 | 0.76506 | 0.623640541 | -0.294858 | 0.000848 | hypomethylated |
| cg09936663 | 0.90925 | 0.741130811 | -0.294949 | 1.18E-05 | hypomethylated |
| cg03749697 | 0.88856 | 0.724207568 | -0.295066 | 1.12E-05 | hypomethylated |
| cg02532672 | 0.64366 | 0.524596757 | -0.29509  | 0.000207 | hypomethylated |
| cg17746130 | 0.73256 | 0.596996216 | -0.295225 | 8.03E-05 | hypomethylated |
| cg16545821 | 0.82757 | 0.674410811 | -0.295254 | 0.000107 | hypomethylated |
| cg17598552 | 0.63853 | 0.520344865 | -0.295286 | 0.000528 | hypomethylated |
| cg16713321 | 0.84461 | 0.688278378 | -0.295293 | 8.22E-05 | hypomethylated |
| cg24689061 | 0.92997 | 0.75782     | -0.295329 | 0.00035  | hypomethylated |
| cg07658646 | 0.8456  | 0.689039459 | -0.295389 | 0.00017  | hypomethylated |
| cg02319094 | 0.61767 | 0.503305946 | -0.295401 | 0.000335 | hypomethylated |
| cg16780771 | 0.75537 | 0.6155      | -0.295425 | 2.64E-05 | hypomethylated |
| cg08795515 | 0.80288 | 0.654152973 | -0.295556 | 6.46E-05 | hypomethylated |
| cg04213073 | 0.8545  | 0.696131351 | -0.295721 | 0.000137 | hypomethylated |
| cg19251500 | 0.79081 | 0.644161081 | -0.29591  | 1.80E-05 | hypomethylated |
| cg24121168 | 0.71156 | 0.579607027 | -0.29591  | 0.00078  | hypomethylated |
| cg01798385 | 0.75325 | 0.613563784 | -0.295915 | 5.58E-05 | hypomethylated |
| cg24236839 | 0.62411 | 0.508332973 | -0.296027 | 0.002803 | hypomethylated |
| cg04665930 | 0.78757 | 0.641357297 | -0.29628  | 4.15E-05 | hypomethylated |
| cg04018738 | 0.94346 | 0.768302703 | -0.296287 | 2.39E-05 | hypomethylated |
| cg19376858 | 0.86368 | 0.703328649 | -0.296298 | 0.000187 | hypomethylated |
| cg16681436 | 0.82117 | 0.668660541 | -0.296407 | 7.41E-06 | hypomethylated |
| cg22725222 | 0.70849 | 0.576901081 | -0.296424 | 0.000107 | hypomethylated |

|            |         |             |           |          |                |
|------------|---------|-------------|-----------|----------|----------------|
| cg13169491 | 0.88128 | 0.717563243 | -0.296494 | 2.15E-05 | hypomethylated |
| cg04723137 | 0.85921 | 0.699573514 | -0.296535 | 5.86E-05 | hypomethylated |
| cg08298644 | 0.67284 | 0.547814595 | -0.296576 | 0.00049  | hypomethylated |
| cg10284310 | 0.91637 | 0.746053514 | -0.296651 | 1.82E-05 | hypomethylated |
| cg04894027 | 0.72952 | 0.593846486 | -0.296857 | 0.000145 | hypomethylated |
| cg03722472 | 0.80524 | 0.655439459 | -0.296956 | 1.35E-05 | hypomethylated |
| cg09526712 | 0.95995 | 0.781337297 | -0.297014 | 3.90E-06 | hypomethylated |
| cg15039415 | 0.85459 | 0.69558     | -0.297016 | 5.58E-06 | hypomethylated |
| cg18623836 | 0.81994 | 0.66736973  | -0.297032 | 0.000245 | hypomethylated |
| cg12466022 | 0.91607 | 0.74556     | -0.297133 | 1.04E-05 | hypomethylated |
| cg02650128 | 0.80959 | 0.658870811 | -0.297196 | 4.58E-05 | hypomethylated |
| cg01801643 | 0.82689 | 0.672938919 | -0.29722  | 0.000517 | hypomethylated |
| cg21473545 | 0.68091 | 0.554137297 | -0.297221 | 0.002253 | hypomethylated |
| cg22396498 | 0.80839 | 0.657835676 | -0.297324 | 0.000224 | hypomethylated |
| cg05168404 | 0.5895  | 0.479705405 | -0.297343 | 0.000696 | hypomethylated |
| cg05498539 | 0.81363 | 0.662088649 | -0.297348 | 5.58E-06 | hypomethylated |
| cg17234201 | 0.83798 | 0.681863784 | -0.297432 | 1.46E-05 | hypomethylated |
| cg11763800 | 0.79654 | 0.648137838 | -0.297446 | 0.00017  | hypomethylated |
| cg01243950 | 0.88848 | 0.722916216 | -0.297511 | 1.77E-05 | hypomethylated |
| cg19136371 | 0.84814 | 0.690051351 | -0.297599 | 0.000268 | hypomethylated |
| cg00115149 | 0.90358 | 0.7351      | -0.297712 | 2.67E-05 | hypomethylated |
| cg10844275 | 0.87823 | 0.714443243 | -0.297779 | 2.57E-05 | hypomethylated |
| cg04149930 | 0.83909 | 0.682588649 | -0.297809 | 4.88E-05 | hypomethylated |
| cg17150809 | 0.79844 | 0.649508649 | -0.297835 | 0.000268 | hypomethylated |
| cg11906607 | 0.76579 | 0.622906486 | -0.297933 | 5.06E-05 | hypomethylated |
| cg06877366 | 0.88238 | 0.717717838 | -0.297983 | 7.20E-05 | hypomethylated |
| cg19407392 | 0.8124  | 0.660753514 | -0.298078 | 0.000135 | hypomethylated |
| cg26774156 | 0.87882 | 0.714734054 | -0.298161 | 9.72E-05 | hypomethylated |
| cg03478444 | 0.82676 | 0.672381081 | -0.298189 | 0.000176 | hypomethylated |
| cg08830588 | 0.72683 | 0.591101622 | -0.298212 | 0.000224 | hypomethylated |
| cg13686739 | 0.74646 | 0.607045946 | -0.298259 | 1.50E-05 | hypomethylated |
| cg17747551 | 0.88797 | 0.722125946 | -0.29826  | 6.01E-05 | hypomethylated |
| cg05302441 | 0.67698 | 0.550482703 | -0.298416 | 0.00113  | hypomethylated |
| cg21620606 | 0.85914 | 0.698554054 | -0.298521 | 5.06E-05 | hypomethylated |
| cg01321174 | 0.68696 | 0.558518378 | -0.298621 | 4.70E-05 | hypomethylated |
| cg18759732 | 0.81714 | 0.664292432 | -0.298765 | 0.000216 | hypomethylated |
| cg17223698 | 0.83586 | 0.679318378 | -0.299173 | 5.50E-06 | hypomethylated |
| cg14592798 | 0.88142 | 0.716324865 | -0.299216 | 2.32E-05 | hypomethylated |
| cg14084826 | 0.74759 | 0.60752     | -0.299315 | 0.000123 | hypomethylated |
| cg10596692 | 0.89491 | 0.727195135 | -0.2994   | 2.91E-06 | hypomethylated |
| cg22092292 | 0.81343 | 0.660974595 | -0.299423 | 2.04E-05 | hypomethylated |
| cg13756898 | 0.79513 | 0.646063243 | -0.299515 | 0.00014  | hypomethylated |
| cg26921566 | 0.71454 | 0.580562162 | -0.299564 | 0.000195 | hypomethylated |
| cg12962167 | 0.87248 | 0.708860541 | -0.29962  | 0.000174 | hypomethylated |
| cg04804814 | 0.65974 | 0.536002162 | -0.299659 | 4.47E-05 | hypomethylated |
| cg05726758 | 0.7271  | 0.59071027  | -0.299703 | 0.000189 | hypomethylated |
| cg25737397 | 0.85867 | 0.697591351 | -0.299722 | 3.32E-05 | hypomethylated |
| cg07580831 | 0.77946 | 0.633183243 | -0.299852 | 0.000324 | hypomethylated |
| cg26893451 | 0.66972 | 0.543994054 | -0.299967 | 9.38E-05 | hypomethylated |
| cg01638529 | 0.76825 | 0.623956216 | -0.300131 | 3.76E-05 | hypomethylated |
| cg22158252 | 0.79428 | 0.645085946 | -0.300156 | 1.66E-05 | hypomethylated |
| cg26167010 | 0.83342 | 0.676853514 | -0.3002   | 3.67E-05 | hypomethylated |
| cg06595022 | 0.94208 | 0.765082162 | -0.300235 | 5.06E-05 | hypomethylated |
| cg02021180 | 0.85706 | 0.696010811 | -0.300286 | 0.000229 | hypomethylated |
| cg01418951 | 0.76793 | 0.623624865 | -0.300296 | 0.001288 | hypomethylated |
| cg04997124 | 0.85629 | 0.695378919 | -0.3003   | 3.90E-06 | hypomethylated |
| cg16153549 | 0.83337 | 0.676748649 | -0.300337 | 0.000563 | hypomethylated |
| cg23516121 | 0.90414 | 0.734089189 | -0.300591 | 2.45E-05 | hypomethylated |

|            |         |             |           |          |                |
|------------|---------|-------------|-----------|----------|----------------|
| cg23720898 | 0.79517 | 0.645585946 | -0.300654 | 8.52E-05 | hypomethylated |
| cg12251145 | 0.76124 | 0.618008108 | -0.300726 | 0.000338 | hypomethylated |
| cg02223135 | 0.91101 | 0.739555676 | -0.300808 | 1.56E-05 | hypomethylated |
| cg25078908 | 0.74204 | 0.602349189 | -0.300897 | 0.000129 | hypomethylated |
| cg02202411 | 0.89938 | 0.73006     | -0.300916 | 2.32E-05 | hypomethylated |
| cg17974515 | 0.7281  | 0.59102     | -0.30093  | 0.000159 | hypomethylated |
| cg04055086 | 0.88103 | 0.715154595 | -0.300936 | 1.01E-05 | hypomethylated |
| cg22200744 | 0.77081 | 0.625663784 | -0.300988 | 0.000229 | hypomethylated |
| cg21201924 | 0.69368 | 0.563057297 | -0.300989 | 5.72E-05 | hypomethylated |
| cg08989290 | 0.69506 | 0.564160541 | -0.301032 | 0.00099  | hypomethylated |
| cg14624731 | 0.66915 | 0.54312973  | -0.301033 | 0.000789 | hypomethylated |
| cg20840174 | 0.75344 | 0.611501081 | -0.301138 | 0.000822 | hypomethylated |
| cg25023198 | 0.71663 | 0.581593514 | -0.301217 | 0.003316 | hypomethylated |
| cg05953316 | 0.70901 | 0.575405946 | -0.301226 | 6.62E-05 | hypomethylated |
| cg04789475 | 0.74293 | 0.602881081 | -0.301353 | 0.001041 | hypomethylated |
| cg07233952 | 0.72309 | 0.586777838 | -0.301361 | 0.001395 | hypomethylated |
| cg25456144 | 0.85179 | 0.691212973 | -0.301367 | 4.82E-05 | hypomethylated |
| cg20344448 | 0.73063 | 0.592883243 | -0.301393 | 0.000335 | hypomethylated |
| cg03339956 | 0.60893 | 0.494123784 | -0.301404 | 9.49E-05 | hypomethylated |
| cg07324752 | 0.694   | 0.563144324 | -0.301431 | 0.000229 | hypomethylated |
| cg07183691 | 0.89423 | 0.725611892 | -0.301448 | 5.00E-06 | hypomethylated |
| cg27438128 | 0.70748 | 0.574054054 | -0.301503 | 0.000268 | hypomethylated |
| cg26493306 | 0.92465 | 0.750234054 | -0.301567 | 6.30E-06 | hypomethylated |
| cg16117554 | 0.80188 | 0.650598378 | -0.301619 | 0.000182 | hypomethylated |
| cg09366118 | 0.66719 | 0.541318378 | -0.30162  | 0.001225 | hypomethylated |
| cg03947749 | 0.8154  | 0.661552432 | -0.301652 | 6.62E-05 | hypomethylated |
| cg11228624 | 0.71136 | 0.577068108 | -0.301838 | 2.92E-05 | hypomethylated |
| cg09169739 | 0.8246  | 0.66887027  | -0.301968 | 0.000251 | hypomethylated |
| cg18922620 | 0.82333 | 0.667815676 | -0.302021 | 0.000575 | hypomethylated |
| cg09620688 | 0.70335 | 0.57046     | -0.302117 | 4.82E-05 | hypomethylated |
| cg12895370 | 0.83198 | 0.674779459 | -0.302133 | 0.00018  | hypomethylated |
| cg15500259 | 0.75805 | 0.614784865 | -0.302211 | 9.31E-06 | hypomethylated |
| cg09508490 | 0.81157 | 0.658132973 | -0.302336 | 1.39E-05 | hypomethylated |
| cg07147614 | 0.58197 | 0.471936757 | -0.302351 | 0.000342 | hypomethylated |
| cg19140928 | 0.8876  | 0.719772432 | -0.302369 | 1.80E-05 | hypomethylated |
| cg18485872 | 0.8098  | 0.656676216 | -0.302383 | 5.58E-05 | hypomethylated |
| cg12711059 | 0.75794 | 0.614599459 | -0.302437 | 0.000262 | hypomethylated |
| cg07854113 | 0.83889 | 0.680232973 | -0.302453 | 0.000187 | hypomethylated |
| cg11833938 | 0.97237 | 0.78840973  | -0.30256  | 1.15E-06 | hypomethylated |
| cg03806812 | 0.63701 | 0.516477297 | -0.302611 | 0.001118 | hypomethylated |
| cg26435198 | 0.75286 | 0.610401081 | -0.302624 | 7.20E-05 | hypomethylated |
| cg05607079 | 0.8949  | 0.725553514 | -0.302644 | 3.67E-05 | hypomethylated |
| cg20424781 | 0.88941 | 0.721067568 | -0.302714 | 5.21E-06 | hypomethylated |
| cg08729600 | 0.88845 | 0.72025027  | -0.302792 | 1.06E-05 | hypomethylated |
| cg03666300 | 0.86301 | 0.699597297 | -0.302853 | 2.02E-05 | hypomethylated |
| cg12619162 | 0.637   | 0.51638     | -0.30286  | 0.000174 | hypomethylated |
| cg22658979 | 0.93812 | 0.76048     | -0.302862 | 1.12E-06 | hypomethylated |
| cg21885134 | 0.7494  | 0.607484865 | -0.302888 | 5.00E-06 | hypomethylated |
| cg00594191 | 0.79773 | 0.646597297 | -0.303033 | 0.000667 | hypomethylated |
| cg07236001 | 0.79445 | 0.643926486 | -0.30306  | 0.000445 | hypomethylated |
| cg26632171 | 0.79446 | 0.643877838 | -0.303188 | 0.000152 | hypomethylated |
| cg26029221 | 0.66214 | 0.536630811 | -0.303206 | 0.000191 | hypomethylated |
| cg09934892 | 0.78537 | 0.636488649 | -0.303238 | 0.000594 | hypomethylated |
| cg15003194 | 0.79348 | 0.64304973  | -0.303264 | 5.00E-05 | hypomethylated |
| cg27128311 | 0.87733 | 0.71098973  | -0.303291 | 0.000382 | hypomethylated |
| cg17305275 | 0.77774 | 0.630191351 | -0.303498 | 0.000122 | hypomethylated |
| cg25781868 | 0.7108  | 0.57595027  | -0.303499 | 0.000104 | hypomethylated |
| cg21875839 | 0.81546 | 0.660711892 | -0.303593 | 0.000178 | hypomethylated |

|            |         |             |           |          |                |
|------------|---------|-------------|-----------|----------|----------------|
| cg13560058 | 0.6879  | 0.557357838 | -0.303595 | 0.000358 | hypomethylated |
| cg13697715 | 0.57823 | 0.468488108 | -0.303631 | 0.000145 | hypomethylated |
| cg05655190 | 0.60551 | 0.490561622 | -0.303716 | 0.012637 | hypomethylated |
| cg19925599 | 0.75839 | 0.614414054 | -0.303729 | 7.84E-05 | hypomethylated |
| cg01727585 | 0.73162 | 0.592694054 | -0.303807 | 0.000182 | hypomethylated |
| cg18758900 | 0.82559 | 0.668815676 | -0.303817 | 0.000214 | hypomethylated |
| cg21880020 | 0.77173 | 0.625159459 | -0.303872 | 4.47E-05 | hypomethylated |
| cg03515464 | 0.82442 | 0.667798919 | -0.303966 | 1.12E-05 | hypomethylated |
| cg05877661 | 0.89077 | 0.721515135 | -0.304023 | 0.000191 | hypomethylated |
| cg13958199 | 0.76821 | 0.622223243 | -0.304068 | 0.000426 | hypomethylated |
| cg23755074 | 0.86316 | 0.699124865 | -0.304078 | 3.95E-05 | hypomethylated |
| cg01188509 | 0.8182  | 0.662703784 | -0.304089 | 2.39E-05 | hypomethylated |
| cg00795584 | 0.76885 | 0.622731351 | -0.304092 | 0.000626 | hypomethylated |
| cg21194726 | 0.80063 | 0.648396757 | -0.304259 | 0.000191 | hypomethylated |
| cg11358199 | 0.74148 | 0.600491351 | -0.304264 | 0.003255 | hypomethylated |
| cg19145320 | 0.84594 | 0.685057297 | -0.304331 | 0.000109 | hypomethylated |
| cg09886009 | 0.76904 | 0.622703243 | -0.304514 | 7.65E-05 | hypomethylated |
| cg23371476 | 0.86038 | 0.696647027 | -0.304546 | 0.000189 | hypomethylated |
| cg08658895 | 0.78372 | 0.634562703 | -0.304576 | 2.57E-05 | hypomethylated |
| cg27579097 | 0.82884 | 0.67108973  | -0.304588 | 0.000209 | hypomethylated |
| cg04957903 | 0.75944 | 0.614892973 | -0.304601 | 0.00134  | hypomethylated |
| cg17827767 | 0.77062 | 0.623927027 | -0.304642 | 0.000342 | hypomethylated |
| cg01219549 | 0.97197 | 0.786945405 | -0.304648 | 3.49E-06 | hypomethylated |
| cg17800396 | 0.65155 | 0.527488649 | -0.304736 | 0.000342 | hypomethylated |
| cg21746275 | 0.83725 | 0.677810811 | -0.304776 | 0.000256 | hypomethylated |
| cg21562656 | 0.86204 | 0.697787568 | -0.304967 | 1.09E-05 | hypomethylated |
| cg01000553 | 0.79249 | 0.64147027  | -0.30501  | 2.74E-05 | hypomethylated |
| cg10964472 | 0.89709 | 0.726133514 | -0.305018 | 0.000382 | hypomethylated |
| cg03489712 | 0.70943 | 0.574230811 | -0.30503  | 0.001164 | hypomethylated |
| cg08699270 | 0.7894  | 0.638942703 | -0.30507  | 0.001164 | hypomethylated |
| cg02843667 | 0.78498 | 0.635363784 | -0.305073 | 0.000106 | hypomethylated |
| cg14138287 | 0.77971 | 0.631078378 | -0.305118 | 1.84E-05 | hypomethylated |
| cg09560549 | 0.75013 | 0.607106486 | -0.305191 | 0.002502 | hypomethylated |
| cg16606561 | 0.89927 | 0.727740541 | -0.30533  | 7.03E-06 | hypomethylated |
| cg13696706 | 0.62432 | 0.505235135 | -0.305331 | 0.001987 | hypomethylated |
| cg14338073 | 0.76971 | 0.622864865 | -0.305396 | 0.000789 | hypomethylated |
| cg18506018 | 0.78117 | 0.63212973  | -0.305416 | 0.000256 | hypomethylated |
| cg08134671 | 0.74034 | 0.599057838 | -0.305493 | 0.002066 | hypomethylated |
| cg03291825 | 0.6191  | 0.500911351 | -0.305617 | 0.000193 | hypomethylated |
| cg00733493 | 0.66162 | 0.535300541 | -0.305654 | 0.000107 | hypomethylated |
| cg15090036 | 0.87471 | 0.707691892 | -0.305683 | 7.32E-06 | hypomethylated |
| cg03078586 | 0.82435 | 0.666942162 | -0.305695 | 3.07E-05 | hypomethylated |
| cg08376089 | 0.826   | 0.668271892 | -0.305707 | 3.49E-05 | hypomethylated |
| cg17972162 | 0.71281 | 0.576695135 | -0.305709 | 0.000408 | hypomethylated |
| cg03502236 | 0.64713 | 0.523485405 | -0.305906 | 0.0002   | hypomethylated |
| cg13180252 | 0.5736  | 0.463994054 | -0.305939 | 0.000283 | hypomethylated |
| cg15708776 | 0.68757 | 0.55614     | -0.306058 | 2.10E-05 | hypomethylated |
| cg04822278 | 0.78937 | 0.638472973 | -0.306076 | 0.00054  | hypomethylated |
| cg05385282 | 0.69666 | 0.563477838 | -0.306096 | 0.000251 | hypomethylated |
| cg23452957 | 0.51555 | 0.416985405 | -0.306115 | 0.000178 | hypomethylated |
| cg04497752 | 0.8394  | 0.678894054 | -0.306172 | 3.64E-06 | hypomethylated |
| cg04727357 | 0.69978 | 0.565969189 | -0.306178 | 0.001107 | hypomethylated |
| cg08860639 | 0.75568 | 0.611174054 | -0.306192 | 0.000116 | hypomethylated |
| cg14271150 | 0.7816  | 0.632137297 | -0.306193 | 1.30E-05 | hypomethylated |
| cg19206437 | 0.79206 | 0.640555135 | -0.306287 | 3.76E-05 | hypomethylated |
| cg00994323 | 0.86132 | 0.696559459 | -0.306303 | 7.56E-05 | hypomethylated |
| cg09490523 | 0.84171 | 0.680665946 | -0.306376 | 0.000216 | hypomethylated |
| cg25786651 | 0.62084 | 0.502039459 | -0.306421 | 0.000178 | hypomethylated |

|            |         |             |           |          |                |
|------------|---------|-------------|-----------|----------|----------------|
| cg26140366 | 0.78365 | 0.633687027 | -0.306439 | 4.36E-05 | hypomethylated |
| cg05076755 | 0.73007 | 0.590297838 | -0.306592 | 0.004567 | hypomethylated |
| cg23088157 | 0.78104 | 0.631503243 | -0.306606 | 4.64E-05 | hypomethylated |
| cg14112978 | 0.84986 | 0.687145946 | -0.306609 | 3.15E-05 | hypomethylated |
| cg26475094 | 0.91874 | 0.742808108 | -0.306667 | 8.37E-06 | hypomethylated |
| cg04260633 | 0.61308 | 0.495668108 | -0.306701 | 5.72E-05 | hypomethylated |
| cg04130356 | 0.76852 | 0.621283243 | -0.306832 | 0.000145 | hypomethylated |
| cg18182039 | 0.80826 | 0.653402703 | -0.306847 | 0.000506 | hypomethylated |
| cg27054847 | 0.70705 | 0.571422703 | -0.307254 | 9.27E-05 | hypomethylated |
| cg01166892 | 0.72686 | 0.587428108 | -0.307265 | 0.000733 | hypomethylated |
| cg22322679 | 0.75161 | 0.607366486 | -0.307417 | 8.84E-05 | hypomethylated |
| cg00484484 | 0.88749 | 0.717152973 | -0.30745  | 2.10E-05 | hypomethylated |
| cg25455811 | 0.79594 | 0.643112973 | -0.307587 | 0.000112 | hypomethylated |
| cg01846046 | 0.93452 | 0.755078378 | -0.307599 | 8.52E-05 | hypomethylated |
| cg23059700 | 0.81499 | 0.658496757 | -0.307606 | 0.00013  | hypomethylated |
| cg26328951 | 0.82299 | 0.664912432 | -0.307711 | 0.000756 | hypomethylated |
| cg17633681 | 0.8412  | 0.679604865 | -0.307753 | 0.000126 | hypomethylated |
| cg00691948 | 0.81343 | 0.657155135 | -0.307784 | 0.000214 | hypomethylated |
| cg06434709 | 0.87147 | 0.704043784 | -0.307786 | 3.15E-05 | hypomethylated |
| cg21720385 | 0.77911 | 0.629343243 | -0.30798  | 0.000102 | hypomethylated |
| cg26688993 | 0.84722 | 0.684353514 | -0.307995 | 0.000126 | hypomethylated |
| cg07285481 | 0.70747 | 0.571431892 | -0.308087 | 0.00012  | hypomethylated |
| cg12742178 | 0.81705 | 0.659940541 | -0.308088 | 5.19E-05 | hypomethylated |
| cg11970177 | 0.89587 | 0.723587568 | -0.308122 | 1.28E-05 | hypomethylated |
| cg15044181 | 0.85462 | 0.690255676 | -0.308152 | 5.58E-05 | hypomethylated |
| cg04436971 | 0.65218 | 0.526748649 | -0.308155 | 6.70E-05 | hypomethylated |
| cg21962760 | 0.68115 | 0.550143784 | -0.308164 | 4.70E-05 | hypomethylated |
| cg23476401 | 0.64082 | 0.51756     | -0.308193 | 0.000506 | hypomethylated |
| cg22971029 | 0.70681 | 0.570837838 | -0.308241 | 0.000517 | hypomethylated |
| cg08969922 | 0.77868 | 0.628807568 | -0.308412 | 0.000152 | hypomethylated |
| cg01849903 | 0.51291 | 0.414184324 | -0.308433 | 8.42E-05 | hypomethylated |
| cg17992670 | 0.88604 | 0.71548973  | -0.308441 | 7.12E-06 | hypomethylated |
| cg20683057 | 0.53909 | 0.435301081 | -0.308513 | 0.000287 | hypomethylated |
| cg19965300 | 0.75149 | 0.606803243 | -0.308525 | 0.000417 | hypomethylated |
| cg18831260 | 0.84193 | 0.67982     | -0.308547 | 2.24E-05 | hypomethylated |
| cg05501498 | 0.80165 | 0.647224324 | -0.308707 | 0.000335 | hypomethylated |
| cg08290013 | 0.65098 | 0.525571892 | -0.308725 | 0.000262 | hypomethylated |
| cg11698445 | 0.77514 | 0.625794595 | -0.308768 | 0.000403 | hypomethylated |
| cg19202886 | 0.83929 | 0.677473514 | -0.309005 | 3.07E-05 | hypomethylated |
| cg07833104 | 0.64956 | 0.524319459 | -0.309017 | 0.000435 | hypomethylated |
| cg16386293 | 0.73233 | 0.591116216 | -0.309052 | 9.16E-05 | hypomethylated |
| cg04903916 | 0.88496 | 0.7143      | -0.309082 | 1.82E-05 | hypomethylated |
| cg19130824 | 0.8105  | 0.654196757 | -0.309088 | 3.49E-05 | hypomethylated |
| cg10191283 | 0.79106 | 0.638503784 | -0.309092 | 4.58E-05 | hypomethylated |
| cg11872478 | 0.78215 | 0.631301081 | -0.309117 | 9.72E-05 | hypomethylated |
| cg18104015 | 0.60775 | 0.490494595 | -0.309241 | 9.38E-05 | hypomethylated |
| cg24145685 | 0.84373 | 0.680938378 | -0.309257 | 2.24E-05 | hypomethylated |
| cg05886261 | 0.79389 | 0.64068973  | -0.309313 | 4.94E-05 | hypomethylated |
| cg07908984 | 0.77051 | 0.621809189 | -0.309342 | 0.000216 | hypomethylated |
| cg13893707 | 0.80816 | 0.652172973 | -0.309386 | 0.000148 | hypomethylated |
| cg07037509 | 0.7971  | 0.643235676 | -0.309413 | 7.56E-05 | hypomethylated |
| cg09839204 | 0.86954 | 0.701691892 | -0.309415 | 1.46E-05 | hypomethylated |
| cg01534390 | 0.81387 | 0.656765405 | -0.30942  | 5.72E-05 | hypomethylated |
| cg13617376 | 0.86698 | 0.699561081 | -0.309549 | 3.67E-05 | hypomethylated |
| cg26684191 | 0.72951 | 0.588624865 | -0.309579 | 2.78E-05 | hypomethylated |
| cg02352181 | 0.83595 | 0.674491892 | -0.309616 | 9.49E-05 | hypomethylated |
| cg07757007 | 0.87894 | 0.709175135 | -0.309623 | 2.27E-05 | hypomethylated |
| cg00141925 | 0.89791 | 0.724478919 | -0.309627 | 1.77E-06 | hypomethylated |

|            |         |             |           |          |                |
|------------|---------|-------------|-----------|----------|----------------|
| cg01345055 | 0.58239 | 0.469815135 | -0.309892 | 0.002026 | hypomethylated |
| cg10959672 | 0.7643  | 0.616560541 | -0.309896 | 0.00095  | hypomethylated |
| cg14165772 | 0.84107 | 0.678465405 | -0.309951 | 0.000178 | hypomethylated |
| cg21838773 | 0.65362 | 0.527249189 | -0.309967 | 0.001717 | hypomethylated |
| cg26088629 | 0.89504 | 0.721990811 | -0.309972 | 0.000102 | hypomethylated |
| cg12256856 | 0.92019 | 0.742258919 | -0.310009 | 5.34E-07 | hypomethylated |
| cg12543918 | 0.77074 | 0.621675676 | -0.310082 | 0.000653 | hypomethylated |
| cg18366480 | 0.85326 | 0.688230811 | -0.310093 | 4.82E-05 | hypomethylated |
| cg02171804 | 0.82369 | 0.664306486 | -0.310252 | 3.39E-06 | hypomethylated |
| cg00423068 | 0.86994 | 0.701605405 | -0.310256 | 1.99E-05 | hypomethylated |
| cg01148741 | 0.64859 | 0.523029189 | -0.310415 | 0.001212 | hypomethylated |
| cg22263591 | 0.72556 | 0.585092973 | -0.310429 | 4.70E-05 | hypomethylated |
| cg24965322 | 0.90126 | 0.72674     | -0.310504 | 2.71E-06 | hypomethylated |
| cg15260921 | 0.66686 | 0.53770973  | -0.310556 | 0.00134  | hypomethylated |
| cg02696561 | 0.85861 | 0.69226     | -0.310689 | 9.57E-06 | hypomethylated |
| cg13390372 | 0.86649 | 0.698565405 | -0.310788 | 7.93E-06 | hypomethylated |
| cg04903600 | 0.65833 | 0.530743784 | -0.310795 | 5.31E-05 | hypomethylated |
| cg26766064 | 0.69792 | 0.562618919 | -0.310904 | 0.000109 | hypomethylated |
| cg21515113 | 0.77339 | 0.623440541 | -0.310944 | 9.05E-05 | hypomethylated |
| cg00845319 | 0.80593 | 0.649670811 | -0.310946 | 8.84E-05 | hypomethylated |
| cg25312122 | 0.83403 | 0.672318919 | -0.310954 | 9.83E-05 | hypomethylated |
| cg05581394 | 0.87678 | 0.706730811 | -0.311054 | 1.62E-05 | hypomethylated |
| cg17540765 | 0.77827 | 0.627316757 | -0.311077 | 6.62E-05 | hypomethylated |
| cg14742187 | 0.83004 | 0.669011892 | -0.311149 | 0.000148 | hypomethylated |
| cg08840230 | 0.84352 | 0.679843784 | -0.311219 | 4.94E-05 | hypomethylated |
| cg11815984 | 0.82104 | 0.661725405 | -0.31122  | 0.000209 | hypomethylated |
| cg19307406 | 0.74267 | 0.598478919 | -0.311421 | 9.72E-05 | hypomethylated |
| cg15618336 | 0.90572 | 0.729847568 | -0.31147  | 1.71E-05 | hypomethylated |
| cg24134056 | 0.8229  | 0.663083243 | -0.311527 | 1.25E-05 | hypomethylated |
| cg13798885 | 0.85322 | 0.687480541 | -0.311599 | 0.000152 | hypomethylated |
| cg05935961 | 0.64551 | 0.520113514 | -0.311613 | 0.000369 | hypomethylated |
| cg03216884 | 0.93656 | 0.754604324 | -0.311651 | 1.72E-06 | hypomethylated |
| cg21048812 | 0.8184  | 0.659395676 | -0.311662 | 0.000378 | hypomethylated |
| cg25098478 | 0.61072 | 0.492035676 | -0.311748 | 6.62E-05 | hypomethylated |
| cg00919126 | 0.7232  | 0.582647027 | -0.311773 | 0.00048  | hypomethylated |
| cg19475067 | 0.78269 | 0.630558378 | -0.311811 | 1.08E-05 | hypomethylated |
| cg05308970 | 0.84621 | 0.681700541 | -0.311878 | 2.23E-06 | hypomethylated |
| cg11633264 | 0.60248 | 0.485287568 | -0.312073 | 0.001212 | hypomethylated |
| cg24729988 | 0.81522 | 0.656638378 | -0.31209  | 2.24E-05 | hypomethylated |
| cg11105610 | 0.68398 | 0.550919459 | -0.312113 | 0.000271 | hypomethylated |
| cg02950892 | 0.71484 | 0.575756757 | -0.312161 | 0.00028  | hypomethylated |
| cg15190149 | 0.86015 | 0.692714595 | -0.312327 | 2.51E-05 | hypomethylated |
| cg03150409 | 0.82869 | 0.667341081 | -0.312408 | 8.84E-05 | hypomethylated |
| cg00736104 | 0.73278 | 0.590049189 | -0.312545 | 0.001314 | hypomethylated |
| cg04509526 | 0.83514 | 0.672446486 | -0.312599 | 3.49E-05 | hypomethylated |
| cg03513893 | 0.83957 | 0.675993514 | -0.312641 | 6.75E-06 | hypomethylated |
| cg12600109 | 0.98113 | 0.789959459 | -0.312666 | 8.26E-06 | hypomethylated |
| cg12556823 | 0.92505 | 0.7448      | -0.312678 | 2.10E-06 | hypomethylated |
| cg04755561 | 0.75226 | 0.605645405 | -0.312758 | 0.00028  | hypomethylated |
| cg00082285 | 0.74369 | 0.598728649 | -0.312799 | 1.82E-05 | hypomethylated |
| cg08711320 | 0.87293 | 0.702689189 | -0.312979 | 7.56E-05 | hypomethylated |
| cg09785394 | 0.70539 | 0.567787027 | -0.313071 | 0.00039  | hypomethylated |
| cg17121205 | 0.84993 | 0.684128108 | -0.313078 | 3.04E-05 | hypomethylated |
| cg18770029 | 0.75993 | 0.611673514 | -0.313105 | 0.000137 | hypomethylated |
| cg00004562 | 0.78599 | 0.632641622 | -0.313122 | 1.40E-05 | hypomethylated |
| cg24889829 | 0.88587 | 0.712921081 | -0.313353 | 6.57E-06 | hypomethylated |
| cg27651070 | 0.66857 | 0.538021622 | -0.313414 | 2.27E-05 | hypomethylated |
| cg18049474 | 0.71038 | 0.571634054 | -0.313499 | 6.38E-05 | hypomethylated |



|            |         |             |           |          |                |
|------------|---------|-------------|-----------|----------|----------------|
| cg14406501 | 0.82033 | 0.660105405 | -0.313508 | 9.27E-05 | hypomethylated |
| cg03457984 | 0.83258 | 0.669960541 | -0.313513 | 4.70E-05 | hypomethylated |
| cg03525467 | 0.72841 | 0.586117838 | -0.31356  | 2.45E-05 | hypomethylated |
| cg19293162 | 0.68072 | 0.54769027  | -0.313701 | 0.000109 | hypomethylated |
| cg04753836 | 0.71956 | 0.578938378 | -0.313705 | 0.00024  | hypomethylated |
| cg26117369 | 0.78822 | 0.634175676 | -0.313716 | 0.00039  | hypomethylated |
| cg00107241 | 0.85419 | 0.687224865 | -0.313775 | 0.000191 | hypomethylated |
| cg26560699 | 0.83257 | 0.669818378 | -0.313802 | 5.32E-05 | hypomethylated |
| cg04946315 | 0.73081 | 0.587936757 | -0.313835 | 0.000523 | hypomethylated |
| cg12978582 | 0.62487 | 0.502695135 | -0.313872 | 0.000242 | hypomethylated |
| cg17277248 | 0.88998 | 0.715950811 | -0.313912 | 2.61E-05 | hypomethylated |
| cg25591377 | 0.89607 | 0.72082     | -0.313972 | 4.60E-06 | hypomethylated |
| cg03130962 | 0.68292 | 0.549300541 | -0.314121 | 0.000154 | hypomethylated |
| cg17619755 | 0.7814  | 0.628486486 | -0.31418  | 0.000154 | hypomethylated |
| cg06516820 | 0.76022 | 0.611421622 | -0.314249 | 9.31E-06 | hypomethylated |
| cg09097916 | 0.77482 | 0.623161622 | -0.314255 | 0.000191 | hypomethylated |
| cg14220678 | 0.74065 | 0.595678919 | -0.314257 | 0.001118 | hypomethylated |
| cg11143092 | 0.76372 | 0.614228108 | -0.314269 | 0.000338 | hypomethylated |
| cg15851278 | 0.81184 | 0.652928108 | -0.314271 | 5.00E-05 | hypomethylated |
| cg16149437 | 0.74441 | 0.598676757 | -0.31432  | 0.001063 | hypomethylated |
| cg01928143 | 0.92767 | 0.746050811 | -0.314338 | 1.58E-05 | hypomethylated |
| cg03262802 | 0.73447 | 0.590609189 | -0.3145   | 7.12E-05 | hypomethylated |
| cg17767484 | 0.84502 | 0.679467568 | -0.314581 | 0.000143 | hypomethylated |
| cg06042156 | 0.63971 | 0.514372973 | -0.314603 | 0.000195 | hypomethylated |
| cg09709565 | 0.77766 | 0.625241081 | -0.314727 | 0.000251 | hypomethylated |
| cg16685586 | 0.86    | 0.691418378 | -0.314778 | 4.05E-05 | hypomethylated |
| cg02229288 | 0.80918 | 0.650558919 | -0.314781 | 0.000653 | hypomethylated |
| cg06204229 | 0.82239 | 0.661178378 | -0.314783 | 7.72E-06 | hypomethylated |
| cg13906098 | 0.82605 | 0.664098378 | -0.314832 | 0.000204 | hypomethylated |
| cg07481027 | 0.85076 | 0.683904324 | -0.314958 | 0.000148 | hypomethylated |
| cg09686390 | 0.70626 | 0.567731892 | -0.31499  | 0.000229 | hypomethylated |
| cg07813495 | 0.69165 | 0.555975135 | -0.315022 | 0.002168 | hypomethylated |
| cg01145653 | 0.87681 | 0.704792432 | -0.315066 | 3.32E-05 | hypomethylated |
| cg18045152 | 0.79569 | 0.639568649 | -0.315107 | 2.78E-05 | hypomethylated |
| cg06700061 | 0.90562 | 0.727928649 | -0.315109 | 3.04E-05 | hypomethylated |
| cg22939709 | 0.7865  | 0.632177838 | -0.315116 | 8.84E-05 | hypomethylated |
| cg10940251 | 0.64115 | 0.515303243 | -0.31524  | 0.000265 | hypomethylated |
| cg22478258 | 0.6461  | 0.519256216 | -0.315311 | 0.000464 | hypomethylated |
| cg23181035 | 0.64625 | 0.519338378 | -0.315418 | 0.000251 | hypomethylated |
| cg04388863 | 0.86348 | 0.693890811 | -0.315454 | 3.19E-05 | hypomethylated |
| cg09501282 | 0.82077 | 0.659552432 | -0.315491 | 6.15E-05 | hypomethylated |
| cg21407354 | 0.86203 | 0.692703784 | -0.3155   | 5.86E-05 | hypomethylated |
| cg10102736 | 0.78515 | 0.630922162 | -0.315506 | 9.57E-06 | hypomethylated |
| cg19979896 | 0.8144  | 0.654423784 | -0.315512 | 0.000293 | hypomethylated |
| cg10481560 | 0.85476 | 0.686826486 | -0.315574 | 1.46E-05 | hypomethylated |
| cg08666707 | 0.54107 | 0.434757838 | -0.315603 | 0.000229 | hypomethylated |
| cg00906908 | 0.82046 | 0.65924973  | -0.315608 | 0.000174 | hypomethylated |
| cg18128976 | 0.83207 | 0.668551351 | -0.315667 | 2.92E-05 | hypomethylated |
| cg26681123 | 0.79203 | 0.636327027 | -0.315787 | 1.09E-05 | hypomethylated |
| cg18061140 | 0.88335 | 0.709676216 | -0.315824 | 1.05E-06 | hypomethylated |
| cg10715147 | 0.90956 | 0.730695676 | -0.315898 | 3.32E-05 | hypomethylated |
| cg26155170 | 0.72927 | 0.585832973 | -0.315964 | 0.000335 | hypomethylated |
| cg09596131 | 0.77436 | 0.622022162 | -0.316038 | 0.003255 | hypomethylated |
| cg24312489 | 0.6152  | 0.494150811 | -0.316104 | 0.000667 | hypomethylated |
| cg09957933 | 0.8676  | 0.696858378 | -0.316165 | 3.67E-05 | hypomethylated |
| cg14029117 | 0.74224 | 0.596167568 | -0.316168 | 8.13E-05 | hypomethylated |
| cg24691965 | 0.86685 | 0.696248649 | -0.31618  | 3.40E-05 | hypomethylated |
| cg11067179 | 0.7512  | 0.603267027 | -0.3164   | 0.000358 | hypomethylated |

|            |         |             |           |          |                |
|------------|---------|-------------|-----------|----------|----------------|
| cg00549601 | 0.74463 | 0.597974054 | -0.316441 | 0.000256 | hypomethylated |
| cg10963033 | 0.87212 | 0.700345946 | -0.316459 | 2.27E-05 | hypomethylated |
| cg08458733 | 0.6585  | 0.52877027  | -0.316542 | 0.001041 | hypomethylated |
| cg13705014 | 0.94062 | 0.755306486 | -0.31655  | 3.53E-05 | hypomethylated |
| cg22717593 | 0.79007 | 0.634392432 | -0.316605 | 0.000224 | hypomethylated |
| cg09205751 | 0.75413 | 0.605515135 | -0.31665  | 0.000182 | hypomethylated |
| cg03264209 | 0.58208 | 0.467352973 | -0.316705 | 0.000117 | hypomethylated |
| cg22919908 | 0.71568 | 0.5746      | -0.316757 | 9.05E-05 | hypomethylated |
| cg08378932 | 0.78605 | 0.631092432 | -0.31677  | 1.71E-05 | hypomethylated |
| cg18289306 | 0.76788 | 0.616503784 | -0.316771 | 8.42E-05 | hypomethylated |
| cg03550233 | 0.57565 | 0.462162703 | -0.316791 | 0.001327 | hypomethylated |
| cg25616918 | 0.8492  | 0.681773514 | -0.316812 | 0.000117 | hypomethylated |
| cg22584435 | 0.74292 | 0.596436216 | -0.316839 | 5.86E-05 | hypomethylated |
| cg16668903 | 0.8004  | 0.642541622 | -0.316931 | 2.81E-05 | hypomethylated |
| cg08245989 | 0.79317 | 0.636700541 | -0.317015 | 2.51E-05 | hypomethylated |
| cg02915739 | 0.64088 | 0.51445027  | -0.317023 | 0.000165 | hypomethylated |
| cg21399807 | 0.90786 | 0.728761622 | -0.317023 | 1.68E-05 | hypomethylated |
| cg09674500 | 0.89737 | 0.720333514 | -0.317038 | 1.35E-05 | hypomethylated |
| cg03750061 | 0.84153 | 0.67544973  | -0.317166 | 0.000107 | hypomethylated |
| cg00500770 | 0.78577 | 0.630688649 | -0.317179 | 0.000226 | hypomethylated |
| cg12795208 | 0.82909 | 0.665423243 | -0.317256 | 4.36E-05 | hypomethylated |
| cg15369784 | 0.86452 | 0.693806486 | -0.317366 | 1.06E-05 | hypomethylated |
| cg03126567 | 0.84597 | 0.678824324 | -0.317568 | 7.65E-05 | hypomethylated |
| cg13521045 | 0.83995 | 0.673981081 | -0.317595 | 1.54E-05 | hypomethylated |
| cg21242002 | 0.65695 | 0.5271      | -0.317707 | 0.001225 | hypomethylated |
| cg22208304 | 0.95361 | 0.765108649 | -0.317735 | 1.04E-05 | hypomethylated |
| cg14258078 | 0.86258 | 0.692022703 | -0.317839 | 3.00E-05 | hypomethylated |
| cg20731031 | 0.86366 | 0.692848649 | -0.317923 | 1.48E-05 | hypomethylated |
| cg02790458 | 0.67069 | 0.53802     | -0.317986 | 0.00012  | hypomethylated |
| cg17218041 | 0.75337 | 0.604278919 | -0.318144 | 0.000251 | hypomethylated |
| cg18741321 | 0.7946  | 0.637344324 | -0.318156 | 7.12E-06 | hypomethylated |
| cg13155549 | 0.63794 | 0.511655135 | -0.318249 | 0.000148 | hypomethylated |
| cg27437413 | 0.92089 | 0.738544865 | -0.318343 | 4.73E-06 | hypomethylated |
| cg22123459 | 0.54428 | 0.43648     | -0.318433 | 0.00039  | hypomethylated |
| cg21773820 | 0.84051 | 0.674011351 | -0.318492 | 0.000106 | hypomethylated |
| cg13970540 | 0.80451 | 0.645136216 | -0.318507 | 3.07E-05 | hypomethylated |
| cg23696864 | 0.91113 | 0.73063027  | -0.318515 | 2.49E-06 | hypomethylated |
| cg03003746 | 0.92001 | 0.737730811 | -0.318555 | 1.93E-06 | hypomethylated |
| cg00334507 | 0.79698 | 0.639073514 | -0.318562 | 0.000331 | hypomethylated |
| cg23059701 | 0.87479 | 0.70144973  | -0.318597 | 1.12E-05 | hypomethylated |
| cg00232105 | 0.6554  | 0.525500541 | -0.318683 | 0.000122 | hypomethylated |
| cg04896048 | 0.92147 | 0.738817297 | -0.31872  | 0.000126 | hypomethylated |
| cg13525397 | 0.66119 | 0.530123243 | -0.318737 | 0.000421 | hypomethylated |
| cg09025071 | 0.75696 | 0.606888649 | -0.318785 | 0.000517 | hypomethylated |
| cg00619263 | 0.77453 | 0.620972973 | -0.318791 | 0.000517 | hypomethylated |
| cg18645316 | 0.82384 | 0.660432973 | -0.318952 | 6.31E-05 | hypomethylated |
| cg17165158 | 0.94523 | 0.75771027  | -0.319019 | 5.72E-05 | hypomethylated |
| cg22007638 | 0.70885 | 0.568208108 | -0.319061 | 1.14E-05 | hypomethylated |
| cg16901862 | 0.80855 | 0.64810973  | -0.319099 | 0.000517 | hypomethylated |
| cg10599446 | 0.85848 | 0.688125946 | -0.319112 | 2.10E-05 | hypomethylated |
| cg02800711 | 0.92438 | 0.740876216 | -0.319254 | 2.99E-06 | hypomethylated |
| cg03318428 | 0.88592 | 0.710048649 | -0.319259 | 8.73E-05 | hypomethylated |
| cg24634577 | 0.82533 | 0.661473514 | -0.319288 | 2.64E-05 | hypomethylated |
| cg18009575 | 0.78119 | 0.626093514 | -0.319295 | 0.000204 | hypomethylated |
| cg27124512 | 0.71019 | 0.569189189 | -0.319297 | 0.000274 | hypomethylated |
| cg14699839 | 0.79671 | 0.638523784 | -0.319314 | 3.19E-05 | hypomethylated |
| cg23726483 | 0.77576 | 0.62171027  | -0.319368 | 7.47E-05 | hypomethylated |
| cg27583604 | 0.77306 | 0.619520541 | -0.319428 | 0.000229 | hypomethylated |

|            |         |             |           |          |                |
|------------|---------|-------------|-----------|----------|----------------|
| cg18909903 | 0.7353  | 0.58924973  | -0.319454 | 1.77E-05 | hypomethylated |
| cg19382019 | 0.84646 | 0.67832973  | -0.319455 | 4.36E-05 | hypomethylated |
| cg15218995 | 0.78659 | 0.630342703 | -0.319475 | 8.13E-05 | hypomethylated |
| cg22170599 | 0.89182 | 0.714651351 | -0.319513 | 5.00E-05 | hypomethylated |
| cg08265495 | 0.77745 | 0.622971892 | -0.319583 | 0.0002   | hypomethylated |
| cg13124080 | 0.84667 | 0.678431351 | -0.319597 | 1.71E-05 | hypomethylated |
| cg18594482 | 0.89297 | 0.715489189 | -0.319682 | 0.000117 | hypomethylated |
| cg04774822 | 0.79809 | 0.639458378 | -0.319701 | 0.000135 | hypomethylated |
| cg08628580 | 0.88507 | 0.709121081 | -0.31976  | 9.05E-05 | hypomethylated |
| cg19100772 | 0.73933 | 0.592352432 | -0.319763 | 0.000142 | hypomethylated |
| cg18402166 | 0.71169 | 0.570132973 | -0.319951 | 0.000145 | hypomethylated |
| cg21860285 | 0.73623 | 0.589779459 | -0.319981 | 5.25E-05 | hypomethylated |
| cg02735733 | 0.84583 | 0.677532432 | -0.320078 | 9.72E-05 | hypomethylated |
| cg26227592 | 0.62396 | 0.499807568 | -0.320081 | 2.48E-05 | hypomethylated |
| cg10994870 | 0.63253 | 0.506665405 | -0.320101 | 0.000369 | hypomethylated |
| cg08051604 | 0.80974 | 0.64860973  | -0.320108 | 0.0006   | hypomethylated |
| cg24707640 | 0.84445 | 0.676331351 | -0.320282 | 1.14E-05 | hypomethylated |
| cg15554087 | 0.87961 | 0.704465405 | -0.320335 | 9.66E-07 | hypomethylated |
| cg25372195 | 0.80264 | 0.642819459 | -0.320339 | 8.84E-05 | hypomethylated |
| cg22329555 | 0.59124 | 0.473497838 | -0.320386 | 2.92E-05 | hypomethylated |
| cg17181043 | 0.88078 | 0.705268108 | -0.32061  | 6.01E-05 | hypomethylated |
| cg13201644 | 0.82244 | 0.658483784 | -0.320763 | 0.000262 | hypomethylated |
| cg14759277 | 0.94417 | 0.7559      | -0.320851 | 0.000202 | hypomethylated |
| cg07824081 | 0.60503 | 0.484380541 | -0.320866 | 0.000112 | hypomethylated |
| cg00390484 | 0.879   | 0.703688108 | -0.320927 | 0.000251 | hypomethylated |
| cg23908385 | 0.78    | 0.624417297 | -0.320964 | 9.49E-05 | hypomethylated |
| cg13680200 | 0.79719 | 0.638148108 | -0.321032 | 0.000417 | hypomethylated |
| cg22112110 | 0.86391 | 0.691512432 | -0.321126 | 5.72E-05 | hypomethylated |
| cg22380322 | 0.73137 | 0.585416216 | -0.321139 | 0.000772 | hypomethylated |
| cg16313944 | 0.66413 | 0.53158973  | -0.321152 | 2.10E-05 | hypomethylated |
| cg14737704 | 0.66726 | 0.534092432 | -0.32116  | 0.00054  | hypomethylated |
| cg13152690 | 0.76764 | 0.614389189 | -0.321277 | 0.00291  | hypomethylated |
| cg17890298 | 0.70459 | 0.563917297 | -0.3213   | 0.000104 | hypomethylated |
| cg05591210 | 0.8621  | 0.689938919 | -0.321387 | 2.89E-05 | hypomethylated |
| cg21308656 | 0.90519 | 0.724417838 | -0.321399 | 2.57E-05 | hypomethylated |
| cg18898209 | 0.82484 | 0.660014054 | -0.321618 | 3.44E-05 | hypomethylated |
| cg09950076 | 0.91567 | 0.732684324 | -0.321636 | 1.40E-05 | hypomethylated |
| cg15006681 | 0.69957 | 0.559711351 | -0.321785 | 4.26E-05 | hypomethylated |
| cg03702686 | 0.75999 | 0.608017297 | -0.321868 | 0.000152 | hypomethylated |
| cg13727473 | 0.74258 | 0.59406     | -0.321938 | 0.000145 | hypomethylated |
| cg10773266 | 0.76015 | 0.60811027  | -0.321951 | 0.01146  | hypomethylated |
| cg17031787 | 0.74424 | 0.59534973  | -0.322031 | 0.000296 | hypomethylated |
| cg16118839 | 0.77659 | 0.621197297 | -0.322102 | 0.000893 | hypomethylated |
| cg00912580 | 0.68513 | 0.548028108 | -0.322128 | 0.001301 | hypomethylated |
| cg10549071 | 0.82324 | 0.658496757 | -0.322137 | 8.63E-05 | hypomethylated |
| cg14520913 | 0.81481 | 0.651749189 | -0.322147 | 0.000174 | hypomethylated |
| cg25345746 | 0.85468 | 0.68359027  | -0.322253 | 2.67E-05 | hypomethylated |
| cg04602081 | 0.89205 | 0.713475135 | -0.322261 | 2.67E-05 | hypomethylated |
| cg20951054 | 0.7867  | 0.629156757 | -0.322394 | 2.51E-05 | hypomethylated |
| cg05295841 | 0.89814 | 0.718197297 | -0.32256  | 9.27E-05 | hypomethylated |
| cg13598881 | 0.79647 | 0.636883243 | -0.322591 | 8.84E-05 | hypomethylated |
| cg16239278 | 0.89537 | 0.715913514 | -0.322699 | 5.45E-05 | hypomethylated |
| cg12425700 | 0.81177 | 0.649050811 | -0.32274  | 7.83E-06 | hypomethylated |
| cg20212364 | 0.88432 | 0.707014595 | -0.322829 | 2.38E-05 | hypomethylated |
| cg15374518 | 0.7831  | 0.626076757 | -0.322857 | 0.000506 | hypomethylated |
| cg13487334 | 0.76378 | 0.61062973  | -0.322859 | 2.64E-05 | hypomethylated |
| cg23091122 | 0.7812  | 0.624527568 | -0.322927 | 6.08E-05 | hypomethylated |
| cg15450966 | 0.52506 | 0.419756757 | -0.322929 | 0.0002   | hypomethylated |

|            |         |             |           |          |                |
|------------|---------|-------------|-----------|----------|----------------|
| cg03126633 | 0.66904 | 0.534853514 | -0.322949 | 0.000155 | hypomethylated |
| cg22075924 | 0.66246 | 0.529591892 | -0.322952 | 0.000435 | hypomethylated |
| cg15209376 | 0.83669 | 0.668825405 | -0.323064 | 3.85E-05 | hypomethylated |
| cg09924848 | 0.75628 | 0.604534595 | -0.323096 | 0.000346 | hypomethylated |
| cg24160371 | 0.85816 | 0.685959459 | -0.323123 | 5.25E-05 | hypomethylated |
| cg14975547 | 0.84072 | 0.672017838 | -0.323126 | 7.84E-05 | hypomethylated |
| cg04848426 | 0.88951 | 0.711007568 | -0.323146 | 2.45E-05 | hypomethylated |
| cg14779271 | 0.81178 | 0.648833514 | -0.32324  | 5.38E-05 | hypomethylated |
| cg23001905 | 0.87774 | 0.701543784 | -0.323261 | 1.23E-05 | hypomethylated |
| cg19488206 | 0.59693 | 0.477101081 | -0.323267 | 7.47E-05 | hypomethylated |
| cg14350257 | 0.78628 | 0.628410811 | -0.323335 | 3.81E-05 | hypomethylated |
| cg26070865 | 0.59967 | 0.479259459 | -0.323362 | 0.000893 | hypomethylated |
| cg19865472 | 0.92035 | 0.735545946 | -0.323367 | 0.000147 | hypomethylated |
| cg08917664 | 0.91465 | 0.730953514 | -0.32344  | 3.26E-06 | hypomethylated |
| cg09910207 | 0.8642  | 0.6906      | -0.323515 | 1.28E-05 | hypomethylated |
| cg12409874 | 0.89911 | 0.718481081 | -0.323547 | 3.44E-05 | hypomethylated |
| cg12038298 | 0.70994 | 0.567272432 | -0.323655 | 0.000142 | hypomethylated |
| cg17373759 | 0.85657 | 0.684414054 | -0.323702 | 8.63E-05 | hypomethylated |
| cg23205936 | 0.82607 | 0.660031892 | -0.323728 | 0.00032  | hypomethylated |
| cg09773473 | 0.90927 | 0.726485405 | -0.323775 | 3.49E-06 | hypomethylated |
| cg05580415 | 0.76232 | 0.609067027 | -0.323796 | 4.47E-05 | hypomethylated |
| cg22643193 | 0.8405  | 0.671522703 | -0.323812 | 1.58E-05 | hypomethylated |
| cg26252045 | 0.86528 | 0.691291892 | -0.323872 | 3.00E-05 | hypomethylated |
| cg09662304 | 0.80326 | 0.641731351 | -0.323898 | 4.47E-05 | hypomethylated |
| cg19038027 | 0.5978  | 0.477582703 | -0.323912 | 0.000195 | hypomethylated |
| cg20333727 | 0.7433  | 0.593769189 | -0.324042 | 1.97E-05 | hypomethylated |
| cg05233946 | 0.80759 | 0.645122162 | -0.324051 | 0.00028  | hypomethylated |
| cg23670188 | 0.77463 | 0.618782703 | -0.324075 | 0.000155 | hypomethylated |
| cg04756594 | 0.77267 | 0.61719027  | -0.324137 | 0.000594 | hypomethylated |
| cg22283058 | 0.77914 | 0.622295676 | -0.324282 | 0.000142 | hypomethylated |
| cg08186915 | 0.68355 | 0.545936216 | -0.324314 | 7.29E-05 | hypomethylated |
| cg24699699 | 0.87983 | 0.70258     | -0.324562 | 1.66E-05 | hypomethylated |
| cg08439439 | 0.87694 | 0.700243784 | -0.324621 | 8.52E-05 | hypomethylated |
| cg22330638 | 0.71358 | 0.569785946 | -0.324655 | 0.000117 | hypomethylated |
| cg19311448 | 0.69545 | 0.555302703 | -0.324672 | 0.000551 | hypomethylated |
| cg26123824 | 0.68721 | 0.548715676 | -0.324692 | 0.00018  | hypomethylated |
| cg14370520 | 0.77528 | 0.619025946 | -0.324718 | 0.00099  | hypomethylated |
| cg05814135 | 0.83216 | 0.66443027  | -0.324743 | 6.01E-05 | hypomethylated |
| cg03259292 | 0.69221 | 0.552684324 | -0.324754 | 0.000293 | hypomethylated |
| cg01902704 | 0.7513  | 0.599801622 | -0.324904 | 0.000358 | hypomethylated |
| cg17936783 | 0.70672 | 0.564204324 | -0.324921 | 0.000224 | hypomethylated |
| cg08809408 | 0.80534 | 0.642905405 | -0.324992 | 4.15E-05 | hypomethylated |
| cg09715545 | 0.73192 | 0.584282703 | -0.325019 | 0.00066  | hypomethylated |
| cg23484912 | 0.88343 | 0.70522     | -0.325042 | 2.51E-05 | hypomethylated |
| cg14548777 | 0.80629 | 0.643616757 | -0.325097 | 2.45E-05 | hypomethylated |
| cg02463513 | 0.88239 | 0.704361081 | -0.325101 | 0.000107 | hypomethylated |
| cg08915438 | 0.6843  | 0.546232973 | -0.325113 | 0.000274 | hypomethylated |
| cg09638264 | 0.8907  | 0.710971351 | -0.325148 | 4.00E-05 | hypomethylated |
| cg16902863 | 0.73844 | 0.589392973 | -0.325251 | 0.00028  | hypomethylated |
| cg22532155 | 0.88315 | 0.704863243 | -0.325315 | 1.04E-05 | hypomethylated |
| cg11173131 | 0.67872 | 0.541672973 | -0.325394 | 0.001587 | hypomethylated |
| cg05492657 | 0.85099 | 0.679147568 | -0.325417 | 1.25E-05 | hypomethylated |
| cg08344174 | 0.89078 | 0.710898378 | -0.325426 | 2.78E-05 | hypomethylated |
| cg01097897 | 0.82061 | 0.654896757 | -0.325429 | 0.000342 | hypomethylated |
| cg27345989 | 0.80608 | 0.643262703 | -0.325515 | 3.95E-05 | hypomethylated |
| cg05998333 | 0.85614 | 0.683198378 | -0.325542 | 1.31E-05 | hypomethylated |
| cg24737570 | 0.73808 | 0.588974054 | -0.325573 | 0.000152 | hypomethylated |
| cg25880347 | 0.72645 | 0.579651892 | -0.325677 | 3.00E-05 | hypomethylated |

|            |         |             |           |          |                |
|------------|---------|-------------|-----------|----------|----------------|
| cg08832596 | 0.51267 | 0.409061622 | -0.325712 | 0.000108 | hypomethylated |
| cg12669088 | 0.86322 | 0.688759459 | -0.325728 | 0.000155 | hypomethylated |
| cg24137216 | 0.8928  | 0.712352973 | -0.325745 | 0.000148 | hypomethylated |
| cg03519180 | 0.82062 | 0.654684865 | -0.325914 | 0.000242 | hypomethylated |
| cg08251025 | 0.86473 | 0.689863243 | -0.325939 | 8.60E-06 | hypomethylated |
| cg06960356 | 0.9116  | 0.727209189 | -0.32603  | 0.000163 | hypomethylated |
| cg10334489 | 0.63902 | 0.50969027  | -0.32624  | 0.000335 | hypomethylated |
| cg12420383 | 0.47353 | 0.377688649 | -0.326258 | 2.27E-05 | hypomethylated |
| cg04544908 | 0.76359 | 0.609016216 | -0.326318 | 0.000147 | hypomethylated |
| cg07897069 | 0.74569 | 0.594705405 | -0.326401 | 0.00039  | hypomethylated |
| cg03453890 | 0.71659 | 0.571458919 | -0.326498 | 2.96E-05 | hypomethylated |
| cg18151262 | 0.7673  | 0.611843243 | -0.326629 | 8.22E-05 | hypomethylated |
| cg16584392 | 0.69943 | 0.557720541 | -0.326637 | 5.79E-05 | hypomethylated |
| cg08463231 | 0.68827 | 0.548804865 | -0.326681 | 0.000262 | hypomethylated |
| cg14575950 | 0.84204 | 0.671356216 | -0.32681  | 0.000102 | hypomethylated |
| cg02340818 | 0.86969 | 0.693383784 | -0.326847 | 0.000202 | hypomethylated |
| cg17333291 | 0.62863 | 0.501189189 | -0.326856 | 4.26E-05 | hypomethylated |
| cg05341549 | 0.63925 | 0.509625946 | -0.326942 | 0.000202 | hypomethylated |
| cg10244770 | 0.88527 | 0.705748108 | -0.326964 | 1.06E-05 | hypomethylated |
| cg08571304 | 0.89064 | 0.710002703 | -0.327018 | 4.80E-06 | hypomethylated |
| cg10009380 | 0.70411 | 0.561275676 | -0.327091 | 0.00071  | hypomethylated |
| cg18810691 | 0.69184 | 0.551480541 | -0.327128 | 0.001803 | hypomethylated |
| cg26568171 | 0.87215 | 0.695191892 | -0.327165 | 4.42E-06 | hypomethylated |
| cg22248286 | 0.7816  | 0.623005946 | -0.327185 | 5.38E-05 | hypomethylated |
| cg02618550 | 0.5638  | 0.449358378 | -0.327317 | 0.000113 | hypomethylated |
| cg01018864 | 0.81065 | 0.646095135 | -0.327333 | 4.58E-05 | hypomethylated |
| cg15423315 | 0.70648 | 0.563054595 | -0.327374 | 0.001354 | hypomethylated |
| cg02990598 | 0.64721 | 0.515814595 | -0.327381 | 4.36E-05 | hypomethylated |
| cg26515162 | 0.94716 | 0.754858919 | -0.327401 | 6.46E-05 | hypomethylated |
| cg20125501 | 0.7945  | 0.633190811 | -0.327407 | 3.27E-05 | hypomethylated |
| cg15339688 | 0.84186 | 0.670928649 | -0.327421 | 2.81E-05 | hypomethylated |
| cg00255699 | 0.82211 | 0.655185946 | -0.327427 | 0.000667 | hypomethylated |
| cg27127272 | 0.79095 | 0.630310811 | -0.327523 | 0.000148 | hypomethylated |
| cg21426065 | 0.97949 | 0.780543784 | -0.327551 | 1.33E-06 | hypomethylated |
| cg17818731 | 0.87036 | 0.693574595 | -0.327561 | 1.42E-05 | hypomethylated |
| cg01920398 | 0.70006 | 0.557843784 | -0.327617 | 2.92E-05 | hypomethylated |
| cg21439481 | 0.7979  | 0.635793514 | -0.32765  | 8.22E-05 | hypomethylated |
| cg12104698 | 0.6478  | 0.516185405 | -0.327659 | 0.001603 | hypomethylated |
| cg10175203 | 0.94338 | 0.751677297 | -0.327726 | 2.95E-06 | hypomethylated |
| cg06069457 | 0.97355 | 0.775671892 | -0.327809 | 4.93E-06 | hypomethylated |
| cg09671309 | 0.87098 | 0.693935135 | -0.327839 | 7.12E-05 | hypomethylated |
| cg06832359 | 0.62589 | 0.498654054 | -0.32787  | 5.86E-05 | hypomethylated |
| cg19087028 | 0.87905 | 0.700342703 | -0.327884 | 6.01E-05 | hypomethylated |
| cg08327038 | 0.78213 | 0.623056216 | -0.328046 | 0.000857 | hypomethylated |
| cg15890469 | 0.68551 | 0.546032973 | -0.32819  | 0.001481 | hypomethylated |
| cg11231434 | 0.966   | 0.769389189 | -0.32831  | 1.23E-05 | hypomethylated |
| cg08610987 | 0.72794 | 0.579687568 | -0.328544 | 0.000575 | hypomethylated |
| cg01487468 | 0.68942 | 0.548892973 | -0.328858 | 0.000204 | hypomethylated |
| cg27303933 | 0.72113 | 0.574124865 | -0.328895 | 0.000112 | hypomethylated |
| cg17949316 | 0.94557 | 0.752811351 | -0.328896 | 9.57E-06 | hypomethylated |
| cg13705810 | 0.73847 | 0.587927568 | -0.328901 | 8.84E-05 | hypomethylated |
| cg18537482 | 0.72083 | 0.573880541 | -0.328909 | 0.000159 | hypomethylated |
| cg21391373 | 0.87639 | 0.697725946 | -0.328913 | 4.86E-06 | hypomethylated |
| cg24069602 | 0.66178 | 0.526864865 | -0.328919 | 0.000221 | hypomethylated |
| cg18448426 | 0.85078 | 0.677286486 | -0.32902  | 8.94E-05 | hypomethylated |
| cg10914667 | 0.84797 | 0.675034595 | -0.329052 | 2.10E-05 | hypomethylated |
| cg01025720 | 0.82865 | 0.659653514 | -0.329054 | 0.000382 | hypomethylated |
| cg22491440 | 0.69276 | 0.551468108 | -0.329078 | 8.84E-05 | hypomethylated |

|            |         |             |           |          |                |
|------------|---------|-------------|-----------|----------|----------------|
| cg01497527 | 0.80517 | 0.640931351 | -0.329124 | 5.19E-05 | hypomethylated |
| cg03660606 | 0.58865 | 0.46855027  | -0.329206 | 7.32E-06 | hypomethylated |
| cg03825810 | 0.73395 | 0.584202703 | -0.329213 | 9.60E-05 | hypomethylated |
| cg20701457 | 0.69882 | 0.556174054 | -0.329384 | 0.003441 | hypomethylated |
| cg17449759 | 0.92138 | 0.733247568 | -0.329496 | 6.75E-06 | hypomethylated |
| cg09167117 | 0.69105 | 0.549941081 | -0.329513 | 0.000234 | hypomethylated |
| cg13562353 | 0.80572 | 0.641182703 | -0.329543 | 6.05E-06 | hypomethylated |
| cg19820705 | 0.53382 | 0.424796216 | -0.329582 | 0.000145 | hypomethylated |
| cg27056501 | 0.89807 | 0.714647027 | -0.329597 | 7.72E-06 | hypomethylated |
| cg07600499 | 0.77435 | 0.616184324 | -0.329624 | 0.000262 | hypomethylated |
| cg10287113 | 0.54298 | 0.432072432 | -0.329626 | 0.000104 | hypomethylated |
| cg24242280 | 0.74792 | 0.595136216 | -0.329664 | 7.72E-06 | hypomethylated |
| cg16983541 | 0.51916 | 0.413105405 | -0.329669 | 7.47E-05 | hypomethylated |
| cg18183240 | 0.86316 | 0.686815135 | -0.329706 | 3.44E-05 | hypomethylated |
| cg27127887 | 0.66381 | 0.528167027 | -0.329776 | 0.000464 | hypomethylated |
| cg26786974 | 0.73988 | 0.588664865 | -0.329845 | 0.000902 | hypomethylated |
| cg04914198 | 0.7525  | 0.598658378 | -0.329959 | 3.57E-05 | hypomethylated |
| cg01647560 | 0.85307 | 0.678658378 | -0.329979 | 3.95E-05 | hypomethylated |
| cg24453438 | 0.81467 | 0.648095135 | -0.33001  | 1.21E-05 | hypomethylated |
| cg14793611 | 0.7544  | 0.600136757 | -0.330038 | 0.000138 | hypomethylated |
| cg04269747 | 0.55691 | 0.44302973  | -0.330041 | 2.64E-05 | hypomethylated |
| cg12681948 | 0.79359 | 0.631205946 | -0.330283 | 0.000459 | hypomethylated |
| cg08119325 | 0.62831 | 0.499741622 | -0.330294 | 0.000259 | hypomethylated |
| cg21566086 | 0.61754 | 0.491157838 | -0.330346 | 0.000449 | hypomethylated |
| cg23919924 | 0.79196 | 0.629862703 | -0.33039  | 7.38E-05 | hypomethylated |
| cg03322234 | 0.71455 | 0.568284324 | -0.330422 | 0.00014  | hypomethylated |
| cg14023573 | 0.86393 | 0.687083243 | -0.33043  | 4.36E-05 | hypomethylated |
| cg10479629 | 0.70342 | 0.559416757 | -0.330463 | 0.00017  | hypomethylated |
| cg20289854 | 0.83065 | 0.660588649 | -0.330489 | 3.85E-05 | hypomethylated |
| cg05136956 | 0.76226 | 0.606175676 | -0.330547 | 1.68E-05 | hypomethylated |
| cg11479568 | 0.69782 | 0.554911351 | -0.330598 | 0.000115 | hypomethylated |
| cg02266878 | 0.76649 | 0.609500541 | -0.330639 | 4.70E-05 | hypomethylated |
| cg13282068 | 0.93786 | 0.745731351 | -0.330717 | 4.01E-06 | hypomethylated |
| cg00300969 | 0.67133 | 0.533795135 | -0.330736 | 0.001368 | hypomethylated |
| cg20597143 | 0.70136 | 0.557662162 | -0.330764 | 9.07E-06 | hypomethylated |
| cg23594208 | 0.83488 | 0.663816757 | -0.330784 | 8.63E-05 | hypomethylated |
| cg26140483 | 0.85852 | 0.682597838 | -0.330816 | 7.47E-05 | hypomethylated |
| cg18927901 | 0.71097 | 0.565278919 | -0.330826 | 5.06E-05 | hypomethylated |
| cg06557580 | 0.84663 | 0.673118919 | -0.33087  | 0.000115 | hypomethylated |
| cg14689365 | 0.64461 | 0.51248     | -0.330931 | 5.65E-05 | hypomethylated |
| cg01727105 | 0.82212 | 0.653603243 | -0.330934 | 1.35E-05 | hypomethylated |
| cg08137852 | 0.7524  | 0.598152973 | -0.330985 | 3.07E-05 | hypomethylated |
| cg27003309 | 0.92992 | 0.739243784 | -0.331056 | 6.15E-05 | hypomethylated |
| cg03028769 | 0.72596 | 0.577054054 | -0.331184 | 0.000251 | hypomethylated |
| cg26013992 | 0.80972 | 0.643598919 | -0.331261 | 0.000399 | hypomethylated |
| cg01963059 | 0.85571 | 0.680128108 | -0.331315 | 4.82E-05 | hypomethylated |
| cg15117681 | 0.73892 | 0.58727027  | -0.331394 | 0.00012  | hypomethylated |
| cg08252585 | 0.91082 | 0.723883243 | -0.331409 | 6.93E-06 | hypomethylated |
| cg08617020 | 0.7948  | 0.631650811 | -0.331465 | 1.31E-05 | hypomethylated |
| cg25852472 | 0.61794 | 0.491094595 | -0.331466 | 0.000174 | hypomethylated |
| cg23935642 | 0.78173 | 0.621232973 | -0.331536 | 0.000313 | hypomethylated |
| cg12108798 | 0.52243 | 0.415167568 | -0.331544 | 4.94E-05 | hypomethylated |
| cg12965095 | 0.95275 | 0.757135676 | -0.331546 | 5.43E-06 | hypomethylated |
| cg17740140 | 0.76612 | 0.608817297 | -0.331561 | 0.000306 | hypomethylated |
| cg18464364 | 0.82693 | 0.657132973 | -0.33158  | 0.000268 | hypomethylated |
| cg25912009 | 0.76003 | 0.60396973  | -0.33158  | 0.000102 | hypomethylated |
| cg06466796 | 0.64297 | 0.510932973 | -0.331617 | 0.00029  | hypomethylated |
| cg09256716 | 0.93275 | 0.741193514 | -0.33164  | 2.04E-06 | hypomethylated |

|            |         |             |           |          |                |
|------------|---------|-------------|-----------|----------|----------------|
| cg08099570 | 0.6344  | 0.504111892 | -0.331649 | 7.47E-05 | hypomethylated |
| cg07217063 | 0.64192 | 0.510083243 | -0.331661 | 2.92E-05 | hypomethylated |
| cg20983876 | 0.82338 | 0.654257838 | -0.331699 | 0.000219 | hypomethylated |
| cg21225563 | 0.68701 | 0.545896216 | -0.331704 | 0.000313 | hypomethylated |
| cg27425383 | 0.7003  | 0.556408108 | -0.33183  | 5.00E-05 | hypomethylated |
| cg25598376 | 0.84029 | 0.667590811 | -0.331923 | 3.76E-05 | hypomethylated |
| cg16769381 | 0.88202 | 0.700723243 | -0.331967 | 1.99E-06 | hypomethylated |
| cg17097293 | 0.76229 | 0.605595135 | -0.331986 | 8.83E-06 | hypomethylated |
| cg09843272 | 0.7651  | 0.607814595 | -0.332017 | 1.25E-05 | hypomethylated |
| cg00739471 | 0.74703 | 0.593407027 | -0.332144 | 0.001987 | hypomethylated |
| cg11797364 | 0.96535 | 0.766827027 | -0.332151 | 6.57E-06 | hypomethylated |
| cg27662789 | 0.70106 | 0.556880541 | -0.33217  | 0.002502 | hypomethylated |
| cg12424383 | 0.77201 | 0.613235676 | -0.332178 | 1.89E-05 | hypomethylated |
| cg15089806 | 0.72374 | 0.574886486 | -0.332194 | 0.000435 | hypomethylated |
| cg08454546 | 0.91856 | 0.729606486 | -0.332255 | 1.18E-06 | hypomethylated |
| cg22169874 | 0.7593  | 0.603104324 | -0.332262 | 2.15E-05 | hypomethylated |
| cg05796178 | 0.78526 | 0.623691892 | -0.332337 | 0.000166 | hypomethylated |
| cg25182621 | 0.67047 | 0.532515676 | -0.332349 | 9.49E-05 | hypomethylated |
| cg26274929 | 0.58636 | 0.465706486 | -0.332366 | 0.000106 | hypomethylated |
| cg02522367 | 0.86208 | 0.684648108 | -0.332459 | 0.000142 | hypomethylated |
| cg14585892 | 0.78776 | 0.625601081 | -0.332513 | 3.49E-06 | hypomethylated |
| cg20118577 | 0.80438 | 0.638798919 | -0.332515 | 8.83E-06 | hypomethylated |
| cg26343761 | 0.83721 | 0.664870811 | -0.332516 | 1.15E-05 | hypomethylated |
| cg18982477 | 0.92555 | 0.735011892 | -0.332543 | 4.36E-06 | hypomethylated |
| cg25658010 | 0.77962 | 0.619115135 | -0.332563 | 1.04E-05 | hypomethylated |
| cg11708690 | 0.78351 | 0.622197297 | -0.33258  | 3.76E-05 | hypomethylated |
| cg18018913 | 0.95371 | 0.757308649 | -0.332669 | 1.96E-06 | hypomethylated |
| cg14578311 | 0.87807 | 0.69720973  | -0.332743 | 1.97E-05 | hypomethylated |
| cg07781701 | 0.86688 | 0.688297838 | -0.332799 | 5.06E-05 | hypomethylated |
| cg05653887 | 0.77394 | 0.614459459 | -0.332904 | 4.47E-05 | hypomethylated |
| cg15608892 | 0.6852  | 0.543987027 | -0.332953 | 2.96E-05 | hypomethylated |
| cg14950134 | 0.66347 | 0.526725405 | -0.33298  | 9.27E-05 | hypomethylated |
| cg23743114 | 0.88803 | 0.704996757 | -0.332992 | 4.05E-05 | hypomethylated |
| cg01529404 | 0.75957 | 0.603004865 | -0.333013 | 0.000454 | hypomethylated |
| cg20537521 | 0.85739 | 0.680657297 | -0.333023 | 2.10E-05 | hypomethylated |
| cg14555350 | 0.66298 | 0.52632     | -0.333025 | 0.00017  | hypomethylated |
| cg22442617 | 0.81704 | 0.648548108 | -0.333193 | 0.000161 | hypomethylated |
| cg13026772 | 0.84067 | 0.667254595 | -0.333302 | 1.71E-05 | hypomethylated |
| cg08582840 | 0.73892 | 0.58647027  | -0.33336  | 5.45E-05 | hypomethylated |
| cg11218561 | 0.83118 | 0.659687568 | -0.333378 | 8.22E-05 | hypomethylated |
| cg14947846 | 0.77209 | 0.61274973  | -0.333471 | 0.000155 | hypomethylated |
| cg20445197 | 0.68691 | 0.545142162 | -0.333489 | 0.000142 | hypomethylated |
| cg25697881 | 0.73062 | 0.57983027  | -0.333491 | 8.84E-05 | hypomethylated |
| cg19698340 | 0.87025 | 0.690627027 | -0.333523 | 2.45E-05 | hypomethylated |
| cg07461273 | 0.58369 | 0.463211892 | -0.33353  | 6.15E-05 | hypomethylated |
| cg06292312 | 0.80566 | 0.639337838 | -0.333593 | 1.20E-05 | hypomethylated |
| cg11566152 | 0.8211  | 0.651571892 | -0.333634 | 0.000109 | hypomethylated |
| cg12145564 | 0.73998 | 0.587152432 | -0.333751 | 0.000191 | hypomethylated |
| cg05122040 | 0.86436 | 0.685835676 | -0.333769 | 4.36E-05 | hypomethylated |
| cg08382072 | 0.87472 | 0.694055676 | -0.33377  | 1.17E-05 | hypomethylated |
| cg21637761 | 0.70638 | 0.560452973 | -0.333851 | 0.001164 | hypomethylated |
| cg05261349 | 0.6841  | 0.542726486 | -0.333982 | 3.95E-05 | hypomethylated |
| cg18564167 | 0.88723 | 0.703857838 | -0.334024 | 0.000107 | hypomethylated |
| cg18644782 | 0.79901 | 0.63386     | -0.334049 | 3.85E-05 | hypomethylated |
| cg11160572 | 0.89303 | 0.708426486 | -0.33409  | 8.03E-05 | hypomethylated |
| cg22845912 | 0.76686 | 0.608316216 | -0.334142 | 0.000245 | hypomethylated |
| cg08479629 | 0.73346 | 0.581781081 | -0.334242 | 1.77E-05 | hypomethylated |
| cg22862003 | 0.612   | 0.485437297 | -0.334247 | 0.001511 | hypomethylated |

|            |         |             |           |          |                |
|------------|---------|-------------|-----------|----------|----------------|
| cg00550340 | 0.68999 | 0.547283243 | -0.334288 | 0.000317 | hypomethylated |
| cg08018143 | 0.69825 | 0.55382     | -0.334327 | 0.000454 | hypomethylated |
| cg22107147 | 0.80614 | 0.639363784 | -0.334393 | 8.22E-05 | hypomethylated |
| cg07479843 | 0.83745 | 0.664096216 | -0.334611 | 8.83E-06 | hypomethylated |
| cg25556051 | 0.81073 | 0.642897297 | -0.334633 | 5.14E-06 | hypomethylated |
| cg15456144 | 0.86714 | 0.687614054 | -0.334666 | 0.000234 | hypomethylated |
| cg08273063 | 0.84418 | 0.669364324 | -0.334759 | 0.000135 | hypomethylated |
| cg17182270 | 0.88257 | 0.699782703 | -0.334804 | 0.000112 | hypomethylated |
| cg18234296 | 0.58443 | 0.463384865 | -0.334819 | 0.000178 | hypomethylated |
| cg23774016 | 0.69375 | 0.550060541 | -0.334825 | 0.000148 | hypomethylated |
| cg17920653 | 0.78024 | 0.618614595 | -0.334877 | 1.44E-05 | hypomethylated |
| cg12592321 | 0.60901 | 0.482797297 | -0.335048 | 0.000204 | hypomethylated |
| cg03903296 | 0.79542 | 0.630537297 | -0.335135 | 5.45E-05 | hypomethylated |
| cg05120428 | 0.60842 | 0.482287027 | -0.335176 | 0.000195 | hypomethylated |
| cg04133293 | 0.9153  | 0.725479459 | -0.33531  | 7.72E-06 | hypomethylated |
| cg11758345 | 0.83327 | 0.66046     | -0.335313 | 3.04E-06 | hypomethylated |
| cg14009561 | 0.78711 | 0.623865946 | -0.335329 | 0.000667 | hypomethylated |
| cg14696926 | 0.80648 | 0.639216757 | -0.335334 | 0.000313 | hypomethylated |
| cg17841440 | 0.65084 | 0.515837297 | -0.335387 | 6.38E-05 | hypomethylated |
| cg03220734 | 0.66256 | 0.525124324 | -0.335392 | 7.56E-05 | hypomethylated |
| cg19225602 | 0.71455 | 0.566299459 | -0.33547  | 0.000435 | hypomethylated |
| cg09360044 | 0.72595 | 0.575310811 | -0.335529 | 0.00097  | hypomethylated |
| cg04510209 | 0.64836 | 0.513812973 | -0.335552 | 5.06E-05 | hypomethylated |
| cg00420347 | 0.827   | 0.65538     | -0.335556 | 1.25E-05 | hypomethylated |
| cg26912314 | 0.80254 | 0.635975676 | -0.335602 | 7.38E-05 | hypomethylated |
| cg18864926 | 0.90646 | 0.718318378 | -0.33562  | 3.85E-05 | hypomethylated |
| cg13389652 | 0.7198  | 0.570394054 | -0.335637 | 0.000163 | hypomethylated |
| cg23219253 | 0.78791 | 0.62432973  | -0.335723 | 8.52E-05 | hypomethylated |
| cg13434764 | 0.75685 | 0.59970973  | -0.335743 | 0.00017  | hypomethylated |
| cg04742977 | 0.77647 | 0.615221081 | -0.335825 | 0.000145 | hypomethylated |
| cg09976157 | 0.87378 | 0.692317297 | -0.335837 | 9.82E-06 | hypomethylated |
| cg10129938 | 0.80872 | 0.640759459 | -0.335857 | 0.000104 | hypomethylated |
| cg18201505 | 0.83725 | 0.663349189 | -0.33589  | 9.44E-06 | hypomethylated |
| cg18399427 | 0.64749 | 0.513003243 | -0.33589  | 3.67E-05 | hypomethylated |
| cg11902180 | 0.76733 | 0.607917838 | -0.335971 | 8.03E-05 | hypomethylated |
| cg12410939 | 0.92946 | 0.736340541 | -0.33602  | 4.36E-06 | hypomethylated |
| cg01561861 | 0.94997 | 0.75256973  | -0.336057 | 8.60E-06 | hypomethylated |
| cg18446110 | 0.69311 | 0.549076757 | -0.336076 | 0.0003   | hypomethylated |
| cg27475923 | 0.7688  | 0.609033514 | -0.336087 | 0.000107 | hypomethylated |
| cg11629955 | 0.86514 | 0.685326486 | -0.336142 | 3.44E-05 | hypomethylated |
| cg11198851 | 0.87083 | 0.689827568 | -0.336155 | 5.73E-06 | hypomethylated |
| cg08123067 | 0.8594  | 0.680758378 | -0.336187 | 4.86E-06 | hypomethylated |
| cg19513727 | 0.71744 | 0.568272973 | -0.336274 | 0.00039  | hypomethylated |
| cg16559570 | 0.81956 | 0.649127027 | -0.336349 | 3.53E-05 | hypomethylated |
| cg17471836 | 0.85601 | 0.677990811 | -0.336362 | 0.00035  | hypomethylated |
| cg06099703 | 0.75711 | 0.59965027  | -0.336382 | 0.000152 | hypomethylated |
| cg06463142 | 0.61046 | 0.483480541 | -0.336439 | 1.31E-05 | hypomethylated |
| cg05990312 | 0.68001 | 0.538558919 | -0.336452 | 0.001875 | hypomethylated |
| cg20811788 | 0.53738 | 0.425576757 | -0.336523 | 0.000145 | hypomethylated |
| cg03955764 | 0.78813 | 0.624128108 | -0.336591 | 0.000145 | hypomethylated |
| cg04355801 | 0.79708 | 0.631203243 | -0.33662  | 3.95E-05 | hypomethylated |
| cg19995049 | 0.89416 | 0.708055676 | -0.33667  | 5.45E-05 | hypomethylated |
| cg16022876 | 0.9353  | 0.740631892 | -0.336673 | 6.39E-06 | hypomethylated |
| cg05306029 | 0.80022 | 0.63364973  | -0.336711 | 0.000613 | hypomethylated |
| cg21617903 | 0.79659 | 0.630767027 | -0.33673  | 2.81E-05 | hypomethylated |
| cg00112341 | 0.66764 | 0.52866     | -0.33673  | 0.001367 | hypomethylated |
| cg08745334 | 0.66987 | 0.530425405 | -0.336731 | 0.00039  | hypomethylated |
| cg06434451 | 0.73692 | 0.583512432 | -0.336745 | 0.000374 | hypomethylated |



|            |         |             |           |          |                |
|------------|---------|-------------|-----------|----------|----------------|
| cg03555157 | 0.63615 | 0.503716757 | -0.336754 | 0.001368 | hypomethylated |
| cg13800802 | 0.86787 | 0.687194595 | -0.33676  | 0.000107 | hypomethylated |
| cg22172610 | 0.75547 | 0.598183243 | -0.336787 | 0.000274 | hypomethylated |
| cg19149463 | 0.76154 | 0.602952973 | -0.336874 | 1.12E-05 | hypomethylated |
| cg00848245 | 0.8272  | 0.654934054 | -0.336887 | 0.000155 | hypomethylated |
| cg18048071 | 0.75951 | 0.601318919 | -0.336939 | 0.001141 | hypomethylated |
| cg23789604 | 0.81977 | 0.648984865 | -0.337034 | 0.000287 | hypomethylated |
| cg15122358 | 0.89146 | 0.705733514 | -0.337047 | 0.000232 | hypomethylated |
| cg20543645 | 0.75685 | 0.599114054 | -0.337177 | 0.000229 | hypomethylated |
| cg04425624 | 0.5677  | 0.449377838 | -0.3372   | 0.001237 | hypomethylated |
| cg07471203 | 0.70823 | 0.560598378 | -0.33725  | 0.000262 | hypomethylated |
| cg23989110 | 0.80481 | 0.637034595 | -0.337277 | 8.42E-05 | hypomethylated |
| cg00071887 | 0.77508 | 0.613480541 | -0.337328 | 3.36E-05 | hypomethylated |
| cg24631065 | 0.85853 | 0.679513514 | -0.337366 | 9.31E-06 | hypomethylated |
| cg05634376 | 0.86887 | 0.687693514 | -0.337375 | 3.19E-05 | hypomethylated |
| cg11422156 | 0.63184 | 0.500076216 | -0.337411 | 0.000408 | hypomethylated |
| cg12020444 | 0.87318 | 0.691085946 | -0.337414 | 3.15E-05 | hypomethylated |
| cg08185255 | 0.68689 | 0.543635676 | -0.337439 | 4.70E-05 | hypomethylated |
| cg06813260 | 0.73395 | 0.58083027  | -0.337565 | 0.000102 | hypomethylated |
| cg21150839 | 0.91114 | 0.721019459 | -0.337635 | 3.39E-06 | hypomethylated |
| cg15864691 | 0.83407 | 0.660025405 | -0.337647 | 0.000182 | hypomethylated |
| cg00294267 | 0.63263 | 0.500612432 | -0.337668 | 2.45E-05 | hypomethylated |
| cg22509816 | 0.87619 | 0.693336757 | -0.337688 | 1.71E-05 | hypomethylated |
| cg06781213 | 0.68301 | 0.540468649 | -0.337696 | 0.000166 | hypomethylated |
| cg08011335 | 0.72217 | 0.571443784 | -0.337727 | 3.62E-05 | hypomethylated |
| cg11313780 | 0.79038 | 0.625385405 | -0.337801 | 0.000219 | hypomethylated |
| cg01274753 | 0.92802 | 0.734285405 | -0.337815 | 0.000274 | hypomethylated |
| cg22209573 | 0.81775 | 0.647003243 | -0.337887 | 6.62E-05 | hypomethylated |
| cg19954234 | 0.88059 | 0.696677838 | -0.337979 | 1.62E-05 | hypomethylated |
| cg26767897 | 0.92523 | 0.731936757 | -0.338093 | 6.39E-06 | hypomethylated |
| cg16511831 | 0.76375 | 0.604175676 | -0.338132 | 6.15E-05 | hypomethylated |
| cg14177084 | 0.65556 | 0.518587568 | -0.33814  | 0.000132 | hypomethylated |
| cg24524485 | 0.81175 | 0.642112432 | -0.33821  | 1.92E-05 | hypomethylated |
| cg06018514 | 0.77569 | 0.613568649 | -0.338255 | 2.92E-05 | hypomethylated |
| cg10787197 | 0.7215  | 0.570698919 | -0.33827  | 0.002699 | hypomethylated |
| cg01129238 | 0.79514 | 0.628935135 | -0.338298 | 0.000262 | hypomethylated |
| cg23535449 | 0.89549 | 0.708214595 | -0.338491 | 7.93E-06 | hypomethylated |
| cg04503319 | 0.68907 | 0.544960541 | -0.338499 | 0.000342 | hypomethylated |
| cg13535903 | 0.66269 | 0.524070811 | -0.338572 | 0.00044  | hypomethylated |
| cg19495444 | 0.7159  | 0.566142703 | -0.338592 | 0.000214 | hypomethylated |
| cg09895653 | 0.64    | 0.506115135 | -0.338606 | 0.000111 | hypomethylated |
| cg16744911 | 0.86114 | 0.680976216 | -0.338643 | 3.40E-05 | hypomethylated |
| cg16265859 | 0.79657 | 0.629914054 | -0.338646 | 0.000374 | hypomethylated |
| cg05363574 | 0.91981 | 0.727335135 | -0.338716 | 6.48E-06 | hypomethylated |
| cg15914863 | 0.66105 | 0.522644865 | -0.338928 | 0.00054  | hypomethylated |
| cg22435313 | 0.83419 | 0.659534054 | -0.338929 | 1.39E-05 | hypomethylated |
| cg07131540 | 0.80373 | 0.635439459 | -0.338956 | 2.15E-05 | hypomethylated |
| cg23160829 | 0.90404 | 0.714743784 | -0.33896  | 6.22E-06 | hypomethylated |
| cg14525390 | 0.88162 | 0.696993514 | -0.339012 | 2.78E-05 | hypomethylated |
| cg09886558 | 0.62484 | 0.493961081 | -0.339089 | 0.000202 | hypomethylated |
| cg14360139 | 0.74974 | 0.592674054 | -0.339151 | 2.64E-05 | hypomethylated |
| cg13588355 | 0.79702 | 0.630001081 | -0.339262 | 4.05E-05 | hypomethylated |
| cg14428628 | 0.83178 | 0.657462703 | -0.339293 | 4.15E-05 | hypomethylated |
| cg06865913 | 0.81033 | 0.640492432 | -0.339328 | 1.62E-05 | hypomethylated |
| cg17141902 | 0.57533 | 0.454736757 | -0.339358 | 0.000342 | hypomethylated |
| cg01594949 | 0.56649 | 0.447734595 | -0.339407 | 0.000386 | hypomethylated |
| cg26433582 | 0.72731 | 0.574832432 | -0.339429 | 0.004059 | hypomethylated |
| cg02652369 | 0.67547 | 0.533825946 | -0.339522 | 0.000268 | hypomethylated |

|            |         |             |           |          |                |
|------------|---------|-------------|-----------|----------|----------------|
| cg26477856 | 0.692   | 0.546871892 | -0.339569 | 0.00098  | hypomethylated |
| cg24688837 | 0.81462 | 0.643774595 | -0.339572 | 7.93E-06 | hypomethylated |
| cg04492496 | 0.66799 | 0.527864324 | -0.339659 | 6.86E-05 | hypomethylated |
| cg19091930 | 0.82898 | 0.655074595 | -0.339678 | 0.000646 | hypomethylated |
| cg14360405 | 0.76439 | 0.604017297 | -0.339719 | 4.47E-05 | hypomethylated |
| cg26244616 | 0.7618  | 0.60196973  | -0.339721 | 9.05E-05 | hypomethylated |
| cg16293118 | 0.74512 | 0.588787027 | -0.339727 | 2.57E-05 | hypomethylated |
| cg19580930 | 0.88827 | 0.701897838 | -0.339737 | 9.72E-05 | hypomethylated |
| cg22601415 | 0.84742 | 0.669603243 | -0.339771 | 0.000256 | hypomethylated |
| cg09363128 | 0.62144 | 0.491009189 | -0.339865 | 2.32E-05 | hypomethylated |
| cg20002381 | 0.82791 | 0.654129189 | -0.339898 | 1.35E-05 | hypomethylated |
| cg21494132 | 0.88442 | 0.698775135 | -0.339903 | 4.47E-05 | hypomethylated |
| cg04057599 | 0.85319 | 0.674086486 | -0.339933 | 6.78E-05 | hypomethylated |
| cg22894276 | 0.74789 | 0.590867027 | -0.339993 | 1.87E-05 | hypomethylated |
| cg13261938 | 0.73806 | 0.583029189 | -0.34017  | 0.000204 | hypomethylated |
| cg17128256 | 0.78903 | 0.623287568 | -0.340182 | 3.79E-06 | hypomethylated |
| cg05892419 | 0.69037 | 0.54534973  | -0.340188 | 0.000155 | hypomethylated |
| cg09983546 | 0.77943 | 0.615701622 | -0.340188 | 6.78E-05 | hypomethylated |
| cg03071876 | 0.71248 | 0.562781081 | -0.340276 | 0.000435 | hypomethylated |
| cg00921973 | 0.80754 | 0.63770973  | -0.340634 | 9.72E-05 | hypomethylated |
| cg08556541 | 0.81014 | 0.639754595 | -0.340653 | 5.25E-05 | hypomethylated |
| cg18047920 | 0.72619 | 0.573439459 | -0.340706 | 2.85E-05 | hypomethylated |
| cg26976108 | 0.73903 | 0.583538378 | -0.340805 | 1.80E-05 | hypomethylated |
| cg04261607 | 0.64135 | 0.506404865 | -0.340821 | 4.70E-05 | hypomethylated |
| cg26552233 | 0.83719 | 0.661014595 | -0.340873 | 0.000207 | hypomethylated |
| cg00232996 | 0.7555  | 0.596514054 | -0.340876 | 0.000132 | hypomethylated |
| cg02473847 | 0.83978 | 0.663057838 | -0.340877 | 0.000109 | hypomethylated |
| cg01952537 | 0.6139  | 0.484710811 | -0.340879 | 0.000126 | hypomethylated |
| cg20359793 | 0.79152 | 0.624936216 | -0.340917 | 1.30E-05 | hypomethylated |
| cg08654262 | 0.85621 | 0.675942703 | -0.341064 | 8.22E-05 | hypomethylated |
| cg06862696 | 0.79893 | 0.630712432 | -0.341087 | 5.58E-05 | hypomethylated |
| cg17438457 | 0.83021 | 0.655395676 | -0.34111  | 3.49E-05 | hypomethylated |
| cg10914815 | 0.77117 | 0.608736757 | -0.34123  | 0.000358 | hypomethylated |
| cg26890181 | 0.69695 | 0.550135135 | -0.341269 | 0.000138 | hypomethylated |
| cg08096702 | 0.92256 | 0.728210811 | -0.341287 | 4.58E-05 | hypomethylated |
| cg04874562 | 0.65839 | 0.519648649 | -0.341406 | 0.000214 | hypomethylated |
| cg17947364 | 0.85175 | 0.672239459 | -0.341455 | 7.12E-05 | hypomethylated |
| cg00555085 | 0.60295 | 0.475835676 | -0.341575 | 0.000313 | hypomethylated |
| cg12468786 | 0.64964 | 0.512680541 | -0.34158  | 8.42E-05 | hypomethylated |
| cg11733958 | 0.72654 | 0.573323784 | -0.341692 | 0.000681 | hypomethylated |
| cg04482760 | 0.83876 | 0.661828649 | -0.3418   | 0.00012  | hypomethylated |
| cg00740389 | 0.9125  | 0.719996757 | -0.341834 | 3.23E-05 | hypomethylated |
| cg26545519 | 0.85229 | 0.672477297 | -0.341859 | 1.84E-05 | hypomethylated |
| cg00868476 | 0.8177  | 0.645168649 | -0.341895 | 4.26E-05 | hypomethylated |
| cg13010373 | 0.77757 | 0.613503784 | -0.3419   | 9.49E-05 | hypomethylated |
| cg27066295 | 0.88535 | 0.698533514 | -0.341919 | 3.04E-05 | hypomethylated |
| cg01300684 | 0.67669 | 0.533868108 | -0.342012 | 0.000106 | hypomethylated |
| cg15091123 | 0.80316 | 0.633627568 | -0.342052 | 1.40E-05 | hypomethylated |
| cg01071644 | 0.57593 | 0.454358378 | -0.342063 | 0.000857 | hypomethylated |
| cg27168858 | 0.75702 | 0.597195676 | -0.342128 | 9.49E-05 | hypomethylated |
| cg11099375 | 0.83003 | 0.654785405 | -0.342141 | 0.00024  | hypomethylated |
| cg12535402 | 0.78934 | 0.622662703 | -0.342196 | 9.49E-05 | hypomethylated |
| cg14370507 | 0.81808 | 0.645317838 | -0.342232 | 0.000229 | hypomethylated |
| cg09423651 | 0.81708 | 0.644514054 | -0.342266 | 0.00031  | hypomethylated |
| cg17929273 | 0.70603 | 0.556911351 | -0.342282 | 7.65E-05 | hypomethylated |
| cg11188031 | 0.92471 | 0.7294      | -0.342291 | 5.58E-06 | hypomethylated |
| cg02076624 | 0.71645 | 0.565101081 | -0.342357 | 0.000159 | hypomethylated |
| cg02995731 | 0.73699 | 0.581278378 | -0.342416 | 1.97E-05 | hypomethylated |

|            |         |             |           |          |                |
|------------|---------|-------------|-----------|----------|----------------|
| cg18195228 | 0.81226 | 0.640641081 | -0.342425 | 2.51E-05 | hypomethylated |
| cg10105268 | 0.90211 | 0.7115      | -0.34244  | 1.25E-05 | hypomethylated |
| cg24647031 | 0.91792 | 0.723921622 | -0.342535 | 3.90E-06 | hypomethylated |
| cg06371582 | 0.78284 | 0.617382703 | -0.342552 | 0.001409 | hypomethylated |
| cg25203007 | 0.57294 | 0.451838378 | -0.342577 | 0.000212 | hypomethylated |
| cg24994360 | 0.64837 | 0.511305405 | -0.342632 | 0.000382 | hypomethylated |
| cg08089543 | 0.53007 | 0.417991351 | -0.34271  | 6.15E-05 | hypomethylated |
| cg23711059 | 0.66951 | 0.527942162 | -0.342726 | 0.0006   | hypomethylated |
| cg21765032 | 0.78938 | 0.622437838 | -0.34279  | 4.70E-05 | hypomethylated |
| cg22745143 | 0.80964 | 0.638398378 | -0.342824 | 0.000224 | hypomethylated |
| cg07229760 | 0.72694 | 0.573169189 | -0.342875 | 5.19E-05 | hypomethylated |
| cg10654948 | 0.90427 | 0.712933514 | -0.342986 | 3.00E-05 | hypomethylated |
| cg21531389 | 0.66086 | 0.521015676 | -0.343018 | 0.007666 | hypomethylated |
| cg01966732 | 0.76271 | 0.601272973 | -0.343115 | 0.00028  | hypomethylated |
| cg04840800 | 0.81915 | 0.645739459 | -0.343175 | 1.15E-05 | hypomethylated |
| cg18297705 | 0.74362 | 0.586165405 | -0.343258 | 3.00E-05 | hypomethylated |
| cg01944226 | 0.86488 | 0.68174     | -0.343278 | 0.0002   | hypomethylated |
| cg17346246 | 0.90227 | 0.711202703 | -0.343298 | 8.84E-05 | hypomethylated |
| cg09414620 | 0.58404 | 0.460353514 | -0.343325 | 0.000303 | hypomethylated |
| cg00201457 | 0.53386 | 0.420792973 | -0.343351 | 0.000195 | hypomethylated |
| cg04804094 | 0.58944 | 0.464594595 | -0.343373 | 7.84E-05 | hypomethylated |
| cg23088810 | 0.86835 | 0.684419459 | -0.343396 | 5.73E-06 | hypomethylated |
| cg24074448 | 0.67107 | 0.528923784 | -0.343403 | 0.00101  | hypomethylated |
| cg13708222 | 0.61107 | 0.481627027 | -0.343421 | 0.000674 | hypomethylated |
| cg12495853 | 0.85187 | 0.671383784 | -0.343496 | 2.21E-05 | hypomethylated |
| cg01662942 | 0.88142 | 0.694636216 | -0.343572 | 2.57E-05 | hypomethylated |
| cg10352418 | 0.87031 | 0.685878919 | -0.343575 | 1.01E-06 | hypomethylated |
| cg16726435 | 0.92644 | 0.7301      | -0.343603 | 3.79E-06 | hypomethylated |
| cg10219995 | 0.69455 | 0.547327568 | -0.343674 | 0.000182 | hypomethylated |
| cg14356530 | 0.66712 | 0.525701622 | -0.343702 | 0.00013  | hypomethylated |
| cg13512859 | 0.52385 | 0.412793514 | -0.343733 | 0.000219 | hypomethylated |
| cg05481579 | 0.77431 | 0.610122162 | -0.343813 | 4.86E-06 | hypomethylated |
| cg02574101 | 0.63972 | 0.504062703 | -0.343837 | 0.000342 | hypomethylated |
| cg08241082 | 0.86742 | 0.683467568 | -0.343858 | 1.62E-05 | hypomethylated |
| cg26342985 | 0.81688 | 0.643642703 | -0.343864 | 0.000134 | hypomethylated |
| cg14438695 | 0.80001 | 0.630349189 | -0.343867 | 0.000155 | hypomethylated |
| cg03562360 | 0.76817 | 0.605194595 | -0.344027 | 0.000229 | hypomethylated |
| cg05869417 | 0.61965 | 0.488182162 | -0.344034 | 0.000857 | hypomethylated |
| cg09060469 | 0.90962 | 0.716593514 | -0.344109 | 4.60E-06 | hypomethylated |
| cg03969763 | 0.77686 | 0.611987568 | -0.344152 | 3.62E-05 | hypomethylated |
| cg01012026 | 0.63267 | 0.498396216 | -0.34416  | 7.29E-05 | hypomethylated |
| cg08597802 | 0.79862 | 0.629098378 | -0.344224 | 0.000113 | hypomethylated |
| cg21643547 | 0.73376 | 0.577985946 | -0.344274 | 9.72E-05 | hypomethylated |
| cg01545079 | 0.81291 | 0.640331892 | -0.344276 | 4.48E-06 | hypomethylated |
| cg18784113 | 0.81274 | 0.64018     | -0.344316 | 9.95E-05 | hypomethylated |
| cg05790960 | 0.76904 | 0.60574973  | -0.344337 | 9.27E-05 | hypomethylated |
| cg08726863 | 0.7435  | 0.585623784 | -0.344359 | 0.00054  | hypomethylated |
| cg00682487 | 0.87658 | 0.690415135 | -0.344422 | 5.14E-06 | hypomethylated |
| cg25214346 | 0.62416 | 0.491596757 | -0.344441 | 0.000214 | hypomethylated |
| cg02871021 | 0.6097  | 0.480193514 | -0.344484 | 0.000369 | hypomethylated |
| cg04478698 | 0.84746 | 0.667338919 | -0.344726 | 5.86E-05 | hypomethylated |
| cg05444541 | 0.70596 | 0.555904324 | -0.34475  | 0.00032  | hypomethylated |
| cg00946479 | 0.80818 | 0.636363784 | -0.344825 | 3.15E-05 | hypomethylated |
| cg04854189 | 0.88707 | 0.698478919 | -0.344831 | 2.87E-06 | hypomethylated |
| cg13185702 | 0.80164 | 0.631204865 | -0.344846 | 0.00017  | hypomethylated |
| cg23154272 | 0.61113 | 0.481163243 | -0.344953 | 5.06E-05 | hypomethylated |
| cg09959684 | 0.82893 | 0.652642162 | -0.344958 | 7.38E-05 | hypomethylated |
| cg15440661 | 0.65441 | 0.515223243 | -0.344997 | 9.83E-05 | hypomethylated |

|            |         |             |           |          |                |
|------------|---------|-------------|-----------|----------|----------------|
| cg23877497 | 0.84318 | 0.663793514 | -0.345106 | 2.04E-05 | hypomethylated |
| cg05625526 | 0.78575 | 0.618578378 | -0.345114 | 9.82E-06 | hypomethylated |
| cg04755857 | 0.83685 | 0.658769189 | -0.345196 | 0.000174 | hypomethylated |
| cg20206377 | 0.5229  | 0.411621081 | -0.345218 | 0.001052 | hypomethylated |
| cg03860038 | 0.87823 | 0.691331892 | -0.34522  | 0.000342 | hypomethylated |
| cg03476212 | 0.72232 | 0.56856     | -0.345326 | 0.000245 | hypomethylated |
| cg10960681 | 0.83906 | 0.660449189 | -0.345326 | 1.28E-05 | hypomethylated |
| cg03992830 | 0.84858 | 0.667938919 | -0.345334 | 2.85E-05 | hypomethylated |
| cg08789739 | 0.92475 | 0.727887027 | -0.345349 | 4.73E-06 | hypomethylated |
| cg04807739 | 0.84758 | 0.667135676 | -0.345369 | 2.49E-06 | hypomethylated |
| cg24506604 | 0.81194 | 0.639082703 | -0.34537  | 2.92E-05 | hypomethylated |
| cg11672772 | 0.84909 | 0.668312432 | -0.345395 | 0.000154 | hypomethylated |
| cg02757488 | 0.5266  | 0.41444     | -0.345544 | 0.000703 | hypomethylated |
| cg16238419 | 0.82052 | 0.645756216 | -0.345549 | 7.52E-06 | hypomethylated |
| cg20802826 | 0.72371 | 0.56953027  | -0.345639 | 0.000251 | hypomethylated |
| cg14195059 | 0.53956 | 0.424607027 | -0.345655 | 0.000123 | hypomethylated |
| cg09164206 | 0.85412 | 0.672141622 | -0.345674 | 0.000187 | hypomethylated |
| cg15450768 | 0.85507 | 0.672862703 | -0.34573  | 4.36E-05 | hypomethylated |
| cg02664479 | 0.73073 | 0.575017297 | -0.345733 | 0.00054  | hypomethylated |
| cg24032414 | 0.82318 | 0.647745405 | -0.345781 | 5.58E-06 | hypomethylated |
| cg01174240 | 0.56122 | 0.44159027  | -0.345858 | 0.000209 | hypomethylated |
| cg25315503 | 0.54986 | 0.432642162 | -0.34589  | 0.000101 | hypomethylated |
| cg03873049 | 0.75291 | 0.592387027 | -0.345937 | 7.29E-05 | hypomethylated |
| cg08264266 | 0.76413 | 0.601212973 | -0.345942 | 0.000123 | hypomethylated |
| cg06786600 | 0.77071 | 0.606378919 | -0.345969 | 0.000124 | hypomethylated |
| cg18202205 | 0.84071 | 0.661451351 | -0.345973 | 4.82E-05 | hypomethylated |
| cg02909097 | 0.75686 | 0.595474054 | -0.345988 | 3.19E-05 | hypomethylated |
| cg12305074 | 0.85292 | 0.67104     | -0.346012 | 0.00029  | hypomethylated |
| cg02034222 | 0.8787  | 0.691241081 | -0.346182 | 6.31E-05 | hypomethylated |
| cg07554496 | 0.92991 | 0.731524324 | -0.346185 | 1.80E-05 | hypomethylated |
| cg19128261 | 0.77001 | 0.605726486 | -0.346211 | 3.57E-05 | hypomethylated |
| cg14321936 | 0.75867 | 0.596798919 | -0.346228 | 3.00E-05 | hypomethylated |
| cg16611584 | 0.68135 | 0.535970811 | -0.346242 | 0.002699 | hypomethylated |
| cg24813588 | 0.66073 | 0.51974     | -0.346271 | 0.000104 | hypomethylated |
| cg16369987 | 0.57485 | 0.452168649 | -0.346325 | 0.000104 | hypomethylated |
| cg16658460 | 0.83548 | 0.657139459 | -0.346406 | 0.000157 | hypomethylated |
| cg14210454 | 0.83308 | 0.655245946 | -0.346419 | 2.42E-05 | hypomethylated |
| cg10959999 | 0.68057 | 0.53528973  | -0.346424 | 4.47E-05 | hypomethylated |
| cg00703843 | 0.83335 | 0.655447568 | -0.346442 | 1.72E-06 | hypomethylated |
| cg15646543 | 0.75172 | 0.591203784 | -0.34654  | 0.000338 | hypomethylated |
| cg00668515 | 0.66504 | 0.523010811 | -0.3466   | 5.72E-05 | hypomethylated |
| cg07285675 | 0.86115 | 0.677226486 | -0.346626 | 3.67E-05 | hypomethylated |
| cg13401658 | 0.8971  | 0.705415676 | -0.346795 | 1.04E-05 | hypomethylated |
| cg00966522 | 0.51307 | 0.403431892 | -0.346831 | 0.000178 | hypomethylated |
| cg21914526 | 0.75538 | 0.593915135 | -0.346946 | 6.23E-05 | hypomethylated |
| cg09480446 | 0.77727 | 0.611099459 | -0.347009 | 0.000216 | hypomethylated |
| cg16179720 | 0.75795 | 0.595895676 | -0.347043 | 0.000251 | hypomethylated |
| cg09213451 | 0.76211 | 0.599153514 | -0.347074 | 0.00054  | hypomethylated |
| cg01411912 | 0.70793 | 0.556557297 | -0.347076 | 7.84E-05 | hypomethylated |
| cg16042652 | 0.81072 | 0.637353514 | -0.34711  | 6.15E-05 | hypomethylated |
| cg25313204 | 0.64342 | 0.505815135 | -0.347151 | 0.001839 | hypomethylated |
| cg19927565 | 0.54539 | 0.42874     | -0.347185 | 0.000191 | hypomethylated |
| cg02179764 | 0.92947 | 0.730648649 | -0.34723  | 7.03E-06 | hypomethylated |
| cg16775939 | 0.95483 | 0.750578919 | -0.34724  | 4.48E-06 | hypomethylated |
| cg03491895 | 0.81044 | 0.637073514 | -0.347246 | 0.000245 | hypomethylated |
| cg07143559 | 0.73981 | 0.581535676 | -0.347287 | 7.12E-05 | hypomethylated |
| cg22249291 | 0.69051 | 0.542772973 | -0.347313 | 2.85E-05 | hypomethylated |
| cg26226988 | 0.84919 | 0.667468649 | -0.347387 | 0.000613 | hypomethylated |

|            |         |             |           |          |                |
|------------|---------|-------------|-----------|----------|----------------|
| cg09617441 | 0.7728  | 0.607421081 | -0.347398 | 9.72E-05 | hypomethylated |
| cg04151220 | 0.83375 | 0.655285946 | -0.34749  | 0.000234 | hypomethylated |
| cg19272720 | 0.73902 | 0.580820541 | -0.347521 | 0.000358 | hypomethylated |
| cg17445212 | 0.73002 | 0.573742162 | -0.347533 | 0.00054  | hypomethylated |
| cg22976120 | 0.75971 | 0.597065946 | -0.347559 | 0.000485 | hypomethylated |
| cg08228672 | 0.708   | 0.556422703 | -0.347568 | 4.15E-05 | hypomethylated |
| cg18855621 | 0.86386 | 0.678911892 | -0.347573 | 1.62E-05 | hypomethylated |
| cg01801826 | 0.72716 | 0.571478378 | -0.347574 | 0.000358 | hypomethylated |
| cg16502747 | 0.58517 | 0.459884324 | -0.347585 | 0.000464 | hypomethylated |
| cg07198365 | 0.93964 | 0.738451892 | -0.347604 | 0.000103 | hypomethylated |
| cg11570656 | 0.53851 | 0.423207027 | -0.34761  | 0.000229 | hypomethylated |
| cg25840824 | 0.82639 | 0.649422162 | -0.347666 | 0.000163 | hypomethylated |
| cg02153041 | 0.66523 | 0.52276973  | -0.347678 | 0.000204 | hypomethylated |
| cg11435441 | 0.86021 | 0.675993514 | -0.347679 | 0.00094  | hypomethylated |
| cg12574576 | 0.72836 | 0.572361081 | -0.347726 | 0.000187 | hypomethylated |
| cg20462100 | 0.66821 | 0.525089189 | -0.347739 | 0.000245 | hypomethylated |
| cg02356435 | 0.81089 | 0.637205405 | -0.347748 | 0.00098  | hypomethylated |
| cg14663208 | 0.84676 | 0.665376757 | -0.347782 | 7.47E-05 | hypomethylated |
| cg15610437 | 0.68615 | 0.539151351 | -0.347834 | 0.000382 | hypomethylated |
| cg10319709 | 0.85496 | 0.671793514 | -0.347839 | 9.72E-05 | hypomethylated |
| cg17810211 | 0.78371 | 0.615764865 | -0.34794  | 0.0003   | hypomethylated |
| cg02678414 | 0.85266 | 0.66993027  | -0.34796  | 3.07E-05 | hypomethylated |
| cg13392029 | 0.66922 | 0.525799459 | -0.347968 | 0.002318 | hypomethylated |
| cg09115713 | 0.86468 | 0.679365405 | -0.347979 | 0.000232 | hypomethylated |
| cg09644157 | 0.6315  | 0.496139459 | -0.348037 | 0.000232 | hypomethylated |
| cg08940169 | 0.7435  | 0.584091351 | -0.348139 | 0.000148 | hypomethylated |
| cg22289115 | 0.66265 | 0.520557838 | -0.348189 | 0.0002   | hypomethylated |
| cg23679992 | 0.6987  | 0.548822703 | -0.348333 | 0.000101 | hypomethylated |
| cg00908813 | 0.87903 | 0.690457297 | -0.34836  | 3.67E-05 | hypomethylated |
| cg22493616 | 0.76493 | 0.600784865 | -0.348479 | 0.000313 | hypomethylated |
| cg22357379 | 0.58794 | 0.461752432 | -0.348549 | 2.10E-05 | hypomethylated |
| cg21584862 | 0.9044  | 0.710271892 | -0.34859  | 2.46E-06 | hypomethylated |
| cg23985077 | 0.85835 | 0.674053514 | -0.348703 | 2.92E-05 | hypomethylated |
| cg02554274 | 0.50552 | 0.396974054 | -0.348723 | 0.003021 | hypomethylated |
| cg19712659 | 0.57959 | 0.455092973 | -0.348871 | 0.000277 | hypomethylated |
| cg26876101 | 0.60124 | 0.472088108 | -0.348885 | 0.000506 | hypomethylated |
| cg04951638 | 0.88027 | 0.691177838 | -0.348889 | 3.30E-06 | hypomethylated |
| cg09892262 | 0.86577 | 0.679763243 | -0.348951 | 1.01E-05 | hypomethylated |
| cg20998127 | 0.85705 | 0.672885946 | -0.349017 | 3.49E-05 | hypomethylated |
| cg19974120 | 0.8145  | 0.639476757 | -0.349023 | 7.12E-05 | hypomethylated |
| cg23894587 | 0.80009 | 0.628148649 | -0.349056 | 4.05E-05 | hypomethylated |
| cg12493906 | 0.85875 | 0.674193514 | -0.349075 | 0.000187 | hypomethylated |
| cg21484512 | 0.7693  | 0.603961622 | -0.349089 | 0.000111 | hypomethylated |
| cg08302325 | 0.59535 | 0.46739027  | -0.34911  | 0.000653 | hypomethylated |
| cg00038857 | 0.81341 | 0.638513514 | -0.349266 | 4.58E-05 | hypomethylated |
| cg22379436 | 0.80558 | 0.632350811 | -0.349303 | 0.000575 | hypomethylated |
| cg13348574 | 0.80218 | 0.629672432 | -0.349324 | 8.63E-05 | hypomethylated |
| cg05164406 | 0.91233 | 0.716125946 | -0.349342 | 5.81E-06 | hypomethylated |
| cg09576223 | 0.70218 | 0.551157838 | -0.349375 | 0.000454 | hypomethylated |
| cg04884612 | 0.80154 | 0.629141081 | -0.349391 | 1.94E-05 | hypomethylated |
| cg03437675 | 0.64492 | 0.506197838 | -0.349419 | 7.74E-05 | hypomethylated |
| cg13901000 | 0.81282 | 0.637978919 | -0.349427 | 0.0002   | hypomethylated |
| cg03080043 | 0.90193 | 0.707894054 | -0.349482 | 3.95E-05 | hypomethylated |
| cg05673731 | 0.77178 | 0.605720541 | -0.349537 | 0.001395 | hypomethylated |
| cg22844623 | 0.74039 | 0.581077838 | -0.349554 | 1.99E-05 | hypomethylated |
| cg24659758 | 0.83955 | 0.658848649 | -0.349669 | 1.75E-05 | hypomethylated |
| cg27478879 | 0.60952 | 0.47831027  | -0.349727 | 6.01E-05 | hypomethylated |
| cg08091707 | 0.66624 | 0.522808649 | -0.349759 | 0.002649 | hypomethylated |

|            |         |             |           |          |                |
|------------|---------|-------------|-----------|----------|----------------|
| cg00657094 | 0.78784 | 0.618229189 | -0.349761 | 7.84E-05 | hypomethylated |
| cg08202972 | 0.77883 | 0.611147568 | -0.349788 | 0.000102 | hypomethylated |
| cg26223797 | 0.88899 | 0.697578919 | -0.349811 | 2.64E-05 | hypomethylated |
| cg17028814 | 0.6963  | 0.546369189 | -0.349833 | 0.000214 | hypomethylated |
| cg02196147 | 0.79167 | 0.621182162 | -0.349883 | 4.47E-05 | hypomethylated |
| cg13511231 | 0.73186 | 0.574206486 | -0.349998 | 0.000152 | hypomethylated |
| cg06466839 | 0.82262 | 0.645385405 | -0.350065 | 0.00039  | hypomethylated |
| cg24866792 | 0.56772 | 0.445400541 | -0.350076 | 8.03E-05 | hypomethylated |
| cg27019158 | 0.8572  | 0.672461081 | -0.350181 | 2.71E-05 | hypomethylated |
| cg27535687 | 0.73358 | 0.575471351 | -0.35021  | 1.58E-05 | hypomethylated |
| cg26608199 | 0.84576 | 0.66345027  | -0.35026  | 5.86E-05 | hypomethylated |
| cg27472701 | 0.93125 | 0.730485405 | -0.350313 | 1.09E-05 | hypomethylated |
| cg23095988 | 0.56146 | 0.440412973 | -0.350326 | 0.000251 | hypomethylated |
| cg25714326 | 0.83525 | 0.655167568 | -0.350344 | 2.51E-05 | hypomethylated |
| cg20468081 | 0.79725 | 0.625268649 | -0.350556 | 2.92E-05 | hypomethylated |
| cg04338119 | 0.80542 | 0.631656216 | -0.350602 | 2.64E-06 | hypomethylated |
| cg01182863 | 0.97848 | 0.767367568 | -0.350625 | 2.95E-06 | hypomethylated |
| cg07679322 | 0.86603 | 0.679176216 | -0.350631 | 1.23E-05 | hypomethylated |
| cg10095801 | 0.74146 | 0.581469189 | -0.350666 | 9.72E-05 | hypomethylated |
| cg00052588 | 0.9211  | 0.722328108 | -0.350703 | 2.68E-06 | hypomethylated |
| cg18503234 | 0.61714 | 0.483938378 | -0.350774 | 0.002478 | hypomethylated |
| cg11100658 | 0.82327 | 0.645577297 | -0.350776 | 9.95E-05 | hypomethylated |
| cg24663419 | 0.81947 | 0.642560541 | -0.350859 | 5.06E-05 | hypomethylated |
| cg04509221 | 0.74778 | 0.586345405 | -0.350863 | 0.000501 | hypomethylated |
| cg15078958 | 0.56356 | 0.441887568 | -0.35089  | 0.000262 | hypomethylated |
| cg01761236 | 0.72474 | 0.568241622 | -0.350959 | 8.03E-05 | hypomethylated |
| cg25344194 | 0.59026 | 0.462776216 | -0.351036 | 0.000182 | hypomethylated |
| cg23119026 | 0.55128 | 0.432207568 | -0.351061 | 3.40E-05 | hypomethylated |
| cg17243957 | 0.8053  | 0.631261081 | -0.35129  | 3.15E-05 | hypomethylated |
| cg25648211 | 0.97048 | 0.760709189 | -0.351353 | 1.93E-06 | hypomethylated |
| cg26846864 | 0.77561 | 0.607908649 | -0.351477 | 0.000224 | hypomethylated |
| cg09410380 | 0.89384 | 0.700514054 | -0.351603 | 1.48E-05 | hypomethylated |
| cg13013841 | 0.67819 | 0.531496216 | -0.35163  | 0.007035 | hypomethylated |
| cg12056210 | 0.64594 | 0.506210811 | -0.351662 | 0.000117 | hypomethylated |
| cg16567216 | 0.74884 | 0.586844324 | -0.35168  | 0.001031 | hypomethylated |
| cg05856951 | 0.87037 | 0.682013514 | -0.351829 | 3.15E-05 | hypomethylated |
| cg09633579 | 0.54182 | 0.424553514 | -0.351867 | 1.62E-05 | hypomethylated |
| cg01277983 | 0.78307 | 0.613572973 | -0.351906 | 4.26E-05 | hypomethylated |
| cg20064006 | 0.86572 | 0.678322162 | -0.35193  | 9.96E-06 | hypomethylated |
| cg08378742 | 0.85031 | 0.666196757 | -0.352041 | 4.70E-05 | hypomethylated |
| cg11294312 | 0.77924 | 0.610509189 | -0.352055 | 5.58E-06 | hypomethylated |
| cg20146967 | 0.83343 | 0.652954054 | -0.35208  | 1.28E-05 | hypomethylated |
| cg16291069 | 0.84404 | 0.661260541 | -0.352093 | 7.29E-05 | hypomethylated |
| cg14384685 | 0.84204 | 0.659688649 | -0.352103 | 1.77E-05 | hypomethylated |
| cg07924154 | 0.59709 | 0.467776216 | -0.35213  | 5.73E-06 | hypomethylated |
| cg04968426 | 0.82871 | 0.649205405 | -0.352192 | 1.99E-05 | hypomethylated |
| cg10055235 | 0.78988 | 0.618784865 | -0.352196 | 6.93E-06 | hypomethylated |
| cg13948456 | 0.65643 | 0.51424     | -0.352199 | 2.51E-05 | hypomethylated |
| cg22581200 | 0.89874 | 0.704048108 | -0.35223  | 8.37E-06 | hypomethylated |
| cg08042273 | 0.74771 | 0.585717838 | -0.352273 | 3.23E-05 | hypomethylated |
| cg16928869 | 0.79876 | 0.625705405 | -0.352279 | 2.15E-05 | hypomethylated |
| cg25652751 | 0.85043 | 0.66617027  | -0.352302 | 8.22E-05 | hypomethylated |
| cg03462053 | 0.88993 | 0.697097838 | -0.352331 | 8.37E-06 | hypomethylated |
| cg02242572 | 0.687   | 0.538117297 | -0.352389 | 0.00101  | hypomethylated |
| cg07041720 | 0.74283 | 0.58184     | -0.35241  | 0.000234 | hypomethylated |
| cg14343414 | 0.88821 | 0.69571027  | -0.352414 | 2.23E-06 | hypomethylated |
| cg04531473 | 0.52519 | 0.411358378 | -0.352444 | 0.000104 | hypomethylated |
| cg24932628 | 0.82173 | 0.643603243 | -0.352493 | 7.65E-05 | hypomethylated |

|            |         |             |           |          |                |
|------------|---------|-------------|-----------|----------|----------------|
| cg03619332 | 0.62669 | 0.490838378 | -0.352504 | 6.95E-05 | hypomethylated |
| cg05896714 | 0.84009 | 0.657958378 | -0.352548 | 0.000581 | hypomethylated |
| cg00249205 | 0.71582 | 0.56062973  | -0.352549 | 9.27E-05 | hypomethylated |
| cg10334976 | 0.8301  | 0.650128108 | -0.352561 | 0.000107 | hypomethylated |
| cg00665343 | 0.83378 | 0.652992432 | -0.3526   | 2.57E-05 | hypomethylated |
| cg10273135 | 0.75415 | 0.590621622 | -0.352617 | 0.000667 | hypomethylated |
| cg07556018 | 0.75011 | 0.587455135 | -0.352624 | 0.001118 | hypomethylated |
| cg19217463 | 0.71557 | 0.56035027  | -0.352764 | 0.000822 | hypomethylated |
| cg22678398 | 0.81139 | 0.635364865 | -0.35281  | 0.000129 | hypomethylated |
| cg25686905 | 0.82129 | 0.643093514 | -0.352863 | 1.58E-05 | hypomethylated |
| cg21331947 | 0.71562 | 0.560337838 | -0.352897 | 0.001212 | hypomethylated |
| cg21245092 | 0.76306 | 0.597479459 | -0.352907 | 0.000132 | hypomethylated |
| cg05599155 | 0.95349 | 0.74656973  | -0.352941 | 2.51E-05 | hypomethylated |
| cg19804071 | 0.89637 | 0.701839459 | -0.352953 | 3.00E-05 | hypomethylated |
| cg26259865 | 0.71969 | 0.56348     | -0.353011 | 3.76E-05 | hypomethylated |
| cg02526838 | 0.93712 | 0.733665946 | -0.35311  | 1.09E-06 | hypomethylated |
| cg11453400 | 0.70732 | 0.553751351 | -0.353125 | 0.000259 | hypomethylated |
| cg13223721 | 0.85566 | 0.66988     | -0.353135 | 2.87E-06 | hypomethylated |
| cg11214532 | 0.8783  | 0.687598919 | -0.353147 | 2.10E-05 | hypomethylated |
| cg21750887 | 0.78587 | 0.615237297 | -0.353148 | 4.82E-05 | hypomethylated |
| cg00679556 | 0.77604 | 0.607534595 | -0.353164 | 0.000155 | hypomethylated |
| cg13491490 | 0.81239 | 0.635950811 | -0.353257 | 0.00024  | hypomethylated |
| cg08495245 | 0.64957 | 0.508490811 | -0.353263 | 0.001857 | hypomethylated |
| cg15149205 | 0.85338 | 0.668034595 | -0.353265 | 6.01E-05 | hypomethylated |
| cg06113298 | 0.53771 | 0.420922162 | -0.353275 | 0.000262 | hypomethylated |
| cg01447854 | 0.82325 | 0.644395135 | -0.353385 | 1.90E-06 | hypomethylated |
| cg09247020 | 0.82857 | 0.648548649 | -0.353409 | 5.65E-05 | hypomethylated |
| cg12531542 | 0.90611 | 0.709240541 | -0.353411 | 1.80E-05 | hypomethylated |
| cg26515755 | 0.77904 | 0.609692973 | -0.353614 | 0.000107 | hypomethylated |
| cg20287434 | 0.68398 | 0.535285946 | -0.353644 | 1.06E-05 | hypomethylated |
| cg13827582 | 0.76529 | 0.598914595 | -0.353656 | 0.00029  | hypomethylated |
| cg00932063 | 0.57715 | 0.451655676 | -0.353723 | 0.000219 | hypomethylated |
| cg26482939 | 0.7232  | 0.565927027 | -0.353779 | 0.001875 | hypomethylated |
| cg16378003 | 0.80067 | 0.626474054 | -0.353953 | 2.24E-05 | hypomethylated |
| cg26236329 | 0.58958 | 0.461302162 | -0.353976 | 0.014259 | hypomethylated |
| cg01078048 | 0.55464 | 0.433961622 | -0.353984 | 0.000417 | hypomethylated |
| cg02005771 | 0.81334 | 0.636360541 | -0.354014 | 0.000454 | hypomethylated |
| cg05980111 | 0.75745 | 0.592620541 | -0.354042 | 0.000112 | hypomethylated |
| cg15729307 | 0.7937  | 0.620943243 | -0.354132 | 0.000445 | hypomethylated |
| cg15601361 | 0.78595 | 0.614860541 | -0.354178 | 0.000187 | hypomethylated |
| cg09113474 | 0.79175 | 0.619381622 | -0.354216 | 7.29E-05 | hypomethylated |
| cg23599026 | 0.43903 | 0.343433514 | -0.354289 | 0.000219 | hypomethylated |
| cg08536838 | 0.83338 | 0.651907568 | -0.354307 | 1.25E-05 | hypomethylated |
| cg10464130 | 0.62693 | 0.490412973 | -0.354307 | 0.000931 | hypomethylated |
| cg05629278 | 0.85083 | 0.665532432 | -0.354362 | 1.12E-05 | hypomethylated |
| cg22590522 | 0.737   | 0.576446486 | -0.354478 | 1.12E-06 | hypomethylated |
| cg01233518 | 0.96122 | 0.751772973 | -0.35457  | 1.50E-05 | hypomethylated |
| cg15601682 | 0.96676 | 0.756098919 | -0.354583 | 3.11E-05 | hypomethylated |
| cg07950397 | 0.45331 | 0.354527027 | -0.354602 | 4.58E-05 | hypomethylated |
| cg05601974 | 0.63869 | 0.499498378 | -0.354636 | 0.000607 | hypomethylated |
| cg24015522 | 0.85459 | 0.668333514 | -0.354664 | 8.22E-05 | hypomethylated |
| cg04615850 | 0.60386 | 0.47222973  | -0.354725 | 7.12E-05 | hypomethylated |
| cg04125273 | 0.65353 | 0.511058919 | -0.354764 | 0.000189 | hypomethylated |
| cg18019572 | 0.78954 | 0.617384865 | -0.354842 | 0.000274 | hypomethylated |
| cg01763884 | 0.75802 | 0.592711892 | -0.354905 | 3.15E-05 | hypomethylated |
| cg09264065 | 0.6002  | 0.469307027 | -0.354911 | 0.000588 | hypomethylated |
| cg13209113 | 0.78547 | 0.614166486 | -0.354926 | 4.15E-05 | hypomethylated |
| cg02100410 | 0.75226 | 0.588197838 | -0.35493  | 8.13E-05 | hypomethylated |

|            |         |             |           |          |                |
|------------|---------|-------------|-----------|----------|----------------|
| cg10856296 | 0.89937 | 0.703179459 | -0.355022 | 4.80E-06 | hypomethylated |
| cg07013680 | 0.7046  | 0.550880541 | -0.355065 | 2.81E-05 | hypomethylated |
| cg17894779 | 0.79561 | 0.622034595 | -0.355067 | 4.00E-05 | hypomethylated |
| cg22576950 | 0.67627 | 0.528667027 | -0.35524  | 0.000214 | hypomethylated |
| cg08610968 | 0.87304 | 0.682480541 | -0.35526  | 1.12E-05 | hypomethylated |
| cg08703808 | 0.77726 | 0.607590811 | -0.355297 | 7.65E-05 | hypomethylated |
| cg00563566 | 0.79867 | 0.62432     | -0.355314 | 4.36E-05 | hypomethylated |
| cg15345396 | 0.87785 | 0.686182162 | -0.355383 | 3.00E-05 | hypomethylated |
| cg01279378 | 0.72928 | 0.570042162 | -0.355404 | 1.35E-05 | hypomethylated |
| cg08314176 | 0.63331 | 0.494988649 | -0.355516 | 0.001667 | hypomethylated |
| cg04012857 | 0.75869 | 0.592972973 | -0.355544 | 0.000193 | hypomethylated |
| cg19163939 | 0.85606 | 0.669073514 | -0.355547 | 5.19E-05 | hypomethylated |
| cg11739297 | 0.90667 | 0.708625946 | -0.355553 | 1.01E-05 | hypomethylated |
| cg16710099 | 0.67146 | 0.524788649 | -0.355565 | 6.31E-05 | hypomethylated |
| cg21503392 | 0.70894 | 0.554077838 | -0.355575 | 3.40E-05 | hypomethylated |
| cg18596043 | 0.7387  | 0.577329189 | -0.355594 | 6.31E-05 | hypomethylated |
| cg02667656 | 0.78186 | 0.610980541 | -0.355784 | 5.65E-06 | hypomethylated |
| cg09113530 | 0.5916  | 0.462298919 | -0.355796 | 0.0002   | hypomethylated |
| cg01905142 | 0.63262 | 0.494352973 | -0.355798 | 2.96E-05 | hypomethylated |
| cg22036057 | 0.8258  | 0.645264865 | -0.355901 | 2.64E-05 | hypomethylated |
| cg01154336 | 0.76342 | 0.596485405 | -0.35599  | 7.65E-05 | hypomethylated |
| cg12759387 | 0.59193 | 0.462489189 | -0.356007 | 0.00035  | hypomethylated |
| cg15808008 | 0.73052 | 0.570769189 | -0.356016 | 2.38E-05 | hypomethylated |
| cg11161550 | 0.51792 | 0.404631892 | -0.356119 | 8.37E-06 | hypomethylated |
| cg00816609 | 0.74427 | 0.58146973  | -0.356122 | 0.000154 | hypomethylated |
| cg07563033 | 0.82711 | 0.646156216 | -0.356196 | 0.000107 | hypomethylated |
| cg16215705 | 0.7757  | 0.605979459 | -0.35623  | 0.000293 | hypomethylated |
| cg27137836 | 0.81389 | 0.635807568 | -0.356244 | 7.32E-06 | hypomethylated |
| cg01109135 | 0.41591 | 0.324905405 | -0.356252 | 0.000912 | hypomethylated |
| cg13534999 | 0.87036 | 0.679915135 | -0.356258 | 2.85E-05 | hypomethylated |
| cg07287508 | 0.65176 | 0.509137838 | -0.356285 | 0.000107 | hypomethylated |
| cg15404019 | 0.65334 | 0.51033027  | -0.356403 | 0.000408 | hypomethylated |
| cg07759833 | 0.81391 | 0.635731351 | -0.356452 | 1.84E-05 | hypomethylated |
| cg01537494 | 0.62191 | 0.485737838 | -0.356528 | 4.26E-05 | hypomethylated |
| cg11860777 | 0.77787 | 0.607518378 | -0.356601 | 0.000229 | hypomethylated |
| cg01512532 | 0.826   | 0.645105946 | -0.356606 | 0.000101 | hypomethylated |
| cg21236500 | 0.87099 | 0.680238378 | -0.356616 | 3.67E-05 | hypomethylated |
| cg08336938 | 0.88175 | 0.688621622 | -0.356658 | 3.95E-05 | hypomethylated |
| cg20828084 | 0.82308 | 0.642758919 | -0.356755 | 0.000256 | hypomethylated |
| cg00004089 | 0.81077 | 0.633138378 | -0.356772 | 7.29E-05 | hypomethylated |
| cg08097086 | 0.70311 | 0.549063243 | -0.356778 | 5.72E-05 | hypomethylated |
| cg03967448 | 0.7748  | 0.605044865 | -0.356782 | 0.000135 | hypomethylated |
| cg09863950 | 0.7674  | 0.599265405 | -0.356784 | 9.27E-05 | hypomethylated |
| cg09696115 | 0.72994 | 0.569985946 | -0.356852 | 5.19E-05 | hypomethylated |
| cg24929181 | 0.86788 | 0.67769027  | -0.35687  | 1.63E-06 | hypomethylated |
| cg04607131 | 0.65726 | 0.513224865 | -0.356873 | 0.000358 | hypomethylated |
| cg07694621 | 0.68593 | 0.535596216 | -0.356916 | 0.000756 | hypomethylated |
| cg26296653 | 0.71473 | 0.558071892 | -0.356947 | 2.32E-05 | hypomethylated |
| cg23979832 | 0.70095 | 0.547306486 | -0.356963 | 0.000912 | hypomethylated |
| cg26286365 | 0.70416 | 0.549792973 | -0.357015 | 0.000395 | hypomethylated |
| cg27261397 | 0.87708 | 0.684785946 | -0.357055 | 1.73E-05 | hypomethylated |
| cg21166985 | 0.90019 | 0.702817838 | -0.357079 | 6.95E-05 | hypomethylated |
| cg13982366 | 0.74659 | 0.582886486 | -0.357101 | 0.000313 | hypomethylated |
| cg13411229 | 0.67883 | 0.529965946 | -0.357151 | 0.000102 | hypomethylated |
| cg09926488 | 0.70173 | 0.54783027  | -0.357187 | 4.47E-05 | hypomethylated |
| cg03607648 | 0.88806 | 0.69328973  | -0.357199 | 1.94E-05 | hypomethylated |
| cg08722675 | 0.63611 | 0.496582162 | -0.357244 | 0.003843 | hypomethylated |
| cg02483101 | 0.55603 | 0.433986486 | -0.357513 | 0.000296 | hypomethylated |



|            |         |             |           |          |                |
|------------|---------|-------------|-----------|----------|----------------|
| cg17389427 | 0.66811 | 0.521460541 | -0.357528 | 0.000109 | hypomethylated |
| cg04309194 | 0.67567 | 0.527356757 | -0.35754  | 0.00012  | hypomethylated |
| cg15429888 | 0.82784 | 0.64608     | -0.357639 | 2.27E-05 | hypomethylated |
| cg07022048 | 0.48054 | 0.375030811 | -0.357647 | 0.000159 | hypomethylated |
| cg24998110 | 0.78925 | 0.615950811 | -0.357667 | 0.000154 | hypomethylated |
| cg25214310 | 0.66608 | 0.519772973 | -0.357814 | 0.000245 | hypomethylated |
| cg18163092 | 0.97272 | 0.75899027  | -0.357943 | 1.41E-06 | hypomethylated |
| cg01618151 | 0.66845 | 0.521567027 | -0.357967 | 0.002856 | hypomethylated |
| cg24597131 | 0.75254 | 0.587161622 | -0.358011 | 1.46E-05 | hypomethylated |
| cg00571809 | 0.86722 | 0.676637297 | -0.358015 | 6.78E-05 | hypomethylated |
| cg08670181 | 0.87296 | 0.681071351 | -0.35811  | 1.12E-05 | hypomethylated |
| cg11024522 | 0.63958 | 0.498975135 | -0.358157 | 5.86E-05 | hypomethylated |
| cg26338202 | 0.83716 | 0.653118378 | -0.358159 | 0.00014  | hypomethylated |
| cg02412803 | 0.70858 | 0.552771892 | -0.358246 | 1.46E-05 | hypomethylated |
| cg26234644 | 0.8868  | 0.691800541 | -0.358253 | 3.76E-05 | hypomethylated |
| cg17978103 | 0.85407 | 0.666261622 | -0.358266 | 3.11E-05 | hypomethylated |
| cg25928742 | 0.63663 | 0.496596757 | -0.35838  | 1.75E-05 | hypomethylated |
| cg04945153 | 0.6377  | 0.49742     | -0.358413 | 8.03E-05 | hypomethylated |
| cg00148223 | 0.63345 | 0.494097838 | -0.358434 | 0.000209 | hypomethylated |
| cg17046756 | 0.62837 | 0.490106486 | -0.358519 | 0.00017  | hypomethylated |
| cg21446172 | 0.62426 | 0.486900541 | -0.35852  | 0.000187 | hypomethylated |
| cg09995507 | 0.73528 | 0.573478919 | -0.358553 | 5.65E-05 | hypomethylated |
| cg22945666 | 0.81175 | 0.633118378 | -0.35856  | 2.96E-05 | hypomethylated |
| cg25597362 | 0.86567 | 0.675148649 | -0.358612 | 3.15E-05 | hypomethylated |
| cg04095776 | 0.57248 | 0.446485405 | -0.358612 | 2.15E-05 | hypomethylated |
| cg06255037 | 0.67035 | 0.522793514 | -0.358673 | 8.63E-05 | hypomethylated |
| cg04959298 | 0.68865 | 0.537056757 | -0.358696 | 5.45E-05 | hypomethylated |
| cg23258400 | 0.82115 | 0.640380541 | -0.358716 | 0.000234 | hypomethylated |
| cg08903389 | 0.84142 | 0.656165405 | -0.358767 | 0.000262 | hypomethylated |
| cg01121978 | 0.9495  | 0.740425405 | -0.358814 | 6.66E-06 | hypomethylated |
| cg07622079 | 0.82969 | 0.646992973 | -0.358822 | 8.15E-06 | hypomethylated |
| cg01330456 | 0.93503 | 0.729121622 | -0.358853 | 2.46E-06 | hypomethylated |
| cg17469934 | 0.58531 | 0.456380541 | -0.358964 | 0.000168 | hypomethylated |
| cg09600088 | 0.88218 | 0.687817297 | -0.359048 | 2.27E-05 | hypomethylated |
| cg19056664 | 0.6331  | 0.493610811 | -0.359059 | 3.67E-05 | hypomethylated |
| cg09964873 | 0.82353 | 0.642041622 | -0.359154 | 1.50E-05 | hypomethylated |
| cg11666857 | 0.82565 | 0.643683243 | -0.359179 | 4.12E-06 | hypomethylated |
| cg22211507 | 0.68278 | 0.5323      | -0.359181 | 0.000187 | hypomethylated |
| cg06111140 | 0.73277 | 0.57126     | -0.359213 | 0.000277 | hypomethylated |
| cg04368724 | 0.82836 | 0.645778378 | -0.359219 | 8.37E-06 | hypomethylated |
| cg18232841 | 0.6873  | 0.535802162 | -0.35924  | 0.000187 | hypomethylated |
| cg26531076 | 0.93912 | 0.732099459 | -0.35927  | 1.18E-06 | hypomethylated |
| cg10858677 | 0.68053 | 0.53051027  | -0.359278 | 0.000653 | hypomethylated |
| cg05897465 | 0.70689 | 0.551057838 | -0.359282 | 6.86E-05 | hypomethylated |
| cg06654510 | 0.80031 | 0.623875676 | -0.3593   | 0.0003   | hypomethylated |
| cg17009836 | 0.53265 | 0.415207027 | -0.359357 | 6.46E-05 | hypomethylated |
| cg02303801 | 0.59953 | 0.467334595 | -0.359376 | 0.000805 | hypomethylated |
| cg03234072 | 0.87572 | 0.682615676 | -0.359396 | 5.86E-05 | hypomethylated |
| cg05634879 | 0.81181 | 0.632727027 | -0.359559 | 0.000147 | hypomethylated |
| cg11862081 | 0.64472 | 0.502468649 | -0.359639 | 9.72E-05 | hypomethylated |
| cg10632966 | 0.80068 | 0.623985946 | -0.359712 | 9.49E-05 | hypomethylated |
| cg15016120 | 0.70601 | 0.550167568 | -0.359818 | 0.000756 | hypomethylated |
| cg09354294 | 0.52708 | 0.410723243 | -0.359855 | 7.38E-05 | hypomethylated |
| cg17386689 | 0.80364 | 0.626225946 | -0.359866 | 0.000224 | hypomethylated |
| cg14936266 | 0.75404 | 0.587569189 | -0.359882 | 2.21E-05 | hypomethylated |
| cg13853813 | 0.86227 | 0.671887027 | -0.359921 | 8.71E-06 | hypomethylated |
| cg18050903 | 0.68343 | 0.532525405 | -0.359943 | 5.86E-05 | hypomethylated |
| cg20805475 | 0.61399 | 0.478397838 | -0.360004 | 0.004134 | hypomethylated |

|            |         |             |           |          |                |
|------------|---------|-------------|-----------|----------|----------------|
| cg13151664 | 0.81373 | 0.634002162 | -0.360062 | 0.000209 | hypomethylated |
| cg14530930 | 0.77669 | 0.605137297 | -0.360076 | 1.71E-05 | hypomethylated |
| cg23272369 | 0.89718 | 0.69895027  | -0.360208 | 3.74E-06 | hypomethylated |
| cg09489757 | 0.67352 | 0.524627568 | -0.360427 | 0.000187 | hypomethylated |
| cg16096836 | 0.7977  | 0.621322162 | -0.360505 | 0.000912 | hypomethylated |
| cg02785332 | 0.83218 | 0.648164865 | -0.360535 | 7.12E-05 | hypomethylated |
| cg21211321 | 0.83866 | 0.653206486 | -0.360547 | 0.000195 | hypomethylated |
| cg20458044 | 0.76437 | 0.595318378 | -0.36061  | 0.000575 | hypomethylated |
| cg00805360 | 0.75214 | 0.585756216 | -0.360701 | 4.94E-05 | hypomethylated |
| cg08222913 | 0.78619 | 0.612245946 | -0.360767 | 2.48E-05 | hypomethylated |
| cg17590003 | 0.60616 | 0.472030811 | -0.360818 | 0.000789 | hypomethylated |
| cg22044398 | 0.62159 | 0.484035135 | -0.360852 | 7.20E-05 | hypomethylated |
| cg04933530 | 0.74793 | 0.582347568 | -0.361023 | 0.000251 | hypomethylated |
| cg07812849 | 0.81613 | 0.635434595 | -0.361055 | 9.72E-05 | hypomethylated |
| cg10318148 | 0.6536  | 0.508867027 | -0.361119 | 2.64E-06 | hypomethylated |
| cg24174020 | 0.78093 | 0.607983243 | -0.361162 | 0.000408 | hypomethylated |
| cg22877504 | 0.85745 | 0.66753027  | -0.361219 | 4.05E-05 | hypomethylated |
| cg23517743 | 0.80339 | 0.62542973  | -0.361253 | 0.000386 | hypomethylated |
| cg07426848 | 0.5597  | 0.435711351 | -0.361281 | 6.01E-05 | hypomethylated |
| cg03979024 | 0.6441  | 0.501412432 | -0.361287 | 0.000209 | hypomethylated |
| cg12178904 | 0.73935 | 0.575535676 | -0.361352 | 0.000426 | hypomethylated |
| cg26230851 | 0.86779 | 0.675495676 | -0.361399 | 1.06E-05 | hypomethylated |
| cg21773633 | 0.78412 | 0.610360541 | -0.361413 | 1.89E-05 | hypomethylated |
| cg26532812 | 0.97967 | 0.76256973  | -0.361427 | 4.18E-06 | hypomethylated |
| cg18434354 | 0.57453 | 0.447209189 | -0.361432 | 0.000445 | hypomethylated |
| cg17738010 | 0.76508 | 0.595531351 | -0.361433 | 0.000633 | hypomethylated |
| cg23112821 | 0.86191 | 0.670888649 | -0.361464 | 0.00013  | hypomethylated |
| cg22475071 | 0.80767 | 0.628659459 | -0.361487 | 0.000195 | hypomethylated |
| cg14070039 | 0.78068 | 0.607637838 | -0.36152  | 0.000408 | hypomethylated |
| cg03841376 | 0.72551 | 0.564688649 | -0.36154  | 3.07E-05 | hypomethylated |
| cg24462992 | 0.73084 | 0.568772432 | -0.361704 | 0.000115 | hypomethylated |
| cg13742513 | 0.72555 | 0.564624865 | -0.361782 | 0.000209 | hypomethylated |
| cg23728189 | 0.75986 | 0.591322162 | -0.361789 | 9.05E-05 | hypomethylated |
| cg16561256 | 0.75432 | 0.587004865 | -0.361804 | 9.16E-05 | hypomethylated |
| cg03553819 | 0.90007 | 0.700422162 | -0.361812 | 1.56E-05 | hypomethylated |
| cg02691393 | 0.8445  | 0.657122162 | -0.361936 | 8.84E-05 | hypomethylated |
| cg16989784 | 0.55971 | 0.435500541 | -0.362005 | 7.03E-05 | hypomethylated |
| cg26595893 | 0.95219 | 0.740822703 | -0.362121 | 5.43E-06 | hypomethylated |
| cg27222669 | 0.74189 | 0.577194595 | -0.362148 | 0.000117 | hypomethylated |
| cg17357548 | 0.76077 | 0.591825946 | -0.362287 | 0.000403 | hypomethylated |
| cg10754941 | 0.73479 | 0.571613514 | -0.362292 | 7.52E-06 | hypomethylated |
| cg22027725 | 0.70758 | 0.550442162 | -0.362302 | 0.000152 | hypomethylated |
| cg27319971 | 0.8631  | 0.671423784 | -0.362304 | 7.65E-05 | hypomethylated |
| cg18167160 | 0.88745 | 0.690354595 | -0.362328 | 6.05E-06 | hypomethylated |
| cg15377933 | 0.90524 | 0.70416973  | -0.362377 | 3.49E-06 | hypomethylated |
| cg13410000 | 0.64282 | 0.500017838 | -0.362435 | 8.13E-05 | hypomethylated |
| cg01789576 | 0.61843 | 0.480998919 | -0.362577 | 8.63E-05 | hypomethylated |
| cg18932078 | 0.79168 | 0.615716757 | -0.362651 | 1.04E-05 | hypomethylated |
| cg16087432 | 0.72944 | 0.567308108 | -0.362657 | 0.000123 | hypomethylated |
| cg24576298 | 0.66034 | 0.513561081 | -0.362673 | 0.000575 | hypomethylated |
| cg13683626 | 0.77123 | 0.59978973  | -0.362704 | 8.42E-05 | hypomethylated |
| cg17972352 | 0.84255 | 0.655230811 | -0.362759 | 1.18E-05 | hypomethylated |
| cg13440206 | 0.79867 | 0.621065405 | -0.362854 | 0.000191 | hypomethylated |
| cg18232313 | 0.88048 | 0.684658919 | -0.362905 | 0.000129 | hypomethylated |
| cg19031085 | 0.77907 | 0.605787027 | -0.362942 | 0.000313 | hypomethylated |
| cg01618928 | 0.91422 | 0.710856216 | -0.362984 | 3.90E-06 | hypomethylated |
| cg00124095 | 0.49885 | 0.38788     | -0.362996 | 0.000805 | hypomethylated |
| cg05383531 | 0.77896 | 0.605668649 | -0.363021 | 0.000365 | hypomethylated |

|            |         |             |           |          |                |
|------------|---------|-------------|-----------|----------|----------------|
| cg09658183 | 0.74347 | 0.578036757 | -0.363113 | 5.45E-05 | hypomethylated |
| cg01917209 | 0.81535 | 0.633884865 | -0.363199 | 0.000219 | hypomethylated |
| cg10962223 | 0.67205 | 0.522471351 | -0.363217 | 9.27E-05 | hypomethylated |
| cg26520396 | 0.80141 | 0.623038378 | -0.363219 | 5.86E-05 | hypomethylated |
| cg14599823 | 0.77313 | 0.601042703 | -0.363244 | 0.000365 | hypomethylated |
| cg26159860 | 0.72605 | 0.564436757 | -0.363257 | 9.60E-05 | hypomethylated |
| cg02239377 | 0.77429 | 0.601902703 | -0.363344 | 0.001452 | hypomethylated |
| cg20271985 | 0.7297  | 0.567236216 | -0.363354 | 7.03E-06 | hypomethylated |
| cg21068293 | 0.69484 | 0.540122703 | -0.363394 | 2.89E-05 | hypomethylated |
| cg15661536 | 0.76919 | 0.597891892 | -0.363455 | 0.000166 | hypomethylated |
| cg10930101 | 0.66574 | 0.51746973  | -0.363484 | 8.03E-05 | hypomethylated |
| cg04505023 | 0.77574 | 0.602935676 | -0.363569 | 2.92E-05 | hypomethylated |
| cg01938825 | 0.81033 | 0.629792432 | -0.363633 | 0.000204 | hypomethylated |
| cg20847292 | 0.56009 | 0.435282162 | -0.363708 | 5.06E-05 | hypomethylated |
| cg00864954 | 0.69716 | 0.541795676 | -0.363741 | 0.000178 | hypomethylated |
| cg04996020 | 0.87555 | 0.680428108 | -0.363747 | 9.07E-06 | hypomethylated |
| cg18868540 | 0.84348 | 0.655467568 | -0.363829 | 8.15E-06 | hypomethylated |
| cg26886066 | 0.75962 | 0.590294595 | -0.363843 | 0.000342 | hypomethylated |
| cg08165083 | 0.84576 | 0.657227027 | -0.363857 | 0.000109 | hypomethylated |
| cg17799563 | 0.66205 | 0.514459459 | -0.363883 | 0.000185 | hypomethylated |
| cg24633312 | 0.59112 | 0.459325946 | -0.363933 | 0.000234 | hypomethylated |
| cg13766329 | 0.8929  | 0.693802703 | -0.363973 | 2.32E-05 | hypomethylated |
| cg09530438 | 0.66727 | 0.51844     | -0.364094 | 0.000417 | hypomethylated |
| cg06043201 | 0.79039 | 0.614075135 | -0.36415  | 0.000245 | hypomethylated |
| cg18100564 | 0.84538 | 0.656761081 | -0.364231 | 2.51E-05 | hypomethylated |
| cg06760077 | 0.75096 | 0.583363243 | -0.364342 | 0.000741 | hypomethylated |
| cg15406343 | 0.80092 | 0.62216     | -0.364373 | 2.35E-05 | hypomethylated |
| cg09233429 | 0.60402 | 0.469195676 | -0.364407 | 0.001096 | hypomethylated |
| cg25607643 | 0.73282 | 0.569232973 | -0.36444  | 0.000293 | hypomethylated |
| cg01767270 | 0.93109 | 0.723243243 | -0.36444  | 6.11E-07 | hypomethylated |
| cg23359385 | 0.63941 | 0.496662703 | -0.364475 | 0.00032  | hypomethylated |
| cg16070740 | 0.69897 | 0.542852973 | -0.364669 | 9.05E-05 | hypomethylated |
| cg01584473 | 0.75454 | 0.586003784 | -0.364687 | 0.000134 | hypomethylated |
| cg24475598 | 0.68563 | 0.532476757 | -0.364712 | 0.000557 | hypomethylated |
| cg19577080 | 0.64332 | 0.499611892 | -0.364729 | 0.000214 | hypomethylated |
| cg07979348 | 0.70104 | 0.54440973  | -0.364804 | 4.58E-05 | hypomethylated |
| cg27617780 | 0.86714 | 0.673367568 | -0.364871 | 2.35E-05 | hypomethylated |
| cg19009132 | 0.72216 | 0.560775676 | -0.364895 | 0.00012  | hypomethylated |
| cg03065165 | 0.75287 | 0.584618378 | -0.364906 | 4.47E-05 | hypomethylated |
| cg21418854 | 0.6967  | 0.540997838 | -0.364915 | 4.53E-05 | hypomethylated |
| cg07014973 | 0.66684 | 0.517792973 | -0.364965 | 0.000104 | hypomethylated |
| cg17583844 | 0.83773 | 0.650474595 | -0.364993 | 0.000214 | hypomethylated |
| cg11580790 | 0.57507 | 0.446483243 | -0.365132 | 0.000667 | hypomethylated |
| cg10368641 | 0.66803 | 0.51864973  | -0.365152 | 0.000613 | hypomethylated |
| cg08006182 | 0.87977 | 0.683036216 | -0.365164 | 2.21E-05 | hypomethylated |
| cg22304285 | 0.86857 | 0.674321081 | -0.365206 | 1.20E-05 | hypomethylated |
| cg14656153 | 0.75308 | 0.584645946 | -0.36524  | 0.000237 | hypomethylated |
| cg01106572 | 0.74253 | 0.576445946 | -0.365264 | 0.000893 | hypomethylated |
| cg24145481 | 0.71093 | 0.551879459 | -0.365354 | 0.000142 | hypomethylated |
| cg25034766 | 0.93336 | 0.724532973 | -0.365382 | 5.65E-05 | hypomethylated |
| cg27370104 | 0.56982 | 0.442328108 | -0.365389 | 0.003538 | hypomethylated |
| cg27530053 | 0.86543 | 0.671787568 | -0.365412 | 4.15E-05 | hypomethylated |
| cg20467658 | 0.52623 | 0.408481081 | -0.365424 | 0.000335 | hypomethylated |
| cg27546012 | 0.74281 | 0.576590811 | -0.365445 | 0.00032  | hypomethylated |
| cg24964130 | 0.89364 | 0.693524865 | -0.365746 | 5.14E-06 | hypomethylated |
| cg25557280 | 0.84677 | 0.657140541 | -0.365768 | 3.00E-05 | hypomethylated |
| cg26538691 | 0.74551 | 0.578548649 | -0.365789 | 0.00012  | hypomethylated |
| cg12994591 | 0.7616  | 0.591020541 | -0.365825 | 3.07E-05 | hypomethylated |

|            |         |             |           |          |                |
|------------|---------|-------------|-----------|----------|----------------|
| cg06219310 | 0.70448 | 0.546667027 | -0.365896 | 0.000688 | hypomethylated |
| cg25101291 | 0.72051 | 0.55908973  | -0.365939 | 3.57E-05 | hypomethylated |
| cg13911594 | 0.77456 | 0.6009      | -0.366252 | 2.71E-05 | hypomethylated |
| cg08387551 | 0.7703  | 0.597569189 | -0.366315 | 6.46E-05 | hypomethylated |
| cg22237425 | 0.67175 | 0.521083243 | -0.366411 | 0.000607 | hypomethylated |
| cg12083644 | 0.90671 | 0.703329189 | -0.366441 | 1.04E-05 | hypomethylated |
| cg14237567 | 0.76177 | 0.590876757 | -0.366498 | 0.000119 | hypomethylated |
| cg24904739 | 0.891   | 0.691108649 | -0.366513 | 4.00E-05 | hypomethylated |
| cg14303017 | 0.8077  | 0.626494595 | -0.366517 | 8.26E-06 | hypomethylated |
| cg25314624 | 0.86592 | 0.671652432 | -0.366519 | 2.35E-05 | hypomethylated |
| cg25165975 | 0.61905 | 0.480153514 | -0.36656  | 2.71E-05 | hypomethylated |
| cg17240454 | 0.72332 | 0.561024324 | -0.366571 | 5.45E-05 | hypomethylated |
| cg06318676 | 0.80367 | 0.623337838 | -0.366589 | 1.25E-05 | hypomethylated |
| cg15803671 | 0.86808 | 0.673228649 | -0.366731 | 1.99E-05 | hypomethylated |
| cg20268054 | 0.75773 | 0.587647568 | -0.366733 | 9.07E-06 | hypomethylated |
| cg25000900 | 0.80235 | 0.622197838 | -0.366858 | 0.000187 | hypomethylated |
| cg02577745 | 0.7586  | 0.588189189 | -0.367059 | 5.86E-05 | hypomethylated |
| cg08807496 | 0.8187  | 0.634781622 | -0.367075 | 3.27E-05 | hypomethylated |
| cg10020787 | 0.53613 | 0.415683243 | -0.367098 | 4.05E-05 | hypomethylated |
| cg19760965 | 0.86371 | 0.669592973 | -0.367263 | 0.00014  | hypomethylated |
| cg05396243 | 0.8842  | 0.68546973  | -0.36728  | 1.17E-05 | hypomethylated |
| cg17243654 | 0.72319 | 0.560642703 | -0.367293 | 3.76E-05 | hypomethylated |
| cg15938671 | 0.913   | 0.707779459 | -0.367315 | 1.75E-06 | hypomethylated |
| cg02992118 | 0.69448 | 0.538370811 | -0.367333 | 1.73E-05 | hypomethylated |
| cg19774788 | 0.70823 | 0.54896973  | -0.367491 | 0.000256 | hypomethylated |
| cg23678906 | 0.82851 | 0.642195135 | -0.367507 | 5.58E-06 | hypomethylated |
| cg24387800 | 0.69908 | 0.541865405 | -0.367523 | 3.32E-05 | hypomethylated |
| cg15519474 | 0.71235 | 0.552141081 | -0.367549 | 0.000327 | hypomethylated |
| cg12897502 | 0.77405 | 0.599944324 | -0.367598 | 0.000145 | hypomethylated |
| cg03340667 | 0.82277 | 0.637682162 | -0.367652 | 8.15E-06 | hypomethylated |
| cg15441656 | 0.77991 | 0.604449189 | -0.367687 | 0.000191 | hypomethylated |
| cg18930012 | 0.58298 | 0.451822703 | -0.36769  | 7.29E-05 | hypomethylated |
| cg01423643 | 0.93886 | 0.727587027 | -0.36779  | 1.99E-06 | hypomethylated |
| cg09244312 | 0.74984 | 0.581101081 | -0.367794 | 0.000725 | hypomethylated |
| cg10194536 | 0.77307 | 0.5991      | -0.367802 | 0.000613 | hypomethylated |
| cg10187927 | 0.64008 | 0.49601027  | -0.367882 | 5.86E-05 | hypomethylated |
| cg00182273 | 0.58976 | 0.457012973 | -0.367893 | 4.15E-05 | hypomethylated |
| cg03363633 | 0.62486 | 0.484204865 | -0.367915 | 0.001667 | hypomethylated |
| cg17585031 | 0.56642 | 0.438868649 | -0.368083 | 0.000224 | hypomethylated |
| cg14353508 | 0.60908 | 0.471918378 | -0.368094 | 0.002502 | hypomethylated |
| cg14947787 | 0.86977 | 0.673859459 | -0.368186 | 9.27E-05 | hypomethylated |
| cg11375547 | 0.63537 | 0.492254595 | -0.368192 | 8.52E-05 | hypomethylated |
| cg01619416 | 0.72544 | 0.561996216 | -0.368296 | 0.000117 | hypomethylated |
| cg02153286 | 0.89743 | 0.695231892 | -0.368305 | 1.52E-05 | hypomethylated |
| cg14918744 | 0.7206  | 0.558240541 | -0.368312 | 3.23E-05 | hypomethylated |
| cg26167249 | 0.71377 | 0.552938919 | -0.368339 | 0.000112 | hypomethylated |
| cg19915762 | 0.52698 | 0.408221081 | -0.368398 | 2.21E-05 | hypomethylated |
| cg09039163 | 0.67933 | 0.526222703 | -0.368439 | 0.000646 | hypomethylated |
| cg08104310 | 0.6628  | 0.513416216 | -0.368445 | 0.000234 | hypomethylated |
| cg16543027 | 0.55075 | 0.426605946 | -0.368494 | 0.014032 | hypomethylated |
| cg07128624 | 0.7165  | 0.554994054 | -0.368494 | 0.000159 | hypomethylated |
| cg10458734 | 0.87713 | 0.679377297 | -0.368578 | 6.46E-05 | hypomethylated |
| cg12589308 | 0.92861 | 0.719205946 | -0.368668 | 6.54E-05 | hypomethylated |
| cg04865929 | 0.7843  | 0.60742     | -0.368711 | 7.84E-05 | hypomethylated |
| cg25545917 | 0.71736 | 0.555548649 | -0.368784 | 5.86E-05 | hypomethylated |
| cg09610644 | 0.80473 | 0.623210811 | -0.368785 | 5.32E-05 | hypomethylated |
| cg00095629 | 0.68403 | 0.529730811 | -0.3688   | 0.000207 | hypomethylated |
| cg14359680 | 0.63555 | 0.492185405 | -0.368804 | 0.00305  | hypomethylated |

|            |         |             |           |          |                |
|------------|---------|-------------|-----------|----------|----------------|
| cg05808709 | 0.72089 | 0.558274595 | -0.368804 | 0.000137 | hypomethylated |
| cg11958234 | 0.82008 | 0.635078919 | -0.368829 | 8.94E-05 | hypomethylated |
| cg27174420 | 0.87825 | 0.680120541 | -0.368841 | 5.86E-05 | hypomethylated |
| cg11150222 | 0.81083 | 0.627907027 | -0.368849 | 0.000102 | hypomethylated |
| cg26060817 | 0.8291  | 0.642048649 | -0.368864 | 2.48E-05 | hypomethylated |
| cg05460486 | 0.90602 | 0.701586486 | -0.368922 | 6.57E-06 | hypomethylated |
| cg17500202 | 0.81449 | 0.630645946 | -0.369067 | 6.93E-06 | hypomethylated |
| cg11736739 | 0.78925 | 0.611100541 | -0.369073 | 0.000193 | hypomethylated |
| cg15700850 | 0.72776 | 0.563481622 | -0.369094 | 7.32E-06 | hypomethylated |
| cg26948823 | 0.58022 | 0.449215676 | -0.369192 | 0.000327 | hypomethylated |
| cg20490031 | 0.85584 | 0.66258973  | -0.369225 | 8.63E-05 | hypomethylated |
| cg05684195 | 0.58315 | 0.451471892 | -0.369231 | 1.71E-05 | hypomethylated |
| cg06720084 | 0.86197 | 0.667324865 | -0.369248 | 2.85E-05 | hypomethylated |
| cg01756899 | 0.85307 | 0.66042973  | -0.369259 | 4.47E-05 | hypomethylated |
| cg09869811 | 0.81909 | 0.634122162 | -0.369261 | 0.000268 | hypomethylated |
| cg01362515 | 0.81776 | 0.633091892 | -0.369263 | 7.93E-06 | hypomethylated |
| cg20061378 | 0.95381 | 0.738385946 | -0.369327 | 6.57E-06 | hypomethylated |
| cg00316341 | 0.77669 | 0.601254054 | -0.369364 | 0.000219 | hypomethylated |
| cg15806880 | 0.73162 | 0.566265405 | -0.369616 | 0.000293 | hypomethylated |
| cg03499943 | 0.75074 | 0.581056757 | -0.369634 | 0.000115 | hypomethylated |
| cg07222243 | 0.57755 | 0.44700973  | -0.36964  | 3.04E-05 | hypomethylated |
| cg01125010 | 0.74736 | 0.578432432 | -0.369655 | 0.000135 | hypomethylated |
| cg02202664 | 0.83908 | 0.649407027 | -0.369685 | 9.72E-05 | hypomethylated |
| cg06639267 | 0.65319 | 0.505532432 | -0.369699 | 8.13E-05 | hypomethylated |
| cg24212268 | 0.6981  | 0.540283243 | -0.369718 | 0.003843 | hypomethylated |
| cg01182620 | 0.73133 | 0.565996757 | -0.369729 | 0.000135 | hypomethylated |
| cg03449125 | 0.74736 | 0.578361081 | -0.369833 | 0.00012  | hypomethylated |
| cg21810793 | 0.76906 | 0.59514973  | -0.369843 | 0.000126 | hypomethylated |
| cg16643542 | 0.75507 | 0.584294595 | -0.369914 | 0.000138 | hypomethylated |
| cg05735432 | 0.75821 | 0.586688649 | -0.370002 | 6.15E-05 | hypomethylated |
| cg24146288 | 0.80492 | 0.622778378 | -0.370127 | 0.000459 | hypomethylated |
| cg01430385 | 0.68814 | 0.532392432 | -0.370212 | 5.12E-05 | hypomethylated |
| cg08892386 | 0.79433 | 0.614523243 | -0.370271 | 7.47E-05 | hypomethylated |
| cg07875121 | 0.61095 | 0.472641622 | -0.370308 | 0.00039  | hypomethylated |
| cg05033749 | 0.81215 | 0.62822973  | -0.370454 | 1.25E-05 | hypomethylated |
| cg24461524 | 0.63178 | 0.488694054 | -0.370491 | 4.64E-05 | hypomethylated |
| cg07078452 | 0.81319 | 0.629012973 | -0.370503 | 1.31E-05 | hypomethylated |
| cg19104757 | 0.92503 | 0.715463243 | -0.370623 | 9.57E-06 | hypomethylated |
| cg01471036 | 0.76488 | 0.591572973 | -0.370677 | 6.62E-05 | hypomethylated |
| cg06355652 | 0.75478 | 0.583752973 | -0.370698 | 0.000107 | hypomethylated |
| cg09530156 | 0.77575 | 0.599965946 | -0.370711 | 0.000142 | hypomethylated |
| cg00479718 | 0.84985 | 0.657252432 | -0.370761 | 3.15E-05 | hypomethylated |
| cg20239912 | 0.63103 | 0.487965946 | -0.370928 | 3.30E-06 | hypomethylated |
| cg04757411 | 0.84535 | 0.65364973  | -0.371031 | 7.65E-05 | hypomethylated |
| cg12221970 | 0.92413 | 0.714546486 | -0.371068 | 9.69E-06 | hypomethylated |
| cg24382178 | 0.70868 | 0.547948649 | -0.371094 | 1.40E-05 | hypomethylated |
| cg00688979 | 0.76402 | 0.590728108 | -0.371116 | 9.38E-05 | hypomethylated |
| cg22092397 | 0.79062 | 0.61128973  | -0.371128 | 9.95E-05 | hypomethylated |
| cg06627043 | 0.67213 | 0.519672973 | -0.371136 | 0.000232 | hypomethylated |
| cg07005770 | 0.65391 | 0.505568108 | -0.371187 | 2.21E-05 | hypomethylated |
| cg07086380 | 0.79653 | 0.615822162 | -0.371215 | 0.000875 | hypomethylated |
| cg20373634 | 0.90209 | 0.697424324 | -0.371235 | 5.81E-06 | hypomethylated |
| cg26965877 | 0.89586 | 0.692604324 | -0.371242 | 1.62E-05 | hypomethylated |
| cg15257783 | 0.56654 | 0.437984324 | -0.371299 | 0.000245 | hypomethylated |
| cg06230303 | 0.79395 | 0.613771351 | -0.371347 | 6.13E-06 | hypomethylated |
| cg14630748 | 0.83548 | 0.645851351 | -0.371403 | 1.80E-05 | hypomethylated |
| cg19272754 | 0.74895 | 0.578942162 | -0.37145  | 6.22E-06 | hypomethylated |
| cg06748146 | 0.72874 | 0.563287568 | -0.371533 | 0.000417 | hypomethylated |

|            |         |             |           |          |                |
|------------|---------|-------------|-----------|----------|----------------|
| cg19088634 | 0.58908 | 0.455333514 | -0.37154  | 1.54E-05 | hypomethylated |
| cg25790453 | 0.67074 | 0.518411892 | -0.371655 | 0.001237 | hypomethylated |
| cg14076161 | 0.60092 | 0.464417838 | -0.37175  | 1.12E-05 | hypomethylated |
| cg01287833 | 0.8712  | 0.673284324 | -0.371788 | 9.72E-05 | hypomethylated |
| cg03165356 | 0.72741 | 0.562082703 | -0.371986 | 0.001188 | hypomethylated |
| cg10628909 | 0.83396 | 0.644394595 | -0.372034 | 2.15E-05 | hypomethylated |
| cg06899522 | 0.8517  | 0.658053514 | -0.37214  | 0.00014  | hypomethylated |
| cg18040826 | 0.82118 | 0.63444973  | -0.372193 | 4.26E-05 | hypomethylated |
| cg27139805 | 0.76592 | 0.591748108 | -0.372211 | 1.54E-05 | hypomethylated |
| cg12039583 | 0.84585 | 0.6535      | -0.372215 | 0.0002   | hypomethylated |
| cg25836232 | 0.66309 | 0.512282162 | -0.372266 | 0.000445 | hypomethylated |
| cg03490200 | 0.87432 | 0.675460541 | -0.37229  | 2.57E-05 | hypomethylated |
| cg05490864 | 0.67276 | 0.519705405 | -0.372398 | 4.47E-05 | hypomethylated |
| cg06151718 | 0.85656 | 0.661685405 | -0.372409 | 2.21E-05 | hypomethylated |
| cg23396177 | 0.73032 | 0.564162162 | -0.372419 | 7.29E-05 | hypomethylated |
| cg18046311 | 0.83659 | 0.646245405 | -0.372439 | 4.80E-06 | hypomethylated |
| cg00628477 | 0.60547 | 0.467684865 | -0.372519 | 8.15E-06 | hypomethylated |
| cg20592317 | 0.74218 | 0.573234054 | -0.372645 | 3.49E-06 | hypomethylated |
| cg18009653 | 0.82004 | 0.633348649 | -0.372694 | 1.66E-05 | hypomethylated |
| cg26623753 | 0.56139 | 0.433581622 | -0.3727   | 0.002231 | hypomethylated |
| cg09503566 | 0.83197 | 0.642555676 | -0.37271  | 4.67E-06 | hypomethylated |
| cg09155025 | 0.76176 | 0.588235135 | -0.372944 | 0.000163 | hypomethylated |
| cg23873406 | 0.67313 | 0.519768108 | -0.373017 | 3.15E-05 | hypomethylated |
| cg08617645 | 0.61432 | 0.474340541 | -0.373067 | 8.22E-05 | hypomethylated |
| cg02357046 | 0.77588 | 0.599078919 | -0.373087 | 7.93E-06 | hypomethylated |
| cg00168694 | 0.78874 | 0.608995676 | -0.373118 | 0.001164 | hypomethylated |
| cg16001335 | 0.63836 | 0.492883784 | -0.373123 | 0.000327 | hypomethylated |
| cg18836689 | 0.71427 | 0.551490811 | -0.373133 | 0.000219 | hypomethylated |
| cg08387270 | 0.80443 | 0.621036216 | -0.373289 | 2.64E-06 | hypomethylated |
| cg11624993 | 0.75806 | 0.58523027  | -0.373308 | 3.57E-05 | hypomethylated |
| cg08140055 | 0.68379 | 0.527890811 | -0.373314 | 6.62E-05 | hypomethylated |
| cg09558069 | 0.73099 | 0.564308649 | -0.373367 | 0.000229 | hypomethylated |
| cg24083746 | 0.49331 | 0.380822703 | -0.373375 | 0.000435 | hypomethylated |
| cg10183885 | 0.83184 | 0.642157297 | -0.373379 | 9.95E-05 | hypomethylated |
| cg15829116 | 0.57902 | 0.446962162 | -0.37346  | 3.67E-05 | hypomethylated |
| cg16705300 | 0.89506 | 0.690913514 | -0.373479 | 3.23E-05 | hypomethylated |
| cg03882071 | 0.64589 | 0.498568649 | -0.373496 | 0.000296 | hypomethylated |
| cg14355939 | 0.81525 | 0.629297297 | -0.373501 | 7.93E-06 | hypomethylated |
| cg19772651 | 0.96044 | 0.741358919 | -0.373523 | 3.69E-06 | hypomethylated |
| cg24323726 | 0.7346  | 0.567022703 | -0.373552 | 0.00101  | hypomethylated |
| cg13166171 | 0.62318 | 0.481009189 | -0.373584 | 7.84E-05 | hypomethylated |
| cg12237269 | 0.70693 | 0.545648649 | -0.373595 | 2.27E-05 | hypomethylated |
| cg24544047 | 0.6892  | 0.531955135 | -0.373618 | 0.001968 | hypomethylated |
| cg02232529 | 0.82067 | 0.63342     | -0.37364  | 1.14E-05 | hypomethylated |
| cg06538426 | 0.74522 | 0.575166486 | -0.373687 | 7.93E-05 | hypomethylated |
| cg08464513 | 0.79639 | 0.614558919 | -0.373924 | 0.00024  | hypomethylated |
| cg10517281 | 0.6103  | 0.470952973 | -0.373936 | 3.15E-05 | hypomethylated |
| cg11093872 | 0.82209 | 0.634351351 | -0.374014 | 8.83E-06 | hypomethylated |
| cg01283141 | 0.78359 | 0.604634595 | -0.374035 | 1.18E-05 | hypomethylated |
| cg05751310 | 0.76277 | 0.58854973  | -0.374084 | 1.99E-06 | hypomethylated |
| cg03833948 | 0.82409 | 0.635847027 | -0.374122 | 3.32E-05 | hypomethylated |
| cg15882394 | 0.81689 | 0.630278919 | -0.374151 | 0.000234 | hypomethylated |
| cg07200421 | 0.86972 | 0.671001081 | -0.374236 | 4.15E-05 | hypomethylated |
| cg05044414 | 0.70997 | 0.547747568 | -0.374247 | 0.000327 | hypomethylated |
| cg26656884 | 0.78365 | 0.604547568 | -0.374354 | 8.83E-06 | hypomethylated |
| cg14893129 | 0.84597 | 0.652615676 | -0.374373 | 1.18E-05 | hypomethylated |
| cg09811127 | 0.68223 | 0.526288649 | -0.374404 | 0.000335 | hypomethylated |
| cg23441018 | 0.74488 | 0.574575676 | -0.374511 | 0.00064  | hypomethylated |

|            |         |             |           |          |                |
|------------|---------|-------------|-----------|----------|----------------|
| cg23033158 | 0.85486 | 0.659341622 | -0.374662 | 1.12E-05 | hypomethylated |
| cg17029694 | 0.53825 | 0.415137838 | -0.374686 | 2.85E-05 | hypomethylated |
| cg15692837 | 0.5519  | 0.425661081 | -0.374702 | 0.000354 | hypomethylated |
| cg16444062 | 0.91042 | 0.702111351 | -0.374832 | 9.95E-05 | hypomethylated |
| cg25752514 | 0.74977 | 0.578205946 | -0.374865 | 1.25E-05 | hypomethylated |
| cg11505841 | 0.91045 | 0.70210973  | -0.374883 | 8.95E-06 | hypomethylated |
| cg18991321 | 0.62563 | 0.482458919 | -0.374904 | 0.000191 | hypomethylated |
| cg08011941 | 0.83306 | 0.642419459 | -0.374905 | 1.04E-05 | hypomethylated |
| cg13381679 | 0.8424  | 0.649571351 | -0.375017 | 1.06E-05 | hypomethylated |
| cg03497895 | 0.87729 | 0.676345946 | -0.375292 | 2.45E-05 | hypomethylated |
| cg06589239 | 0.78579 | 0.605751892 | -0.375417 | 0.002455 | hypomethylated |
| cg05771157 | 0.88945 | 0.685653514 | -0.375434 | 1.67E-06 | hypomethylated |
| cg04705318 | 0.80869 | 0.623395135 | -0.37544  | 2.92E-05 | hypomethylated |
| cg05659486 | 0.68781 | 0.530211351 | -0.375443 | 0.000116 | hypomethylated |
| cg14280181 | 0.78225 | 0.603011892 | -0.375443 | 0.000399 | hypomethylated |
| cg20377232 | 0.65937 | 0.508282703 | -0.375457 | 0.000474 | hypomethylated |
| cg00566164 | 0.92953 | 0.716534054 | -0.375466 | 2.71E-06 | hypomethylated |
| cg20698113 | 0.69406 | 0.535006486 | -0.375504 | 0.000145 | hypomethylated |
| cg16555466 | 0.81102 | 0.625146486 | -0.375543 | 8.13E-05 | hypomethylated |
| cg11245181 | 0.80013 | 0.616747568 | -0.375554 | 0.000152 | hypomethylated |
| cg26852857 | 0.88206 | 0.679896216 | -0.375562 | 0.000123 | hypomethylated |
| cg14446406 | 0.77794 | 0.599637297 | -0.375569 | 1.94E-05 | hypomethylated |
| cg13471735 | 0.81203 | 0.625907027 | -0.375585 | 0.00017  | hypomethylated |
| cg00392257 | 0.55985 | 0.431494054 | -0.3757   | 4.00E-05 | hypomethylated |
| cg13423274 | 0.85334 | 0.657693514 | -0.375705 | 7.52E-06 | hypomethylated |
| cg14176942 | 0.874   | 0.673605405 | -0.37573  | 1.94E-05 | hypomethylated |
| cg03226872 | 0.76986 | 0.593324865 | -0.375774 | 2.78E-05 | hypomethylated |
| cg08676510 | 0.64505 | 0.497124865 | -0.375803 | 0.000588 | hypomethylated |
| cg26808637 | 0.86228 | 0.664530811 | -0.37582  | 2.30E-05 | hypomethylated |
| cg18178189 | 0.81239 | 0.626072432 | -0.375843 | 2.85E-05 | hypomethylated |
| cg04007890 | 0.78229 | 0.602849189 | -0.375906 | 1.12E-05 | hypomethylated |
| cg11601375 | 0.77226 | 0.595119459 | -0.375907 | 0.000166 | hypomethylated |
| cg01390445 | 0.9137  | 0.704103243 | -0.375934 | 2.89E-05 | hypomethylated |
| cg09439722 | 0.66577 | 0.513007568 | -0.376044 | 5.38E-05 | hypomethylated |
| cg26159990 | 0.7218  | 0.556167027 | -0.376081 | 0.000159 | hypomethylated |
| cg11735008 | 0.84214 | 0.648891351 | -0.376083 | 1.58E-05 | hypomethylated |
| cg07475178 | 0.92836 | 0.715312973 | -0.37611  | 0.000511 | hypomethylated |
| cg21908886 | 0.7464  | 0.575105405 | -0.376123 | 0.000182 | hypomethylated |
| cg00243854 | 0.71409 | 0.5502      | -0.37615  | 0.000313 | hypomethylated |
| cg13963044 | 0.68157 | 0.525128649 | -0.376191 | 0.00024  | hypomethylated |
| cg01991934 | 0.5526  | 0.425758919 | -0.376199 | 4.31E-05 | hypomethylated |
| cg22591889 | 0.8035  | 0.619035676 | -0.376275 | 3.85E-05 | hypomethylated |
| cg06149671 | 0.88172 | 0.679290811 | -0.376291 | 8.71E-06 | hypomethylated |
| cg07959609 | 0.72532 | 0.558768108 | -0.376368 | 0.000102 | hypomethylated |
| cg24180759 | 0.78409 | 0.604041622 | -0.376371 | 0.00028  | hypomethylated |
| cg23805594 | 0.8587  | 0.661512432 | -0.376386 | 1.75E-05 | hypomethylated |
| cg00351750 | 0.80419 | 0.619430811 | -0.376593 | 0.000234 | hypomethylated |
| cg22646210 | 0.62623 | 0.482351892 | -0.376607 | 0.000168 | hypomethylated |
| cg05345310 | 0.83817 | 0.645590811 | -0.376623 | 0.000129 | hypomethylated |
| cg06144311 | 0.5984  | 0.460906486 | -0.376636 | 7.12E-05 | hypomethylated |
| cg18200075 | 0.66182 | 0.509736216 | -0.376688 | 0.000358 | hypomethylated |
| cg17836612 | 0.52396 | 0.403528108 | -0.376788 | 0.000145 | hypomethylated |
| cg00328720 | 0.85437 | 0.657966486 | -0.376847 | 0.000212 | hypomethylated |
| cg02104392 | 0.75102 | 0.578368649 | -0.376862 | 0.000104 | hypomethylated |
| cg09148608 | 0.77664 | 0.598076757 | -0.376915 | 5.86E-05 | hypomethylated |
| cg24768463 | 0.56738 | 0.43692     | -0.376946 | 0.000126 | hypomethylated |
| cg04208928 | 0.80478 | 0.619731351 | -0.376951 | 0.000145 | hypomethylated |
| cg16722931 | 0.73797 | 0.568238919 | -0.377065 | 9.49E-05 | hypomethylated |

|            |         |             |           |          |                |
|------------|---------|-------------|-----------|----------|----------------|
| cg25221919 | 0.71874 | 0.553427027 | -0.377077 | 4.26E-05 | hypomethylated |
| cg25954705 | 0.75398 | 0.580547568 | -0.377112 | 7.72E-06 | hypomethylated |
| cg21582831 | 0.61901 | 0.476606486 | -0.377164 | 0.002189 | hypomethylated |
| cg17476101 | 0.86387 | 0.665031892 | -0.377391 | 9.44E-06 | hypomethylated |
| cg03224650 | 0.85958 | 0.661711892 | -0.377429 | 1.18E-05 | hypomethylated |
| cg10759972 | 0.74084 | 0.570294054 | -0.377456 | 0.001031 | hypomethylated |
| cg19867250 | 0.65293 | 0.502615676 | -0.377473 | 0.000124 | hypomethylated |
| cg18030943 | 0.70852 | 0.545406486 | -0.377477 | 0.015685 | hypomethylated |
| cg13753946 | 0.85532 | 0.658378919 | -0.377546 | 4.82E-05 | hypomethylated |
| cg00240178 | 0.73959 | 0.569295135 | -0.377549 | 0.000613 | hypomethylated |
| cg19600528 | 0.82512 | 0.635118378 | -0.377578 | 1.39E-05 | hypomethylated |
| cg13500113 | 0.75441 | 0.58069027  | -0.37758  | 2.27E-05 | hypomethylated |
| cg14815183 | 0.77989 | 0.600285405 | -0.377622 | 1.39E-05 | hypomethylated |
| cg22633936 | 0.73844 | 0.568380541 | -0.377624 | 0.000219 | hypomethylated |
| cg18195165 | 0.82372 | 0.634008108 | -0.377653 | 9.82E-06 | hypomethylated |
| cg22797169 | 0.72777 | 0.560155676 | -0.377655 | 0.000469 | hypomethylated |
| cg10063663 | 0.89496 | 0.688839459 | -0.377655 | 7.12E-05 | hypomethylated |
| cg11348165 | 0.70681 | 0.544011351 | -0.377686 | 7.74E-05 | hypomethylated |
| cg16628205 | 0.83724 | 0.644396757 | -0.377692 | 1.21E-05 | hypomethylated |
| cg01675238 | 0.60197 | 0.463302162 | -0.377738 | 0.01109  | hypomethylated |
| cg13689699 | 0.68043 | 0.523676216 | -0.377772 | 0.00064  | hypomethylated |
| cg14694075 | 0.58661 | 0.451460541 | -0.377802 | 0.000202 | hypomethylated |
| cg07317843 | 0.79966 | 0.615416216 | -0.377824 | 0.00029  | hypomethylated |
| cg13053992 | 0.69452 | 0.534491351 | -0.37785  | 0.000168 | hypomethylated |
| cg00818899 | 0.83262 | 0.640753514 | -0.377889 | 5.06E-05 | hypomethylated |
| cg24781699 | 0.7238  | 0.556990811 | -0.377938 | 0.003078 | hypomethylated |
| cg19819654 | 0.95656 | 0.736107568 | -0.377939 | 7.93E-06 | hypomethylated |
| cg12095505 | 0.58849 | 0.452858378 | -0.377958 | 4.15E-05 | hypomethylated |
| cg20066782 | 0.88592 | 0.681714595 | -0.378009 | 1.66E-05 | hypomethylated |
| cg13790576 | 0.60141 | 0.462775135 | -0.378038 | 0.000287 | hypomethylated |
| cg07661904 | 0.9154  | 0.704375135 | -0.378058 | 0.000135 | hypomethylated |
| cg07192961 | 0.85874 | 0.660775135 | -0.378062 | 9.72E-05 | hypomethylated |
| cg05996573 | 0.78757 | 0.606006486 | -0.378075 | 1.92E-05 | hypomethylated |
| cg23697467 | 0.76787 | 0.590844865 | -0.378083 | 4.36E-05 | hypomethylated |
| cg25287149 | 0.89011 | 0.684894595 | -0.378102 | 9.57E-06 | hypomethylated |
| cg15206445 | 0.60725 | 0.467246486 | -0.378107 | 0.00094  | hypomethylated |
| cg11152825 | 0.86205 | 0.663285946 | -0.378141 | 1.28E-05 | hypomethylated |
| cg14424963 | 0.64643 | 0.497331351 | -0.378287 | 0.003986 | hypomethylated |
| cg16900102 | 0.65126 | 0.501041081 | -0.378305 | 0.000274 | hypomethylated |
| cg22357390 | 0.78833 | 0.606467027 | -0.37837  | 3.07E-05 | hypomethylated |
| cg21083556 | 0.81642 | 0.628071351 | -0.378383 | 1.40E-05 | hypomethylated |
| cg06218344 | 0.6223  | 0.478731892 | -0.378392 | 0.000528 | hypomethylated |
| cg00034755 | 0.78679 | 0.605171892 | -0.378634 | 0.000143 | hypomethylated |
| cg18129996 | 0.84179 | 0.647466486 | -0.378655 | 0.000142 | hypomethylated |
| cg17017284 | 0.62432 | 0.480192432 | -0.378673 | 8.22E-05 | hypomethylated |
| cg16703312 | 0.69543 | 0.534878378 | -0.378694 | 7.65E-05 | hypomethylated |
| cg01808969 | 0.82992 | 0.638314054 | -0.378706 | 8.03E-05 | hypomethylated |
| cg22916017 | 0.90112 | 0.69307027  | -0.378718 | 0.000569 | hypomethylated |
| cg13820776 | 0.74978 | 0.576658378 | -0.37875  | 1.18E-06 | hypomethylated |
| cg25517015 | 0.88044 | 0.677134054 | -0.378783 | 5.72E-05 | hypomethylated |
| cg20230416 | 0.80242 | 0.617125405 | -0.378794 | 3.54E-06 | hypomethylated |
| cg26720010 | 0.87305 | 0.671441622 | -0.378802 | 3.39E-06 | hypomethylated |
| cg13100137 | 0.69939 | 0.537883784 | -0.378803 | 4.76E-05 | hypomethylated |
| cg10234693 | 0.51199 | 0.393747027 | -0.378847 | 0.008069 | hypomethylated |
| cg17921439 | 0.71715 | 0.551514595 | -0.378876 | 0.000166 | hypomethylated |
| cg09361748 | 0.58069 | 0.446552973 | -0.378937 | 0.000277 | hypomethylated |
| cg16357353 | 0.5179  | 0.398255135 | -0.378981 | 0.000335 | hypomethylated |
| cg20765441 | 0.62597 | 0.481358378 | -0.378982 | 0.000741 | hypomethylated |



|            |         |             |           |          |                |
|------------|---------|-------------|-----------|----------|----------------|
| cg00250483 | 0.60839 | 0.467835676 | -0.378995 | 0.000102 | hypomethylated |
| cg06725798 | 0.79943 | 0.614721081 | -0.37904  | 2.10E-05 | hypomethylated |
| cg10727432 | 0.8252  | 0.634510811 | -0.379099 | 6.13E-06 | hypomethylated |
| cg07636761 | 0.66625 | 0.512230811 | -0.37927  | 0.000283 | hypomethylated |
| cg09690632 | 0.83661 | 0.643208108 | -0.37927  | 2.36E-06 | hypomethylated |
| cg15082824 | 0.71699 | 0.551223784 | -0.379315 | 0.000209 | hypomethylated |
| cg17422915 | 0.79411 | 0.610511351 | -0.379321 | 8.63E-05 | hypomethylated |
| cg18389931 | 0.73274 | 0.563285405 | -0.379435 | 1.66E-05 | hypomethylated |
| cg04629204 | 0.59053 | 0.453960541 | -0.379443 | 0.000209 | hypomethylated |
| cg13720262 | 0.81604 | 0.627307568 | -0.379467 | 0.000123 | hypomethylated |
| cg26462055 | 0.83293 | 0.640287568 | -0.379475 | 0.000142 | hypomethylated |
| cg18599081 | 0.67339 | 0.517635676 | -0.379505 | 0.003195 | hypomethylated |
| cg03752885 | 0.7118  | 0.547159459 | -0.379511 | 0.00096  | hypomethylated |
| cg22876402 | 0.82162 | 0.631574054 | -0.379519 | 3.95E-05 | hypomethylated |
| cg02821871 | 0.84071 | 0.646247568 | -0.379521 | 0.000103 | hypomethylated |
| cg16413327 | 0.85629 | 0.658217297 | -0.379536 | 1.52E-05 | hypomethylated |
| cg20793420 | 0.451   | 0.346672973 | -0.379552 | 0.00134  | hypomethylated |
| cg10407585 | 0.81354 | 0.625303784 | -0.379656 | 3.15E-05 | hypomethylated |
| cg13476123 | 0.72329 | 0.555923243 | -0.379689 | 6.01E-05 | hypomethylated |
| cg05255580 | 0.79638 | 0.612095676 | -0.3797   | 3.04E-06 | hypomethylated |
| cg04344000 | 0.75266 | 0.578491351 | -0.379703 | 0.000122 | hypomethylated |
| cg01532749 | 0.74398 | 0.571785405 | -0.37979  | 7.38E-05 | hypomethylated |
| cg27617775 | 0.81046 | 0.622868649 | -0.379813 | 2.10E-05 | hypomethylated |
| cg21545720 | 0.65885 | 0.506341622 | -0.379839 | 1.35E-05 | hypomethylated |
| cg07059469 | 0.64317 | 0.494281622 | -0.379867 | 0.001354 | hypomethylated |
| cg12533496 | 0.5151  | 0.395851351 | -0.379894 | 6.62E-05 | hypomethylated |
| cg22602105 | 0.62139 | 0.477524865 | -0.379923 | 0.00049  | hypomethylated |
| cg00409861 | 0.86638 | 0.665738919 | -0.380043 | 2.15E-05 | hypomethylated |
| cg12797987 | 0.83785 | 0.643798378 | -0.380083 | 5.12E-05 | hypomethylated |
| cg15068709 | 0.82871 | 0.636774054 | -0.380086 | 2.18E-05 | hypomethylated |
| cg10968815 | 0.79591 | 0.611551351 | -0.380132 | 2.89E-05 | hypomethylated |
| cg14612133 | 0.79973 | 0.614465946 | -0.38018  | 9.31E-06 | hypomethylated |
| cg26334507 | 0.8016  | 0.615867027 | -0.380264 | 0.000138 | hypomethylated |
| cg11816838 | 0.85498 | 0.656878378 | -0.380264 | 5.43E-06 | hypomethylated |
| cg25881535 | 0.66998 | 0.514727568 | -0.380309 | 0.000189 | hypomethylated |
| cg03637066 | 0.74036 | 0.568795676 | -0.380316 | 6.62E-05 | hypomethylated |
| cg26761744 | 0.85086 | 0.653688108 | -0.380319 | 4.82E-05 | hypomethylated |
| cg23051970 | 0.89061 | 0.68419027  | -0.380396 | 9.96E-06 | hypomethylated |
| cg09491901 | 0.78299 | 0.601475676 | -0.380487 | 6.78E-05 | hypomethylated |
| cg04903159 | 0.4906  | 0.376866486 | -0.380494 | 0.000523 | hypomethylated |
| cg00510330 | 0.81604 | 0.626848649 | -0.380523 | 0.000142 | hypomethylated |
| cg25343204 | 0.888   | 0.68212     | -0.380534 | 3.00E-05 | hypomethylated |
| cg16678159 | 0.71589 | 0.549911892 | -0.380537 | 0.000293 | hypomethylated |
| cg01806427 | 0.79243 | 0.608673514 | -0.380615 | 0.000426 | hypomethylated |
| cg17412005 | 0.62411 | 0.479384324 | -0.380618 | 0.001031 | hypomethylated |
| cg23322223 | 0.85186 | 0.654321081 | -0.380618 | 3.04E-05 | hypomethylated |
| cg27386326 | 0.85867 | 0.659511351 | -0.380706 | 7.29E-05 | hypomethylated |
| cg14373988 | 0.89667 | 0.688693514 | -0.380715 | 5.06E-05 | hypomethylated |
| cg09231675 | 0.87641 | 0.673131892 | -0.380717 | 1.49E-06 | hypomethylated |
| cg06534586 | 0.90101 | 0.692006486 | -0.380758 | 7.12E-06 | hypomethylated |
| cg01055129 | 0.82714 | 0.635271351 | -0.380759 | 1.50E-05 | hypomethylated |
| cg20124610 | 0.54541 | 0.418892432 | -0.380761 | 1.52E-05 | hypomethylated |
| cg00789198 | 0.77191 | 0.592831892 | -0.38081  | 8.63E-05 | hypomethylated |
| cg23087707 | 0.91676 | 0.704066486 | -0.380832 | 4.48E-06 | hypomethylated |
| cg05708497 | 0.62792 | 0.482228108 | -0.380865 | 6.93E-06 | hypomethylated |
| cg06927337 | 0.76317 | 0.58602973  | -0.381031 | 7.12E-05 | hypomethylated |
| cg09049451 | 0.9132  | 0.701210811 | -0.381083 | 9.38E-07 | hypomethylated |
| cg21449569 | 0.84091 | 0.645701081 | -0.381085 | 4.26E-05 | hypomethylated |

|            |         |             |           |          |                |
|------------|---------|-------------|-----------|----------|----------------|
| cg26680675 | 0.84728 | 0.650571892 | -0.38113  | 1.92E-05 | hypomethylated |
| cg25215890 | 0.60423 | 0.463944865 | -0.381144 | 0.000545 | hypomethylated |
| cg03255379 | 0.83373 | 0.640144865 | -0.381182 | 5.73E-06 | hypomethylated |
| cg14485901 | 0.78678 | 0.604093514 | -0.381188 | 3.07E-05 | hypomethylated |
| cg24450508 | 0.71516 | 0.549077297 | -0.381257 | 0.00097  | hypomethylated |
| cg26034934 | 0.60636 | 0.465518378 | -0.381336 | 8.42E-05 | hypomethylated |
| cg11307623 | 0.65504 | 0.502883243 | -0.38136  | 6.93E-06 | hypomethylated |
| cg00578614 | 0.76326 | 0.585917838 | -0.381476 | 0.001031 | hypomethylated |
| cg26748297 | 0.84062 | 0.645218378 | -0.381666 | 5.43E-06 | hypomethylated |
| cg04528382 | 0.69775 | 0.535558378 | -0.381666 | 1.71E-05 | hypomethylated |
| cg05367967 | 0.89037 | 0.683381081 | -0.381715 | 7.65E-05 | hypomethylated |
| cg04450003 | 0.76404 | 0.586413514 | -0.38173  | 0.000313 | hypomethylated |
| cg15122966 | 0.61877 | 0.474904324 | -0.381766 | 0.000191 | hypomethylated |
| cg13275679 | 0.74002 | 0.567942703 | -0.381819 | 1.46E-05 | hypomethylated |
| cg25080973 | 0.71758 | 0.550712973 | -0.381839 | 4.36E-05 | hypomethylated |
| cg06765219 | 0.70114 | 0.538092973 | -0.381847 | 0.0003   | hypomethylated |
| cg09490007 | 0.70931 | 0.544342703 | -0.381901 | 1.58E-05 | hypomethylated |
| cg24080086 | 0.79842 | 0.612725946 | -0.381906 | 1.15E-05 | hypomethylated |
| cg09550697 | 0.94775 | 0.727318378 | -0.38192  | 7.62E-06 | hypomethylated |
| cg01999046 | 0.85122 | 0.653174595 | -0.382063 | 0.000142 | hypomethylated |
| cg09110274 | 0.79903 | 0.613124865 | -0.382069 | 1.12E-05 | hypomethylated |
| cg15114431 | 0.86407 | 0.663028649 | -0.382077 | 1.46E-05 | hypomethylated |
| cg18565795 | 0.90506 | 0.694465405 | -0.382111 | 7.52E-06 | hypomethylated |
| cg03678062 | 0.67998 | 0.521714054 | -0.382233 | 0.001074 | hypomethylated |
| cg27212428 | 0.75337 | 0.577972432 | -0.382358 | 4.36E-05 | hypomethylated |
| cg24314434 | 0.71132 | 0.545694054 | -0.382406 | 5.58E-05 | hypomethylated |
| cg20951444 | 0.70715 | 0.542478378 | -0.382451 | 2.92E-05 | hypomethylated |
| cg24282479 | 0.8361  | 0.641396757 | -0.382458 | 5.86E-05 | hypomethylated |
| cg00284420 | 0.97098 | 0.744845946 | -0.3825   | 3.44E-06 | hypomethylated |
| cg18983132 | 0.73815 | 0.566215135 | -0.382564 | 0.000613 | hypomethylated |
| cg08856033 | 0.57304 | 0.439548108 | -0.382615 | 0.000163 | hypomethylated |
| cg11401820 | 0.86699 | 0.664969189 | -0.382728 | 7.22E-06 | hypomethylated |
| cg11580615 | 0.86282 | 0.661757838 | -0.382756 | 1.01E-05 | hypomethylated |
| cg11056055 | 0.87769 | 0.673149189 | -0.382785 | 1.89E-05 | hypomethylated |
| cg01886524 | 0.66811 | 0.512405405 | -0.3828   | 3.23E-05 | hypomethylated |
| cg19902593 | 0.74088 | 0.568200541 | -0.38284  | 0.000165 | hypomethylated |
| cg02520399 | 0.89305 | 0.684868108 | -0.382915 | 4.48E-06 | hypomethylated |
| cg26433494 | 0.76222 | 0.584523243 | -0.382947 | 1.35E-05 | hypomethylated |
| cg08800670 | 0.56759 | 0.435255135 | -0.382988 | 6.95E-05 | hypomethylated |
| cg21669226 | 0.90321 | 0.692616216 | -0.383005 | 3.21E-06 | hypomethylated |
| cg27144368 | 0.72798 | 0.558229189 | -0.383041 | 0.000528 | hypomethylated |
| cg06768670 | 0.61128 | 0.468724865 | -0.383092 | 0.001368 | hypomethylated |
| cg11585357 | 0.91046 | 0.69813027  | -0.383099 | 2.21E-05 | hypomethylated |
| cg27050612 | 0.52582 | 0.403181081 | -0.383141 | 0.001327 | hypomethylated |
| cg19554281 | 0.79076 | 0.606315135 | -0.383172 | 0.000195 | hypomethylated |
| cg15206981 | 0.82169 | 0.630022703 | -0.38319  | 2.24E-05 | hypomethylated |
| cg06074534 | 0.9389  | 0.719881081 | -0.383213 | 3.15E-05 | hypomethylated |
| cg16650212 | 0.74218 | 0.569045946 | -0.383224 | 4.20E-05 | hypomethylated |
| cg27528222 | 0.74386 | 0.57033027  | -0.383234 | 0.000262 | hypomethylated |
| cg26588061 | 0.76449 | 0.586092973 | -0.383368 | 0.000674 | hypomethylated |
| cg12899248 | 0.85374 | 0.654482703 | -0.383442 | 1.25E-05 | hypomethylated |
| cg12821315 | 0.57557 | 0.441196216 | -0.383571 | 3.49E-05 | hypomethylated |
| cg01503938 | 0.69209 | 0.530510811 | -0.383578 | 1.05E-05 | hypomethylated |
| cg06047270 | 0.51136 | 0.391963784 | -0.383619 | 0.006451 | hypomethylated |
| cg13856405 | 0.69622 | 0.533645405 | -0.383662 | 1.89E-05 | hypomethylated |
| cg09578155 | 0.53507 | 0.41012     | -0.383682 | 0.002231 | hypomethylated |
| cg02066184 | 0.85216 | 0.653148108 | -0.383714 | 7.93E-05 | hypomethylated |
| cg26144734 | 0.75405 | 0.577905405 | -0.383827 | 2.36E-06 | hypomethylated |

|            |         |             |           |          |                |
|------------|---------|-------------|-----------|----------|----------------|
| cg06966613 | 0.70304 | 0.53879027  | -0.383883 | 1.75E-05 | hypomethylated |
| cg13563390 | 0.81353 | 0.623438378 | -0.383949 | 6.86E-05 | hypomethylated |
| cg14711976 | 0.72474 | 0.555383784 | -0.383978 | 0.000313 | hypomethylated |
| cg27409154 | 0.69571 | 0.533133514 | -0.383989 | 0.000174 | hypomethylated |
| cg20443357 | 0.80455 | 0.616515135 | -0.384046 | 4.24E-06 | hypomethylated |
| cg16806195 | 0.57073 | 0.437341081 | -0.38405  | 0.000104 | hypomethylated |
| cg22469948 | 0.59139 | 0.453164324 | -0.384076 | 8.22E-05 | hypomethylated |
| cg06818582 | 0.72675 | 0.556857297 | -0.384152 | 1.15E-05 | hypomethylated |
| cg09282946 | 0.78954 | 0.604910811 | -0.38429  | 4.36E-06 | hypomethylated |
| cg03953069 | 0.51861 | 0.397311351 | -0.38438  | 0.000262 | hypomethylated |
| cg14200470 | 0.6632  | 0.508052432 | -0.384467 | 1.56E-05 | hypomethylated |
| cg02723964 | 0.75725 | 0.5801      | -0.384468 | 3.40E-05 | hypomethylated |
| cg14497203 | 0.78684 | 0.602758378 | -0.384491 | 3.90E-05 | hypomethylated |
| cg08411049 | 0.73595 | 0.56376973  | -0.384502 | 2.45E-05 | hypomethylated |
| cg15849872 | 0.50609 | 0.387679459 | -0.38453  | 3.40E-05 | hypomethylated |
| cg18593210 | 0.71655 | 0.548885946 | -0.384561 | 3.79E-06 | hypomethylated |
| cg14568203 | 0.82918 | 0.635144865 | -0.3846   | 4.36E-06 | hypomethylated |
| cg13027727 | 0.5443  | 0.416928108 | -0.384603 | 4.53E-05 | hypomethylated |
| cg11426170 | 0.72079 | 0.552117297 | -0.384604 | 0.000378 | hypomethylated |
| cg14976391 | 0.62126 | 0.475872973 | -0.384621 | 0.000287 | hypomethylated |
| cg11228744 | 0.75698 | 0.579825946 | -0.384635 | 0.000132 | hypomethylated |
| cg17742559 | 0.66217 | 0.507196216 | -0.384658 | 0.000681 | hypomethylated |
| cg25840318 | 0.84858 | 0.649967568 | -0.384683 | 7.29E-05 | hypomethylated |
| cg07795964 | 0.96115 | 0.736153514 | -0.384755 | 3.54E-06 | hypomethylated |
| cg16723982 | 0.64141 | 0.491260541 | -0.384758 | 0.000435 | hypomethylated |
| cg11261264 | 0.90732 | 0.69490973  | -0.384786 | 1.09E-05 | hypomethylated |
| cg25797454 | 0.70997 | 0.543758919 | -0.384791 | 0.000129 | hypomethylated |
| cg00411358 | 0.78016 | 0.597499459 | -0.384833 | 2.04E-05 | hypomethylated |
| cg09193477 | 0.87306 | 0.668642162 | -0.384846 | 9.27E-05 | hypomethylated |
| cg15647617 | 0.57257 | 0.438505405 | -0.384857 | 0.00035  | hypomethylated |
| cg23024102 | 0.63564 | 0.486785405 | -0.384924 | 8.42E-05 | hypomethylated |
| cg04802386 | 0.86875 | 0.665299459 | -0.384937 | 6.31E-05 | hypomethylated |
| cg18761763 | 0.82315 | 0.630354054 | -0.384993 | 1.54E-05 | hypomethylated |
| cg07064720 | 0.61985 | 0.474657838 | -0.385031 | 0.00029  | hypomethylated |
| cg08203210 | 0.7935  | 0.607614054 | -0.385075 | 6.01E-05 | hypomethylated |
| cg19244553 | 0.90194 | 0.690650811 | -0.385075 | 3.40E-05 | hypomethylated |
| cg07855572 | 0.5831  | 0.446494595 | -0.385101 | 3.67E-05 | hypomethylated |
| cg24570042 | 0.61697 | 0.472419459 | -0.385132 | 0.002432 | hypomethylated |
| cg14151317 | 0.91968 | 0.70416     | -0.385229 | 5.00E-06 | hypomethylated |
| cg04737185 | 0.89959 | 0.68876     | -0.385266 | 2.10E-05 | hypomethylated |
| cg00470341 | 0.79557 | 0.609056757 | -0.385412 | 0.000626 | hypomethylated |
| cg10635092 | 0.62624 | 0.479422703 | -0.385417 | 0.000361 | hypomethylated |
| cg11220043 | 0.893   | 0.683642703 | -0.385418 | 8.60E-06 | hypomethylated |
| cg12801391 | 0.82519 | 0.631722162 | -0.385436 | 2.27E-05 | hypomethylated |
| cg21518261 | 0.77331 | 0.591962162 | -0.385542 | 8.95E-06 | hypomethylated |
| cg12434312 | 0.48849 | 0.373927027 | -0.385572 | 0.000417 | hypomethylated |
| cg07759857 | 0.86613 | 0.66296973  | -0.385641 | 2.27E-05 | hypomethylated |
| cg01792640 | 0.90451 | 0.692343243 | -0.385649 | 1.05E-05 | hypomethylated |
| cg03612692 | 0.61432 | 0.470212432 | -0.385678 | 4.58E-05 | hypomethylated |
| cg26910384 | 0.61783 | 0.47288     | -0.385736 | 4.26E-05 | hypomethylated |
| cg01461211 | 0.60845 | 0.465683243 | -0.38579  | 7.47E-05 | hypomethylated |
| cg09644662 | 0.82477 | 0.631212973 | -0.385865 | 9.95E-05 | hypomethylated |
| cg12989498 | 0.78068 | 0.597439459 | -0.385939 | 3.00E-05 | hypomethylated |
| cg26528298 | 0.76215 | 0.583252432 | -0.385955 | 2.27E-05 | hypomethylated |
| cg12967723 | 0.6011  | 0.459995135 | -0.385986 | 0.000369 | hypomethylated |
| cg25844590 | 0.85402 | 0.653543243 | -0.385987 | 2.71E-05 | hypomethylated |
| cg14418857 | 0.71847 | 0.549793514 | -0.386038 | 0.000718 | hypomethylated |
| cg01054938 | 0.75473 | 0.577521081 | -0.386087 | 0.000187 | hypomethylated |

|            |         |             |           |          |                |
|------------|---------|-------------|-----------|----------|----------------|
| cg13817395 | 0.58371 | 0.446627027 | -0.386181 | 0.000123 | hypomethylated |
| cg02512902 | 0.69972 | 0.535387027 | -0.386196 | 0.00134  | hypomethylated |
| cg08616234 | 0.84021 | 0.642877297 | -0.386207 | 2.71E-05 | hypomethylated |
| cg09142858 | 0.6259  | 0.478888649 | -0.386242 | 2.87E-06 | hypomethylated |
| cg03249047 | 0.64165 | 0.490937838 | -0.386246 | 0.000106 | hypomethylated |
| cg23382741 | 0.86075 | 0.658558378 | -0.386283 | 8.37E-06 | hypomethylated |
| cg15006627 | 0.62928 | 0.481456757 | -0.386296 | 2.45E-05 | hypomethylated |
| cg23517752 | 0.71341 | 0.545805405 | -0.386345 | 2.71E-05 | hypomethylated |
| cg21026469 | 0.91824 | 0.702500541 | -0.386372 | 2.13E-05 | hypomethylated |
| cg15863552 | 0.9164  | 0.70108973  | -0.386378 | 0.000104 | hypomethylated |
| cg11240431 | 0.69583 | 0.532327027 | -0.386422 | 2.27E-05 | hypomethylated |
| cg05626927 | 0.73204 | 0.560015135 | -0.386457 | 0.000262 | hypomethylated |
| cg16447311 | 0.81297 | 0.621885405 | -0.386553 | 0.000132 | hypomethylated |
| cg13168117 | 0.76451 | 0.584775676 | -0.386652 | 9.05E-05 | hypomethylated |
| cg04617606 | 0.76007 | 0.581377838 | -0.386656 | 0.000135 | hypomethylated |
| cg19911494 | 0.85516 | 0.654052973 | -0.386787 | 1.99E-05 | hypomethylated |
| cg01182154 | 0.87327 | 0.667901081 | -0.386793 | 8.83E-06 | hypomethylated |
| cg01629435 | 0.75251 | 0.575511892 | -0.386865 | 0.000219 | hypomethylated |
| cg01290136 | 0.76481 | 0.584904324 | -0.386901 | 6.31E-05 | hypomethylated |
| cg00302479 | 0.55501 | 0.424452973 | -0.386909 | 0.001949 | hypomethylated |
| cg10921168 | 0.69485 | 0.531354054 | -0.387028 | 0.000148 | hypomethylated |
| cg03723321 | 0.64811 | 0.495590811 | -0.387089 | 2.85E-05 | hypomethylated |
| cg15892280 | 0.61872 | 0.473112973 | -0.387102 | 0.001395 | hypomethylated |
| cg11684549 | 0.79061 | 0.604513514 | -0.387192 | 5.19E-05 | hypomethylated |
| cg22083047 | 0.75126 | 0.574420541 | -0.387205 | 0.000234 | hypomethylated |
| cg09123615 | 0.78032 | 0.59664     | -0.387205 | 2.42E-06 | hypomethylated |
| cg02901644 | 0.68587 | 0.524405405 | -0.387253 | 0.000374 | hypomethylated |
| cg02246725 | 0.7176  | 0.548656216 | -0.387277 | 0.000138 | hypomethylated |
| cg19554257 | 0.62061 | 0.474491351 | -0.387305 | 0.003225 | hypomethylated |
| cg11721177 | 0.5512  | 0.421384324 | -0.387439 | 0.000262 | hypomethylated |
| cg13167431 | 0.60631 | 0.463514054 | -0.387443 | 0.000822 | hypomethylated |
| cg12748639 | 0.58801 | 0.449511351 | -0.387483 | 0.000395 | hypomethylated |
| cg05468458 | 0.62752 | 0.479708649 | -0.387503 | 0.000142 | hypomethylated |
| cg14503815 | 0.81663 | 0.62426973  | -0.387513 | 5.45E-05 | hypomethylated |
| cg05997730 | 0.56702 | 0.433450811 | -0.387531 | 0.000107 | hypomethylated |
| cg23907852 | 0.58742 | 0.449031892 | -0.387574 | 2.71E-05 | hypomethylated |
| cg17315844 | 0.89941 | 0.687502703 | -0.387614 | 2.38E-05 | hypomethylated |
| cg19771372 | 0.37479 | 0.286484865 | -0.387624 | 6.46E-05 | hypomethylated |
| cg08644381 | 0.66301 | 0.506794595 | -0.387629 | 3.15E-05 | hypomethylated |
| cg00600454 | 0.6545  | 0.500271892 | -0.387681 | 0.000116 | hypomethylated |
| cg24446429 | 0.81201 | 0.620622703 | -0.387781 | 0.000135 | hypomethylated |
| cg07204711 | 0.75763 | 0.579055135 | -0.387793 | 2.15E-05 | hypomethylated |
| cg23473088 | 0.88632 | 0.677399459 | -0.387821 | 5.58E-06 | hypomethylated |
| cg21341520 | 0.53547 | 0.40922     | -0.387929 | 0.000198 | hypomethylated |
| cg00160478 | 0.62569 | 0.478158378 | -0.387959 | 3.15E-05 | hypomethylated |
| cg10018933 | 0.74786 | 0.571504865 | -0.388002 | 0.000306 | hypomethylated |
| cg18504989 | 0.68592 | 0.524160541 | -0.388032 | 1.06E-05 | hypomethylated |
| cg06209035 | 0.77987 | 0.595945405 | -0.388053 | 3.95E-05 | hypomethylated |
| cg25976170 | 0.80215 | 0.612961622 | -0.388075 | 0.000106 | hypomethylated |
| cg08466082 | 0.87233 | 0.666536757 | -0.38819  | 3.85E-05 | hypomethylated |
| cg04643397 | 0.82566 | 0.63084     | -0.388274 | 6.46E-05 | hypomethylated |
| cg05301124 | 0.85852 | 0.655939459 | -0.388289 | 4.12E-06 | hypomethylated |
| cg09985802 | 0.61488 | 0.469762162 | -0.388374 | 9.27E-05 | hypomethylated |
| cg14327296 | 0.5463  | 0.417334054 | -0.388491 | 0.00099  | hypomethylated |
| cg13917589 | 0.907   | 0.692875676 | -0.388506 | 9.31E-06 | hypomethylated |
| cg04976075 | 0.5642  | 0.430994595 | -0.388537 | 5.31E-05 | hypomethylated |
| cg01504030 | 0.83033 | 0.634287027 | -0.388549 | 5.58E-05 | hypomethylated |
| cg26337559 | 0.90593 | 0.692035676 | -0.388553 | 5.93E-05 | hypomethylated |

|            |         |             |           |          |                |
|------------|---------|-------------|-----------|----------|----------------|
| cg21865249 | 0.65183 | 0.497907027 | -0.388619 | 0.000274 | hypomethylated |
| cg15827285 | 0.7461  | 0.569892432 | -0.388679 | 0.000633 | hypomethylated |
| cg09414673 | 0.64493 | 0.492611892 | -0.388691 | 0.000219 | hypomethylated |
| cg00264129 | 0.77391 | 0.591124324 | -0.388704 | 0.000123 | hypomethylated |
| cg22862656 | 0.75148 | 0.573982162 | -0.388729 | 0.000189 | hypomethylated |
| cg18345635 | 0.55664 | 0.425123243 | -0.388863 | 0.00421  | hypomethylated |
| cg10372302 | 0.79507 | 0.607200541 | -0.388909 | 5.12E-05 | hypomethylated |
| cg13204236 | 0.70867 | 0.541208108 | -0.388931 | 0.000335 | hypomethylated |
| cg16906765 | 0.54243 | 0.414243243 | -0.388959 | 0.000138 | hypomethylated |
| cg02169981 | 0.83857 | 0.640378919 | -0.389005 | 6.93E-06 | hypomethylated |
| cg16048817 | 0.74415 | 0.568252432 | -0.389062 | 7.52E-06 | hypomethylated |
| cg05757448 | 0.84134 | 0.642465405 | -0.38907  | 6.15E-05 | hypomethylated |
| cg02205193 | 0.85227 | 0.650805405 | -0.389084 | 2.27E-05 | hypomethylated |
| cg18699466 | 0.789   | 0.602471351 | -0.389133 | 2.89E-05 | hypomethylated |
| cg22830638 | 0.80531 | 0.61486973  | -0.389263 | 5.14E-06 | hypomethylated |
| cg07635132 | 0.6899  | 0.526733514 | -0.389314 | 0.000435 | hypomethylated |
| cg09373676 | 0.88062 | 0.672326486 | -0.389358 | 6.62E-05 | hypomethylated |
| cg06240652 | 0.80655 | 0.615736757 | -0.38945  | 3.21E-06 | hypomethylated |
| cg00917471 | 0.65092 | 0.496918919 | -0.38947  | 0.00099  | hypomethylated |
| cg13811955 | 0.65407 | 0.499320541 | -0.389479 | 3.15E-05 | hypomethylated |
| cg01742357 | 0.56617 | 0.432214054 | -0.389489 | 0.000464 | hypomethylated |
| cg11300809 | 0.43117 | 0.329154595 | -0.389491 | 0.000283 | hypomethylated |
| cg06900571 | 0.89141 | 0.680472973 | -0.389551 | 1.50E-05 | hypomethylated |
| cg21092021 | 0.69243 | 0.528555676 | -0.389613 | 2.89E-05 | hypomethylated |
| cg18010085 | 0.85824 | 0.655102703 | -0.38966  | 1.99E-05 | hypomethylated |
| cg19358608 | 0.73561 | 0.561495676 | -0.389666 | 0.001839 | hypomethylated |
| cg25042258 | 0.72467 | 0.55312973  | -0.389706 | 1.56E-05 | hypomethylated |
| cg26019472 | 0.79811 | 0.609175676 | -0.389729 | 0.000726 | hypomethylated |
| cg05302489 | 0.83712 | 0.638936216 | -0.389763 | 6.84E-06 | hypomethylated |
| cg19471433 | 0.72298 | 0.551817297 | -0.389765 | 0.000313 | hypomethylated |
| cg25574111 | 0.52704 | 0.402246486 | -0.389833 | 0.000342 | hypomethylated |
| cg10622536 | 0.83339 | 0.63605027  | -0.389851 | 1.71E-05 | hypomethylated |
| cg12768145 | 0.86459 | 0.659853514 | -0.38987  | 4.48E-06 | hypomethylated |
| cg15730481 | 0.71931 | 0.548968108 | -0.389891 | 0.000155 | hypomethylated |
| cg06415153 | 0.53945 | 0.411696216 | -0.389909 | 0.000166 | hypomethylated |
| cg11031737 | 0.76721 | 0.585517297 | -0.38991  | 0.000251 | hypomethylated |
| cg01544270 | 0.61857 | 0.472035135 | -0.390043 | 0.000189 | hypomethylated |
| cg10307345 | 0.54242 | 0.413918919 | -0.390062 | 0.000135 | hypomethylated |
| cg24773412 | 0.83417 | 0.636532432 | -0.390107 | 1.71E-05 | hypomethylated |
| cg05198969 | 0.7928  | 0.604962703 | -0.390111 | 5.25E-05 | hypomethylated |
| cg04294383 | 0.92099 | 0.702742703 | -0.390189 | 1.88E-06 | hypomethylated |
| cg22576236 | 0.54736 | 0.417642162 | -0.390223 | 0.000517 | hypomethylated |
| cg15902830 | 0.87918 | 0.670815135 | -0.390243 | 2.27E-05 | hypomethylated |
| cg25291404 | 0.60965 | 0.465145946 | -0.390298 | 6.15E-05 | hypomethylated |
| cg16281322 | 0.55316 | 0.422038378 | -0.390323 | 9.72E-05 | hypomethylated |
| cg03069731 | 0.78164 | 0.596341622 | -0.390365 | 0.000445 | hypomethylated |
| cg14663278 | 0.72817 | 0.555543243 | -0.390376 | 8.37E-06 | hypomethylated |
| cg05293365 | 0.60076 | 0.458287027 | -0.390537 | 0.01146  | hypomethylated |
| cg14478475 | 0.73657 | 0.561880541 | -0.390559 | 4.20E-05 | hypomethylated |
| cg12017722 | 0.85274 | 0.650485405 | -0.390589 | 3.15E-05 | hypomethylated |
| cg08555912 | 0.76357 | 0.58246     | -0.390601 | 9.69E-06 | hypomethylated |
| cg07249224 | 0.73975 | 0.564256757 | -0.390686 | 0.000317 | hypomethylated |
| cg03669367 | 0.74147 | 0.565567568 | -0.390689 | 3.04E-05 | hypomethylated |
| cg01001472 | 0.83939 | 0.640190811 | -0.390839 | 3.00E-05 | hypomethylated |
| cg24676612 | 0.7707  | 0.587778919 | -0.390896 | 4.36E-05 | hypomethylated |
| cg15280363 | 0.52961 | 0.403908108 | -0.390903 | 0.000469 | hypomethylated |
| cg11685391 | 0.62426 | 0.476084324 | -0.39093  | 0.001734 | hypomethylated |
| cg27640064 | 0.68518 | 0.522541081 | -0.390939 | 0.007282 | hypomethylated |

|            |         |             |           |          |                |
|------------|---------|-------------|-----------|----------|----------------|
| cg07408148 | 0.73798 | 0.562785946 | -0.390995 | 0.00043  | hypomethylated |
| cg03012028 | 0.51931 | 0.396018378 | -0.391029 | 6.08E-05 | hypomethylated |
| cg13434570 | 0.87603 | 0.668022703 | -0.391083 | 1.54E-05 | hypomethylated |
| cg02607319 | 0.59886 | 0.456661081 | -0.391095 | 0.000195 | hypomethylated |
| cg10825234 | 0.81966 | 0.625027027 | -0.391107 | 3.32E-05 | hypomethylated |
| cg03883572 | 0.68678 | 0.5237      | -0.391107 | 0.004365 | hypomethylated |
| cg26861995 | 0.70211 | 0.535387568 | -0.391113 | 0.004287 | hypomethylated |
| cg08715226 | 0.47812 | 0.364575135 | -0.391157 | 0.001587 | hypomethylated |
| cg16136068 | 0.83591 | 0.637338378 | -0.391288 | 8.42E-05 | hypomethylated |
| cg23580024 | 0.96101 | 0.732714054 | -0.391301 | 6.66E-06 | hypomethylated |
| cg15323253 | 0.76908 | 0.586375135 | -0.39131  | 0.000374 | hypomethylated |
| cg27568165 | 0.6839  | 0.521416216 | -0.39135  | 8.22E-05 | hypomethylated |
| cg13956452 | 0.71285 | 0.543485946 | -0.391356 | 1.04E-05 | hypomethylated |
| cg26377677 | 0.7377  | 0.562422703 | -0.391379 | 3.11E-05 | hypomethylated |
| cg26948274 | 0.55203 | 0.420854054 | -0.391427 | 8.15E-06 | hypomethylated |
| cg09373727 | 0.86929 | 0.662715676 | -0.391448 | 3.57E-05 | hypomethylated |
| cg20806725 | 0.82588 | 0.62961027  | -0.391473 | 5.06E-05 | hypomethylated |
| cg24910161 | 0.68234 | 0.520155676 | -0.391547 | 1.66E-05 | hypomethylated |
| cg12584520 | 0.89335 | 0.681001622 | -0.391567 | 2.54E-05 | hypomethylated |
| cg17104766 | 0.84062 | 0.640791892 | -0.391598 | 2.71E-05 | hypomethylated |
| cg22623273 | 0.73986 | 0.563944324 | -0.3917   | 0.000103 | hypomethylated |
| cg24237576 | 0.79511 | 0.606037297 | -0.391748 | 2.64E-06 | hypomethylated |
| cg18119644 | 0.95785 | 0.730056757 | -0.391791 | 6.05E-06 | hypomethylated |
| cg10419556 | 0.62144 | 0.473632432 | -0.391847 | 0.000271 | hypomethylated |
| cg18919659 | 0.65418 | 0.498582162 | -0.391856 | 1.15E-05 | hypomethylated |
| cg09741917 | 0.60633 | 0.462094054 | -0.391917 | 0.000202 | hypomethylated |
| cg08455073 | 0.73059 | 0.556781081 | -0.391952 | 0.000245 | hypomethylated |
| cg22569154 | 0.79177 | 0.603392973 | -0.391984 | 3.23E-05 | hypomethylated |
| cg04033718 | 0.66663 | 0.508009189 | -0.392032 | 0.000117 | hypomethylated |
| cg21658153 | 0.84012 | 0.64020973  | -0.392051 | 2.04E-05 | hypomethylated |
| cg25366404 | 0.6194  | 0.471987568 | -0.392123 | 3.57E-05 | hypomethylated |
| cg21498490 | 0.90346 | 0.688432973 | -0.392145 | 6.70E-05 | hypomethylated |
| cg03023237 | 0.71622 | 0.545734595 | -0.392203 | 1.35E-05 | hypomethylated |
| cg14137548 | 0.66293 | 0.505124865 | -0.392216 | 6.46E-05 | hypomethylated |
| cg10325497 | 0.57961 | 0.441636757 | -0.392222 | 1.54E-05 | hypomethylated |
| cg03286735 | 0.87065 | 0.663363243 | -0.392294 | 2.27E-05 | hypomethylated |
| cg15246238 | 0.76962 | 0.586330811 | -0.392431 | 0.000262 | hypomethylated |
| cg16157895 | 0.78595 | 0.598664324 | -0.39269  | 2.39E-05 | hypomethylated |
| cg06852309 | 0.61665 | 0.469677297 | -0.392782 | 2.35E-05 | hypomethylated |
| cg04266474 | 0.79851 | 0.608097838 | -0.393007 | 1.25E-05 | hypomethylated |
| cg25963412 | 0.78745 | 0.59962973  | -0.393116 | 9.31E-06 | hypomethylated |
| cg06730183 | 0.89581 | 0.682138378 | -0.393128 | 4.42E-06 | hypomethylated |
| cg26346796 | 0.57069 | 0.434563243 | -0.393141 | 8.22E-05 | hypomethylated |
| cg21776813 | 0.78519 | 0.59788     | -0.393186 | 2.27E-05 | hypomethylated |
| cg25599065 | 0.73606 | 0.560436757 | -0.393272 | 2.27E-05 | hypomethylated |
| cg09639264 | 0.74267 | 0.565461622 | -0.393292 | 5.89E-06 | hypomethylated |
| cg13783238 | 0.79113 | 0.602356757 | -0.393297 | 0.000506 | hypomethylated |
| cg24526899 | 0.67423 | 0.513297838 | -0.393445 | 0.00028  | hypomethylated |
| cg11600991 | 0.66647 | 0.507385405 | -0.393458 | 1.89E-05 | hypomethylated |
| cg13413982 | 0.8317  | 0.633142703 | -0.393533 | 1.54E-05 | hypomethylated |
| cg24793722 | 0.5145  | 0.391660541 | -0.393567 | 0.000214 | hypomethylated |
| cg09837037 | 0.77969 | 0.593515676 | -0.393614 | 0.000117 | hypomethylated |
| cg27504861 | 0.7109  | 0.541124865 | -0.393685 | 0.000805 | hypomethylated |
| cg20418529 | 0.80947 | 0.616144865 | -0.393708 | 0.000454 | hypomethylated |
| cg14291900 | 0.87021 | 0.662367027 | -0.393733 | 9.72E-05 | hypomethylated |
| cg05134325 | 0.69208 | 0.52673027  | -0.393874 | 0.000327 | hypomethylated |
| cg04287684 | 0.86215 | 0.656150811 | -0.393911 | 2.36E-06 | hypomethylated |
| cg08244028 | 0.77159 | 0.587217297 | -0.39394  | 2.45E-05 | hypomethylated |

|            |         |             |           |          |                |
|------------|---------|-------------|-----------|----------|----------------|
| cg21481966 | 0.58481 | 0.445047027 | -0.39401  | 2.21E-05 | hypomethylated |
| cg13249774 | 0.86901 | 0.661305405 | -0.394056 | 1.50E-05 | hypomethylated |
| cg25141995 | 0.65068 | 0.495128649 | -0.394145 | 9.95E-05 | hypomethylated |
| cg10549018 | 0.63107 | 0.480194595 | -0.394181 | 0.001096 | hypomethylated |
| cg16381059 | 0.86478 | 0.658015135 | -0.394212 | 3.90E-06 | hypomethylated |
| cg26130864 | 0.80605 | 0.613322162 | -0.394224 | 1.46E-05 | hypomethylated |
| cg27196194 | 0.95232 | 0.724611351 | -0.394239 | 9.69E-06 | hypomethylated |
| cg16087826 | 0.81334 | 0.618848108 | -0.394273 | 2.45E-05 | hypomethylated |
| cg22715761 | 0.6629  | 0.504339459 | -0.394396 | 5.73E-06 | hypomethylated |
| cg03421657 | 0.71791 | 0.546182703 | -0.394419 | 0.000245 | hypomethylated |
| cg00292447 | 0.69164 | 0.526177297 | -0.394472 | 6.01E-05 | hypomethylated |
| cg08599249 | 0.53867 | 0.409802162 | -0.394474 | 0.000626 | hypomethylated |
| cg10503007 | 0.60596 | 0.460987027 | -0.394496 | 0.000132 | hypomethylated |
| cg25555068 | 0.68348 | 0.519951892 | -0.394521 | 1.92E-05 | hypomethylated |
| cg07392702 | 0.58943 | 0.448397838 | -0.394541 | 0.000152 | hypomethylated |
| cg04034685 | 0.58433 | 0.444512432 | -0.39456  | 0.001314 | hypomethylated |
| cg17475774 | 0.71311 | 0.542473514 | -0.394572 | 7.12E-06 | hypomethylated |
| cg16747928 | 0.59519 | 0.45272973  | -0.3947   | 0.001556 | hypomethylated |
| cg20918682 | 0.46223 | 0.351592432 | -0.394707 | 7.12E-05 | hypomethylated |
| cg05372679 | 0.81653 | 0.621084865 | -0.394715 | 8.52E-05 | hypomethylated |
| cg23838943 | 0.79226 | 0.602621622 | -0.394722 | 6.62E-05 | hypomethylated |
| cg04912542 | 0.71042 | 0.540355676 | -0.394763 | 1.28E-05 | hypomethylated |
| cg14763096 | 0.69879 | 0.531504865 | -0.394776 | 0.000178 | hypomethylated |
| cg06646708 | 0.72915 | 0.554596757 | -0.394776 | 0.000115 | hypomethylated |
| cg05774698 | 0.87599 | 0.666279459 | -0.394787 | 1.99E-05 | hypomethylated |
| cg27582563 | 0.72372 | 0.55044     | -0.394846 | 7.93E-05 | hypomethylated |
| cg21790314 | 0.7829  | 0.595432973 | -0.394889 | 5.14E-06 | hypomethylated |
| cg07955887 | 0.90919 | 0.691470811 | -0.394913 | 1.05E-05 | hypomethylated |
| cg18254586 | 0.74255 | 0.564661081 | -0.395103 | 0.000159 | hypomethylated |
| cg16585619 | 0.87965 | 0.668904324 | -0.39513  | 1.89E-05 | hypomethylated |
| cg12182580 | 0.83428 | 0.63434     | -0.395275 | 4.82E-05 | hypomethylated |
| cg08687540 | 0.75639 | 0.575114054 | -0.395282 | 0.002803 | hypomethylated |
| cg07724905 | 0.76152 | 0.578983784 | -0.395359 | 3.07E-05 | hypomethylated |
| cg12339133 | 0.71814 | 0.545997297 | -0.395371 | 0.000229 | hypomethylated |
| cg17006413 | 0.95066 | 0.722780541 | -0.395372 | 3.23E-05 | hypomethylated |
| cg02495552 | 0.97082 | 0.738057297 | -0.395471 | 3.04E-06 | hypomethylated |
| cg05954120 | 0.65122 | 0.495024324 | -0.395646 | 0.00012  | hypomethylated |
| cg21140160 | 0.80369 | 0.610904865 | -0.395691 | 2.74E-05 | hypomethylated |
| cg02597894 | 0.77125 | 0.586192432 | -0.395824 | 4.31E-05 | hypomethylated |
| cg24562081 | 0.85493 | 0.649792432 | -0.395827 | 1.06E-05 | hypomethylated |
| cg05024961 | 0.792   | 0.601962162 | -0.395828 | 1.68E-05 | hypomethylated |
| cg12338657 | 0.71986 | 0.547120541 | -0.395858 | 4.26E-05 | hypomethylated |
| cg23172853 | 0.71871 | 0.546227568 | -0.395908 | 0.000921 | hypomethylated |
| cg21686213 | 0.74459 | 0.565822703 | -0.396096 | 0.000681 | hypomethylated |
| cg11278107 | 0.92971 | 0.706448108 | -0.396197 | 7.86E-07 | hypomethylated |
| cg20286882 | 0.56167 | 0.426788108 | -0.396203 | 0.00031  | hypomethylated |
| cg20596647 | 0.57    | 0.433108649 | -0.396233 | 0.004059 | hypomethylated |
| cg10631289 | 0.70081 | 0.532476757 | -0.396305 | 0.000117 | hypomethylated |
| cg04993130 | 0.48186 | 0.366094595 | -0.396398 | 0.000464 | hypomethylated |
| cg03421300 | 0.86055 | 0.653780541 | -0.396453 | 3.21E-06 | hypomethylated |
| cg04823219 | 0.86829 | 0.65964     | -0.396498 | 1.87E-05 | hypomethylated |
| cg24775180 | 0.92844 | 0.705318378 | -0.396534 | 4.24E-06 | hypomethylated |
| cg10131810 | 0.8007  | 0.608187027 | -0.396747 | 7.22E-06 | hypomethylated |
| cg01552731 | 0.78954 | 0.599705946 | -0.396757 | 0.000268 | hypomethylated |
| cg04348222 | 0.5963  | 0.452921622 | -0.396777 | 0.000445 | hypomethylated |
| cg24315710 | 0.83206 | 0.631972973 | -0.396825 | 8.60E-06 | hypomethylated |
| cg14495958 | 0.60821 | 0.461938919 | -0.396867 | 3.27E-05 | hypomethylated |
| cg05347216 | 0.62486 | 0.47458     | -0.396882 | 0.00024  | hypomethylated |

|            |         |             |           |          |                |
|------------|---------|-------------|-----------|----------|----------------|
| cg05854892 | 0.78901 | 0.599225946 | -0.396943 | 2.64E-05 | hypomethylated |
| cg10447404 | 0.74093 | 0.562696216 | -0.396981 | 0.000174 | hypomethylated |
| cg09976369 | 0.56572 | 0.429627568 | -0.397002 | 0.004485 | hypomethylated |
| cg22636722 | 0.71791 | 0.545166486 | -0.397106 | 0.00095  | hypomethylated |
| cg03738656 | 0.78652 | 0.597196216 | -0.397278 | 0.000104 | hypomethylated |
| cg12970171 | 0.53813 | 0.408556757 | -0.397418 | 0.001734 | hypomethylated |
| cg21679730 | 0.84047 | 0.638066486 | -0.39749  | 4.47E-05 | hypomethylated |
| cg00992039 | 0.77481 | 0.588215676 | -0.397497 | 3.62E-05 | hypomethylated |
| cg02306654 | 0.9127  | 0.69282973  | -0.39764  | 4.73E-06 | hypomethylated |
| cg05556361 | 0.77955 | 0.59174     | -0.397678 | 0.000221 | hypomethylated |
| cg08343600 | 0.80645 | 0.61214     | -0.397723 | 3.67E-05 | hypomethylated |
| cg03590328 | 0.73998 | 0.561617838 | -0.397898 | 1.31E-05 | hypomethylated |
| cg03534410 | 0.65471 | 0.496898378 | -0.397905 | 2.45E-05 | hypomethylated |
| cg10557907 | 0.80096 | 0.607877297 | -0.39795  | 2.45E-05 | hypomethylated |
| cg04829830 | 0.80726 | 0.612645946 | -0.39798  | 0.000155 | hypomethylated |
| cg26992186 | 0.83914 | 0.636836757 | -0.397988 | 2.15E-05 | hypomethylated |
| cg05244766 | 0.85186 | 0.646438378 | -0.398103 | 1.12E-05 | hypomethylated |
| cg19907968 | 0.91357 | 0.693266486 | -0.398105 | 7.93E-06 | hypomethylated |
| cg08111922 | 0.61107 | 0.463702703 | -0.398138 | 0.000191 | hypomethylated |
| cg03544781 | 0.78415 | 0.595035135 | -0.398155 | 0.000563 | hypomethylated |
| cg15975171 | 0.80409 | 0.610151892 | -0.398189 | 4.10E-05 | hypomethylated |
| cg06801385 | 0.57708 | 0.437848108 | -0.398341 | 1.99E-05 | hypomethylated |
| cg21603144 | 0.71873 | 0.54530973  | -0.398374 | 0.000696 | hypomethylated |
| cg08917117 | 0.85007 | 0.644917838 | -0.398466 | 2.42E-05 | hypomethylated |
| cg03908688 | 0.80809 | 0.613062703 | -0.398481 | 1.88E-06 | hypomethylated |
| cg14139652 | 0.84413 | 0.64037027  | -0.398559 | 4.48E-06 | hypomethylated |
| cg01186980 | 0.67385 | 0.511188108 | -0.398573 | 0.000256 | hypomethylated |
| cg08836954 | 0.75252 | 0.570842703 | -0.398637 | 0.000112 | hypomethylated |
| cg27230882 | 0.72846 | 0.55258973  | -0.398641 | 0.000528 | hypomethylated |
| cg16762308 | 0.75884 | 0.57562     | -0.398679 | 1.37E-05 | hypomethylated |
| cg13420413 | 0.59609 | 0.452161622 | -0.398692 | 1.48E-05 | hypomethylated |
| cg15658306 | 0.54266 | 0.411613514 | -0.398758 | 0.001    | hypomethylated |
| cg21249659 | 0.75839 | 0.575242703 | -0.398769 | 0.000119 | hypomethylated |
| cg00633768 | 0.67507 | 0.512041622 | -0.398776 | 0.0003   | hypomethylated |
| cg21439129 | 0.76343 | 0.579051351 | -0.398805 | 1.71E-05 | hypomethylated |
| cg00941010 | 0.81602 | 0.618936757 | -0.398813 | 3.76E-05 | hypomethylated |
| cg24900654 | 0.55601 | 0.421708108 | -0.398866 | 6.31E-05 | hypomethylated |
| cg06269559 | 0.74806 | 0.567368108 | -0.398869 | 2.78E-05 | hypomethylated |
| cg03142741 | 0.82522 | 0.625885405 | -0.39888  | 6.84E-06 | hypomethylated |
| cg05450336 | 0.87294 | 0.662040541 | -0.398963 | 8.71E-06 | hypomethylated |
| cg01014224 | 0.68243 | 0.517527027 | -0.399047 | 0.000306 | hypomethylated |
| cg03511735 | 0.96337 | 0.730578378 | -0.399051 | 7.32E-06 | hypomethylated |
| cg02070740 | 0.83918 | 0.636372973 | -0.399108 | 0.000155 | hypomethylated |
| cg00460589 | 0.77042 | 0.584226486 | -0.399117 | 0.001141 | hypomethylated |
| cg22941294 | 0.73605 | 0.558162703 | -0.399118 | 0.000178 | hypomethylated |
| cg03016867 | 0.6031  | 0.45731027  | -0.399224 | 7.47E-05 | hypomethylated |
| cg10195726 | 0.71756 | 0.544077297 | -0.399288 | 1.58E-05 | hypomethylated |
| cg06161099 | 0.79622 | 0.60371027  | -0.399311 | 3.11E-05 | hypomethylated |
| cg13873263 | 0.66628 | 0.505183243 | -0.399322 | 0.009084 | hypomethylated |
| cg03440989 | 0.7689  | 0.582974595 | -0.399363 | 4.70E-05 | hypomethylated |
| cg21616935 | 0.72659 | 0.550883243 | -0.399395 | 0.001314 | hypomethylated |
| cg10683615 | 0.5017  | 0.380363784 | -0.399445 | 0.000219 | hypomethylated |
| cg20095398 | 0.62379 | 0.472922703 | -0.399456 | 0.000101 | hypomethylated |
| cg11530213 | 0.69066 | 0.523612973 | -0.399475 | 0.002649 | hypomethylated |
| cg10632507 | 0.72909 | 0.552743784 | -0.399486 | 6.46E-05 | hypomethylated |
| cg04404694 | 0.50051 | 0.379447027 | -0.3995   | 0.000358 | hypomethylated |
| cg13963210 | 0.74941 | 0.568128649 | -0.399538 | 5.45E-05 | hypomethylated |
| cg19260329 | 0.60918 | 0.461786486 | -0.399643 | 2.32E-05 | hypomethylated |



|            |         |             |           |          |                |
|------------|---------|-------------|-----------|----------|----------------|
| cg14497545 | 0.58838 | 0.446017838 | -0.399647 | 7.47E-05 | hypomethylated |
| cg12798338 | 0.61197 | 0.463875135 | -0.399724 | 0.002409 | hypomethylated |
| cg11457534 | 0.70189 | 0.532020541 | -0.399763 | 7.52E-06 | hypomethylated |
| cg01643090 | 0.78757 | 0.596954595 | -0.399787 | 4.01E-06 | hypomethylated |
| cg12183875 | 0.87979 | 0.666839459 | -0.39982  | 1.31E-05 | hypomethylated |
| cg13777668 | 0.74531 | 0.564904324 | -0.399834 | 2.51E-05 | hypomethylated |
| cg02936493 | 0.91717 | 0.695142703 | -0.39988  | 1.04E-05 | hypomethylated |
| cg03234557 | 0.81136 | 0.614914595 | -0.399956 | 0.000563 | hypomethylated |
| cg14724298 | 0.8119  | 0.615281622 | -0.400055 | 0.000126 | hypomethylated |
| cg24032156 | 0.52985 | 0.401535676 | -0.400056 | 2.21E-05 | hypomethylated |
| cg01617018 | 0.67217 | 0.509385946 | -0.400067 | 0.00054  | hypomethylated |
| cg16971128 | 0.73016 | 0.553304865 | -0.400138 | 0.000274 | hypomethylated |
| cg01289421 | 0.76021 | 0.576075676 | -0.40014  | 8.63E-05 | hypomethylated |
| cg06807993 | 0.88709 | 0.672218378 | -0.40015  | 6.95E-05 | hypomethylated |
| cg05445326 | 0.88719 | 0.672224865 | -0.400299 | 3.27E-05 | hypomethylated |
| cg01242196 | 0.64507 | 0.488768649 | -0.400304 | 2.02E-05 | hypomethylated |
| cg15422147 | 0.76656 | 0.580817838 | -0.400313 | 2.27E-05 | hypomethylated |
| cg26853415 | 0.69672 | 0.527878919 | -0.400372 | 0.000111 | hypomethylated |
| cg02703235 | 0.71878 | 0.544583784 | -0.400396 | 0.00017  | hypomethylated |
| cg00864293 | 0.6447  | 0.488448649 | -0.400421 | 0.00097  | hypomethylated |
| cg12658400 | 0.89042 | 0.674588649 | -0.400478 | 6.05E-06 | hypomethylated |
| cg23746050 | 0.79127 | 0.599461081 | -0.400504 | 0.000112 | hypomethylated |
| cg19397176 | 0.80205 | 0.607618919 | -0.400525 | 3.95E-05 | hypomethylated |
| cg25535982 | 0.74346 | 0.563214054 | -0.400572 | 0.001511 | hypomethylated |
| cg25193885 | 0.80143 | 0.60712     | -0.400595 | 1.28E-05 | hypomethylated |
| cg04138756 | 0.75091 | 0.568847027 | -0.400599 | 3.32E-05 | hypomethylated |
| cg21368566 | 0.80274 | 0.608094595 | -0.400637 | 0.000112 | hypomethylated |
| cg15043318 | 0.55286 | 0.418788108 | -0.400694 | 0.000107 | hypomethylated |
| cg13491563 | 0.74158 | 0.561696757 | -0.400811 | 0.000112 | hypomethylated |
| cg01046798 | 0.6511  | 0.493151892 | -0.400847 | 0.000117 | hypomethylated |
| cg14894245 | 0.75745 | 0.573691892 | -0.400875 | 1.02E-05 | hypomethylated |
| cg00024046 | 0.83419 | 0.631794595 | -0.40092  | 1.46E-05 | hypomethylated |
| cg04058799 | 0.7731  | 0.585519459 | -0.400938 | 0.000132 | hypomethylated |
| cg01400671 | 0.71847 | 0.544118919 | -0.401006 | 0.003571 | hypomethylated |
| cg17396305 | 0.50628 | 0.383416216 | -0.401024 | 6.95E-05 | hypomethylated |
| cg24189917 | 0.84014 | 0.636236757 | -0.401066 | 2.51E-05 | hypomethylated |
| cg23418201 | 0.88335 | 0.668937297 | -0.401114 | 9.31E-06 | hypomethylated |
| cg02558132 | 0.70325 | 0.532520541 | -0.4012   | 2.85E-05 | hypomethylated |
| cg09099500 | 0.78298 | 0.592868649 | -0.401263 | 5.19E-05 | hypomethylated |
| cg24854861 | 0.90059 | 0.681916757 | -0.401275 | 3.79E-06 | hypomethylated |
| cg03312427 | 0.61047 | 0.462241081 | -0.401275 | 1.82E-05 | hypomethylated |
| cg21856334 | 0.96621 | 0.731598378 | -0.401285 | 1.49E-06 | hypomethylated |
| cg12357606 | 0.74203 | 0.56182973  | -0.401345 | 0.000342 | hypomethylated |
| cg18767278 | 0.71928 | 0.544601622 | -0.401352 | 0.000163 | hypomethylated |
| cg09024962 | 0.92077 | 0.697125405 | -0.401423 | 2.36E-06 | hypomethylated |
| cg26162295 | 0.55498 | 0.420172973 | -0.401452 | 5.14E-06 | hypomethylated |
| cg04302618 | 0.9258  | 0.700890811 | -0.401511 | 1.12E-06 | hypomethylated |
| cg11966998 | 0.71362 | 0.540235135 | -0.401569 | 0.000805 | hypomethylated |
| cg06358191 | 0.84438 | 0.639193514 | -0.40164  | 5.65E-06 | hypomethylated |
| cg09999348 | 0.70275 | 0.531968108 | -0.401672 | 0.00018  | hypomethylated |
| cg23551720 | 0.75517 | 0.571643784 | -0.401685 | 0.000495 | hypomethylated |
| cg15925478 | 0.749   | 0.566961622 | -0.401715 | 0.004567 | hypomethylated |
| cg00190795 | 0.73648 | 0.55746973  | -0.401753 | 2.78E-05 | hypomethylated |
| cg14603605 | 0.84923 | 0.642797838 | -0.40179  | 1.28E-05 | hypomethylated |
| cg06236559 | 0.68414 | 0.517831351 | -0.401809 | 0.004172 | hypomethylated |
| cg03049846 | 0.66371 | 0.502327568 | -0.401925 | 7.93E-05 | hypomethylated |
| cg02985293 | 0.72388 | 0.547845946 | -0.40198  | 1.84E-05 | hypomethylated |
| cg19747745 | 0.7402  | 0.560187568 | -0.402005 | 2.39E-05 | hypomethylated |

|            |         |             |           |          |                |
|------------|---------|-------------|-----------|----------|----------------|
| cg06889086 | 0.769   | 0.581962162 | -0.402058 | 0.000588 | hypomethylated |
| cg04918770 | 0.82338 | 0.623087027 | -0.402125 | 7.12E-05 | hypomethylated |
| cg27049094 | 0.87024 | 0.658518919 | -0.402188 | 4.94E-05 | hypomethylated |
| cg24461242 | 0.84103 | 0.636392432 | -0.402241 | 5.89E-06 | hypomethylated |
| cg23120541 | 0.66208 | 0.500977297 | -0.40226  | 0.000365 | hypomethylated |
| cg09512406 | 0.7806  | 0.590616216 | -0.402362 | 3.69E-06 | hypomethylated |
| cg01808708 | 0.88262 | 0.667803784 | -0.402368 | 2.29E-06 | hypomethylated |
| cg18393172 | 0.53667 | 0.406043784 | -0.4024   | 9.69E-06 | hypomethylated |
| cg01149264 | 0.82775 | 0.626268649 | -0.402413 | 0.000112 | hypomethylated |
| cg11185991 | 0.82381 | 0.623265946 | -0.402464 | 0.000115 | hypomethylated |
| cg16999568 | 0.54122 | 0.409467027 | -0.402468 | 3.57E-05 | hypomethylated |
| cg00656881 | 0.54266 | 0.410545405 | -0.402507 | 0.000104 | hypomethylated |
| cg24736734 | 0.68061 | 0.514896757 | -0.402545 | 0.002106 | hypomethylated |
| cg17730764 | 0.86377 | 0.653392973 | -0.402696 | 2.39E-05 | hypomethylated |
| cg20201177 | 0.81695 | 0.617910811 | -0.402849 | 1.66E-05 | hypomethylated |
| cg14204619 | 0.95538 | 0.722614054 | -0.402849 | 1.04E-05 | hypomethylated |
| cg23732725 | 0.92895 | 0.702579459 | -0.40294  | 6.22E-06 | hypomethylated |
| cg09853936 | 0.67779 | 0.512614054 | -0.402965 | 0.000358 | hypomethylated |
| cg25471639 | 0.60733 | 0.459322162 | -0.402974 | 0.000517 | hypomethylated |
| cg00175150 | 0.80178 | 0.60637027  | -0.403007 | 2.30E-05 | hypomethylated |
| cg08049614 | 0.77717 | 0.587751892 | -0.403023 | 2.10E-05 | hypomethylated |
| cg25362050 | 0.57616 | 0.435690811 | -0.403165 | 1.99E-05 | hypomethylated |
| cg17457701 | 0.76019 | 0.574834054 | -0.403215 | 9.31E-06 | hypomethylated |
| cg14826683 | 0.86949 | 0.657475135 | -0.403233 | 1.09E-05 | hypomethylated |
| cg10755077 | 0.57709 | 0.436361622 | -0.403272 | 0.000138 | hypomethylated |
| cg07699300 | 0.51557 | 0.389822162 | -0.403352 | 9.95E-05 | hypomethylated |
| cg08670715 | 0.72599 | 0.548894054 | -0.403422 | 5.19E-05 | hypomethylated |
| cg25202407 | 0.83803 | 0.633603243 | -0.403422 | 1.84E-05 | hypomethylated |
| cg05214511 | 0.86196 | 0.65169027  | -0.403434 | 1.08E-05 | hypomethylated |
| cg11912215 | 0.54626 | 0.412979459 | -0.403518 | 9.82E-06 | hypomethylated |
| cg26923862 | 0.96626 | 0.730484324 | -0.403558 | 7.72E-06 | hypomethylated |
| cg10085326 | 0.82768 | 0.625699459 | -0.403603 | 1.71E-05 | hypomethylated |
| cg23599820 | 0.65593 | 0.495842162 | -0.403661 | 0.001395 | hypomethylated |
| cg22762189 | 0.82452 | 0.623275135 | -0.403685 | 1.23E-05 | hypomethylated |
| cg14037769 | 0.66995 | 0.506423243 | -0.40371  | 5.38E-05 | hypomethylated |
| cg25343661 | 0.664   | 0.501908108 | -0.40376  | 0.000256 | hypomethylated |
| cg12535109 | 0.8643  | 0.65330973  | -0.403765 | 8.03E-05 | hypomethylated |
| cg11580028 | 0.76541 | 0.578554595 | -0.40378  | 1.31E-05 | hypomethylated |
| cg12656272 | 0.63993 | 0.483687568 | -0.403839 | 0.004863 | hypomethylated |
| cg20154206 | 0.53698 | 0.405860541 | -0.403884 | 6.31E-05 | hypomethylated |
| cg15225810 | 0.64828 | 0.489970811 | -0.403921 | 2.32E-05 | hypomethylated |
| cg18565216 | 0.44795 | 0.338561081 | -0.403922 | 0.002965 | hypomethylated |
| cg12692386 | 0.72374 | 0.546939459 | -0.40409  | 3.39E-06 | hypomethylated |
| cg18892446 | 0.86979 | 0.657271351 | -0.404178 | 5.43E-06 | hypomethylated |
| cg23813681 | 0.78757 | 0.595107568 | -0.404258 | 0.000104 | hypomethylated |
| cg08720806 | 0.64929 | 0.490617297 | -0.404265 | 0.001368 | hypomethylated |
| cg10071493 | 0.71582 | 0.54088     | -0.404288 | 5.72E-05 | hypomethylated |
| cg26611070 | 0.91964 | 0.694874054 | -0.404318 | 1.80E-06 | hypomethylated |
| cg26493188 | 0.63727 | 0.481516757 | -0.404319 | 9.31E-06 | hypomethylated |
| cg08548559 | 0.61922 | 0.467848649 | -0.40441  | 0.007536 | hypomethylated |
| cg06139893 | 0.73284 | 0.553667568 | -0.404478 | 1.46E-05 | hypomethylated |
| cg02465859 | 0.85297 | 0.644416757 | -0.404501 | 6.14E-06 | hypomethylated |
| cg18567041 | 0.70793 | 0.534835135 | -0.404512 | 0.000219 | hypomethylated |
| cg11839681 | 0.71746 | 0.542024865 | -0.404539 | 9.49E-05 | hypomethylated |
| cg02696798 | 0.70109 | 0.529632432 | -0.404608 | 0.0006   | hypomethylated |
| cg02216951 | 0.8085  | 0.610757297 | -0.404649 | 4.48E-06 | hypomethylated |
| cg21157065 | 0.72694 | 0.549139459 | -0.404664 | 0.00012  | hypomethylated |
| cg24036039 | 0.76676 | 0.579215135 | -0.404676 | 3.76E-05 | hypomethylated |

|            |         |             |           |          |                |
|------------|---------|-------------|-----------|----------|----------------|
| cg00677272 | 0.66261 | 0.500523243 | -0.404723 | 0.000764 | hypomethylated |
| cg13785779 | 0.74555 | 0.563141622 | -0.404807 | 1.58E-05 | hypomethylated |
| cg08977790 | 0.78585 | 0.593554054 | -0.404875 | 9.49E-05 | hypomethylated |
| cg06103086 | 0.70641 | 0.533508649 | -0.404994 | 0.000667 | hypomethylated |
| cg04848686 | 0.77242 | 0.583352973 | -0.405016 | 6.46E-05 | hypomethylated |
| cg18957070 | 0.83169 | 0.628108649 | -0.405032 | 3.57E-05 | hypomethylated |
| cg18037826 | 0.79769 | 0.602428649 | -0.405038 | 0.000145 | hypomethylated |
| cg22469870 | 0.90926 | 0.686685946 | -0.405042 | 2.05E-06 | hypomethylated |
| cg07776049 | 0.6496  | 0.490559459 | -0.405124 | 0.000399 | hypomethylated |
| cg14752965 | 0.76239 | 0.575734054 | -0.405127 | 6.86E-05 | hypomethylated |
| cg10057904 | 0.65855 | 0.497293514 | -0.405195 | 0.000123 | hypomethylated |
| cg24339704 | 0.80843 | 0.610456757 | -0.405234 | 4.26E-05 | hypomethylated |
| cg13690407 | 0.76631 | 0.578620541 | -0.405311 | 0.000726 | hypomethylated |
| cg03321553 | 0.69491 | 0.524678919 | -0.405391 | 0.000256 | hypomethylated |
| cg16603012 | 0.79761 | 0.602201622 | -0.405437 | 0.000178 | hypomethylated |
| cg02646779 | 0.75039 | 0.566543243 | -0.405455 | 3.15E-05 | hypomethylated |
| cg01090482 | 0.56874 | 0.429331351 | -0.405678 | 0.001768 | hypomethylated |
| cg17384323 | 0.77106 | 0.582055135 | -0.405687 | 0.00012  | hypomethylated |
| cg22054793 | 0.86255 | 0.651098919 | -0.405731 | 8.26E-06 | hypomethylated |
| cg00273863 | 0.60227 | 0.454620541 | -0.405748 | 2.10E-05 | hypomethylated |
| cg01378158 | 0.68759 | 0.518994054 | -0.405831 | 0.000102 | hypomethylated |
| cg05055844 | 0.73793 | 0.556978919 | -0.405861 | 0.000119 | hypomethylated |
| cg21138405 | 0.65177 | 0.491942703 | -0.405873 | 0.001052 | hypomethylated |
| cg16072754 | 0.62671 | 0.473016216 | -0.405908 | 0.000185 | hypomethylated |
| cg14852276 | 0.88169 | 0.665458378 | -0.405923 | 1.84E-05 | hypomethylated |
| cg06058576 | 0.88253 | 0.666074054 | -0.405963 | 6.86E-05 | hypomethylated |
| cg25875163 | 0.79074 | 0.596755676 | -0.406063 | 1.66E-05 | hypomethylated |
| cg01883662 | 0.74007 | 0.558512973 | -0.406071 | 0.000132 | hypomethylated |
| cg07820280 | 0.87531 | 0.660545946 | -0.406135 | 1.54E-06 | hypomethylated |
| cg17893669 | 0.75921 | 0.572931351 | -0.406137 | 5.31E-05 | hypomethylated |
| cg13646480 | 0.57695 | 0.435388108 | -0.406144 | 2.67E-05 | hypomethylated |
| cg13505608 | 0.76886 | 0.580195676 | -0.406181 | 1.28E-05 | hypomethylated |
| cg07800544 | 0.79083 | 0.596764324 | -0.406206 | 0.000209 | hypomethylated |
| cg21511203 | 0.92843 | 0.700595135 | -0.406212 | 1.63E-06 | hypomethylated |
| cg24704396 | 0.91273 | 0.688722162 | -0.406266 | 8.03E-05 | hypomethylated |
| cg11215644 | 0.44451 | 0.33539027  | -0.406375 | 0.000245 | hypomethylated |
| cg25098793 | 0.75136 | 0.566907568 | -0.406391 | 0.000132 | hypomethylated |
| cg19371339 | 0.7171  | 0.541043243 | -0.40643  | 6.08E-05 | hypomethylated |
| cg21423741 | 0.86436 | 0.652126486 | -0.40648  | 1.93E-06 | hypomethylated |
| cg15002761 | 0.95342 | 0.719280541 | -0.406557 | 3.04E-05 | hypomethylated |
| cg01762581 | 0.60131 | 0.453636216 | -0.406573 | 0.000216 | hypomethylated |
| cg27221631 | 0.88846 | 0.670218378 | -0.406676 | 2.51E-05 | hypomethylated |
| cg12587087 | 0.7104  | 0.535878378 | -0.406726 | 0.00032  | hypomethylated |
| cg02325250 | 0.47408 | 0.357612432 | -0.406734 | 0.000115 | hypomethylated |
| cg06737981 | 0.55443 | 0.41821027  | -0.406777 | 0.001541 | hypomethylated |
| cg21735384 | 0.82073 | 0.619044865 | -0.406864 | 1.72E-06 | hypomethylated |
| cg13882345 | 0.69722 | 0.525883784 | -0.40687  | 2.79E-06 | hypomethylated |
| cg06892907 | 0.6873  | 0.51838973  | -0.406903 | 0.001409 | hypomethylated |
| cg12559827 | 0.75819 | 0.571854595 | -0.406911 | 0.000157 | hypomethylated |
| cg01165355 | 0.70539 | 0.532018919 | -0.406944 | 0.000166 | hypomethylated |
| cg24924505 | 0.53729 | 0.405231892 | -0.406953 | 4.70E-05 | hypomethylated |
| cg26703511 | 0.80949 | 0.610484324 | -0.407059 | 5.45E-05 | hypomethylated |
| cg07953935 | 0.59867 | 0.451444865 | -0.407211 | 0.000293 | hypomethylated |
| cg20250250 | 0.71624 | 0.540094054 | -0.407232 | 0.000159 | hypomethylated |
| cg19807685 | 0.58858 | 0.443823784 | -0.407252 | 0.000207 | hypomethylated |
| cg15388107 | 0.72125 | 0.543846486 | -0.4073   | 8.84E-05 | hypomethylated |
| cg18024358 | 0.71978 | 0.542734595 | -0.407309 | 3.00E-05 | hypomethylated |
| cg02638567 | 0.8135  | 0.613361622 | -0.407404 | 0.000178 | hypomethylated |

|            |         |             |           |          |                |
|------------|---------|-------------|-----------|----------|----------------|
| cg20376082 | 0.87317 | 0.658332973 | -0.407445 | 3.15E-05 | hypomethylated |
| cg07803218 | 0.83684 | 0.630920541 | -0.407493 | 0.000107 | hypomethylated |
| cg01727625 | 0.50663 | 0.381963784 | -0.407497 | 5.72E-05 | hypomethylated |
| cg15163151 | 0.78702 | 0.593357297 | -0.407499 | 0.0002   | hypomethylated |
| cg00386586 | 0.91075 | 0.686620541 | -0.407542 | 3.96E-06 | hypomethylated |
| cg24707200 | 0.53826 | 0.405779459 | -0.407607 | 0.000152 | hypomethylated |
| cg16037981 | 0.73626 | 0.555034595 | -0.407638 | 0.001526 | hypomethylated |
| cg10276016 | 0.77502 | 0.584237297 | -0.407679 | 5.32E-05 | hypomethylated |
| cg18176482 | 0.64982 | 0.489792973 | -0.407868 | 0.000506 | hypomethylated |
| cg14489794 | 0.56635 | 0.426871892 | -0.407891 | 6.15E-05 | hypomethylated |
| cg17756730 | 0.66428 | 0.500683784 | -0.407892 | 0.000726 | hypomethylated |
| cg14095048 | 0.56929 | 0.429064865 | -0.407968 | 0.000204 | hypomethylated |
| cg24480515 | 0.86631 | 0.652923243 | -0.40797  | 1.05E-05 | hypomethylated |
| cg23014759 | 0.81456 | 0.613898378 | -0.408021 | 9.49E-05 | hypomethylated |
| cg26936219 | 0.6883  | 0.518734054 | -0.408042 | 0.001164 | hypomethylated |
| cg06366345 | 0.87396 | 0.658644324 | -0.408068 | 1.99E-05 | hypomethylated |
| cg01811583 | 0.59218 | 0.446276216 | -0.408099 | 6.15E-05 | hypomethylated |
| cg12127811 | 0.69194 | 0.521454595 | -0.408105 | 0.00064  | hypomethylated |
| cg20731121 | 0.76256 | 0.574667027 | -0.408125 | 0.000253 | hypomethylated |
| cg23295636 | 0.79519 | 0.599237297 | -0.408172 | 1.04E-05 | hypomethylated |
| cg00295259 | 0.80003 | 0.602874054 | -0.408197 | 2.78E-05 | hypomethylated |
| cg01165442 | 0.84237 | 0.634762703 | -0.408237 | 0.000107 | hypomethylated |
| cg08974852 | 0.77939 | 0.58729027  | -0.408272 | 1.06E-05 | hypomethylated |
| cg13211559 | 0.84814 | 0.63904973  | -0.408374 | 3.07E-05 | hypomethylated |
| cg10251594 | 0.70461 | 0.530866486 | -0.408476 | 0.000155 | hypomethylated |
| cg14861497 | 0.82965 | 0.625071892 | -0.408481 | 1.01E-05 | hypomethylated |
| cg20170777 | 0.68533 | 0.516333514 | -0.408496 | 1.44E-05 | hypomethylated |
| cg19245120 | 0.83464 | 0.628746486 | -0.408676 | 2.57E-05 | hypomethylated |
| cg20401945 | 0.47161 | 0.355266486 | -0.408693 | 0.000155 | hypomethylated |
| cg23088126 | 0.78644 | 0.592402703 | -0.408758 | 0.000191 | hypomethylated |
| cg22243298 | 0.85646 | 0.645138919 | -0.408776 | 0.000274 | hypomethylated |
| cg19458497 | 0.59298 | 0.446666486 | -0.408785 | 1.46E-05 | hypomethylated |
| cg26548834 | 0.81584 | 0.614528108 | -0.408807 | 0.000331 | hypomethylated |
| cg22160267 | 0.4989  | 0.375792432 | -0.408815 | 0.001212 | hypomethylated |
| cg07169637 | 0.76281 | 0.574571892 | -0.408836 | 7.72E-06 | hypomethylated |
| cg11898431 | 0.65911 | 0.496448108 | -0.408876 | 0.002026 | hypomethylated |
| cg09915232 | 0.66525 | 0.501066486 | -0.408895 | 0.0002   | hypomethylated |
| cg04585669 | 0.78257 | 0.589402162 | -0.408967 | 5.45E-05 | hypomethylated |
| cg07306604 | 0.76374 | 0.575217838 | -0.408973 | 2.26E-06 | hypomethylated |
| cg00736681 | 0.85316 | 0.642551351 | -0.409005 | 8.22E-05 | hypomethylated |
| cg17126924 | 0.85544 | 0.644241622 | -0.409065 | 0.000126 | hypomethylated |
| cg24024661 | 0.6823  | 0.513832432 | -0.409108 | 0.001541 | hypomethylated |
| cg23699463 | 0.74909 | 0.564125946 | -0.409122 | 0.000245 | hypomethylated |
| cg09408902 | 0.59898 | 0.451071351 | -0.409152 | 2.02E-05 | hypomethylated |
| cg19030994 | 0.87662 | 0.660134054 | -0.409193 | 1.84E-05 | hypomethylated |
| cg08767838 | 0.87367 | 0.657862162 | -0.409303 | 0.000202 | hypomethylated |
| cg23419907 | 0.61083 | 0.459933514 | -0.409346 | 6.15E-05 | hypomethylated |
| cg16708938 | 0.54528 | 0.410574054 | -0.409355 | 8.42E-05 | hypomethylated |
| cg13004635 | 0.71059 | 0.535016216 | -0.409435 | 2.78E-05 | hypomethylated |
| cg09202851 | 0.63639 | 0.47912973  | -0.409495 | 0.000245 | hypomethylated |
| cg21193888 | 0.78268 | 0.589261081 | -0.409516 | 0.000176 | hypomethylated |
| cg23980760 | 0.7478  | 0.562981081 | -0.409566 | 8.37E-06 | hypomethylated |
| cg03719555 | 0.79031 | 0.594957838 | -0.409631 | 6.95E-05 | hypomethylated |
| cg04849850 | 0.66006 | 0.496863784 | -0.409747 | 0.000221 | hypomethylated |
| cg14212447 | 0.55651 | 0.418907568 | -0.409776 | 0.000262 | hypomethylated |
| cg10505902 | 0.83234 | 0.626526486 | -0.409797 | 0.000191 | hypomethylated |
| cg08248751 | 0.61493 | 0.462806486 | -0.410013 | 1.89E-05 | hypomethylated |
| cg03669698 | 0.76248 | 0.573818919 | -0.410104 | 0.000365 | hypomethylated |

|            |         |             |           |          |                |
|------------|---------|-------------|-----------|----------|----------------|
| cg03372205 | 0.7724  | 0.581282162 | -0.41011  | 3.76E-05 | hypomethylated |
| cg24074594 | 0.8177  | 0.615308108 | -0.410263 | 0.000126 | hypomethylated |
| cg26219843 | 0.80652 | 0.606889189 | -0.410277 | 1.18E-05 | hypomethylated |
| cg01034754 | 0.84611 | 0.636679459 | -0.410278 | 5.32E-05 | hypomethylated |
| cg01722566 | 0.7752  | 0.583317297 | -0.410288 | 7.83E-06 | hypomethylated |
| cg18693051 | 0.74403 | 0.55981027  | -0.410423 | 0.000163 | hypomethylated |
| cg26553501 | 0.61767 | 0.464704865 | -0.410522 | 0.000667 | hypomethylated |
| cg06987292 | 0.82164 | 0.618128108 | -0.410601 | 1.12E-05 | hypomethylated |
| cg04457794 | 0.70364 | 0.529354054 | -0.410605 | 2.10E-05 | hypomethylated |
| cg10986946 | 0.47633 | 0.358336757 | -0.410645 | 0.0002   | hypomethylated |
| cg26488978 | 0.69372 | 0.52186973  | -0.410664 | 0.000696 | hypomethylated |
| cg04662594 | 0.53175 | 0.400016216 | -0.41069  | 0.00017  | hypomethylated |
| cg23410129 | 0.73826 | 0.555344324 | -0.410746 | 4.47E-05 | hypomethylated |
| cg18780489 | 0.67827 | 0.510202162 | -0.410791 | 0.00039  | hypomethylated |
| cg02165670 | 0.8051  | 0.605591892 | -0.410822 | 0.000449 | hypomethylated |
| cg03044344 | 0.58855 | 0.442696216 | -0.410848 | 1.25E-05 | hypomethylated |
| cg12764314 | 0.68127 | 0.512401622 | -0.410952 | 1.99E-05 | hypomethylated |
| cg18552520 | 0.77669 | 0.584117297 | -0.411081 | 4.12E-06 | hypomethylated |
| cg06968788 | 0.84647 | 0.636554595 | -0.411175 | 2.21E-05 | hypomethylated |
| cg09728393 | 0.80499 | 0.605347027 | -0.411208 | 5.45E-05 | hypomethylated |
| cg15252509 | 0.80382 | 0.604411351 | -0.411342 | 9.44E-06 | hypomethylated |
| cg11673687 | 0.78079 | 0.587071892 | -0.411397 | 1.89E-05 | hypomethylated |
| cg05250241 | 0.94362 | 0.709482703 | -0.411438 | 1.46E-05 | hypomethylated |
| cg04270264 | 0.84036 | 0.631841622 | -0.411445 | 6.05E-06 | hypomethylated |
| cg18208602 | 0.81379 | 0.611863243 | -0.411447 | 0.000189 | hypomethylated |
| cg19103704 | 0.4921  | 0.369972973 | -0.411532 | 0.000449 | hypomethylated |
| cg03398156 | 0.68111 | 0.512065405 | -0.41156  | 4.47E-05 | hypomethylated |
| cg01356872 | 0.84066 | 0.632008649 | -0.411578 | 0.000135 | hypomethylated |
| cg13576290 | 0.62096 | 0.466804865 | -0.411681 | 0.000756 | hypomethylated |
| cg00425213 | 0.70424 | 0.529408108 | -0.411687 | 0.000287 | hypomethylated |
| cg12551957 | 0.71199 | 0.535204865 | -0.411766 | 9.95E-05 | hypomethylated |
| cg21565415 | 0.7285  | 0.547611351 | -0.411777 | 0.000317 | hypomethylated |
| cg14121772 | 0.78746 | 0.591913514 | -0.41182  | 3.39E-06 | hypomethylated |
| cg05208178 | 0.51768 | 0.389125405 | -0.411825 | 0.002993 | hypomethylated |
| cg11147309 | 0.6876  | 0.516842703 | -0.411844 | 8.83E-06 | hypomethylated |
| cg18118198 | 0.79461 | 0.597264865 | -0.411876 | 5.43E-06 | hypomethylated |
| cg10828561 | 0.60885 | 0.457637297 | -0.411882 | 1.62E-05 | hypomethylated |
| cg27507254 | 0.78635 | 0.59102973  | -0.411941 | 4.47E-05 | hypomethylated |
| cg09033641 | 0.56514 | 0.424734054 | -0.412049 | 9.95E-05 | hypomethylated |
| cg21484834 | 0.72053 | 0.541498919 | -0.4121   | 3.15E-05 | hypomethylated |
| cg06601993 | 0.79121 | 0.59460973  | -0.412118 | 0.000331 | hypomethylated |
| cg25948982 | 0.45854 | 0.3446      | -0.412125 | 0.000207 | hypomethylated |
| cg05846044 | 0.86766 | 0.652056757 | -0.412132 | 1.31E-05 | hypomethylated |
| cg19251656 | 0.62958 | 0.473123243 | -0.412174 | 1.58E-05 | hypomethylated |
| cg18166959 | 0.69302 | 0.520764865 | -0.412265 | 0.000626 | hypomethylated |
| cg06082883 | 0.61576 | 0.462677838 | -0.41236  | 0.000805 | hypomethylated |
| cg08660562 | 0.8767  | 0.658742162 | -0.412369 | 1.35E-05 | hypomethylated |
| cg14766231 | 0.74544 | 0.560108108 | -0.412387 | 0.000563 | hypomethylated |
| cg09169014 | 0.78984 | 0.593468649 | -0.412389 | 9.44E-06 | hypomethylated |
| cg10880599 | 0.79431 | 0.596816216 | -0.412415 | 0.000454 | hypomethylated |
| cg18880986 | 0.80864 | 0.607565946 | -0.412457 | 2.21E-05 | hypomethylated |
| cg07181257 | 0.79956 | 0.600737838 | -0.412471 | 1.42E-05 | hypomethylated |
| cg23526087 | 0.60027 | 0.450994595 | -0.412501 | 0.000342 | hypomethylated |
| cg14069214 | 0.78332 | 0.588500541 | -0.412558 | 0.000253 | hypomethylated |
| cg26591162 | 0.8194  | 0.615572973 | -0.412638 | 1.09E-05 | hypomethylated |
| cg07028950 | 0.58633 | 0.44046     | -0.412702 | 0.00028  | hypomethylated |
| cg19795866 | 0.85136 | 0.639515676 | -0.41279  | 8.83E-06 | hypomethylated |
| cg16870215 | 0.58953 | 0.442831892 | -0.412806 | 1.58E-05 | hypomethylated |

|            |         |             |           |          |                |
|------------|---------|-------------|-----------|----------|----------------|
| cg16354802 | 0.66583 | 0.500106486 | -0.412919 | 0.000117 | hypomethylated |
| cg07918814 | 0.92114 | 0.69186     | -0.41294  | 3.69E-06 | hypomethylated |
| cg26552650 | 0.79639 | 0.59812     | -0.41304  | 0.000382 | hypomethylated |
| cg18473733 | 0.57656 | 0.433013514 | -0.413059 | 0.001141 | hypomethylated |
| cg04421974 | 0.9271  | 0.696270811 | -0.413076 | 3.85E-05 | hypomethylated |
| cg01747591 | 0.81214 | 0.609925405 | -0.413096 | 1.40E-05 | hypomethylated |
| cg19928195 | 0.75926 | 0.570205405 | -0.413112 | 7.84E-05 | hypomethylated |
| cg17612535 | 0.55551 | 0.417187027 | -0.413119 | 0.00012  | hypomethylated |
| cg15010903 | 0.90535 | 0.679897838 | -0.413158 | 4.42E-06 | hypomethylated |
| cg03038262 | 0.53557 | 0.402156757 | -0.413317 | 0.001803 | hypomethylated |
| cg12404590 | 0.6417  | 0.481849189 | -0.413317 | 0.000237 | hypomethylated |
| cg11074968 | 0.73894 | 0.554831892 | -0.413407 | 5.86E-05 | hypomethylated |
| cg08670693 | 0.81889 | 0.614842162 | -0.413454 | 0.000155 | hypomethylated |
| cg19798881 | 0.83704 | 0.628398378 | -0.413617 | 0.000107 | hypomethylated |
| cg19055098 | 0.88892 | 0.667336216 | -0.41364  | 3.44E-06 | hypomethylated |
| cg13420075 | 0.59112 | 0.443755676 | -0.413685 | 0.000417 | hypomethylated |
| cg11075561 | 0.70561 | 0.529695676 | -0.413707 | 0.000306 | hypomethylated |
| cg10230591 | 0.70463 | 0.528938919 | -0.413765 | 8.42E-05 | hypomethylated |
| cg04983349 | 0.6843  | 0.513672432 | -0.41378  | 0.000805 | hypomethylated |
| cg27511289 | 0.87888 | 0.659703243 | -0.413849 | 2.10E-05 | hypomethylated |
| cg21553700 | 0.95087 | 0.713736757 | -0.413856 | 3.04E-05 | hypomethylated |
| cg02577580 | 0.68029 | 0.510632973 | -0.413863 | 3.85E-05 | hypomethylated |
| cg19551485 | 0.79002 | 0.592980541 | -0.413904 | 0.00012  | hypomethylated |
| cg14227911 | 0.73716 | 0.553298378 | -0.41392  | 6.62E-05 | hypomethylated |
| cg09780964 | 0.75006 | 0.562972973 | -0.41394  | 1.75E-05 | hypomethylated |
| cg02106180 | 0.87962 | 0.660201081 | -0.413975 | 5.19E-05 | hypomethylated |
| cg04756252 | 0.79213 | 0.594532973 | -0.41398  | 4.58E-05 | hypomethylated |
| cg24112628 | 0.8217  | 0.616721622 | -0.413992 | 0.000242 | hypomethylated |
| cg22621734 | 0.49764 | 0.373454595 | -0.41417  | 0.000324 | hypomethylated |
| cg22109795 | 0.67497 | 0.506521622 | -0.4142   | 0.000195 | hypomethylated |
| cg26357344 | 0.74623 | 0.559968108 | -0.414276 | 0.000115 | hypomethylated |
| cg20788021 | 0.72846 | 0.54663027  | -0.414284 | 3.07E-05 | hypomethylated |
| cg12277870 | 0.87375 | 0.655628108 | -0.414343 | 8.04E-06 | hypomethylated |
| cg06431514 | 0.78258 | 0.587177838 | -0.414441 | 0.000163 | hypomethylated |
| cg22749051 | 0.9579  | 0.718711351 | -0.414463 | 2.78E-05 | hypomethylated |
| cg25461389 | 0.4504  | 0.337930811 | -0.414479 | 0.000176 | hypomethylated |
| cg08770935 | 0.59769 | 0.448398378 | -0.414616 | 8.84E-05 | hypomethylated |
| cg23348723 | 0.66943 | 0.502178378 | -0.414733 | 0.0003   | hypomethylated |
| cg04104789 | 0.53844 | 0.403913514 | -0.414739 | 0.000563 | hypomethylated |
| cg12211091 | 0.84432 | 0.63336     | -0.414764 | 7.65E-05 | hypomethylated |
| cg01981417 | 0.6978  | 0.523436757 | -0.414798 | 8.22E-05 | hypomethylated |
| cg01929744 | 0.66621 | 0.499735135 | -0.414813 | 7.41E-06 | hypomethylated |
| cg17574812 | 0.75624 | 0.567252432 | -0.414853 | 0.000667 | hypomethylated |
| cg22716262 | 0.7909  | 0.59324973  | -0.414856 | 0.000523 | hypomethylated |
| cg03918703 | 0.6864  | 0.514862703 | -0.414862 | 1.94E-05 | hypomethylated |
| cg21733794 | 0.72064 | 0.540524865 | -0.414918 | 1.80E-05 | hypomethylated |
| cg22354175 | 0.72519 | 0.543936757 | -0.41492  | 0.00066  | hypomethylated |
| cg00033304 | 0.82965 | 0.622278378 | -0.414943 | 1.40E-05 | hypomethylated |
| cg22838050 | 0.60935 | 0.457019459 | -0.415016 | 0.005316 | hypomethylated |
| cg11692307 | 0.90495 | 0.67872     | -0.415022 | 3.67E-05 | hypomethylated |
| cg26334888 | 0.71552 | 0.536614595 | -0.415106 | 3.23E-05 | hypomethylated |
| cg22188603 | 0.87135 | 0.653466486 | -0.415139 | 2.71E-06 | hypomethylated |
| cg06366107 | 0.49611 | 0.372037838 | -0.415211 | 0.004365 | hypomethylated |
| cg19284726 | 0.82979 | 0.622242162 | -0.41527  | 0.000159 | hypomethylated |
| cg17340729 | 0.79115 | 0.593247027 | -0.415318 | 0.00035  | hypomethylated |
| cg03071245 | 0.83508 | 0.626183243 | -0.41533  | 1.68E-05 | hypomethylated |
| cg03561787 | 0.76545 | 0.573960541 | -0.415357 | 1.62E-05 | hypomethylated |
| cg07047589 | 0.56512 | 0.423743243 | -0.415367 | 0.000667 | hypomethylated |

|            |         |             |           |          |                |
|------------|---------|-------------|-----------|----------|----------------|
| cg09508556 | 0.80382 | 0.602696216 | -0.415441 | 1.41E-06 | hypomethylated |
| cg05593510 | 0.81857 | 0.613746486 | -0.415463 | 4.20E-05 | hypomethylated |
| cg08568298 | 0.77613 | 0.581915135 | -0.41549  | 2.21E-05 | hypomethylated |
| cg18572353 | 0.88801 | 0.665777838 | -0.415535 | 1.93E-06 | hypomethylated |
| cg19753609 | 0.80088 | 0.600436216 | -0.415575 | 2.61E-05 | hypomethylated |
| cg05031931 | 0.89368 | 0.669979459 | -0.415641 | 1.15E-05 | hypomethylated |
| cg17987982 | 0.71793 | 0.538212973 | -0.415666 | 0.00014  | hypomethylated |
| cg25646708 | 0.8168  | 0.612295135 | -0.415756 | 0.000613 | hypomethylated |
| cg14471996 | 0.57816 | 0.433375676 | -0.415851 | 0.000152 | hypomethylated |
| cg06775420 | 0.94161 | 0.705789189 | -0.415892 | 3.36E-05 | hypomethylated |
| cg14664412 | 0.81809 | 0.613177297 | -0.415955 | 0.000256 | hypomethylated |
| cg17920789 | 0.79747 | 0.597721081 | -0.415958 | 0.000195 | hypomethylated |
| cg05845533 | 0.85015 | 0.637132973 | -0.416123 | 7.12E-06 | hypomethylated |
| cg04003903 | 0.54115 | 0.405553514 | -0.416136 | 8.84E-05 | hypomethylated |
| cg25070253 | 0.70206 | 0.526138919 | -0.416151 | 0.000204 | hypomethylated |
| cg18503829 | 0.90946 | 0.681562703 | -0.416164 | 9.31E-06 | hypomethylated |
| cg09916692 | 0.65004 | 0.487143243 | -0.416182 | 0.000268 | hypomethylated |
| cg06376426 | 0.67404 | 0.505088649 | -0.416298 | 0.00098  | hypomethylated |
| cg08500417 | 0.86634 | 0.649172973 | -0.41633  | 5.45E-05 | hypomethylated |
| cg06599949 | 0.59511 | 0.445889189 | -0.416471 | 2.39E-05 | hypomethylated |
| cg24960291 | 0.66016 | 0.494618919 | -0.416498 | 0.000313 | hypomethylated |
| cg21404063 | 0.76539 | 0.573444324 | -0.416542 | 0.000575 | hypomethylated |
| cg09298971 | 0.7727  | 0.578874054 | -0.416659 | 1.23E-05 | hypomethylated |
| cg05220069 | 0.81194 | 0.608263243 | -0.416677 | 1.66E-05 | hypomethylated |
| cg06907626 | 0.79082 | 0.592409189 | -0.416755 | 5.58E-05 | hypomethylated |
| cg11324467 | 0.72764 | 0.545075135 | -0.41677  | 0.000111 | hypomethylated |
| cg23837282 | 0.66823 | 0.500565946 | -0.416785 | 7.52E-06 | hypomethylated |
| cg09174162 | 0.74169 | 0.555592973 | -0.416788 | 4.26E-05 | hypomethylated |
| cg00640719 | 0.67863 | 0.508341081 | -0.416828 | 3.19E-05 | hypomethylated |
| cg17811994 | 0.88003 | 0.659192973 | -0.416852 | 2.64E-05 | hypomethylated |
| cg14199384 | 0.81908 | 0.61351027  | -0.416917 | 4.73E-06 | hypomethylated |
| cg10158715 | 0.6887  | 0.515844324 | -0.41694  | 1.58E-05 | hypomethylated |
| cg18155888 | 0.88239 | 0.660893514 | -0.416999 | 1.94E-05 | hypomethylated |
| cg10670430 | 0.66862 | 0.500776216 | -0.41702  | 0.002007 | hypomethylated |
| cg21776286 | 0.72957 | 0.546415676 | -0.417048 | 0.0006   | hypomethylated |
| cg05988358 | 0.68307 | 0.511566486 | -0.417112 | 6.15E-05 | hypomethylated |
| cg18045685 | 0.74998 | 0.561663784 | -0.417145 | 0.000667 | hypomethylated |
| cg15696058 | 0.64318 | 0.481679459 | -0.417149 | 0.000511 | hypomethylated |
| cg27533454 | 0.68263 | 0.511222703 | -0.417152 | 4.58E-05 | hypomethylated |
| cg09476347 | 0.91813 | 0.687587027 | -0.417156 | 8.10E-07 | hypomethylated |
| cg13213755 | 0.879   | 0.658245405 | -0.417238 | 4.15E-05 | hypomethylated |
| cg20283771 | 0.70074 | 0.524739459 | -0.417278 | 2.71E-05 | hypomethylated |
| cg18520925 | 0.87445 | 0.654818919 | -0.41728  | 4.80E-06 | hypomethylated |
| cg09539538 | 0.62127 | 0.465226486 | -0.417287 | 0.000124 | hypomethylated |
| cg13582028 | 0.62013 | 0.464371351 | -0.417292 | 0.000219 | hypomethylated |
| cg11114141 | 0.71215 | 0.53326973  | -0.417316 | 3.15E-05 | hypomethylated |
| cg12445424 | 0.86628 | 0.64866973  | -0.417349 | 4.58E-05 | hypomethylated |
| cg21177463 | 0.7588  | 0.568172432 | -0.417391 | 9.27E-05 | hypomethylated |
| cg09215282 | 0.8153  | 0.610438378 | -0.417485 | 3.00E-05 | hypomethylated |
| cg26120813 | 0.7304  | 0.546856757 | -0.417524 | 0.000445 | hypomethylated |
| cg23586996 | 0.78188 | 0.585394595 | -0.417538 | 1.15E-05 | hypomethylated |
| cg17338816 | 0.60336 | 0.451724865 | -0.417575 | 0.008709 | hypomethylated |
| cg23451221 | 0.52562 | 0.393520541 | -0.417581 | 0.000166 | hypomethylated |
| cg17753169 | 0.81119 | 0.607320541 | -0.417582 | 4.26E-05 | hypomethylated |
| cg27032813 | 0.75429 | 0.564718378 | -0.417588 | 2.78E-05 | hypomethylated |
| cg07098502 | 0.88387 | 0.66168973  | -0.417679 | 2.39E-05 | hypomethylated |
| cg01541846 | 0.85525 | 0.64024973  | -0.417711 | 2.95E-06 | hypomethylated |
| cg27615603 | 0.65076 | 0.487152973 | -0.417751 | 8.13E-05 | hypomethylated |

|            |         |             |           |          |                |
|------------|---------|-------------|-----------|----------|----------------|
| cg23632393 | 0.58627 | 0.438867568 | -0.41778  | 0.000256 | hypomethylated |
| cg23730696 | 0.84532 | 0.632777297 | -0.4178   | 3.23E-05 | hypomethylated |
| cg02399008 | 0.77217 | 0.578005405 | -0.417836 | 3.39E-06 | hypomethylated |
| cg27042983 | 0.58818 | 0.440277838 | -0.417844 | 2.89E-05 | hypomethylated |
| cg08215954 | 0.78935 | 0.59085027  | -0.417873 | 3.96E-06 | hypomethylated |
| cg26986147 | 0.55748 | 0.417287027 | -0.41788  | 0.004134 | hypomethylated |
| cg04366994 | 0.79068 | 0.591829189 | -0.417913 | 1.26E-05 | hypomethylated |
| cg25276521 | 0.87663 | 0.656151892 | -0.417938 | 5.89E-06 | hypomethylated |
| cg25634141 | 0.49625 | 0.371434595 | -0.417959 | 7.84E-05 | hypomethylated |
| cg01806956 | 0.66804 | 0.500011892 | -0.417972 | 0.002803 | hypomethylated |
| cg15903562 | 0.88874 | 0.665196216 | -0.417981 | 1.14E-05 | hypomethylated |
| cg24833277 | 0.72476 | 0.542387027 | -0.418181 | 6.23E-05 | hypomethylated |
| cg05136724 | 0.82505 | 0.617428649 | -0.418209 | 7.84E-05 | hypomethylated |
| cg21492882 | 0.58553 | 0.438180541 | -0.418218 | 4.82E-05 | hypomethylated |
| cg26055488 | 0.79664 | 0.596156757 | -0.418236 | 2.27E-05 | hypomethylated |
| cg21334510 | 0.58119 | 0.434918378 | -0.418265 | 1.33E-05 | hypomethylated |
| cg00396699 | 0.59154 | 0.44266     | -0.418277 | 7.72E-06 | hypomethylated |
| cg17383272 | 0.71973 | 0.538567568 | -0.418328 | 0.00017  | hypomethylated |
| cg05125838 | 0.50936 | 0.381144865 | -0.418346 | 0.000342 | hypomethylated |
| cg19934294 | 0.62299 | 0.466169189 | -0.418355 | 0.000224 | hypomethylated |
| cg08587313 | 0.7862  | 0.588266486 | -0.418427 | 0.000123 | hypomethylated |
| cg24495350 | 0.76729 | 0.574108649 | -0.418448 | 0.00032  | hypomethylated |
| cg26784300 | 0.83116 | 0.621885405 | -0.418477 | 0.000191 | hypomethylated |
| cg22726373 | 0.73329 | 0.548653514 | -0.418489 | 0.000138 | hypomethylated |
| cg21614107 | 0.9331  | 0.698092432 | -0.418614 | 1.25E-05 | hypomethylated |
| cg22043788 | 0.95056 | 0.711135135 | -0.418654 | 6.86E-05 | hypomethylated |
| cg20340346 | 0.91926 | 0.687712973 | -0.418666 | 0.000161 | hypomethylated |
| cg09370867 | 0.61748 | 0.461943243 | -0.418677 | 0.003021 | hypomethylated |
| cg12907644 | 0.57728 | 0.431868108 | -0.41868  | 0.000474 | hypomethylated |
| cg04339692 | 0.92945 | 0.69521027  | -0.418928 | 4.36E-05 | hypomethylated |
| cg14812474 | 0.62005 | 0.463782703 | -0.418936 | 0.000198 | hypomethylated |
| cg00570628 | 0.72876 | 0.545094054 | -0.418939 | 0.000178 | hypomethylated |
| cg03364620 | 0.62719 | 0.469115135 | -0.418961 | 9.05E-05 | hypomethylated |
| cg27040708 | 0.80201 | 0.599859459 | -0.418996 | 9.83E-05 | hypomethylated |
| cg00368356 | 0.81556 | 0.609994054 | -0.418996 | 4.36E-06 | hypomethylated |
| cg03150378 | 0.85281 | 0.637845405 | -0.419018 | 9.72E-05 | hypomethylated |
| cg25689499 | 0.67598 | 0.505578378 | -0.419046 | 6.46E-05 | hypomethylated |
| cg16348003 | 0.59051 | 0.441647027 | -0.419068 | 0.000132 | hypomethylated |
| cg26804336 | 0.74302 | 0.555684324 | -0.419136 | 6.48E-06 | hypomethylated |
| cg25361506 | 0.65384 | 0.488982703 | -0.419154 | 0.001262 | hypomethylated |
| cg21283302 | 0.83652 | 0.625598919 | -0.419162 | 2.68E-06 | hypomethylated |
| cg13457496 | 0.92954 | 0.695143784 | -0.419206 | 1.54E-05 | hypomethylated |
| cg04334496 | 0.67522 | 0.504949189 | -0.419219 | 0.00024  | hypomethylated |
| cg00600477 | 0.59009 | 0.441284324 | -0.419227 | 0.00024  | hypomethylated |
| cg16361253 | 0.62312 | 0.465979459 | -0.419244 | 7.12E-06 | hypomethylated |
| cg08912860 | 0.80513 | 0.602080541 | -0.419265 | 9.95E-05 | hypomethylated |
| cg02524834 | 0.88097 | 0.658790811 | -0.419272 | 1.66E-05 | hypomethylated |
| cg24672624 | 0.67807 | 0.50705027  | -0.419305 | 0.00255  | hypomethylated |
| cg24335793 | 0.66173 | 0.49479027  | -0.419426 | 2.15E-05 | hypomethylated |
| cg08867471 | 0.7147  | 0.534389189 | -0.419447 | 0.000421 | hypomethylated |
| cg08288237 | 0.88252 | 0.659831892 | -0.41953  | 4.30E-06 | hypomethylated |
| cg03138287 | 0.86094 | 0.643656216 | -0.419622 | 0.000191 | hypomethylated |
| cg16410115 | 0.49339 | 0.368857297 | -0.419666 | 0.000607 | hypomethylated |
| cg01623485 | 0.91877 | 0.686860541 | -0.419687 | 3.08E-06 | hypomethylated |
| cg09314155 | 0.76502 | 0.571896757 | -0.419743 | 3.76E-05 | hypomethylated |
| cg04517258 | 0.70729 | 0.528732432 | -0.419764 | 2.71E-05 | hypomethylated |
| cg24607642 | 0.67439 | 0.504137297 | -0.419766 | 0.000138 | hypomethylated |
| cg07148024 | 0.87755 | 0.656001622 | -0.419782 | 8.26E-06 | hypomethylated |



|            |         |             |           |          |                |
|------------|---------|-------------|-----------|----------|----------------|
| cg08048178 | 0.935   | 0.69892     | -0.419839 | 2.79E-06 | hypomethylated |
| cg02623114 | 0.55442 | 0.414415676 | -0.419901 | 1.60E-05 | hypomethylated |
| cg16879115 | 0.77389 | 0.578460541 | -0.41991  | 0.000107 | hypomethylated |
| cg23909079 | 0.81858 | 0.611864324 | -0.419912 | 1.66E-05 | hypomethylated |
| cg19484680 | 0.85262 | 0.637298378 | -0.419934 | 5.28E-06 | hypomethylated |
| cg23164850 | 0.65779 | 0.491655135 | -0.41998  | 3.85E-05 | hypomethylated |
| cg16692090 | 0.78986 | 0.590367027 | -0.419985 | 0.000176 | hypomethylated |
| cg15345388 | 0.78634 | 0.58772     | -0.420024 | 5.38E-05 | hypomethylated |
| cg21984645 | 0.83624 | 0.625014054 | -0.420028 | 1.66E-05 | hypomethylated |
| cg22956205 | 0.87314 | 0.652512973 | -0.420206 | 1.46E-05 | hypomethylated |
| cg23705155 | 0.79439 | 0.593641081 | -0.420257 | 0.000417 | hypomethylated |
| cg06447799 | 0.55109 | 0.411805405 | -0.420325 | 7.65E-05 | hypomethylated |
| cg26643476 | 0.81819 | 0.611387568 | -0.420349 | 0.000204 | hypomethylated |
| cg10182421 | 0.77851 | 0.581734054 | -0.420356 | 0.00015  | hypomethylated |
| cg07739927 | 0.77639 | 0.58012     | -0.42043  | 0.000152 | hypomethylated |
| cg26473110 | 0.6606  | 0.493597297 | -0.420442 | 0.000102 | hypomethylated |
| cg05885688 | 0.84632 | 0.632362162 | -0.420452 | 4.70E-05 | hypomethylated |
| cg07522403 | 0.90209 | 0.674032432 | -0.420453 | 1.04E-05 | hypomethylated |
| cg00356999 | 0.8952  | 0.668881081 | -0.42046  | 2.87E-06 | hypomethylated |
| cg11200568 | 0.86933 | 0.649527568 | -0.420513 | 1.15E-05 | hypomethylated |
| cg23418510 | 0.76214 | 0.569415676 | -0.420574 | 4.26E-05 | hypomethylated |
| cg24831391 | 0.96156 | 0.718360541 | -0.420669 | 7.12E-06 | hypomethylated |
| cg00007426 | 0.76015 | 0.567881622 | -0.420694 | 3.57E-05 | hypomethylated |
| cg11056766 | 0.66897 | 0.499762703 | -0.420698 | 1.50E-05 | hypomethylated |
| cg05793240 | 0.67209 | 0.502092973 | -0.4207   | 5.79E-05 | hypomethylated |
| cg01463644 | 0.70365 | 0.525666486 | -0.42071  | 4.15E-05 | hypomethylated |
| cg25428846 | 0.74024 | 0.552996216 | -0.420723 | 0.000148 | hypomethylated |
| cg02887458 | 0.62286 | 0.465305405 | -0.42073  | 0.000145 | hypomethylated |
| cg14571539 | 0.77195 | 0.576668649 | -0.420765 | 9.95E-05 | hypomethylated |
| cg16240816 | 0.7261  | 0.542384865 | -0.420851 | 2.04E-05 | hypomethylated |
| cg14771313 | 0.84931 | 0.634402703 | -0.420892 | 5.89E-06 | hypomethylated |
| cg09906448 | 0.71053 | 0.530731892 | -0.420912 | 1.66E-05 | hypomethylated |
| cg01331461 | 0.66001 | 0.492985405 | -0.420943 | 1.99E-05 | hypomethylated |
| cg03286387 | 0.52823 | 0.394552973 | -0.420947 | 0.000245 | hypomethylated |
| cg01119585 | 0.81716 | 0.610334595 | -0.421018 | 3.26E-06 | hypomethylated |
| cg01622018 | 0.51956 | 0.388055135 | -0.421029 | 0.000109 | hypomethylated |
| cg04662250 | 0.76929 | 0.574563784 | -0.42106  | 1.75E-05 | hypomethylated |
| cg00879790 | 0.71682 | 0.535304865 | -0.42125  | 0.000369 | hypomethylated |
| cg24497819 | 0.52921 | 0.395177838 | -0.421338 | 0.002803 | hypomethylated |
| cg09122223 | 0.82505 | 0.616071892 | -0.421383 | 4.00E-05 | hypomethylated |
| cg03343515 | 0.79878 | 0.596455135 | -0.421385 | 1.39E-05 | hypomethylated |
| cg01378182 | 0.52935 | 0.395267027 | -0.421394 | 6.95E-05 | hypomethylated |
| cg08319417 | 0.86896 | 0.648842162 | -0.421422 | 8.03E-05 | hypomethylated |
| cg16430819 | 0.78029 | 0.582588108 | -0.421534 | 0.000245 | hypomethylated |
| cg13996453 | 0.68815 | 0.513775135 | -0.421586 | 0.000256 | hypomethylated |
| cg01397912 | 0.68362 | 0.510345405 | -0.421721 | 0.00043  | hypomethylated |
| cg10665892 | 0.69253 | 0.516984865 | -0.421755 | 0.000417 | hypomethylated |
| cg19683073 | 0.84593 | 0.631482162 | -0.421796 | 0.000112 | hypomethylated |
| cg03164969 | 0.5196  | 0.387873514 | -0.421815 | 6.39E-06 | hypomethylated |
| cg14343701 | 0.75739 | 0.565370811 | -0.421839 | 6.05E-06 | hypomethylated |
| cg22989533 | 0.68703 | 0.512846486 | -0.421846 | 0.00095  | hypomethylated |
| cg08767936 | 0.81701 | 0.609847027 | -0.421906 | 1.94E-05 | hypomethylated |
| cg18010131 | 0.75867 | 0.56628     | -0.421957 | 0.000365 | hypomethylated |
| cg07056299 | 0.68228 | 0.509252973 | -0.421981 | 0.001031 | hypomethylated |
| cg15952840 | 0.76326 | 0.569670811 | -0.422046 | 0.000129 | hypomethylated |
| cg24842334 | 0.61696 | 0.460475676 | -0.422052 | 0.001096 | hypomethylated |
| cg21487099 | 0.63472 | 0.473714054 | -0.422104 | 3.00E-05 | hypomethylated |
| cg12073319 | 0.57059 | 0.425851351 | -0.422105 | 0.000528 | hypomethylated |

|            |         |             |           |          |                |
|------------|---------|-------------|-----------|----------|----------------|
| cg16724070 | 0.85828 | 0.640558378 | -0.422118 | 6.05E-06 | hypomethylated |
| cg01832218 | 0.85114 | 0.635221622 | -0.422136 | 4.01E-06 | hypomethylated |
| cg08595656 | 0.55912 | 0.417237297 | -0.42229  | 6.78E-05 | hypomethylated |
| cg18709710 | 0.70903 | 0.529091351 | -0.42233  | 0.00014  | hypomethylated |
| cg09385936 | 0.83897 | 0.626031351 | -0.422384 | 0.0002   | hypomethylated |
| cg02812767 | 0.45586 | 0.340146486 | -0.422435 | 0.000117 | hypomethylated |
| cg24296397 | 0.6666  | 0.497375676 | -0.422485 | 0.000306 | hypomethylated |
| cg01941278 | 0.77767 | 0.580241081 | -0.422506 | 0.000123 | hypomethylated |
| cg14889070 | 0.81436 | 0.607600541 | -0.422544 | 2.21E-05 | hypomethylated |
| cg01825818 | 0.60882 | 0.454212432 | -0.422649 | 0.002341 | hypomethylated |
| cg24047802 | 0.57753 | 0.430862162 | -0.422669 | 0.000172 | hypomethylated |
| cg13876844 | 0.72552 | 0.541267027 | -0.422675 | 0.00039  | hypomethylated |
| cg02637086 | 0.79737 | 0.594845946 | -0.422733 | 1.21E-05 | hypomethylated |
| cg01795894 | 0.91316 | 0.681214054 | -0.422759 | 2.87E-06 | hypomethylated |
| cg00936935 | 0.70039 | 0.522487568 | -0.422762 | 4.20E-05 | hypomethylated |
| cg09528501 | 0.70226 | 0.523877297 | -0.422776 | 0.000207 | hypomethylated |
| cg01229943 | 0.7932  | 0.591708108 | -0.422799 | 3.15E-05 | hypomethylated |
| cg09226288 | 0.70221 | 0.523820541 | -0.42283  | 1.64E-05 | hypomethylated |
| cg11532182 | 0.63032 | 0.470178378 | -0.422876 | 1.21E-05 | hypomethylated |
| cg20531020 | 0.52032 | 0.38812     | -0.422896 | 0.000271 | hypomethylated |
| cg22676516 | 0.67584 | 0.504118919 | -0.422918 | 0.000245 | hypomethylated |
| cg10514593 | 0.8052  | 0.600591351 | -0.422963 | 3.21E-06 | hypomethylated |
| cg15318662 | 0.94888 | 0.707736757 | -0.423013 | 1.22E-06 | hypomethylated |
| cg02768671 | 0.53529 | 0.399252432 | -0.42302  | 0.000129 | hypomethylated |
| cg20443278 | 0.4747  | 0.354058378 | -0.423029 | 1.84E-05 | hypomethylated |
| cg15863841 | 0.74631 | 0.556630811 | -0.423054 | 0.000182 | hypomethylated |
| cg16031528 | 0.7335  | 0.547028649 | -0.423181 | 2.48E-05 | hypomethylated |
| cg01726448 | 0.84134 | 0.627444324 | -0.423201 | 9.16E-05 | hypomethylated |
| cg13567744 | 0.76941 | 0.573796757 | -0.423213 | 5.19E-05 | hypomethylated |
| cg08036899 | 0.81279 | 0.606142703 | -0.423225 | 3.40E-05 | hypomethylated |
| cg10874111 | 0.84066 | 0.626913514 | -0.423256 | 3.95E-05 | hypomethylated |
| cg18972123 | 0.54583 | 0.407046486 | -0.423258 | 0.005316 | hypomethylated |
| cg05275832 | 0.83925 | 0.625853514 | -0.423276 | 0.000102 | hypomethylated |
| cg17223520 | 0.67944 | 0.506678378 | -0.423276 | 6.75E-06 | hypomethylated |
| cg23278235 | 0.75734 | 0.56476973  | -0.423278 | 9.19E-06 | hypomethylated |
| cg25940485 | 0.86697 | 0.646512432 | -0.423304 | 4.60E-06 | hypomethylated |
| cg00961640 | 0.70555 | 0.526129189 | -0.423331 | 0.0003   | hypomethylated |
| cg02856688 | 0.59739 | 0.445467027 | -0.423354 | 0.00504  | hypomethylated |
| cg14099718 | 0.53401 | 0.398202703 | -0.423364 | 2.57E-05 | hypomethylated |
| cg23899779 | 0.62223 | 0.463971351 | -0.423412 | 3.23E-05 | hypomethylated |
| cg03398002 | 0.6042  | 0.450523784 | -0.423423 | 0.000108 | hypomethylated |
| cg17777603 | 0.71401 | 0.5324      | -0.423434 | 0.00039  | hypomethylated |
| cg19190762 | 0.65211 | 0.486241622 | -0.423442 | 0.000138 | hypomethylated |
| cg26857192 | 0.82023 | 0.611582162 | -0.423482 | 2.23E-06 | hypomethylated |
| cg00795830 | 0.73405 | 0.547295676 | -0.423558 | 0.000148 | hypomethylated |
| cg10847094 | 0.42996 | 0.320536757 | -0.423713 | 0.001395 | hypomethylated |
| cg19611163 | 0.65689 | 0.489702703 | -0.423746 | 5.25E-05 | hypomethylated |
| cg16659773 | 0.49616 | 0.369864324 | -0.423809 | 0.000317 | hypomethylated |
| cg08729279 | 0.8344  | 0.621992432 | -0.423842 | 7.65E-05 | hypomethylated |
| cg11928064 | 0.85323 | 0.636015676 | -0.423872 | 3.71E-05 | hypomethylated |
| cg15618646 | 0.66095 | 0.49268     | -0.42389  | 0.000138 | hypomethylated |
| cg11914650 | 0.91335 | 0.680795676 | -0.423946 | 0.00028  | hypomethylated |
| cg14305659 | 0.76485 | 0.570074054 | -0.424027 | 3.69E-06 | hypomethylated |
| cg06325540 | 0.75539 | 0.563021081 | -0.424033 | 0.000214 | hypomethylated |
| cg24815934 | 0.58366 | 0.435012432 | -0.424072 | 0.000875 | hypomethylated |
| cg11787522 | 0.50799 | 0.378606486 | -0.424101 | 0.000159 | hypomethylated |
| cg26066724 | 0.75853 | 0.565306486 | -0.424173 | 6.38E-05 | hypomethylated |
| cg23826980 | 0.70313 | 0.524015135 | -0.424183 | 0.000256 | hypomethylated |

|            |         |             |           |          |                |
|------------|---------|-------------|-----------|----------|----------------|
| cg12252759 | 0.73798 | 0.549972432 | -0.424222 | 5.31E-05 | hypomethylated |
| cg25307724 | 0.91759 | 0.683810811 | -0.424252 | 1.09E-05 | hypomethylated |
| cg20646556 | 0.70928 | 0.528558919 | -0.424291 | 6.95E-05 | hypomethylated |
| cg03478610 | 0.85481 | 0.636991351 | -0.42433  | 9.57E-06 | hypomethylated |
| cg02654940 | 0.7069  | 0.526757838 | -0.424366 | 0.001409 | hypomethylated |
| cg12565635 | 0.81325 | 0.605997297 | -0.424388 | 0.00024  | hypomethylated |
| cg20660989 | 0.7282  | 0.542616216 | -0.424403 | 0.000327 | hypomethylated |
| cg11203990 | 0.63475 | 0.472974595 | -0.424426 | 2.04E-05 | hypomethylated |
| cg17221226 | 0.63004 | 0.469455135 | -0.424456 | 0.000374 | hypomethylated |
| cg03784611 | 0.95617 | 0.712453514 | -0.424471 | 2.05E-06 | hypomethylated |
| cg25046720 | 0.68427 | 0.509826486 | -0.424559 | 0.00071  | hypomethylated |
| cg13199127 | 0.73012 | 0.543977838 | -0.424586 | 2.85E-05 | hypomethylated |
| cg21137244 | 0.79158 | 0.589761081 | -0.424605 | 2.04E-05 | hypomethylated |
| cg14879645 | 0.75146 | 0.559862703 | -0.424623 | 4.20E-05 | hypomethylated |
| cg10057218 | 0.817   | 0.608687568 | -0.424634 | 4.26E-05 | hypomethylated |
| cg18131582 | 0.78844 | 0.587406486 | -0.424642 | 0.000551 | hypomethylated |
| cg12054171 | 0.93601 | 0.697302162 | -0.42474  | 1.49E-06 | hypomethylated |
| cg26469387 | 0.70974 | 0.528736216 | -0.424742 | 0.001734 | hypomethylated |
| cg09981198 | 0.74035 | 0.551524324 | -0.424783 | 0.000123 | hypomethylated |
| cg13908299 | 0.65616 | 0.488800541 | -0.424802 | 1.01E-05 | hypomethylated |
| cg11874976 | 0.83061 | 0.618749189 | -0.424817 | 0.000262 | hypomethylated |
| cg26109145 | 0.80245 | 0.597755676 | -0.424856 | 4.05E-05 | hypomethylated |
| cg03638937 | 0.93792 | 0.698627568 | -0.424941 | 4.54E-06 | hypomethylated |
| cg19735903 | 0.74089 | 0.551829189 | -0.425038 | 0.000703 | hypomethylated |
| cg26523175 | 0.71948 | 0.535870811 | -0.425069 | 8.42E-05 | hypomethylated |
| cg03630386 | 0.65432 | 0.487327568 | -0.425105 | 5.12E-05 | hypomethylated |
| cg22615730 | 0.80604 | 0.600321622 | -0.425116 | 0.000166 | hypomethylated |
| cg11772193 | 0.80972 | 0.603057297 | -0.425128 | 3.21E-06 | hypomethylated |
| cg10794973 | 0.59421 | 0.442542703 | -0.425156 | 0.001912 | hypomethylated |
| cg05622577 | 0.66579 | 0.495848649 | -0.425167 | 0.000342 | hypomethylated |
| cg04685253 | 0.78239 | 0.582679459 | -0.425185 | 2.27E-05 | hypomethylated |
| cg05631194 | 0.76334 | 0.568432432 | -0.425337 | 0.000104 | hypomethylated |
| cg15998505 | 0.63986 | 0.476473514 | -0.42536  | 0.000135 | hypomethylated |
| cg24662231 | 0.43251 | 0.322063784 | -0.425387 | 5.32E-05 | hypomethylated |
| cg25609480 | 0.90028 | 0.670364865 | -0.425427 | 4.60E-06 | hypomethylated |
| cg20293725 | 0.65605 | 0.488494595 | -0.425463 | 0.000178 | hypomethylated |
| cg08403419 | 0.60223 | 0.448402703 | -0.42552  | 7.03E-05 | hypomethylated |
| cg03918756 | 0.86751 | 0.645857838 | -0.425664 | 7.52E-06 | hypomethylated |
| cg10970500 | 0.85401 | 0.635736757 | -0.425823 | 3.21E-06 | hypomethylated |
| cg27499105 | 0.62278 | 0.463604324 | -0.425829 | 0.000688 | hypomethylated |
| cg11406388 | 0.95967 | 0.714386486 | -0.425834 | 2.07E-06 | hypomethylated |
| cg12793803 | 0.48591 | 0.361706486 | -0.42587  | 0.002168 | hypomethylated |
| cg06539091 | 0.66881 | 0.497830811 | -0.425941 | 0.000129 | hypomethylated |
| cg17981101 | 0.90517 | 0.673726486 | -0.426026 | 2.42E-06 | hypomethylated |
| cg10374402 | 0.81632 | 0.607571351 | -0.426081 | 6.62E-05 | hypomethylated |
| cg16519772 | 0.84586 | 0.629551892 | -0.426094 | 1.99E-05 | hypomethylated |
| cg09098720 | 0.66097 | 0.491942162 | -0.426096 | 7.29E-05 | hypomethylated |
| cg04884025 | 0.6048  | 0.450131351 | -0.426112 | 0.000256 | hypomethylated |
| cg03687765 | 0.64705 | 0.481568649 | -0.426136 | 4.07E-06 | hypomethylated |
| cg12960126 | 0.78276 | 0.582565405 | -0.42615  | 5.35E-06 | hypomethylated |
| cg05116443 | 0.92057 | 0.685109189 | -0.426193 | 1.87E-05 | hypomethylated |
| cg20698410 | 0.91429 | 0.680427568 | -0.42621  | 1.15E-06 | hypomethylated |
| cg05449217 | 0.46308 | 0.344629189 | -0.426217 | 0.002502 | hypomethylated |
| cg03051116 | 0.61838 | 0.460187568 | -0.426272 | 0.000204 | hypomethylated |
| cg24791666 | 0.54087 | 0.402471892 | -0.426394 | 0.000789 | hypomethylated |
| cg18497162 | 0.72751 | 0.541337297 | -0.426439 | 7.29E-05 | hypomethylated |
| cg14977069 | 0.72047 | 0.536088108 | -0.426468 | 0.000251 | hypomethylated |
| cg16731016 | 0.78869 | 0.586820541 | -0.426539 | 0.00017  | hypomethylated |

|            |         |             |           |          |                |
|------------|---------|-------------|-----------|----------|----------------|
| cg17910564 | 0.75678 | 0.563070811 | -0.426558 | 0.000435 | hypomethylated |
| cg15718528 | 0.73109 | 0.543938919 | -0.426604 | 7.84E-05 | hypomethylated |
| cg07669969 | 0.66319 | 0.493415135 | -0.42662  | 0.000104 | hypomethylated |
| cg02283238 | 0.81281 | 0.604703243 | -0.426691 | 0.000262 | hypomethylated |
| cg22011888 | 0.85365 | 0.635078919 | -0.426709 | 3.69E-06 | hypomethylated |
| cg03970915 | 0.83832 | 0.623658919 | -0.426744 | 2.39E-05 | hypomethylated |
| cg00780520 | 0.87351 | 0.649826486 | -0.42677  | 2.71E-05 | hypomethylated |
| cg20987067 | 0.58527 | 0.43538     | -0.426827 | 3.67E-05 | hypomethylated |
| cg27219955 | 0.60992 | 0.453690811 | -0.426911 | 3.15E-05 | hypomethylated |
| cg16351441 | 0.89667 | 0.666961081 | -0.426975 | 2.71E-05 | hypomethylated |
| cg11132469 | 0.75498 | 0.561551892 | -0.427019 | 4.82E-05 | hypomethylated |
| cg08432509 | 0.66009 | 0.490967027 | -0.427037 | 0.000256 | hypomethylated |
| cg01859228 | 0.67302 | 0.500573514 | -0.427067 | 2.85E-05 | hypomethylated |
| cg15765889 | 0.87577 | 0.651348649 | -0.427122 | 1.35E-05 | hypomethylated |
| cg21576256 | 0.84342 | 0.627277838 | -0.427147 | 1.47E-06 | hypomethylated |
| cg25298754 | 0.75002 | 0.557797297 | -0.427188 | 0.000626 | hypomethylated |
| cg06564875 | 0.7686  | 0.571614054 | -0.427192 | 0.00028  | hypomethylated |
| cg12411858 | 0.65248 | 0.485242162 | -0.427229 | 2.51E-05 | hypomethylated |
| cg25210134 | 0.43211 | 0.321353514 | -0.427237 | 0.002455 | hypomethylated |
| cg26562921 | 0.6637  | 0.49356973  | -0.427277 | 0.000726 | hypomethylated |
| cg13553455 | 0.69858 | 0.519478378 | -0.427362 | 0.000178 | hypomethylated |
| cg22482278 | 0.96483 | 0.717463243 | -0.42737  | 5.07E-06 | hypomethylated |
| cg26646427 | 0.71428 | 0.531130811 | -0.427423 | 2.71E-05 | hypomethylated |
| cg19247032 | 0.69424 | 0.516204865 | -0.427491 | 0.000109 | hypomethylated |
| cg16098545 | 0.84303 | 0.626833514 | -0.427502 | 2.10E-05 | hypomethylated |
| cg13975093 | 0.88039 | 0.654597838 | -0.427534 | 1.94E-05 | hypomethylated |
| cg05364179 | 0.81538 | 0.606254595 | -0.427549 | 6.15E-05 | hypomethylated |
| cg03284102 | 0.79397 | 0.590332973 | -0.427556 | 2.51E-05 | hypomethylated |
| cg20445283 | 0.73049 | 0.543126486 | -0.427576 | 2.64E-05 | hypomethylated |
| cg01371233 | 0.92301 | 0.686255676 | -0.4276   | 4.10E-05 | hypomethylated |
| cg21007971 | 0.8253  | 0.613602703 | -0.427614 | 1.99E-06 | hypomethylated |
| cg20239639 | 0.67251 | 0.499992973 | -0.427648 | 7.74E-05 | hypomethylated |
| cg11218176 | 0.65225 | 0.484918919 | -0.427681 | 2.64E-06 | hypomethylated |
| cg11590932 | 0.84749 | 0.630064865 | -0.427696 | 3.62E-05 | hypomethylated |
| cg18818531 | 0.37318 | 0.277431892 | -0.427738 | 6.08E-05 | hypomethylated |
| cg19019345 | 0.66584 | 0.494985946 | -0.427788 | 0.000296 | hypomethylated |
| cg21079719 | 0.87244 | 0.648571892 | -0.427789 | 2.13E-05 | hypomethylated |
| cg15826891 | 0.87459 | 0.650124865 | -0.42789  | 7.52E-06 | hypomethylated |
| cg23193616 | 0.59804 | 0.444528649 | -0.427966 | 4.05E-05 | hypomethylated |
| cg17628894 | 0.46403 | 0.344911351 | -0.427992 | 4.10E-05 | hypomethylated |
| cg10151799 | 0.7611  | 0.565707568 | -0.42803  | 6.31E-05 | hypomethylated |
| cg13019844 | 0.47506 | 0.353068649 | -0.428161 | 0.00018  | hypomethylated |
| cg17431952 | 0.84527 | 0.628196216 | -0.428197 | 2.51E-05 | hypomethylated |
| cg14051181 | 0.67664 | 0.502868649 | -0.428207 | 8.83E-06 | hypomethylated |
| cg27174108 | 0.57385 | 0.426473514 | -0.428218 | 9.27E-05 | hypomethylated |
| cg15612947 | 0.76506 | 0.568551892 | -0.428281 | 0.000528 | hypomethylated |
| cg15450349 | 0.873   | 0.648754595 | -0.428309 | 6.78E-05 | hypomethylated |
| cg05347456 | 0.46437 | 0.345086486 | -0.428317 | 0.001635 | hypomethylated |
| cg23243343 | 0.7387  | 0.548924324 | -0.428381 | 4.00E-05 | hypomethylated |
| cg26049390 | 0.65017 | 0.483117297 | -0.428443 | 0.00101  | hypomethylated |
| cg07180475 | 0.6139  | 0.456157838 | -0.428471 | 0.000182 | hypomethylated |
| cg15329642 | 0.53045 | 0.394144865 | -0.428491 | 9.72E-05 | hypomethylated |
| cg26674445 | 0.6947  | 0.516180541 | -0.428514 | 0.000159 | hypomethylated |
| cg21251203 | 0.7386  | 0.548787027 | -0.428547 | 5.06E-05 | hypomethylated |
| cg03033543 | 0.8121  | 0.603366486 | -0.428623 | 1.39E-05 | hypomethylated |
| cg12603369 | 0.70893 | 0.526701081 | -0.428659 | 0.000163 | hypomethylated |
| cg07631533 | 0.61307 | 0.455470811 | -0.428693 | 4.88E-05 | hypomethylated |
| cg02753354 | 0.46926 | 0.34862     | -0.428732 | 0.002126 | hypomethylated |

|            |         |             |           |          |                |
|------------|---------|-------------|-----------|----------|----------------|
| cg02334660 | 0.89817 | 0.667262162 | -0.428735 | 1.88E-06 | hypomethylated |
| cg01412886 | 0.56452 | 0.419363243 | -0.428824 | 0.001949 | hypomethylated |
| cg21900078 | 0.74728 | 0.555126486 | -0.428832 | 8.15E-06 | hypomethylated |
| cg27305009 | 0.66936 | 0.497231351 | -0.428865 | 0.000454 | hypomethylated |
| cg00942293 | 0.63836 | 0.474166486 | -0.428977 | 2.64E-05 | hypomethylated |
| cg12974832 | 0.6442  | 0.478502162 | -0.428983 | 0.000875 | hypomethylated |
| cg19240569 | 0.69879 | 0.51905027  | -0.428985 | 0.000293 | hypomethylated |
| cg15431934 | 0.4032  | 0.299488108 | -0.428997 | 0.002856 | hypomethylated |
| cg00259019 | 0.87615 | 0.650777838 | -0.429013 | 2.15E-05 | hypomethylated |
| cg18065174 | 0.93248 | 0.692617297 | -0.429014 | 1.89E-05 | hypomethylated |
| cg12496975 | 0.79201 | 0.588261081 | -0.429062 | 0.000107 | hypomethylated |
| cg13795689 | 0.65257 | 0.484678919 | -0.429103 | 1.66E-05 | hypomethylated |
| cg00181327 | 0.55273 | 0.410517297 | -0.429132 | 0.000152 | hypomethylated |
| cg11012543 | 0.77246 | 0.573711892 | -0.429134 | 1.54E-05 | hypomethylated |
| cg00731691 | 0.66168 | 0.491427568 | -0.429155 | 1.82E-05 | hypomethylated |
| cg21207450 | 0.77426 | 0.575031892 | -0.429176 | 6.62E-05 | hypomethylated |
| cg19642408 | 0.61734 | 0.458487027 | -0.429184 | 0.000104 | hypomethylated |
| cg04275506 | 0.77705 | 0.577097838 | -0.429192 | 3.53E-05 | hypomethylated |
| cg11247087 | 0.78691 | 0.584369189 | -0.429319 | 1.84E-05 | hypomethylated |
| cg06521149 | 0.85964 | 0.638368649 | -0.429343 | 1.42E-05 | hypomethylated |
| cg22531801 | 0.72077 | 0.535223243 | -0.429398 | 0.001237 | hypomethylated |
| cg14195117 | 0.55248 | 0.410233514 | -0.429477 | 2.32E-05 | hypomethylated |
| cg00187981 | 0.88479 | 0.656981622 | -0.429482 | 2.78E-05 | hypomethylated |
| cg11479035 | 0.93505 | 0.694287568 | -0.42951  | 4.93E-06 | hypomethylated |
| cg22954687 | 0.7158  | 0.53148973  | -0.429515 | 0.001063 | hypomethylated |
| cg09336922 | 0.73896 | 0.548684865 | -0.429518 | 2.30E-05 | hypomethylated |
| cg17399143 | 0.55848 | 0.414665405 | -0.429558 | 0.000931 | hypomethylated |
| cg17820025 | 0.58223 | 0.432287027 | -0.4296   | 3.11E-05 | hypomethylated |
| cg05114898 | 0.55096 | 0.409062703 | -0.429626 | 1.58E-05 | hypomethylated |
| cg19820609 | 0.61242 | 0.454688649 | -0.429642 | 1.20E-05 | hypomethylated |
| cg27648224 | 0.75947 | 0.563843784 | -0.429697 | 3.15E-05 | hypomethylated |
| cg06244306 | 0.89914 | 0.667509189 | -0.429758 | 1.80E-05 | hypomethylated |
| cg17488500 | 0.74424 | 0.552510811 | -0.429765 | 6.46E-05 | hypomethylated |
| cg11071912 | 0.66507 | 0.493711351 | -0.429838 | 9.95E-05 | hypomethylated |
| cg07352691 | 0.73952 | 0.548965946 | -0.429873 | 2.39E-05 | hypomethylated |
| cg27346988 | 0.62676 | 0.465250811 | -0.429904 | 1.82E-05 | hypomethylated |
| cg04476341 | 0.76493 | 0.567794595 | -0.429959 | 7.93E-06 | hypomethylated |
| cg06100324 | 0.84303 | 0.625755135 | -0.429986 | 6.57E-06 | hypomethylated |
| cg02331673 | 0.65776 | 0.488223784 | -0.430019 | 1.71E-05 | hypomethylated |
| cg18128495 | 0.74958 | 0.556349189 | -0.430092 | 1.80E-05 | hypomethylated |
| cg26949055 | 0.8639  | 0.641144324 | -0.430215 | 5.93E-05 | hypomethylated |
| cg13304638 | 0.80587 | 0.598074054 | -0.430223 | 0.000256 | hypomethylated |
| cg06080300 | 0.81768 | 0.606819459 | -0.430269 | 1.25E-05 | hypomethylated |
| cg18842310 | 0.59455 | 0.441207027 | -0.430342 | 0.000172 | hypomethylated |
| cg08711281 | 0.7357  | 0.545950811 | -0.430347 | 6.57E-06 | hypomethylated |
| cg01520454 | 0.69667 | 0.516977838 | -0.430373 | 3.90E-06 | hypomethylated |
| cg19196806 | 0.70976 | 0.526661622 | -0.430455 | 2.39E-05 | hypomethylated |
| cg03839782 | 0.81103 | 0.601766486 | -0.430552 | 1.09E-05 | hypomethylated |
| cg11158374 | 0.8173  | 0.606412432 | -0.430566 | 4.73E-06 | hypomethylated |
| cg16377880 | 0.70785 | 0.525193514 | -0.430595 | 2.10E-05 | hypomethylated |
| cg24806326 | 0.63591 | 0.471810811 | -0.430614 | 0.000104 | hypomethylated |
| cg20282814 | 0.76095 | 0.564581081 | -0.430621 | 3.15E-05 | hypomethylated |
| cg01120874 | 0.46742 | 0.346780541 | -0.430697 | 0.001452 | hypomethylated |
| cg04658243 | 0.71894 | 0.533361081 | -0.430759 | 0.000399 | hypomethylated |
| cg25424299 | 0.53398 | 0.396130811 | -0.430809 | 5.79E-05 | hypomethylated |
| cg00061635 | 0.65386 | 0.485063243 | -0.430809 | 5.32E-05 | hypomethylated |
| cg14244439 | 0.44795 | 0.332309189 | -0.430812 | 0.001262 | hypomethylated |
| cg08458711 | 0.72779 | 0.539904324 | -0.430818 | 1.42E-05 | hypomethylated |

|            |         |             |           |          |                |
|------------|---------|-------------|-----------|----------|----------------|
| cg18373855 | 0.79976 | 0.593268649 | -0.430882 | 0.00097  | hypomethylated |
| cg00733115 | 0.42429 | 0.314730811 | -0.430932 | 0.000293 | hypomethylated |
| cg24119674 | 0.54159 | 0.401739459 | -0.430941 | 0.000176 | hypomethylated |
| cg26431550 | 0.60002 | 0.445065946 | -0.430991 | 0.000159 | hypomethylated |
| cg25251459 | 0.79897 | 0.592576757 | -0.431139 | 9.95E-05 | hypomethylated |
| cg12588880 | 0.48958 | 0.36309027  | -0.431216 | 0.00054  | hypomethylated |
| cg02863988 | 0.65832 | 0.48823027  | -0.431227 | 0.00017  | hypomethylated |
| cg09038599 | 0.74423 | 0.551942162 | -0.431231 | 0.000495 | hypomethylated |
| cg04930921 | 0.83909 | 0.622268108 | -0.431289 | 4.47E-05 | hypomethylated |
| cg17960629 | 0.50364 | 0.373492973 | -0.431312 | 7.47E-05 | hypomethylated |
| cg01057945 | 0.65608 | 0.48653027  | -0.431342 | 3.85E-05 | hypomethylated |
| cg05587926 | 0.89322 | 0.662368649 | -0.431381 | 6.48E-06 | hypomethylated |
| cg12807237 | 0.69615 | 0.516227568 | -0.431391 | 9.57E-06 | hypomethylated |
| cg25424279 | 0.61787 | 0.458176757 | -0.431399 | 0.0006   | hypomethylated |
| cg10907866 | 0.77158 | 0.572152432 | -0.431416 | 0.000259 | hypomethylated |
| cg14760020 | 0.67752 | 0.502401622 | -0.431422 | 0.000104 | hypomethylated |
| cg04299274 | 0.58562 | 0.434245405 | -0.431454 | 6.31E-05 | hypomethylated |
| cg03440799 | 0.86787 | 0.643535135 | -0.43146  | 4.26E-05 | hypomethylated |
| cg15663823 | 0.85466 | 0.633738919 | -0.431462 | 7.72E-06 | hypomethylated |
| cg22116041 | 0.59822 | 0.44356     | -0.431547 | 0.00395  | hypomethylated |
| cg08968034 | 0.59896 | 0.44409027  | -0.431607 | 7.12E-05 | hypomethylated |
| cg08949735 | 0.7407  | 0.549148108 | -0.431694 | 3.21E-06 | hypomethylated |
| cg19459434 | 0.78391 | 0.58117027  | -0.431727 | 5.58E-06 | hypomethylated |
| cg03698144 | 0.74208 | 0.550157297 | -0.431731 | 3.67E-05 | hypomethylated |
| cg25259564 | 0.95287 | 0.706425405 | -0.431742 | 3.62E-05 | hypomethylated |
| cg19710662 | 0.60324 | 0.447218919 | -0.431751 | 1.84E-05 | hypomethylated |
| cg15428904 | 0.80257 | 0.594944324 | -0.431873 | 1.89E-05 | hypomethylated |
| cg22065124 | 0.86637 | 0.642211892 | -0.431934 | 1.31E-05 | hypomethylated |
| cg01447427 | 0.50369 | 0.373368108 | -0.431937 | 0.000202 | hypomethylated |
| cg04295322 | 0.64958 | 0.481503784 | -0.43196  | 4.58E-05 | hypomethylated |
| cg01917266 | 0.80077 | 0.593569189 | -0.431972 | 5.19E-05 | hypomethylated |
| cg24478966 | 0.94812 | 0.702783784 | -0.431989 | 5.28E-06 | hypomethylated |
| cg15016481 | 0.74717 | 0.553795676 | -0.432083 | 8.22E-05 | hypomethylated |
| cg16105591 | 0.56098 | 0.415791351 | -0.43209  | 0.000262 | hypomethylated |
| cg24109894 | 0.73877 | 0.547549189 | -0.432137 | 0.00012  | hypomethylated |
| cg08429256 | 0.60997 | 0.452048649 | -0.43226  | 0.000221 | hypomethylated |
| cg13680337 | 0.5242  | 0.388481081 | -0.432273 | 4.64E-05 | hypomethylated |
| cg07843568 | 0.71158 | 0.527341622 | -0.432288 | 2.32E-05 | hypomethylated |
| cg10061384 | 0.65028 | 0.481902162 | -0.432321 | 1.01E-05 | hypomethylated |
| cg17156828 | 0.85597 | 0.634321622 | -0.432346 | 3.57E-05 | hypomethylated |
| cg04221650 | 0.7984  | 0.591648649 | -0.432371 | 2.81E-05 | hypomethylated |
| cg11702866 | 0.6368  | 0.471882703 | -0.432412 | 0.000667 | hypomethylated |
| cg00259234 | 0.95747 | 0.709503784 | -0.432417 | 3.64E-06 | hypomethylated |
| cg08687163 | 0.67048 | 0.496836757 | -0.432422 | 1.99E-05 | hypomethylated |
| cg14437634 | 0.84948 | 0.629472973 | -0.432436 | 8.22E-05 | hypomethylated |
| cg26578156 | 0.78706 | 0.583211892 | -0.432453 | 3.40E-05 | hypomethylated |
| cg26472036 | 0.82898 | 0.614272973 | -0.432457 | 6.78E-05 | hypomethylated |
| cg26305174 | 0.73492 | 0.544539459 | -0.432551 | 0.000327 | hypomethylated |
| cg01279632 | 0.71797 | 0.531958378 | -0.43261  | 8.71E-06 | hypomethylated |
| cg26567736 | 0.60734 | 0.449980541 | -0.432642 | 0.000495 | hypomethylated |
| cg01446731 | 0.80905 | 0.599404324 | -0.432699 | 6.15E-05 | hypomethylated |
| cg06726231 | 0.71251 | 0.527879459 | -0.432702 | 2.78E-05 | hypomethylated |
| cg23875404 | 0.52903 | 0.391922703 | -0.43278  | 0.000501 | hypomethylated |
| cg18330338 | 0.7175  | 0.531539459 | -0.432802 | 5.72E-05 | hypomethylated |
| cg15825304 | 0.50641 | 0.375147027 | -0.43285  | 0.001541 | hypomethylated |
| cg06875832 | 0.90979 | 0.673958919 | -0.432873 | 8.37E-06 | hypomethylated |
| cg19474571 | 0.49719 | 0.368302703 | -0.432905 | 3.67E-05 | hypomethylated |
| cg20911165 | 0.83829 | 0.620958378 | -0.432953 | 4.36E-05 | hypomethylated |

|            |         |             |           |          |                |
|------------|---------|-------------|-----------|----------|----------------|
| cg02377915 | 0.73269 | 0.542720541 | -0.432993 | 1.60E-05 | hypomethylated |
| cg05488681 | 0.847   | 0.627392432 | -0.432994 | 8.37E-06 | hypomethylated |
| cg13316404 | 0.72131 | 0.534282703 | -0.433016 | 1.94E-05 | hypomethylated |
| cg25113767 | 0.48356 | 0.35817027  | -0.433049 | 0.000143 | hypomethylated |
| cg23881697 | 0.69348 | 0.51362     | -0.433153 | 2.15E-05 | hypomethylated |
| cg10025830 | 0.36556 | 0.270735135 | -0.433226 | 0.000902 | hypomethylated |
| cg13273136 | 0.50791 | 0.37614     | -0.433303 | 0.002386 | hypomethylated |
| cg00080125 | 0.6627  | 0.49077027  | -0.433308 | 0.000696 | hypomethylated |
| cg17866650 | 0.88175 | 0.652975135 | -0.433342 | 1.12E-06 | hypomethylated |
| cg03467825 | 0.60877 | 0.450814595 | -0.433363 | 0.000187 | hypomethylated |
| cg00599124 | 0.67266 | 0.498096216 | -0.433453 | 0.000718 | hypomethylated |
| cg21346966 | 0.50568 | 0.374408108 | -0.433613 | 6.78E-05 | hypomethylated |
| cg00525683 | 0.75358 | 0.557944865 | -0.433638 | 0.00028  | hypomethylated |
| cg02694576 | 0.91513 | 0.677518919 | -0.433715 | 3.76E-05 | hypomethylated |
| cg13375571 | 0.66595 | 0.493003784 | -0.433815 | 0.00102  | hypomethylated |
| cg14790115 | 0.70065 | 0.518686486 | -0.433831 | 0.000464 | hypomethylated |
| cg03717367 | 0.58984 | 0.436624324 | -0.433931 | 0.00035  | hypomethylated |
| cg11772804 | 0.65705 | 0.486367568 | -0.433956 | 4.73E-06 | hypomethylated |
| cg05570141 | 0.7693  | 0.56944     | -0.434002 | 0.000528 | hypomethylated |
| cg08412316 | 0.86926 | 0.643394595 | -0.434084 | 4.86E-06 | hypomethylated |
| cg03137629 | 0.80844 | 0.598345405 | -0.434162 | 0.00013  | hypomethylated |
| cg10696677 | 0.57472 | 0.425354595 | -0.434193 | 0.000102 | hypomethylated |
| cg16397638 | 0.92861 | 0.687238919 | -0.434261 | 5.58E-06 | hypomethylated |
| cg03758633 | 0.7696  | 0.569559459 | -0.434262 | 0.00029  | hypomethylated |
| cg14339650 | 0.57313 | 0.424156216 | -0.434267 | 8.22E-05 | hypomethylated |
| cg14397813 | 0.86059 | 0.636884324 | -0.434295 | 2.27E-05 | hypomethylated |
| cg08594606 | 0.95184 | 0.704335135 | -0.434457 | 5.07E-06 | hypomethylated |
| cg22524864 | 0.93301 | 0.690320541 | -0.434626 | 1.15E-05 | hypomethylated |
| cg05894719 | 0.86573 | 0.640517838 | -0.434678 | 3.21E-06 | hypomethylated |
| cg07828024 | 0.7564  | 0.55960973  | -0.434728 | 0.000172 | hypomethylated |
| cg01135165 | 0.88669 | 0.655969189 | -0.434802 | 2.32E-05 | hypomethylated |
| cg09043456 | 0.53073 | 0.392628108 | -0.434815 | 8.84E-05 | hypomethylated |
| cg25423174 | 0.62784 | 0.464461622 | -0.434838 | 1.71E-05 | hypomethylated |
| cg16388983 | 0.80744 | 0.597303243 | -0.434892 | 0.000185 | hypomethylated |
| cg09611620 | 0.737   | 0.54516973  | -0.434959 | 0.003316 | hypomethylated |
| cg25446191 | 0.90431 | 0.668926486 | -0.43497  | 1.72E-06 | hypomethylated |
| cg26609120 | 0.55088 | 0.407483243 | -0.434997 | 0.007799 | hypomethylated |
| cg06430753 | 0.68688 | 0.508038919 | -0.435119 | 0.000408 | hypomethylated |
| cg01766718 | 0.89128 | 0.659178378 | -0.43521  | 1.06E-05 | hypomethylated |
| cg05368724 | 0.7718  | 0.570782162 | -0.435287 | 1.29E-06 | hypomethylated |
| cg12439423 | 0.72175 | 0.533767568 | -0.435288 | 2.71E-05 | hypomethylated |
| cg24710671 | 0.83215 | 0.615396757 | -0.435327 | 6.57E-06 | hypomethylated |
| cg18767964 | 0.66922 | 0.494903243 | -0.435334 | 2.81E-05 | hypomethylated |
| cg03540589 | 0.59311 | 0.438611892 | -0.435355 | 0.000296 | hypomethylated |
| cg06720722 | 0.77467 | 0.572877297 | -0.435356 | 0.000408 | hypomethylated |
| cg02144647 | 0.82653 | 0.611227568 | -0.435358 | 2.45E-05 | hypomethylated |
| cg18642361 | 0.9066  | 0.670419459 | -0.435402 | 1.70E-06 | hypomethylated |
| cg11053466 | 0.72765 | 0.538062703 | -0.43547  | 1.06E-05 | hypomethylated |
| cg23012855 | 0.8747  | 0.646795135 | -0.435479 | 1.58E-05 | hypomethylated |
| cg01874334 | 0.71379 | 0.527807568 | -0.435488 | 4.26E-05 | hypomethylated |
| cg11043993 | 0.65906 | 0.487320541 | -0.435539 | 7.12E-06 | hypomethylated |
| cg24579589 | 0.55751 | 0.412230811 | -0.435545 | 1.21E-05 | hypomethylated |
| cg07167933 | 0.63467 | 0.469260541 | -0.435617 | 4.10E-05 | hypomethylated |
| cg01196079 | 0.58971 | 0.436013514 | -0.435633 | 1.46E-05 | hypomethylated |
| cg17837192 | 0.69888 | 0.516721622 | -0.435658 | 0.001395 | hypomethylated |
| cg04737124 | 0.79929 | 0.590934595 | -0.435721 | 0.000245 | hypomethylated |
| cg15923943 | 0.60388 | 0.446462162 | -0.435724 | 0.00017  | hypomethylated |
| cg26585416 | 0.71037 | 0.525152973 | -0.435833 | 0.000464 | hypomethylated |

|            |         |             |           |          |                |
|------------|---------|-------------|-----------|----------|----------------|
| cg09981464 | 0.88932 | 0.657437297 | -0.435849 | 1.46E-05 | hypomethylated |
| cg24845165 | 0.73435 | 0.542862703 | -0.43588  | 0.00012  | hypomethylated |
| cg23981702 | 0.82251 | 0.608020541 | -0.435913 | 0.00012  | hypomethylated |
| cg21235678 | 0.75319 | 0.556768108 | -0.435937 | 0.000209 | hypomethylated |
| cg16703220 | 0.84682 | 0.625980541 | -0.435938 | 4.15E-05 | hypomethylated |
| cg00249974 | 0.78784 | 0.582341081 | -0.436038 | 4.70E-05 | hypomethylated |
| cg00172803 | 0.73514 | 0.543374595 | -0.436072 | 1.18E-05 | hypomethylated |
| cg15955277 | 0.96172 | 0.710828108 | -0.436116 | 4.73E-06 | hypomethylated |
| cg04177684 | 0.56592 | 0.418282703 | -0.43612  | 0.000163 | hypomethylated |
| cg19251326 | 0.67976 | 0.502417297 | -0.436139 | 2.57E-05 | hypomethylated |
| cg23250019 | 0.73987 | 0.546826486 | -0.436189 | 2.38E-05 | hypomethylated |
| cg17250770 | 0.78731 | 0.58187027  | -0.436234 | 1.40E-05 | hypomethylated |
| cg02137956 | 0.75365 | 0.556968108 | -0.4363   | 7.84E-05 | hypomethylated |
| cg25376593 | 0.8969  | 0.662827568 | -0.436314 | 3.08E-06 | hypomethylated |
| cg01930947 | 0.88027 | 0.650529189 | -0.436332 | 8.60E-06 | hypomethylated |
| cg15704408 | 0.80205 | 0.592715135 | -0.436353 | 8.60E-06 | hypomethylated |
| cg10721942 | 0.75593 | 0.558628649 | -0.436363 | 9.07E-06 | hypomethylated |
| cg00858400 | 0.69501 | 0.513601081 | -0.436385 | 0.000464 | hypomethylated |
| cg16746901 | 0.87538 | 0.646887027 | -0.436396 | 0.000152 | hypomethylated |
| cg11230112 | 0.87527 | 0.64678     | -0.436453 | 4.26E-05 | hypomethylated |
| cg08070476 | 0.80832 | 0.597283784 | -0.43651  | 0.000126 | hypomethylated |
| cg16675525 | 0.48674 | 0.359654595 | -0.436539 | 0.000528 | hypomethylated |
| cg13702185 | 0.86479 | 0.638992973 | -0.43655  | 1.82E-06 | hypomethylated |
| cg07560741 | 0.93001 | 0.687173514 | -0.436572 | 1.94E-05 | hypomethylated |
| cg18298997 | 0.86738 | 0.640883784 | -0.436601 | 5.50E-06 | hypomethylated |
| cg01314165 | 0.91039 | 0.672630811 | -0.43667  | 6.57E-06 | hypomethylated |
| cg13335567 | 0.75681 | 0.559159459 | -0.436671 | 0.00064  | hypomethylated |
| cg14285881 | 0.70459 | 0.52057027  | -0.436691 | 3.85E-05 | hypomethylated |
| cg02976843 | 0.66624 | 0.492231892 | -0.436704 | 3.76E-05 | hypomethylated |
| cg15512715 | 0.77211 | 0.570429189 | -0.436759 | 1.25E-05 | hypomethylated |
| cg20837735 | 0.8505  | 0.628333514 | -0.436781 | 0.000123 | hypomethylated |
| cg26389955 | 0.74689 | 0.551731892 | -0.436928 | 3.85E-05 | hypomethylated |
| cg16295461 | 0.86197 | 0.636675135 | -0.43708  | 2.21E-05 | hypomethylated |
| cg20331980 | 0.68557 | 0.506381081 | -0.43708  | 5.06E-05 | hypomethylated |
| cg00920938 | 0.5497  | 0.406013514 | -0.437117 | 0.001803 | hypomethylated |
| cg09207296 | 0.80847 | 0.597138378 | -0.437129 | 2.85E-05 | hypomethylated |
| cg08196138 | 0.45764 | 0.337988649 | -0.437238 | 0.000135 | hypomethylated |
| cg26175343 | 0.56516 | 0.417387568 | -0.437272 | 0.000256 | hypomethylated |
| cg17482237 | 0.89524 | 0.661144324 | -0.437309 | 5.58E-06 | hypomethylated |
| cg14254767 | 0.53442 | 0.394667568 | -0.437336 | 7.41E-06 | hypomethylated |
| cg03058163 | 0.81378 | 0.600945946 | -0.437404 | 8.37E-06 | hypomethylated |
| cg13285077 | 0.67945 | 0.501740541 | -0.437426 | 1.46E-05 | hypomethylated |
| cg15353603 | 0.6437  | 0.475323243 | -0.43748  | 6.95E-05 | hypomethylated |
| cg18642234 | 0.67961 | 0.501777297 | -0.43766  | 0.000893 | hypomethylated |
| cg10721755 | 0.77393 | 0.571414054 | -0.437667 | 6.70E-05 | hypomethylated |
| cg19512969 | 0.76803 | 0.567056216 | -0.437671 | 0.000369 | hypomethylated |
| cg02258534 | 0.72521 | 0.53542     | -0.437728 | 6.31E-05 | hypomethylated |
| cg21197796 | 0.75919 | 0.56048     | -0.437798 | 3.85E-05 | hypomethylated |
| cg08362283 | 0.69518 | 0.513208649 | -0.437841 | 3.62E-05 | hypomethylated |
| cg02653521 | 0.87145 | 0.643326486 | -0.437867 | 8.63E-05 | hypomethylated |
| cg22749855 | 0.69705 | 0.514557838 | -0.437929 | 0.000271 | hypomethylated |
| cg22583147 | 0.72985 | 0.538764865 | -0.437944 | 9.72E-05 | hypomethylated |
| cg09036996 | 0.57069 | 0.421266486 | -0.437974 | 0.0003   | hypomethylated |
| cg08696192 | 0.86246 | 0.636624865 | -0.438014 | 4.18E-06 | hypomethylated |
| cg25348105 | 0.59525 | 0.43938     | -0.438027 | 0.000931 | hypomethylated |
| cg16451803 | 0.63872 | 0.471454054 | -0.438066 | 0.000293 | hypomethylated |
| cg27292264 | 0.48407 | 0.357296757 | -0.438093 | 5.25E-05 | hypomethylated |
| cg09432154 | 0.63616 | 0.469536757 | -0.438152 | 2.71E-05 | hypomethylated |



|            |         |             |           |          |                |
|------------|---------|-------------|-----------|----------|----------------|
| cg22887880 | 0.74095 | 0.546873514 | -0.438169 | 2.57E-05 | hypomethylated |
| cg16452248 | 0.95939 | 0.708062703 | -0.43824  | 1.15E-06 | hypomethylated |
| cg01670771 | 0.72835 | 0.537541081 | -0.438257 | 5.19E-05 | hypomethylated |
| cg08737189 | 0.77494 | 0.571904865 | -0.438309 | 1.66E-05 | hypomethylated |
| cg05903710 | 0.7157  | 0.52814973  | -0.438408 | 0.000166 | hypomethylated |
| cg00507135 | 0.84186 | 0.621236757 | -0.438437 | 4.76E-05 | hypomethylated |
| cg13705556 | 0.79838 | 0.589149189 | -0.438443 | 3.62E-05 | hypomethylated |
| cg14754494 | 0.8019  | 0.591676216 | -0.438614 | 4.10E-05 | hypomethylated |
| cg16073143 | 0.81714 | 0.602861622 | -0.438756 | 9.72E-05 | hypomethylated |
| cg18432572 | 0.74629 | 0.550578919 | -0.438787 | 3.69E-06 | hypomethylated |
| cg18161025 | 0.78486 | 0.579027568 | -0.438803 | 9.57E-06 | hypomethylated |
| cg06294416 | 0.82518 | 0.608728649 | -0.43891  | 6.05E-06 | hypomethylated |
| cg02928885 | 0.83334 | 0.614722703 | -0.438969 | 5.93E-05 | hypomethylated |
| cg26834627 | 0.86056 | 0.634751892 | -0.439083 | 1.89E-05 | hypomethylated |
| cg01927000 | 0.87337 | 0.644197838 | -0.439089 | 1.01E-05 | hypomethylated |
| cg11726507 | 0.82485 | 0.608387568 | -0.439141 | 0.000262 | hypomethylated |
| cg23778358 | 0.9688  | 0.714559459 | -0.439145 | 9.24E-07 | hypomethylated |
| cg17747879 | 0.55339 | 0.408157297 | -0.439171 | 0.00028  | hypomethylated |
| cg03795574 | 0.74295 | 0.547945946 | -0.439232 | 0.000756 | hypomethylated |
| cg10965749 | 0.63334 | 0.467105405 | -0.439232 | 2.39E-05 | hypomethylated |
| cg04519870 | 0.66086 | 0.487400541 | -0.439237 | 1.84E-05 | hypomethylated |
| cg08391380 | 0.92097 | 0.679225946 | -0.439263 | 1.58E-06 | hypomethylated |
| cg18174530 | 0.68231 | 0.503210811 | -0.439264 | 4.01E-06 | hypomethylated |
| cg05312962 | 0.64775 | 0.477719459 | -0.439273 | 0.000174 | hypomethylated |
| cg07443717 | 0.80106 | 0.590734595 | -0.4394   | 2.64E-05 | hypomethylated |
| cg25128781 | 0.5516  | 0.40676973  | -0.43941  | 0.000324 | hypomethylated |
| cg05695995 | 0.51287 | 0.378192432 | -0.439473 | 2.96E-05 | hypomethylated |
| cg20668765 | 0.61543 | 0.453817838 | -0.439481 | 5.65E-05 | hypomethylated |
| cg01473602 | 0.51851 | 0.382342162 | -0.439508 | 0.000718 | hypomethylated |
| cg22445712 | 0.54993 | 0.405497838 | -0.439554 | 0.000293 | hypomethylated |
| cg02724909 | 0.65267 | 0.481252432 | -0.43956  | 1.75E-05 | hypomethylated |
| cg13405631 | 0.5215  | 0.384531892 | -0.439564 | 0.001571 | hypomethylated |
| cg03015585 | 0.91168 | 0.672225405 | -0.439582 | 2.29E-06 | hypomethylated |
| cg23985447 | 0.69392 | 0.511647568 | -0.439619 | 0.002066 | hypomethylated |
| cg06221946 | 0.68043 | 0.501653514 | -0.439755 | 0.000417 | hypomethylated |
| cg01034813 | 0.7855  | 0.579105946 | -0.439784 | 4.10E-05 | hypomethylated |
| cg27404351 | 0.67718 | 0.499241622 | -0.439801 | 6.78E-05 | hypomethylated |
| cg09636245 | 0.61942 | 0.456654054 | -0.439816 | 0.003078 | hypomethylated |
| cg05138403 | 0.83166 | 0.613111351 | -0.439845 | 8.42E-05 | hypomethylated |
| cg01300852 | 0.65929 | 0.486034595 | -0.439854 | 0.00039  | hypomethylated |
| cg05504025 | 0.72563 | 0.534934054 | -0.439873 | 6.39E-06 | hypomethylated |
| cg08608523 | 0.60978 | 0.449529189 | -0.439874 | 1.54E-05 | hypomethylated |
| cg13158199 | 0.84441 | 0.622494054 | -0.439884 | 3.04E-06 | hypomethylated |
| cg16738984 | 0.64205 | 0.473287568 | -0.439969 | 1.89E-05 | hypomethylated |
| cg07701049 | 0.80138 | 0.590703784 | -0.440052 | 2.71E-05 | hypomethylated |
| cg24974982 | 0.68366 | 0.503901081 | -0.440138 | 0.000262 | hypomethylated |
| cg16527877 | 0.74751 | 0.550938919 | -0.4402   | 0.00015  | hypomethylated |
| cg11800672 | 0.78453 | 0.578207568 | -0.440241 | 0.000313 | hypomethylated |
| cg16090599 | 0.53488 | 0.394194054 | -0.440309 | 7.84E-05 | hypomethylated |
| cg01869342 | 0.88294 | 0.650703784 | -0.440314 | 2.67E-05 | hypomethylated |
| cg24097814 | 0.88479 | 0.652067027 | -0.440315 | 1.52E-05 | hypomethylated |
| cg11411884 | 0.9379  | 0.691191892 | -0.440348 | 6.05E-06 | hypomethylated |
| cg09146232 | 0.91202 | 0.672072432 | -0.440449 | 2.49E-06 | hypomethylated |
| cg19450056 | 0.79763 | 0.587747568 | -0.440523 | 3.40E-05 | hypomethylated |
| cg19573490 | 0.75642 | 0.557316757 | -0.44069  | 0.000166 | hypomethylated |
| cg11069071 | 0.74151 | 0.54630973  | -0.440747 | 1.18E-05 | hypomethylated |
| cg18819791 | 0.74477 | 0.548661622 | -0.440878 | 0.000234 | hypomethylated |
| cg14301030 | 0.83642 | 0.616159459 | -0.440924 | 1.39E-05 | hypomethylated |

|            |         |             |           |          |                |
|------------|---------|-------------|-----------|----------|----------------|
| cg06295784 | 0.7763  | 0.571818919 | -0.441056 | 2.87E-06 | hypomethylated |
| cg18508425 | 0.63341 | 0.466558919 | -0.44108  | 3.76E-05 | hypomethylated |
| cg01252713 | 0.8653  | 0.637328649 | -0.441163 | 5.50E-06 | hypomethylated |
| cg23172911 | 0.70169 | 0.516801622 | -0.441223 | 0.00035  | hypomethylated |
| cg14575790 | 0.81062 | 0.597025946 | -0.441232 | 1.39E-05 | hypomethylated |
| cg02780210 | 0.50792 | 0.374077838 | -0.441263 | 0.000454 | hypomethylated |
| cg16294363 | 0.77909 | 0.573698919 | -0.441496 | 4.15E-05 | hypomethylated |
| cg23822312 | 0.81935 | 0.603321081 | -0.441554 | 2.87E-06 | hypomethylated |
| cg25907138 | 0.55493 | 0.408614595 | -0.441565 | 3.85E-05 | hypomethylated |
| cg08090621 | 0.74331 | 0.547303243 | -0.441624 | 0.000129 | hypomethylated |
| cg09678829 | 0.89251 | 0.657137838 | -0.441672 | 4.86E-06 | hypomethylated |
| cg08821747 | 0.75293 | 0.554358919 | -0.441695 | 2.78E-05 | hypomethylated |
| cg05412410 | 0.71557 | 0.526783243 | -0.441883 | 8.84E-05 | hypomethylated |
| cg25840173 | 0.76133 | 0.560454595 | -0.441924 | 4.15E-05 | hypomethylated |
| cg14673936 | 0.72046 | 0.530334054 | -0.442017 | 5.65E-06 | hypomethylated |
| cg20092936 | 0.93255 | 0.686437297 | -0.442053 | 3.95E-05 | hypomethylated |
| cg02639435 | 0.93575 | 0.68879027  | -0.442058 | 1.23E-05 | hypomethylated |
| cg25481157 | 0.61663 | 0.453877297 | -0.442103 | 0.000613 | hypomethylated |
| cg11801110 | 0.63906 | 0.470362703 | -0.442178 | 7.74E-05 | hypomethylated |
| cg16147544 | 0.71223 | 0.524200541 | -0.442224 | 3.59E-06 | hypomethylated |
| cg15677087 | 0.82877 | 0.609956216 | -0.442266 | 0.000563 | hypomethylated |
| cg16269010 | 0.52046 | 0.383037297 | -0.442302 | 6.39E-06 | hypomethylated |
| cg26351966 | 0.43606 | 0.320902162 | -0.442393 | 0.002649 | hypomethylated |
| cg00112314 | 0.56287 | 0.414223243 | -0.442393 | 0.000126 | hypomethylated |
| cg05765734 | 0.85721 | 0.630826486 | -0.442405 | 2.21E-05 | hypomethylated |
| cg27423177 | 0.64418 | 0.474043243 | -0.442445 | 0.000469 | hypomethylated |
| cg25668117 | 0.84586 | 0.622447568 | -0.442467 | 4.48E-06 | hypomethylated |
| cg00508965 | 0.77314 | 0.568925946 | -0.442489 | 9.69E-06 | hypomethylated |
| cg24764810 | 0.71502 | 0.526155676 | -0.442494 | 2.71E-05 | hypomethylated |
| cg00869330 | 0.80577 | 0.592921081 | -0.442528 | 0.000102 | hypomethylated |
| cg10891521 | 0.65002 | 0.47830973  | -0.442539 | 4.88E-05 | hypomethylated |
| cg14407179 | 0.82145 | 0.604353514 | -0.44278  | 0.000866 | hypomethylated |
| cg03981685 | 0.75072 | 0.552296216 | -0.442833 | 0.000667 | hypomethylated |
| cg03631656 | 0.62351 | 0.458706486 | -0.442841 | 0.00095  | hypomethylated |
| cg08866557 | 0.85512 | 0.629096757 | -0.442845 | 2.85E-05 | hypomethylated |
| cg00966920 | 0.83003 | 0.610625405 | -0.442876 | 7.12E-05 | hypomethylated |
| cg09539496 | 0.67293 | 0.495046486 | -0.442892 | 0.000474 | hypomethylated |
| cg15948030 | 0.60873 | 0.447773514 | -0.443033 | 0.00035  | hypomethylated |
| cg15736553 | 0.51906 | 0.38180973  | -0.443047 | 9.27E-05 | hypomethylated |
| cg01152374 | 0.80068 | 0.588957297 | -0.443063 | 2.92E-05 | hypomethylated |
| cg00077904 | 0.52756 | 0.388035135 | -0.443148 | 3.49E-05 | hypomethylated |
| cg13650740 | 0.55943 | 0.411472973 | -0.44316  | 0.000342 | hypomethylated |
| cg07945582 | 0.74782 | 0.550034595 | -0.443169 | 0.000129 | hypomethylated |
| cg16850150 | 0.4693  | 0.345177297 | -0.443173 | 4.47E-05 | hypomethylated |
| cg06761584 | 0.77057 | 0.566755135 | -0.4432   | 1.84E-05 | hypomethylated |
| cg13630114 | 0.80434 | 0.591556757 | -0.443289 | 5.45E-05 | hypomethylated |
| cg21147708 | 0.70393 | 0.517700541 | -0.443314 | 0.000161 | hypomethylated |
| cg10208113 | 0.87834 | 0.645951892 | -0.443353 | 4.12E-06 | hypomethylated |
| cg10449466 | 0.69703 | 0.5126      | -0.443387 | 0.000174 | hypomethylated |
| cg15726025 | 0.86817 | 0.638434054 | -0.44344  | 7.32E-06 | hypomethylated |
| cg01810863 | 0.44625 | 0.328107568 | -0.443683 | 0.000123 | hypomethylated |
| cg01974549 | 0.79714 | 0.586072973 | -0.443753 | 2.78E-05 | hypomethylated |
| cg25407876 | 0.6455  | 0.474582162 | -0.443759 | 0.000469 | hypomethylated |
| cg24278841 | 0.76836 | 0.564886486 | -0.443821 | 4.12E-06 | hypomethylated |
| cg22914057 | 0.87552 | 0.643657297 | -0.443847 | 1.99E-06 | hypomethylated |
| cg14065109 | 0.64214 | 0.472082703 | -0.443848 | 0.001571 | hypomethylated |
| cg14651650 | 0.80593 | 0.592491351 | -0.44386  | 4.15E-05 | hypomethylated |
| cg09180877 | 0.71151 | 0.523067568 | -0.443887 | 4.60E-06 | hypomethylated |

|            |         |             |           |          |                |
|------------|---------|-------------|-----------|----------|----------------|
| cg12003463 | 0.7791  | 0.572756216 | -0.443887 | 7.83E-06 | hypomethylated |
| cg07978738 | 0.54338 | 0.399427568 | -0.444028 | 0.000358 | hypomethylated |
| cg00238570 | 0.79769 | 0.586363784 | -0.444032 | 3.85E-05 | hypomethylated |
| cg22057234 | 0.39531 | 0.290567568 | -0.444111 | 8.94E-05 | hypomethylated |
| cg26701815 | 0.7471  | 0.549085405 | -0.444271 | 0.00017  | hypomethylated |
| cg06341100 | 0.80803 | 0.593855135 | -0.444298 | 7.20E-05 | hypomethylated |
| cg21189611 | 0.87951 | 0.646358378 | -0.444366 | 4.26E-05 | hypomethylated |
| cg19904905 | 0.77243 | 0.567654595 | -0.444391 | 0.000317 | hypomethylated |
| cg01008256 | 0.59861 | 0.439858919 | -0.444576 | 0.000365 | hypomethylated |
| cg01699293 | 0.90172 | 0.662573514 | -0.444599 | 3.30E-06 | hypomethylated |
| cg12475590 | 0.88672 | 0.651504865 | -0.444703 | 6.57E-06 | hypomethylated |
| cg10758902 | 0.94593 | 0.695007568 | -0.444705 | 3.39E-06 | hypomethylated |
| cg04770370 | 0.53416 | 0.392434054 | -0.444822 | 7.12E-06 | hypomethylated |
| cg15353533 | 0.7786  | 0.572012973 | -0.444834 | 1.37E-06 | hypomethylated |
| cg01647204 | 0.60487 | 0.444355676 | -0.44491  | 0.000229 | hypomethylated |
| cg00515905 | 0.86089 | 0.632408108 | -0.444973 | 5.00E-06 | hypomethylated |
| cg24599065 | 0.49091 | 0.360614595 | -0.445001 | 0.001635 | hypomethylated |
| cg20327784 | 0.69184 | 0.508186486 | -0.44508  | 1.75E-05 | hypomethylated |
| cg15809077 | 0.87362 | 0.641707568 | -0.44509  | 1.62E-05 | hypomethylated |
| cg01767862 | 0.86062 | 0.632138919 | -0.445135 | 3.39E-06 | hypomethylated |
| cg26147935 | 0.86535 | 0.635598919 | -0.445167 | 7.12E-05 | hypomethylated |
| cg18526870 | 0.81648 | 0.599668108 | -0.445253 | 1.75E-05 | hypomethylated |
| cg24755459 | 0.71255 | 0.523329189 | -0.445273 | 0.000176 | hypomethylated |
| cg15259904 | 0.78503 | 0.576492432 | -0.445446 | 0.000245 | hypomethylated |
| cg14405137 | 0.60746 | 0.44604973  | -0.445585 | 0.012637 | hypomethylated |
| cg25546428 | 0.8136  | 0.597402162 | -0.445617 | 9.07E-06 | hypomethylated |
| cg00127781 | 0.64975 | 0.47702     | -0.445835 | 1.15E-06 | hypomethylated |
| cg24667756 | 0.76797 | 0.563806486 | -0.44585  | 0.000237 | hypomethylated |
| cg19867579 | 0.66792 | 0.490345946 | -0.445875 | 0.003021 | hypomethylated |
| cg19777001 | 0.86381 | 0.634148108 | -0.445894 | 2.71E-05 | hypomethylated |
| cg27255275 | 0.71351 | 0.523807027 | -0.445898 | 0.000132 | hypomethylated |
| cg04022194 | 0.62777 | 0.460844865 | -0.445955 | 5.73E-06 | hypomethylated |
| cg21606527 | 0.72608 | 0.532976216 | -0.446057 | 7.12E-05 | hypomethylated |
| cg09692449 | 0.64068 | 0.470286486 | -0.446064 | 0.000163 | hypomethylated |
| cg18995788 | 0.87662 | 0.643455135 | -0.446112 | 0.000147 | hypomethylated |
| cg09773238 | 0.70673 | 0.518724324 | -0.446191 | 7.84E-05 | hypomethylated |
| cg10133725 | 0.72428 | 0.531571892 | -0.446283 | 0.000495 | hypomethylated |
| cg07573872 | 0.73578 | 0.539998919 | -0.446318 | 0.000224 | hypomethylated |
| cg03769927 | 0.76167 | 0.558949189 | -0.446449 | 0.000253 | hypomethylated |
| cg18555142 | 0.79926 | 0.586481081 | -0.44658  | 2.29E-06 | hypomethylated |
| cg02558476 | 0.57978 | 0.425416757 | -0.446629 | 0.00018  | hypomethylated |
| cg02286809 | 0.81201 | 0.595806486 | -0.446654 | 3.32E-05 | hypomethylated |
| cg13168012 | 0.50711 | 0.372087568 | -0.446657 | 6.54E-05 | hypomethylated |
| cg10005565 | 0.79526 | 0.583508649 | -0.446673 | 1.80E-05 | hypomethylated |
| cg23424357 | 0.84745 | 0.621800541 | -0.446676 | 2.42E-06 | hypomethylated |
| cg26688315 | 0.80242 | 0.588740541 | -0.446726 | 2.30E-05 | hypomethylated |
| cg12188416 | 0.67922 | 0.498346486 | -0.44673  | 0.002318 | hypomethylated |
| cg02589576 | 0.60112 | 0.441034054 | -0.446763 | 3.57E-05 | hypomethylated |
| cg02285155 | 0.72918 | 0.534975135 | -0.446803 | 0.000797 | hypomethylated |
| cg14079243 | 0.5628  | 0.412885946 | -0.446879 | 8.32E-05 | hypomethylated |
| cg14361654 | 0.62669 | 0.45974973  | -0.446903 | 2.32E-05 | hypomethylated |
| cg08836861 | 0.69884 | 0.512677297 | -0.446911 | 0.000129 | hypomethylated |
| cg15036326 | 0.73197 | 0.536979459 | -0.446918 | 0.00017  | hypomethylated |
| cg20108855 | 0.80532 | 0.590761081 | -0.446987 | 1.39E-05 | hypomethylated |
| cg13357821 | 0.73127 | 0.536433514 | -0.447005 | 9.31E-06 | hypomethylated |
| cg08755026 | 0.85899 | 0.630120541 | -0.447013 | 5.28E-06 | hypomethylated |
| cg10995381 | 0.67853 | 0.497735676 | -0.447033 | 2.27E-05 | hypomethylated |
| cg24700219 | 0.68982 | 0.505986486 | -0.447121 | 4.36E-05 | hypomethylated |

|            |         |             |           |          |                |
|------------|---------|-------------|-----------|----------|----------------|
| cg02001060 | 0.61912 | 0.454126486 | -0.447125 | 6.62E-05 | hypomethylated |
| cg01574788 | 0.58128 | 0.426364324 | -0.447147 | 0.0002   | hypomethylated |
| cg12800047 | 0.78092 | 0.57279027  | -0.447168 | 0.000224 | hypomethylated |
| cg07086226 | 0.76265 | 0.559340541 | -0.447294 | 4.88E-05 | hypomethylated |
| cg14778967 | 0.74563 | 0.546856757 | -0.447297 | 0.000485 | hypomethylated |
| cg00253228 | 0.50559 | 0.370805405 | -0.447306 | 0.003808 | hypomethylated |
| cg14505256 | 0.8338  | 0.611515135 | -0.447313 | 1.09E-05 | hypomethylated |
| cg18303608 | 0.66208 | 0.485558919 | -0.447359 | 0.000135 | hypomethylated |
| cg16754857 | 0.79912 | 0.586039459 | -0.447414 | 1.09E-05 | hypomethylated |
| cg18915450 | 0.86796 | 0.636521081 | -0.44742  | 2.64E-05 | hypomethylated |
| cg12743248 | 0.74535 | 0.546556757 | -0.447547 | 0.000112 | hypomethylated |
| cg15698244 | 0.76386 | 0.560111351 | -0.447595 | 1.01E-05 | hypomethylated |
| cg08498836 | 0.83079 | 0.609178378 | -0.447619 | 2.18E-05 | hypomethylated |
| cg24298696 | 0.88963 | 0.652316216 | -0.447634 | 2.64E-06 | hypomethylated |
| cg04510919 | 0.79432 | 0.582410811 | -0.447683 | 3.95E-05 | hypomethylated |
| cg18186672 | 0.66906 | 0.490563784 | -0.447695 | 0.003571 | hypomethylated |
| cg19414383 | 0.62361 | 0.457217297 | -0.447764 | 0.001571 | hypomethylated |
| cg21931317 | 0.92194 | 0.675930811 | -0.447797 | 8.15E-06 | hypomethylated |
| cg01452581 | 0.79176 | 0.580435676 | -0.447927 | 1.18E-06 | hypomethylated |
| cg21547649 | 0.50471 | 0.369985946 | -0.447984 | 0.000189 | hypomethylated |
| cg17481703 | 0.70538 | 0.51708     | -0.448013 | 0.000152 | hypomethylated |
| cg23330006 | 0.62601 | 0.458879459 | -0.44807  | 0.000772 | hypomethylated |
| cg14802951 | 0.63272 | 0.463795676 | -0.448078 | 1.12E-05 | hypomethylated |
| cg26557179 | 0.536   | 0.392894054 | -0.448093 | 0.006339 | hypomethylated |
| cg22384356 | 0.68942 | 0.505348649 | -0.448104 | 1.01E-05 | hypomethylated |
| cg12402318 | 0.74985 | 0.549641622 | -0.448111 | 1.94E-05 | hypomethylated |
| cg25863289 | 0.94679 | 0.693987568 | -0.448135 | 5.35E-06 | hypomethylated |
| cg24158844 | 0.49167 | 0.360388649 | -0.448137 | 0.002147 | hypomethylated |
| cg27302373 | 0.8418  | 0.617029189 | -0.448139 | 3.95E-05 | hypomethylated |
| cg13941508 | 0.91211 | 0.668535135 | -0.448204 | 3.85E-06 | hypomethylated |
| cg10075819 | 0.56525 | 0.414292432 | -0.44824  | 0.000166 | hypomethylated |
| cg15404785 | 0.51186 | 0.375152432 | -0.448272 | 0.000117 | hypomethylated |
| cg14313576 | 0.73483 | 0.538569189 | -0.448279 | 4.15E-05 | hypomethylated |
| cg18205883 | 0.94895 | 0.695473514 | -0.448337 | 3.49E-06 | hypomethylated |
| cg25531341 | 0.81412 | 0.596645946 | -0.448366 | 1.21E-05 | hypomethylated |
| cg25799589 | 0.656   | 0.480763243 | -0.448369 | 0.001541 | hypomethylated |
| cg06162324 | 0.80095 | 0.586971351 | -0.448422 | 4.12E-06 | hypomethylated |
| cg17397004 | 0.58179 | 0.42636     | -0.448426 | 0.00012  | hypomethylated |
| cg21345826 | 0.84458 | 0.618912973 | -0.448498 | 4.36E-06 | hypomethylated |
| cg15497006 | 0.61391 | 0.449874054 | -0.448506 | 0.005606 | hypomethylated |
| cg03049445 | 0.81113 | 0.594381622 | -0.448544 | 4.48E-06 | hypomethylated |
| cg07890553 | 0.58773 | 0.430654595 | -0.448622 | 0.000365 | hypomethylated |
| cg19257402 | 0.44102 | 0.32313027  | -0.448728 | 0.000135 | hypomethylated |
| cg26108621 | 0.73529 | 0.538724324 | -0.448766 | 0.00017  | hypomethylated |
| cg24180219 | 0.52563 | 0.385109189 | -0.44878  | 3.67E-05 | hypomethylated |
| cg02100150 | 0.74578 | 0.546392973 | -0.448811 | 6.31E-05 | hypomethylated |
| cg17629796 | 0.93654 | 0.68613027  | -0.448858 | 3.15E-05 | hypomethylated |
| cg26968025 | 0.8204  | 0.601040541 | -0.448865 | 4.24E-06 | hypomethylated |
| cg26586843 | 0.60582 | 0.443804324 | -0.448965 | 0.000265 | hypomethylated |
| cg06242449 | 0.4685  | 0.343205946 | -0.448975 | 0.000191 | hypomethylated |
| cg18866792 | 0.76632 | 0.561373514 | -0.448986 | 1.99E-05 | hypomethylated |
| cg00328219 | 0.67121 | 0.491687568 | -0.449022 | 9.57E-06 | hypomethylated |
| cg21487856 | 0.65089 | 0.476787568 | -0.449067 | 0.000805 | hypomethylated |
| cg08459746 | 0.82219 | 0.60222973  | -0.449158 | 2.56E-06 | hypomethylated |
| cg02958014 | 0.75764 | 0.554947027 | -0.449162 | 1.37E-05 | hypomethylated |
| cg11580676 | 0.88452 | 0.647864865 | -0.449202 | 3.17E-06 | hypomethylated |
| cg16356737 | 0.78643 | 0.576017297 | -0.449206 | 5.86E-05 | hypomethylated |
| cg21498475 | 0.56744 | 0.415618378 | -0.449208 | 0.000116 | hypomethylated |

|            |         |             |           |          |                |
|------------|---------|-------------|-----------|----------|----------------|
| cg00857862 | 0.80597 | 0.590322162 | -0.449224 | 0.000107 | hypomethylated |
| cg02723617 | 0.53307 | 0.390426486 | -0.449274 | 0.000209 | hypomethylated |
| cg22789714 | 0.37485 | 0.274525405 | -0.449374 | 0.000674 | hypomethylated |
| cg19009305 | 0.60653 | 0.444195135 | -0.449385 | 2.39E-05 | hypomethylated |
| cg07348300 | 0.48675 | 0.356452973 | -0.449469 | 7.12E-06 | hypomethylated |
| cg10028434 | 0.66217 | 0.484905946 | -0.449497 | 1.01E-05 | hypomethylated |
| cg07143158 | 0.87418 | 0.640152973 | -0.449514 | 1.46E-05 | hypomethylated |
| cg04561791 | 0.57688 | 0.422436216 | -0.449538 | 7.29E-05 | hypomethylated |
| cg18665334 | 0.60098 | 0.440076757 | -0.449562 | 0.000633 | hypomethylated |
| cg10172675 | 0.55384 | 0.405520541 | -0.449694 | 0.000358 | hypomethylated |
| cg18317531 | 0.89249 | 0.653457297 | -0.449743 | 3.08E-06 | hypomethylated |
| cg26319827 | 0.83872 | 0.614077297 | -0.449769 | 7.93E-06 | hypomethylated |
| cg25526061 | 0.694   | 0.508090811 | -0.449849 | 0.0017   | hypomethylated |
| cg24544082 | 0.8124  | 0.594760541 | -0.449881 | 0.000306 | hypomethylated |
| cg10294820 | 0.65174 | 0.477094595 | -0.450021 | 5.72E-05 | hypomethylated |
| cg05609780 | 0.90986 | 0.666042162 | -0.450031 | 2.10E-06 | hypomethylated |
| cg12985065 | 0.57425 | 0.420349189 | -0.450091 | 4.36E-06 | hypomethylated |
| cg25783892 | 0.87318 | 0.639158378 | -0.450106 | 5.28E-06 | hypomethylated |
| cg01782097 | 0.42993 | 0.314684324 | -0.450196 | 0.000245 | hypomethylated |
| cg11476241 | 0.73376 | 0.537054595 | -0.45024  | 0.000839 | hypomethylated |
| cg05977376 | 0.56896 | 0.41642973  | -0.450254 | 0.000268 | hypomethylated |
| cg12562828 | 0.5657  | 0.413971892 | -0.450504 | 0.000259 | hypomethylated |
| cg21621782 | 0.68128 | 0.498547568 | -0.450517 | 5.86E-05 | hypomethylated |
| cg14871010 | 0.84339 | 0.617172432 | -0.450526 | 4.01E-06 | hypomethylated |
| cg02584867 | 0.70444 | 0.515489189 | -0.450535 | 6.93E-06 | hypomethylated |
| cg09359810 | 0.77522 | 0.567282703 | -0.450538 | 0.000229 | hypomethylated |
| cg07824422 | 0.63764 | 0.466597297 | -0.450564 | 0.00035  | hypomethylated |
| cg02042997 | 0.59493 | 0.435330811 | -0.450608 | 0.003637 | hypomethylated |
| cg01483139 | 0.80358 | 0.588003243 | -0.450618 | 0.000756 | hypomethylated |
| cg12170787 | 0.5983  | 0.437785405 | -0.450645 | 0.000667 | hypomethylated |
| cg04396850 | 0.79299 | 0.580233514 | -0.450669 | 8.03E-05 | hypomethylated |
| cg00966557 | 0.75125 | 0.54968     | -0.450701 | 5.43E-06 | hypomethylated |
| cg03651219 | 0.91518 | 0.669618378 | -0.450716 | 1.66E-05 | hypomethylated |
| cg26050975 | 0.66898 | 0.48947027  | -0.450742 | 0.004287 | hypomethylated |
| cg07397616 | 0.62646 | 0.458315676 | -0.450881 | 7.93E-05 | hypomethylated |
| cg07097725 | 0.77562 | 0.567429189 | -0.45091  | 9.72E-05 | hypomethylated |
| cg27639613 | 0.83819 | 0.613142703 | -0.451054 | 0.00012  | hypomethylated |
| cg13247117 | 0.69416 | 0.507771351 | -0.451089 | 2.81E-05 | hypomethylated |
| cg00967711 | 0.78505 | 0.574255676 | -0.451091 | 8.03E-05 | hypomethylated |
| cg02012483 | 0.7962  | 0.582349189 | -0.451246 | 8.15E-06 | hypomethylated |
| cg16536610 | 0.91172 | 0.666801622 | -0.451333 | 1.49E-06 | hypomethylated |
| cg05334655 | 0.63435 | 0.46391027  | -0.451433 | 4.94E-05 | hypomethylated |
| cg17259265 | 0.86864 | 0.635236757 | -0.451464 | 4.42E-05 | hypomethylated |
| cg21106695 | 0.88797 | 0.64936973  | -0.451471 | 8.26E-06 | hypomethylated |
| cg16672203 | 0.72007 | 0.526563243 | -0.45153  | 4.26E-05 | hypomethylated |
| cg12446045 | 0.77045 | 0.563359459 | -0.451646 | 1.89E-05 | hypomethylated |
| cg06602478 | 0.87652 | 0.640916757 | -0.45165  | 6.57E-06 | hypomethylated |
| cg26775695 | 0.81759 | 0.597798919 | -0.451717 | 8.60E-06 | hypomethylated |
| cg02280644 | 0.53837 | 0.393638378 | -0.451727 | 3.85E-05 | hypomethylated |
| cg03274800 | 0.87684 | 0.6411      | -0.451764 | 9.31E-06 | hypomethylated |
| cg26164488 | 0.7961  | 0.582065946 | -0.451767 | 0.000426 | hypomethylated |
| cg01020774 | 0.8169  | 0.597243784 | -0.45184  | 1.04E-05 | hypomethylated |
| cg27300194 | 0.36479 | 0.266700541 | -0.451845 | 0.00032  | hypomethylated |
| cg21103992 | 0.83989 | 0.614048649 | -0.451847 | 0.000187 | hypomethylated |
| cg18580385 | 0.87393 | 0.638890811 | -0.451948 | 6.93E-06 | hypomethylated |
| cg06935608 | 0.6298  | 0.460413514 | -0.451964 | 0.000129 | hypomethylated |
| cg15859390 | 0.72203 | 0.527827027 | -0.451994 | 9.95E-05 | hypomethylated |
| cg10661002 | 0.89461 | 0.653977297 | -0.452018 | 4.73E-06 | hypomethylated |

|            |         |             |           |          |                |
|------------|---------|-------------|-----------|----------|----------------|
| cg13505393 | 0.5213  | 0.381076757 | -0.452032 | 0.004863 | hypomethylated |
| cg13791379 | 0.82566 | 0.603563243 | -0.452043 | 7.12E-06 | hypomethylated |
| cg03926640 | 0.66608 | 0.486894595 | -0.452086 | 1.18E-05 | hypomethylated |
| cg23017002 | 0.80355 | 0.587379459 | -0.452095 | 3.07E-05 | hypomethylated |
| cg09880665 | 0.63194 | 0.461891892 | -0.452232 | 0.000107 | hypomethylated |
| cg00563495 | 0.57752 | 0.422091351 | -0.452316 | 8.73E-05 | hypomethylated |
| cg14476212 | 0.7973  | 0.582717838 | -0.452325 | 4.15E-05 | hypomethylated |
| cg24278165 | 0.94122 | 0.687900541 | -0.452332 | 8.15E-06 | hypomethylated |
| cg10090591 | 0.85563 | 0.625334054 | -0.45236  | 4.26E-05 | hypomethylated |
| cg05199904 | 0.73692 | 0.538571892 | -0.452369 | 0.000262 | hypomethylated |
| cg04261496 | 0.69611 | 0.508739459 | -0.452388 | 0.005316 | hypomethylated |
| cg25986240 | 0.55595 | 0.406302162 | -0.452402 | 6.54E-05 | hypomethylated |
| cg04089788 | 0.39688 | 0.290035135 | -0.452475 | 0.000107 | hypomethylated |
| cg16600733 | 0.94983 | 0.694121081 | -0.452482 | 1.40E-05 | hypomethylated |
| cg22059438 | 0.74247 | 0.542543784 | -0.452593 | 8.22E-05 | hypomethylated |
| cg10560420 | 0.82322 | 0.601540541 | -0.452616 | 4.86E-06 | hypomethylated |
| cg07556261 | 0.63491 | 0.463938378 | -0.452619 | 4.47E-05 | hypomethylated |
| cg17079987 | 0.79454 | 0.580577297 | -0.452632 | 0.000506 | hypomethylated |
| cg16851482 | 0.64141 | 0.468681081 | -0.45264  | 0.0003   | hypomethylated |
| cg25619717 | 0.85984 | 0.628281622 | -0.452657 | 2.29E-06 | hypomethylated |
| cg24441324 | 0.8204  | 0.59944973  | -0.452689 | 0.000214 | hypomethylated |
| cg00264419 | 0.59872 | 0.437443243 | -0.452786 | 0.00044  | hypomethylated |
| cg03481488 | 0.82677 | 0.604045946 | -0.452828 | 1.82E-06 | hypomethylated |
| cg20424311 | 0.65166 | 0.476105946 | -0.452837 | 8.84E-05 | hypomethylated |
| cg11384014 | 0.64775 | 0.473248108 | -0.45284  | 6.66E-06 | hypomethylated |
| cg19036773 | 0.59233 | 0.432741622 | -0.452895 | 5.19E-05 | hypomethylated |
| cg07134252 | 0.76279 | 0.557236216 | -0.452997 | 2.10E-05 | hypomethylated |
| cg03602014 | 0.63103 | 0.460964324 | -0.453053 | 0.000931 | hypomethylated |
| cg22079077 | 0.56993 | 0.416269189 | -0.453268 | 0.000274 | hypomethylated |
| cg26496628 | 0.64849 | 0.473631351 | -0.45332  | 0.000253 | hypomethylated |
| cg07409471 | 0.85006 | 0.620843243 | -0.453336 | 8.63E-05 | hypomethylated |
| cg11206634 | 0.68917 | 0.503277297 | -0.453506 | 0.000234 | hypomethylated |
| cg01588581 | 0.6632  | 0.484304865 | -0.453529 | 0.000148 | hypomethylated |
| cg26107033 | 0.83237 | 0.60780973  | -0.453605 | 4.58E-05 | hypomethylated |
| cg00179940 | 0.69795 | 0.509638378 | -0.45365  | 8.73E-05 | hypomethylated |
| cg06705122 | 0.54991 | 0.401536757 | -0.453663 | 0.000107 | hypomethylated |
| cg15263682 | 0.78198 | 0.570980541 | -0.45369  | 1.58E-06 | hypomethylated |
| cg18410110 | 0.76489 | 0.558472973 | -0.453765 | 5.00E-05 | hypomethylated |
| cg15620905 | 0.69698 | 0.508872973 | -0.453812 | 0.000117 | hypomethylated |
| cg14997942 | 0.91294 | 0.666517838 | -0.453877 | 3.21E-06 | hypomethylated |
| cg12179658 | 0.60201 | 0.439487568 | -0.453965 | 8.03E-05 | hypomethylated |
| cg07892167 | 0.69655 | 0.508495676 | -0.453991 | 0.002856 | hypomethylated |
| cg00808492 | 0.91513 | 0.668059459 | -0.454    | 2.16E-06 | hypomethylated |
| cg08939394 | 0.67579 | 0.493325405 | -0.454035 | 0.001667 | hypomethylated |
| cg06438797 | 0.63856 | 0.466135676 | -0.454072 | 1.75E-05 | hypomethylated |
| cg00418071 | 0.65376 | 0.477230811 | -0.454074 | 0.000287 | hypomethylated |
| cg24599650 | 0.57633 | 0.420699459 | -0.454105 | 0.000117 | hypomethylated |
| cg05504759 | 0.48187 | 0.351747027 | -0.454106 | 0.006015 | hypomethylated |
| cg02516845 | 0.70565 | 0.515078919 | -0.454159 | 5.45E-05 | hypomethylated |
| cg14352298 | 0.49765 | 0.363247027 | -0.45418  | 6.31E-05 | hypomethylated |
| cg01738406 | 0.58394 | 0.426192973 | -0.454313 | 0.000163 | hypomethylated |
| cg26689934 | 0.73684 | 0.537774054 | -0.454351 | 7.47E-05 | hypomethylated |
| cg20518497 | 0.8358  | 0.609937838 | -0.454496 | 1.49E-06 | hypomethylated |
| cg19534021 | 0.66383 | 0.484427027 | -0.454534 | 0.000119 | hypomethylated |
| cg14664316 | 0.73169 | 0.533942703 | -0.454548 | 6.01E-05 | hypomethylated |
| cg14752525 | 0.64557 | 0.471094595 | -0.454557 | 0.000214 | hypomethylated |
| cg16922937 | 0.76982 | 0.561763784 | -0.454558 | 0.000756 | hypomethylated |
| cg13603551 | 0.70896 | 0.517347568 | -0.45457  | 3.07E-05 | hypomethylated |

|            |         |             |           |          |                |
|------------|---------|-------------|-----------|----------|----------------|
| cg26325867 | 0.52432 | 0.382596216 | -0.454625 | 2.27E-05 | hypomethylated |
| cg12382557 | 0.92078 | 0.671891892 | -0.454627 | 8.60E-06 | hypomethylated |
| cg00741986 | 0.62572 | 0.456576216 | -0.454662 | 0.000696 | hypomethylated |
| cg27500292 | 0.6929  | 0.505595676 | -0.454663 | 3.67E-05 | hypomethylated |
| cg21244322 | 0.6221  | 0.453913514 | -0.454729 | 0.003506 | hypomethylated |
| cg08641990 | 0.76199 | 0.555943243 | -0.454834 | 0.0003   | hypomethylated |
| cg02862467 | 0.80493 | 0.58725027  | -0.454888 | 0.00024  | hypomethylated |
| cg14885762 | 0.55697 | 0.406344865 | -0.454895 | 0.00012  | hypomethylated |
| cg11746651 | 0.76062 | 0.554884324 | -0.454989 | 5.86E-05 | hypomethylated |
| cg23057567 | 0.57437 | 0.419011892 | -0.454989 | 0.000189 | hypomethylated |
| cg22136020 | 0.51981 | 0.379208108 | -0.454995 | 0.002409 | hypomethylated |
| cg19440734 | 0.7032  | 0.512970811 | -0.455058 | 0.001262 | hypomethylated |
| cg18188916 | 0.80561 | 0.587672973 | -0.455068 | 0.000358 | hypomethylated |
| cg06571687 | 0.52723 | 0.384583784 | -0.455135 | 0.000374 | hypomethylated |
| cg19064302 | 0.78847 | 0.575100541 | -0.455242 | 9.72E-05 | hypomethylated |
| cg17672850 | 0.39093 | 0.285136757 | -0.455256 | 5.58E-05 | hypomethylated |
| cg16753939 | 0.73833 | 0.538494595 | -0.455334 | 4.94E-05 | hypomethylated |
| cg09991092 | 0.66835 | 0.487435135 | -0.455394 | 2.85E-05 | hypomethylated |
| cg15885043 | 0.73072 | 0.532908649 | -0.45543  | 3.59E-06 | hypomethylated |
| cg16611234 | 0.39856 | 0.290631351 | -0.455607 | 0.000145 | hypomethylated |
| cg15944459 | 0.80276 | 0.585374595 | -0.455609 | 1.15E-05 | hypomethylated |
| cg10409560 | 0.88458 | 0.64502     | -0.455649 | 9.82E-06 | hypomethylated |
| cg24141382 | 0.44821 | 0.326825405 | -0.455655 | 0.00028  | hypomethylated |
| cg02145220 | 0.72265 | 0.526917838 | -0.455719 | 0.000102 | hypomethylated |
| cg11608390 | 0.78797 | 0.574511892 | -0.455804 | 0.000117 | hypomethylated |
| cg18698431 | 0.73098 | 0.532948649 | -0.455835 | 0.000174 | hypomethylated |
| cg09688127 | 0.78365 | 0.571328108 | -0.45589  | 0.000335 | hypomethylated |
| cg11165391 | 0.687   | 0.500864324 | -0.45589  | 0.000145 | hypomethylated |
| cg12322672 | 0.66146 | 0.482242703 | -0.455895 | 8.22E-05 | hypomethylated |
| cg02774282 | 0.68775 | 0.50135027  | -0.456065 | 0.000148 | hypomethylated |
| cg04494791 | 0.5448  | 0.397134054 | -0.456101 | 8.42E-05 | hypomethylated |
| cg07989851 | 0.64512 | 0.470231351 | -0.456197 | 0.000517 | hypomethylated |
| cg10091265 | 0.53603 | 0.390711892 | -0.456209 | 6.01E-05 | hypomethylated |
| cg24477401 | 0.61636 | 0.449254054 | -0.456242 | 0.000912 | hypomethylated |
| cg02147126 | 0.68765 | 0.501185946 | -0.456328 | 0.000182 | hypomethylated |
| cg14240304 | 0.70685 | 0.515178919 | -0.456331 | 4.80E-06 | hypomethylated |
| cg08012275 | 0.95521 | 0.696156757 | -0.456406 | 2.29E-06 | hypomethylated |
| cg14196507 | 0.86557 | 0.630825405 | -0.45641  | 1.28E-05 | hypomethylated |
| cg02980249 | 0.675   | 0.491874054 | -0.456599 | 5.19E-05 | hypomethylated |
| cg04169483 | 0.73726 | 0.537202162 | -0.456708 | 0.00028  | hypomethylated |
| cg17085710 | 0.6306  | 0.459474595 | -0.45674  | 4.26E-05 | hypomethylated |
| cg14598846 | 0.64071 | 0.46684     | -0.456743 | 5.58E-05 | hypomethylated |
| cg14046640 | 0.77635 | 0.565639459 | -0.456824 | 8.60E-06 | hypomethylated |
| cg27179693 | 0.58746 | 0.428013514 | -0.456834 | 0.000495 | hypomethylated |
| cg26169991 | 0.67817 | 0.494098378 | -0.456849 | 0.000214 | hypomethylated |
| cg27006169 | 0.86813 | 0.632480541 | -0.45689  | 8.63E-05 | hypomethylated |
| cg24618387 | 0.84488 | 0.615504324 | -0.456977 | 9.57E-06 | hypomethylated |
| cg12771187 | 0.71482 | 0.520751351 | -0.456985 | 0.000681 | hypomethylated |
| cg07069934 | 0.65213 | 0.475011892 | -0.457196 | 0.00028  | hypomethylated |
| cg11783497 | 0.59587 | 0.434014595 | -0.457254 | 0.0003   | hypomethylated |
| cg18950952 | 0.54115 | 0.394147568 | -0.457293 | 0.000382 | hypomethylated |
| cg08802944 | 0.72251 | 0.526236216 | -0.457307 | 0.000293 | hypomethylated |
| cg06706068 | 0.61372 | 0.446985946 | -0.457351 | 0.001987 | hypomethylated |
| cg17421241 | 0.7423  | 0.540616757 | -0.457396 | 6.93E-06 | hypomethylated |
| cg13520525 | 0.75661 | 0.551022162 | -0.457439 | 2.57E-05 | hypomethylated |
| cg03607644 | 0.91113 | 0.663536216 | -0.457482 | 1.49E-06 | hypomethylated |
| cg20821276 | 0.54219 | 0.394818919 | -0.457607 | 0.000165 | hypomethylated |
| cg14031473 | 0.53867 | 0.39224973  | -0.457629 | 0.000232 | hypomethylated |

|            |         |             |           |          |                |
|------------|---------|-------------|-----------|----------|----------------|
| cg05457221 | 0.64325 | 0.468390811 | -0.457667 | 0.000551 | hypomethylated |
| cg11783815 | 0.77158 | 0.561804324 | -0.457748 | 3.95E-06 | hypomethylated |
| cg11469587 | 0.5988  | 0.435990811 | -0.457776 | 8.42E-05 | hypomethylated |
| cg01565584 | 0.88527 | 0.644543243 | -0.45784  | 5.28E-06 | hypomethylated |
| cg01442005 | 0.84241 | 0.613327027 | -0.457866 | 4.47E-05 | hypomethylated |
| cg16017979 | 0.87284 | 0.635456216 | -0.457924 | 2.51E-05 | hypomethylated |
| cg26955845 | 0.66224 | 0.482116216 | -0.457973 | 0.001987 | hypomethylated |
| cg15754878 | 0.86035 | 0.626324865 | -0.458013 | 5.06E-05 | hypomethylated |
| cg15726557 | 0.72258 | 0.526029189 | -0.458014 | 1.99E-06 | hypomethylated |
| cg19544434 | 0.54781 | 0.398785946 | -0.458061 | 0.000338 | hypomethylated |
| cg02571534 | 0.54144 | 0.394125946 | -0.458145 | 2.45E-05 | hypomethylated |
| cg21198586 | 0.51912 | 0.377838378 | -0.458299 | 0.000464 | hypomethylated |
| cg05541460 | 0.83975 | 0.611193514 | -0.458331 | 1.40E-05 | hypomethylated |
| cg26484108 | 0.68948 | 0.501813514 | -0.458357 | 0.000256 | hypomethylated |
| cg14341131 | 0.64856 | 0.472027568 | -0.458369 | 0.001314 | hypomethylated |
| cg20610950 | 0.87319 | 0.635487568 | -0.458432 | 5.06E-05 | hypomethylated |
| cg05476182 | 0.52615 | 0.382867027 | -0.458631 | 5.06E-05 | hypomethylated |
| cg10821261 | 0.54137 | 0.393936757 | -0.458651 | 0.006122 | hypomethylated |
| cg15668538 | 0.74601 | 0.542823243 | -0.458712 | 4.05E-05 | hypomethylated |
| cg01259329 | 0.90546 | 0.658836216 | -0.458731 | 4.01E-06 | hypomethylated |
| cg07819010 | 0.7982  | 0.580777297 | -0.458765 | 1.39E-05 | hypomethylated |
| cg09361094 | 0.67737 | 0.492859459 | -0.458768 | 0.000207 | hypomethylated |
| cg12583970 | 0.89064 | 0.648016216 | -0.458812 | 2.83E-06 | hypomethylated |
| cg14707834 | 0.59446 | 0.432492973 | -0.458903 | 0.007408 | hypomethylated |
| cg26853371 | 0.86238 | 0.627405405 | -0.458926 | 1.39E-05 | hypomethylated |
| cg02170478 | 0.42826 | 0.311540541 | -0.459067 | 0.000221 | hypomethylated |
| cg01638311 | 0.78284 | 0.569477838 | -0.459078 | 0.000365 | hypomethylated |
| cg23428143 | 0.74986 | 0.545451351 | -0.459171 | 2.92E-05 | hypomethylated |
| cg20373326 | 0.56652 | 0.412086486 | -0.45918  | 3.32E-05 | hypomethylated |
| cg18704527 | 0.71476 | 0.519882162 | -0.459274 | 0.003316 | hypomethylated |
| cg00583535 | 0.4531  | 0.329559459 | -0.459291 | 0.00032  | hypomethylated |
| cg22923514 | 0.47905 | 0.348377838 | -0.459523 | 4.82E-05 | hypomethylated |
| cg26971423 | 0.85475 | 0.621569189 | -0.459588 | 3.40E-05 | hypomethylated |
| cg19164997 | 0.83906 | 0.610152973 | -0.459603 | 1.09E-06 | hypomethylated |
| cg13393785 | 0.57006 | 0.414515135 | -0.459689 | 9.82E-06 | hypomethylated |
| cg03907390 | 0.59666 | 0.433841622 | -0.459741 | 0.001651 | hypomethylated |
| cg13625026 | 0.49219 | 0.357860541 | -0.459818 | 0.0006   | hypomethylated |
| cg03334213 | 0.68409 | 0.497384324 | -0.459825 | 3.53E-05 | hypomethylated |
| cg13892257 | 0.79658 | 0.57914     | -0.459907 | 4.94E-05 | hypomethylated |
| cg20346503 | 0.78905 | 0.573655135 | -0.459933 | 3.57E-05 | hypomethylated |
| cg11785183 | 0.73223 | 0.53233027  | -0.459975 | 4.12E-06 | hypomethylated |
| cg12400025 | 0.88893 | 0.646241081 | -0.459997 | 9.07E-06 | hypomethylated |
| cg23465685 | 0.82513 | 0.599853514 | -0.460011 | 9.27E-05 | hypomethylated |
| cg01461514 | 0.64239 | 0.467004324 | -0.460014 | 5.06E-05 | hypomethylated |
| cg27178677 | 0.7238  | 0.526140541 | -0.460143 | 6.46E-05 | hypomethylated |
| cg17861277 | 0.72391 | 0.526217297 | -0.460152 | 0.000667 | hypomethylated |
| cg10275770 | 0.52428 | 0.381098919 | -0.460172 | 0.001734 | hypomethylated |
| cg13884879 | 0.84428 | 0.613650811 | -0.460304 | 6.75E-06 | hypomethylated |
| cg12103951 | 0.534   | 0.388089189 | -0.460451 | 0.00078  | hypomethylated |
| cg09010372 | 0.83206 | 0.604661081 | -0.460561 | 6.30E-07 | hypomethylated |
| cg22341848 | 0.59625 | 0.433288108 | -0.460591 | 2.10E-06 | hypomethylated |
| cg02770724 | 0.6446  | 0.468379459 | -0.460726 | 0.001314 | hypomethylated |
| cg24797508 | 0.58413 | 0.424414595 | -0.460815 | 0.001875 | hypomethylated |
| cg00892792 | 0.84217 | 0.611896216 | -0.460825 | 0.00024  | hypomethylated |
| cg13042250 | 0.87924 | 0.638822162 | -0.460843 | 7.72E-06 | hypomethylated |
| cg15379858 | 0.78213 | 0.568265405 | -0.460844 | 2.39E-05 | hypomethylated |
| cg00412772 | 0.62336 | 0.452905946 | -0.460854 | 2.61E-05 | hypomethylated |
| cg23327896 | 0.85774 | 0.623193514 | -0.46086  | 0.000111 | hypomethylated |



|            |         |             |           |          |                |
|------------|---------|-------------|-----------|----------|----------------|
| cg16594468 | 0.60274 | 0.437888649 | -0.460972 | 8.63E-05 | hypomethylated |
| cg19556284 | 0.84202 | 0.611697838 | -0.461035 | 3.49E-05 | hypomethylated |
| cg19609923 | 0.64293 | 0.467051351 | -0.46108  | 1.21E-05 | hypomethylated |
| cg03512414 | 0.63215 | 0.459207568 | -0.461121 | 0.00054  | hypomethylated |
| cg09518969 | 0.80393 | 0.583973514 | -0.461167 | 2.78E-05 | hypomethylated |
| cg25750901 | 0.55581 | 0.403704865 | -0.461291 | 0.000138 | hypomethylated |
| cg01878963 | 0.81136 | 0.589316757 | -0.461299 | 5.72E-05 | hypomethylated |
| cg18964590 | 0.69515 | 0.504902162 | -0.46132  | 5.58E-05 | hypomethylated |
| cg04321126 | 0.58168 | 0.422481622 | -0.461337 | 6.15E-05 | hypomethylated |
| cg00039463 | 0.73738 | 0.535556216 | -0.46137  | 1.84E-05 | hypomethylated |
| cg08158518 | 0.80372 | 0.583701081 | -0.461463 | 3.40E-05 | hypomethylated |
| cg18310639 | 0.63134 | 0.45848973  | -0.461528 | 0.001603 | hypomethylated |
| cg09171931 | 0.84402 | 0.612905946 | -0.461611 | 1.58E-05 | hypomethylated |
| cg02057755 | 0.53851 | 0.391047027 | -0.461631 | 0.000129 | hypomethylated |
| cg07943832 | 0.84747 | 0.61536     | -0.461732 | 3.32E-05 | hypomethylated |
| cg14408823 | 0.73849 | 0.536210811 | -0.461778 | 3.39E-06 | hypomethylated |
| cg07545081 | 0.76011 | 0.551886486 | -0.461837 | 3.95E-05 | hypomethylated |
| cg10094191 | 0.67794 | 0.492215676 | -0.461867 | 1.82E-05 | hypomethylated |
| cg03246914 | 0.68681 | 0.498648108 | -0.461889 | 0.000313 | hypomethylated |
| cg18763536 | 0.6005  | 0.435981622 | -0.461897 | 0.000789 | hypomethylated |
| cg02732164 | 0.7004  | 0.508507568 | -0.46191  | 3.85E-06 | hypomethylated |
| cg08894532 | 0.57722 | 0.419069189 | -0.461933 | 0.010042 | hypomethylated |
| cg05396156 | 0.89031 | 0.646371892 | -0.461943 | 3.90E-06 | hypomethylated |
| cg08418872 | 0.80087 | 0.581437297 | -0.461944 | 0.000696 | hypomethylated |
| cg25637966 | 0.64857 | 0.47081027  | -0.462117 | 5.45E-05 | hypomethylated |
| cg03956353 | 0.79242 | 0.575226486 | -0.462135 | 3.69E-06 | hypomethylated |
| cg03950253 | 0.72019 | 0.522787568 | -0.462153 | 0.00028  | hypomethylated |
| cg01335980 | 0.81528 | 0.591804324 | -0.462175 | 5.19E-05 | hypomethylated |
| cg02737399 | 0.83074 | 0.603023243 | -0.462183 | 2.05E-06 | hypomethylated |
| cg04327247 | 0.67771 | 0.491940541 | -0.462184 | 0.00018  | hypomethylated |
| cg26184501 | 0.74656 | 0.541900541 | -0.46223  | 5.89E-06 | hypomethylated |
| cg17087907 | 0.76136 | 0.552618919 | -0.462294 | 7.72E-06 | hypomethylated |
| cg00049616 | 0.88426 | 0.64182     | -0.462302 | 6.39E-06 | hypomethylated |
| cg21253043 | 0.71477 | 0.518798378 | -0.462305 | 1.71E-05 | hypomethylated |
| cg15302379 | 0.72803 | 0.52840973  | -0.462341 | 5.58E-05 | hypomethylated |
| cg21226965 | 0.82338 | 0.597615135 | -0.462342 | 6.78E-05 | hypomethylated |
| cg13328209 | 0.86151 | 0.625243243 | -0.46245  | 1.94E-05 | hypomethylated |
| cg15133098 | 0.7498  | 0.544167027 | -0.462456 | 0.000485 | hypomethylated |
| cg12251803 | 0.63072 | 0.457730811 | -0.4625   | 0.000193 | hypomethylated |
| cg25068347 | 0.67649 | 0.490918919 | -0.462584 | 0.000822 | hypomethylated |
| cg04833731 | 0.84853 | 0.615742162 | -0.462639 | 2.78E-05 | hypomethylated |
| cg03704061 | 0.67261 | 0.488064324 | -0.462699 | 1.35E-05 | hypomethylated |
| cg25392995 | 0.75493 | 0.547783784 | -0.462736 | 8.42E-05 | hypomethylated |
| cg06895640 | 0.78317 | 0.568252432 | -0.462794 | 0.000251 | hypomethylated |
| cg08133629 | 0.60233 | 0.437013514 | -0.462876 | 0.00024  | hypomethylated |
| cg19654061 | 0.78787 | 0.571617297 | -0.462908 | 3.85E-05 | hypomethylated |
| cg09084279 | 0.69744 | 0.505964865 | -0.463032 | 2.32E-05 | hypomethylated |
| cg03116016 | 0.60326 | 0.437628649 | -0.463073 | 0.000459 | hypomethylated |
| cg13742752 | 0.8498  | 0.616478378 | -0.463073 | 8.60E-06 | hypomethylated |
| cg21988950 | 0.87099 | 0.631824324 | -0.463133 | 4.01E-06 | hypomethylated |
| cg21772953 | 0.81575 | 0.59172     | -0.463212 | 2.36E-06 | hypomethylated |
| cg12925881 | 0.82939 | 0.601607027 | -0.463229 | 2.21E-05 | hypomethylated |
| cg10399269 | 0.83507 | 0.605668108 | -0.46337  | 4.60E-06 | hypomethylated |
| cg25627341 | 0.68896 | 0.499683784 | -0.463405 | 0.000214 | hypomethylated |
| cg27600804 | 0.56909 | 0.412743784 | -0.46341  | 0.000112 | hypomethylated |
| cg16482761 | 0.81853 | 0.593651351 | -0.463419 | 1.01E-05 | hypomethylated |
| cg24951886 | 0.81474 | 0.590901081 | -0.463423 | 8.63E-05 | hypomethylated |
| cg06639923 | 0.80544 | 0.584155135 | -0.463426 | 1.80E-05 | hypomethylated |

|            |         |             |           |          |                |
|------------|---------|-------------|-----------|----------|----------------|
| cg02939781 | 0.85237 | 0.618173514 | -0.463468 | 3.95E-05 | hypomethylated |
| cg16018921 | 0.84771 | 0.614793514 | -0.463469 | 3.67E-05 | hypomethylated |
| cg08047629 | 0.80194 | 0.581557838 | -0.463572 | 2.79E-06 | hypomethylated |
| cg20226122 | 0.88699 | 0.643226486 | -0.463591 | 7.52E-06 | hypomethylated |
| cg04987071 | 0.81139 | 0.588376216 | -0.463657 | 7.84E-05 | hypomethylated |
| cg07669403 | 0.6136  | 0.444944324 | -0.463674 | 0.002026 | hypomethylated |
| cg08122151 | 0.60042 | 0.435376757 | -0.463708 | 0.000259 | hypomethylated |
| cg17015522 | 0.69926 | 0.507031892 | -0.463752 | 0.000187 | hypomethylated |
| cg05173058 | 0.74283 | 0.538621081 | -0.463761 | 9.72E-05 | hypomethylated |
| cg14793844 | 0.77854 | 0.564486486 | -0.463832 | 2.71E-05 | hypomethylated |
| cg12919119 | 0.43427 | 0.31487027  | -0.463835 | 0.000163 | hypomethylated |
| cg25499746 | 0.85853 | 0.622472973 | -0.463857 | 6.75E-06 | hypomethylated |
| cg02012159 | 0.68541 | 0.496916216 | -0.463965 | 3.85E-05 | hypomethylated |
| cg14583406 | 0.69389 | 0.503031892 | -0.464057 | 3.32E-05 | hypomethylated |
| cg20792436 | 0.92539 | 0.670851351 | -0.464068 | 7.12E-06 | hypomethylated |
| cg06729381 | 0.62643 | 0.454090811 | -0.464172 | 0.00078  | hypomethylated |
| cg10598776 | 0.7724  | 0.559898919 | -0.464182 | 9.96E-06 | hypomethylated |
| cg15430294 | 0.55209 | 0.400198919 | -0.464186 | 0.000138 | hypomethylated |
| cg06784218 | 0.50008 | 0.362463243 | -0.464324 | 5.00E-06 | hypomethylated |
| cg01638792 | 0.91284 | 0.661603243 | -0.464396 | 2.49E-06 | hypomethylated |
| cg16405308 | 0.71896 | 0.521078378 | -0.464411 | 6.75E-06 | hypomethylated |
| cg19909117 | 0.67786 | 0.491281622 | -0.464437 | 0.000123 | hypomethylated |
| cg15679747 | 0.91156 | 0.660618378 | -0.464521 | 4.36E-06 | hypomethylated |
| cg08314781 | 0.73017 | 0.529115135 | -0.464651 | 6.62E-05 | hypomethylated |
| cg25255988 | 0.75127 | 0.544399459 | -0.464666 | 7.32E-06 | hypomethylated |
| cg02443967 | 0.92147 | 0.667704324 | -0.464728 | 5.81E-06 | hypomethylated |
| cg05984508 | 0.51034 | 0.369788108 | -0.46476  | 0.003773 | hypomethylated |
| cg01542423 | 0.81715 | 0.592095135 | -0.464772 | 4.48E-06 | hypomethylated |
| cg10648763 | 0.52225 | 0.378396757 | -0.464841 | 0.000378 | hypomethylated |
| cg20689294 | 0.53145 | 0.385045405 | -0.464905 | 0.001734 | hypomethylated |
| cg14089474 | 0.84204 | 0.610065946 | -0.464924 | 8.15E-06 | hypomethylated |
| cg09104660 | 0.45709 | 0.331163784 | -0.464933 | 0.007282 | hypomethylated |
| cg04466743 | 0.64034 | 0.463928649 | -0.464935 | 8.42E-05 | hypomethylated |
| cg11778714 | 0.82547 | 0.598036757 | -0.464982 | 1.37E-06 | hypomethylated |
| cg24782497 | 0.6021  | 0.436206486 | -0.464992 | 0.00012  | hypomethylated |
| cg08719608 | 0.5079  | 0.367955135 | -0.465015 | 0.003441 | hypomethylated |
| cg19169342 | 0.5194  | 0.376284324 | -0.465023 | 7.65E-05 | hypomethylated |
| cg21331510 | 0.75071 | 0.543814595 | -0.465141 | 6.22E-06 | hypomethylated |
| cg10712476 | 0.83092 | 0.601875135 | -0.465245 | 3.49E-05 | hypomethylated |
| cg00264133 | 0.77683 | 0.562672973 | -0.465302 | 5.45E-05 | hypomethylated |
| cg25554496 | 0.8352  | 0.604921622 | -0.465373 | 5.45E-05 | hypomethylated |
| cg17571266 | 0.51262 | 0.37126973  | -0.465422 | 0.000545 | hypomethylated |
| cg21531126 | 0.82554 | 0.597851892 | -0.46555  | 1.66E-05 | hypomethylated |
| cg06768939 | 0.7802  | 0.564991351 | -0.465615 | 7.22E-06 | hypomethylated |
| cg22233974 | 0.68844 | 0.498541622 | -0.465617 | 0.000857 | hypomethylated |
| cg04150954 | 0.71763 | 0.519662703 | -0.465665 | 6.62E-05 | hypomethylated |
| cg24804768 | 0.56893 | 0.411983243 | -0.465665 | 0.000857 | hypomethylated |
| cg08455089 | 0.85264 | 0.617415135 | -0.465696 | 2.36E-06 | hypomethylated |
| cg02560744 | 0.80456 | 0.582596757 | -0.465702 | 4.58E-05 | hypomethylated |
| cg00414041 | 0.92862 | 0.672423243 | -0.465719 | 2.13E-06 | hypomethylated |
| cg01312394 | 0.7293  | 0.528092432 | -0.465722 | 5.58E-05 | hypomethylated |
| cg06383241 | 0.6255  | 0.452923243 | -0.465743 | 0.005316 | hypomethylated |
| cg14329285 | 0.83794 | 0.606744324 | -0.465758 | 3.81E-05 | hypomethylated |
| cg16235748 | 0.52503 | 0.380152973 | -0.46582  | 0.000667 | hypomethylated |
| cg08053935 | 0.51903 | 0.375804324 | -0.465836 | 0.000122 | hypomethylated |
| cg03224627 | 0.81613 | 0.590909189 | -0.465863 | 2.21E-05 | hypomethylated |
| cg13131015 | 0.78389 | 0.567556757 | -0.465887 | 1.11E-05 | hypomethylated |
| cg14281591 | 0.77663 | 0.562263243 | -0.465982 | 0.000271 | hypomethylated |

|            |         |             |           |          |                |
|------------|---------|-------------|-----------|----------|----------------|
| cg27228272 | 0.77335 | 0.559881622 | -0.466    | 0.000224 | hypomethylated |
| cg07867517 | 0.80314 | 0.581440541 | -0.46602  | 0.000191 | hypomethylated |
| cg16289449 | 0.43866 | 0.317550811 | -0.466116 | 0.003378 | hypomethylated |
| cg23527468 | 0.77869 | 0.563677838 | -0.466178 | 2.45E-05 | hypomethylated |
| cg20415517 | 0.90482 | 0.654962703 | -0.466218 | 9.49E-05 | hypomethylated |
| cg19614643 | 0.76757 | 0.5556      | -0.466252 | 0.000386 | hypomethylated |
| cg10254082 | 0.70571 | 0.510810811 | -0.466286 | 1.33E-05 | hypomethylated |
| cg14557690 | 0.77714 | 0.562492973 | -0.466339 | 1.18E-05 | hypomethylated |
| cg00514486 | 0.55022 | 0.398230811 | -0.466404 | 6.46E-05 | hypomethylated |
| cg21201572 | 0.80603 | 0.583374054 | -0.466412 | 0.000382 | hypomethylated |
| cg24021846 | 0.61349 | 0.444005946 | -0.466461 | 0.0003   | hypomethylated |
| cg01342115 | 0.74169 | 0.536765405 | -0.466525 | 0.000931 | hypomethylated |
| cg20769856 | 0.7111  | 0.514607568 | -0.46658  | 0.000386 | hypomethylated |
| cg11421768 | 0.92513 | 0.669487568 | -0.466599 | 7.84E-05 | hypomethylated |
| cg20567368 | 0.61978 | 0.448475135 | -0.466728 | 0.000317 | hypomethylated |
| cg04799329 | 0.79759 | 0.577135676 | -0.466737 | 1.09E-05 | hypomethylated |
| cg03333699 | 0.73227 | 0.529862703 | -0.466757 | 1.42E-05 | hypomethylated |
| cg00546897 | 0.62687 | 0.453584865 | -0.466794 | 5.72E-05 | hypomethylated |
| cg16073408 | 0.72613 | 0.525385946 | -0.46685  | 0.000123 | hypomethylated |
| cg04153489 | 0.55641 | 0.402580541 | -0.466871 | 6.01E-05 | hypomethylated |
| cg24125648 | 0.30091 | 0.217709189 | -0.46693  | 0.000866 | hypomethylated |
| cg08827700 | 0.80075 | 0.579342162 | -0.466936 | 6.39E-06 | hypomethylated |
| cg04689606 | 0.83831 | 0.606507568 | -0.466958 | 0.000214 | hypomethylated |
| cg23697406 | 0.65624 | 0.474767568 | -0.467002 | 0.00012  | hypomethylated |
| cg09871057 | 0.61457 | 0.444616757 | -0.467015 | 0.000681 | hypomethylated |
| cg15484375 | 0.52006 | 0.376238919 | -0.467029 | 0.00054  | hypomethylated |
| cg16736889 | 0.78292 | 0.566381081 | -0.467092 | 0.000839 | hypomethylated |
| cg01207473 | 0.74444 | 0.538523243 | -0.467147 | 0.000119 | hypomethylated |
| cg02241145 | 0.61795 | 0.446996757 | -0.467226 | 2.32E-05 | hypomethylated |
| cg00154455 | 0.788   | 0.569986486 | -0.467268 | 2.10E-05 | hypomethylated |
| cg11644973 | 0.84992 | 0.614723243 | -0.46739  | 9.31E-06 | hypomethylated |
| cg14473904 | 0.82334 | 0.595491351 | -0.467408 | 1.28E-05 | hypomethylated |
| cg15636519 | 0.69544 | 0.502978378 | -0.46743  | 0.001176 | hypomethylated |
| cg01081096 | 0.66773 | 0.482912432 | -0.467503 | 1.56E-05 | hypomethylated |
| cg10639435 | 0.66679 | 0.48222     | -0.467541 | 0.000174 | hypomethylated |
| cg04895166 | 0.70563 | 0.510275676 | -0.467635 | 4.18E-06 | hypomethylated |
| cg13887966 | 0.9224  | 0.666947568 | -0.467819 | 3.21E-06 | hypomethylated |
| cg01982835 | 0.72244 | 0.522351351 | -0.467857 | 1.01E-05 | hypomethylated |
| cg05975710 | 0.49152 | 0.355383784 | -0.467872 | 4.26E-05 | hypomethylated |
| cg13823169 | 0.59284 | 0.428639459 | -0.467878 | 0.000191 | hypomethylated |
| cg00110832 | 0.68221 | 0.493252432 | -0.46789  | 0.000107 | hypomethylated |
| cg11061343 | 0.62595 | 0.45257027  | -0.467906 | 0.001987 | hypomethylated |
| cg02745494 | 0.7463  | 0.539540541 | -0.468024 | 2.04E-05 | hypomethylated |
| cg26458557 | 0.86536 | 0.625598378 | -0.468064 | 3.25E-07 | hypomethylated |
| cg26683025 | 0.94978 | 0.686627027 | -0.468067 | 5.50E-06 | hypomethylated |
| cg02968918 | 0.63623 | 0.45994973  | -0.468072 | 6.15E-05 | hypomethylated |
| cg10949576 | 0.46782 | 0.3382      | -0.468077 | 5.19E-05 | hypomethylated |
| cg15540723 | 0.45251 | 0.327123243 | -0.468115 | 4.58E-05 | hypomethylated |
| cg18912103 | 0.75201 | 0.543619459 | -0.468155 | 0.00014  | hypomethylated |
| cg02332117 | 0.4255  | 0.307586486 | -0.468167 | 9.83E-05 | hypomethylated |
| cg11583041 | 0.85485 | 0.617860541 | -0.46839  | 9.11E-07 | hypomethylated |
| cg05070273 | 0.85586 | 0.618586486 | -0.4684   | 7.03E-06 | hypomethylated |
| cg01511480 | 0.73321 | 0.529925946 | -0.468436 | 3.95E-05 | hypomethylated |
| cg00292107 | 0.62527 | 0.451887568 | -0.468515 | 0.00017  | hypomethylated |
| cg02314348 | 0.74884 | 0.541178919 | -0.468552 | 1.08E-05 | hypomethylated |
| cg02671204 | 0.83238 | 0.601548649 | -0.468561 | 8.15E-06 | hypomethylated |
| cg21187068 | 0.72442 | 0.523492973 | -0.468656 | 2.27E-05 | hypomethylated |
| cg18015534 | 0.77468 | 0.559795676 | -0.4687   | 1.31E-05 | hypomethylated |

|            |         |             |           |          |                |
|------------|---------|-------------|-----------|----------|----------------|
| cg14151158 | 0.90366 | 0.652968649 | -0.468766 | 1.71E-05 | hypomethylated |
| cg02079584 | 0.5244  | 0.378920541 | -0.468772 | 4.94E-05 | hypomethylated |
| cg01053766 | 0.85847 | 0.620275676 | -0.468858 | 4.48E-06 | hypomethylated |
| cg07468956 | 0.87307 | 0.63082     | -0.468869 | 4.93E-06 | hypomethylated |
| cg09956592 | 0.54467 | 0.393524865 | -0.468928 | 8.52E-05 | hypomethylated |
| cg19872681 | 0.69165 | 0.49968     | -0.469038 | 4.70E-05 | hypomethylated |
| cg22909609 | 0.63707 | 0.460232973 | -0.469088 | 0.000219 | hypomethylated |
| cg17588294 | 0.68172 | 0.492444324 | -0.469219 | 1.68E-05 | hypomethylated |
| cg21721825 | 0.74007 | 0.534587568 | -0.469235 | 4.36E-05 | hypomethylated |
| cg05986067 | 0.64318 | 0.464586486 | -0.469275 | 6.95E-05 | hypomethylated |
| cg19687075 | 0.63212 | 0.456581622 | -0.469326 | 0.001041 | hypomethylated |
| cg23508201 | 0.67652 | 0.488575676 | -0.469551 | 0.000104 | hypomethylated |
| cg27005118 | 0.65061 | 0.469848108 | -0.469599 | 0.000426 | hypomethylated |
| cg06574229 | 0.58467 | 0.422207027 | -0.469672 | 7.56E-05 | hypomethylated |
| cg05664039 | 0.97133 | 0.701400541 | -0.469723 | 8.34E-07 | hypomethylated |
| cg12707926 | 0.44178 | 0.31899027  | -0.469816 | 1.26E-05 | hypomethylated |
| cg07699978 | 0.83738 | 0.604610811 | -0.469876 | 2.32E-05 | hypomethylated |
| cg10091408 | 0.64434 | 0.465222162 | -0.469902 | 3.95E-05 | hypomethylated |
| cg05091736 | 0.78044 | 0.56348     | -0.469923 | 1.06E-05 | hypomethylated |
| cg06704631 | 0.7244  | 0.522977297 | -0.470038 | 7.29E-05 | hypomethylated |
| cg08802482 | 0.62146 | 0.448633514 | -0.470124 | 6.08E-05 | hypomethylated |
| cg25136988 | 0.84684 | 0.61133027  | -0.470137 | 0.000138 | hypomethylated |
| cg21088438 | 0.75639 | 0.546021081 | -0.470174 | 0.000193 | hypomethylated |
| cg00934322 | 0.51942 | 0.374956757 | -0.470177 | 6.95E-05 | hypomethylated |
| cg08792976 | 0.50268 | 0.362838378 | -0.470313 | 3.67E-05 | hypomethylated |
| cg00390511 | 0.82615 | 0.596306486 | -0.47035  | 3.44E-05 | hypomethylated |
| cg21617357 | 0.87971 | 0.634961622 | -0.470359 | 1.02E-06 | hypomethylated |
| cg07336987 | 0.66082 | 0.476947568 | -0.470427 | 0.000207 | hypomethylated |
| cg25810857 | 0.68452 | 0.494042703 | -0.470457 | 4.58E-05 | hypomethylated |
| cg18721397 | 0.78225 | 0.564555135 | -0.470515 | 0.000221 | hypomethylated |
| cg16680451 | 0.4581  | 0.330610811 | -0.470529 | 2.39E-05 | hypomethylated |
| cg08889480 | 0.80829 | 0.583307568 | -0.470616 | 2.21E-05 | hypomethylated |
| cg10930290 | 0.73893 | 0.533251351 | -0.470622 | 3.40E-05 | hypomethylated |
| cg12081267 | 0.88057 | 0.635463243 | -0.470629 | 5.58E-06 | hypomethylated |
| cg03167883 | 0.57687 | 0.416296757 | -0.470634 | 5.79E-05 | hypomethylated |
| cg06850099 | 0.72957 | 0.52649027  | -0.47064  | 0.000506 | hypomethylated |
| cg18222590 | 0.63368 | 0.457286486 | -0.470656 | 8.60E-06 | hypomethylated |
| cg07594247 | 0.74445 | 0.537212432 | -0.470682 | 0.000426 | hypomethylated |
| cg12127162 | 0.69811 | 0.50376     | -0.470718 | 7.72E-06 | hypomethylated |
| cg09364122 | 0.94681 | 0.683196757 | -0.470774 | 3.90E-06 | hypomethylated |
| cg09303236 | 0.65484 | 0.472506486 | -0.470808 | 2.71E-05 | hypomethylated |
| cg04130572 | 0.51011 | 0.368064324 | -0.47085  | 1.99E-05 | hypomethylated |
| cg15979932 | 0.81045 | 0.584731892 | -0.470948 | 2.27E-05 | hypomethylated |
| cg04766043 | 0.88734 | 0.640194054 | -0.470978 | 5.43E-06 | hypomethylated |
| cg13560619 | 0.86345 | 0.622956757 | -0.470981 | 2.36E-06 | hypomethylated |
| cg25078649 | 0.94501 | 0.681795135 | -0.470991 | 8.48E-06 | hypomethylated |
| cg04833713 | 0.89666 | 0.646826486 | -0.471182 | 2.42E-06 | hypomethylated |
| cg11147155 | 0.54937 | 0.39629027  | -0.471221 | 0.004365 | hypomethylated |
| cg19981409 | 0.62553 | 0.451220541 | -0.471246 | 0.001511 | hypomethylated |
| cg05338167 | 0.791   | 0.570579459 | -0.47125  | 3.15E-05 | hypomethylated |
| cg22992966 | 0.64746 | 0.467037838 | -0.471252 | 1.99E-05 | hypomethylated |
| cg07810884 | 0.63277 | 0.456438378 | -0.471261 | 0.000268 | hypomethylated |
| cg18995031 | 0.80153 | 0.578164865 | -0.471276 | 9.57E-06 | hypomethylated |
| cg15534755 | 0.61985 | 0.4471      | -0.471322 | 0.000313 | hypomethylated |
| cg00075967 | 0.77706 | 0.560488108 | -0.471342 | 9.27E-05 | hypomethylated |
| cg12009872 | 0.46303 | 0.333977297 | -0.471356 | 0.00134  | hypomethylated |
| cg25271892 | 0.4879  | 0.351896757 | -0.471433 | 0.000251 | hypomethylated |
| cg26912131 | 0.58674 | 0.42317027  | -0.471483 | 2.57E-05 | hypomethylated |

|            |         |             |           |          |                |
|------------|---------|-------------|-----------|----------|----------------|
| cg15877233 | 0.75753 | 0.546332432 | -0.471524 | 2.85E-05 | hypomethylated |
| cg03532013 | 0.88805 | 0.640454054 | -0.471546 | 2.32E-05 | hypomethylated |
| cg05545454 | 0.80241 | 0.578664324 | -0.471613 | 0.000187 | hypomethylated |
| cg10396171 | 0.85651 | 0.617676757 | -0.471618 | 0.000182 | hypomethylated |
| cg18961788 | 0.73231 | 0.528072432 | -0.471719 | 2.85E-05 | hypomethylated |
| cg09272225 | 0.759   | 0.54731027  | -0.471741 | 0.000588 | hypomethylated |
| cg07097722 | 0.75467 | 0.544173514 | -0.471779 | 0.000474 | hypomethylated |
| cg27145347 | 0.83608 | 0.602864865 | -0.471806 | 3.95E-05 | hypomethylated |
| cg10583319 | 0.52527 | 0.378748108 | -0.471821 | 0.000417 | hypomethylated |
| cg14642259 | 0.95863 | 0.691205946 | -0.471858 | 6.93E-06 | hypomethylated |
| cg07227049 | 0.82901 | 0.597743784 | -0.471862 | 3.40E-05 | hypomethylated |
| cg00608661 | 0.77503 | 0.558814595 | -0.471882 | 7.93E-05 | hypomethylated |
| cg23268102 | 0.71514 | 0.51560973  | -0.471946 | 4.58E-05 | hypomethylated |
| cg18788725 | 0.74968 | 0.540508108 | -0.471959 | 0.000157 | hypomethylated |
| cg00622170 | 0.87489 | 0.630699459 | -0.472149 | 7.32E-06 | hypomethylated |
| cg24766327 | 0.57272 | 0.412862703 | -0.472168 | 0.000342 | hypomethylated |
| cg26073844 | 0.8244  | 0.594286486 | -0.472186 | 3.85E-05 | hypomethylated |
| cg13180566 | 0.81873 | 0.59019027  | -0.472208 | 4.14E-07 | hypomethylated |
| cg06061240 | 0.81772 | 0.589454595 | -0.472226 | 1.12E-05 | hypomethylated |
| cg01922891 | 0.48575 | 0.350131892 | -0.472316 | 0.000155 | hypomethylated |
| cg12611897 | 0.7338  | 0.528916757 | -0.472346 | 0.000426 | hypomethylated |
| cg24710179 | 0.7627  | 0.549697838 | -0.472477 | 2.64E-05 | hypomethylated |
| cg05235884 | 0.86451 | 0.623052973 | -0.472528 | 1.72E-06 | hypomethylated |
| cg02683307 | 0.62676 | 0.451678919 | -0.472616 | 5.89E-06 | hypomethylated |
| cg10734044 | 0.83302 | 0.600315676 | -0.47263  | 1.64E-05 | hypomethylated |
| cg01359236 | 0.55274 | 0.398327027 | -0.472648 | 3.23E-05 | hypomethylated |
| cg05075308 | 0.84118 | 0.606151892 | -0.472735 | 8.22E-05 | hypomethylated |
| cg16663033 | 0.52107 | 0.375470811 | -0.472776 | 0.000245 | hypomethylated |
| cg21307155 | 0.66077 | 0.476082703 | -0.472936 | 1.01E-05 | hypomethylated |
| cg08932727 | 0.43836 | 0.315835676 | -0.472942 | 0.000408 | hypomethylated |
| cg11693709 | 0.76907 | 0.554096216 | -0.472978 | 3.00E-05 | hypomethylated |
| cg24756966 | 0.73842 | 0.532000541 | -0.473014 | 2.51E-05 | hypomethylated |
| cg24542821 | 0.79147 | 0.570208108 | -0.473046 | 1.39E-05 | hypomethylated |
| cg10731020 | 0.79863 | 0.575362162 | -0.473057 | 2.42E-06 | hypomethylated |
| cg08611549 | 0.69059 | 0.497518919 | -0.473078 | 7.65E-05 | hypomethylated |
| cg07802625 | 0.45254 | 0.325996216 | -0.47319  | 0.000106 | hypomethylated |
| cg22321808 | 0.8135  | 0.586004865 | -0.47323  | 9.57E-06 | hypomethylated |
| cg20014974 | 0.60467 | 0.435569189 | -0.473246 | 0.000454 | hypomethylated |
| cg14174336 | 0.4583  | 0.330131892 | -0.47325  | 0.016061 | hypomethylated |
| cg27178401 | 0.83757 | 0.603329189 | -0.473264 | 3.95E-05 | hypomethylated |
| cg13112524 | 0.70299 | 0.506385946 | -0.473267 | 3.85E-05 | hypomethylated |
| cg25515997 | 0.84063 | 0.605518919 | -0.473299 | 7.29E-05 | hypomethylated |
| cg22376262 | 0.70973 | 0.511216216 | -0.473337 | 0.000545 | hypomethylated |
| cg15634747 | 0.60252 | 0.433981622 | -0.473375 | 0.000262 | hypomethylated |
| cg07261186 | 0.84347 | 0.607514595 | -0.473418 | 4.58E-05 | hypomethylated |
| cg04977528 | 0.75029 | 0.540394054 | -0.473437 | 0.000361 | hypomethylated |
| cg22996170 | 0.73953 | 0.532641081 | -0.473445 | 9.72E-05 | hypomethylated |
| cg08205396 | 0.70523 | 0.507921081 | -0.473489 | 0.00012  | hypomethylated |
| cg26522708 | 0.64996 | 0.468108108 | -0.473509 | 0.000102 | hypomethylated |
| cg22525069 | 0.84667 | 0.609775676 | -0.473521 | 9.38E-07 | hypomethylated |
| cg13431028 | 0.8777  | 0.632103243 | -0.473568 | 2.71E-05 | hypomethylated |
| cg20856545 | 0.68981 | 0.496782703 | -0.473584 | 6.95E-05 | hypomethylated |
| cg12685560 | 0.42067 | 0.302942162 | -0.473647 | 0.001571 | hypomethylated |
| cg26366616 | 0.76869 | 0.553518919 | -0.473769 | 4.47E-05 | hypomethylated |
| cg24593464 | 0.68208 | 0.491128649 | -0.47384  | 3.12E-06 | hypomethylated |
| cg09439204 | 0.64413 | 0.463800541 | -0.473847 | 0.000718 | hypomethylated |
| cg17132079 | 0.47723 | 0.343599459 | -0.473957 | 5.86E-05 | hypomethylated |
| cg25616514 | 0.55374 | 0.398674595 | -0.473997 | 7.65E-05 | hypomethylated |

|            |         |             |           |          |                |
|------------|---------|-------------|-----------|----------|----------------|
| cg21915337 | 0.76208 | 0.548638919 | -0.474085 | 0.000112 | hypomethylated |
| cg25428297 | 0.43582 | 0.313747027 | -0.474131 | 0.00031  | hypomethylated |
| cg04435807 | 0.82719 | 0.59544973  | -0.474239 | 1.26E-05 | hypomethylated |
| cg18760360 | 0.69217 | 0.498230811 | -0.474312 | 3.07E-05 | hypomethylated |
| cg15600430 | 0.4989  | 0.359110811 | -0.474322 | 0.000245 | hypomethylated |
| cg07107130 | 0.52869 | 0.380553514 | -0.474323 | 0.007601 | hypomethylated |
| cg09650189 | 0.80994 | 0.58299027  | -0.474343 | 2.85E-05 | hypomethylated |
| cg04435320 | 0.84487 | 0.608117838 | -0.474378 | 2.10E-05 | hypomethylated |
| cg25755057 | 0.78444 | 0.564611892 | -0.474404 | 2.15E-05 | hypomethylated |
| cg19450816 | 0.6495  | 0.467479459 | -0.474427 | 0.000207 | hypomethylated |
| cg02353048 | 0.86709 | 0.624060541 | -0.474496 | 5.86E-05 | hypomethylated |
| cg07271261 | 0.65914 | 0.474370811 | -0.47457  | 3.81E-05 | hypomethylated |
| cg00152878 | 0.80755 | 0.581153514 | -0.474632 | 0.000112 | hypomethylated |
| cg08529744 | 0.44061 | 0.317070811 | -0.474697 | 1.80E-05 | hypomethylated |
| cg06700234 | 0.70563 | 0.507779459 | -0.47471  | 0.000412 | hypomethylated |
| cg27278470 | 0.73608 | 0.529677297 | -0.474749 | 3.85E-06 | hypomethylated |
| cg14911766 | 0.56142 | 0.403990811 | -0.474758 | 0.000293 | hypomethylated |
| cg10525372 | 0.85172 | 0.61285027  | -0.474845 | 4.48E-06 | hypomethylated |
| cg13442606 | 0.41134 | 0.295969189 | -0.474884 | 0.000174 | hypomethylated |
| cg03567939 | 0.83591 | 0.601455676 | -0.474889 | 1.25E-05 | hypomethylated |
| cg06707993 | 0.87374 | 0.628668649 | -0.474904 | 3.12E-06 | hypomethylated |
| cg17588094 | 0.91329 | 0.657122703 | -0.47491  | 1.15E-05 | hypomethylated |
| cg18883317 | 0.78215 | 0.562737297 | -0.474984 | 2.71E-06 | hypomethylated |
| cg07531549 | 0.74622 | 0.536833514 | -0.475126 | 9.27E-05 | hypomethylated |
| cg13821785 | 0.76044 | 0.547035676 | -0.475199 | 5.72E-05 | hypomethylated |
| cg08399733 | 0.92349 | 0.664282703 | -0.475299 | 1.15E-05 | hypomethylated |
| cg07018107 | 0.78448 | 0.564265405 | -0.475363 | 5.19E-05 | hypomethylated |
| cg02073525 | 0.79936 | 0.574967027 | -0.475366 | 2.56E-06 | hypomethylated |
| cg25928474 | 0.75742 | 0.544764865 | -0.47546  | 3.49E-05 | hypomethylated |
| cg27152299 | 0.77175 | 0.55506973  | -0.475465 | 1.49E-06 | hypomethylated |
| cg11344950 | 0.62685 | 0.45084973  | -0.475474 | 8.37E-06 | hypomethylated |
| cg21572000 | 0.85106 | 0.612105405 | -0.475481 | 5.25E-05 | hypomethylated |
| cg00687714 | 0.68946 | 0.495827027 | -0.47563  | 0.000369 | hypomethylated |
| cg01337514 | 0.6374  | 0.458377838 | -0.475662 | 4.12E-06 | hypomethylated |
| cg04813834 | 0.69018 | 0.496312432 | -0.475724 | 4.70E-05 | hypomethylated |
| cg17454094 | 0.50015 | 0.359645405 | -0.475786 | 0.001381 | hypomethylated |
| cg07172334 | 0.80616 | 0.579642162 | -0.475904 | 6.08E-05 | hypomethylated |
| cg06813100 | 0.44739 | 0.321668649 | -0.475958 | 2.48E-05 | hypomethylated |
| cg01845036 | 0.79406 | 0.570895676 | -0.476021 | 3.11E-05 | hypomethylated |
| cg10385692 | 0.60468 | 0.434683784 | -0.476206 | 6.86E-05 | hypomethylated |
| cg17208748 | 0.43557 | 0.313108108 | -0.476244 | 0.000207 | hypomethylated |
| cg21545548 | 0.89869 | 0.645994054 | -0.476303 | 4.12E-06 | hypomethylated |
| cg13703437 | 0.65546 | 0.471139459 | -0.476354 | 0.000506 | hypomethylated |
| cg21118780 | 0.77557 | 0.557425946 | -0.476477 | 2.39E-05 | hypomethylated |
| cg07944862 | 0.67927 | 0.488206486 | -0.476494 | 0.000626 | hypomethylated |
| cg15928742 | 0.82382 | 0.592093514 | -0.476504 | 9.49E-05 | hypomethylated |
| cg23765332 | 0.9068  | 0.651722703 | -0.476526 | 9.11E-07 | hypomethylated |
| cg00686132 | 0.67743 | 0.486872973 | -0.476526 | 0.000696 | hypomethylated |
| cg07991100 | 0.79433 | 0.570868108 | -0.476581 | 1.67E-06 | hypomethylated |
| cg04741094 | 0.83955 | 0.603342703 | -0.476639 | 1.50E-05 | hypomethylated |
| cg16676676 | 0.94872 | 0.681764324 | -0.476709 | 3.39E-06 | hypomethylated |
| cg21272843 | 0.79284 | 0.569702703 | -0.476821 | 2.39E-05 | hypomethylated |
| cg00475131 | 0.84711 | 0.608682162 | -0.47686  | 6.39E-06 | hypomethylated |
| cg08515811 | 0.93533 | 0.672070811 | -0.476862 | 4.01E-06 | hypomethylated |
| cg18914751 | 0.82166 | 0.590379459 | -0.476899 | 1.12E-05 | hypomethylated |
| cg06996254 | 0.82228 | 0.590793514 | -0.476976 | 0.00035  | hypomethylated |
| cg23552820 | 0.67673 | 0.486205405 | -0.477014 | 1.99E-05 | hypomethylated |
| cg02719634 | 0.81282 | 0.583955135 | -0.477078 | 1.48E-05 | hypomethylated |

|            |         |             |           |          |                |
|------------|---------|-------------|-----------|----------|----------------|
| cg14252164 | 0.80688 | 0.579638919 | -0.4772   | 4.36E-06 | hypomethylated |
| cg13856674 | 0.66866 | 0.480344324 | -0.477204 | 9.16E-05 | hypomethylated |
| cg23366752 | 0.82309 | 0.591276216 | -0.477218 | 3.79E-06 | hypomethylated |
| cg14074174 | 0.46065 | 0.330905946 | -0.47725  | 0.000523 | hypomethylated |
| cg03420978 | 0.56653 | 0.406963243 | -0.477254 | 0.00054  | hypomethylated |
| cg06580770 | 0.69893 | 0.502029189 | -0.477377 | 3.53E-05 | hypomethylated |
| cg02258414 | 0.69    | 0.495614595 | -0.477378 | 0.000324 | hypomethylated |
| cg18114294 | 0.58086 | 0.417208649 | -0.477421 | 0.000931 | hypomethylated |
| cg07974367 | 0.79059 | 0.567846486 | -0.477429 | 3.21E-06 | hypomethylated |
| cg02666638 | 0.29496 | 0.211845405 | -0.477507 | 5.38E-05 | hypomethylated |
| cg06285439 | 0.60937 | 0.437658378 | -0.477513 | 1.62E-05 | hypomethylated |
| cg23378074 | 0.73045 | 0.524618919 | -0.477516 | 0.000271 | hypomethylated |
| cg21769117 | 0.66035 | 0.474267568 | -0.47753  | 0.000335 | hypomethylated |
| cg25299319 | 0.72657 | 0.521807568 | -0.477584 | 6.22E-06 | hypomethylated |
| cg06814287 | 0.68805 | 0.494141622 | -0.477589 | 0.000626 | hypomethylated |
| cg05042708 | 0.44606 | 0.320340541 | -0.477631 | 0.00064  | hypomethylated |
| cg08320359 | 0.88301 | 0.634136757 | -0.477636 | 8.15E-06 | hypomethylated |
| cg05447343 | 0.70968 | 0.509652973 | -0.477653 | 3.23E-05 | hypomethylated |
| cg25758828 | 0.71113 | 0.510685946 | -0.477677 | 0.000417 | hypomethylated |
| cg13693256 | 0.70431 | 0.505769189 | -0.477731 | 5.58E-05 | hypomethylated |
| cg26799474 | 0.78141 | 0.561135135 | -0.477731 | 0.000626 | hypomethylated |
| cg13512951 | 0.57346 | 0.411797297 | -0.477758 | 6.62E-05 | hypomethylated |
| cg10773972 | 0.80625 | 0.578891892 | -0.477933 | 5.31E-05 | hypomethylated |
| cg21604970 | 0.84184 | 0.604428649 | -0.477974 | 1.44E-05 | hypomethylated |
| cg07126115 | 0.53318 | 0.382807027 | -0.478005 | 0.003571 | hypomethylated |
| cg10272520 | 0.93832 | 0.673681622 | -0.478013 | 1.88E-06 | hypomethylated |
| cg24170085 | 0.5628  | 0.404047568 | -0.478097 | 0.000805 | hypomethylated |
| cg19988367 | 0.52241 | 0.375042162 | -0.47813  | 0.000214 | hypomethylated |
| cg06348773 | 0.47877 | 0.343710811 | -0.478138 | 0.000335 | hypomethylated |
| cg26110900 | 0.84746 | 0.608374595 | -0.478185 | 4.47E-05 | hypomethylated |
| cg13772414 | 0.77979 | 0.559794054 | -0.478189 | 0.000681 | hypomethylated |
| cg18975130 | 0.85052 | 0.610566486 | -0.478197 | 9.19E-06 | hypomethylated |
| cg06819373 | 0.73563 | 0.528086486 | -0.478206 | 0.000132 | hypomethylated |
| cg13829089 | 0.7029  | 0.504576216 | -0.478247 | 0.000741 | hypomethylated |
| cg05361415 | 0.76963 | 0.552406486 | -0.478435 | 1.50E-05 | hypomethylated |
| cg22388417 | 0.8585  | 0.616128649 | -0.478587 | 0.000117 | hypomethylated |
| cg04014685 | 0.87271 | 0.626321622 | -0.478599 | 3.64E-06 | hypomethylated |
| cg08985530 | 0.82914 | 0.595043243 | -0.478621 | 2.32E-05 | hypomethylated |
| cg06621452 | 0.76243 | 0.547167027 | -0.478624 | 5.45E-05 | hypomethylated |
| cg06549238 | 0.89764 | 0.64417027  | -0.478695 | 0.000155 | hypomethylated |
| cg18949415 | 0.52758 | 0.378595676 | -0.478732 | 4.26E-05 | hypomethylated |
| cg01577029 | 0.78849 | 0.565754595 | -0.478916 | 3.40E-05 | hypomethylated |
| cg13488851 | 0.86674 | 0.621894595 | -0.478929 | 4.24E-06 | hypomethylated |
| cg06267075 | 0.71943 | 0.516175135 | -0.478994 | 0.000287 | hypomethylated |
| cg19373545 | 0.87874 | 0.630428649 | -0.479103 | 9.16E-05 | hypomethylated |
| cg22089361 | 0.79422 | 0.569735676 | -0.479246 | 3.49E-05 | hypomethylated |
| cg00840694 | 0.66737 | 0.478732973 | -0.479266 | 1.18E-05 | hypomethylated |
| cg02499614 | 0.43639 | 0.313024865 | -0.479341 | 1.28E-05 | hypomethylated |
| cg13295878 | 0.83266 | 0.597255676 | -0.479379 | 1.44E-05 | hypomethylated |
| cg13697968 | 0.87083 | 0.62463027  | -0.479389 | 4.73E-06 | hypomethylated |
| cg03885055 | 0.55661 | 0.399244324 | -0.479395 | 0.000313 | hypomethylated |
| cg12941931 | 0.55978 | 0.401502162 | -0.479452 | 0.001423 | hypomethylated |
| cg16549596 | 0.73801 | 0.529303243 | -0.479546 | 4.60E-06 | hypomethylated |
| cg11362820 | 0.49249 | 0.353212432 | -0.479558 | 0.001511 | hypomethylated |
| cg11201177 | 0.79109 | 0.567307027 | -0.479712 | 7.52E-06 | hypomethylated |
| cg05845141 | 0.76225 | 0.546605946 | -0.479763 | 3.59E-06 | hypomethylated |
| cg04761746 | 0.51712 | 0.370813514 | -0.479805 | 0.000237 | hypomethylated |
| cg05461841 | 0.42829 | 0.3071      | -0.479879 | 7.65E-05 | hypomethylated |

|            |         |             |           |          |                |
|------------|---------|-------------|-----------|----------|----------------|
| cg24299913 | 0.73998 | 0.530591351 | -0.479885 | 2.71E-05 | hypomethylated |
| cg05663278 | 0.75184 | 0.539084865 | -0.479913 | 0.000374 | hypomethylated |
| cg23971987 | 0.74187 | 0.531921081 | -0.479954 | 6.38E-05 | hypomethylated |
| cg22907295 | 0.61087 | 0.437954054 | -0.480086 | 0.000154 | hypomethylated |
| cg07740599 | 0.74465 | 0.533854054 | -0.480117 | 0.000182 | hypomethylated |
| cg17056676 | 0.52697 | 0.377794595 | -0.480119 | 6.46E-05 | hypomethylated |
| cg19375403 | 0.6231  | 0.446704324 | -0.480143 | 0.006915 | hypomethylated |
| cg20035679 | 0.7442  | 0.533502162 | -0.480196 | 3.67E-05 | hypomethylated |
| cg05105919 | 0.50209 | 0.359924865 | -0.48025  | 0.000893 | hypomethylated |
| cg18665384 | 0.707   | 0.506797297 | -0.480301 | 1.46E-05 | hypomethylated |
| cg20909017 | 0.56219 | 0.40296973  | -0.480386 | 0.003021 | hypomethylated |
| cg16523490 | 0.51387 | 0.368323784 | -0.480429 | 4.76E-05 | hypomethylated |
| cg04547002 | 0.60437 | 0.43318973  | -0.480433 | 0.000193 | hypomethylated |
| cg09911316 | 0.63626 | 0.456015676 | -0.480533 | 4.15E-05 | hypomethylated |
| cg25497530 | 0.75323 | 0.539839459 | -0.48056  | 8.52E-05 | hypomethylated |
| cg04560093 | 0.84183 | 0.603338378 | -0.480562 | 0.000117 | hypomethylated |
| cg09541248 | 0.70544 | 0.505582703 | -0.480576 | 1.26E-05 | hypomethylated |
| cg01905967 | 0.73724 | 0.528307027 | -0.480758 | 0.000256 | hypomethylated |
| cg22166883 | 0.55289 | 0.396185946 | -0.480815 | 6.78E-05 | hypomethylated |
| cg10060191 | 0.66235 | 0.474614595 | -0.480837 | 0.000839 | hypomethylated |
| cg21580456 | 0.81283 | 0.582413514 | -0.48091  | 4.73E-06 | hypomethylated |
| cg16015285 | 0.77032 | 0.551943784 | -0.480937 | 9.57E-06 | hypomethylated |
| cg15100947 | 0.89425 | 0.640740541 | -0.480938 | 3.04E-06 | hypomethylated |
| cg10923018 | 0.81856 | 0.586501622 | -0.480953 | 1.77E-06 | hypomethylated |
| cg19861914 | 0.89239 | 0.639370811 | -0.481021 | 7.32E-06 | hypomethylated |
| cg01033642 | 0.85087 | 0.609607568 | -0.481058 | 3.67E-05 | hypomethylated |
| cg20441130 | 0.72091 | 0.516483784 | -0.481096 | 2.95E-06 | hypomethylated |
| cg17311132 | 0.55857 | 0.400169189 | -0.481128 | 0.000331 | hypomethylated |
| cg19580263 | 0.87858 | 0.629415676 | -0.481161 | 1.54E-05 | hypomethylated |
| cg27031754 | 0.52235 | 0.374210811 | -0.481166 | 0.001212 | hypomethylated |
| cg23303108 | 0.91509 | 0.655555676 | -0.481195 | 2.42E-05 | hypomethylated |
| cg23414330 | 0.45677 | 0.327214054 | -0.481233 | 3.71E-05 | hypomethylated |
| cg00661399 | 0.68477 | 0.490491351 | -0.481392 | 2.57E-05 | hypomethylated |
| cg01997884 | 0.70217 | 0.50294973  | -0.481406 | 0.000557 | hypomethylated |
| cg12705693 | 0.72957 | 0.522575676 | -0.481406 | 0.000145 | hypomethylated |
| cg20488756 | 0.6961  | 0.498545405 | -0.48157  | 5.00E-06 | hypomethylated |
| cg18614510 | 0.60082 | 0.430297838 | -0.481597 | 9.27E-05 | hypomethylated |
| cg23969274 | 0.77471 | 0.554784324 | -0.481729 | 1.39E-05 | hypomethylated |
| cg00868074 | 0.63409 | 0.454074054 | -0.48176  | 1.31E-05 | hypomethylated |
| cg25743482 | 0.82392 | 0.59000973  | -0.481766 | 7.93E-06 | hypomethylated |
| cg07060794 | 0.76886 | 0.550561081 | -0.481818 | 4.94E-05 | hypomethylated |
| cg03666309 | 0.61268 | 0.438696757 | -0.48191  | 3.15E-05 | hypomethylated |
| cg16701133 | 0.82623 | 0.591571892 | -0.48199  | 1.89E-05 | hypomethylated |
| cg16459276 | 0.60656 | 0.434282162 | -0.482018 | 0.002296 | hypomethylated |
| cg04724556 | 0.76368 | 0.546771351 | -0.482031 | 0.00015  | hypomethylated |
| cg06772221 | 0.53324 | 0.381777838 | -0.482052 | 0.000772 | hypomethylated |
| cg06901893 | 0.72911 | 0.52196973  | -0.48217  | 1.58E-05 | hypomethylated |
| cg26508164 | 0.82549 | 0.590956757 | -0.482198 | 4.76E-05 | hypomethylated |
| cg11862144 | 0.93212 | 0.667286486 | -0.482209 | 1.39E-05 | hypomethylated |
| cg18608610 | 0.66159 | 0.473591351 | -0.482295 | 7.52E-06 | hypomethylated |
| cg09260048 | 0.88568 | 0.633982162 | -0.482343 | 8.37E-06 | hypomethylated |
| cg11297227 | 0.59945 | 0.429089189 | -0.482362 | 2.96E-05 | hypomethylated |
| cg19451021 | 0.75393 | 0.539666486 | -0.482362 | 3.44E-05 | hypomethylated |
| cg14161399 | 0.84171 | 0.602447568 | -0.482488 | 1.28E-05 | hypomethylated |
| cg00621646 | 0.83211 | 0.595561081 | -0.482525 | 1.82E-05 | hypomethylated |
| cg02131870 | 0.89778 | 0.642523243 | -0.482613 | 7.62E-06 | hypomethylated |
| cg18564686 | 0.49182 | 0.351975135 | -0.482657 | 0.001314 | hypomethylated |
| cg08091666 | 0.6896  | 0.493474054 | -0.482786 | 1.54E-05 | hypomethylated |



|            |         |             |           |          |                |
|------------|---------|-------------|-----------|----------|----------------|
| cg19531536 | 0.59393 | 0.42501027  | -0.482795 | 5.31E-05 | hypomethylated |
| cg17316966 | 0.7839  | 0.56095027  | -0.482797 | 9.16E-05 | hypomethylated |
| cg09040942 | 0.82231 | 0.588405405 | -0.482872 | 0.000166 | hypomethylated |
| cg20521198 | 0.57885 | 0.414183243 | -0.48292  | 0.000395 | hypomethylated |
| cg09861057 | 0.49863 | 0.35678     | -0.482935 | 0.00071  | hypomethylated |
| cg18640660 | 0.74034 | 0.529721081 | -0.482955 | 3.90E-06 | hypomethylated |
| cg02217022 | 0.68397 | 0.489385405 | -0.482962 | 3.95E-05 | hypomethylated |
| cg05316065 | 0.54418 | 0.389363243 | -0.482967 | 9.72E-05 | hypomethylated |
| cg10743102 | 0.77464 | 0.554243243 | -0.483007 | 0.000474 | hypomethylated |
| cg13172432 | 0.67773 | 0.484895135 | -0.483038 | 5.72E-05 | hypomethylated |
| cg25403488 | 0.64578 | 0.462021622 | -0.483082 | 9.49E-05 | hypomethylated |
| cg13374701 | 0.93634 | 0.66989027  | -0.483108 | 7.72E-06 | hypomethylated |
| cg00093433 | 0.59812 | 0.427896757 | -0.483172 | 0.00048  | hypomethylated |
| cg14325112 | 0.77872 | 0.557082162 | -0.483215 | 2.67E-05 | hypomethylated |
| cg14413177 | 0.60862 | 0.435392973 | -0.483224 | 1.25E-05 | hypomethylated |
| cg05363382 | 0.66912 | 0.478639459 | -0.483326 | 6.31E-05 | hypomethylated |
| cg01862897 | 0.62411 | 0.446435135 | -0.48335  | 0.000126 | hypomethylated |
| cg06869641 | 0.64422 | 0.460818919 | -0.483354 | 1.38E-05 | hypomethylated |
| cg05991902 | 0.76689 | 0.548521081 | -0.483473 | 2.39E-05 | hypomethylated |
| cg13714378 | 0.77804 | 0.556485405 | -0.4835   | 5.45E-05 | hypomethylated |
| cg08942191 | 0.66036 | 0.472302162 | -0.483543 | 0.000342 | hypomethylated |
| cg21491443 | 0.89785 | 0.642137297 | -0.483593 | 1.93E-06 | hypomethylated |
| cg05728596 | 0.86384 | 0.617782703 | -0.483665 | 1.62E-05 | hypomethylated |
| cg00543474 | 0.5183  | 0.370661622 | -0.483685 | 0.00095  | hypomethylated |
| cg22421417 | 0.71779 | 0.513322703 | -0.483696 | 6.62E-05 | hypomethylated |
| cg15774065 | 0.56729 | 0.405692973 | -0.483698 | 3.32E-05 | hypomethylated |
| cg04285710 | 0.69216 | 0.49497027  | -0.483764 | 8.63E-05 | hypomethylated |
| cg18293437 | 0.70425 | 0.503607568 | -0.483788 | 3.07E-05 | hypomethylated |
| cg08468599 | 0.74851 | 0.535246486 | -0.483818 | 0.000101 | hypomethylated |
| cg15579389 | 0.52229 | 0.373443784 | -0.48396  | 0.003506 | hypomethylated |
| cg06884882 | 0.44765 | 0.320072973 | -0.48397  | 0.000588 | hypomethylated |
| cg25440893 | 0.40131 | 0.286923784 | -0.48405  | 0.000123 | hypomethylated |
| cg16337430 | 0.55879 | 0.399507027 | -0.484085 | 0.002026 | hypomethylated |
| cg24537836 | 0.64122 | 0.458392432 | -0.484236 | 0.000772 | hypomethylated |
| cg09071093 | 0.54125 | 0.386921081 | -0.484256 | 0.000219 | hypomethylated |
| cg19161251 | 0.87233 | 0.623594595 | -0.484266 | 7.52E-06 | hypomethylated |
| cg11844042 | 0.87333 | 0.624294054 | -0.484301 | 4.12E-06 | hypomethylated |
| cg08715862 | 0.52763 | 0.377167568 | -0.484321 | 0.000354 | hypomethylated |
| cg26282283 | 0.55689 | 0.398076216 | -0.484348 | 0.000374 | hypomethylated |
| cg22732126 | 0.5863  | 0.419088649 | -0.484384 | 1.80E-05 | hypomethylated |
| cg05295023 | 0.78196 | 0.558934595 | -0.484415 | 6.02E-07 | hypomethylated |
| cg06310712 | 0.85276 | 0.609526486 | -0.484451 | 2.87E-06 | hypomethylated |
| cg05447102 | 0.82564 | 0.590101081 | -0.484551 | 1.99E-05 | hypomethylated |
| cg09030187 | 0.56343 | 0.402688649 | -0.484572 | 0.000445 | hypomethylated |
| cg26689077 | 0.53818 | 0.384615135 | -0.484673 | 0.004365 | hypomethylated |
| cg03096107 | 0.40322 | 0.288161081 | -0.484692 | 0.00012  | hypomethylated |
| cg06647928 | 0.49948 | 0.35694973  | -0.484706 | 6.38E-05 | hypomethylated |
| cg00325139 | 0.67049 | 0.47916     | -0.484708 | 0.000893 | hypomethylated |
| cg01769428 | 0.49897 | 0.356583243 | -0.484714 | 9.72E-05 | hypomethylated |
| cg04843461 | 0.73113 | 0.52248973  | -0.484725 | 2.71E-05 | hypomethylated |
| cg15050051 | 0.71044 | 0.507686486 | -0.484775 | 0.000523 | hypomethylated |
| cg04961225 | 0.7315  | 0.522735676 | -0.484776 | 0.00095  | hypomethylated |
| cg20932150 | 0.41885 | 0.299297297 | -0.484854 | 1.01E-05 | hypomethylated |
| cg01759628 | 0.53582 | 0.382869189 | -0.484897 | 0.000306 | hypomethylated |
| cg02643667 | 0.84692 | 0.605089189 | -0.485078 | 4.36E-06 | hypomethylated |
| cg03453870 | 0.76855 | 0.549069189 | -0.485151 | 7.12E-05 | hypomethylated |
| cg19106326 | 0.71861 | 0.513381622 | -0.485177 | 0.00028  | hypomethylated |
| cg16120196 | 0.67838 | 0.484636216 | -0.485191 | 3.49E-05 | hypomethylated |

|            |         |             |           |          |                |
|------------|---------|-------------|-----------|----------|----------------|
| cg04189320 | 0.74999 | 0.53576973  | -0.485258 | 6.39E-06 | hypomethylated |
| cg04626878 | 0.47109 | 0.336531892 | -0.485259 | 0.001481 | hypomethylated |
| cg18844900 | 0.79485 | 0.567753514 | -0.485418 | 5.73E-06 | hypomethylated |
| cg26551026 | 0.85701 | 0.61214973  | -0.485427 | 1.46E-05 | hypomethylated |
| cg15664152 | 0.41881 | 0.299140541 | -0.485472 | 0.005085 | hypomethylated |
| cg17384457 | 0.58962 | 0.421139459 | -0.485487 | 1.75E-05 | hypomethylated |
| cg06743312 | 0.44266 | 0.316165405 | -0.485519 | 5.72E-05 | hypomethylated |
| cg16856722 | 0.89476 | 0.639050811 | -0.48557  | 2.95E-06 | hypomethylated |
| cg15692360 | 0.6086  | 0.434668649 | -0.485578 | 5.38E-05 | hypomethylated |
| cg09968361 | 0.67243 | 0.480244324 | -0.485616 | 2.45E-05 | hypomethylated |
| cg23670779 | 0.78263 | 0.558944324 | -0.485626 | 5.19E-05 | hypomethylated |
| cg02495767 | 0.82061 | 0.585986486 | -0.485829 | 2.27E-05 | hypomethylated |
| cg06873564 | 0.84195 | 0.601189189 | -0.485915 | 1.58E-05 | hypomethylated |
| cg24067652 | 0.79779 | 0.569656216 | -0.485918 | 2.78E-05 | hypomethylated |
| cg25310700 | 0.46405 | 0.331325946 | -0.486029 | 0.000251 | hypomethylated |
| cg15159104 | 0.5015  | 0.358059459 | -0.486051 | 0.003225 | hypomethylated |
| cg09214398 | 0.88962 | 0.635167027 | -0.486053 | 1.89E-05 | hypomethylated |
| cg19464524 | 0.521   | 0.371924324 | -0.486274 | 0.004059 | hypomethylated |
| cg26081974 | 0.90317 | 0.644651892 | -0.486477 | 2.04E-05 | hypomethylated |
| cg16661143 | 0.72616 | 0.518302703 | -0.486493 | 1.71E-05 | hypomethylated |
| cg03029752 | 0.68328 | 0.487693514 | -0.486502 | 1.09E-05 | hypomethylated |
| cg09080444 | 0.67727 | 0.483389189 | -0.486546 | 2.64E-05 | hypomethylated |
| cg22708944 | 0.79369 | 0.566445946 | -0.486637 | 3.57E-05 | hypomethylated |
| cg14120703 | 0.69084 | 0.493036216 | -0.486658 | 0.000193 | hypomethylated |
| cg02006134 | 0.57492 | 0.410292432 | -0.486709 | 0.001481 | hypomethylated |
| cg19573230 | 0.85115 | 0.607422703 | -0.486713 | 7.32E-06 | hypomethylated |
| cg18198461 | 0.48253 | 0.344342703 | -0.486774 | 9.27E-05 | hypomethylated |
| cg16919680 | 0.72736 | 0.519043243 | -0.486815 | 0.000797 | hypomethylated |
| cg00375608 | 0.89913 | 0.641541081 | -0.486988 | 5.00E-06 | hypomethylated |
| cg25407528 | 0.63791 | 0.455155135 | -0.486995 | 0.000262 | hypomethylated |
| cg17379860 | 0.50491 | 0.36022     | -0.487148 | 1.06E-05 | hypomethylated |
| cg25271976 | 0.78076 | 0.556998919 | -0.487205 | 8.37E-06 | hypomethylated |
| cg00748226 | 0.66463 | 0.474144324 | -0.487225 | 1.80E-05 | hypomethylated |
| cg07492281 | 0.85692 | 0.611273514 | -0.487342 | 1.29E-06 | hypomethylated |
| cg14839558 | 0.93572 | 0.667484324 | -0.487343 | 6.57E-06 | hypomethylated |
| cg06431681 | 0.82581 | 0.589077297 | -0.487353 | 1.60E-05 | hypomethylated |
| cg07095737 | 0.68014 | 0.485164324 | -0.487358 | 5.65E-05 | hypomethylated |
| cg12911952 | 0.80803 | 0.576384324 | -0.487378 | 1.15E-05 | hypomethylated |
| cg05036153 | 0.48674 | 0.347200541 | -0.487382 | 0.000137 | hypomethylated |
| cg24696728 | 0.81417 | 0.580727568 | -0.487469 | 8.95E-06 | hypomethylated |
| cg27409771 | 0.39872 | 0.284396216 | -0.487474 | 0.000123 | hypomethylated |
| cg08210297 | 0.79179 | 0.564751351 | -0.487502 | 4.60E-06 | hypomethylated |
| cg03469682 | 0.80655 | 0.575269189 | -0.487527 | 4.47E-05 | hypomethylated |
| cg15132169 | 0.52488 | 0.374331892 | -0.48767  | 0.001118 | hypomethylated |
| cg08009669 | 0.44674 | 0.318596757 | -0.487704 | 0.006451 | hypomethylated |
| cg11097954 | 0.61511 | 0.438641622 | -0.487802 | 0.001153 | hypomethylated |
| cg16306870 | 0.74536 | 0.531468649 | -0.487953 | 0.000667 | hypomethylated |
| cg08306303 | 0.89639 | 0.639131351 | -0.488014 | 8.83E-06 | hypomethylated |
| cg24925163 | 0.65338 | 0.465818919 | -0.488153 | 4.60E-06 | hypomethylated |
| cg17941109 | 0.74104 | 0.528268649 | -0.48828  | 7.42E-06 | hypomethylated |
| cg23568538 | 0.60672 | 0.43248973  | -0.488365 | 5.72E-05 | hypomethylated |
| cg20156116 | 0.48575 | 0.346235676 | -0.48846  | 0.000857 | hypomethylated |
| cg22352499 | 0.81786 | 0.582851351 | -0.488726 | 2.87E-06 | hypomethylated |
| cg12970937 | 0.72249 | 0.514861622 | -0.488793 | 0.000224 | hypomethylated |
| cg08094614 | 0.85161 | 0.606785946 | -0.489005 | 6.75E-06 | hypomethylated |
| cg13340959 | 0.53026 | 0.377803243 | -0.489065 | 1.80E-05 | hypomethylated |
| cg03283080 | 0.73894 | 0.526439459 | -0.48919  | 6.15E-05 | hypomethylated |
| cg26596307 | 0.56906 | 0.40541027  | -0.489198 | 0.000191 | hypomethylated |

|            |         |             |           |          |                |
|------------|---------|-------------|-----------|----------|----------------|
| cg26566898 | 0.52599 | 0.374711351 | -0.489256 | 0.000435 | hypomethylated |
| cg15319824 | 0.90712 | 0.646222162 | -0.489263 | 2.10E-05 | hypomethylated |
| cg03893663 | 0.90448 | 0.644321081 | -0.489309 | 4.12E-06 | hypomethylated |
| cg21303745 | 0.87111 | 0.620543243 | -0.489323 | 6.66E-06 | hypomethylated |
| cg06196689 | 0.76099 | 0.542096216 | -0.489329 | 7.74E-05 | hypomethylated |
| cg11577329 | 0.83363 | 0.593841081 | -0.48933  | 4.01E-06 | hypomethylated |
| cg09057412 | 0.79356 | 0.565276757 | -0.489382 | 8.37E-06 | hypomethylated |
| cg26495711 | 0.60178 | 0.428663784 | -0.48939  | 1.87E-05 | hypomethylated |
| cg18818949 | 0.73823 | 0.525851892 | -0.489414 | 5.06E-05 | hypomethylated |
| cg26530341 | 0.80203 | 0.571295135 | -0.48942  | 9.49E-05 | hypomethylated |
| cg21156590 | 0.82867 | 0.590247568 | -0.489478 | 1.80E-05 | hypomethylated |
| cg15073164 | 0.7677  | 0.546812432 | -0.489497 | 2.05E-06 | hypomethylated |
| cg15059474 | 0.64819 | 0.46166     | -0.489586 | 0.000109 | hypomethylated |
| cg07696099 | 0.70627 | 0.503019459 | -0.489606 | 0.00012  | hypomethylated |
| cg06688014 | 0.3975  | 0.283090811 | -0.48969  | 4.31E-05 | hypomethylated |
| cg00599530 | 0.51078 | 0.363742703 | -0.489784 | 0.00024  | hypomethylated |
| cg01880463 | 0.54982 | 0.391541622 | -0.489794 | 0.000193 | hypomethylated |
| cg02977443 | 0.72904 | 0.519168108 | -0.489796 | 5.86E-05 | hypomethylated |
| cg12217954 | 0.8153  | 0.58059027  | -0.489811 | 8.42E-05 | hypomethylated |
| cg12157156 | 0.62299 | 0.443629189 | -0.489855 | 1.60E-05 | hypomethylated |
| cg03678566 | 0.78213 | 0.556949189 | -0.489863 | 1.66E-05 | hypomethylated |
| cg08454125 | 0.53349 | 0.379894054 | -0.489864 | 3.95E-05 | hypomethylated |
| cg16755251 | 0.92794 | 0.660771892 | -0.489879 | 2.71E-06 | hypomethylated |
| cg04250837 | 0.80716 | 0.574758919 | -0.489898 | 9.95E-05 | hypomethylated |
| cg18801579 | 0.82314 | 0.586131351 | -0.489914 | 1.46E-05 | hypomethylated |
| cg25737218 | 0.77093 | 0.548919459 | -0.490005 | 5.58E-06 | hypomethylated |
| cg15026767 | 0.72567 | 0.516687568 | -0.490021 | 1.31E-05 | hypomethylated |
| cg14036402 | 0.44694 | 0.318210811 | -0.490098 | 0.001164 | hypomethylated |
| cg08919846 | 0.90251 | 0.642564324 | -0.490102 | 2.54E-05 | hypomethylated |
| cg21690505 | 0.72858 | 0.518725405 | -0.490116 | 6.75E-06 | hypomethylated |
| cg04388548 | 0.61359 | 0.436850811 | -0.490134 | 1.42E-05 | hypomethylated |
| cg07161179 | 0.6365  | 0.453143784 | -0.490192 | 0.000147 | hypomethylated |
| cg12019109 | 0.84484 | 0.601455135 | -0.490221 | 4.24E-06 | hypomethylated |
| cg09485853 | 0.6315  | 0.449556757 | -0.490279 | 0.000187 | hypomethylated |
| cg08804626 | 0.93055 | 0.662432973 | -0.490309 | 1.26E-06 | hypomethylated |
| cg05405389 | 0.70628 | 0.50274     | -0.490428 | 0.000126 | hypomethylated |
| cg08827454 | 0.65015 | 0.462776757 | -0.490456 | 0.000575 | hypomethylated |
| cg13093389 | 0.68043 | 0.484317838 | -0.490493 | 5.58E-05 | hypomethylated |
| cg18449135 | 0.90593 | 0.644803784 | -0.490539 | 2.23E-06 | hypomethylated |
| cg20636714 | 0.74976 | 0.533632432 | -0.490583 | 1.52E-05 | hypomethylated |
| cg13845858 | 0.77981 | 0.55501027  | -0.490608 | 1.93E-06 | hypomethylated |
| cg03761477 | 0.52486 | 0.373537838 | -0.490678 | 0.001875 | hypomethylated |
| cg13882377 | 0.53546 | 0.381058378 | -0.490767 | 0.000148 | hypomethylated |
| cg21022906 | 0.8006  | 0.56974     | -0.490778 | 1.28E-05 | hypomethylated |
| cg15261730 | 0.55902 | 0.397818919 | -0.490788 | 0.000116 | hypomethylated |
| cg14760797 | 0.7607  | 0.541315676 | -0.490857 | 0.000454 | hypomethylated |
| cg12018888 | 0.61764 | 0.439505946 | -0.490884 | 2.71E-05 | hypomethylated |
| cg26907768 | 0.29537 | 0.210178919 | -0.490905 | 0.00064  | hypomethylated |
| cg04811592 | 0.81966 | 0.583245405 | -0.490923 | 6.01E-05 | hypomethylated |
| cg05996671 | 0.7028  | 0.500061081 | -0.49101  | 3.81E-05 | hypomethylated |
| cg11839815 | 0.82008 | 0.583506486 | -0.491016 | 5.06E-05 | hypomethylated |
| cg18147048 | 0.87135 | 0.619985405 | -0.491018 | 6.78E-05 | hypomethylated |
| cg18126802 | 0.73963 | 0.52625027  | -0.491055 | 0.0002   | hypomethylated |
| cg00732383 | 0.55963 | 0.398155135 | -0.491143 | 0.000681 | hypomethylated |
| cg26470696 | 0.74883 | 0.532745946 | -0.491191 | 5.89E-06 | hypomethylated |
| cg14459021 | 0.94904 | 0.675181622 | -0.491193 | 9.82E-06 | hypomethylated |
| cg09649347 | 0.64231 | 0.456945946 | -0.491246 | 0.000147 | hypomethylated |
| cg07369606 | 0.77846 | 0.553783243 | -0.491302 | 1.42E-05 | hypomethylated |

|            |         |             |           |          |                |
|------------|---------|-------------|-----------|----------|----------------|
| cg24554151 | 0.90474 | 0.643616216 | -0.491303 | 2.36E-06 | hypomethylated |
| cg14003265 | 0.44126 | 0.313868649 | -0.491468 | 0.000551 | hypomethylated |
| cg14059257 | 0.65572 | 0.466405946 | -0.491494 | 5.58E-05 | hypomethylated |
| cg10499172 | 0.46766 | 0.332634054 | -0.491524 | 0.00035  | hypomethylated |
| cg07186199 | 0.67813 | 0.48232973  | -0.491542 | 0.00013  | hypomethylated |
| cg06339706 | 0.64938 | 0.461871892 | -0.49157  | 0.000191 | hypomethylated |
| cg21756208 | 0.52965 | 0.376705946 | -0.491601 | 9.16E-05 | hypomethylated |
| cg18246298 | 0.74519 | 0.530004324 | -0.491604 | 2.81E-05 | hypomethylated |
| cg16218715 | 0.48018 | 0.341498919 | -0.491694 | 1.94E-05 | hypomethylated |
| cg03956820 | 0.5028  | 0.35756973  | -0.49176  | 0.00097  | hypomethylated |
| cg24078695 | 0.84424 | 0.600384865 | -0.491766 | 2.87E-06 | hypomethylated |
| cg20326647 | 0.9087  | 0.646191351 | -0.491843 | 0.000124 | hypomethylated |
| cg07100542 | 0.49868 | 0.354618919 | -0.491845 | 0.001212 | hypomethylated |
| cg20625334 | 0.81477 | 0.579346486 | -0.491966 | 2.32E-05 | hypomethylated |
| cg02997796 | 0.67471 | 0.47975027  | -0.491984 | 8.63E-05 | hypomethylated |
| cg10950111 | 0.80548 | 0.572722162 | -0.492013 | 3.49E-05 | hypomethylated |
| cg02560081 | 0.67863 | 0.482517297 | -0.492045 | 0.000287 | hypomethylated |
| cg02389859 | 0.61389 | 0.436484865 | -0.492049 | 7.12E-06 | hypomethylated |
| cg21519058 | 0.59755 | 0.424797297 | -0.492285 | 6.31E-05 | hypomethylated |
| cg07012178 | 0.77327 | 0.549712432 | -0.492295 | 3.79E-06 | hypomethylated |
| cg13365753 | 0.71701 | 0.509714054 | -0.492305 | 6.93E-06 | hypomethylated |
| cg17274742 | 0.72447 | 0.514953514 | -0.492484 | 0.000107 | hypomethylated |
| cg16332435 | 0.84109 | 0.597776216 | -0.492655 | 4.70E-05 | hypomethylated |
| cg03628441 | 0.7934  | 0.563862162 | -0.492706 | 4.12E-06 | hypomethylated |
| cg18322822 | 0.84388 | 0.599723784 | -0.49274  | 8.59E-07 | hypomethylated |
| cg08782899 | 0.71986 | 0.511584324 | -0.492744 | 1.93E-06 | hypomethylated |
| cg03129324 | 0.41642 | 0.295933514 | -0.492766 | 0.000293 | hypomethylated |
| cg22121647 | 0.72054 | 0.512012432 | -0.4929   | 0.00014  | hypomethylated |
| cg25541968 | 0.58558 | 0.416095676 | -0.492951 | 0.000122 | hypomethylated |
| cg04717143 | 0.59587 | 0.423399459 | -0.492978 | 0.000445 | hypomethylated |
| cg02854937 | 0.36333 | 0.258158919 | -0.493021 | 0.000454 | hypomethylated |
| cg02650512 | 0.71325 | 0.506773514 | -0.493067 | 3.07E-05 | hypomethylated |
| cg25475538 | 0.69295 | 0.492332973 | -0.493117 | 1.11E-05 | hypomethylated |
| cg07771160 | 0.67606 | 0.480323784 | -0.493144 | 0.000485 | hypomethylated |
| cg03607573 | 0.6674  | 0.474157297 | -0.493186 | 0.000138 | hypomethylated |
| cg17435683 | 0.6032  | 0.428538919 | -0.49321  | 0.000154 | hypomethylated |
| cg19885306 | 0.44384 | 0.315322162 | -0.493213 | 0.00028  | hypomethylated |
| cg18728264 | 0.66678 | 0.473698378 | -0.493242 | 0.000224 | hypomethylated |
| cg04157272 | 0.85581 | 0.607918919 | -0.493412 | 4.15E-05 | hypomethylated |
| cg16325826 | 0.93777 | 0.666123784 | -0.493444 | 2.30E-05 | hypomethylated |
| cg06624951 | 0.65823 | 0.467540541 | -0.4935   | 4.47E-05 | hypomethylated |
| cg24425149 | 0.4374  | 0.310664865 | -0.493594 | 0.000772 | hypomethylated |
| cg18615133 | 0.65163 | 0.462820541 | -0.4936   | 0.000501 | hypomethylated |
| cg10663897 | 0.73834 | 0.524393514 | -0.493635 | 0.000256 | hypomethylated |
| cg13242944 | 0.82071 | 0.582858378 | -0.493727 | 2.16E-06 | hypomethylated |
| cg00373436 | 0.5957  | 0.423058378 | -0.493729 | 3.32E-05 | hypomethylated |
| cg21157904 | 0.55167 | 0.391768108 | -0.493806 | 0.000129 | hypomethylated |
| cg17638841 | 0.55863 | 0.396699459 | -0.493847 | 1.84E-05 | hypomethylated |
| cg12983285 | 0.55558 | 0.394516216 | -0.49391  | 0.000485 | hypomethylated |
| cg10687219 | 0.90296 | 0.64117027  | -0.493955 | 2.61E-05 | hypomethylated |
| cg00238283 | 0.72568 | 0.515265946 | -0.494016 | 3.85E-05 | hypomethylated |
| cg14761989 | 0.535   | 0.379864865 | -0.494053 | 8.42E-05 | hypomethylated |
| cg05235525 | 0.57351 | 0.407207027 | -0.494056 | 1.92E-05 | hypomethylated |
| cg26206185 | 0.54897 | 0.389777838 | -0.494075 | 5.06E-05 | hypomethylated |
| cg21058511 | 0.72442 | 0.514314595 | -0.494175 | 0.000112 | hypomethylated |
| cg03531754 | 0.74966 | 0.532227027 | -0.494195 | 8.15E-06 | hypomethylated |
| cg04483701 | 0.64563 | 0.458367568 | -0.494203 | 3.00E-05 | hypomethylated |
| cg25004838 | 0.86459 | 0.613816757 | -0.494208 | 4.05E-05 | hypomethylated |

|            |         |             |           |          |                |
|------------|---------|-------------|-----------|----------|----------------|
| cg14691971 | 0.80741 | 0.573221622 | -0.494208 | 0.000161 | hypomethylated |
| cg06641593 | 0.87662 | 0.622355135 | -0.494214 | 7.72E-06 | hypomethylated |
| cg02493905 | 0.70291 | 0.498975135 | -0.494372 | 2.24E-05 | hypomethylated |
| cg18356190 | 0.53742 | 0.381495135 | -0.494385 | 0.001107 | hypomethylated |
| cg10548968 | 0.74263 | 0.52712973  | -0.494486 | 2.64E-06 | hypomethylated |
| cg14924160 | 0.85662 | 0.60802973  | -0.494513 | 2.32E-05 | hypomethylated |
| cg05260877 | 0.68164 | 0.483808649 | -0.494573 | 1.42E-05 | hypomethylated |
| cg05798627 | 0.71066 | 0.504392432 | -0.494613 | 6.93E-06 | hypomethylated |
| cg16567056 | 0.54369 | 0.385878919 | -0.494636 | 0.007667 | hypomethylated |
| cg20708135 | 0.74669 | 0.529956216 | -0.494636 | 3.00E-05 | hypomethylated |
| cg13865610 | 0.77201 | 0.54788     | -0.49476  | 0.000191 | hypomethylated |
| cg19194645 | 0.72812 | 0.51673027  | -0.494765 | 2.05E-06 | hypomethylated |
| cg12313969 | 0.87682 | 0.622257297 | -0.494769 | 3.23E-05 | hypomethylated |
| cg09695261 | 0.95519 | 0.677872432 | -0.494774 | 2.42E-06 | hypomethylated |
| cg22329743 | 0.80175 | 0.568976216 | -0.494784 | 3.49E-06 | hypomethylated |
| cg08710911 | 0.47343 | 0.33596973  | -0.49482  | 0.000506 | hypomethylated |
| cg03884543 | 0.75186 | 0.533552973 | -0.494833 | 8.37E-06 | hypomethylated |
| cg16764778 | 0.54234 | 0.384858919 | -0.494868 | 0.000426 | hypomethylated |
| cg02899870 | 0.66779 | 0.473857838 | -0.49494  | 9.27E-05 | hypomethylated |
| cg25338818 | 0.84419 | 0.59901027  | -0.494987 | 4.24E-06 | hypomethylated |
| cg04577212 | 0.44986 | 0.319203243 | -0.495001 | 0.002147 | hypomethylated |
| cg04115307 | 0.61531 | 0.436558919 | -0.495137 | 5.43E-06 | hypomethylated |
| cg22014579 | 0.88718 | 0.62942973  | -0.495182 | 6.39E-06 | hypomethylated |
| cg04650653 | 0.82267 | 0.583626486 | -0.495268 | 2.89E-05 | hypomethylated |
| cg15705746 | 0.57675 | 0.409156216 | -0.495294 | 0.00024  | hypomethylated |
| cg07177437 | 0.82532 | 0.585473514 | -0.49535  | 4.36E-06 | hypomethylated |
| cg01591152 | 0.57739 | 0.409562162 | -0.495464 | 3.07E-05 | hypomethylated |
| cg13888509 | 0.73074 | 0.518321081 | -0.495512 | 3.69E-06 | hypomethylated |
| cg08621168 | 0.87261 | 0.618941081 | -0.495535 | 9.82E-06 | hypomethylated |
| cg26204417 | 0.90766 | 0.6438      | -0.495539 | 2.95E-06 | hypomethylated |
| cg15067015 | 0.6319  | 0.44818     | -0.495618 | 4.94E-05 | hypomethylated |
| cg00355019 | 0.85346 | 0.605243784 | -0.495807 | 1.18E-05 | hypomethylated |
| cg23506979 | 0.67634 | 0.479613514 | -0.495876 | 2.45E-05 | hypomethylated |
| cg20715809 | 0.63442 | 0.449876216 | -0.49591  | 2.64E-06 | hypomethylated |
| cg02623200 | 0.48565 | 0.344380541 | -0.495913 | 0.00125  | hypomethylated |
| cg04714466 | 0.80252 | 0.569063243 | -0.495948 | 2.64E-05 | hypomethylated |
| cg04463607 | 0.73671 | 0.522396757 | -0.495951 | 5.45E-05 | hypomethylated |
| cg03748603 | 0.76981 | 0.545861622 | -0.495967 | 6.78E-05 | hypomethylated |
| cg16348668 | 0.82866 | 0.58759027  | -0.49597  | 2.71E-05 | hypomethylated |
| cg24881334 | 0.7067  | 0.501106486 | -0.495981 | 0.000528 | hypomethylated |
| cg26037936 | 0.73117 | 0.518448108 | -0.496007 | 4.36E-05 | hypomethylated |
| cg15697852 | 0.75865 | 0.537919459 | -0.496044 | 0.000426 | hypomethylated |
| cg15975980 | 0.84915 | 0.602078919 | -0.496067 | 3.04E-06 | hypomethylated |
| cg21010701 | 0.84788 | 0.601177838 | -0.496068 | 1.54E-06 | hypomethylated |
| cg14017402 | 0.56102 | 0.397754054 | -0.496176 | 0.000417 | hypomethylated |
| cg15952370 | 0.69426 | 0.492179459 | -0.496292 | 0.000163 | hypomethylated |
| cg20667796 | 0.65993 | 0.467802703 | -0.496413 | 4.80E-06 | hypomethylated |
| cg05644480 | 0.55994 | 0.396911892 | -0.496453 | 3.23E-05 | hypomethylated |
| cg17344040 | 0.60592 | 0.429478919 | -0.49654  | 0.00049  | hypomethylated |
| cg07363131 | 0.51597 | 0.365672432 | -0.496735 | 0.000214 | hypomethylated |
| cg01796223 | 0.71965 | 0.51001027  | -0.496769 | 0.000262 | hypomethylated |
| cg27488807 | 0.81443 | 0.577167027 | -0.496802 | 1.42E-05 | hypomethylated |
| cg02570493 | 0.74987 | 0.5314      | -0.496842 | 1.31E-05 | hypomethylated |
| cg03980366 | 0.87546 | 0.620398919 | -0.496845 | 2.42E-06 | hypomethylated |
| cg23507761 | 0.75984 | 0.538458919 | -0.496859 | 6.05E-06 | hypomethylated |
| cg16718760 | 0.79876 | 0.56603027  | -0.496883 | 6.95E-05 | hypomethylated |
| cg07866909 | 0.6325  | 0.448170811 | -0.497017 | 2.71E-05 | hypomethylated |
| cg01099300 | 0.73818 | 0.523021081 | -0.497104 | 3.95E-05 | hypomethylated |

|            |         |             |           |          |                |
|------------|---------|-------------|-----------|----------|----------------|
| cg19234983 | 0.85184 | 0.603498378 | -0.497233 | 1.28E-05 | hypomethylated |
| cg22433862 | 0.88443 | 0.626467027 | -0.497509 | 2.07E-05 | hypomethylated |
| cg20994118 | 0.52899 | 0.374684865 | -0.497563 | 1.75E-05 | hypomethylated |
| cg23843180 | 0.83264 | 0.589755135 | -0.497577 | 2.27E-05 | hypomethylated |
| cg22704780 | 0.62724 | 0.444266486 | -0.497592 | 2.45E-05 | hypomethylated |
| cg04370247 | 0.73722 | 0.52209027  | -0.497796 | 0.000358 | hypomethylated |
| cg11342789 | 0.83951 | 0.594514595 | -0.497835 | 1.58E-06 | hypomethylated |
| cg25040562 | 0.77609 | 0.549577838 | -0.4979   | 1.35E-05 | hypomethylated |
| cg16615508 | 0.73189 | 0.518271351 | -0.497919 | 5.50E-06 | hypomethylated |
| cg21650243 | 0.56894 | 0.402847568 | -0.498042 | 0.000115 | hypomethylated |
| cg15197218 | 0.82726 | 0.585723243 | -0.498122 | 4.01E-06 | hypomethylated |
| cg19279257 | 0.73723 | 0.521979459 | -0.498122 | 0.000262 | hypomethylated |
| cg01702055 | 0.70343 | 0.498044865 | -0.498131 | 0.003021 | hypomethylated |
| cg26625897 | 0.75013 | 0.531071351 | -0.498235 | 9.07E-06 | hypomethylated |
| cg20450318 | 0.62788 | 0.444503243 | -0.498295 | 0.000159 | hypomethylated |
| cg04865113 | 0.51694 | 0.365945946 | -0.498366 | 0.000229 | hypomethylated |
| cg23392390 | 0.75874 | 0.537117838 | -0.498367 | 2.35E-05 | hypomethylated |
| cg26256521 | 0.66079 | 0.467759459 | -0.498425 | 0.000102 | hypomethylated |
| cg12684668 | 0.66596 | 0.471391892 | -0.498509 | 0.000772 | hypomethylated |
| cg17654660 | 0.56293 | 0.398441622 | -0.498587 | 0.000797 | hypomethylated |
| cg15519786 | 0.60608 | 0.42894973  | -0.4987   | 4.05E-05 | hypomethylated |
| cg00660272 | 0.2914  | 0.206235676 | -0.498707 | 0.001786 | hypomethylated |
| cg03014589 | 0.88716 | 0.627696216 | -0.499128 | 5.00E-06 | hypomethylated |
| cg11592230 | 0.72677 | 0.514211351 | -0.499137 | 1.17E-05 | hypomethylated |
| cg08759026 | 0.4572  | 0.323467568 | -0.499204 | 0.000613 | hypomethylated |
| cg03433986 | 0.64389 | 0.45554973  | -0.499206 | 0.000814 | hypomethylated |
| cg02447879 | 0.55909 | 0.395550811 | -0.499218 | 0.000374 | hypomethylated |
| cg08553950 | 0.7496  | 0.53031027  | -0.499284 | 1.62E-05 | hypomethylated |
| cg15686949 | 0.50382 | 0.356415135 | -0.49935  | 0.000313 | hypomethylated |
| cg13419087 | 0.56573 | 0.400185405 | -0.499445 | 7.20E-05 | hypomethylated |
| cg14935626 | 0.44511 | 0.314860541 | -0.499449 | 0.003316 | hypomethylated |
| cg23149881 | 0.74374 | 0.526085405 | -0.499501 | 0.001262 | hypomethylated |
| cg04171808 | 0.72839 | 0.515224865 | -0.499509 | 0.000134 | hypomethylated |
| cg16486109 | 0.81277 | 0.574885405 | -0.499573 | 1.99E-05 | hypomethylated |
| cg08999895 | 0.66958 | 0.473592432 | -0.49961  | 1.21E-05 | hypomethylated |
| cg15565576 | 0.64956 | 0.459431892 | -0.499612 | 4.05E-05 | hypomethylated |
| cg22276685 | 0.76761 | 0.542905405 | -0.499673 | 1.25E-05 | hypomethylated |
| cg09558425 | 0.67478 | 0.477241622 | -0.499697 | 0.000117 | hypomethylated |
| cg15453708 | 0.64366 | 0.455205405 | -0.499781 | 0.000168 | hypomethylated |
| cg02000275 | 0.77334 | 0.546914054 | -0.499789 | 0.00035  | hypomethylated |
| cg02290880 | 0.72483 | 0.512566486 | -0.499904 | 4.26E-05 | hypomethylated |
| cg07611933 | 0.90134 | 0.637374595 | -0.49993  | 3.39E-06 | hypomethylated |
| cg15350899 | 0.53672 | 0.379527027 | -0.499967 | 9.82E-06 | hypomethylated |
| cg12537003 | 0.70742 | 0.500226486 | -0.499986 | 5.45E-05 | hypomethylated |
| cg25318211 | 0.65395 | 0.462392432 | -0.500063 | 0.000148 | hypomethylated |
| cg05503433 | 0.74194 | 0.524603784 | -0.500074 | 3.90E-06 | hypomethylated |
| cg24416660 | 0.67611 | 0.478050811 | -0.500094 | 3.81E-05 | hypomethylated |
| cg02895699 | 0.80893 | 0.571909189 | -0.500229 | 0.000161 | hypomethylated |
| cg26648579 | 0.72346 | 0.511478919 | -0.500238 | 1.94E-05 | hypomethylated |
| cg10322254 | 0.55081 | 0.389416216 | -0.500242 | 0.012333 | hypomethylated |
| cg02780269 | 0.70777 | 0.500349189 | -0.500345 | 0.000374 | hypomethylated |
| cg04213854 | 0.60918 | 0.430614054 | -0.500473 | 4.86E-06 | hypomethylated |
| cg06128161 | 0.55634 | 0.39322973  | -0.500594 | 4.26E-05 | hypomethylated |
| cg08629043 | 0.72893 | 0.515216216 | -0.500602 | 6.62E-05 | hypomethylated |
| cg21809161 | 0.57108 | 0.403630811 | -0.500657 | 1.87E-05 | hypomethylated |
| cg17804071 | 0.73625 | 0.520365946 | -0.500669 | 0.000417 | hypomethylated |
| cg06521247 | 0.81058 | 0.572895676 | -0.500682 | 1.02E-05 | hypomethylated |
| cg15221831 | 0.81219 | 0.573977838 | -0.500822 | 7.93E-06 | hypomethylated |

|            |         |             |           |          |                |
|------------|---------|-------------|-----------|----------|----------------|
| cg10589330 | 0.77307 | 0.546329189 | -0.500829 | 6.22E-06 | hypomethylated |
| cg23570810 | 0.60368 | 0.426604865 | -0.500884 | 0.000107 | hypomethylated |
| cg13261536 | 0.93697 | 0.662104324 | -0.500944 | 8.15E-06 | hypomethylated |
| cg14950321 | 0.64686 | 0.457083243 | -0.500997 | 0.0006   | hypomethylated |
| cg23538064 | 0.57051 | 0.403129189 | -0.50101  | 6.31E-05 | hypomethylated |
| cg26543150 | 0.66295 | 0.468441081 | -0.501032 | 0.000626 | hypomethylated |
| cg25292663 | 0.61874 | 0.437197297 | -0.501049 | 0.000511 | hypomethylated |
| cg04625914 | 0.94989 | 0.67116     | -0.501104 | 2.68E-06 | hypomethylated |
| cg21018997 | 0.8132  | 0.574572432 | -0.501121 | 8.60E-06 | hypomethylated |
| cg03082060 | 0.68363 | 0.483010811 | -0.50116  | 1.37E-05 | hypomethylated |
| cg23253961 | 0.74669 | 0.527551351 | -0.501198 | 0.000168 | hypomethylated |
| cg11680590 | 0.79915 | 0.564587568 | -0.501269 | 5.43E-06 | hypomethylated |
| cg16200531 | 0.752   | 0.531253514 | -0.501332 | 0.000726 | hypomethylated |
| cg22721827 | 0.65369 | 0.461788108 | -0.501376 | 2.85E-05 | hypomethylated |
| cg27059354 | 0.81833 | 0.578051351 | -0.501485 | 2.15E-05 | hypomethylated |
| cg06788764 | 0.87109 | 0.615303243 | -0.501524 | 1.06E-05 | hypomethylated |
| cg23459424 | 0.67697 | 0.478139459 | -0.50166  | 5.31E-05 | hypomethylated |
| cg20820107 | 0.52336 | 0.369622162 | -0.501752 | 0.001912 | hypomethylated |
| cg09990169 | 0.49287 | 0.348078919 | -0.501793 | 1.73E-05 | hypomethylated |
| cg13061767 | 0.91157 | 0.643760541 | -0.501829 | 1.99E-06 | hypomethylated |
| cg10131026 | 0.57395 | 0.405327568 | -0.501837 | 0.000214 | hypomethylated |
| cg00573857 | 0.67948 | 0.479841081 | -0.501874 | 0.000454 | hypomethylated |
| cg24847621 | 0.50321 | 0.355352973 | -0.501908 | 0.000408 | hypomethylated |
| cg02974085 | 0.72769 | 0.513857838 | -0.501955 | 0.000575 | hypomethylated |
| cg10423842 | 0.55796 | 0.393982703 | -0.502029 | 0.000772 | hypomethylated |
| cg13551074 | 0.62805 | 0.443471892 | -0.502037 | 0.00029  | hypomethylated |
| cg16974832 | 0.69475 | 0.490563784 | -0.502053 | 0.000178 | hypomethylated |
| cg15542639 | 0.8903  | 0.628621622 | -0.5021   | 3.39E-06 | hypomethylated |
| cg15690542 | 0.40351 | 0.284898378 | -0.502157 | 6.95E-05 | hypomethylated |
| cg05704183 | 0.74356 | 0.524957838 | -0.502248 | 3.95E-05 | hypomethylated |
| cg14024579 | 0.51672 | 0.3648      | -0.502277 | 0.000287 | hypomethylated |
| cg20305578 | 0.66617 | 0.470300541 | -0.502307 | 6.78E-05 | hypomethylated |
| cg17865555 | 0.80907 | 0.571174054 | -0.502334 | 6.15E-05 | hypomethylated |
| cg06375539 | 0.85681 | 0.604864324 | -0.502364 | 2.79E-06 | hypomethylated |
| cg15332871 | 0.69158 | 0.488189189 | -0.502456 | 1.99E-06 | hypomethylated |
| cg24136690 | 0.74269 | 0.524258378 | -0.502482 | 6.46E-05 | hypomethylated |
| cg05328461 | 0.75654 | 0.534021081 | -0.50252  | 1.01E-05 | hypomethylated |
| cg08106792 | 0.52772 | 0.372502162 | -0.502524 | 0.000112 | hypomethylated |
| cg02301528 | 0.57295 | 0.404422162 | -0.502547 | 0.000102 | hypomethylated |
| cg04713108 | 0.76005 | 0.536447568 | -0.502657 | 1.68E-05 | hypomethylated |
| cg25446789 | 0.71077 | 0.501648108 | -0.502707 | 0.000805 | hypomethylated |
| cg07359183 | 0.84624 | 0.597221081 | -0.502802 | 6.22E-06 | hypomethylated |
| cg19735151 | 0.90727 | 0.640281081 | -0.502827 | 3.04E-06 | hypomethylated |
| cg02520707 | 0.84029 | 0.592994595 | -0.502868 | 1.09E-05 | hypomethylated |
| cg00743081 | 0.67257 | 0.47463027  | -0.50288  | 0.000517 | hypomethylated |
| cg04801085 | 0.83508 | 0.589281622 | -0.502957 | 3.19E-05 | hypomethylated |
| cg09575442 | 0.76219 | 0.537837297 | -0.502981 | 3.85E-05 | hypomethylated |
| cg20938170 | 0.66738 | 0.470924865 | -0.503012 | 7.72E-06 | hypomethylated |
| cg13936846 | 0.83482 | 0.589067027 | -0.503033 | 4.05E-05 | hypomethylated |
| cg26590603 | 0.84693 | 0.597584865 | -0.503099 | 7.93E-06 | hypomethylated |
| cg09567048 | 0.78506 | 0.553904865 | -0.503165 | 2.71E-05 | hypomethylated |
| cg26531231 | 0.8735  | 0.616267027 | -0.503252 | 7.32E-06 | hypomethylated |
| cg16384957 | 0.92194 | 0.650425946 | -0.503288 | 1.14E-05 | hypomethylated |
| cg14884828 | 0.71904 | 0.507274054 | -0.503307 | 0.000613 | hypomethylated |
| cg01540203 | 0.70564 | 0.49782     | -0.503308 | 1.05E-06 | hypomethylated |
| cg21497082 | 0.68274 | 0.481615135 | -0.503456 | 1.99E-05 | hypomethylated |
| cg24465329 | 0.79228 | 0.558826486 | -0.50361  | 5.45E-05 | hypomethylated |
| cg07369374 | 0.74199 | 0.52335027  | -0.503623 | 1.45E-06 | hypomethylated |

|            |         |             |           |          |                |
|------------|---------|-------------|-----------|----------|----------------|
| cg02314896 | 0.51188 | 0.361042162 | -0.503638 | 7.12E-06 | hypomethylated |
| cg09716807 | 0.55058 | 0.388337838 | -0.50364  | 0.000163 | hypomethylated |
| cg26089541 | 0.5551  | 0.3915      | -0.503735 | 3.67E-05 | hypomethylated |
| cg10853949 | 0.78496 | 0.5536      | -0.503775 | 6.05E-06 | hypomethylated |
| cg16897462 | 0.50407 | 0.355492432 | -0.503805 | 0.004526 | hypomethylated |
| cg05437648 | 0.59059 | 0.416438378 | -0.504054 | 3.62E-05 | hypomethylated |
| cg20414364 | 0.54113 | 0.381559459 | -0.504067 | 0.002409 | hypomethylated |
| cg14174221 | 0.47172 | 0.332607568 | -0.50411  | 0.000174 | hypomethylated |
| cg06173216 | 0.83638 | 0.589723784 | -0.504119 | 1.28E-05 | hypomethylated |
| cg06176471 | 0.62606 | 0.441410811 | -0.504179 | 2.35E-05 | hypomethylated |
| cg24756403 | 0.89338 | 0.629874054 | -0.504211 | 4.24E-06 | hypomethylated |
| cg14055655 | 0.79509 | 0.560565946 | -0.504234 | 1.94E-05 | hypomethylated |
| cg02149376 | 0.74866 | 0.527808649 | -0.504296 | 1.31E-05 | hypomethylated |
| cg04804772 | 0.73378 | 0.517265405 | -0.504443 | 2.56E-06 | hypomethylated |
| cg11549874 | 0.77217 | 0.544307027 | -0.504498 | 7.72E-06 | hypomethylated |
| cg22800830 | 0.64268 | 0.453025946 | -0.504507 | 0.000219 | hypomethylated |
| cg14323984 | 0.8884  | 0.626227027 | -0.504524 | 1.33E-05 | hypomethylated |
| cg03171478 | 0.58267 | 0.410701081 | -0.50459  | 0.001    | hypomethylated |
| cg17023034 | 0.66712 | 0.470224324 | -0.504597 | 0.000506 | hypomethylated |
| cg19878076 | 0.70763 | 0.498726486 | -0.504746 | 1.28E-05 | hypomethylated |
| cg02452732 | 0.55587 | 0.391751892 | -0.504807 | 0.000365 | hypomethylated |
| cg19161424 | 0.44863 | 0.316123243 | -0.505039 | 8.73E-05 | hypomethylated |
| cg02427576 | 0.79889 | 0.562899459 | -0.50512  | 0.000103 | hypomethylated |
| cg08864375 | 0.72199 | 0.508714054 | -0.505124 | 0.000893 | hypomethylated |
| cg04080022 | 0.51191 | 0.360682162 | -0.505162 | 0.000122 | hypomethylated |
| cg07455815 | 0.56175 | 0.395793514 | -0.50518  | 7.29E-05 | hypomethylated |
| cg03458316 | 0.83176 | 0.586014054 | -0.505232 | 6.48E-06 | hypomethylated |
| cg26514492 | 0.47584 | 0.335240541 | -0.50528  | 0.000575 | hypomethylated |
| cg20300541 | 0.71083 | 0.500751892 | -0.505409 | 1.46E-05 | hypomethylated |
| cg25085755 | 0.50599 | 0.356444865 | -0.50543  | 1.30E-05 | hypomethylated |
| cg02931464 | 0.4344  | 0.306011351 | -0.505439 | 0.00048  | hypomethylated |
| cg13772742 | 0.51613 | 0.363584865 | -0.505442 | 3.23E-05 | hypomethylated |
| cg14702787 | 0.81669 | 0.575304865 | -0.505462 | 1.50E-05 | hypomethylated |
| cg04055345 | 0.65137 | 0.458841081 | -0.505483 | 0.000563 | hypomethylated |
| cg06345909 | 0.56179 | 0.395728649 | -0.505519 | 0.000764 | hypomethylated |
| cg00883689 | 0.80228 | 0.565077838 | -0.505656 | 6.31E-05 | hypomethylated |
| cg21078330 | 0.6798  | 0.478761622 | -0.505803 | 0.000159 | hypomethylated |
| cg17220545 | 0.7702  | 0.542409189 | -0.505852 | 6.31E-05 | hypomethylated |
| cg25424194 | 0.60038 | 0.422786486 | -0.505947 | 3.00E-05 | hypomethylated |
| cg10833393 | 0.46916 | 0.330374595 | -0.505977 | 8.52E-05 | hypomethylated |
| cg12232118 | 0.69736 | 0.491067568 | -0.505982 | 7.63E-07 | hypomethylated |
| cg14574951 | 0.77463 | 0.545366486 | -0.506281 | 2.71E-05 | hypomethylated |
| cg14228177 | 0.91835 | 0.646545946 | -0.506291 | 2.16E-06 | hypomethylated |
| cg06623778 | 0.4791  | 0.337291351 | -0.506331 | 0.002363 | hypomethylated |
| cg08535779 | 0.67141 | 0.472678919 | -0.506334 | 2.56E-06 | hypomethylated |
| cg20389678 | 0.4624  | 0.325492432 | -0.506517 | 6.15E-05 | hypomethylated |
| cg02637031 | 0.54407 | 0.382969189 | -0.506564 | 0.000382 | hypomethylated |
| cg19389370 | 0.76239 | 0.536618919 | -0.506631 | 0.000147 | hypomethylated |
| cg18271897 | 0.62445 | 0.439522162 | -0.50665  | 0.0003   | hypomethylated |
| cg09387382 | 0.39111 | 0.275267568 | -0.50674  | 0.000313 | hypomethylated |
| cg05103064 | 0.74606 | 0.525081081 | -0.506751 | 3.04E-05 | hypomethylated |
| cg03344767 | 0.61649 | 0.433878919 | -0.506785 | 0.000626 | hypomethylated |
| cg03292675 | 0.64506 | 0.453979459 | -0.506806 | 0.002751 | hypomethylated |
| cg07665060 | 0.41813 | 0.294215135 | -0.50708  | 0.000174 | hypomethylated |
| cg23218363 | 0.8311  | 0.584776216 | -0.507137 | 2.78E-05 | hypomethylated |
| cg06735243 | 0.68495 | 0.481942162 | -0.507139 | 3.59E-06 | hypomethylated |
| cg00387357 | 0.82866 | 0.582998378 | -0.507288 | 2.49E-06 | hypomethylated |
| cg26330809 | 0.71019 | 0.49959027  | -0.50746  | 1.80E-05 | hypomethylated |



|            |         |             |           |          |                |
|------------|---------|-------------|-----------|----------|----------------|
| cg11808677 | 0.69166 | 0.486539459 | -0.507506 | 4.10E-05 | hypomethylated |
| cg02004632 | 0.45776 | 0.321978919 | -0.507625 | 0.000119 | hypomethylated |
| cg23547157 | 0.54836 | 0.385681622 | -0.507713 | 7.84E-05 | hypomethylated |
| cg20992002 | 0.70415 | 0.495253514 | -0.507716 | 0.000195 | hypomethylated |
| cg21808406 | 0.45631 | 0.320931351 | -0.50775  | 0.00054  | hypomethylated |
| cg04165508 | 0.85069 | 0.59820973  | -0.507982 | 2.04E-05 | hypomethylated |
| cg22380178 | 0.55198 | 0.388135135 | -0.508057 | 1.80E-05 | hypomethylated |
| cg02023138 | 0.88501 | 0.622285405 | -0.508117 | 8.83E-06 | hypomethylated |
| cg00708486 | 0.78254 | 0.550187027 | -0.508242 | 6.30E-06 | hypomethylated |
| cg24156261 | 0.6503  | 0.457187568 | -0.508319 | 0.000251 | hypomethylated |
| cg08817867 | 0.62216 | 0.437398378 | -0.508338 | 0.000178 | hypomethylated |
| cg12888521 | 0.90171 | 0.633918378 | -0.508366 | 1.72E-06 | hypomethylated |
| cg09362047 | 0.84471 | 0.593833514 | -0.508398 | 2.39E-05 | hypomethylated |
| cg03875678 | 0.42853 | 0.30124973  | -0.508436 | 0.000335 | hypomethylated |
| cg20550154 | 0.63478 | 0.446238378 | -0.508442 | 0.00099  | hypomethylated |
| cg23217940 | 0.83913 | 0.589817838 | -0.508625 | 3.90E-06 | hypomethylated |
| cg02697427 | 0.78239 | 0.549921622 | -0.508662 | 7.74E-05 | hypomethylated |
| cg22779330 | 0.73682 | 0.517890811 | -0.508664 | 4.12E-06 | hypomethylated |
| cg24710503 | 0.78677 | 0.552983784 | -0.508705 | 2.04E-05 | hypomethylated |
| cg04772575 | 0.65484 | 0.460254595 | -0.50871  | 0.000147 | hypomethylated |
| cg09043214 | 0.80392 | 0.565026486 | -0.508733 | 0.000789 | hypomethylated |
| cg07826255 | 0.43183 | 0.303497838 | -0.508777 | 0.000129 | hypomethylated |
| cg05246522 | 0.6928  | 0.486805405 | -0.509094 | 7.29E-05 | hypomethylated |
| cg16378015 | 0.58015 | 0.407638919 | -0.509134 | 3.32E-05 | hypomethylated |
| cg13423554 | 0.66744 | 0.468966486 | -0.509153 | 0.000667 | hypomethylated |
| cg07102937 | 0.70476 | 0.495147027 | -0.509275 | 1.43E-06 | hypomethylated |
| cg13885205 | 0.66811 | 0.469350811 | -0.509419 | 1.71E-05 | hypomethylated |
| cg11819702 | 0.86629 | 0.608545405 | -0.509485 | 1.04E-05 | hypomethylated |
| cg06609496 | 0.76709 | 0.538848649 | -0.509516 | 1.75E-05 | hypomethylated |
| cg03074188 | 0.70356 | 0.494143784 | -0.509743 | 0.002649 | hypomethylated |
| cg22512768 | 0.8369  | 0.587780541 | -0.509778 | 1.54E-06 | hypomethylated |
| cg18026955 | 0.3933  | 0.276221622 | -0.509804 | 0.000365 | hypomethylated |
| cg09283548 | 0.64646 | 0.454011351 | -0.509833 | 0.000884 | hypomethylated |
| cg15152595 | 0.7635  | 0.536197297 | -0.509864 | 3.69E-06 | hypomethylated |
| cg18951352 | 0.61641 | 0.432895676 | -0.509871 | 0.001603 | hypomethylated |
| cg11821439 | 0.59309 | 0.416482703 | -0.509994 | 6.62E-05 | hypomethylated |
| cg27514336 | 0.87302 | 0.612989189 | -0.510153 | 1.39E-05 | hypomethylated |
| cg05898618 | 0.91181 | 0.640210811 | -0.510186 | 2.42E-05 | hypomethylated |
| cg23404711 | 0.69473 | 0.487777297 | -0.51023  | 0.000104 | hypomethylated |
| cg06582411 | 0.66417 | 0.46631027  | -0.510262 | 1.39E-05 | hypomethylated |
| cg07777652 | 0.70722 | 0.496531892 | -0.510273 | 0.001096 | hypomethylated |
| cg00334976 | 0.69664 | 0.489087568 | -0.510321 | 2.79E-06 | hypomethylated |
| cg21332304 | 0.82181 | 0.576963243 | -0.510325 | 3.32E-05 | hypomethylated |
| cg02999385 | 0.70354 | 0.493927568 | -0.510333 | 2.15E-05 | hypomethylated |
| cg13997068 | 0.57362 | 0.40271027  | -0.510353 | 5.73E-06 | hypomethylated |
| cg00290023 | 0.45303 | 0.318032432 | -0.510433 | 0.000667 | hypomethylated |
| cg17549878 | 0.60876 | 0.427353514 | -0.510444 | 0.00014  | hypomethylated |
| cg15745401 | 0.79701 | 0.559478919 | -0.510514 | 2.64E-05 | hypomethylated |
| cg17142931 | 0.63401 | 0.445050811 | -0.510536 | 1.12E-05 | hypomethylated |
| cg17193961 | 0.78705 | 0.552474595 | -0.510547 | 0.000109 | hypomethylated |
| cg01303236 | 0.66376 | 0.46593027  | -0.510548 | 7.84E-05 | hypomethylated |
| cg10097651 | 0.65701 | 0.461191892 | -0.510548 | 0.000346 | hypomethylated |
| cg00591333 | 0.6495  | 0.455889189 | -0.510646 | 4.05E-05 | hypomethylated |
| cg17168630 | 0.81862 | 0.574521622 | -0.510833 | 4.64E-05 | hypomethylated |
| cg21058973 | 0.94467 | 0.662945405 | -0.51092  | 4.73E-06 | hypomethylated |
| cg23461926 | 0.68578 | 0.481252432 | -0.510952 | 4.48E-06 | hypomethylated |
| cg08170519 | 0.59401 | 0.416820541 | -0.511061 | 7.83E-06 | hypomethylated |
| cg21488289 | 0.60305 | 0.423160541 | -0.511073 | 2.45E-05 | hypomethylated |

|            |         |             |           |          |                |
|------------|---------|-------------|-----------|----------|----------------|
| cg16286735 | 0.69471 | 0.487475135 | -0.511082 | 0.000148 | hypomethylated |
| cg10606923 | 0.49737 | 0.348954595 | -0.51128  | 2.04E-05 | hypomethylated |
| cg10622174 | 0.5532  | 0.388112432 | -0.511327 | 0.0003   | hypomethylated |
| cg10130564 | 0.68848 | 0.483021081 | -0.511329 | 0.00054  | hypomethylated |
| cg21210630 | 0.7521  | 0.527541081 | -0.511641 | 2.46E-06 | hypomethylated |
| cg09287328 | 0.69632 | 0.488412432 | -0.511651 | 0.000365 | hypomethylated |
| cg08966188 | 0.81093 | 0.568765946 | -0.511742 | 9.31E-06 | hypomethylated |
| cg15581944 | 0.62707 | 0.439791351 | -0.511807 | 0.000563 | hypomethylated |
| cg06798115 | 0.51475 | 0.361003243 | -0.51186  | 4.58E-05 | hypomethylated |
| cg07278181 | 0.79899 | 0.560336216 | -0.511885 | 2.16E-06 | hypomethylated |
| cg23316449 | 0.50621 | 0.354995135 | -0.511937 | 0.004326 | hypomethylated |
| cg14818960 | 0.64898 | 0.455096216 | -0.512002 | 0.00017  | hypomethylated |
| cg05818394 | 0.54267 | 0.380542703 | -0.512017 | 0.000403 | hypomethylated |
| cg02907402 | 0.66039 | 0.463085405 | -0.51204  | 0.000358 | hypomethylated |
| cg09613192 | 0.63663 | 0.446415676 | -0.512067 | 0.000756 | hypomethylated |
| cg08675364 | 0.72534 | 0.508605946 | -0.512109 | 8.60E-06 | hypomethylated |
| cg04335293 | 0.39601 | 0.277677838 | -0.512125 | 0.000126 | hypomethylated |
| cg15824323 | 0.79854 | 0.559925405 | -0.51213  | 5.58E-06 | hypomethylated |
| cg11249486 | 0.62098 | 0.435395135 | -0.512222 | 3.76E-05 | hypomethylated |
| cg10028983 | 0.76104 | 0.533510811 | -0.512455 | 9.38E-05 | hypomethylated |
| cg13817802 | 0.71878 | 0.503874595 | -0.512486 | 5.32E-05 | hypomethylated |
| cg00377915 | 0.5959  | 0.417715135 | -0.512551 | 5.86E-05 | hypomethylated |
| cg12894711 | 0.57163 | 0.400697297 | -0.512569 | 0.000204 | hypomethylated |
| cg01629749 | 0.88527 | 0.620548108 | -0.512574 | 3.04E-06 | hypomethylated |
| cg22055891 | 0.89641 | 0.628322162 | -0.512654 | 1.88E-06 | hypomethylated |
| cg24069962 | 0.82741 | 0.57994     | -0.512699 | 3.04E-06 | hypomethylated |
| cg04722643 | 0.83348 | 0.584178378 | -0.512739 | 1.54E-06 | hypomethylated |
| cg19817165 | 0.59437 | 0.416568108 | -0.512809 | 4.10E-05 | hypomethylated |
| cg10299383 | 0.63028 | 0.441731892 | -0.512822 | 6.01E-05 | hypomethylated |
| cg25152942 | 0.89742 | 0.628919459 | -0.512908 | 5.65E-06 | hypomethylated |
| cg18879828 | 0.53881 | 0.377583784 | -0.51298  | 1.14E-05 | hypomethylated |
| cg08565003 | 0.86933 | 0.609185405 | -0.513023 | 1.94E-05 | hypomethylated |
| cg23290313 | 0.80421 | 0.563545405 | -0.51304  | 7.12E-05 | hypomethylated |
| cg23061795 | 0.73798 | 0.517106486 | -0.51312  | 4.05E-05 | hypomethylated |
| cg10857905 | 0.50444 | 0.353457297 | -0.513147 | 6.15E-05 | hypomethylated |
| cg21012061 | 0.63724 | 0.446495676 | -0.513191 | 0.000378 | hypomethylated |
| cg15695155 | 0.573   | 0.401474054 | -0.513228 | 0.000224 | hypomethylated |
| cg14131220 | 0.49405 | 0.346061081 | -0.51363  | 0.005508 | hypomethylated |
| cg21126943 | 0.37966 | 0.265929189 | -0.513666 | 0.000528 | hypomethylated |
| cg02392228 | 0.47329 | 0.331483243 | -0.513788 | 0.000338 | hypomethylated |
| cg02074956 | 0.69756 | 0.488528649 | -0.513874 | 0.000135 | hypomethylated |
| cg23536138 | 0.6591  | 0.461581081 | -0.513913 | 5.32E-05 | hypomethylated |
| cg20699549 | 0.53545 | 0.374984324 | -0.513922 | 0.000839 | hypomethylated |
| cg02499214 | 0.68402 | 0.479019459 | -0.513954 | 0.001301 | hypomethylated |
| cg20737812 | 0.66584 | 0.466271351 | -0.514006 | 5.65E-06 | hypomethylated |
| cg02304370 | 0.69228 | 0.484768108 | -0.514061 | 0.000178 | hypomethylated |
| cg01065161 | 0.95113 | 0.666004324 | -0.514111 | 2.64E-06 | hypomethylated |
| cg05678658 | 0.7181  | 0.50283027  | -0.514113 | 7.41E-07 | hypomethylated |
| cg10900049 | 0.91695 | 0.642040541 | -0.514179 | 0.000327 | hypomethylated |
| cg18958693 | 0.89999 | 0.630128649 | -0.514263 | 1.01E-05 | hypomethylated |
| cg16794579 | 0.63786 | 0.446588108 | -0.514295 | 1.62E-05 | hypomethylated |
| cg22758846 | 0.64149 | 0.449100541 | -0.514388 | 0.000104 | hypomethylated |
| cg23577033 | 0.82117 | 0.574880541 | -0.514419 | 5.28E-06 | hypomethylated |
| cg25198007 | 0.34196 | 0.239392973 | -0.514447 | 0.003136 | hypomethylated |
| cg16258854 | 0.69501 | 0.486541622 | -0.514471 | 4.26E-05 | hypomethylated |
| cg06710328 | 0.61102 | 0.427743784 | -0.514473 | 0.000575 | hypomethylated |
| cg16167060 | 0.68431 | 0.47905027  | -0.514473 | 0.000313 | hypomethylated |
| cg14244402 | 0.78034 | 0.546263784 | -0.514505 | 2.15E-05 | hypomethylated |

|            |         |             |           |          |                |
|------------|---------|-------------|-----------|----------|----------------|
| cg05548488 | 0.41036 | 0.287244324 | -0.514612 | 0.002318 | hypomethylated |
| cg03547062 | 0.84972 | 0.594785946 | -0.514617 | 1.39E-05 | hypomethylated |
| cg17069533 | 0.85364 | 0.597526486 | -0.514625 | 2.95E-06 | hypomethylated |
| cg03509949 | 0.6335  | 0.443425946 | -0.514651 | 0.000511 | hypomethylated |
| cg24289314 | 0.77021 | 0.539096757 | -0.514708 | 2.57E-05 | hypomethylated |
| cg10529845 | 0.592   | 0.414346486 | -0.514759 | 1.38E-05 | hypomethylated |
| cg22502856 | 0.80563 | 0.5638      | -0.514934 | 4.15E-05 | hypomethylated |
| cg03339817 | 0.81624 | 0.571178378 | -0.515052 | 6.31E-05 | hypomethylated |
| cg15994604 | 0.49431 | 0.34588     | -0.515144 | 0.000399 | hypomethylated |
| cg27121309 | 0.83236 | 0.582391351 | -0.515219 | 6.31E-05 | hypomethylated |
| cg13728308 | 0.71494 | 0.500184865 | -0.515361 | 1.06E-05 | hypomethylated |
| cg06230674 | 0.46559 | 0.325712432 | -0.515461 | 0.000805 | hypomethylated |
| cg15470102 | 0.69187 | 0.483990811 | -0.515521 | 0.00039  | hypomethylated |
| cg05350293 | 0.76149 | 0.532614595 | -0.515733 | 1.30E-05 | hypomethylated |
| cg00302979 | 0.85453 | 0.597664865 | -0.515794 | 3.79E-06 | hypomethylated |
| cg23282441 | 0.60381 | 0.422291892 | -0.515854 | 0.000251 | hypomethylated |
| cg11953749 | 0.42365 | 0.296269189 | -0.515964 | 0.004134 | hypomethylated |
| cg21764708 | 0.79507 | 0.556002162 | -0.515991 | 4.82E-05 | hypomethylated |
| cg16530128 | 0.809   | 0.565714054 | -0.516067 | 5.28E-06 | hypomethylated |
| cg23823000 | 0.57907 | 0.404924865 | -0.516084 | 0.000741 | hypomethylated |
| cg04751761 | 0.60147 | 0.420531351 | -0.516279 | 0.001031 | hypomethylated |
| cg26118131 | 0.68941 | 0.481967027 | -0.516428 | 8.03E-05 | hypomethylated |
| cg23093090 | 0.7655  | 0.535135135 | -0.516499 | 2.54E-05 | hypomethylated |
| cg18997901 | 0.79998 | 0.559229189 | -0.516524 | 3.85E-06 | hypomethylated |
| cg05626664 | 0.71012 | 0.496394595 | -0.516575 | 0.000506 | hypomethylated |
| cg13235717 | 0.71743 | 0.501466486 | -0.516685 | 7.93E-06 | hypomethylated |
| cg11326510 | 0.93372 | 0.652643243 | -0.516695 | 1.12E-06 | hypomethylated |
| cg25178683 | 0.45426 | 0.317505946 | -0.516735 | 9.16E-05 | hypomethylated |
| cg23750514 | 0.70655 | 0.493812432 | -0.516828 | 4.58E-05 | hypomethylated |
| cg07441152 | 0.72305 | 0.505341081 | -0.516838 | 5.58E-05 | hypomethylated |
| cg15594444 | 0.86688 | 0.605857297 | -0.516854 | 1.71E-05 | hypomethylated |
| cg12182124 | 0.62746 | 0.438491892 | -0.516973 | 0.000426 | hypomethylated |
| cg25951288 | 0.56401 | 0.394137838 | -0.51702  | 0.000445 | hypomethylated |
| cg00440980 | 0.79472 | 0.555342703 | -0.517068 | 1.12E-05 | hypomethylated |
| cg05865746 | 0.50978 | 0.356226486 | -0.51708  | 0.004776 | hypomethylated |
| cg12027068 | 0.51173 | 0.35754     | -0.517278 | 4.82E-05 | hypomethylated |
| cg24302752 | 0.63397 | 0.442947568 | -0.517279 | 0.000789 | hypomethylated |
| cg08930413 | 0.7472  | 0.522027027 | -0.51737  | 1.46E-05 | hypomethylated |
| cg24159636 | 0.54708 | 0.382213514 | -0.517373 | 5.43E-06 | hypomethylated |
| cg07041428 | 0.7301  | 0.510051351 | -0.517452 | 0.000129 | hypomethylated |
| cg26844633 | 0.79372 | 0.554467027 | -0.517528 | 2.32E-05 | hypomethylated |
| cg09852221 | 0.43535 | 0.30412     | -0.517535 | 0.001423 | hypomethylated |
| cg00249584 | 0.66389 | 0.463760541 | -0.517564 | 5.12E-05 | hypomethylated |
| cg05982460 | 0.93563 | 0.653558919 | -0.517621 | 4.58E-05 | hypomethylated |
| cg07127410 | 0.65032 | 0.45424973  | -0.517664 | 0.000148 | hypomethylated |
| cg26392737 | 0.67974 | 0.474798378 | -0.517668 | 0.000104 | hypomethylated |
| cg19324997 | 0.77221 | 0.539384865 | -0.517678 | 2.64E-05 | hypomethylated |
| cg02847588 | 0.67157 | 0.469035135 | -0.517842 | 0.000126 | hypomethylated |
| cg02038492 | 0.81512 | 0.569263784 | -0.517915 | 2.16E-06 | hypomethylated |
| cg05701418 | 0.51869 | 0.362229189 | -0.51797  | 0.0002   | hypomethylated |
| cg09476006 | 0.87225 | 0.60912973  | -0.517992 | 3.39E-06 | hypomethylated |
| cg11267802 | 0.66134 | 0.461842162 | -0.517992 | 2.38E-05 | hypomethylated |
| cg21769093 | 0.77505 | 0.541221622 | -0.51807  | 0.000132 | hypomethylated |
| cg10796749 | 0.66896 | 0.467120541 | -0.518125 | 0.001571 | hypomethylated |
| cg10336193 | 0.51709 | 0.361065946 | -0.518153 | 0.00064  | hypomethylated |
| cg09338148 | 0.40504 | 0.282818919 | -0.518186 | 9.72E-05 | hypomethylated |
| cg21275690 | 0.42129 | 0.294143243 | -0.518295 | 9.72E-05 | hypomethylated |
| cg15913671 | 0.65072 | 0.454314595 | -0.518345 | 3.17E-06 | hypomethylated |

|            |         |             |           |          |                |
|------------|---------|-------------|-----------|----------|----------------|
| cg06367321 | 0.87603 | 0.611616216 | -0.518354 | 1.15E-05 | hypomethylated |
| cg10991475 | 0.58251 | 0.406663243 | -0.518448 | 0.000187 | hypomethylated |
| cg07858848 | 0.7917  | 0.552605405 | -0.518704 | 5.72E-05 | hypomethylated |
| cg07118000 | 0.42174 | 0.294368649 | -0.51873  | 0.005085 | hypomethylated |
| cg22603450 | 0.4812  | 0.33586973  | -0.518735 | 8.42E-05 | hypomethylated |
| cg00736299 | 0.73658 | 0.514114595 | -0.518752 | 0.000112 | hypomethylated |
| cg04332442 | 0.57572 | 0.401824324 | -0.518802 | 0.001667 | hypomethylated |
| cg11202887 | 0.76989 | 0.53734     | -0.518817 | 1.28E-05 | hypomethylated |
| cg18706476 | 0.95686 | 0.667828108 | -0.518831 | 2.10E-06 | hypomethylated |
| cg03006527 | 0.46985 | 0.327900541 | -0.518942 | 7.12E-05 | hypomethylated |
| cg12616177 | 0.69362 | 0.48404     | -0.519019 | 1.75E-05 | hypomethylated |
| cg17316718 | 0.69221 | 0.483055676 | -0.51902  | 0.000185 | hypomethylated |
| cg07591515 | 0.79718 | 0.556302162 | -0.519037 | 9.57E-06 | hypomethylated |
| cg06601581 | 0.64575 | 0.45059027  | -0.51916  | 0.00017  | hypomethylated |
| cg12886406 | 0.75696 | 0.528163784 | -0.519232 | 1.52E-05 | hypomethylated |
| cg12123019 | 0.57723 | 0.402734595 | -0.519317 | 0.001949 | hypomethylated |
| cg03928887 | 0.7506  | 0.523681081 | -0.519356 | 3.04E-05 | hypomethylated |
| cg10547761 | 0.66587 | 0.464541622 | -0.519433 | 3.15E-05 | hypomethylated |
| cg21097788 | 0.65758 | 0.458751892 | -0.519452 | 0.000182 | hypomethylated |
| cg18241555 | 0.48994 | 0.341796216 | -0.519469 | 0.000696 | hypomethylated |
| cg06602545 | 0.5807  | 0.405103784 | -0.519501 | 3.36E-05 | hypomethylated |
| cg07807470 | 0.59834 | 0.417393514 | -0.519557 | 0.000588 | hypomethylated |
| cg07992484 | 0.47511 | 0.331427568 | -0.519568 | 4.53E-05 | hypomethylated |
| cg18127823 | 0.83995 | 0.585929189 | -0.519577 | 1.54E-05 | hypomethylated |
| cg19756068 | 0.77226 | 0.538695135 | -0.519618 | 3.39E-06 | hypomethylated |
| cg06837799 | 0.56931 | 0.397114054 | -0.519661 | 0.000528 | hypomethylated |
| cg10322876 | 0.80878 | 0.564133514 | -0.519711 | 1.72E-06 | hypomethylated |
| cg20539142 | 0.66971 | 0.467079459 | -0.519869 | 0.00017  | hypomethylated |
| cg02666257 | 0.44798 | 0.312436757 | -0.51987  | 0.001107 | hypomethylated |
| cg27391982 | 0.66024 | 0.460439459 | -0.519979 | 0.000293 | hypomethylated |
| cg20333292 | 0.61804 | 0.43100973  | -0.51998  | 0.000435 | hypomethylated |
| cg27658026 | 0.59804 | 0.417053514 | -0.520009 | 7.56E-05 | hypomethylated |
| cg14832378 | 0.69381 | 0.483832973 | -0.520032 | 2.07E-06 | hypomethylated |
| cg12640305 | 0.52771 | 0.367955135 | -0.520215 | 4.05E-05 | hypomethylated |
| cg05001389 | 0.47964 | 0.334411351 | -0.520328 | 0.001786 | hypomethylated |
| cg27409991 | 0.75753 | 0.528151351 | -0.520352 | 3.69E-06 | hypomethylated |
| cg02999711 | 0.87313 | 0.608742162 | -0.520365 | 1.58E-05 | hypomethylated |
| cg17184165 | 0.65882 | 0.459311892 | -0.52041  | 2.42E-06 | hypomethylated |
| cg14819242 | 0.88237 | 0.615156216 | -0.520431 | 3.04E-06 | hypomethylated |
| cg19997384 | 0.34816 | 0.242714054 | -0.520493 | 8.73E-05 | hypomethylated |
| cg14147151 | 0.47916 | 0.333975135 | -0.520767 | 0.002026 | hypomethylated |
| cg14453145 | 0.60328 | 0.420482703 | -0.520781 | 0.000358 | hypomethylated |
| cg20074340 | 0.70998 | 0.494848649 | -0.520791 | 4.48E-06 | hypomethylated |
| cg27239243 | 0.6299  | 0.438994054 | -0.520921 | 0.000219 | hypomethylated |
| cg08565197 | 0.56054 | 0.390654054 | -0.520926 | 6.31E-05 | hypomethylated |
| cg19607021 | 0.568   | 0.395849189 | -0.52094  | 1.80E-05 | hypomethylated |
| cg14285788 | 0.62522 | 0.435721081 | -0.520959 | 0.000581 | hypomethylated |
| cg18928221 | 0.63329 | 0.441344324 | -0.520962 | 3.40E-05 | hypomethylated |
| cg04717699 | 0.61244 | 0.426780541 | -0.521074 | 0.000454 | hypomethylated |
| cg10290728 | 0.63415 | 0.441905946 | -0.521085 | 1.75E-05 | hypomethylated |
| cg16426215 | 0.57223 | 0.398754595 | -0.521094 | 1.15E-05 | hypomethylated |
| cg27292099 | 0.68914 | 0.480222162 | -0.521095 | 3.74E-06 | hypomethylated |
| cg12821702 | 0.6702  | 0.466948649 | -0.521328 | 5.19E-05 | hypomethylated |
| cg09903452 | 0.48348 | 0.336789189 | -0.52161  | 3.81E-05 | hypomethylated |
| cg02685680 | 0.81033 | 0.564402703 | -0.521785 | 8.22E-07 | hypomethylated |
| cg20528787 | 0.56168 | 0.391191892 | -0.521872 | 0.000234 | hypomethylated |
| cg15599832 | 0.81454 | 0.567278378 | -0.521929 | 6.57E-06 | hypomethylated |
| cg17888259 | 0.70106 | 0.488245405 | -0.521931 | 2.32E-05 | hypomethylated |

|            |         |             |           |          |                |
|------------|---------|-------------|-----------|----------|----------------|
| cg18787420 | 0.53884 | 0.375244324 | -0.522027 | 7.56E-05 | hypomethylated |
| cg06911744 | 0.94735 | 0.659717838 | -0.522048 | 2.71E-06 | hypomethylated |
| cg12395299 | 0.56908 | 0.396275676 | -0.522127 | 1.04E-05 | hypomethylated |
| cg23291048 | 0.66554 | 0.463441622 | -0.522138 | 0.000262 | hypomethylated |
| cg19396666 | 0.56552 | 0.393772432 | -0.522216 | 1.25E-05 | hypomethylated |
| cg23620049 | 0.66508 | 0.463083243 | -0.522256 | 5.72E-05 | hypomethylated |
| cg04205616 | 0.88179 | 0.613897838 | -0.522437 | 1.28E-05 | hypomethylated |
| cg10274029 | 0.68259 | 0.47518973  | -0.522516 | 0.000588 | hypomethylated |
| cg13725826 | 0.77371 | 0.538616216 | -0.522535 | 6.78E-05 | hypomethylated |
| cg11021222 | 0.65902 | 0.458771892 | -0.522545 | 5.32E-05 | hypomethylated |
| cg05754905 | 0.92483 | 0.643805405 | -0.522564 | 8.34E-07 | hypomethylated |
| cg21002223 | 0.72304 | 0.503325405 | -0.522584 | 1.18E-05 | hypomethylated |
| cg06818159 | 0.63729 | 0.443583784 | -0.522743 | 9.49E-05 | hypomethylated |
| cg13512948 | 0.67868 | 0.47236     | -0.522845 | 1.58E-05 | hypomethylated |
| cg24052475 | 0.59585 | 0.414708649 | -0.522851 | 1.66E-05 | hypomethylated |
| cg26292918 | 0.71607 | 0.498335676 | -0.522983 | 7.52E-06 | hypomethylated |
| cg01310482 | 0.81104 | 0.564398378 | -0.523059 | 9.82E-06 | hypomethylated |
| cg16854533 | 0.75651 | 0.526444865 | -0.523077 | 1.58E-05 | hypomethylated |
| cg26078976 | 0.72355 | 0.503496216 | -0.523112 | 1.44E-05 | hypomethylated |
| cg20051772 | 0.39473 | 0.274671892 | -0.523157 | 0.000331 | hypomethylated |
| cg11839020 | 0.65708 | 0.457225405 | -0.523163 | 0.000382 | hypomethylated |
| cg08579420 | 0.76279 | 0.530771892 | -0.523194 | 0.000119 | hypomethylated |
| cg17669033 | 0.68648 | 0.477614595 | -0.523371 | 1.04E-05 | hypomethylated |
| cg24063912 | 0.61625 | 0.428750811 | -0.523376 | 2.21E-05 | hypomethylated |
| cg22219089 | 0.59228 | 0.412071351 | -0.523385 | 0.000563 | hypomethylated |
| cg14361132 | 0.64852 | 0.451197297 | -0.523393 | 6.78E-05 | hypomethylated |
| cg03611265 | 0.73502 | 0.511333514 | -0.523519 | 0.000229 | hypomethylated |
| cg02744705 | 0.76754 | 0.533947568 | -0.523544 | 1.87E-05 | hypomethylated |
| cg23519637 | 0.7024  | 0.488618378 | -0.523585 | 0.001452 | hypomethylated |
| cg20623503 | 0.85277 | 0.593195135 | -0.52365  | 2.95E-06 | hypomethylated |
| cg17474524 | 0.48924 | 0.340299459 | -0.523738 | 0.001395 | hypomethylated |
| cg05985821 | 0.59212 | 0.411855676 | -0.523751 | 0.00395  | hypomethylated |
| cg12720921 | 0.626   | 0.435419459 | -0.523757 | 0.001511 | hypomethylated |
| cg14921326 | 0.61582 | 0.428315135 | -0.523836 | 6.23E-05 | hypomethylated |
| cg19766988 | 0.83701 | 0.582067027 | -0.52406  | 8.60E-06 | hypomethylated |
| cg08639339 | 0.55509 | 0.386004324 | -0.524105 | 0.000135 | hypomethylated |
| cg00618155 | 0.89473 | 0.622183243 | -0.524113 | 1.80E-06 | hypomethylated |
| cg19035908 | 0.71615 | 0.497988108 | -0.524151 | 2.27E-05 | hypomethylated |
| cg23299254 | 0.88712 | 0.616864865 | -0.524175 | 1.09E-05 | hypomethylated |
| cg23401796 | 0.89616 | 0.623120541 | -0.524245 | 6.31E-05 | hypomethylated |
| cg15487251 | 0.63145 | 0.439053514 | -0.524272 | 0.000399 | hypomethylated |
| cg21447717 | 0.61187 | 0.425401081 | -0.524401 | 1.46E-05 | hypomethylated |
| cg14080050 | 0.63297 | 0.440051892 | -0.524463 | 0.001452 | hypomethylated |
| cg01200021 | 0.73301 | 0.509582703 | -0.524517 | 4.26E-05 | hypomethylated |
| cg05357209 | 0.76296 | 0.530379459 | -0.524583 | 1.09E-05 | hypomethylated |
| cg17297634 | 0.64834 | 0.450662162 | -0.524704 | 0.001368 | hypomethylated |
| cg26247168 | 0.90631 | 0.629971892 | -0.524717 | 1.04E-05 | hypomethylated |
| cg25318189 | 0.47031 | 0.326891892 | -0.524798 | 7.12E-05 | hypomethylated |
| cg10124440 | 0.53183 | 0.369641081 | -0.52484  | 1.62E-05 | hypomethylated |
| cg27235315 | 0.89793 | 0.624062162 | -0.524913 | 3.17E-06 | hypomethylated |
| cg01767053 | 0.9237  | 0.641918378 | -0.525035 | 2.29E-06 | hypomethylated |
| cg03495053 | 0.74497 | 0.517662162 | -0.525171 | 1.62E-05 | hypomethylated |
| cg12907876 | 0.63503 | 0.441224324 | -0.525312 | 7.72E-06 | hypomethylated |
| cg23721083 | 0.43973 | 0.305503784 | -0.525428 | 0.003705 | hypomethylated |
| cg01359822 | 0.75676 | 0.525748108 | -0.525464 | 8.63E-05 | hypomethylated |
| cg12050175 | 0.49492 | 0.343835135 | -0.525478 | 5.45E-05 | hypomethylated |
| cg09346775 | 0.47598 | 0.330667027 | -0.525522 | 1.28E-05 | hypomethylated |
| cg27466235 | 0.73163 | 0.508263784 | -0.525537 | 6.95E-05 | hypomethylated |

|            |         |             |           |          |                |
|------------|---------|-------------|-----------|----------|----------------|
| cg04892766 | 0.62642 | 0.43517027  | -0.52555  | 6.05E-06 | hypomethylated |
| cg15160746 | 0.90882 | 0.631345946 | -0.525564 | 3.15E-05 | hypomethylated |
| cg02153681 | 0.82042 | 0.569928649 | -0.525581 | 0.000193 | hypomethylated |
| cg21197219 | 0.39636 | 0.275336216 | -0.525617 | 0.002274 | hypomethylated |
| cg16236228 | 0.65463 | 0.454741622 | -0.525633 | 1.94E-05 | hypomethylated |
| cg16822095 | 0.74257 | 0.515728108 | -0.525916 | 4.86E-06 | hypomethylated |
| cg05371506 | 0.65937 | 0.457922703 | -0.525984 | 0.000756 | hypomethylated |
| cg09621603 | 0.88719 | 0.616126486 | -0.526017 | 1.58E-06 | hypomethylated |
| cg04697265 | 0.4582  | 0.318200541 | -0.526041 | 0.000327 | hypomethylated |
| cg18919720 | 0.59301 | 0.411816216 | -0.526056 | 6.31E-05 | hypomethylated |
| cg13314965 | 0.74625 | 0.518229189 | -0.526069 | 4.26E-05 | hypomethylated |
| cg27019645 | 0.87319 | 0.606375676 | -0.526084 | 7.32E-06 | hypomethylated |
| cg02641941 | 0.80543 | 0.559316216 | -0.526095 | 5.65E-06 | hypomethylated |
| cg21791017 | 0.42461 | 0.294858378 | -0.526116 | 0.000148 | hypomethylated |
| cg21095280 | 0.66846 | 0.464172973 | -0.526179 | 0.000107 | hypomethylated |
| cg22143064 | 0.57156 | 0.396883784 | -0.526188 | 8.83E-06 | hypomethylated |
| cg02675173 | 0.79689 | 0.553258378 | -0.526427 | 2.48E-05 | hypomethylated |
| cg11084474 | 0.601   | 0.41724973  | -0.526454 | 1.08E-05 | hypomethylated |
| cg19738281 | 0.60304 | 0.418664865 | -0.526458 | 0.000474 | hypomethylated |
| cg25036779 | 0.38881 | 0.269931892 | -0.52647  | 0.003107 | hypomethylated |
| cg27215916 | 0.79399 | 0.551219459 | -0.526494 | 7.32E-06 | hypomethylated |
| cg11978890 | 0.60931 | 0.422982703 | -0.526578 | 1.25E-05 | hypomethylated |
| cg16681421 | 0.69936 | 0.485476757 | -0.526633 | 8.37E-06 | hypomethylated |
| cg07005353 | 0.86611 | 0.601159459 | -0.526803 | 1.22E-06 | hypomethylated |
| cg06042148 | 0.66921 | 0.464467568 | -0.526881 | 0.000653 | hypomethylated |
| cg09784932 | 0.84169 | 0.584169189 | -0.526903 | 2.49E-06 | hypomethylated |
| cg00406211 | 0.7165  | 0.49726973  | -0.526938 | 5.72E-05 | hypomethylated |
| cg25087341 | 0.71631 | 0.497116216 | -0.527001 | 8.22E-05 | hypomethylated |
| cg03548857 | 0.57495 | 0.39900973  | -0.527013 | 0.000313 | hypomethylated |
| cg07779313 | 0.57716 | 0.400523243 | -0.527085 | 0.000123 | hypomethylated |
| cg13499318 | 0.60475 | 0.419649189 | -0.527155 | 0.000102 | hypomethylated |
| cg03340408 | 0.53732 | 0.372848108 | -0.527194 | 5.86E-05 | hypomethylated |
| cg03752977 | 0.65467 | 0.45426     | -0.52725  | 2.02E-05 | hypomethylated |
| cg01239651 | 0.49996 | 0.346882162 | -0.527367 | 0.000741 | hypomethylated |
| cg12413156 | 0.69207 | 0.480149189 | -0.527435 | 0.000212 | hypomethylated |
| cg14294321 | 0.62459 | 0.433306486 | -0.527522 | 1.31E-05 | hypomethylated |
| cg01932361 | 0.78544 | 0.54486973  | -0.52759  | 5.32E-05 | hypomethylated |
| cg13820205 | 0.66903 | 0.46410973  | -0.527605 | 1.87E-05 | hypomethylated |
| cg20315150 | 0.61122 | 0.424002162 | -0.52762  | 0.000115 | hypomethylated |
| cg11150074 | 0.76571 | 0.531155676 | -0.527663 | 3.71E-05 | hypomethylated |
| cg22050157 | 0.54476 | 0.37786973  | -0.527732 | 1.99E-05 | hypomethylated |
| cg26588076 | 0.61895 | 0.429282162 | -0.527897 | 0.00095  | hypomethylated |
| cg04447128 | 0.55299 | 0.383513514 | -0.527976 | 2.38E-05 | hypomethylated |
| cg15803845 | 0.57807 | 0.400872973 | -0.528099 | 0.000107 | hypomethylated |
| cg09528494 | 0.63333 | 0.439162703 | -0.528202 | 1.12E-05 | hypomethylated |
| cg21658968 | 0.71923 | 0.498687568 | -0.528317 | 7.29E-05 | hypomethylated |
| cg26336935 | 0.48945 | 0.339359459 | -0.528347 | 0.000219 | hypomethylated |
| cg17668756 | 0.64182 | 0.445003784 | -0.528351 | 8.60E-06 | hypomethylated |
| cg04767756 | 0.68574 | 0.475431351 | -0.528425 | 7.47E-05 | hypomethylated |
| cg15350661 | 0.54755 | 0.379622162 | -0.528426 | 4.64E-05 | hypomethylated |
| cg08701429 | 0.77322 | 0.536014595 | -0.528607 | 3.85E-05 | hypomethylated |
| cg10764891 | 0.77104 | 0.534496757 | -0.528625 | 5.06E-05 | hypomethylated |
| cg06991495 | 0.34301 | 0.237774595 | -0.528656 | 0.001118 | hypomethylated |
| cg13071185 | 0.65667 | 0.455197297 | -0.528677 | 0.000374 | hypomethylated |
| cg26758396 | 0.62611 | 0.43401027  | -0.528687 | 5.06E-05 | hypomethylated |
| cg13219080 | 0.72126 | 0.499945946 | -0.528747 | 1.15E-05 | hypomethylated |
| cg26874999 | 0.84435 | 0.585262162 | -0.528758 | 8.83E-06 | hypomethylated |
| cg21293464 | 0.5033  | 0.348852432 | -0.528802 | 0.007933 | hypomethylated |

|            |         |             |           |          |                |
|------------|---------|-------------|-----------|----------|----------------|
| cg04301614 | 0.63273 | 0.438563784 | -0.528803 | 0.00028  | hypomethylated |
| cg25522867 | 0.55485 | 0.384557838 | -0.528897 | 9.05E-05 | hypomethylated |
| cg05155047 | 0.57784 | 0.400485946 | -0.528918 | 0.000104 | hypomethylated |
| cg02998240 | 0.55455 | 0.384336757 | -0.528947 | 9.38E-05 | hypomethylated |
| cg21890646 | 0.74627 | 0.517199459 | -0.528977 | 0.00054  | hypomethylated |
| cg01930756 | 0.58544 | 0.405714595 | -0.529056 | 6.54E-05 | hypomethylated |
| cg09462806 | 0.53162 | 0.368401622 | -0.529116 | 0.00099  | hypomethylated |
| cg26215727 | 0.47039 | 0.325962703 | -0.52915  | 0.001237 | hypomethylated |
| cg13313836 | 0.71543 | 0.495738919 | -0.52923  | 0.000893 | hypomethylated |
| cg06932535 | 0.73165 | 0.506973514 | -0.529243 | 0.000563 | hypomethylated |
| cg08179817 | 0.51178 | 0.354601622 | -0.529325 | 0.000195 | hypomethylated |
| cg12274898 | 0.79088 | 0.547977297 | -0.529343 | 3.21E-06 | hypomethylated |
| cg02096790 | 0.8063  | 0.558636757 | -0.529406 | 5.14E-06 | hypomethylated |
| cg02550119 | 0.67674 | 0.468862162 | -0.529438 | 4.70E-05 | hypomethylated |
| cg11203211 | 0.83793 | 0.580444865 | -0.529671 | 2.05E-06 | hypomethylated |
| cg05713242 | 0.54139 | 0.375023784 | -0.529686 | 0.009238 | hypomethylated |
| cg07002540 | 0.83667 | 0.579560541 | -0.529699 | 4.10E-05 | hypomethylated |
| cg18894552 | 0.75665 | 0.524107027 | -0.529765 | 6.75E-06 | hypomethylated |
| cg08772789 | 0.5934  | 0.411014595 | -0.529815 | 0.0006   | hypomethylated |
| cg23536675 | 0.88245 | 0.611132432 | -0.530029 | 8.15E-06 | hypomethylated |
| cg09864345 | 0.82395 | 0.5706      | -0.530077 | 1.66E-05 | hypomethylated |
| cg23976388 | 0.66401 | 0.45983027  | -0.530104 | 0.000191 | hypomethylated |
| cg12065616 | 0.53822 | 0.372704324 | -0.530164 | 9.83E-05 | hypomethylated |
| cg21376090 | 0.73037 | 0.505747568 | -0.53021  | 0.00017  | hypomethylated |
| cg25376491 | 0.62439 | 0.432342703 | -0.530272 | 0.000143 | hypomethylated |
| cg04593696 | 0.52724 | 0.365025405 | -0.530463 | 0.000229 | hypomethylated |
| cg24310786 | 0.41328 | 0.286125946 | -0.530469 | 0.000839 | hypomethylated |
| cg14055004 | 0.60523 | 0.419018378 | -0.53047  | 5.19E-05 | hypomethylated |
| cg08831077 | 0.6899  | 0.477618919 | -0.530527 | 0.000165 | hypomethylated |
| cg00357958 | 0.43951 | 0.30427027  | -0.530543 | 0.00098  | hypomethylated |
| cg01458495 | 0.80993 | 0.560687568 | -0.5306   | 1.58E-06 | hypomethylated |
| cg03708045 | 0.74897 | 0.518482703 | -0.530612 | 2.89E-05 | hypomethylated |
| cg11346718 | 0.57519 | 0.398177297 | -0.530628 | 7.72E-06 | hypomethylated |
| cg27338302 | 0.69885 | 0.483754595 | -0.530707 | 9.69E-06 | hypomethylated |
| cg11136562 | 0.62689 | 0.43394     | -0.530717 | 2.15E-05 | hypomethylated |
| cg14076239 | 0.67934 | 0.470240541 | -0.530735 | 0.000474 | hypomethylated |
| cg21839856 | 0.69967 | 0.484308649 | -0.530748 | 2.21E-05 | hypomethylated |
| cg10960266 | 0.78962 | 0.546559459 | -0.53078  | 1.66E-05 | hypomethylated |
| cg12177087 | 0.88798 | 0.614588649 | -0.530906 | 8.15E-06 | hypomethylated |
| cg23752828 | 0.63292 | 0.438038378 | -0.530966 | 0.001395 | hypomethylated |
| cg03112033 | 0.7715  | 0.533948108 | -0.530967 | 1.64E-05 | hypomethylated |
| cg13178170 | 0.78051 | 0.540183784 | -0.530967 | 1.84E-05 | hypomethylated |
| cg00328227 | 0.59213 | 0.409807027 | -0.530969 | 0.000214 | hypomethylated |
| cg21293455 | 0.81469 | 0.563831351 | -0.530987 | 1.80E-05 | hypomethylated |
| cg03079132 | 0.55164 | 0.381769189 | -0.531026 | 2.35E-05 | hypomethylated |
| cg00089814 | 0.68985 | 0.47741027  | -0.531053 | 4.47E-05 | hypomethylated |
| cg25839663 | 0.73682 | 0.509907027 | -0.531078 | 4.42E-06 | hypomethylated |
| cg08196512 | 0.7646  | 0.529122162 | -0.531104 | 3.76E-05 | hypomethylated |
| cg18541087 | 0.77071 | 0.533325405 | -0.531172 | 1.04E-05 | hypomethylated |
| cg04465154 | 0.49427 | 0.342016757 | -0.531232 | 0.000495 | hypomethylated |
| cg21560076 | 0.68879 | 0.476615135 | -0.531239 | 0.000123 | hypomethylated |
| cg07412254 | 0.66023 | 0.456839459 | -0.531281 | 2.51E-05 | hypomethylated |
| cg22481448 | 0.90801 | 0.628224865 | -0.531427 | 6.15E-05 | hypomethylated |
| cg08324925 | 0.71254 | 0.492955676 | -0.531513 | 4.01E-06 | hypomethylated |
| cg16861209 | 0.82515 | 0.570823784 | -0.531611 | 4.24E-06 | hypomethylated |
| cg03049863 | 0.45017 | 0.311332432 | -0.532014 | 0.000135 | hypomethylated |
| cg07925415 | 0.47614 | 0.329289189 | -0.532031 | 0.000212 | hypomethylated |
| cg11181587 | 0.72472 | 0.501200541 | -0.532036 | 5.73E-06 | hypomethylated |

|            |         |             |           |          |                |
|------------|---------|-------------|-----------|----------|----------------|
| cg19704102 | 0.79953 | 0.552904865 | -0.532121 | 1.35E-05 | hypomethylated |
| cg25745642 | 0.56376 | 0.389818378 | -0.532279 | 4.60E-06 | hypomethylated |
| cg25957300 | 0.86478 | 0.597907568 | -0.532411 | 1.84E-05 | hypomethylated |
| cg12381074 | 0.8602  | 0.594728649 | -0.532441 | 6.39E-06 | hypomethylated |
| cg26644674 | 0.79165 | 0.547324324 | -0.532467 | 3.07E-05 | hypomethylated |
| cg07474269 | 0.83058 | 0.574229189 | -0.532492 | 1.05E-06 | hypomethylated |
| cg25556008 | 0.82015 | 0.566997838 | -0.532545 | 9.57E-06 | hypomethylated |
| cg23897302 | 0.69847 | 0.482855676 | -0.532606 | 1.89E-05 | hypomethylated |
| cg23740652 | 0.69854 | 0.482892432 | -0.532641 | 0.000126 | hypomethylated |
| cg11556164 | 0.83285 | 0.575726486 | -0.532673 | 1.63E-06 | hypomethylated |
| cg21794767 | 0.83171 | 0.574895676 | -0.53278  | 8.15E-06 | hypomethylated |
| cg09874659 | 0.89488 | 0.618525946 | -0.53286  | 8.15E-06 | hypomethylated |
| cg05035061 | 0.58951 | 0.407454595 | -0.532877 | 3.32E-05 | hypomethylated |
| cg03710889 | 0.60897 | 0.420901081 | -0.53289  | 9.49E-05 | hypomethylated |
| cg02049833 | 0.85199 | 0.588841081 | -0.532958 | 2.32E-05 | hypomethylated |
| cg04164584 | 0.78058 | 0.539468108 | -0.533009 | 2.10E-06 | hypomethylated |
| cg20788020 | 0.74597 | 0.515486486 | -0.533183 | 4.94E-05 | hypomethylated |
| cg00460916 | 0.74308 | 0.513489189 | -0.533184 | 5.86E-05 | hypomethylated |
| cg16960396 | 0.79246 | 0.547583784 | -0.533258 | 4.60E-06 | hypomethylated |
| cg20029881 | 0.59223 | 0.409208649 | -0.533321 | 4.31E-05 | hypomethylated |
| cg07010486 | 0.60411 | 0.417411892 | -0.53334  | 1.01E-05 | hypomethylated |
| cg14105536 | 0.81536 | 0.56335027  | -0.533405 | 3.85E-06 | hypomethylated |
| cg01604401 | 0.72272 | 0.499284324 | -0.533575 | 8.83E-06 | hypomethylated |
| cg03879160 | 0.8123  | 0.56116973  | -0.533575 | 4.24E-06 | hypomethylated |
| cg25254739 | 0.46076 | 0.318305405 | -0.533604 | 3.57E-05 | hypomethylated |
| cg13569051 | 0.55739 | 0.385042703 | -0.533669 | 0.0006   | hypomethylated |
| cg21723559 | 0.574   | 0.396512973 | -0.533683 | 6.01E-05 | hypomethylated |
| cg04147642 | 0.31015 | 0.214247568 | -0.533687 | 0.002432 | hypomethylated |
| cg22517356 | 0.53265 | 0.367940541 | -0.533715 | 8.03E-05 | hypomethylated |
| cg01609268 | 0.90001 | 0.621699459 | -0.533724 | 7.32E-06 | hypomethylated |
| cg13630878 | 0.85068 | 0.587621622 | -0.533729 | 6.75E-06 | hypomethylated |
| cg07052524 | 0.85527 | 0.590746486 | -0.533841 | 0.000126 | hypomethylated |
| cg09103187 | 0.90375 | 0.624223243 | -0.533862 | 1.63E-06 | hypomethylated |
| cg01854676 | 0.87134 | 0.601827568 | -0.533886 | 1.04E-05 | hypomethylated |
| cg19901403 | 0.57348 | 0.39606973  | -0.533989 | 0.00013  | hypomethylated |
| cg07473553 | 0.80068 | 0.552953514 | -0.534068 | 8.84E-05 | hypomethylated |
| cg05226729 | 0.80685 | 0.557187027 | -0.534139 | 8.83E-06 | hypomethylated |
| cg00117599 | 0.45383 | 0.313392432 | -0.534182 | 3.32E-05 | hypomethylated |
| cg17462560 | 0.61828 | 0.426944865 | -0.534211 | 0.000306 | hypomethylated |
| cg27588093 | 0.67983 | 0.469447027 | -0.534212 | 6.30E-06 | hypomethylated |
| cg01569083 | 0.55283 | 0.381738378 | -0.534252 | 0.001041 | hypomethylated |
| cg24631735 | 0.81691 | 0.564082703 | -0.53427  | 3.69E-06 | hypomethylated |
| cg25574175 | 0.79985 | 0.552286486 | -0.534313 | 6.39E-06 | hypomethylated |
| cg15962197 | 0.5959  | 0.411414595 | -0.534477 | 8.94E-05 | hypomethylated |
| cg16683508 | 0.84322 | 0.582074595 | -0.534705 | 9.82E-06 | hypomethylated |
| cg14900031 | 0.79903 | 0.551548108 | -0.534763 | 5.28E-06 | hypomethylated |
| cg07572930 | 0.71316 | 0.492219459 | -0.534924 | 6.22E-06 | hypomethylated |
| cg24730705 | 0.65617 | 0.452882703 | -0.534932 | 1.04E-05 | hypomethylated |
| cg25073708 | 0.61405 | 0.423803784 | -0.53496  | 0.00024  | hypomethylated |
| cg17030820 | 0.83136 | 0.573781622 | -0.534972 | 3.59E-06 | hypomethylated |
| cg23512558 | 0.45207 | 0.311979459 | -0.535095 | 0.000426 | hypomethylated |
| cg05802386 | 0.74113 | 0.511463243 | -0.535096 | 7.62E-06 | hypomethylated |
| cg14796755 | 0.78579 | 0.542261622 | -0.535155 | 7.62E-06 | hypomethylated |
| cg00665114 | 0.79932 | 0.551588108 | -0.535182 | 3.67E-05 | hypomethylated |
| cg01761729 | 0.59822 | 0.412812973 | -0.535188 | 2.15E-05 | hypomethylated |
| cg25054816 | 0.70442 | 0.486069189 | -0.535274 | 3.39E-06 | hypomethylated |
| cg15244778 | 0.73984 | 0.510475135 | -0.535373 | 0.000191 | hypomethylated |
| cg19676502 | 0.61623 | 0.425159459 | -0.535465 | 0.004059 | hypomethylated |



|            |         |             |           |          |                |
|------------|---------|-------------|-----------|----------|----------------|
| cg27356115 | 0.71785 | 0.495259459 | -0.535498 | 0.0003   | hypomethylated |
| cg18186771 | 0.86428 | 0.596283243 | -0.535501 | 3.12E-06 | hypomethylated |
| cg02198988 | 0.62342 | 0.430091351 | -0.535561 | 5.06E-05 | hypomethylated |
| cg20721738 | 0.43281 | 0.298577297 | -0.535629 | 0.0017   | hypomethylated |
| cg27185793 | 0.5607  | 0.386778378 | -0.535722 | 0.000161 | hypomethylated |
| cg16960046 | 0.74067 | 0.510922162 | -0.535727 | 2.99E-06 | hypomethylated |
| cg02124184 | 0.64569 | 0.445378919 | -0.535808 | 1.40E-05 | hypomethylated |
| cg13587915 | 0.73772 | 0.508805946 | -0.535958 | 6.15E-05 | hypomethylated |
| cg13829849 | 0.81584 | 0.562668649 | -0.536001 | 1.15E-05 | hypomethylated |
| cg09651136 | 0.6077  | 0.41908973  | -0.5361   | 4.26E-05 | hypomethylated |
| cg26300517 | 0.72599 | 0.500627027 | -0.536213 | 0.0006   | hypomethylated |
| cg25649765 | 0.70067 | 0.483163784 | -0.536223 | 7.65E-05 | hypomethylated |
| cg24056365 | 0.64477 | 0.444605405 | -0.536259 | 0.000159 | hypomethylated |
| cg24520862 | 0.7109  | 0.4902      | -0.536276 | 0.000123 | hypomethylated |
| cg12537329 | 0.7679  | 0.529492973 | -0.536307 | 2.18E-05 | hypomethylated |
| cg19524238 | 0.75128 | 0.518025946 | -0.536326 | 0.000123 | hypomethylated |
| cg18763629 | 0.68863 | 0.474821622 | -0.536343 | 2.64E-05 | hypomethylated |
| cg27207756 | 0.68278 | 0.470775676 | -0.536381 | 5.45E-05 | hypomethylated |
| cg26232247 | 0.56581 | 0.390075135 | -0.536566 | 0.005085 | hypomethylated |
| cg25637972 | 0.77353 | 0.533240541 | -0.536671 | 0.000129 | hypomethylated |
| cg17179881 | 0.31041 | 0.213981081 | -0.536692 | 3.49E-05 | hypomethylated |
| cg13043815 | 0.76905 | 0.530139459 | -0.536705 | 8.15E-06 | hypomethylated |
| cg11895596 | 0.74755 | 0.515314595 | -0.536717 | 2.21E-05 | hypomethylated |
| cg08374494 | 0.61973 | 0.427166486 | -0.536841 | 5.43E-06 | hypomethylated |
| cg17934470 | 0.6206  | 0.427713514 | -0.537019 | 0.000358 | hypomethylated |
| cg00805193 | 0.57948 | 0.399341081 | -0.537137 | 5.06E-05 | hypomethylated |
| cg22046201 | 0.71957 | 0.49588     | -0.537144 | 0.000726 | hypomethylated |
| cg01182455 | 0.65072 | 0.448431351 | -0.53715  | 0.001481 | hypomethylated |
| cg05673892 | 0.84587 | 0.582914054 | -0.537153 | 3.90E-06 | hypomethylated |
| cg05871756 | 0.65743 | 0.45302973  | -0.537232 | 0.000115 | hypomethylated |
| cg16113793 | 0.51325 | 0.353665405 | -0.537277 | 0.001667 | hypomethylated |
| cg14736458 | 0.54992 | 0.378911351 | -0.537361 | 0.000506 | hypomethylated |
| cg24911891 | 0.8706  | 0.599828108 | -0.537461 | 0.000129 | hypomethylated |
| cg14327359 | 0.85363 | 0.588098378 | -0.537553 | 1.56E-06 | hypomethylated |
| cg03222834 | 0.66088 | 0.45529027  | -0.537602 | 0.000117 | hypomethylated |
| cg20602843 | 0.63828 | 0.439715135 | -0.53762  | 8.32E-05 | hypomethylated |
| cg24124145 | 0.41055 | 0.282826486 | -0.537641 | 3.32E-05 | hypomethylated |
| cg21454362 | 0.61459 | 0.423355135 | -0.537756 | 8.84E-05 | hypomethylated |
| cg11092836 | 0.66574 | 0.458520541 | -0.537972 | 1.42E-05 | hypomethylated |
| cg07632771 | 0.7555  | 0.520295676 | -0.5381   | 4.05E-05 | hypomethylated |
| cg06048910 | 0.90002 | 0.619756757 | -0.538255 | 1.28E-05 | hypomethylated |
| cg00832644 | 0.78113 | 0.537876216 | -0.538288 | 1.99E-06 | hypomethylated |
| cg07520919 | 0.62795 | 0.432363243 | -0.538406 | 3.79E-06 | hypomethylated |
| cg10979364 | 0.77683 | 0.534865946 | -0.538422 | 4.64E-05 | hypomethylated |
| cg24561305 | 0.50381 | 0.346876757 | -0.538457 | 3.49E-05 | hypomethylated |
| cg04737759 | 0.80373 | 0.553364324 | -0.538481 | 1.80E-05 | hypomethylated |
| cg18149745 | 0.73686 | 0.507321081 | -0.538491 | 1.94E-05 | hypomethylated |
| cg08795557 | 0.75223 | 0.517893514 | -0.538518 | 7.52E-06 | hypomethylated |
| cg09438113 | 0.49282 | 0.339269189 | -0.53863  | 1.01E-05 | hypomethylated |
| cg21008969 | 0.5235  | 0.360373514 | -0.538697 | 0.000245 | hypomethylated |
| cg23385208 | 0.58776 | 0.404598919 | -0.538735 | 0.000104 | hypomethylated |
| cg12147622 | 0.56636 | 0.389821081 | -0.538907 | 0.00035  | hypomethylated |
| cg03961030 | 0.87903 | 0.605021081 | -0.538927 | 2.13E-06 | hypomethylated |
| cg21817750 | 0.82499 | 0.567817297 | -0.53895  | 3.30E-06 | hypomethylated |
| cg11641006 | 0.50907 | 0.350369189 | -0.538988 | 0.000178 | hypomethylated |
| cg14082893 | 0.69656 | 0.479407568 | -0.538995 | 0.000893 | hypomethylated |
| cg04175872 | 0.51316 | 0.353176216 | -0.539021 | 0.002803 | hypomethylated |
| cg12186771 | 0.69155 | 0.475947027 | -0.539033 | 0.001768 | hypomethylated |

|            |         |             |           |          |                |
|------------|---------|-------------|-----------|----------|----------------|
| cg07421969 | 0.71363 | 0.491121622 | -0.539096 | 9.66E-07 | hypomethylated |
| cg24599709 | 0.87899 | 0.604874054 | -0.539212 | 6.22E-06 | hypomethylated |
| cg08410533 | 0.51465 | 0.354145405 | -0.53925  | 0.000306 | hypomethylated |
| cg18332838 | 0.7495  | 0.515685946 | -0.539436 | 0.000335 | hypomethylated |
| cg14133064 | 0.44834 | 0.308458919 | -0.539515 | 0.000741 | hypomethylated |
| cg14935206 | 0.57825 | 0.397815676 | -0.539593 | 0.004608 | hypomethylated |
| cg06495763 | 0.75583 | 0.519945405 | -0.539702 | 9.82E-06 | hypomethylated |
| cg05302095 | 0.75692 | 0.520677838 | -0.53975  | 6.39E-06 | hypomethylated |
| cg17544584 | 0.77207 | 0.531016757 | -0.539974 | 6.05E-06 | hypomethylated |
| cg06473276 | 0.54931 | 0.377784865 | -0.540056 | 0.001821 | hypomethylated |
| cg04505972 | 0.78379 | 0.539009189 | -0.540157 | 5.73E-06 | hypomethylated |
| cg16576160 | 0.67337 | 0.463052432 | -0.540224 | 4.36E-05 | hypomethylated |
| cg00417147 | 0.78731 | 0.541254595 | -0.540624 | 1.42E-05 | hypomethylated |
| cg09966309 | 0.65587 | 0.450879459 | -0.540668 | 0.0003   | hypomethylated |
| cg26280911 | 0.52855 | 0.363318378 | -0.540806 | 0.003078 | hypomethylated |
| cg19554457 | 0.60969 | 0.419056216 | -0.540932 | 0.000126 | hypomethylated |
| cg26992245 | 0.67955 | 0.467038378 | -0.541039 | 0.000109 | hypomethylated |
| cg07679836 | 0.34639 | 0.238064324 | -0.541046 | 0.000195 | hypomethylated |
| cg04042248 | 0.4989  | 0.342874595 | -0.54107  | 0.000107 | hypomethylated |
| cg19683417 | 0.84456 | 0.580430811 | -0.541076 | 3.59E-06 | hypomethylated |
| cg19707677 | 0.84008 | 0.577319459 | -0.541157 | 8.04E-06 | hypomethylated |
| cg05573767 | 0.55403 | 0.380727027 | -0.541207 | 0.001275 | hypomethylated |
| cg08686879 | 0.76441 | 0.525275135 | -0.541273 | 1.49E-06 | hypomethylated |
| cg25612480 | 0.59778 | 0.410665946 | -0.541649 | 8.15E-06 | hypomethylated |
| cg08777211 | 0.83489 | 0.573548108 | -0.541672 | 2.71E-06 | hypomethylated |
| cg24681963 | 0.63749 | 0.437908108 | -0.541775 | 3.23E-05 | hypomethylated |
| cg22900681 | 0.4999  | 0.343378378 | -0.54184  | 0.000342 | hypomethylated |
| cg16909914 | 0.38545 | 0.264762162 | -0.541847 | 0.000159 | hypomethylated |
| cg09566023 | 0.7261  | 0.498734054 | -0.541898 | 3.32E-05 | hypomethylated |
| cg11861562 | 0.61635 | 0.423337297 | -0.541942 | 0.00039  | hypomethylated |
| cg10492657 | 0.74567 | 0.512146486 | -0.541981 | 2.79E-06 | hypomethylated |
| cg07734975 | 0.7958  | 0.54654     | -0.542079 | 0.000517 | hypomethylated |
| cg06966245 | 0.64335 | 0.441806486 | -0.542189 | 6.15E-05 | hypomethylated |
| cg24744557 | 0.4703  | 0.322953514 | -0.542255 | 0.000224 | hypomethylated |
| cg16152136 | 0.66617 | 0.457439459 | -0.54231  | 0.00039  | hypomethylated |
| cg25677394 | 0.70003 | 0.480681081 | -0.542337 | 2.45E-05 | hypomethylated |
| cg21211730 | 0.64986 | 0.446223243 | -0.542363 | 3.07E-05 | hypomethylated |
| cg03604774 | 0.75426 | 0.517867027 | -0.54248  | 7.29E-05 | hypomethylated |
| cg27139457 | 0.74574 | 0.512015135 | -0.542486 | 9.31E-06 | hypomethylated |
| cg14679668 | 0.80012 | 0.549338378 | -0.542521 | 1.35E-05 | hypomethylated |
| cg25843426 | 0.54713 | 0.375627027 | -0.542583 | 3.85E-05 | hypomethylated |
| cg07402003 | 0.86401 | 0.593167027 | -0.54261  | 1.93E-06 | hypomethylated |
| cg03203287 | 0.86137 | 0.591349189 | -0.542623 | 9.57E-06 | hypomethylated |
| cg02402368 | 0.60345 | 0.41424     | -0.542767 | 0.000464 | hypomethylated |
| cg03778909 | 0.81602 | 0.560157297 | -0.542773 | 3.23E-05 | hypomethylated |
| cg13002506 | 0.82259 | 0.564663243 | -0.542783 | 4.70E-05 | hypomethylated |
| cg24724917 | 0.79413 | 0.545104865 | -0.542841 | 1.06E-05 | hypomethylated |
| cg22229039 | 0.7049  | 0.483836757 | -0.542898 | 0.00054  | hypomethylated |
| cg03266686 | 0.50073 | 0.343682703 | -0.542956 | 4.26E-05 | hypomethylated |
| cg16949584 | 0.70658 | 0.484888649 | -0.543199 | 8.59E-07 | hypomethylated |
| cg24375627 | 0.51341 | 0.352321081 | -0.543221 | 0.000161 | hypomethylated |
| cg20124376 | 0.83927 | 0.575935676 | -0.543227 | 6.39E-06 | hypomethylated |
| cg14003231 | 0.45028 | 0.308983243 | -0.543294 | 9.72E-05 | hypomethylated |
| cg18891604 | 0.77317 | 0.53050973  | -0.543406 | 1.58E-05 | hypomethylated |
| cg13300246 | 0.55254 | 0.379086486 | -0.543552 | 5.72E-05 | hypomethylated |
| cg04646987 | 0.88168 | 0.604877838 | -0.543611 | 0.000216 | hypomethylated |
| cg25738786 | 0.56572 | 0.388096216 | -0.543674 | 0.00095  | hypomethylated |
| cg08514385 | 0.66776 | 0.458088649 | -0.543703 | 0.000187 | hypomethylated |

|            |         |             |           |          |                |
|------------|---------|-------------|-----------|----------|----------------|
| cg24289912 | 0.59881 | 0.410757838 | -0.54381  | 0.000797 | hypomethylated |
| cg14240790 | 0.62357 | 0.427664865 | -0.544071 | 0.000176 | hypomethylated |
| cg19547192 | 0.85512 | 0.586416216 | -0.544202 | 9.49E-05 | hypomethylated |
| cg11146034 | 0.63436 | 0.435023784 | -0.544208 | 0.000772 | hypomethylated |
| cg09435411 | 0.81656 | 0.559955676 | -0.544246 | 4.60E-06 | hypomethylated |
| cg06123346 | 0.61735 | 0.423347027 | -0.544248 | 1.39E-05 | hypomethylated |
| cg03985360 | 0.64181 | 0.440091892 | -0.544341 | 0.000667 | hypomethylated |
| cg09715009 | 0.7154  | 0.490531351 | -0.544405 | 3.19E-05 | hypomethylated |
| cg20530056 | 0.52298 | 0.358572973 | -0.544489 | 1.31E-05 | hypomethylated |
| cg00491404 | 0.73782 | 0.505867568 | -0.544509 | 1.26E-06 | hypomethylated |
| cg09225287 | 0.74714 | 0.512238378 | -0.544563 | 0.000726 | hypomethylated |
| cg19729744 | 0.65852 | 0.451454595 | -0.544646 | 9.27E-05 | hypomethylated |
| cg19092396 | 0.44607 | 0.305784324 | -0.544756 | 0.00024  | hypomethylated |
| cg23083049 | 0.79989 | 0.548329189 | -0.544759 | 2.87E-06 | hypomethylated |
| cg20835708 | 0.38936 | 0.266897838 | -0.544817 | 0.002274 | hypomethylated |
| cg17215278 | 0.62047 | 0.425310811 | -0.544844 | 0.000474 | hypomethylated |
| cg06912282 | 0.67787 | 0.464649189 | -0.544867 | 3.23E-05 | hypomethylated |
| cg21640654 | 0.75896 | 0.520165946 | -0.545052 | 3.59E-06 | hypomethylated |
| cg14487665 | 0.93426 | 0.640283784 | -0.545113 | 1.01E-05 | hypomethylated |
| cg20268689 | 0.73717 | 0.505187027 | -0.54518  | 2.71E-05 | hypomethylated |
| cg11019923 | 0.4791  | 0.32828973  | -0.545357 | 2.87E-06 | hypomethylated |
| cg07191839 | 0.64988 | 0.445291892 | -0.545422 | 8.42E-05 | hypomethylated |
| cg25030266 | 0.7089  | 0.485657297 | -0.545643 | 3.59E-06 | hypomethylated |
| cg07125112 | 0.37445 | 0.256526486 | -0.545665 | 5.58E-05 | hypomethylated |
| cg24343430 | 0.64593 | 0.442508649 | -0.545672 | 6.78E-05 | hypomethylated |
| cg12850892 | 0.4425  | 0.303121081 | -0.545783 | 0.000178 | hypomethylated |
| cg12407070 | 0.77661 | 0.531945946 | -0.545911 | 1.80E-05 | hypomethylated |
| cg15428620 | 0.42349 | 0.290063784 | -0.545958 | 0.0017   | hypomethylated |
| cg22834542 | 0.86291 | 0.590985405 | -0.546088 | 1.80E-05 | hypomethylated |
| cg27314422 | 0.57646 | 0.39474     | -0.546318 | 3.49E-06 | hypomethylated |
| cg03085949 | 0.81669 | 0.559203784 | -0.546414 | 9.07E-06 | hypomethylated |
| cg20770006 | 0.51263 | 0.350976757 | -0.546542 | 0.000191 | hypomethylated |
| cg23048494 | 0.5942  | 0.406803784 | -0.546616 | 3.15E-05 | hypomethylated |
| cg27299047 | 0.62711 | 0.429322703 | -0.546656 | 0.000293 | hypomethylated |
| cg08478685 | 0.61685 | 0.422287568 | -0.546694 | 0.000875 | hypomethylated |
| cg26126806 | 0.49051 | 0.335773514 | -0.546794 | 0.001031 | hypomethylated |
| cg20329220 | 0.44632 | 0.305485405 | -0.546975 | 0.000132 | hypomethylated |
| cg15401418 | 0.68873 | 0.471392973 | -0.547008 | 0.000454 | hypomethylated |
| cg07068980 | 0.63473 | 0.434416757 | -0.547063 | 4.10E-05 | hypomethylated |
| cg03140135 | 0.42335 | 0.289738919 | -0.547097 | 0.001603 | hypomethylated |
| cg25203286 | 0.64682 | 0.442678378 | -0.547105 | 0.000191 | hypomethylated |
| cg18014547 | 0.76325 | 0.522342162 | -0.547161 | 1.15E-05 | hypomethylated |
| cg09186101 | 0.74543 | 0.510135135 | -0.547193 | 2.10E-06 | hypomethylated |
| cg23830540 | 0.70001 | 0.478995135 | -0.547365 | 4.36E-05 | hypomethylated |
| cg08142884 | 0.84518 | 0.578305405 | -0.547427 | 3.11E-05 | hypomethylated |
| cg25840926 | 0.49103 | 0.335972432 | -0.547468 | 5.19E-05 | hypomethylated |
| cg03875819 | 0.73923 | 0.505779459 | -0.547515 | 0.000417 | hypomethylated |
| cg07059925 | 0.56141 | 0.384107027 | -0.547546 | 4.58E-05 | hypomethylated |
| cg06344474 | 0.7831  | 0.535728108 | -0.547696 | 1.72E-06 | hypomethylated |
| cg07348845 | 0.54984 | 0.376131892 | -0.547773 | 0.000152 | hypomethylated |
| cg04431346 | 0.58118 | 0.397554054 | -0.547834 | 3.40E-05 | hypomethylated |
| cg10655396 | 0.44573 | 0.304895676 | -0.547854 | 0.003441 | hypomethylated |
| cg21214743 | 0.60625 | 0.414567027 | -0.548307 | 8.60E-06 | hypomethylated |
| cg21591452 | 0.78892 | 0.539464324 | -0.548351 | 2.75E-06 | hypomethylated |
| cg26107476 | 0.63099 | 0.431407568 | -0.548566 | 5.19E-05 | hypomethylated |
| cg11737334 | 0.51224 | 0.350201081 | -0.548636 | 0.00095  | hypomethylated |
| cg10433327 | 0.78377 | 0.535828649 | -0.548659 | 1.80E-05 | hypomethylated |
| cg10103635 | 0.55107 | 0.376731351 | -0.548699 | 0.000268 | hypomethylated |

|            |         |             |           |          |                |
|------------|---------|-------------|-----------|----------|----------------|
| cg26211060 | 0.80334 | 0.549165946 | -0.548769 | 2.05E-06 | hypomethylated |
| cg00182893 | 0.69487 | 0.475       | -0.548816 | 0.000107 | hypomethylated |
| cg19113920 | 0.58457 | 0.399574595 | -0.548911 | 0.000191 | hypomethylated |
| cg12615982 | 0.53039 | 0.362535676 | -0.548931 | 0.000262 | hypomethylated |
| cg25898076 | 0.45623 | 0.311838919 | -0.54896  | 0.000107 | hypomethylated |
| cg03030267 | 0.69306 | 0.473712432 | -0.548969 | 5.72E-05 | hypomethylated |
| cg05655953 | 0.94671 | 0.647074054 | -0.548992 | 2.99E-06 | hypomethylated |
| cg20827128 | 0.6391  | 0.436807027 | -0.549046 | 0.000667 | hypomethylated |
| cg09182678 | 0.53543 | 0.365936216 | -0.549106 | 0.002231 | hypomethylated |
| cg00948520 | 0.70446 | 0.481368649 | -0.549376 | 4.94E-05 | hypomethylated |
| cg01612247 | 0.78811 | 0.538526486 | -0.54938  | 0.00024  | hypomethylated |
| cg12580943 | 0.71394 | 0.487794054 | -0.549531 | 7.38E-05 | hypomethylated |
| cg13329242 | 0.55069 | 0.376244865 | -0.549569 | 4.47E-05 | hypomethylated |
| cg20772593 | 0.78139 | 0.53383027  | -0.549662 | 8.83E-06 | hypomethylated |
| cg22509504 | 0.6322  | 0.431895135 | -0.5497   | 9.95E-05 | hypomethylated |
| cg09461545 | 0.5009  | 0.34214973  | -0.549895 | 0.000174 | hypomethylated |
| cg14526021 | 0.84256 | 0.575505946 | -0.549949 | 6.54E-05 | hypomethylated |
| cg13473184 | 0.86818 | 0.592992973 | -0.549979 | 1.20E-05 | hypomethylated |
| cg14996583 | 0.55887 | 0.381689189 | -0.550114 | 0.000229 | hypomethylated |
| cg10869531 | 0.7373  | 0.503522703 | -0.550195 | 9.07E-06 | hypomethylated |
| cg17021798 | 0.76826 | 0.524664865 | -0.550198 | 3.49E-06 | hypomethylated |
| cg18326022 | 0.87926 | 0.600446486 | -0.550254 | 8.15E-06 | hypomethylated |
| cg19846154 | 0.79886 | 0.545538919 | -0.550261 | 5.86E-05 | hypomethylated |
| cg17371070 | 0.81245 | 0.554783243 | -0.550355 | 1.12E-05 | hypomethylated |
| cg10262032 | 0.56813 | 0.387937297 | -0.550398 | 0.000176 | hypomethylated |
| cg05606455 | 0.76448 | 0.521977297 | -0.550492 | 5.43E-06 | hypomethylated |
| cg03079497 | 0.56519 | 0.385889189 | -0.550549 | 0.002649 | hypomethylated |
| cg13156207 | 0.79213 | 0.540829189 | -0.550564 | 7.65E-05 | hypomethylated |
| cg17213713 | 0.56193 | 0.383638919 | -0.550641 | 0.000117 | hypomethylated |
| cg13424302 | 0.61937 | 0.422850811 | -0.550653 | 0.000511 | hypomethylated |
| cg17735531 | 0.61966 | 0.423048649 | -0.550653 | 0.000152 | hypomethylated |
| cg09938443 | 0.75645 | 0.516413514 | -0.550718 | 2.32E-05 | hypomethylated |
| cg16512144 | 0.53688 | 0.366491351 | -0.550821 | 0.000287 | hypomethylated |
| cg03573390 | 0.76427 | 0.521698378 | -0.550866 | 0.000107 | hypomethylated |
| cg22153994 | 0.81144 | 0.553881081 | -0.550908 | 2.15E-05 | hypomethylated |
| cg05860566 | 0.54601 | 0.372689189 | -0.550954 | 7.83E-06 | hypomethylated |
| cg17143179 | 0.66262 | 0.452257838 | -0.551036 | 5.19E-05 | hypomethylated |
| cg06099014 | 0.78142 | 0.533332432 | -0.551063 | 2.29E-06 | hypomethylated |
| cg01777586 | 0.72088 | 0.491997297 | -0.551109 | 4.48E-06 | hypomethylated |
| cg18292904 | 0.93457 | 0.637766486 | -0.551274 | 6.39E-06 | hypomethylated |
| cg10122877 | 0.70572 | 0.481571892 | -0.551345 | 7.32E-06 | hypomethylated |
| cg22972055 | 0.73426 | 0.500996216 | -0.551491 | 3.23E-05 | hypomethylated |
| cg03977831 | 0.741   | 0.505554054 | -0.551608 | 2.57E-05 | hypomethylated |
| cg14491362 | 0.75932 | 0.518001081 | -0.551753 | 3.21E-06 | hypomethylated |
| cg14957186 | 0.26607 | 0.181508108 | -0.551772 | 0.001085 | hypomethylated |
| cg00028135 | 0.60734 | 0.414295676 | -0.551844 | 0.000209 | hypomethylated |
| cg10590925 | 0.56225 | 0.383521081 | -0.551906 | 0.000293 | hypomethylated |
| cg04257163 | 0.62599 | 0.426942162 | -0.552099 | 5.86E-05 | hypomethylated |
| cg19267205 | 0.48725 | 0.332311892 | -0.552124 | 9.49E-05 | hypomethylated |
| cg02331808 | 0.8094  | 0.551956757 | -0.552298 | 2.64E-06 | hypomethylated |
| cg21689902 | 0.71949 | 0.490638378 | -0.552315 | 0.000159 | hypomethylated |
| cg19803952 | 0.42374 | 0.288955676 | -0.552331 | 7.20E-05 | hypomethylated |
| cg01487910 | 0.66502 | 0.453471892 | -0.552385 | 1.58E-05 | hypomethylated |
| cg24996440 | 0.48501 | 0.330715676 | -0.552423 | 0.000155 | hypomethylated |
| cg27227804 | 0.66863 | 0.455888649 | -0.552527 | 7.29E-05 | hypomethylated |
| cg12743031 | 0.65486 | 0.446464865 | -0.55264  | 8.03E-05 | hypomethylated |
| cg10546210 | 0.64514 | 0.439795135 | -0.552781 | 0.000109 | hypomethylated |
| cg05427381 | 0.66718 | 0.454764865 | -0.552955 | 9.95E-05 | hypomethylated |

|            |         |             |           |          |                |
|------------|---------|-------------|-----------|----------|----------------|
| cg02687883 | 0.61762 | 0.420978919 | -0.552971 | 7.12E-06 | hypomethylated |
| cg25507121 | 0.66366 | 0.452321081 | -0.553097 | 3.59E-06 | hypomethylated |
| cg08429815 | 0.85669 | 0.583875135 | -0.553113 | 2.79E-06 | hypomethylated |
| cg24704287 | 0.51755 | 0.352715676 | -0.553193 | 0.00032  | hypomethylated |
| cg23516451 | 0.72264 | 0.492482162 | -0.553206 | 5.45E-05 | hypomethylated |
| cg17244340 | 0.45027 | 0.306855135 | -0.553233 | 0.002231 | hypomethylated |
| cg16708465 | 0.64658 | 0.440635676 | -0.553243 | 0.000506 | hypomethylated |
| cg24768595 | 0.85476 | 0.58242     | -0.553459 | 3.49E-06 | hypomethylated |
| cg24363020 | 0.59342 | 0.404326486 | -0.553533 | 8.32E-05 | hypomethylated |
| cg18114811 | 0.81067 | 0.552345405 | -0.553544 | 3.59E-06 | hypomethylated |
| cg21519654 | 0.79345 | 0.540586486 | -0.553614 | 2.92E-05 | hypomethylated |
| cg19180828 | 0.5521  | 0.376138919 | -0.553664 | 0.00039  | hypomethylated |
| cg02872491 | 0.58706 | 0.399925946 | -0.553775 | 1.15E-05 | hypomethylated |
| cg19368016 | 0.54133 | 0.368765946 | -0.553803 | 0.001734 | hypomethylated |
| cg11534215 | 0.56903 | 0.387627568 | -0.553834 | 5.45E-05 | hypomethylated |
| cg26274662 | 0.31027 | 0.211353514 | -0.553866 | 0.000931 | hypomethylated |
| cg24189696 | 0.41126 | 0.280140541 | -0.5539   | 0.001052 | hypomethylated |
| cg15247093 | 0.90267 | 0.614872973 | -0.55391  | 1.39E-05 | hypomethylated |
| cg12581682 | 0.8662  | 0.590016757 | -0.553944 | 1.12E-05 | hypomethylated |
| cg01221209 | 0.94164 | 0.641385405 | -0.553984 | 2.23E-06 | hypomethylated |
| cg03520938 | 0.8283  | 0.564142162 | -0.554095 | 2.21E-05 | hypomethylated |
| cg26403171 | 0.72475 | 0.493590811 | -0.554168 | 5.51E-05 | hypomethylated |
| cg20998539 | 0.61317 | 0.417587027 | -0.55421  | 0.000528 | hypomethylated |
| cg05895618 | 0.6331  | 0.43107027  | -0.55451  | 0.000129 | hypomethylated |
| cg04508114 | 0.48599 | 0.330874595 | -0.554642 | 0.001496 | hypomethylated |
| cg06427571 | 0.52447 | 0.357063784 | -0.554678 | 0.000445 | hypomethylated |
| cg02749784 | 0.85267 | 0.580496216 | -0.554701 | 9.82E-06 | hypomethylated |
| cg04600000 | 0.61469 | 0.418444324 | -0.554823 | 0.00012  | hypomethylated |
| cg01772439 | 0.80157 | 0.545617297 | -0.554939 | 1.39E-05 | hypomethylated |
| cg08844698 | 0.5589  | 0.380407027 | -0.555046 | 0.000132 | hypomethylated |
| cg11954355 | 0.48249 | 0.328398919 | -0.55505  | 0.000229 | hypomethylated |
| cg08035351 | 0.62321 | 0.424175676 | -0.555056 | 1.54E-06 | hypomethylated |
| cg27105123 | 0.45976 | 0.312907027 | -0.555147 | 8.42E-05 | hypomethylated |
| cg25161912 | 0.57191 | 0.389216757 | -0.555214 | 0.000426 | hypomethylated |
| cg16273051 | 0.64313 | 0.437680541 | -0.555232 | 3.76E-05 | hypomethylated |
| cg15354065 | 0.61082 | 0.415682703 | -0.555265 | 6.62E-05 | hypomethylated |
| cg03648020 | 0.5115  | 0.348071351 | -0.555351 | 0.000613 | hypomethylated |
| cg20140201 | 0.76758 | 0.522275135 | -0.555507 | 9.44E-06 | hypomethylated |
| cg03527077 | 0.75409 | 0.513055135 | -0.555623 | 1.05E-06 | hypomethylated |
| cg05695699 | 0.87524 | 0.59548     | -0.555626 | 5.73E-06 | hypomethylated |
| cg00577202 | 0.35407 | 0.240894054 | -0.555636 | 0.003078 | hypomethylated |
| cg00651016 | 0.85133 | 0.579203243 | -0.555649 | 7.62E-06 | hypomethylated |
| cg22478317 | 0.4339  | 0.295198919 | -0.555675 | 9.95E-05 | hypomethylated |
| cg26631454 | 0.78154 | 0.531684865 | -0.555748 | 1.42E-05 | hypomethylated |
| cg18092351 | 0.9435  | 0.641828108 | -0.555836 | 2.42E-06 | hypomethylated |
| cg07167185 | 0.59213 | 0.402793514 | -0.555873 | 4.73E-06 | hypomethylated |
| cg13237068 | 0.77725 | 0.528680541 | -0.555982 | 2.39E-05 | hypomethylated |
| cg19249749 | 0.90453 | 0.615180541 | -0.556158 | 1.67E-06 | hypomethylated |
| cg07132183 | 0.83269 | 0.566250811 | -0.556338 | 2.05E-06 | hypomethylated |
| cg14205632 | 0.3925  | 0.266908108 | -0.55635  | 6.70E-05 | hypomethylated |
| cg19673376 | 0.79077 | 0.537730811 | -0.556374 | 8.83E-06 | hypomethylated |
| cg10752406 | 0.60301 | 0.41002     | -0.556488 | 0.000551 | hypomethylated |
| cg07678594 | 0.61635 | 0.419055676 | -0.556608 | 8.37E-06 | hypomethylated |
| cg16365424 | 0.73454 | 0.499391892 | -0.556669 | 0.000563 | hypomethylated |
| cg20446824 | 0.55729 | 0.378855135 | -0.556782 | 0.000426 | hypomethylated |
| cg10173586 | 0.52123 | 0.354314054 | -0.556891 | 0.000417 | hypomethylated |
| cg10373607 | 0.79387 | 0.539474595 | -0.557348 | 6.62E-05 | hypomethylated |
| cg10395101 | 0.62504 | 0.42474     | -0.557369 | 0.000517 | hypomethylated |

|            |         |             |           |          |                |
|------------|---------|-------------|-----------|----------|----------------|
| cg15095917 | 0.32449 | 0.220501081 | -0.557388 | 0.000386 | hypomethylated |
| cg15729154 | 0.77039 | 0.523465946 | -0.557493 | 1.33E-05 | hypomethylated |
| cg27505627 | 0.9412  | 0.639483784 | -0.557594 | 1.82E-06 | hypomethylated |
| cg10214581 | 0.50867 | 0.345607027 | -0.557597 | 0.000154 | hypomethylated |
| cg07842521 | 0.60228 | 0.409206486 | -0.557605 | 3.23E-05 | hypomethylated |
| cg07511317 | 0.90032 | 0.611701622 | -0.55761  | 4.24E-06 | hypomethylated |
| cg20366110 | 0.65453 | 0.444675676 | -0.557706 | 0.000674 | hypomethylated |
| cg08134678 | 0.63451 | 0.431068649 | -0.557725 | 0.003843 | hypomethylated |
| cg18050804 | 0.62213 | 0.42259027  | -0.557957 | 0.000313 | hypomethylated |
| cg01749904 | 0.6737  | 0.457604865 | -0.558004 | 1.94E-05 | hypomethylated |
| cg06214007 | 0.59515 | 0.404228649 | -0.558082 | 0.000805 | hypomethylated |
| cg16489259 | 0.41301 | 0.280501081 | -0.55817  | 8.03E-05 | hypomethylated |
| cg06145435 | 0.59453 | 0.403782703 | -0.558171 | 5.31E-05 | hypomethylated |
| cg08607108 | 0.84381 | 0.573080541 | -0.55818  | 4.36E-05 | hypomethylated |
| cg12787571 | 0.77579 | 0.52684     | -0.558301 | 2.07E-05 | hypomethylated |
| cg25002294 | 0.83335 | 0.565896757 | -0.558384 | 3.49E-06 | hypomethylated |
| cg06513470 | 0.82334 | 0.559083784 | -0.558424 | 5.03E-07 | hypomethylated |
| cg10625247 | 0.84548 | 0.574092973 | -0.558486 | 6.05E-06 | hypomethylated |
| cg16405432 | 0.57642 | 0.391395676 | -0.558493 | 0.000132 | hypomethylated |
| cg01116477 | 0.84151 | 0.571363784 | -0.558571 | 8.15E-06 | hypomethylated |
| cg01919768 | 0.64215 | 0.435983784 | -0.558636 | 1.39E-05 | hypomethylated |
| cg24413842 | 0.55257 | 0.375158919 | -0.558655 | 0.001875 | hypomethylated |
| cg04469998 | 0.68086 | 0.462258378 | -0.558659 | 2.57E-06 | hypomethylated |
| cg07319315 | 0.89456 | 0.607302703 | -0.558762 | 9.82E-06 | hypomethylated |
| cg23482746 | 0.73315 | 0.497721081 | -0.558771 | 1.04E-05 | hypomethylated |
| cg25899154 | 0.57736 | 0.391895676 | -0.559002 | 6.31E-05 | hypomethylated |
| cg06565975 | 0.78898 | 0.535505405 | -0.559088 | 0.000145 | hypomethylated |
| cg13984330 | 0.84758 | 0.575269189 | -0.559112 | 9.07E-06 | hypomethylated |
| cg10064922 | 0.84249 | 0.571777838 | -0.559205 | 8.63E-05 | hypomethylated |
| cg08850243 | 0.72709 | 0.493436757 | -0.559269 | 0.000104 | hypomethylated |
| cg10211456 | 0.5529  | 0.375184865 | -0.559417 | 0.000226 | hypomethylated |
| cg26703507 | 0.68116 | 0.462203243 | -0.559466 | 0.000528 | hypomethylated |
| cg10564001 | 0.77285 | 0.524412973 | -0.559485 | 4.05E-05 | hypomethylated |
| cg23091777 | 0.87966 | 0.596877838 | -0.55951  | 7.32E-06 | hypomethylated |
| cg08610982 | 0.40384 | 0.274012973 | -0.55954  | 0.00095  | hypomethylated |
| cg06655216 | 0.59346 | 0.402671892 | -0.559546 | 0.000408 | hypomethylated |
| cg01824603 | 0.77997 | 0.529155135 | -0.559728 | 1.18E-05 | hypomethylated |
| cg24749089 | 0.69459 | 0.47122973  | -0.559731 | 7.84E-05 | hypomethylated |
| cg18882156 | 0.50811 | 0.344716216 | -0.559732 | 0.000142 | hypomethylated |
| cg13725899 | 0.81593 | 0.553518378 | -0.559814 | 6.57E-06 | hypomethylated |
| cg05784862 | 0.70976 | 0.481485405 | -0.559839 | 6.15E-05 | hypomethylated |
| cg02704570 | 0.46813 | 0.317529189 | -0.56002  | 0.00291  | hypomethylated |
| cg23342625 | 0.80943 | 0.54902973  | -0.560022 | 1.52E-05 | hypomethylated |
| cg09633240 | 0.55711 | 0.377876216 | -0.560048 | 0.000138 | hypomethylated |
| cg27461542 | 0.8772  | 0.594970811 | -0.560087 | 2.75E-06 | hypomethylated |
| cg26283879 | 0.41185 | 0.279335676 | -0.560119 | 0.001949 | hypomethylated |
| cg01464703 | 0.67941 | 0.460788649 | -0.560177 | 0.000313 | hypomethylated |
| cg07804749 | 0.57418 | 0.389395676 | -0.560266 | 8.13E-05 | hypomethylated |
| cg19107296 | 0.66062 | 0.448011351 | -0.560285 | 3.23E-05 | hypomethylated |
| cg10122294 | 0.71422 | 0.484357297 | -0.560297 | 0.000182 | hypomethylated |
| cg12924899 | 0.76421 | 0.518242703 | -0.560341 | 1.75E-05 | hypomethylated |
| cg14778437 | 0.7894  | 0.535320541 | -0.560354 | 4.94E-05 | hypomethylated |
| cg27187375 | 0.85369 | 0.578907568 | -0.560379 | 3.04E-06 | hypomethylated |
| cg02733351 | 0.84576 | 0.57349027  | -0.560479 | 3.21E-06 | hypomethylated |
| cg25591451 | 0.51946 | 0.352224865 | -0.560516 | 0.000327 | hypomethylated |
| cg06030535 | 0.81983 | 0.555858378 | -0.560607 | 8.03E-05 | hypomethylated |
| cg25349729 | 0.92522 | 0.627296216 | -0.56065  | 2.13E-06 | hypomethylated |
| cg16777510 | 0.67389 | 0.456891351 | -0.560662 | 0.001949 | hypomethylated |

|            |         |             |           |          |                |
|------------|---------|-------------|-----------|----------|----------------|
| cg09120267 | 0.73613 | 0.499084865 | -0.560675 | 3.59E-06 | hypomethylated |
| cg03653026 | 0.55135 | 0.373794595 | -0.560723 | 0.001875 | hypomethylated |
| cg14424070 | 0.656   | 0.444692432 | -0.560888 | 0.001052 | hypomethylated |
| cg13712023 | 0.65903 | 0.4467      | -0.561038 | 0.00024  | hypomethylated |
| cg22566740 | 0.63696 | 0.431685405 | -0.561222 | 2.57E-05 | hypomethylated |
| cg01775802 | 0.65606 | 0.444612432 | -0.561279 | 0.000209 | hypomethylated |
| cg12011299 | 0.77837 | 0.527492432 | -0.561306 | 8.22E-05 | hypomethylated |
| cg02271139 | 0.72331 | 0.490141622 | -0.561415 | 1.02E-06 | hypomethylated |
| cg09113070 | 0.47845 | 0.324208649 | -0.561446 | 0.001571 | hypomethylated |
| cg13578134 | 0.69966 | 0.474042703 | -0.561637 | 0.001481 | hypomethylated |
| cg16466870 | 0.7297  | 0.494377297 | -0.561691 | 1.41E-06 | hypomethylated |
| cg10805880 | 0.50822 | 0.344311892 | -0.561737 | 0.007799 | hypomethylated |
| cg05514909 | 0.64565 | 0.437399459 | -0.561801 | 6.78E-05 | hypomethylated |
| cg00934987 | 0.40755 | 0.276096216 | -0.561806 | 0.000293 | hypomethylated |
| cg09839874 | 0.84739 | 0.574054595 | -0.561838 | 1.50E-05 | hypomethylated |
| cg03301165 | 0.82833 | 0.561113514 | -0.561913 | 2.21E-05 | hypomethylated |
| cg11370814 | 0.67254 | 0.455577297 | -0.561924 | 0.000399 | hypomethylated |
| cg18278424 | 0.46408 | 0.31435027  | -0.562001 | 4.05E-05 | hypomethylated |
| cg18688062 | 0.54388 | 0.368398919 | -0.56202  | 1.25E-05 | hypomethylated |
| cg15403283 | 0.90828 | 0.61520973  | -0.562059 | 1.12E-05 | hypomethylated |
| cg07215695 | 0.67617 | 0.457957838 | -0.562171 | 2.38E-05 | hypomethylated |
| cg25855001 | 0.78564 | 0.532056757 | -0.562288 | 2.92E-05 | hypomethylated |
| cg19242984 | 0.73581 | 0.498307568 | -0.562297 | 8.63E-05 | hypomethylated |
| cg07090714 | 0.46046 | 0.311805405 | -0.56243  | 0.000365 | hypomethylated |
| cg00232535 | 0.83013 | 0.56206973  | -0.562588 | 8.15E-06 | hypomethylated |
| cg25655096 | 0.50698 | 0.343202703 | -0.562868 | 0.001188 | hypomethylated |
| cg26753302 | 0.78565 | 0.531849189 | -0.56287  | 5.89E-06 | hypomethylated |
| cg09318763 | 0.64632 | 0.437528108 | -0.562873 | 8.84E-05 | hypomethylated |
| cg25332717 | 0.45631 | 0.308884324 | -0.562948 | 8.63E-05 | hypomethylated |
| cg24629380 | 0.92766 | 0.627934595 | -0.562982 | 1.90E-06 | hypomethylated |
| cg19402314 | 0.56078 | 0.379576757 | -0.563043 | 9.07E-06 | hypomethylated |
| cg21204860 | 0.41134 | 0.278423243 | -0.563052 | 0.000123 | hypomethylated |
| cg19272348 | 0.75727 | 0.512572432 | -0.563052 | 2.78E-05 | hypomethylated |
| cg24222580 | 0.57292 | 0.387765405 | -0.56315  | 0.000382 | hypomethylated |
| cg03925642 | 0.71335 | 0.482687027 | -0.563522 | 4.47E-05 | hypomethylated |
| cg00018181 | 0.44292 | 0.299700541 | -0.563524 | 0.000242 | hypomethylated |
| cg19906672 | 0.51775 | 0.350331892 | -0.563533 | 5.19E-05 | hypomethylated |
| cg06048750 | 0.60108 | 0.406704865 | -0.563575 | 0.000772 | hypomethylated |
| cg22700848 | 0.43925 | 0.297205405 | -0.563582 | 0.000129 | hypomethylated |
| cg09508668 | 0.6181  | 0.418185405 | -0.563698 | 0.000262 | hypomethylated |
| cg06136702 | 0.40742 | 0.275630811 | -0.56378  | 5.86E-05 | hypomethylated |
| cg19015997 | 0.66431 | 0.449421081 | -0.563789 | 9.31E-06 | hypomethylated |
| cg02082342 | 0.70452 | 0.476620541 | -0.5638   | 1.50E-05 | hypomethylated |
| cg23623251 | 0.77526 | 0.524420541 | -0.563956 | 1.35E-05 | hypomethylated |
| cg20663219 | 0.75994 | 0.514026486 | -0.564043 | 5.14E-06 | hypomethylated |
| cg16204717 | 0.42667 | 0.288575135 | -0.564174 | 0.000681 | hypomethylated |
| cg17416644 | 0.66736 | 0.451326486 | -0.564294 | 0.000166 | hypomethylated |
| cg11438560 | 0.37135 | 0.251138378 | -0.564297 | 0.00032  | hypomethylated |
| cg20703003 | 0.82395 | 0.557204324 | -0.56435  | 8.37E-06 | hypomethylated |
| cg21063296 | 0.40212 | 0.271924865 | -0.564418 | 3.44E-05 | hypomethylated |
| cg26189213 | 0.74603 | 0.504452973 | -0.564514 | 7.47E-05 | hypomethylated |
| cg11982525 | 0.60691 | 0.410377838 | -0.56453  | 0.00255  | hypomethylated |
| cg00738772 | 0.645   | 0.436112973 | -0.564597 | 0.000112 | hypomethylated |
| cg01037823 | 0.6661  | 0.450364324 | -0.564646 | 4.82E-05 | hypomethylated |
| cg12385643 | 0.8032  | 0.543056757 | -0.564656 | 1.82E-06 | hypomethylated |
| cg04276058 | 0.55082 | 0.372404324 | -0.564711 | 0.001571 | hypomethylated |
| cg16526732 | 0.73695 | 0.498082703 | -0.565181 | 1.48E-05 | hypomethylated |
| cg09350411 | 0.64002 | 0.43256973  | -0.565184 | 0.000417 | hypomethylated |

|            |         |             |           |          |                |
|------------|---------|-------------|-----------|----------|----------------|
| cg13332142 | 0.83236 | 0.562542703 | -0.565245 | 2.32E-05 | hypomethylated |
| cg13443911 | 0.72877 | 0.492527027 | -0.565261 | 0.000135 | hypomethylated |
| cg10904867 | 0.61664 | 0.416723784 | -0.565337 | 1.58E-06 | hypomethylated |
| cg03158310 | 0.62674 | 0.423546486 | -0.565347 | 3.11E-05 | hypomethylated |
| cg01022670 | 0.77127 | 0.521212973 | -0.565363 | 4.05E-05 | hypomethylated |
| cg01015899 | 0.69317 | 0.468355135 | -0.565606 | 0.000126 | hypomethylated |
| cg26494916 | 0.80481 | 0.54378     | -0.565625 | 6.93E-06 | hypomethylated |
| cg15049549 | 0.62024 | 0.419057297 | -0.565679 | 0.000195 | hypomethylated |
| cg13823919 | 0.76171 | 0.514603784 | -0.56578  | 3.04E-06 | hypomethylated |
| cg24897320 | 0.70073 | 0.473394054 | -0.565817 | 6.93E-06 | hypomethylated |
| cg24296478 | 0.2787  | 0.188251892 | -0.566049 | 0.000581 | hypomethylated |
| cg25292309 | 0.68701 | 0.46392     | -0.566455 | 2.15E-05 | hypomethylated |
| cg09924669 | 0.5811  | 0.392394595 | -0.566481 | 0.000148 | hypomethylated |
| cg26178163 | 0.69313 | 0.468018919 | -0.566559 | 0.000274 | hypomethylated |
| cg13058710 | 0.3687  | 0.248954595 | -0.566565 | 8.32E-05 | hypomethylated |
| cg03018256 | 0.73336 | 0.495154595 | -0.566643 | 2.15E-05 | hypomethylated |
| cg03290213 | 0.86894 | 0.586640541 | -0.56678  | 1.70E-06 | hypomethylated |
| cg01174811 | 0.83993 | 0.566984865 | -0.566959 | 1.40E-05 | hypomethylated |
| cg20749059 | 0.48918 | 0.330214054 | -0.566964 | 0.000382 | hypomethylated |
| cg21965980 | 0.66027 | 0.445677297 | -0.567057 | 2.85E-05 | hypomethylated |
| cg26446832 | 0.81927 | 0.552960541 | -0.567162 | 9.57E-06 | hypomethylated |
| cg07177395 | 0.70206 | 0.473810811 | -0.567283 | 0.000575 | hypomethylated |
| cg23866916 | 0.68071 | 0.459366486 | -0.567395 | 3.76E-05 | hypomethylated |
| cg23957643 | 0.78207 | 0.527755676 | -0.567428 | 2.46E-06 | hypomethylated |
| cg17114584 | 0.52343 | 0.353218378 | -0.567436 | 1.77E-06 | hypomethylated |
| cg16009407 | 0.63094 | 0.425738378 | -0.567536 | 0.000741 | hypomethylated |
| cg01569082 | 0.57633 | 0.388888649 | -0.567538 | 3.21E-06 | hypomethylated |
| cg08710564 | 0.75665 | 0.510538919 | -0.567605 | 3.40E-05 | hypomethylated |
| cg13466284 | 0.756   | 0.510097838 | -0.567612 | 8.26E-06 | hypomethylated |
| cg26800893 | 0.49909 | 0.33675027  | -0.567621 | 0.000335 | hypomethylated |
| cg18563987 | 0.74751 | 0.504355676 | -0.567651 | 1.15E-05 | hypomethylated |
| cg05467458 | 0.74578 | 0.503188108 | -0.567652 | 1.40E-05 | hypomethylated |
| cg26210250 | 0.65403 | 0.441253514 | -0.567749 | 0.001    | hypomethylated |
| cg20972199 | 0.53926 | 0.363818919 | -0.56776  | 0.001803 | hypomethylated |
| cg08837215 | 0.75124 | 0.506832973 | -0.567763 | 3.85E-05 | hypomethylated |
| cg12229082 | 0.67503 | 0.455407027 | -0.567795 | 1.93E-06 | hypomethylated |
| cg20220678 | 0.7712  | 0.520251351 | -0.567896 | 3.32E-05 | hypomethylated |
| cg03417788 | 0.91555 | 0.61754973  | -0.568083 | 8.60E-06 | hypomethylated |
| cg20716202 | 0.8043  | 0.542503784 | -0.568101 | 3.90E-06 | hypomethylated |
| cg03304763 | 0.7717  | 0.520498919 | -0.568145 | 8.03E-05 | hypomethylated |
| cg26596719 | 0.65236 | 0.439997838 | -0.568172 | 0.00094  | hypomethylated |
| cg10064525 | 0.62266 | 0.419922703 | -0.568321 | 1.31E-05 | hypomethylated |
| cg24587080 | 0.46879 | 0.316150811 | -0.568329 | 0.000129 | hypomethylated |
| cg23381232 | 0.64109 | 0.432341622 | -0.568355 | 9.95E-05 | hypomethylated |
| cg22969914 | 0.60903 | 0.410716757 | -0.568369 | 0.000756 | hypomethylated |
| cg27388703 | 0.62663 | 0.42258     | -0.568389 | 0.001912 | hypomethylated |
| cg20778199 | 0.4991  | 0.336557297 | -0.568477 | 0.00013  | hypomethylated |
| cg08396863 | 0.25584 | 0.172512973 | -0.568537 | 0.000749 | hypomethylated |
| cg19838087 | 0.44707 | 0.301436757 | -0.568645 | 0.001118 | hypomethylated |
| cg21189909 | 0.43711 | 0.294706486 | -0.568718 | 0.000102 | hypomethylated |
| cg24647820 | 0.64239 | 0.433105946 | -0.568729 | 9.49E-05 | hypomethylated |
| cg09223940 | 0.80864 | 0.545167027 | -0.568799 | 1.84E-05 | hypomethylated |
| cg24199006 | 0.56973 | 0.384060541 | -0.568945 | 0.005411 | hypomethylated |
| cg25546651 | 0.83099 | 0.560155135 | -0.569005 | 4.18E-06 | hypomethylated |
| cg09769113 | 0.94628 | 0.637796216 | -0.569172 | 1.20E-06 | hypomethylated |
| cg05576245 | 0.52196 | 0.351794054 | -0.569208 | 8.52E-05 | hypomethylated |
| cg25908283 | 0.52789 | 0.355785946 | -0.569228 | 4.82E-05 | hypomethylated |
| cg23534216 | 0.66801 | 0.450179459 | -0.569369 | 0.000412 | hypomethylated |



|            |         |             |           |          |                |
|------------|---------|-------------|-----------|----------|----------------|
| cg14976447 | 0.65986 | 0.444684865 | -0.569377 | 0.000789 | hypomethylated |
| cg00974944 | 0.85334 | 0.575020541 | -0.569507 | 1.31E-05 | hypomethylated |
| cg10837404 | 0.90955 | 0.61288     | -0.569548 | 3.21E-06 | hypomethylated |
| cg03651054 | 0.62583 | 0.421678378 | -0.569628 | 3.07E-05 | hypomethylated |
| cg17383842 | 0.50176 | 0.338067568 | -0.569686 | 0.003571 | hypomethylated |
| cg23946364 | 0.74442 | 0.501560541 | -0.569693 | 8.60E-06 | hypomethylated |
| cg23903301 | 0.68899 | 0.464191892 | -0.569762 | 0.000135 | hypomethylated |
| cg21268653 | 0.31065 | 0.209268108 | -0.569938 | 0.0006   | hypomethylated |
| cg02820413 | 0.59361 | 0.399858919 | -0.570024 | 6.22E-06 | hypomethylated |
| cg08580187 | 0.65083 | 0.438377297 | -0.570108 | 0.001803 | hypomethylated |
| cg19028462 | 0.80732 | 0.543754595 | -0.570185 | 4.05E-05 | hypomethylated |
| cg03189821 | 0.78798 | 0.530724324 | -0.570196 | 1.58E-05 | hypomethylated |
| cg26250086 | 0.41641 | 0.28044     | -0.570313 | 7.93E-05 | hypomethylated |
| cg21406967 | 0.38104 | 0.256612973 | -0.570348 | 0.000214 | hypomethylated |
| cg08326468 | 0.69737 | 0.469625946 | -0.570412 | 2.87E-06 | hypomethylated |
| cg13443733 | 0.48186 | 0.324494054 | -0.570422 | 0.004951 | hypomethylated |
| cg09749669 | 0.68024 | 0.458069189 | -0.570478 | 5.45E-05 | hypomethylated |
| cg26752663 | 0.72205 | 0.486215135 | -0.570504 | 7.65E-05 | hypomethylated |
| cg08401725 | 0.5595  | 0.376756757 | -0.570505 | 8.22E-05 | hypomethylated |
| cg02186444 | 0.73374 | 0.494075135 | -0.570538 | 1.04E-05 | hypomethylated |
| cg20475082 | 0.73782 | 0.49679027  | -0.570632 | 0.000195 | hypomethylated |
| cg22937172 | 0.91509 | 0.616147568 | -0.570638 | 1.82E-06 | hypomethylated |
| cg22214889 | 0.63016 | 0.424278919 | -0.570705 | 0.002624 | hypomethylated |
| cg15078284 | 0.33355 | 0.224574054 | -0.570712 | 0.001667 | hypomethylated |
| cg09709457 | 0.73465 | 0.494619459 | -0.570738 | 7.38E-05 | hypomethylated |
| cg07392307 | 0.72326 | 0.486934595 | -0.570786 | 1.09E-06 | hypomethylated |
| cg05155319 | 0.45143 | 0.30388973  | -0.570954 | 3.15E-05 | hypomethylated |
| cg18158670 | 0.83359 | 0.561138919 | -0.57098  | 7.93E-06 | hypomethylated |
| cg24693436 | 0.89788 | 0.60435027  | -0.571138 | 6.20E-07 | hypomethylated |
| cg13758054 | 0.45779 | 0.308107568 | -0.571252 | 0.006915 | hypomethylated |
| cg12491114 | 0.67396 | 0.453589189 | -0.571277 | 0.000142 | hypomethylated |
| cg11060604 | 0.83781 | 0.563855676 | -0.571297 | 7.32E-06 | hypomethylated |
| cg27076536 | 0.81884 | 0.551031892 | -0.571446 | 8.60E-06 | hypomethylated |
| cg10061532 | 0.58124 | 0.391134054 | -0.571471 | 0.000107 | hypomethylated |
| cg02486332 | 0.60256 | 0.405474054 | -0.571495 | 5.65E-06 | hypomethylated |
| cg10075976 | 0.58727 | 0.395179459 | -0.571516 | 0.003441 | hypomethylated |
| cg21531300 | 0.58855 | 0.396027568 | -0.571564 | 0.000857 | hypomethylated |
| cg22001807 | 0.51632 | 0.347374595 | -0.571773 | 0.003378 | hypomethylated |
| cg12413579 | 0.51112 | 0.34384973  | -0.571884 | 0.000112 | hypomethylated |
| cg03661324 | 0.7434  | 0.500086486 | -0.571961 | 0.000174 | hypomethylated |
| cg08227353 | 0.71282 | 0.479452432 | -0.57215  | 0.00013  | hypomethylated |
| cg23828876 | 0.79764 | 0.536492973 | -0.572178 | 0.000232 | hypomethylated |
| cg17322774 | 0.58162 | 0.391190811 | -0.572204 | 2.87E-06 | hypomethylated |
| cg19763108 | 0.64885 | 0.436404865 | -0.572218 | 0.000274 | hypomethylated |
| cg09802186 | 0.79251 | 0.533026486 | -0.572222 | 3.23E-05 | hypomethylated |
| cg06137072 | 0.53854 | 0.362206486 | -0.572241 | 0.000224 | hypomethylated |
| cg24724689 | 0.5211  | 0.350452973 | -0.572339 | 0.000485 | hypomethylated |
| cg19907725 | 0.60361 | 0.405902703 | -0.572483 | 4.94E-05 | hypomethylated |
| cg14340336 | 0.41522 | 0.279188108 | -0.572638 | 0.001423 | hypomethylated |
| cg03175417 | 0.75618 | 0.508435135 | -0.572666 | 3.12E-06 | hypomethylated |
| cg16888565 | 0.75927 | 0.510485405 | -0.572743 | 1.84E-05 | hypomethylated |
| cg05827190 | 0.69696 | 0.46857027  | -0.57281  | 5.86E-05 | hypomethylated |
| cg20477160 | 0.82903 | 0.557270811 | -0.573046 | 6.95E-05 | hypomethylated |
| cg25865120 | 0.63353 | 0.425821081 | -0.573166 | 0.000378 | hypomethylated |
| cg18461347 | 0.62855 | 0.422445405 | -0.573263 | 7.32E-06 | hypomethylated |
| cg03982897 | 0.4936  | 0.331744865 | -0.573268 | 5.86E-05 | hypomethylated |
| cg22052143 | 0.71073 | 0.47763027  | -0.573407 | 0.000517 | hypomethylated |
| cg13443768 | 0.67582 | 0.454165946 | -0.57342  | 2.42E-05 | hypomethylated |

|            |         |             |           |          |                |
|------------|---------|-------------|-----------|----------|----------------|
| cg11755201 | 0.38321 | 0.257516216 | -0.573472 | 0.000303 | hypomethylated |
| cg11029367 | 0.81047 | 0.544597838 | -0.573568 | 1.42E-05 | hypomethylated |
| cg14785527 | 0.64871 | 0.435892973 | -0.5736   | 0.001262 | hypomethylated |
| cg07427475 | 0.67249 | 0.451841622 | -0.573696 | 0.00039  | hypomethylated |
| cg02915920 | 0.62508 | 0.419959459 | -0.573791 | 5.19E-05 | hypomethylated |
| cg17662083 | 0.69851 | 0.469221081 | -0.574013 | 9.31E-06 | hypomethylated |
| cg17656763 | 0.63518 | 0.42667027  | -0.574044 | 0.000132 | hypomethylated |
| cg05355436 | 0.7157  | 0.480744865 | -0.574084 | 0.000127 | hypomethylated |
| cg07168232 | 0.45875 | 0.308101081 | -0.574304 | 0.001314 | hypomethylated |
| cg16442312 | 0.74221 | 0.498458378 | -0.574354 | 7.42E-06 | hypomethylated |
| cg05373251 | 0.76398 | 0.513064865 | -0.574394 | 0.00015  | hypomethylated |
| cg05470166 | 0.484   | 0.325037838 | -0.574399 | 1.62E-05 | hypomethylated |
| cg27143703 | 0.91921 | 0.617292973 | -0.574439 | 2.87E-06 | hypomethylated |
| cg06595154 | 0.55472 | 0.372478378 | -0.574603 | 0.000626 | hypomethylated |
| cg13857678 | 0.61117 | 0.410358378 | -0.574689 | 0.004951 | hypomethylated |
| cg07064544 | 0.92584 | 0.621627568 | -0.574712 | 6.84E-06 | hypomethylated |
| cg03596178 | 0.69631 | 0.467481622 | -0.57482  | 7.22E-06 | hypomethylated |
| cg22449980 | 0.86619 | 0.581527568 | -0.574836 | 3.79E-06 | hypomethylated |
| cg18427091 | 0.48888 | 0.328212432 | -0.57485  | 6.70E-05 | hypomethylated |
| cg05662664 | 0.8115  | 0.544784324 | -0.574906 | 1.42E-05 | hypomethylated |
| cg06121808 | 0.56908 | 0.382021622 | -0.574977 | 0.001314 | hypomethylated |
| cg16100355 | 0.92824 | 0.623078919 | -0.575083 | 5.89E-06 | hypomethylated |
| cg18449021 | 0.51028 | 0.342497838 | -0.575194 | 0.000445 | hypomethylated |
| cg05413061 | 0.82035 | 0.550608649 | -0.575212 | 5.14E-06 | hypomethylated |
| cg19628739 | 0.57613 | 0.386689189 | -0.57522  | 0.000102 | hypomethylated |
| cg13883671 | 0.92403 | 0.620181081 | -0.57525  | 3.79E-06 | hypomethylated |
| cg04423820 | 0.80376 | 0.539396216 | -0.575419 | 1.18E-06 | hypomethylated |
| cg25202503 | 0.8983  | 0.602823784 | -0.575461 | 6.68E-07 | hypomethylated |
| cg09274344 | 0.5225  | 0.350621622 | -0.575516 | 0.000741 | hypomethylated |
| cg20587236 | 0.55919 | 0.37520973  | -0.575641 | 0.000931 | hypomethylated |
| cg04948438 | 0.71894 | 0.482387027 | -0.57568  | 2.10E-05 | hypomethylated |
| cg14794041 | 0.41863 | 0.280875676 | -0.575744 | 8.22E-05 | hypomethylated |
| cg10593028 | 0.7941  | 0.532783784 | -0.575771 | 1.71E-05 | hypomethylated |
| cg11306361 | 0.3171  | 0.212733514 | -0.575891 | 0.000219 | hypomethylated |
| cg15552491 | 0.7084  | 0.475221622 | -0.575964 | 1.80E-05 | hypomethylated |
| cg23939096 | 0.60781 | 0.407654054 | -0.576275 | 0.000313 | hypomethylated |
| cg09644356 | 0.74245 | 0.497949189 | -0.576295 | 3.79E-06 | hypomethylated |
| cg00598204 | 0.79592 | 0.533791351 | -0.576347 | 2.85E-05 | hypomethylated |
| cg26449680 | 0.33719 | 0.226097297 | -0.576618 | 0.000408 | hypomethylated |
| cg15377758 | 0.79395 | 0.532311892 | -0.576776 | 1.99E-06 | hypomethylated |
| cg14270581 | 0.50606 | 0.339261081 | -0.576913 | 0.003316 | hypomethylated |
| cg18002126 | 0.70374 | 0.471674595 | -0.577251 | 0.000287 | hypomethylated |
| cg02473237 | 0.74994 | 0.502631351 | -0.577275 | 1.05E-06 | hypomethylated |
| cg06694040 | 0.47622 | 0.319172432 | -0.577292 | 0.002455 | hypomethylated |
| cg00085790 | 0.78171 | 0.523917838 | -0.577293 | 2.42E-06 | hypomethylated |
| cg03753813 | 0.55291 | 0.37056973  | -0.5773   | 8.63E-05 | hypomethylated |
| cg05212892 | 0.88752 | 0.594777838 | -0.577429 | 4.24E-06 | hypomethylated |
| cg08371852 | 0.77773 | 0.521115676 | -0.577666 | 4.48E-06 | hypomethylated |
| cg04818594 | 0.77992 | 0.522576216 | -0.577685 | 8.13E-05 | hypomethylated |
| cg22417613 | 0.67642 | 0.453224865 | -0.577692 | 0.000234 | hypomethylated |
| cg20430773 | 0.61332 | 0.410907568 | -0.577826 | 0.001481 | hypomethylated |
| cg17702736 | 0.79004 | 0.529284865 | -0.577881 | 4.94E-05 | hypomethylated |
| cg08528486 | 0.86863 | 0.581911351 | -0.577942 | 1.68E-05 | hypomethylated |
| cg15549637 | 0.70762 | 0.474015676 | -0.57804  | 0.000102 | hypomethylated |
| cg11293828 | 0.40592 | 0.271910811 | -0.578062 | 4.94E-05 | hypomethylated |
| cg03301498 | 0.72003 | 0.482319459 | -0.578068 | 5.58E-05 | hypomethylated |
| cg03326606 | 0.83619 | 0.56011027  | -0.57812  | 1.99E-05 | hypomethylated |
| cg10328047 | 0.72559 | 0.485981081 | -0.578254 | 4.01E-06 | hypomethylated |

|            |         |             |           |          |                |
|------------|---------|-------------|-----------|----------|----------------|
| cg07139495 | 0.73156 | 0.489974595 | -0.578269 | 3.90E-06 | hypomethylated |
| cg03139377 | 0.59179 | 0.396351892 | -0.578303 | 0.000145 | hypomethylated |
| cg24391989 | 0.7487  | 0.501425405 | -0.578353 | 2.15E-05 | hypomethylated |
| cg15378486 | 0.48601 | 0.325489189 | -0.578376 | 5.45E-05 | hypomethylated |
| cg06851151 | 0.59253 | 0.396796216 | -0.57849  | 0.000313 | hypomethylated |
| cg12506165 | 0.55493 | 0.371616757 | -0.57849  | 0.000839 | hypomethylated |
| cg01509243 | 0.55984 | 0.374892973 | -0.578536 | 0.002699 | hypomethylated |
| cg19303524 | 0.81478 | 0.545608108 | -0.578545 | 4.36E-05 | hypomethylated |
| cg20446334 | 0.90154 | 0.603670811 | -0.578629 | 3.62E-05 | hypomethylated |
| cg03634833 | 0.71592 | 0.479341622 | -0.578744 | 4.15E-05 | hypomethylated |
| cg07927984 | 0.52679 | 0.352681622 | -0.578862 | 7.47E-05 | hypomethylated |
| cg04342594 | 0.50018 | 0.334864324 | -0.578871 | 0.004445 | hypomethylated |
| cg10371155 | 0.69179 | 0.463076757 | -0.579083 | 0.000374 | hypomethylated |
| cg02590088 | 0.5443  | 0.364347568 | -0.579087 | 8.42E-05 | hypomethylated |
| cg09716613 | 0.53693 | 0.359371892 | -0.579256 | 0.002803 | hypomethylated |
| cg18318006 | 0.7222  | 0.483328108 | -0.579396 | 0.000178 | hypomethylated |
| cg06481431 | 0.48037 | 0.321468108 | -0.57947  | 0.000262 | hypomethylated |
| cg26883251 | 0.37047 | 0.247915135 | -0.57951  | 0.000805 | hypomethylated |
| cg23633330 | 0.39853 | 0.266691892 | -0.579514 | 0.000454 | hypomethylated |
| cg00206063 | 0.87524 | 0.585662703 | -0.579609 | 6.93E-06 | hypomethylated |
| cg05781996 | 0.52319 | 0.350065405 | -0.57971  | 0.000506 | hypomethylated |
| cg03502601 | 0.64607 | 0.432271892 | -0.579751 | 0.000219 | hypomethylated |
| cg20768506 | 0.61109 | 0.408803243 | -0.579978 | 1.15E-05 | hypomethylated |
| cg13639881 | 0.42562 | 0.284726486 | -0.579989 | 0.0003   | hypomethylated |
| cg21127079 | 0.74666 | 0.499454054 | -0.580099 | 0.000495 | hypomethylated |
| cg15903956 | 0.64282 | 0.429991351 | -0.580107 | 0.000159 | hypomethylated |
| cg26763394 | 0.68727 | 0.459723784 | -0.58011  | 3.95E-05 | hypomethylated |
| cg02988698 | 0.36143 | 0.241763784 | -0.580118 | 0.006395 | hypomethylated |
| cg01834856 | 0.60936 | 0.407592973 | -0.580166 | 0.000268 | hypomethylated |
| cg05132999 | 0.76396 | 0.510987027 | -0.58021  | 3.44E-06 | hypomethylated |
| cg01965380 | 0.7047  | 0.471343784 | -0.58023  | 0.000251 | hypomethylated |
| cg10492240 | 0.81848 | 0.547416216 | -0.580309 | 7.20E-07 | hypomethylated |
| cg24088438 | 0.50887 | 0.340337297 | -0.580332 | 0.000725 | hypomethylated |
| cg00838397 | 0.86255 | 0.576876757 | -0.580345 | 9.31E-06 | hypomethylated |
| cg26645709 | 0.56939 | 0.38078     | -0.580459 | 0.000224 | hypomethylated |
| cg08026735 | 0.37377 | 0.249954054 | -0.580488 | 5.72E-05 | hypomethylated |
| cg21330727 | 0.72876 | 0.487341622 | -0.58051  | 2.05E-06 | hypomethylated |
| cg15342087 | 0.56142 | 0.37542     | -0.580575 | 0.000193 | hypomethylated |
| cg00374672 | 0.54062 | 0.361446486 | -0.580833 | 0.00028  | hypomethylated |
| cg16353318 | 0.80427 | 0.53765027  | -0.581012 | 4.60E-06 | hypomethylated |
| cg01733438 | 0.72885 | 0.487221081 | -0.581045 | 0.000166 | hypomethylated |
| cg08564522 | 0.6591  | 0.440576757 | -0.581104 | 2.64E-05 | hypomethylated |
| cg07241909 | 0.51463 | 0.343963784 | -0.581279 | 9.72E-05 | hypomethylated |
| cg00414077 | 0.6902  | 0.461308649 | -0.581282 | 2.79E-06 | hypomethylated |
| cg05277122 | 0.89795 | 0.600089189 | -0.581458 | 2.10E-05 | hypomethylated |
| cg14112601 | 0.59698 | 0.398947027 | -0.581485 | 0.001188 | hypomethylated |
| cg05649391 | 0.91825 | 0.613595676 | -0.581599 | 1.80E-05 | hypomethylated |
| cg23622047 | 0.69677 | 0.465493514 | -0.581921 | 5.51E-05 | hypomethylated |
| cg15044270 | 0.44955 | 0.30032     | -0.581981 | 7.65E-05 | hypomethylated |
| cg04540406 | 0.46617 | 0.311418378 | -0.582002 | 0.001734 | hypomethylated |
| cg17884383 | 0.59215 | 0.395566486 | -0.582042 | 3.21E-06 | hypomethylated |
| cg23191354 | 0.74229 | 0.49578973  | -0.582255 | 3.57E-05 | hypomethylated |
| cg04948649 | 0.73962 | 0.493995135 | -0.582287 | 0.000214 | hypomethylated |
| cg24924502 | 0.82872 | 0.553493514 | -0.582318 | 1.99E-05 | hypomethylated |
| cg11847636 | 0.66473 | 0.443944324 | -0.58239  | 0.00028  | hypomethylated |
| cg16058274 | 0.73422 | 0.490328649 | -0.582463 | 1.62E-05 | hypomethylated |
| cg23400169 | 0.68483 | 0.457337838 | -0.582486 | 7.29E-05 | hypomethylated |
| cg23080427 | 0.45681 | 0.305059459 | -0.582504 | 4.47E-05 | hypomethylated |

|            |         |             |           |          |                |
|------------|---------|-------------|-----------|----------|----------------|
| cg00204512 | 0.53421 | 0.356741081 | -0.58253  | 0.000166 | hypomethylated |
| cg10321973 | 0.39566 | 0.264208649 | -0.582584 | 0.002231 | hypomethylated |
| cg17330303 | 0.90339 | 0.603221081 | -0.582662 | 1.31E-05 | hypomethylated |
| cg03283990 | 0.685   | 0.457385946 | -0.582692 | 5.00E-06 | hypomethylated |
| cg19017142 | 0.63482 | 0.423876757 | -0.582703 | 0.002803 | hypomethylated |
| cg21538684 | 0.70043 | 0.467681081 | -0.582716 | 0.001511 | hypomethylated |
| cg11454459 | 0.71854 | 0.479752432 | -0.582778 | 2.27E-05 | hypomethylated |
| cg27326306 | 0.5505  | 0.367533514 | -0.582867 | 0.000265 | hypomethylated |
| cg12308965 | 0.52994 | 0.353776216 | -0.582992 | 1.77E-06 | hypomethylated |
| cg23030853 | 0.83352 | 0.556437838 | -0.582996 | 5.14E-06 | hypomethylated |
| cg26467269 | 0.82694 | 0.552039459 | -0.583011 | 7.20E-07 | hypomethylated |
| cg21086551 | 0.79452 | 0.530372432 | -0.583078 | 1.50E-05 | hypomethylated |
| cg17596359 | 0.64207 | 0.428575135 | -0.583182 | 4.58E-05 | hypomethylated |
| cg19648552 | 0.75171 | 0.50170973  | -0.583323 | 9.31E-06 | hypomethylated |
| cg18923740 | 0.34481 | 0.230132432 | -0.583337 | 0.002066 | hypomethylated |
| cg18006637 | 0.54712 | 0.365129189 | -0.58345  | 0.002409 | hypomethylated |
| cg16213217 | 0.78296 | 0.522482162 | -0.583557 | 7.56E-05 | hypomethylated |
| cg10275917 | 0.64239 | 0.428631351 | -0.583712 | 2.85E-05 | hypomethylated |
| cg20305489 | 0.76519 | 0.510547027 | -0.583774 | 0.000234 | hypomethylated |
| cg25747670 | 0.67    | 0.446958378 | -0.584021 | 1.04E-05 | hypomethylated |
| cg19497767 | 0.72406 | 0.483008649 | -0.58406  | 6.39E-06 | hypomethylated |
| cg18372930 | 0.44845 | 0.299135676 | -0.584147 | 0.001541 | hypomethylated |
| cg09082823 | 0.79351 | 0.529262162 | -0.584266 | 1.37E-06 | hypomethylated |
| cg18717167 | 0.57789 | 0.385432973 | -0.584315 | 0.000185 | hypomethylated |
| cg04003327 | 0.79223 | 0.52838     | -0.584343 | 1.44E-05 | hypomethylated |
| cg05045027 | 0.47318 | 0.315585946 | -0.584356 | 0.00031  | hypomethylated |
| cg16319142 | 0.86794 | 0.578837838 | -0.584436 | 2.71E-06 | hypomethylated |
| cg19097880 | 0.66469 | 0.443285946 | -0.584444 | 3.40E-05 | hypomethylated |
| cg24084564 | 0.6041  | 0.402847027 | -0.584555 | 1.93E-06 | hypomethylated |
| cg05582690 | 0.84894 | 0.566048649 | -0.584737 | 1.18E-05 | hypomethylated |
| cg26071033 | 0.41955 | 0.279702703 | -0.584949 | 0.00095  | hypomethylated |
| cg01033299 | 0.48236 | 0.321574595 | -0.584957 | 0.000374 | hypomethylated |
| cg03944072 | 0.80431 | 0.536162703 | -0.585081 | 2.16E-06 | hypomethylated |
| cg07915516 | 0.40572 | 0.270452432 | -0.58511  | 3.23E-05 | hypomethylated |
| cg03078767 | 0.86421 | 0.576032973 | -0.585231 | 1.15E-05 | hypomethylated |
| cg21845080 | 0.6984  | 0.465495676 | -0.585286 | 1.11E-05 | hypomethylated |
| cg19445335 | 0.89548 | 0.596792973 | -0.585431 | 9.38E-07 | hypomethylated |
| cg15597364 | 0.59128 | 0.39405027  | -0.585462 | 7.84E-05 | hypomethylated |
| cg17172331 | 0.6648  | 0.443001081 | -0.58561  | 8.42E-05 | hypomethylated |
| cg24643393 | 0.46203 | 0.307848649 | -0.585765 | 0.000148 | hypomethylated |
| cg20468415 | 0.55151 | 0.367462162 | -0.585791 | 0.000161 | hypomethylated |
| cg06586046 | 0.66005 | 0.439723784 | -0.585978 | 6.22E-06 | hypomethylated |
| cg08386009 | 0.54258 | 0.361431351 | -0.586114 | 2.05E-06 | hypomethylated |
| cg20954533 | 0.50655 | 0.337418919 | -0.586164 | 0.002751 | hypomethylated |
| cg16015593 | 0.58735 | 0.391231351 | -0.586198 | 0.000142 | hypomethylated |
| cg23166988 | 0.26693 | 0.177781081 | -0.58636  | 0.000386 | hypomethylated |
| cg10927461 | 0.54589 | 0.363520541 | -0.586573 | 0.000262 | hypomethylated |
| cg15849060 | 0.83036 | 0.552952432 | -0.586582 | 9.31E-06 | hypomethylated |
| cg12951282 | 0.39459 | 0.262723784 | -0.586808 | 0.000417 | hypomethylated |
| cg18776616 | 0.77481 | 0.515831892 | -0.586942 | 8.83E-06 | hypomethylated |
| cg07403899 | 0.57164 | 0.380544324 | -0.587042 | 0.000485 | hypomethylated |
| cg05652225 | 0.58049 | 0.38642973  | -0.587065 | 6.93E-06 | hypomethylated |
| cg14986890 | 0.79313 | 0.52796973  | -0.587102 | 8.03E-05 | hypomethylated |
| cg23534766 | 0.65469 | 0.435803784 | -0.587133 | 1.56E-05 | hypomethylated |
| cg18628646 | 0.73385 | 0.488461081 | -0.587242 | 8.13E-05 | hypomethylated |
| cg10785793 | 0.66723 | 0.444115135 | -0.58725  | 0.001074 | hypomethylated |
| cg03292149 | 0.84428 | 0.56192     | -0.587357 | 5.28E-06 | hypomethylated |
| cg23668195 | 0.57516 | 0.382770811 | -0.587483 | 0.000129 | hypomethylated |

|            |         |             |           |          |                |
|------------|---------|-------------|-----------|----------|----------------|
| cg19255608 | 0.57735 | 0.384185405 | -0.587643 | 4.36E-05 | hypomethylated |
| cg14010805 | 0.28446 | 0.189283784 | -0.587675 | 5.58E-05 | hypomethylated |
| cg09063683 | 0.67613 | 0.449898919 | -0.5877   | 1.09E-05 | hypomethylated |
| cg14113958 | 0.684   | 0.45512     | -0.587749 | 0.000306 | hypomethylated |
| cg00479463 | 0.67058 | 0.446124324 | -0.587964 | 0.00043  | hypomethylated |
| cg04396112 | 0.7408  | 0.492837297 | -0.587973 | 0.000148 | hypomethylated |
| cg26396492 | 0.45571 | 0.303135676 | -0.588152 | 0.00101  | hypomethylated |
| cg01652514 | 0.66049 | 0.439272432 | -0.588421 | 0.000138 | hypomethylated |
| cg17333042 | 0.48788 | 0.324458378 | -0.588493 | 9.95E-05 | hypomethylated |
| cg25466245 | 0.50521 | 0.335955676 | -0.588612 | 0.000107 | hypomethylated |
| cg00211115 | 0.50183 | 0.333642703 | -0.588895 | 0.000306 | hypomethylated |
| cg22878582 | 0.7737  | 0.514389189 | -0.588914 | 5.00E-06 | hypomethylated |
| cg13652008 | 0.64977 | 0.431975676 | -0.588979 | 0.00032  | hypomethylated |
| cg08498833 | 0.69477 | 0.461889189 | -0.588989 | 3.95E-05 | hypomethylated |
| cg21370522 | 0.57992 | 0.385516216 | -0.589062 | 0.010555 | hypomethylated |
| cg02766259 | 0.8988  | 0.597411351 | -0.589275 | 1.12E-05 | hypomethylated |
| cg23407151 | 0.65934 | 0.438206486 | -0.589412 | 1.80E-05 | hypomethylated |
| cg00919591 | 0.5557  | 0.369291351 | -0.589547 | 0.000725 | hypomethylated |
| cg11001085 | 0.85092 | 0.565479459 | -0.589549 | 1.93E-06 | hypomethylated |
| cg16580616 | 0.66077 | 0.439042162 | -0.589789 | 0.000115 | hypomethylated |
| cg15497834 | 0.51066 | 0.339301081 | -0.589797 | 0.001423 | hypomethylated |
| cg20000107 | 0.58036 | 0.385595676 | -0.589859 | 0.000209 | hypomethylated |
| cg11386011 | 0.61221 | 0.406742162 | -0.589912 | 2.57E-05 | hypomethylated |
| cg23270841 | 0.59291 | 0.393891892 | -0.590013 | 8.84E-05 | hypomethylated |
| cg20041612 | 0.74831 | 0.497126486 | -0.590023 | 3.12E-06 | hypomethylated |
| cg01385669 | 0.7851  | 0.521561622 | -0.590039 | 4.07E-06 | hypomethylated |
| cg06709297 | 0.86059 | 0.571672432 | -0.590137 | 2.29E-06 | hypomethylated |
| cg11012153 | 0.78922 | 0.524172973 | -0.590385 | 7.12E-05 | hypomethylated |
| cg02144874 | 0.74571 | 0.495265405 | -0.590413 | 5.72E-05 | hypomethylated |
| cg10097313 | 0.75768 | 0.503214595 | -0.590415 | 2.71E-05 | hypomethylated |
| cg13401301 | 0.44998 | 0.298844865 | -0.590464 | 0.006796 | hypomethylated |
| cg21938894 | 0.66865 | 0.444043243 | -0.590551 | 3.32E-05 | hypomethylated |
| cg10438282 | 0.63431 | 0.421137297 | -0.590897 | 1.37E-06 | hypomethylated |
| cg15029037 | 0.82123 | 0.545218378 | -0.590952 | 1.80E-05 | hypomethylated |
| cg00066270 | 0.61413 | 0.407614595 | -0.591338 | 3.44E-05 | hypomethylated |
| cg23670794 | 0.85234 | 0.565717838 | -0.591346 | 9.82E-06 | hypomethylated |
| cg09262230 | 0.61635 | 0.409078378 | -0.591373 | 3.95E-05 | hypomethylated |
| cg04188920 | 0.72794 | 0.483132432 | -0.591401 | 8.52E-05 | hypomethylated |
| cg14528056 | 0.85303 | 0.566139459 | -0.591439 | 2.57E-05 | hypomethylated |
| cg26579550 | 0.62735 | 0.416318919 | -0.591581 | 0.00028  | hypomethylated |
| cg20237595 | 0.53992 | 0.358262703 | -0.591728 | 0.005508 | hypomethylated |
| cg13461178 | 0.47846 | 0.317466486 | -0.591794 | 0.00048  | hypomethylated |
| cg17650028 | 0.70417 | 0.46722     | -0.591822 | 5.43E-06 | hypomethylated |
| cg03125765 | 0.44783 | 0.297136216 | -0.591827 | 0.000262 | hypomethylated |
| cg01604946 | 0.5762  | 0.382238378 | -0.592097 | 2.27E-05 | hypomethylated |
| cg20991420 | 0.62843 | 0.416883243 | -0.592109 | 0.000232 | hypomethylated |
| cg18325192 | 0.6653  | 0.441321622 | -0.592175 | 5.45E-05 | hypomethylated |
| cg04647835 | 0.79413 | 0.526710811 | -0.592364 | 6.66E-06 | hypomethylated |
| cg04064032 | 0.89246 | 0.591923243 | -0.592377 | 3.08E-06 | hypomethylated |
| cg04212846 | 0.67465 | 0.447410811 | -0.592539 | 3.76E-05 | hypomethylated |
| cg07199862 | 0.73315 | 0.486176757 | -0.592627 | 6.05E-06 | hypomethylated |
| cg12885484 | 0.82731 | 0.548617297 | -0.592628 | 3.85E-05 | hypomethylated |
| cg25769469 | 0.78195 | 0.51853027  | -0.592648 | 0.000374 | hypomethylated |
| cg07697770 | 0.6171  | 0.409204865 | -0.592681 | 2.07E-05 | hypomethylated |
| cg26000536 | 0.80136 | 0.531384324 | -0.592695 | 1.15E-06 | hypomethylated |
| cg17213154 | 0.54719 | 0.362802703 | -0.592857 | 2.51E-05 | hypomethylated |
| cg27608102 | 0.60212 | 0.399207027 | -0.592914 | 3.23E-05 | hypomethylated |
| cg27022827 | 0.67136 | 0.445082703 | -0.593013 | 1.01E-05 | hypomethylated |

|            |         |             |           |          |                |
|------------|---------|-------------|-----------|----------|----------------|
| cg23338993 | 0.72099 | 0.477984324 | -0.593016 | 9.96E-06 | hypomethylated |
| cg14029912 | 0.65823 | 0.436302703 | -0.593262 | 3.53E-05 | hypomethylated |
| cg09291474 | 0.71467 | 0.473711351 | -0.593269 | 1.58E-06 | hypomethylated |
| cg23689428 | 0.56911 | 0.377220541 | -0.593299 | 0.00097  | hypomethylated |
| cg14066757 | 0.39175 | 0.259656216 | -0.593331 | 5.38E-05 | hypomethylated |
| cg05129081 | 0.49798 | 0.330059459 | -0.593362 | 2.92E-05 | hypomethylated |
| cg13226232 | 0.86196 | 0.571265946 | -0.593458 | 1.04E-05 | hypomethylated |
| cg05004855 | 0.3575  | 0.236922162 | -0.59353  | 0.000306 | hypomethylated |
| cg07424400 | 0.72799 | 0.482436216 | -0.59358  | 1.93E-06 | hypomethylated |
| cg08140114 | 0.54935 | 0.364042703 | -0.593618 | 4.58E-05 | hypomethylated |
| cg06468454 | 0.41399 | 0.274325405 | -0.593708 | 0.000274 | hypomethylated |
| cg22412747 | 0.60698 | 0.402186486 | -0.593784 | 7.84E-05 | hypomethylated |
| cg15688324 | 0.81221 | 0.538162162 | -0.593812 | 9.82E-06 | hypomethylated |
| cg06495586 | 0.69515 | 0.460571892 | -0.593898 | 0.000142 | hypomethylated |
| cg14837598 | 0.65657 | 0.434964324 | -0.594052 | 2.51E-05 | hypomethylated |
| cg23386895 | 0.66037 | 0.437446486 | -0.594168 | 0.000123 | hypomethylated |
| cg11888982 | 0.77959 | 0.516359459 | -0.59434  | 0.00035  | hypomethylated |
| cg26165286 | 0.55582 | 0.368143243 | -0.594351 | 0.000588 | hypomethylated |
| cg11095099 | 0.7264  | 0.481115135 | -0.594382 | 1.88E-06 | hypomethylated |
| cg08854834 | 0.49683 | 0.329060541 | -0.594399 | 0.000204 | hypomethylated |
| cg05673966 | 0.71516 | 0.473635676 | -0.594488 | 7.12E-06 | hypomethylated |
| cg10104290 | 0.44748 | 0.29634     | -0.59457  | 0.000474 | hypomethylated |
| cg09551613 | 0.28993 | 0.192001081 | -0.59459  | 0.001096 | hypomethylated |
| cg00025357 | 0.35211 | 0.233175135 | -0.594612 | 0.00151  | hypomethylated |
| cg13120756 | 0.77364 | 0.512305405 | -0.594658 | 1.29E-06 | hypomethylated |
| cg00221794 | 0.62048 | 0.410812973 | -0.594903 | 0.002274 | hypomethylated |
| cg17079034 | 0.39644 | 0.262476216 | -0.594916 | 0.000449 | hypomethylated |
| cg09247695 | 0.51695 | 0.342254054 | -0.594957 | 0.000551 | hypomethylated |
| cg23581088 | 0.62839 | 0.416012973 | -0.595032 | 3.15E-05 | hypomethylated |
| cg27002325 | 0.88891 | 0.588477838 | -0.595049 | 3.79E-06 | hypomethylated |
| cg10334750 | 0.81373 | 0.538662162 | -0.595169 | 6.62E-05 | hypomethylated |
| cg06627532 | 0.63452 | 0.419944865 | -0.595466 | 2.81E-05 | hypomethylated |
| cg10954944 | 0.68576 | 0.453827027 | -0.595561 | 6.22E-06 | hypomethylated |
| cg14030904 | 0.64991 | 0.430042703 | -0.59576  | 0.000342 | hypomethylated |
| cg21402096 | 0.73826 | 0.488449189 | -0.59592  | 2.15E-05 | hypomethylated |
| cg19051042 | 0.77506 | 0.51278     | -0.595968 | 6.93E-06 | hypomethylated |
| cg08418670 | 0.80511 | 0.532579459 | -0.596189 | 4.94E-05 | hypomethylated |
| cg20152088 | 0.58107 | 0.384365946 | -0.596231 | 2.42E-06 | hypomethylated |
| cg03211098 | 0.49219 | 0.32557027  | -0.596246 | 6.38E-05 | hypomethylated |
| cg20427318 | 0.80618 | 0.533261622 | -0.596258 | 4.36E-05 | hypomethylated |
| cg24896460 | 0.75945 | 0.502345946 | -0.596274 | 8.83E-06 | hypomethylated |
| cg14787880 | 0.71359 | 0.472001622 | -0.596304 | 3.85E-05 | hypomethylated |
| cg10601624 | 0.49997 | 0.330692973 | -0.596349 | 3.23E-05 | hypomethylated |
| cg16966139 | 0.43775 | 0.289458919 | -0.596749 | 2.32E-05 | hypomethylated |
| cg04881228 | 0.37407 | 0.247348649 | -0.596762 | 4.82E-05 | hypomethylated |
| cg25463742 | 0.7555  | 0.49955027  | -0.596802 | 0.000123 | hypomethylated |
| cg05407338 | 0.55349 | 0.365965946 | -0.596848 | 0.00024  | hypomethylated |
| cg01311222 | 0.73868 | 0.488363243 | -0.596995 | 9.05E-05 | hypomethylated |
| cg01662869 | 0.59434 | 0.392935676 | -0.596995 | 8.42E-05 | hypomethylated |
| cg22688802 | 0.88243 | 0.583390811 | -0.597019 | 9.31E-06 | hypomethylated |
| cg05492904 | 0.72062 | 0.476400541 | -0.597064 | 6.22E-06 | hypomethylated |
| cg09010707 | 0.47565 | 0.314442162 | -0.597106 | 0.000408 | hypomethylated |
| cg19727499 | 0.66723 | 0.441077297 | -0.597153 | 4.82E-05 | hypomethylated |
| cg13023014 | 0.56833 | 0.375696757 | -0.59716  | 1.92E-05 | hypomethylated |
| cg24107163 | 0.58731 | 0.388218378 | -0.597254 | 0.001395 | hypomethylated |
| cg13015534 | 0.68401 | 0.452101081 | -0.597372 | 0.000187 | hypomethylated |
| cg17272838 | 0.73958 | 0.488810811 | -0.59743  | 5.89E-06 | hypomethylated |
| cg02047661 | 0.62126 | 0.410581622 | -0.597528 | 5.43E-06 | hypomethylated |

|            |         |             |           |          |                |
|------------|---------|-------------|-----------|----------|----------------|
| cg00305071 | 0.42306 | 0.279574054 | -0.597632 | 0.000797 | hypomethylated |
| cg24031764 | 0.76972 | 0.508594054 | -0.597819 | 1.84E-05 | hypomethylated |
| cg09093656 | 0.62138 | 0.410576216 | -0.597826 | 0.000756 | hypomethylated |
| cg12403162 | 0.5697  | 0.376423243 | -0.597847 | 0.00134  | hypomethylated |
| cg04864538 | 0.70198 | 0.463798378 | -0.597932 | 9.44E-06 | hypomethylated |
| cg06458557 | 0.63991 | 0.422738919 | -0.598102 | 5.86E-05 | hypomethylated |
| cg01963702 | 0.90413 | 0.597267027 | -0.598154 | 1.67E-06 | hypomethylated |
| cg14454094 | 0.87429 | 0.577543784 | -0.598182 | 1.43E-06 | hypomethylated |
| cg07010146 | 0.77439 | 0.51150973  | -0.598299 | 1.93E-06 | hypomethylated |
| cg04540882 | 0.67158 | 0.443571892 | -0.598391 | 8.15E-06 | hypomethylated |
| cg20651995 | 0.45306 | 0.299206486 | -0.598561 | 8.63E-05 | hypomethylated |
| cg16564525 | 0.39193 | 0.258835135 | -0.598563 | 3.59E-06 | hypomethylated |
| cg20893936 | 0.71634 | 0.473073514 | -0.59858  | 0.000116 | hypomethylated |
| cg26130669 | 0.80922 | 0.534365405 | -0.598705 | 2.32E-05 | hypomethylated |
| cg27027375 | 0.74332 | 0.490832973 | -0.598751 | 1.25E-05 | hypomethylated |
| cg11385938 | 0.85151 | 0.562258919 | -0.598789 | 4.94E-05 | hypomethylated |
| cg15835664 | 0.81861 | 0.540525946 | -0.598812 | 6.05E-06 | hypomethylated |
| cg22208536 | 0.36473 | 0.240828108 | -0.598825 | 4.82E-05 | hypomethylated |
| cg22270364 | 0.74434 | 0.491479459 | -0.598831 | 1.99E-05 | hypomethylated |
| cg06805925 | 0.56808 | 0.375094054 | -0.598842 | 0.000256 | hypomethylated |
| cg00092383 | 0.93551 | 0.617597838 | -0.599085 | 6.57E-06 | hypomethylated |
| cg14905634 | 0.71725 | 0.473470811 | -0.599201 | 0.000159 | hypomethylated |
| cg13687274 | 0.87899 | 0.580231351 | -0.599219 | 2.49E-06 | hypomethylated |
| cg02660643 | 0.66409 | 0.438334054 | -0.599348 | 4.15E-05 | hypomethylated |
| cg24429533 | 0.56809 | 0.374967568 | -0.599354 | 1.12E-06 | hypomethylated |
| cg26856289 | 0.73341 | 0.484074595 | -0.599391 | 0.000741 | hypomethylated |
| cg25936381 | 0.833   | 0.549754054 | -0.59953  | 2.95E-06 | hypomethylated |
| cg08500112 | 0.62523 | 0.412595676 | -0.599658 | 0.001526 | hypomethylated |
| cg18400079 | 0.79663 | 0.525645405 | -0.59982  | 0.000104 | hypomethylated |
| cg01621390 | 0.6688  | 0.441295135 | -0.599831 | 1.89E-05 | hypomethylated |
| cg18452973 | 0.49347 | 0.325597838 | -0.599871 | 9.05E-05 | hypomethylated |
| cg06748147 | 0.29165 | 0.192430811 | -0.599898 | 0.001118 | hypomethylated |
| cg05462761 | 0.47092 | 0.310686486 | -0.600023 | 0.003286 | hypomethylated |
| cg23010507 | 0.69781 | 0.46036973  | -0.600041 | 0.000187 | hypomethylated |
| cg14140379 | 0.78681 | 0.519063784 | -0.600103 | 1.40E-05 | hypomethylated |
| cg11737941 | 0.54801 | 0.361379459 | -0.600688 | 0.001619 | hypomethylated |
| cg25626472 | 0.74996 | 0.494552973 | -0.600689 | 1.46E-05 | hypomethylated |
| cg20077028 | 0.71265 | 0.469929189 | -0.60075  | 0.000191 | hypomethylated |
| cg02010852 | 0.56797 | 0.374505405 | -0.600828 | 0.000129 | hypomethylated |
| cg14332120 | 0.72468 | 0.477812432 | -0.6009   | 1.12E-05 | hypomethylated |
| cg20000220 | 0.9127  | 0.60172     | -0.601048 | 2.42E-06 | hypomethylated |
| cg18376773 | 0.61772 | 0.407192432 | -0.601242 | 9.95E-05 | hypomethylated |
| cg19301114 | 0.49289 | 0.324904865 | -0.601248 | 0.001288 | hypomethylated |
| cg21560697 | 0.84106 | 0.554365946 | -0.60137  | 9.31E-06 | hypomethylated |
| cg04793096 | 0.63772 | 0.420315135 | -0.601452 | 0.000435 | hypomethylated |
| cg15128679 | 0.58812 | 0.387617297 | -0.601478 | 0.000159 | hypomethylated |
| cg09893465 | 0.80713 | 0.531932973 | -0.601557 | 0.000733 | hypomethylated |
| cg00039489 | 0.62992 | 0.415114595 | -0.601659 | 0.000166 | hypomethylated |
| cg16587838 | 0.33178 | 0.218632973 | -0.601716 | 0.000749 | hypomethylated |
| cg19627034 | 0.48068 | 0.316739459 | -0.60178  | 0.003441 | hypomethylated |
| cg13146484 | 0.38614 | 0.254407568 | -0.601982 | 4.10E-05 | hypomethylated |
| cg13362546 | 0.66332 | 0.437012432 | -0.602031 | 6.57E-06 | hypomethylated |
| cg12554573 | 0.71437 | 0.47064     | -0.602048 | 2.10E-06 | hypomethylated |
| cg26673980 | 0.59487 | 0.391905946 | -0.602067 | 0.000138 | hypomethylated |
| cg26489497 | 0.48961 | 0.322518919 | -0.602249 | 8.13E-05 | hypomethylated |
| cg20025658 | 0.73764 | 0.485772432 | -0.602636 | 0.000204 | hypomethylated |
| cg15580052 | 0.78876 | 0.519436757 | -0.602638 | 2.15E-05 | hypomethylated |
| cg24686551 | 0.74513 | 0.490674054 | -0.602727 | 0.000369 | hypomethylated |

|            |         |             |           |          |                |
|------------|---------|-------------|-----------|----------|----------------|
| cg16608498 | 0.59079 | 0.389031351 | -0.602759 | 0.000875 | hypomethylated |
| cg08642285 | 0.56005 | 0.368776757 | -0.602808 | 0.000148 | hypomethylated |
| cg13747967 | 0.62012 | 0.408311351 | -0.602878 | 0.001839 | hypomethylated |
| cg12281620 | 0.65436 | 0.430838378 | -0.602938 | 1.18E-05 | hypomethylated |
| cg08994082 | 0.79814 | 0.525501081 | -0.602948 | 1.15E-05 | hypomethylated |
| cg06873343 | 0.77425 | 0.509745405 | -0.603023 | 0.00017  | hypomethylated |
| cg16421411 | 0.90793 | 0.597688108 | -0.603188 | 2.83E-06 | hypomethylated |
| cg11378101 | 0.77384 | 0.509404324 | -0.603224 | 1.04E-05 | hypomethylated |
| cg13393327 | 0.76212 | 0.501642162 | -0.60336  | 2.78E-05 | hypomethylated |
| cg07469815 | 0.75986 | 0.500137838 | -0.603408 | 2.85E-05 | hypomethylated |
| cg18808929 | 0.57308 | 0.377192973 | -0.603434 | 0.000517 | hypomethylated |
| cg11531272 | 0.56783 | 0.373728108 | -0.60347  | 0.001768 | hypomethylated |
| cg19286437 | 0.66586 | 0.438223243 | -0.603553 | 1.37E-05 | hypomethylated |
| cg27601906 | 0.67751 | 0.445872432 | -0.603611 | 3.57E-05 | hypomethylated |
| cg11957248 | 0.63474 | 0.417714595 | -0.603648 | 8.26E-06 | hypomethylated |
| cg27583815 | 0.81443 | 0.535909189 | -0.603802 | 4.88E-07 | hypomethylated |
| cg10649130 | 0.77567 | 0.510367027 | -0.603908 | 3.76E-05 | hypomethylated |
| cg15135286 | 0.61735 | 0.406184865 | -0.603952 | 0.000142 | hypomethylated |
| cg02591564 | 0.86212 | 0.567172432 | -0.604101 | 1.87E-05 | hypomethylated |
| cg07235218 | 0.44272 | 0.291229189 | -0.60424  | 0.001541 | hypomethylated |
| cg18170229 | 0.50358 | 0.331237297 | -0.604356 | 0.000122 | hypomethylated |
| cg01281040 | 0.91575 | 0.602338919 | -0.604378 | 3.21E-06 | hypomethylated |
| cg00517261 | 0.43864 | 0.288496216 | -0.604485 | 0.000214 | hypomethylated |
| cg24296761 | 0.77353 | 0.508654595 | -0.604771 | 1.75E-05 | hypomethylated |
| cg05256179 | 0.79565 | 0.523170811 | -0.604852 | 5.03E-07 | hypomethylated |
| cg14398113 | 0.57646 | 0.379037838 | -0.604879 | 0.004691 | hypomethylated |
| cg23898497 | 0.49155 | 0.323194595 | -0.604935 | 0.00017  | hypomethylated |
| cg09678939 | 0.6613  | 0.4348      | -0.604953 | 0.000875 | hypomethylated |
| cg21734707 | 0.31329 | 0.205984324 | -0.604964 | 0.001452 | hypomethylated |
| cg26737223 | 0.71203 | 0.468131892 | -0.605023 | 0.000109 | hypomethylated |
| cg14753094 | 0.85174 | 0.559918378 | -0.605197 | 8.83E-06 | hypomethylated |
| cg21721681 | 0.48259 | 0.317245405 | -0.605199 | 0.000464 | hypomethylated |
| cg16429927 | 0.29901 | 0.196555135 | -0.60526  | 3.00E-05 | hypomethylated |
| cg09171112 | 0.69473 | 0.456682162 | -0.605262 | 8.42E-05 | hypomethylated |
| cg02566391 | 0.66283 | 0.435707027 | -0.605281 | 0.000435 | hypomethylated |
| cg20738274 | 0.64195 | 0.421974595 | -0.605305 | 6.84E-06 | hypomethylated |
| cg07999953 | 0.8312  | 0.546272973 | -0.605574 | 3.90E-06 | hypomethylated |
| cg16450097 | 0.81334 | 0.534503784 | -0.605658 | 4.26E-05 | hypomethylated |
| cg25749254 | 0.63596 | 0.417901081 | -0.605775 | 7.47E-05 | hypomethylated |
| cg10009968 | 0.9451  | 0.621017297 | -0.605834 | 3.54E-06 | hypomethylated |
| cg07528209 | 0.78928 | 0.518601622 | -0.60591  | 1.71E-05 | hypomethylated |
| cg23807924 | 0.65359 | 0.429428649 | -0.605967 | 9.05E-05 | hypomethylated |
| cg16609966 | 0.69797 | 0.458583784 | -0.60598  | 1.80E-05 | hypomethylated |
| cg21605781 | 0.44224 | 0.290561622 | -0.605985 | 4.47E-05 | hypomethylated |
| cg10310616 | 0.79668 | 0.523430811 | -0.606002 | 1.06E-05 | hypomethylated |
| cg15172966 | 0.50313 | 0.330547027 | -0.606076 | 0.000417 | hypomethylated |
| cg26298737 | 0.57092 | 0.375082703 | -0.60608  | 0.000557 | hypomethylated |
| cg06827256 | 0.80087 | 0.526154054 | -0.606083 | 1.01E-05 | hypomethylated |
| cg00275828 | 0.63235 | 0.415427568 | -0.606126 | 0.000293 | hypomethylated |
| cg09939948 | 0.26509 | 0.174113514 | -0.606454 | 0.000209 | hypomethylated |
| cg09406107 | 0.3323  | 0.218232973 | -0.606617 | 0.000831 | hypomethylated |
| cg07451762 | 0.57702 | 0.378942162 | -0.606644 | 0.00012  | hypomethylated |
| cg01455178 | 0.76314 | 0.501105946 | -0.606832 | 3.79E-06 | hypomethylated |
| cg18787437 | 0.58177 | 0.381941081 | -0.607099 | 0.000408 | hypomethylated |
| cg21450381 | 0.76756 | 0.503843784 | -0.607303 | 1.54E-05 | hypomethylated |
| cg16773067 | 0.53025 | 0.348056757 | -0.60735  | 6.46E-05 | hypomethylated |
| cg02893550 | 0.55767 | 0.36605027  | -0.60737  | 0.000134 | hypomethylated |
| cg23258611 | 0.59246 | 0.388881081 | -0.607389 | 0.000135 | hypomethylated |



|            |         |             |           |          |                |
|------------|---------|-------------|-----------|----------|----------------|
| cg00220225 | 0.70782 | 0.464596757 | -0.607403 | 4.82E-05 | hypomethylated |
| cg03652336 | 0.63796 | 0.418732973 | -0.607435 | 0.005911 | hypomethylated |
| cg19319037 | 0.68744 | 0.451168649 | -0.607567 | 0.003773 | hypomethylated |
| cg12068124 | 0.41111 | 0.269798919 | -0.60764  | 0.007799 | hypomethylated |
| cg20170271 | 0.53257 | 0.349503243 | -0.607665 | 0.00099  | hypomethylated |
| cg11938718 | 0.66943 | 0.439300541 | -0.607725 | 2.64E-05 | hypomethylated |
| cg06186245 | 0.55872 | 0.366633514 | -0.607787 | 0.000195 | hypomethylated |
| cg18497238 | 0.48371 | 0.317374054 | -0.607958 | 0.000607 | hypomethylated |
| cg19049754 | 0.76996 | 0.505114595 | -0.608173 | 4.15E-05 | hypomethylated |
| cg13050357 | 0.76884 | 0.504299459 | -0.608403 | 2.79E-06 | hypomethylated |
| cg20292636 | 0.55105 | 0.361431892 | -0.608459 | 2.71E-05 | hypomethylated |
| cg06521827 | 0.55388 | 0.363281622 | -0.608485 | 7.47E-05 | hypomethylated |
| cg10188797 | 0.67337 | 0.44165027  | -0.608495 | 2.15E-05 | hypomethylated |
| cg12865818 | 0.78113 | 0.512315135 | -0.608531 | 8.34E-07 | hypomethylated |
| cg16978398 | 0.84375 | 0.55336973  | -0.608572 | 3.04E-06 | hypomethylated |
| cg03978041 | 0.89415 | 0.586396757 | -0.60864  | 1.18E-06 | hypomethylated |
| cg06513247 | 0.34229 | 0.224475676 | -0.60866  | 0.000517 | hypomethylated |
| cg00886780 | 0.41637 | 0.273026486 | -0.608825 | 8.84E-05 | hypomethylated |
| cg00974523 | 0.63377 | 0.415542162 | -0.608965 | 2.13E-05 | hypomethylated |
| cg12358050 | 0.53204 | 0.348818378 | -0.609059 | 7.32E-06 | hypomethylated |
| cg23976431 | 0.3973  | 0.26046     | -0.609167 | 0.000214 | hypomethylated |
| cg04363470 | 0.61214 | 0.401285946 | -0.609231 | 1.18E-05 | hypomethylated |
| cg25025992 | 0.71756 | 0.470337838 | -0.609402 | 3.72E-07 | hypomethylated |
| cg12711760 | 0.3101  | 0.203247568 | -0.609495 | 4.47E-05 | hypomethylated |
| cg01617071 | 0.66769 | 0.437588108 | -0.609605 | 4.94E-05 | hypomethylated |
| cg02238461 | 0.49871 | 0.326821622 | -0.609698 | 0.002938 | hypomethylated |
| cg04819580 | 0.42185 | 0.276438919 | -0.609769 | 0.000129 | hypomethylated |
| cg17319198 | 0.68078 | 0.446105405 | -0.609804 | 1.31E-05 | hypomethylated |
| cg00134295 | 0.59087 | 0.387184865 | -0.609818 | 0.007035 | hypomethylated |
| cg26457700 | 0.78106 | 0.511811351 | -0.609821 | 4.01E-06 | hypomethylated |
| cg04362790 | 0.90617 | 0.593773514 | -0.609869 | 4.82E-05 | hypomethylated |
| cg25772221 | 0.48839 | 0.320018919 | -0.609876 | 0.003705 | hypomethylated |
| cg19377250 | 0.77115 | 0.505287027 | -0.609908 | 7.93E-06 | hypomethylated |
| cg03958308 | 0.56531 | 0.370400541 | -0.609956 | 1.84E-05 | hypomethylated |
| cg13445177 | 0.69372 | 0.454533514 | -0.609967 | 3.49E-05 | hypomethylated |
| cg15250073 | 0.48538 | 0.317984324 | -0.610159 | 0.0006   | hypomethylated |
| cg21547763 | 0.8354  | 0.547258919 | -0.610244 | 1.72E-06 | hypomethylated |
| cg03654169 | 0.70009 | 0.458592973 | -0.610326 | 3.79E-06 | hypomethylated |
| cg20127859 | 0.59818 | 0.39181027  | -0.610424 | 5.58E-05 | hypomethylated |
| cg10854819 | 0.7254  | 0.475137297 | -0.610432 | 0.000313 | hypomethylated |
| cg19654743 | 0.49021 | 0.321068649 | -0.610518 | 2.21E-05 | hypomethylated |
| cg15899738 | 0.86471 | 0.566295676 | -0.610661 | 1.21E-05 | hypomethylated |
| cg11542165 | 0.88039 | 0.576521081 | -0.610769 | 7.32E-06 | hypomethylated |
| cg14757107 | 0.82108 | 0.537663243 | -0.61082  | 3.59E-06 | hypomethylated |
| cg22202381 | 0.76621 | 0.50166973  | -0.611002 | 2.45E-05 | hypomethylated |
| cg13488011 | 0.7325  | 0.479572432 | -0.61108  | 6.62E-05 | hypomethylated |
| cg12441694 | 0.73439 | 0.480797297 | -0.611118 | 3.59E-06 | hypomethylated |
| cg26474043 | 0.54771 | 0.358541622 | -0.611272 | 0.000154 | hypomethylated |
| cg23664708 | 0.41617 | 0.272354595 | -0.611687 | 0.00028  | hypomethylated |
| cg02532341 | 0.52186 | 0.341521081 | -0.611688 | 0.003021 | hypomethylated |
| cg19238349 | 0.48492 | 0.317340541 | -0.611715 | 8.22E-05 | hypomethylated |
| cg16650073 | 0.70719 | 0.462737297 | -0.611904 | 3.15E-05 | hypomethylated |
| cg06799735 | 0.67665 | 0.442683784 | -0.612133 | 2.10E-05 | hypomethylated |
| cg22198603 | 0.67922 | 0.444354595 | -0.612168 | 7.47E-05 | hypomethylated |
| cg14241894 | 0.84512 | 0.55286     | -0.612242 | 5.58E-05 | hypomethylated |
| cg07774251 | 0.73861 | 0.483172973 | -0.612273 | 4.70E-05 | hypomethylated |
| cg01703780 | 0.7171  | 0.469038919 | -0.612467 | 7.42E-06 | hypomethylated |
| cg14966613 | 0.82978 | 0.542732432 | -0.612488 | 2.16E-06 | hypomethylated |

|            |         |             |           |          |                |
|------------|---------|-------------|-----------|----------|----------------|
| cg18270378 | 0.83682 | 0.547275676 | -0.61265  | 1.66E-05 | hypomethylated |
| cg00101629 | 0.62603 | 0.409395676 | -0.612736 | 0.000313 | hypomethylated |
| cg27051318 | 0.68637 | 0.448853514 | -0.612742 | 0.000342 | hypomethylated |
| cg14396214 | 0.46319 | 0.302877838 | -0.612868 | 0.0003   | hypomethylated |
| cg03499675 | 0.6539  | 0.427566486 | -0.612921 | 9.82E-06 | hypomethylated |
| cg23068558 | 0.84272 | 0.550950811 | -0.61313  | 0.00017  | hypomethylated |
| cg03585053 | 0.73152 | 0.478235135 | -0.613177 | 4.12E-06 | hypomethylated |
| cg10472651 | 0.65427 | 0.427705405 | -0.613269 | 0.00018  | hypomethylated |
| cg26283496 | 0.77685 | 0.507804865 | -0.613362 | 0.000107 | hypomethylated |
| cg12011522 | 0.53956 | 0.352635676 | -0.613605 | 5.06E-05 | hypomethylated |
| cg24788090 | 0.76579 | 0.500454595 | -0.61371  | 1.52E-05 | hypomethylated |
| cg02579140 | 0.9104  | 0.594899459 | -0.613855 | 5.19E-05 | hypomethylated |
| cg17552357 | 0.86907 | 0.567869189 | -0.613914 | 1.39E-05 | hypomethylated |
| cg17333973 | 0.39643 | 0.258995676 | -0.614138 | 0.000445 | hypomethylated |
| cg19473623 | 0.74927 | 0.489511351 | -0.614143 | 2.27E-05 | hypomethylated |
| cg26826183 | 0.68951 | 0.450467027 | -0.61415  | 5.28E-06 | hypomethylated |
| cg19640821 | 0.6677  | 0.436203784 | -0.614198 | 0.000613 | hypomethylated |
| cg05416223 | 0.75692 | 0.494400541 | -0.614461 | 5.43E-06 | hypomethylated |
| cg23249922 | 0.65994 | 0.431037297 | -0.614522 | 0.000374 | hypomethylated |
| cg16387532 | 0.50819 | 0.331922162 | -0.614523 | 0.001603 | hypomethylated |
| cg16497293 | 0.76803 | 0.501596757 | -0.614635 | 5.07E-06 | hypomethylated |
| cg19132462 | 0.63217 | 0.412818378 | -0.614805 | 0.000187 | hypomethylated |
| cg10022788 | 0.59211 | 0.386641622 | -0.614868 | 0.00028  | hypomethylated |
| cg21642988 | 0.80193 | 0.523585405 | -0.615051 | 5.43E-06 | hypomethylated |
| cg14825555 | 0.57752 | 0.377022162 | -0.615222 | 2.32E-05 | hypomethylated |
| cg27661394 | 0.78585 | 0.513022162 | -0.615233 | 1.50E-05 | hypomethylated |
| cg26651303 | 0.67398 | 0.439982162 | -0.615261 | 0.000474 | hypomethylated |
| cg13269555 | 0.66969 | 0.437140541 | -0.615396 | 6.70E-05 | hypomethylated |
| cg24968629 | 0.93814 | 0.612346486 | -0.615455 | 9.07E-06 | hypomethylated |
| cg00478421 | 0.50254 | 0.328018378 | -0.615462 | 1.44E-05 | hypomethylated |
| cg18729298 | 0.52912 | 0.345324324 | -0.615643 | 0.001327 | hypomethylated |
| cg11790673 | 0.46236 | 0.301745405 | -0.615685 | 8.60E-06 | hypomethylated |
| cg07306253 | 0.66737 | 0.435384324 | -0.616197 | 7.12E-05 | hypomethylated |
| cg06762457 | 0.51374 | 0.335134595 | -0.616298 | 4.70E-05 | hypomethylated |
| cg04555780 | 0.81508 | 0.531707027 | -0.61631  | 8.71E-06 | hypomethylated |
| cg11639815 | 0.7573  | 0.494001622 | -0.616349 | 0.00044  | hypomethylated |
| cg17756105 | 0.67987 | 0.443461622 | -0.61645  | 1.66E-05 | hypomethylated |
| cg09633081 | 0.46901 | 0.30592     | -0.616464 | 3.32E-05 | hypomethylated |
| cg03226203 | 0.681   | 0.444096757 | -0.616781 | 2.05E-06 | hypomethylated |
| cg06738887 | 0.4937  | 0.321938378 | -0.61685  | 0.000681 | hypomethylated |
| cg05762671 | 0.67499 | 0.440099459 | -0.617037 | 9.05E-05 | hypomethylated |
| cg20947259 | 0.77953 | 0.508255135 | -0.617052 | 2.13E-05 | hypomethylated |
| cg23051926 | 0.59157 | 0.385699459 | -0.617072 | 3.76E-05 | hypomethylated |
| cg02196805 | 0.72797 | 0.47463027  | -0.617075 | 1.41E-06 | hypomethylated |
| cg18773597 | 0.6677  | 0.435320541 | -0.617122 | 0.001912 | hypomethylated |
| cg10620680 | 0.6319  | 0.411945405 | -0.617243 | 6.31E-05 | hypomethylated |
| cg20413202 | 0.83281 | 0.542723784 | -0.617769 | 3.07E-05 | hypomethylated |
| cg15326755 | 0.96926 | 0.631604324 | -0.617863 | 2.42E-06 | hypomethylated |
| cg11963006 | 0.52884 | 0.344600541 | -0.617906 | 0.0006   | hypomethylated |
| cg27499185 | 0.41684 | 0.271609189 | -0.617961 | 9.49E-05 | hypomethylated |
| cg09477895 | 0.7138  | 0.465075135 | -0.618056 | 2.57E-05 | hypomethylated |
| cg07615493 | 0.75177 | 0.489765946 | -0.618199 | 3.49E-05 | hypomethylated |
| cg17115419 | 0.81316 | 0.529718378 | -0.618314 | 3.00E-05 | hypomethylated |
| cg27523087 | 0.50632 | 0.329817297 | -0.618382 | 0.000495 | hypomethylated |
| cg24143287 | 0.87005 | 0.566696757 | -0.618521 | 1.39E-06 | hypomethylated |
| cg00339913 | 0.54997 | 0.358209189 | -0.618551 | 6.78E-05 | hypomethylated |
| cg02987249 | 0.71642 | 0.466607027 | -0.618598 | 6.84E-06 | hypomethylated |
| cg22104744 | 0.4906  | 0.319513514 | -0.61867  | 0.000569 | hypomethylated |

|            |         |             |           |          |                |
|------------|---------|-------------|-----------|----------|----------------|
| cg24527751 | 0.85536 | 0.557068108 | -0.618678 | 7.12E-06 | hypomethylated |
| cg14439774 | 0.63296 | 0.412180541 | -0.618838 | 2.15E-05 | hypomethylated |
| cg05372727 | 0.85583 | 0.557276757 | -0.61893  | 2.16E-06 | hypomethylated |
| cg10714639 | 0.54977 | 0.357969189 | -0.618993 | 0.002455 | hypomethylated |
| cg03109660 | 0.73284 | 0.477144865 | -0.619071 | 0.0002   | hypomethylated |
| cg15694987 | 0.67293 | 0.43810973  | -0.619164 | 1.42E-05 | hypomethylated |
| cg24587185 | 0.46319 | 0.301537297 | -0.619268 | 0.000875 | hypomethylated |
| cg01284289 | 0.57462 | 0.373981622 | -0.619641 | 0.000511 | hypomethylated |
| cg05220092 | 0.44826 | 0.291731351 | -0.619695 | 0.001511 | hypomethylated |
| cg14659814 | 0.73385 | 0.477544324 | -0.619851 | 8.83E-06 | hypomethylated |
| cg22054191 | 0.39918 | 0.259742703 | -0.619956 | 0.002066 | hypomethylated |
| cg14165142 | 0.69675 | 0.453321081 | -0.620108 | 0.000145 | hypomethylated |
| cg23792934 | 0.4291  | 0.279127568 | -0.620389 | 1.06E-05 | hypomethylated |
| cg01099024 | 0.64212 | 0.417685946 | -0.620424 | 5.58E-06 | hypomethylated |
| cg11818555 | 0.88671 | 0.576729189 | -0.620568 | 2.71E-06 | hypomethylated |
| cg25205321 | 0.59688 | 0.388201622 | -0.620635 | 9.72E-05 | hypomethylated |
| cg11668419 | 0.69939 | 0.454872432 | -0.620635 | 4.48E-06 | hypomethylated |
| cg23889010 | 0.54667 | 0.35550973  | -0.620781 | 0.000342 | hypomethylated |
| cg22453826 | 0.85887 | 0.558467568 | -0.620966 | 2.32E-05 | hypomethylated |
| cg06815976 | 0.39528 | 0.257       | -0.621107 | 0.000417 | hypomethylated |
| cg03661110 | 0.68691 | 0.446573514 | -0.621223 | 0.000152 | hypomethylated |
| cg00537837 | 0.76143 | 0.495005946 | -0.621266 | 2.45E-05 | hypomethylated |
| cg11597902 | 0.77026 | 0.500745946 | -0.621267 | 0.000245 | hypomethylated |
| cg10450692 | 0.54121 | 0.351836757 | -0.621282 | 0.00096  | hypomethylated |
| cg23645885 | 0.30508 | 0.19832     | -0.621357 | 0.00255  | hypomethylated |
| cg24809011 | 0.68062 | 0.442438919 | -0.621371 | 1.06E-05 | hypomethylated |
| cg08302480 | 0.60721 | 0.394697297 | -0.621449 | 0.000528 | hypomethylated |
| cg10777887 | 0.54039 | 0.35124973  | -0.621504 | 0.037559 | hypomethylated |
| cg17560015 | 0.55544 | 0.361019459 | -0.621554 | 0.002993 | hypomethylated |
| cg17128799 | 0.71258 | 0.463127568 | -0.621642 | 6.01E-05 | hypomethylated |
| cg22434923 | 0.54277 | 0.352756757 | -0.621667 | 0.001511 | hypomethylated |
| cg05979170 | 0.77712 | 0.505022162 | -0.621791 | 1.31E-05 | hypomethylated |
| cg17245726 | 0.80355 | 0.522126486 | -0.621988 | 3.95E-05 | hypomethylated |
| cg04618171 | 0.87518 | 0.568647027 | -0.622046 | 4.86E-06 | hypomethylated |
| cg14148156 | 0.77293 | 0.502192432 | -0.622097 | 9.44E-06 | hypomethylated |
| cg08422793 | 0.53085 | 0.344902162 | -0.622117 | 0.00623  | hypomethylated |
| cg23518541 | 0.56294 | 0.365741622 | -0.622156 | 0.0002   | hypomethylated |
| cg17150651 | 0.4833  | 0.313965405 | -0.622313 | 0.002026 | hypomethylated |
| cg20697025 | 0.62786 | 0.407864865 | -0.622352 | 0.002803 | hypomethylated |
| cg08380391 | 0.6222  | 0.404171892 | -0.622409 | 2.87E-06 | hypomethylated |
| cg02947498 | 0.77115 | 0.500862162 | -0.622598 | 3.79E-06 | hypomethylated |
| cg23667602 | 0.63974 | 0.41547027  | -0.62274  | 2.21E-05 | hypomethylated |
| cg00674220 | 0.74039 | 0.480815135 | -0.622803 | 2.81E-05 | hypomethylated |
| cg22734236 | 0.51417 | 0.333901081 | -0.622825 | 0.000374 | hypomethylated |
| cg25982657 | 0.50971 | 0.330972973 | -0.622963 | 0.000382 | hypomethylated |
| cg26712743 | 0.69181 | 0.449215676 | -0.622968 | 1.84E-05 | hypomethylated |
| cg14533523 | 0.71665 | 0.46534     | -0.622983 | 4.82E-05 | hypomethylated |
| cg16704703 | 0.55593 | 0.360979459 | -0.622986 | 0.000374 | hypomethylated |
| cg15816503 | 0.6275  | 0.407429189 | -0.623066 | 8.63E-05 | hypomethylated |
| cg14643264 | 0.70765 | 0.459450811 | -0.623126 | 0.000132 | hypomethylated |
| cg02185007 | 0.66955 | 0.434661081 | -0.623301 | 0.000147 | hypomethylated |
| cg06547285 | 0.67364 | 0.437267568 | -0.623461 | 5.79E-05 | hypomethylated |
| cg11911769 | 0.77045 | 0.500077838 | -0.623549 | 1.42E-05 | hypomethylated |
| cg02713162 | 0.79601 | 0.516623784 | -0.623672 | 0.000129 | hypomethylated |
| cg13389508 | 0.56158 | 0.364425405 | -0.623868 | 1.94E-05 | hypomethylated |
| cg10279922 | 0.66446 | 0.431175676 | -0.623907 | 4.31E-05 | hypomethylated |
| cg12184624 | 0.76648 | 0.497221622 | -0.624359 | 8.83E-06 | hypomethylated |
| cg01692279 | 0.38109 | 0.247170811 | -0.624623 | 0.002965 | hypomethylated |

|            |         |             |           |          |                |
|------------|---------|-------------|-----------|----------|----------------|
| cg27596415 | 0.43878 | 0.284539459 | -0.624869 | 0.005223 | hypomethylated |
| cg09723635 | 0.81804 | 0.530438919 | -0.624985 | 9.82E-06 | hypomethylated |
| cg26719625 | 0.71562 | 0.463955676 | -0.625207 | 4.64E-05 | hypomethylated |
| cg00019654 | 0.64612 | 0.418872432 | -0.625291 | 0.000229 | hypomethylated |
| cg21814178 | 0.51656 | 0.334872973 | -0.625322 | 0.002189 | hypomethylated |
| cg19106968 | 0.78404 | 0.508222703 | -0.625466 | 1.80E-05 | hypomethylated |
| cg05360714 | 0.60058 | 0.389301081 | -0.62547  | 0.000163 | hypomethylated |
| cg14918359 | 0.65843 | 0.42676973  | -0.625572 | 6.62E-05 | hypomethylated |
| cg24492058 | 0.40975 | 0.265582162 | -0.625586 | 0.000449 | hypomethylated |
| cg07745671 | 0.79579 | 0.515757297 | -0.625695 | 0.000207 | hypomethylated |
| cg00305740 | 0.78142 | 0.506437838 | -0.625713 | 6.01E-05 | hypomethylated |
| cg21175685 | 0.71043 | 0.460338919 | -0.625996 | 1.17E-05 | hypomethylated |
| cg27290215 | 0.48473 | 0.314071892 | -0.626087 | 4.47E-05 | hypomethylated |
| cg02372702 | 0.43319 | 0.280660541 | -0.626174 | 0.000797 | hypomethylated |
| cg05761882 | 0.46532 | 0.301474595 | -0.626187 | 4.94E-05 | hypomethylated |
| cg01194336 | 0.72691 | 0.470863243 | -0.626469 | 1.71E-05 | hypomethylated |
| cg00086488 | 0.82705 | 0.535725405 | -0.626481 | 6.57E-06 | hypomethylated |
| cg11902863 | 0.50636 | 0.327989189 | -0.626515 | 0.000931 | hypomethylated |
| cg13134297 | 0.68875 | 0.446102162 | -0.626606 | 0.00054  | hypomethylated |
| cg02152631 | 0.61559 | 0.398693514 | -0.62669  | 9.72E-05 | hypomethylated |
| cg20636248 | 0.70617 | 0.45730973  | -0.626844 | 8.84E-05 | hypomethylated |
| cg16339434 | 0.55249 | 0.357687027 | -0.627251 | 0.001262 | hypomethylated |
| cg21579399 | 0.59394 | 0.384505946 | -0.627311 | 0.001839 | hypomethylated |
| cg15269394 | 0.61218 | 0.396301622 | -0.627357 | 0.00032  | hypomethylated |
| cg16558770 | 0.72169 | 0.467193514 | -0.627359 | 0.00017  | hypomethylated |
| cg01607932 | 0.80259 | 0.519519459 | -0.627485 | 2.85E-05 | hypomethylated |
| cg03611487 | 0.49269 | 0.318861081 | -0.627752 | 0.000575 | hypomethylated |
| cg13773247 | 0.65751 | 0.42548     | -0.627922 | 0.00012  | hypomethylated |
| cg17619020 | 0.41422 | 0.268035135 | -0.627975 | 0.000741 | hypomethylated |
| cg20450123 | 0.51211 | 0.331347568 | -0.628108 | 0.003021 | hypomethylated |
| cg17278453 | 0.32978 | 0.213364865 | -0.628181 | 0.002803 | hypomethylated |
| cg07103618 | 0.58053 | 0.375581622 | -0.628244 | 7.47E-05 | hypomethylated |
| cg23043143 | 0.39611 | 0.256258919 | -0.628299 | 0.0003   | hypomethylated |
| cg09502149 | 0.53096 | 0.343497838 | -0.628302 | 5.06E-05 | hypomethylated |
| cg21766667 | 0.48357 | 0.31280973  | -0.628439 | 1.46E-05 | hypomethylated |
| cg17220055 | 0.55499 | 0.358965946 | -0.628615 | 0.000195 | hypomethylated |
| cg10143731 | 0.73919 | 0.478104865 | -0.628618 | 4.80E-06 | hypomethylated |
| cg03727673 | 0.62462 | 0.403996216 | -0.628637 | 1.25E-05 | hypomethylated |
| cg23950233 | 0.59876 | 0.387263243 | -0.628663 | 0.004287 | hypomethylated |
| cg15626405 | 0.55681 | 0.360107027 | -0.628759 | 1.04E-05 | hypomethylated |
| cg02394249 | 0.68473 | 0.442761081 | -0.629007 | 1.80E-05 | hypomethylated |
| cg09232358 | 0.7201  | 0.46563027  | -0.629012 | 3.40E-05 | hypomethylated |
| cg11586448 | 0.39855 | 0.257708649 | -0.62902  | 0.000575 | hypomethylated |
| cg05646575 | 0.73978 | 0.478205405 | -0.629466 | 9.57E-06 | hypomethylated |
| cg02698806 | 0.42864 | 0.277071351 | -0.629509 | 0.009713 | hypomethylated |
| cg11130630 | 0.68732 | 0.444204324 | -0.629759 | 0.000857 | hypomethylated |
| cg04379703 | 0.56116 | 0.362622703 | -0.629943 | 0.000454 | hypomethylated |
| cg21323106 | 0.83511 | 0.539591892 | -0.630098 | 3.59E-06 | hypomethylated |
| cg01189072 | 0.87435 | 0.564891351 | -0.630237 | 6.46E-05 | hypomethylated |
| cg07243202 | 0.60608 | 0.391545405 | -0.630329 | 6.54E-05 | hypomethylated |
| cg05113410 | 0.70438 | 0.455031351 | -0.630388 | 2.27E-05 | hypomethylated |
| cg22816294 | 0.35933 | 0.232111892 | -0.630489 | 0.000138 | hypomethylated |
| cg25711558 | 0.73389 | 0.474045405 | -0.630539 | 4.82E-05 | hypomethylated |
| cg03979241 | 0.74773 | 0.482982703 | -0.630546 | 0.000132 | hypomethylated |
| cg17419597 | 0.35914 | 0.231963784 | -0.630647 | 0.000138 | hypomethylated |
| cg20388732 | 0.55973 | 0.361456216 | -0.63091  | 0.009877 | hypomethylated |
| cg07372824 | 0.31055 | 0.200450811 | -0.631577 | 0.000132 | hypomethylated |
| cg22401939 | 0.39391 | 0.254232432 | -0.631718 | 0.001395 | hypomethylated |

|            |         |             |           |          |                |
|------------|---------|-------------|-----------|----------|----------------|
| cg16041798 | 0.72708 | 0.469238919 | -0.631791 | 0.000109 | hypomethylated |
| cg07016556 | 0.53615 | 0.345992973 | -0.631894 | 0.000435 | hypomethylated |
| cg01999701 | 0.38181 | 0.246387027 | -0.631929 | 1.58E-05 | hypomethylated |
| cg27305460 | 0.52625 | 0.339568649 | -0.632045 | 0.000129 | hypomethylated |
| cg04892643 | 0.64055 | 0.413321081 | -0.632048 | 0.000224 | hypomethylated |
| cg08141959 | 0.86347 | 0.55716     | -0.632054 | 7.12E-06 | hypomethylated |
| cg16326421 | 0.77022 | 0.496982162 | -0.632077 | 1.17E-05 | hypomethylated |
| cg25738326 | 0.49602 | 0.320048108 | -0.63211  | 0.001803 | hypomethylated |
| cg08380379 | 0.8511  | 0.549145405 | -0.63214  | 5.89E-06 | hypomethylated |
| cg15755348 | 0.73603 | 0.474874595 | -0.632218 | 4.70E-05 | hypomethylated |
| cg02709321 | 0.4394  | 0.28348     | -0.632288 | 0.001949 | hypomethylated |
| cg25164589 | 0.71572 | 0.461711351 | -0.632404 | 6.95E-05 | hypomethylated |
| cg11696165 | 0.52125 | 0.336256216 | -0.632415 | 0.000287 | hypomethylated |
| cg03349134 | 0.68732 | 0.443331892 | -0.632595 | 0.000741 | hypomethylated |
| cg27172175 | 0.59677 | 0.384897297 | -0.632701 | 7.12E-05 | hypomethylated |
| cg16171484 | 0.67482 | 0.435216216 | -0.63277  | 1.01E-05 | hypomethylated |
| cg20358011 | 0.47213 | 0.304455135 | -0.632955 | 0.001481 | hypomethylated |
| cg22829164 | 0.62854 | 0.405245405 | -0.633209 | 5.45E-05 | hypomethylated |
| cg06000878 | 0.56746 | 0.365842703 | -0.633295 | 0.00095  | hypomethylated |
| cg25340711 | 0.9239  | 0.595630811 | -0.633318 | 5.81E-06 | hypomethylated |
| cg16426764 | 0.53687 | 0.346067568 | -0.633519 | 5.45E-05 | hypomethylated |
| cg09244071 | 0.73965 | 0.476771351 | -0.633545 | 1.89E-05 | hypomethylated |
| cg10225951 | 0.79197 | 0.510464865 | -0.633634 | 6.31E-05 | hypomethylated |
| cg17958516 | 0.65767 | 0.423868649 | -0.633747 | 7.12E-06 | hypomethylated |
| cg15514918 | 0.83313 | 0.536844865 | -0.634036 | 5.28E-06 | hypomethylated |
| cg26717066 | 0.87856 | 0.566082703 | -0.634128 | 2.36E-06 | hypomethylated |
| cg14695751 | 0.50575 | 0.325856757 | -0.634187 | 0.000327 | hypomethylated |
| cg27085869 | 0.30339 | 0.195442703 | -0.634428 | 0.000214 | hypomethylated |
| cg03072665 | 0.53868 | 0.347013514 | -0.634437 | 1.31E-05 | hypomethylated |
| cg26279261 | 0.44125 | 0.284244324 | -0.634465 | 0.002274 | hypomethylated |
| cg05363955 | 0.76057 | 0.489924865 | -0.634521 | 5.72E-05 | hypomethylated |
| cg14483244 | 0.46419 | 0.298996216 | -0.634588 | 0.007933 | hypomethylated |
| cg18477949 | 0.54378 | 0.350254054 | -0.634621 | 1.33E-06 | hypomethylated |
| cg02355558 | 0.61168 | 0.393897297 | -0.634958 | 3.62E-05 | hypomethylated |
| cg16247269 | 0.55905 | 0.359955676 | -0.635158 | 1.15E-05 | hypomethylated |
| cg23007325 | 0.74391 | 0.478857297 | -0.635532 | 1.18E-05 | hypomethylated |
| cg10410146 | 0.75184 | 0.483932432 | -0.63562  | 1.05E-06 | hypomethylated |
| cg15393702 | 0.61922 | 0.398510811 | -0.635833 | 0.000157 | hypomethylated |
| cg17568962 | 0.42191 | 0.271525946 | -0.635845 | 0.00015  | hypomethylated |
| cg24624505 | 0.6618  | 0.425905946 | -0.63586  | 0.000174 | hypomethylated |
| cg15224459 | 0.64933 | 0.417855676 | -0.635947 | 0.002318 | hypomethylated |
| cg22743884 | 0.83425 | 0.536834054 | -0.636004 | 9.82E-06 | hypomethylated |
| cg04070188 | 0.77019 | 0.495597297 | -0.636046 | 1.01E-05 | hypomethylated |
| cg27436118 | 0.71274 | 0.458600541 | -0.636138 | 0.000104 | hypomethylated |
| cg23005797 | 0.89621 | 0.576625405 | -0.636202 | 3.59E-06 | hypomethylated |
| cg12671632 | 0.47064 | 0.302735135 | -0.636568 | 0.000399 | hypomethylated |
| cg20701183 | 0.73651 | 0.473607568 | -0.637013 | 9.38E-05 | hypomethylated |
| cg14026238 | 0.73062 | 0.469805405 | -0.637058 | 2.95E-06 | hypomethylated |
| cg00852846 | 0.3554  | 0.228528108 | -0.637072 | 0.002883 | hypomethylated |
| cg11048797 | 0.88698 | 0.570332432 | -0.637098 | 3.49E-06 | hypomethylated |
| cg00891886 | 0.35614 | 0.228958378 | -0.637359 | 0.000306 | hypomethylated |
| cg04910082 | 0.84297 | 0.541878919 | -0.637511 | 1.58E-06 | hypomethylated |
| cg03787603 | 0.90129 | 0.57934     | -0.637581 | 2.75E-06 | hypomethylated |
| cg03957109 | 0.80465 | 0.517211351 | -0.637607 | 6.54E-05 | hypomethylated |
| cg05574870 | 0.76431 | 0.491277838 | -0.637619 | 2.39E-05 | hypomethylated |
| cg21519787 | 0.70818 | 0.455176216 | -0.637691 | 2.71E-05 | hypomethylated |
| cg01017395 | 0.4928  | 0.316742162 | -0.637693 | 0.002274 | hypomethylated |
| cg26476820 | 0.72159 | 0.463759459 | -0.637803 | 2.57E-05 | hypomethylated |

|            |         |             |           |          |                |
|------------|---------|-------------|-----------|----------|----------------|
| cg17643598 | 0.41995 | 0.269887027 | -0.637862 | 0.007601 | hypomethylated |
| cg06942111 | 0.71402 | 0.458827027 | -0.638014 | 2.89E-05 | hypomethylated |
| cg16296417 | 0.73765 | 0.473999459 | -0.638051 | 3.07E-05 | hypomethylated |
| cg20709530 | 0.56444 | 0.362688649 | -0.638089 | 0.000857 | hypomethylated |
| cg04019522 | 0.50345 | 0.323454054 | -0.638288 | 4.94E-05 | hypomethylated |
| cg13610455 | 0.6615  | 0.424938378 | -0.638488 | 4.05E-05 | hypomethylated |
| cg26426690 | 0.66714 | 0.42850973  | -0.638662 | 0.000459 | hypomethylated |
| cg02925248 | 0.71448 | 0.458908108 | -0.638688 | 2.95E-06 | hypomethylated |
| cg22492271 | 0.75817 | 0.486913514 | -0.638856 | 6.22E-06 | hypomethylated |
| cg22223119 | 0.6435  | 0.413264324 | -0.638875 | 0.00028  | hypomethylated |
| cg01872593 | 0.47239 | 0.303372432 | -0.638888 | 0.00099  | hypomethylated |
| cg20208009 | 0.44132 | 0.283363243 | -0.639172 | 0.000399 | hypomethylated |
| cg07546943 | 0.69176 | 0.444158378 | -0.639197 | 7.12E-05 | hypomethylated |
| cg24207068 | 0.55295 | 0.355013514 | -0.639275 | 0.000772 | hypomethylated |
| cg11807280 | 0.61538 | 0.395068649 | -0.639374 | 2.38E-05 | hypomethylated |
| cg20899781 | 0.61498 | 0.39473027  | -0.639672 | 0.000187 | hypomethylated |
| cg08136020 | 0.64516 | 0.414034595 | -0.639906 | 0.005223 | hypomethylated |
| cg07303577 | 0.87925 | 0.564259459 | -0.639915 | 8.83E-06 | hypomethylated |
| cg01870834 | 0.55198 | 0.354204324 | -0.640034 | 0.006068 | hypomethylated |
| cg22184944 | 0.63816 | 0.409465405 | -0.640177 | 1.71E-05 | hypomethylated |
| cg12972064 | 0.49719 | 0.31896     | -0.640422 | 0.000822 | hypomethylated |
| cg07442907 | 0.49943 | 0.320360541 | -0.640586 | 0.006564 | hypomethylated |
| cg11583392 | 0.52461 | 0.336463243 | -0.640796 | 1.71E-05 | hypomethylated |
| cg01084566 | 0.59235 | 0.379895135 | -0.640849 | 0.000581 | hypomethylated |
| cg27312979 | 0.62312 | 0.399623784 | -0.640868 | 0.000138 | hypomethylated |
| cg05261596 | 0.36415 | 0.233531351 | -0.640917 | 1.56E-05 | hypomethylated |
| cg06398236 | 0.5572  | 0.357329189 | -0.640941 | 0.000327 | hypomethylated |
| cg00912277 | 0.85844 | 0.550488649 | -0.641004 | 1.29E-06 | hypomethylated |
| cg04100337 | 0.63966 | 0.410165405 | -0.641099 | 3.85E-05 | hypomethylated |
| cg19695507 | 0.73455 | 0.470991351 | -0.64116  | 0.000256 | hypomethylated |
| cg00645755 | 0.62308 | 0.399456757 | -0.641378 | 6.01E-05 | hypomethylated |
| cg23361127 | 0.69393 | 0.444831351 | -0.641532 | 0.000534 | hypomethylated |
| cg09522147 | 0.54563 | 0.349724865 | -0.641703 | 0.000148 | hypomethylated |
| cg04898939 | 0.45309 | 0.290396216 | -0.641775 | 4.26E-05 | hypomethylated |
| cg16978268 | 0.57596 | 0.369125946 | -0.641855 | 9.95E-05 | hypomethylated |
| cg24169486 | 0.73754 | 0.472676216 | -0.641869 | 1.21E-05 | hypomethylated |
| cg07533239 | 0.43395 | 0.278106486 | -0.641891 | 0.000155 | hypomethylated |
| cg08800893 | 0.47116 | 0.301944865 | -0.641932 | 0.004951 | hypomethylated |
| cg22672067 | 0.59176 | 0.379215135 | -0.641996 | 0.000106 | hypomethylated |
| cg09316347 | 0.56402 | 0.361433514 | -0.642016 | 0.000251 | hypomethylated |
| cg21544219 | 0.60952 | 0.390532973 | -0.642229 | 8.63E-05 | hypomethylated |
| cg07405121 | 0.57225 | 0.366651351 | -0.642237 | 0.0003   | hypomethylated |
| cg26504110 | 0.56058 | 0.359163243 | -0.642281 | 0.000214 | hypomethylated |
| cg22786472 | 0.827   | 0.529802703 | -0.642432 | 4.26E-05 | hypomethylated |
| cg14646653 | 0.49763 | 0.318795676 | -0.642441 | 0.00071  | hypomethylated |
| cg05339037 | 0.63515 | 0.406873514 | -0.642517 | 4.94E-05 | hypomethylated |
| cg16569650 | 0.62436 | 0.399958378 | -0.642528 | 0.000191 | hypomethylated |
| cg27153327 | 0.7386  | 0.473137838 | -0.642533 | 3.85E-05 | hypomethylated |
| cg23920016 | 0.84051 | 0.538387027 | -0.642621 | 7.93E-06 | hypomethylated |
| cg09218076 | 0.6109  | 0.391304865 | -0.642643 | 0.000112 | hypomethylated |
| cg10211776 | 0.66643 | 0.426849189 | -0.642727 | 2.51E-05 | hypomethylated |
| cg17942750 | 0.87804 | 0.56238     | -0.642741 | 1.12E-05 | hypomethylated |
| cg02627216 | 0.53474 | 0.342472973 | -0.642847 | 0.000365 | hypomethylated |
| cg07781445 | 0.56369 | 0.361012432 | -0.642853 | 4.60E-06 | hypomethylated |
| cg03889013 | 0.66231 | 0.424154054 | -0.642918 | 0.002599 | hypomethylated |
| cg05349016 | 0.71287 | 0.45652973  | -0.64293  | 0.000104 | hypomethylated |
| cg18859033 | 0.66976 | 0.428891892 | -0.64303  | 4.05E-05 | hypomethylated |
| cg21049397 | 0.60958 | 0.390351892 | -0.64304  | 0.000866 | hypomethylated |

|            |         |             |           |          |                |
|------------|---------|-------------|-----------|----------|----------------|
| cg13940444 | 0.48888 | 0.313026486 | -0.643196 | 0.001314 | hypomethylated |
| cg24822529 | 0.61749 | 0.395363784 | -0.643235 | 0.000126 | hypomethylated |
| cg25630380 | 0.5949  | 0.38086     | -0.643386 | 3.95E-05 | hypomethylated |
| cg13579752 | 0.73009 | 0.4674      | -0.643417 | 1.37E-06 | hypomethylated |
| cg08476984 | 0.66379 | 0.424930811 | -0.643499 | 4.36E-06 | hypomethylated |
| cg16205058 | 0.26299 | 0.168338919 | -0.643639 | 0.000814 | hypomethylated |
| cg04642300 | 0.69498 | 0.444821622 | -0.643745 | 3.85E-05 | hypomethylated |
| cg11162104 | 0.70921 | 0.453901622 | -0.643833 | 1.28E-05 | hypomethylated |
| cg06834507 | 0.65659 | 0.420205405 | -0.643898 | 4.05E-05 | hypomethylated |
| cg16677448 | 0.58561 | 0.374771892 | -0.643927 | 5.51E-05 | hypomethylated |
| cg23537419 | 0.80052 | 0.512290811 | -0.643974 | 2.42E-06 | hypomethylated |
| cg25714865 | 0.86932 | 0.556298378 | -0.644028 | 4.82E-05 | hypomethylated |
| cg04094838 | 0.69298 | 0.443405946 | -0.644186 | 5.07E-06 | hypomethylated |
| cg14713217 | 0.42428 | 0.271473514 | -0.644205 | 0.00035  | hypomethylated |
| cg19859193 | 0.6249  | 0.399811892 | -0.644304 | 1.26E-05 | hypomethylated |
| cg17328839 | 0.62252 | 0.398265405 | -0.64439  | 2.71E-05 | hypomethylated |
| cg14985891 | 0.75109 | 0.480502703 | -0.644441 | 0.000313 | hypomethylated |
| cg16734433 | 0.91678 | 0.586498919 | -0.644447 | 6.48E-06 | hypomethylated |
| cg09648727 | 0.46654 | 0.298461081 | -0.644458 | 0.000528 | hypomethylated |
| cg03597159 | 0.83048 | 0.531238919 | -0.644585 | 1.72E-06 | hypomethylated |
| cg16001384 | 0.74489 | 0.476462703 | -0.644664 | 1.87E-05 | hypomethylated |
| cg25741118 | 0.69358 | 0.443592973 | -0.644826 | 2.79E-06 | hypomethylated |
| cg17233819 | 0.56131 | 0.358972432 | -0.644925 | 0.00017  | hypomethylated |
| cg15503752 | 0.72118 | 0.461196757 | -0.644977 | 1.66E-05 | hypomethylated |
| cg08564487 | 0.69646 | 0.445305405 | -0.645245 | 2.64E-05 | hypomethylated |
| cg13655341 | 0.43884 | 0.280560541 | -0.645383 | 0.000224 | hypomethylated |
| cg11138227 | 0.7179  | 0.458916757 | -0.64555  | 2.64E-06 | hypomethylated |
| cg20777796 | 0.66577 | 0.42556973  | -0.645628 | 0.00097  | hypomethylated |
| cg25885803 | 0.41428 | 0.26471027  | -0.646192 | 0.000277 | hypomethylated |
| cg11072119 | 0.3633  | 0.232117838 | -0.646304 | 0.000464 | hypomethylated |
| cg06974428 | 0.75164 | 0.480224324 | -0.646333 | 7.12E-06 | hypomethylated |
| cg14145074 | 0.36995 | 0.236357297 | -0.646361 | 0.002253 | hypomethylated |
| cg27240158 | 0.54897 | 0.350694595 | -0.646512 | 0.000117 | hypomethylated |
| cg09887955 | 0.51141 | 0.326658378 | -0.646698 | 0.003473 | hypomethylated |
| cg23173466 | 0.29376 | 0.187607027 | -0.646924 | 0.011274 | hypomethylated |
| cg13552026 | 0.56068 | 0.358027568 | -0.647107 | 1.48E-05 | hypomethylated |
| cg16461134 | 0.84261 | 0.537998919 | -0.647262 | 1.02E-06 | hypomethylated |
| cg27199976 | 0.41869 | 0.267316216 | -0.647335 | 0.001635 | hypomethylated |
| cg09412707 | 0.61019 | 0.389577297 | -0.647349 | 4.88E-05 | hypomethylated |
| cg03562120 | 0.70841 | 0.452269189 | -0.647403 | 3.23E-05 | hypomethylated |
| cg18749617 | 0.51972 | 0.331803784 | -0.647404 | 0.001875 | hypomethylated |
| cg12340503 | 0.65775 | 0.419876216 | -0.647575 | 6.54E-05 | hypomethylated |
| cg19319487 | 0.63716 | 0.406713514 | -0.647643 | 0.001041 | hypomethylated |
| cg19373199 | 0.41444 | 0.264545405 | -0.647648 | 4.88E-05 | hypomethylated |
| cg10264003 | 0.70527 | 0.450181081 | -0.64767  | 0.000224 | hypomethylated |
| cg07735586 | 0.55314 | 0.353072973 | -0.647678 | 0.00071  | hypomethylated |
| cg16789230 | 0.54328 | 0.346714054 | -0.64795  | 1.31E-05 | hypomethylated |
| cg27000534 | 0.5691  | 0.363142162 | -0.648148 | 0.002674 | hypomethylated |
| cg01768814 | 0.47901 | 0.305635135 | -0.648245 | 0.019065 | hypomethylated |
| cg06913345 | 0.93802 | 0.598475135 | -0.648327 | 2.57E-06 | hypomethylated |
| cg16934235 | 0.76632 | 0.488884324 | -0.648454 | 1.12E-05 | hypomethylated |
| cg24843609 | 0.71162 | 0.453960541 | -0.64854  | 7.84E-05 | hypomethylated |
| cg20155035 | 0.5593  | 0.356672973 | -0.64902  | 0.001803 | hypomethylated |
| cg26230275 | 0.39805 | 0.253802703 | -0.649242 | 0.000148 | hypomethylated |
| cg02888518 | 0.34796 | 0.221788649 | -0.649736 | 0.00064  | hypomethylated |
| cg08360599 | 0.36185 | 0.23062973  | -0.649813 | 0.00031  | hypomethylated |
| cg02109507 | 0.66719 | 0.425180541 | -0.650022 | 3.40E-05 | hypomethylated |
| cg13410002 | 0.3002  | 0.191299459 | -0.650091 | 4.05E-05 | hypomethylated |

|            |         |             |           |          |                |
|------------|---------|-------------|-----------|----------|----------------|
| cg00131261 | 0.85261 | 0.543306486 | -0.65012  | 2.39E-05 | hypomethylated |
| cg09657114 | 0.83622 | 0.532854595 | -0.650141 | 1.18E-05 | hypomethylated |
| cg21052932 | 0.64458 | 0.410710811 | -0.650237 | 0.000857 | hypomethylated |
| cg10855978 | 0.41256 | 0.262870811 | -0.65025  | 0.000155 | hypomethylated |
| cg14698665 | 0.6613  | 0.421282703 | -0.650516 | 0.000251 | hypomethylated |
| cg25742326 | 0.56411 | 0.359365946 | -0.650523 | 0.00035  | hypomethylated |
| cg17125585 | 0.54019 | 0.344123784 | -0.650539 | 8.15E-06 | hypomethylated |
| cg02524099 | 0.37871 | 0.241244865 | -0.650595 | 0.000725 | hypomethylated |
| cg23560676 | 0.85955 | 0.547517297 | -0.650677 | 4.93E-06 | hypomethylated |
| cg01291854 | 0.88237 | 0.561948108 | -0.650947 | 2.46E-06 | hypomethylated |
| cg17670650 | 0.45011 | 0.286656216 | -0.650956 | 0.000161 | hypomethylated |
| cg19229692 | 0.83353 | 0.530818378 | -0.651016 | 4.73E-06 | hypomethylated |
| cg25212701 | 0.87571 | 0.557544865 | -0.651365 | 5.51E-07 | hypomethylated |
| cg07332757 | 0.42402 | 0.269961081 | -0.651381 | 0.000198 | hypomethylated |
| cg20992708 | 0.76828 | 0.48912973  | -0.651415 | 8.32E-05 | hypomethylated |
| cg17541002 | 0.73699 | 0.46916973  | -0.651535 | 0.000365 | hypomethylated |
| cg21130113 | 0.62064 | 0.395001622 | -0.651898 | 0.002168 | hypomethylated |
| cg06817454 | 0.69779 | 0.444072973 | -0.651996 | 1.60E-05 | hypomethylated |
| cg25676471 | 0.54496 | 0.346809189 | -0.652008 | 0.000921 | hypomethylated |
| cg20216309 | 0.87932 | 0.559588649 | -0.652022 | 3.59E-06 | hypomethylated |
| cg10857221 | 0.44399 | 0.282544324 | -0.65205  | 0.000117 | hypomethylated |
| cg16711332 | 0.86895 | 0.552961622 | -0.652094 | 1.12E-05 | hypomethylated |
| cg02912371 | 0.56733 | 0.361019459 | -0.652112 | 1.07E-06 | hypomethylated |
| cg21527078 | 0.78892 | 0.501961622 | -0.652302 | 2.21E-05 | hypomethylated |
| cg02049243 | 0.60638 | 0.385785405 | -0.652424 | 9.19E-06 | hypomethylated |
| cg19696794 | 0.65474 | 0.416490811 | -0.652637 | 0.000107 | hypomethylated |
| cg07313701 | 0.6305  | 0.401052432 | -0.652706 | 0.000117 | hypomethylated |
| cg26252794 | 0.3805  | 0.24202973  | -0.652712 | 0.001803 | hypomethylated |
| cg09612099 | 0.6632  | 0.421798919 | -0.652889 | 2.07E-05 | hypomethylated |
| cg17819732 | 0.57215 | 0.363885405 | -0.652909 | 1.31E-05 | hypomethylated |
| cg07910075 | 0.70353 | 0.447405946 | -0.653028 | 1.92E-05 | hypomethylated |
| cg16362949 | 0.48129 | 0.306067027 | -0.653059 | 0.00098  | hypomethylated |
| cg03902450 | 0.46259 | 0.294143243 | -0.653215 | 0.000822 | hypomethylated |
| cg23817637 | 0.75519 | 0.48018     | -0.653264 | 0.000102 | hypomethylated |
| cg27504369 | 0.6356  | 0.404130811 | -0.653297 | 3.57E-05 | hypomethylated |
| cg25568114 | 0.90269 | 0.573890811 | -0.653454 | 7.12E-06 | hypomethylated |
| cg11820824 | 0.78059 | 0.49622     | -0.653585 | 1.58E-05 | hypomethylated |
| cg14420953 | 0.73658 | 0.468196757 | -0.653727 | 4.76E-05 | hypomethylated |
| cg09631880 | 0.59505 | 0.37814     | -0.65409  | 2.39E-05 | hypomethylated |
| cg13919908 | 0.73325 | 0.465928108 | -0.654198 | 2.61E-05 | hypomethylated |
| cg24890964 | 0.61502 | 0.390780541 | -0.654275 | 4.94E-05 | hypomethylated |
| cg02920604 | 0.63678 | 0.404592432 | -0.654326 | 6.05E-06 | hypomethylated |
| cg23323158 | 0.72864 | 0.462938378 | -0.654386 | 1.28E-05 | hypomethylated |
| cg03887438 | 0.62095 | 0.394495135 | -0.65447  | 3.96E-06 | hypomethylated |
| cg18860310 | 0.57784 | 0.367092432 | -0.654527 | 4.76E-05 | hypomethylated |
| cg06360703 | 0.39316 | 0.249766486 | -0.654537 | 0.013481 | hypomethylated |
| cg10113526 | 0.64304 | 0.408507027 | -0.654548 | 0.0006   | hypomethylated |
| cg05573829 | 0.79489 | 0.504932432 | -0.654665 | 5.43E-06 | hypomethylated |
| cg15999356 | 0.73542 | 0.467155676 | -0.654665 | 2.16E-06 | hypomethylated |
| cg00355699 | 0.78815 | 0.500647027 | -0.654676 | 8.83E-06 | hypomethylated |
| cg08147181 | 0.60736 | 0.385796757 | -0.654711 | 0.0006   | hypomethylated |
| cg11468193 | 0.40276 | 0.255829189 | -0.65474  | 0.000234 | hypomethylated |
| cg24659037 | 0.91204 | 0.579284865 | -0.654824 | 7.52E-06 | hypomethylated |
| cg09989037 | 0.74246 | 0.471574054 | -0.654829 | 0.000191 | hypomethylated |
| cg04687437 | 0.31778 | 0.201818378 | -0.654971 | 0.001395 | hypomethylated |
| cg15248935 | 0.31607 | 0.200704324 | -0.655172 | 0.002526 | hypomethylated |
| cg17209188 | 0.77948 | 0.494951351 | -0.655225 | 4.70E-05 | hypomethylated |
| cg20299802 | 0.65576 | 0.416372973 | -0.655291 | 1.66E-05 | hypomethylated |



|            |         |             |           |          |                |
|------------|---------|-------------|-----------|----------|----------------|
| cg04244970 | 0.71873 | 0.456273514 | -0.655551 | 0.000115 | hypomethylated |
| cg23750206 | 0.67424 | 0.427959459 | -0.655788 | 0.002106 | hypomethylated |
| cg01392656 | 0.79065 | 0.501791351 | -0.655952 | 4.12E-06 | hypomethylated |
| cg10965581 | 0.6624  | 0.420384865 | -0.655992 | 2.85E-05 | hypomethylated |
| cg02598079 | 0.56568 | 0.358987027 | -0.656054 | 0.002455 | hypomethylated |
| cg16341979 | 0.76653 | 0.486412973 | -0.656161 | 8.83E-06 | hypomethylated |
| cg11118235 | 0.46341 | 0.294023243 | -0.656359 | 0.006015 | hypomethylated |
| cg19348484 | 0.62031 | 0.393443243 | -0.656834 | 0.000283 | hypomethylated |
| cg17600393 | 0.64599 | 0.409726486 | -0.656851 | 3.81E-05 | hypomethylated |
| cg12905085 | 0.40825 | 0.258922162 | -0.656934 | 0.002751 | hypomethylated |
| cg09134497 | 0.71622 | 0.454222162 | -0.657005 | 1.65E-06 | hypomethylated |
| cg01285783 | 0.64994 | 0.412165946 | -0.657081 | 9.69E-06 | hypomethylated |
| cg06011086 | 0.61732 | 0.391471892 | -0.65711  | 0.00039  | hypomethylated |
| cg17563773 | 0.47849 | 0.303372432 | -0.657399 | 2.27E-05 | hypomethylated |
| cg06783197 | 0.60472 | 0.383376216 | -0.657506 | 0.000104 | hypomethylated |
| cg00337466 | 0.39829 | 0.252487027 | -0.65761  | 0.001188 | hypomethylated |
| cg17660833 | 0.76583 | 0.485436757 | -0.657741 | 0.000132 | hypomethylated |
| cg21562208 | 0.83795 | 0.53110973  | -0.657854 | 4.07E-06 | hypomethylated |
| cg02577773 | 0.59304 | 0.375854595 | -0.657955 | 0.000101 | hypomethylated |
| cg00910893 | 0.25517 | 0.161707568 | -0.658072 | 0.000902 | hypomethylated |
| cg22168796 | 0.54739 | 0.346856216 | -0.658231 | 0.001803 | hypomethylated |
| cg18921475 | 0.75036 | 0.475413514 | -0.6584   | 7.72E-06 | hypomethylated |
| cg01797450 | 0.46271 | 0.29315027  | -0.658468 | 0.000107 | hypomethylated |
| cg15387123 | 0.51772 | 0.32799027  | -0.658519 | 0.0003   | hypomethylated |
| cg21614638 | 0.65421 | 0.41444973  | -0.658557 | 0.001262 | hypomethylated |
| cg23437479 | 0.86057 | 0.545152973 | -0.658631 | 1.45E-06 | hypomethylated |
| cg20068496 | 0.42285 | 0.267857297 | -0.658681 | 7.75E-05 | hypomethylated |
| cg12913097 | 0.19863 | 0.125818919 | -0.658735 | 0.008069 | hypomethylated |
| cg01412762 | 0.56245 | 0.356222703 | -0.658945 | 0.005508 | hypomethylated |
| cg08912801 | 0.47092 | 0.298252432 | -0.658948 | 0.000893 | hypomethylated |
| cg21069965 | 0.71242 | 0.451192432 | -0.658985 | 1.50E-05 | hypomethylated |
| cg08071719 | 0.88582 | 0.560948108 | -0.659146 | 4.01E-06 | hypomethylated |
| cg07593977 | 0.688   | 0.435651892 | -0.659233 | 0.00102  | hypomethylated |
| cg22926842 | 0.61313 | 0.388182162 | -0.659459 | 0.0002   | hypomethylated |
| cg13708645 | 0.46984 | 0.297447568 | -0.659534 | 0.000725 | hypomethylated |
| cg26182253 | 0.84466 | 0.534683243 | -0.659686 | 3.21E-06 | hypomethylated |
| cg07945618 | 0.72533 | 0.459046486 | -0.659997 | 1.31E-05 | hypomethylated |
| cg07497941 | 0.67846 | 0.429345405 | -0.660125 | 0.000224 | hypomethylated |
| cg13670306 | 0.26789 | 0.169520541 | -0.660181 | 0.005756 | hypomethylated |
| cg26052586 | 0.69047 | 0.436911351 | -0.660238 | 5.06E-05 | hypomethylated |
| cg25734089 | 0.7585  | 0.479905946 | -0.660397 | 5.06E-05 | hypomethylated |
| cg16728539 | 0.69925 | 0.442313514 | -0.660739 | 0.000517 | hypomethylated |
| cg15161854 | 0.47564 | 0.300832973 | -0.660907 | 0.000214 | hypomethylated |
| cg03316864 | 0.28682 | 0.181407027 | -0.660915 | 4.05E-05 | hypomethylated |
| cg24405567 | 0.51422 | 0.325196216 | -0.661075 | 0.000653 | hypomethylated |
| cg22794304 | 0.39755 | 0.251399459 | -0.661155 | 9.49E-05 | hypomethylated |
| cg23965720 | 0.46457 | 0.293747027 | -0.661322 | 0.001541 | hypomethylated |
| cg15044760 | 0.35869 | 0.226766486 | -0.66153  | 0.0017   | hypomethylated |
| cg00294534 | 0.68609 | 0.433725946 | -0.661614 | 6.39E-06 | hypomethylated |
| cg19955173 | 0.89084 | 0.563081622 | -0.661822 | 3.69E-06 | hypomethylated |
| cg04589210 | 0.60053 | 0.379575135 | -0.661851 | 2.71E-05 | hypomethylated |
| cg01860897 | 0.28201 | 0.178232973 | -0.661982 | 0.001541 | hypomethylated |
| cg10196558 | 0.44903 | 0.283778378 | -0.662047 | 0.000112 | hypomethylated |
| cg02710534 | 0.7231  | 0.456921622 | -0.662248 | 1.09E-05 | hypomethylated |
| cg21537187 | 0.72048 | 0.455160541 | -0.662583 | 1.21E-05 | hypomethylated |
| cg18007641 | 0.58991 | 0.372664324 | -0.662618 | 2.35E-05 | hypomethylated |
| cg16622061 | 0.36943 | 0.233369189 | -0.662687 | 0.000166 | hypomethylated |
| cg23230478 | 0.9176  | 0.579497297 | -0.663063 | 1.28E-05 | hypomethylated |

|            |         |             |           |          |                |
|------------|---------|-------------|-----------|----------|----------------|
| cg08976687 | 0.82911 | 0.523607027 | -0.663079 | 4.36E-06 | hypomethylated |
| cg27494897 | 0.5844  | 0.369044865 | -0.66316  | 0.0002   | hypomethylated |
| cg00782811 | 0.58296 | 0.368112973 | -0.663248 | 0.0012   | hypomethylated |
| cg14050824 | 0.92932 | 0.586797297 | -0.663313 | 6.13E-06 | hypomethylated |
| cg08977611 | 0.44899 | 0.283494595 | -0.663362 | 2.10E-05 | hypomethylated |
| cg04956471 | 0.52325 | 0.330303243 | -0.663709 | 0.000633 | hypomethylated |
| cg19372602 | 0.39637 | 0.250202703 | -0.66375  | 0.000517 | hypomethylated |
| cg12894524 | 0.53742 | 0.339158378 | -0.664091 | 0.00101  | hypomethylated |
| cg16137928 | 0.52467 | 0.331104324 | -0.664124 | 0.000214 | hypomethylated |
| cg17152989 | 0.30828 | 0.194537838 | -0.664191 | 2.30E-05 | hypomethylated |
| cg10800346 | 0.73982 | 0.466832973 | -0.664268 | 0.000109 | hypomethylated |
| cg24859433 | 0.54267 | 0.34236     | -0.664561 | 0.000115 | hypomethylated |
| cg11768167 | 0.2612  | 0.164781081 | -0.664604 | 0.00421  | hypomethylated |
| cg19244029 | 0.60991 | 0.384743784 | -0.664698 | 0.000234 | hypomethylated |
| cg16366686 | 0.45754 | 0.288591892 | -0.664867 | 0.000109 | hypomethylated |
| cg05394294 | 0.84118 | 0.530394054 | -0.66535  | 0.000172 | hypomethylated |
| cg02989244 | 0.58537 | 0.369088649 | -0.665381 | 0.006915 | hypomethylated |
| cg22261694 | 0.62486 | 0.393948108 | -0.665527 | 0.00421  | hypomethylated |
| cg04208434 | 0.46946 | 0.295962703 | -0.665587 | 0.00071  | hypomethylated |
| cg24773560 | 0.49628 | 0.312854595 | -0.665662 | 0.002231 | hypomethylated |
| cg27062243 | 0.56373 | 0.355324324 | -0.665868 | 3.85E-05 | hypomethylated |
| cg26369382 | 0.76109 | 0.479721081 | -0.665871 | 3.69E-06 | hypomethylated |
| cg06388099 | 0.30723 | 0.193630811 | -0.666011 | 0.002296 | hypomethylated |
| cg07157333 | 0.61688 | 0.388755676 | -0.666126 | 1.75E-05 | hypomethylated |
| cg21981144 | 0.50714 | 0.319595676 | -0.666136 | 3.76E-05 | hypomethylated |
| cg20945055 | 0.75179 | 0.473756216 | -0.666185 | 4.15E-05 | hypomethylated |
| cg13283635 | 0.47752 | 0.300867568 | -0.666433 | 0.001395 | hypomethylated |
| cg19008097 | 0.4518  | 0.284658378 | -0.666453 | 3.07E-05 | hypomethylated |
| cg06978117 | 0.78566 | 0.494943243 | -0.666642 | 7.29E-05 | hypomethylated |
| cg18633230 | 0.72963 | 0.459644324 | -0.666647 | 1.15E-05 | hypomethylated |
| cg01066157 | 0.66271 | 0.417476216 | -0.666684 | 6.86E-05 | hypomethylated |
| cg08437570 | 0.33612 | 0.211715135 | -0.666852 | 0.008563 | hypomethylated |
| cg23015138 | 0.37505 | 0.236220541 | -0.666949 | 0.008636 | hypomethylated |
| cg13100118 | 0.80739 | 0.508516216 | -0.666972 | 4.64E-05 | hypomethylated |
| cg23564178 | 0.39176 | 0.246741081 | -0.666972 | 0.000327 | hypomethylated |
| cg08119452 | 0.74878 | 0.471587568 | -0.667016 | 1.71E-05 | hypomethylated |
| cg03813377 | 0.35558 | 0.223936757 | -0.667083 | 0.000575 | hypomethylated |
| cg25378181 | 0.59133 | 0.372406486 | -0.667085 | 1.92E-05 | hypomethylated |
| cg03265268 | 0.83111 | 0.523393514 | -0.667143 | 3.79E-06 | hypomethylated |
| cg14733031 | 0.51958 | 0.327154595 | -0.667373 | 0.000485 | hypomethylated |
| cg03919488 | 0.67662 | 0.426032973 | -0.667381 | 5.19E-05 | hypomethylated |
| cg02184226 | 0.80865 | 0.509112973 | -0.66753  | 6.75E-06 | hypomethylated |
| cg27583534 | 0.45036 | 0.283537297 | -0.66754  | 4.94E-05 | hypomethylated |
| cg07745373 | 0.44626 | 0.280943784 | -0.667603 | 0.000412 | hypomethylated |
| cg21868063 | 0.68907 | 0.433786486 | -0.667665 | 1.31E-05 | hypomethylated |
| cg21196201 | 0.46836 | 0.294820541 | -0.667781 | 4.70E-05 | hypomethylated |
| cg03193328 | 0.57282 | 0.360568108 | -0.66781  | 0.001667 | hypomethylated |
| cg14091840 | 0.79774 | 0.502105405 | -0.667928 | 1.99E-06 | hypomethylated |
| cg04134818 | 0.28139 | 0.177091892 | -0.668073 | 0.000161 | hypomethylated |
| cg01751245 | 0.76372 | 0.480619459 | -0.668149 | 8.94E-05 | hypomethylated |
| cg19263548 | 0.75708 | 0.476400541 | -0.668271 | 4.12E-06 | hypomethylated |
| cg12415569 | 0.53785 | 0.338434054 | -0.668329 | 6.95E-05 | hypomethylated |
| cg14646244 | 0.7412  | 0.46616     | -0.669038 | 0.000229 | hypomethylated |
| cg22708150 | 0.78763 | 0.495341081 | -0.669096 | 0.000187 | hypomethylated |
| cg07906484 | 0.73188 | 0.460278378 | -0.6691   | 3.39E-06 | hypomethylated |
| cg10505873 | 0.22579 | 0.141998919 | -0.669102 | 0.00035  | hypomethylated |
| cg17250262 | 0.44169 | 0.277749189 | -0.669251 | 2.24E-05 | hypomethylated |
| cg04246167 | 0.72119 | 0.453468649 | -0.669377 | 9.16E-05 | hypomethylated |

|            |         |             |           |          |                |
|------------|---------|-------------|-----------|----------|----------------|
| cg02659568 | 0.79437 | 0.499398919 | -0.669618 | 9.57E-06 | hypomethylated |
| cg05146922 | 0.62731 | 0.394241081 | -0.6701   | 1.99E-06 | hypomethylated |
| cg22681001 | 0.32494 | 0.204207568 | -0.670137 | 0.000395 | hypomethylated |
| cg10342016 | 0.5689  | 0.357472432 | -0.670343 | 1.28E-05 | hypomethylated |
| cg23315892 | 0.66972 | 0.420794595 | -0.670442 | 2.10E-06 | hypomethylated |
| cg24894531 | 0.86569 | 0.543903784 | -0.670499 | 4.01E-06 | hypomethylated |
| cg08916374 | 0.51    | 0.320402162 | -0.670613 | 2.27E-05 | hypomethylated |
| cg13745870 | 0.54571 | 0.342657838 | -0.671366 | 0.001262 | hypomethylated |
| cg14106234 | 0.88267 | 0.554147568 | -0.671604 | 1.12E-05 | hypomethylated |
| cg27408541 | 0.54011 | 0.339048649 | -0.671761 | 0.003225 | hypomethylated |
| cg19040266 | 0.58284 | 0.365855676 | -0.671825 | 0.000115 | hypomethylated |
| cg21937377 | 0.76884 | 0.482452973 | -0.672295 | 0.001096 | hypomethylated |
| cg12072001 | 0.47002 | 0.294921622 | -0.672391 | 0.00032  | hypomethylated |
| cg26035201 | 0.83253 | 0.522360541 | -0.672456 | 1.33E-06 | hypomethylated |
| cg17112426 | 0.71084 | 0.445918378 | -0.672745 | 1.08E-05 | hypomethylated |
| cg18720687 | 0.37986 | 0.238288108 | -0.672761 | 0.000979 | hypomethylated |
| cg10523140 | 0.43932 | 0.275573514 | -0.672835 | 0.004059 | hypomethylated |
| cg18114313 | 0.65759 | 0.412473514 | -0.672887 | 8.42E-05 | hypomethylated |
| cg27173717 | 0.55937 | 0.350848649 | -0.672954 | 0.000287 | hypomethylated |
| cg08043565 | 0.57454 | 0.360342703 | -0.673038 | 1.50E-05 | hypomethylated |
| cg16002660 | 0.56195 | 0.352391351 | -0.673263 | 0.00012  | hypomethylated |
| cg04563996 | 0.59566 | 0.37353027  | -0.673264 | 0.0006   | hypomethylated |
| cg02502358 | 0.5097  | 0.319534595 | -0.673676 | 0.000256 | hypomethylated |
| cg09517873 | 0.68755 | 0.430964324 | -0.673896 | 0.000756 | hypomethylated |
| cg25594736 | 0.7141  | 0.447598378 | -0.673921 | 0.000912 | hypomethylated |
| cg10081994 | 0.76405 | 0.478834054 | -0.674141 | 7.93E-06 | hypomethylated |
| cg26484813 | 0.65182 | 0.408497838 | -0.674145 | 0.000204 | hypomethylated |
| cg10897459 | 0.57489 | 0.360245946 | -0.674304 | 3.57E-05 | hypomethylated |
| cg07082267 | 0.4015  | 0.251590811 | -0.674321 | 0.000138 | hypomethylated |
| cg13522882 | 0.35383 | 0.221719459 | -0.674321 | 0.000528 | hypomethylated |
| cg00752263 | 0.36695 | 0.229931892 | -0.674377 | 8.22E-05 | hypomethylated |
| cg24152264 | 0.59733 | 0.374271892 | -0.674441 | 3.67E-05 | hypomethylated |
| cg27404606 | 0.26019 | 0.163017838 | -0.674536 | 0.003021 | hypomethylated |
| cg09981407 | 0.44756 | 0.280384324 | -0.674675 | 0.00134  | hypomethylated |
| cg07157107 | 0.53852 | 0.337361081 | -0.674706 | 0.000145 | hypomethylated |
| cg02101833 | 0.56724 | 0.355282162 | -0.674994 | 0.000681 | hypomethylated |
| cg00939627 | 0.51017 | 0.319520541 | -0.675069 | 3.49E-05 | hypomethylated |
| cg26113233 | 0.6294  | 0.394184865 | -0.675105 | 2.04E-05 | hypomethylated |
| cg10340048 | 0.71018 | 0.444758919 | -0.675161 | 3.62E-05 | hypomethylated |
| cg06342072 | 0.67972 | 0.425679459 | -0.675173 | 2.85E-05 | hypomethylated |
| cg00207428 | 0.61931 | 0.387845946 | -0.675178 | 1.35E-05 | hypomethylated |
| cg23199335 | 0.43057 | 0.269631351 | -0.67526  | 0.046858 | hypomethylated |
| cg26853536 | 0.4501  | 0.281824324 | -0.675449 | 2.10E-05 | hypomethylated |
| cg27298940 | 0.84374 | 0.528238919 | -0.675608 | 5.89E-06 | hypomethylated |
| cg22147446 | 0.61027 | 0.382052973 | -0.675675 | 7.84E-05 | hypomethylated |
| cg01306183 | 0.81857 | 0.512432973 | -0.675742 | 5.89E-06 | hypomethylated |
| cg02661728 | 0.84004 | 0.525671892 | -0.676295 | 6.05E-06 | hypomethylated |
| cg27410595 | 0.6493  | 0.406296757 | -0.676351 | 1.28E-05 | hypomethylated |
| cg07207490 | 0.53087 | 0.332118919 | -0.676659 | 0.000138 | hypomethylated |
| cg04462662 | 0.83291 | 0.520992973 | -0.676897 | 6.05E-06 | hypomethylated |
| cg09127107 | 0.63276 | 0.39576973  | -0.676997 | 1.18E-06 | hypomethylated |
| cg14537247 | 0.56024 | 0.350405405 | -0.67702  | 4.00E-05 | hypomethylated |
| cg27165884 | 0.42837 | 0.267924865 | -0.677029 | 0.000741 | hypomethylated |
| cg13568106 | 0.75203 | 0.470354054 | -0.677043 | 3.49E-05 | hypomethylated |
| cg27181349 | 0.57973 | 0.362544324 | -0.677224 | 0.000789 | hypomethylated |
| cg14096207 | 0.46795 | 0.292632973 | -0.677262 | 0.000103 | hypomethylated |
| cg14688342 | 0.69723 | 0.435977838 | -0.67738  | 1.29E-06 | hypomethylated |
| cg13136655 | 0.5823  | 0.364110811 | -0.677385 | 0.001667 | hypomethylated |

|            |         |             |           |          |                |
|------------|---------|-------------|-----------|----------|----------------|
| cg14904363 | 0.27696 | 0.173177297 | -0.677428 | 0.006015 | hypomethylated |
| cg14284257 | 0.83815 | 0.524047568 | -0.677511 | 2.16E-06 | hypomethylated |
| cg19930352 | 0.56429 | 0.352695676 | -0.678013 | 0.000403 | hypomethylated |
| cg07754940 | 0.60151 | 0.375897838 | -0.678248 | 0.00255  | hypomethylated |
| cg23856611 | 0.70984 | 0.443427568 | -0.678795 | 0.000293 | hypomethylated |
| cg06218079 | 0.82571 | 0.515758919 | -0.678938 | 6.78E-05 | hypomethylated |
| cg23731595 | 0.44177 | 0.275924324 | -0.679023 | 9.16E-05 | hypomethylated |
| cg27549186 | 0.5746  | 0.358877297 | -0.679067 | 0.002189 | hypomethylated |
| cg01513157 | 0.6816  | 0.425658919 | -0.679227 | 0.000313 | hypomethylated |
| cg07495704 | 0.52722 | 0.329225946 | -0.679327 | 0.000251 | hypomethylated |
| cg21335012 | 0.69829 | 0.436017838 | -0.679439 | 3.15E-05 | hypomethylated |
| cg18842107 | 0.76979 | 0.480572432 | -0.679711 | 2.10E-05 | hypomethylated |
| cg13477614 | 0.51689 | 0.322669189 | -0.679801 | 0.000581 | hypomethylated |
| cg22760287 | 0.75076 | 0.468656757 | -0.67982  | 1.15E-05 | hypomethylated |
| cg01546820 | 0.42808 | 0.267220541 | -0.67985  | 4.73E-06 | hypomethylated |
| cg07786675 | 0.85392 | 0.532981622 | -0.680015 | 7.51E-06 | hypomethylated |
| cg27262041 | 0.54309 | 0.338952973 | -0.680106 | 0.000317 | hypomethylated |
| cg03330678 | 0.54868 | 0.342438919 | -0.680118 | 0.000198 | hypomethylated |
| cg02782895 | 0.36065 | 0.225086486 | -0.68012  | 3.15E-05 | hypomethylated |
| cg27461254 | 0.62411 | 0.389510811 | -0.680137 | 0.000178 | hypomethylated |
| cg12586347 | 0.34648 | 0.216235676 | -0.680168 | 0.000109 | hypomethylated |
| cg25063165 | 0.39354 | 0.245601622 | -0.68019  | 0.000132 | hypomethylated |
| cg14064268 | 0.47671 | 0.297492432 | -0.680259 | 1.08E-05 | hypomethylated |
| cg14644871 | 0.40512 | 0.252807027 | -0.680313 | 0.001237 | hypomethylated |
| cg01753788 | 0.4783  | 0.298423243 | -0.680556 | 2.78E-05 | hypomethylated |
| cg13252152 | 0.36222 | 0.225985405 | -0.680637 | 0.000454 | hypomethylated |
| cg08159594 | 0.40688 | 0.253833514 | -0.680721 | 6.48E-06 | hypomethylated |
| cg05255994 | 0.83133 | 0.518614054 | -0.68076  | 1.99E-05 | hypomethylated |
| cg19255783 | 0.50472 | 0.314842703 | -0.680852 | 0.0002   | hypomethylated |
| cg07911961 | 0.54382 | 0.339063784 | -0.681573 | 0.000172 | hypomethylated |
| cg01543184 | 0.52621 | 0.328072973 | -0.681622 | 0.000464 | hypomethylated |
| cg12494529 | 0.78956 | 0.492257297 | -0.681636 | 8.15E-06 | hypomethylated |
| cg13804575 | 0.52189 | 0.325375676 | -0.681639 | 0.000839 | hypomethylated |
| cg14780070 | 0.69232 | 0.431627568 | -0.681652 | 8.03E-05 | hypomethylated |
| cg19781870 | 0.33228 | 0.207158919 | -0.681662 | 0.000234 | hypomethylated |
| cg23904247 | 0.44783 | 0.279197838 | -0.681663 | 0.012535 | hypomethylated |
| cg12542656 | 0.66504 | 0.414528108 | -0.681971 | 0.000187 | hypomethylated |
| cg01637090 | 0.52368 | 0.326405405 | -0.682021 | 5.86E-05 | hypomethylated |
| cg13514772 | 0.49724 | 0.309892432 | -0.682175 | 0.000109 | hypomethylated |
| cg19483007 | 0.31875 | 0.198631892 | -0.682328 | 0.000174 | hypomethylated |
| cg19352830 | 0.50569 | 0.315036757 | -0.682733 | 2.79E-06 | hypomethylated |
| cg04188351 | 0.41699 | 0.259771351 | -0.68277  | 0.000646 | hypomethylated |
| cg18668449 | 0.76416 | 0.476046486 | -0.682772 | 3.04E-06 | hypomethylated |
| cg27262821 | 0.72895 | 0.45406973  | -0.682906 | 1.35E-05 | hypomethylated |
| cg19478820 | 0.69287 | 0.43152973  | -0.683125 | 5.73E-06 | hypomethylated |
| cg24603113 | 0.45436 | 0.282971892 | -0.683177 | 0.001803 | hypomethylated |
| cg21108085 | 0.56742 | 0.353266486 | -0.68366  | 0.003773 | hypomethylated |
| cg07081477 | 0.61047 | 0.380017838 | -0.683853 | 0.001262 | hypomethylated |
| cg08913523 | 0.53925 | 0.335671351 | -0.683905 | 0.004485 | hypomethylated |
| cg03547355 | 0.41023 | 0.255296757 | -0.684258 | 2.42E-05 | hypomethylated |
| cg20561830 | 0.30289 | 0.18847027  | -0.684457 | 0.015809 | hypomethylated |
| cg10816760 | 0.34859 | 0.216855676 | -0.684796 | 0.0003   | hypomethylated |
| cg02068356 | 0.54886 | 0.341434054 | -0.684831 | 0.000195 | hypomethylated |
| cg23116540 | 0.53835 | 0.334864324 | -0.684968 | 0.000102 | hypomethylated |
| cg12999267 | 0.43487 | 0.270496757 | -0.684973 | 7.32E-06 | hypomethylated |
| cg02816525 | 0.78699 | 0.489498919 | -0.68504  | 9.27E-05 | hypomethylated |
| cg21493727 | 0.73746 | 0.458657297 | -0.685148 | 1.84E-05 | hypomethylated |
| cg13177275 | 0.70083 | 0.435852973 | -0.685223 | 1.94E-05 | hypomethylated |

|            |         |             |           |          |                |
|------------|---------|-------------|-----------|----------|----------------|
| cg26451345 | 0.82249 | 0.5115      | -0.685264 | 4.73E-06 | hypomethylated |
| cg01610979 | 0.64386 | 0.400336216 | -0.685535 | 0.000365 | hypomethylated |
| cg03221483 | 0.55312 | 0.343857838 | -0.68578  | 0.00017  | hypomethylated |
| cg04987122 | 0.87365 | 0.543083243 | -0.685882 | 4.01E-06 | hypomethylated |
| cg25198049 | 0.6547  | 0.406947568 | -0.685991 | 0.001107 | hypomethylated |
| cg13992911 | 0.28875 | 0.179464324 | -0.686124 | 1.42E-05 | hypomethylated |
| cg01674147 | 0.60582 | 0.376510811 | -0.686198 | 2.95E-06 | hypomethylated |
| cg16409409 | 0.62061 | 0.385698919 | -0.686212 | 0.000382 | hypomethylated |
| cg17349632 | 0.83867 | 0.521178378 | -0.686326 | 3.30E-06 | hypomethylated |
| cg18110015 | 0.70835 | 0.440171351 | -0.686397 | 9.82E-06 | hypomethylated |
| cg06762332 | 0.76601 | 0.475988108 | -0.686438 | 2.21E-05 | hypomethylated |
| cg24505687 | 0.31551 | 0.196018919 | -0.686693 | 8.84E-05 | hypomethylated |
| cg10083464 | 0.44985 | 0.279441622 | -0.686897 | 0.000214 | hypomethylated |
| cg08220120 | 0.63056 | 0.391667568 | -0.687004 | 6.39E-06 | hypomethylated |
| cg27149973 | 0.44959 | 0.279258378 | -0.687009 | 0.00071  | hypomethylated |
| cg10976218 | 0.58022 | 0.360395676 | -0.687018 | 3.54E-06 | hypomethylated |
| cg14671011 | 0.74448 | 0.462405405 | -0.687075 | 1.15E-05 | hypomethylated |
| cg11769476 | 0.54761 | 0.340122162 | -0.687096 | 0.00099  | hypomethylated |
| cg06264679 | 0.34465 | 0.214047027 | -0.687204 | 0.000293 | hypomethylated |
| cg27083087 | 0.82097 | 0.509777297 | -0.687462 | 1.80E-05 | hypomethylated |
| cg22795471 | 0.3843  | 0.238618919 | -0.687525 | 0.00064  | hypomethylated |
| cg14131038 | 0.44496 | 0.276261081 | -0.687643 | 0.0002   | hypomethylated |
| cg10825315 | 0.48319 | 0.299956216 | -0.687839 | 0.000459 | hypomethylated |
| cg04178634 | 0.71008 | 0.440793514 | -0.687879 | 1.87E-05 | hypomethylated |
| cg25065131 | 0.66995 | 0.415855676 | -0.687971 | 1.42E-05 | hypomethylated |
| cg02604730 | 0.74303 | 0.461171351 | -0.688118 | 3.59E-06 | hypomethylated |
| cg23839571 | 0.37075 | 0.230086486 | -0.68827  | 0.000342 | hypomethylated |
| cg20617957 | 0.41135 | 0.255261081 | -0.688393 | 0.004951 | hypomethylated |
| cg23542902 | 0.58673 | 0.364065405 | -0.688499 | 0.000588 | hypomethylated |
| cg00416710 | 0.71754 | 0.445207027 | -0.688583 | 4.15E-05 | hypomethylated |
| cg07837078 | 0.77476 | 0.480637297 | -0.688801 | 4.73E-06 | hypomethylated |
| cg08284233 | 0.68473 | 0.424784865 | -0.688803 | 0.00012  | hypomethylated |
| cg26705724 | 0.52043 | 0.32281027  | -0.689018 | 0.000485 | hypomethylated |
| cg19061696 | 0.74156 | 0.45996973  | -0.689025 | 1.31E-05 | hypomethylated |
| cg05209306 | 0.51803 | 0.321310811 | -0.689066 | 0.000159 | hypomethylated |
| cg01708377 | 0.8257  | 0.512123784 | -0.689125 | 5.58E-06 | hypomethylated |
| cg19836199 | 0.67476 | 0.418464865 | -0.689268 | 0.001511 | hypomethylated |
| cg10005270 | 0.76107 | 0.471984324 | -0.68929  | 4.12E-06 | hypomethylated |
| cg24348240 | 0.39335 | 0.243932973 | -0.689329 | 0.001571 | hypomethylated |
| cg15617950 | 0.38009 | 0.235709189 | -0.689333 | 0.001212 | hypomethylated |
| cg22990967 | 0.53256 | 0.330227568 | -0.689484 | 0.001734 | hypomethylated |
| cg01426968 | 0.62722 | 0.388905405 | -0.689552 | 2.45E-05 | hypomethylated |
| cg23102014 | 0.62958 | 0.390368649 | -0.689553 | 4.94E-05 | hypomethylated |
| cg05592245 | 0.57369 | 0.355699459 | -0.689613 | 2.21E-05 | hypomethylated |
| cg15282973 | 0.64133 | 0.397549189 | -0.689934 | 1.80E-05 | hypomethylated |
| cg19893585 | 0.5856  | 0.362983243 | -0.690013 | 6.46E-05 | hypomethylated |
| cg06092869 | 0.47554 | 0.294761081 | -0.690021 | 5.31E-05 | hypomethylated |
| cg13026629 | 0.75481 | 0.467719459 | -0.69047  | 8.83E-06 | hypomethylated |
| cg05711445 | 0.53171 | 0.329407027 | -0.690768 | 0.000342 | hypomethylated |
| cg08550523 | 0.83906 | 0.5198      | -0.690817 | 1.18E-05 | hypomethylated |
| cg13794404 | 0.50991 | 0.315863243 | -0.690943 | 7.84E-05 | hypomethylated |
| cg08765100 | 0.55978 | 0.346694054 | -0.691197 | 8.42E-05 | hypomethylated |
| cg09776772 | 0.84726 | 0.524695676 | -0.691324 | 3.67E-05 | hypomethylated |
| cg26605164 | 0.74644 | 0.462164324 | -0.69162  | 2.15E-05 | hypomethylated |
| cg20938802 | 0.73103 | 0.452612973 | -0.691653 | 2.27E-05 | hypomethylated |
| cg18887230 | 0.33484 | 0.207311892 | -0.691669 | 0.000403 | hypomethylated |
| cg06399735 | 0.50601 | 0.313254595 | -0.69183  | 0.001381 | hypomethylated |
| cg19512473 | 0.49897 | 0.308831351 | -0.692134 | 0.000358 | hypomethylated |

|                 |         |             |           |          |                |
|-----------------|---------|-------------|-----------|----------|----------------|
| cg02088785      | 0.55631 | 0.344312973 | -0.692168 | 2.45E-05 | hypomethylated |
| cg15765546      | 0.6784  | 0.419867027 | -0.692204 | 9.31E-06 | hypomethylated |
| cg24060040      | 0.36458 | 0.225627027 | -0.692296 | 0.003843 | hypomethylated |
| cg17262810      | 0.67855 | 0.419922162 | -0.692333 | 0.000667 | hypomethylated |
| cg22681709      | 0.70775 | 0.437956757 | -0.692451 | 3.00E-05 | hypomethylated |
| cg01657995      | 0.3956  | 0.244762162 | -0.692662 | 0.000931 | hypomethylated |
| cg00433917      | 0.62949 | 0.38937027  | -0.693041 | 4.58E-05 | hypomethylated |
| cg12265130      | 0.4319  | 0.267134054 | -0.693133 | 0.000313 | hypomethylated |
| cg08033031      | 0.28065 | 0.173530811 | -0.69358  | 0.002478 | hypomethylated |
| ch.6.113866684R | 0.26693 | 0.165038919 | -0.693655 | 0.001074 | hypomethylated |
| cg07835482      | 0.65758 | 0.406504865 | -0.693894 | 5.28E-06 | hypomethylated |
| cg26546113      | 0.54368 | 0.336068649 | -0.694002 | 0.000148 | hypomethylated |
| cg15754112      | 0.69811 | 0.431479459 | -0.694162 | 1.71E-05 | hypomethylated |
| cg16477879      | 0.77052 | 0.476215676 | -0.694217 | 2.15E-05 | hypomethylated |
| cg10880902      | 0.39845 | 0.246251892 | -0.694264 | 0.000506 | hypomethylated |
| cg04057956      | 0.54981 | 0.339739459 | -0.694504 | 0.000426 | hypomethylated |
| cg01903799      | 0.57573 | 0.355701081 | -0.694727 | 8.63E-05 | hypomethylated |
| cg01723892      | 0.45372 | 0.280317838 | -0.694739 | 0.000454 | hypomethylated |
| cg20533982      | 0.75105 | 0.463981081 | -0.694843 | 4.36E-06 | hypomethylated |
| cg14506696      | 0.6179  | 0.381685405 | -0.694989 | 0.000857 | hypomethylated |
| cg13385210      | 0.53364 | 0.329624865 | -0.695042 | 7.29E-05 | hypomethylated |
| cg15774391      | 0.46141 | 0.285001622 | -0.695079 | 0.003571 | hypomethylated |
| cg05901357      | 0.35462 | 0.218992432 | -0.695393 | 0.000445 | hypomethylated |
| cg06958636      | 0.47069 | 0.290655676 | -0.695466 | 2.51E-05 | hypomethylated |
| cg05973398      | 0.4298  | 0.265378378 | -0.695615 | 0.000454 | hypomethylated |
| cg00041401      | 0.6092  | 0.376101622 | -0.695793 | 0.004776 | hypomethylated |
| cg18221226      | 0.38125 | 0.235363784 | -0.695845 | 0.000569 | hypomethylated |
| cg07507418      | 0.55825 | 0.344567568 | -0.696124 | 0.000152 | hypomethylated |
| cg08015107      | 0.5167  | 0.318916757 | -0.696147 | 0.000224 | hypomethylated |
| cg10051588      | 0.71869 | 0.443579459 | -0.696177 | 2.18E-05 | hypomethylated |
| cg27226320      | 0.51931 | 0.320470811 | -0.696403 | 0.002574 | hypomethylated |
| cg20327845      | 0.621   | 0.383212973 | -0.696447 | 9.95E-05 | hypomethylated |
| cg09890077      | 0.53207 | 0.328321081 | -0.696509 | 8.15E-06 | hypomethylated |
| cg26711638      | 0.55464 | 0.342247568 | -0.696511 | 8.83E-06 | hypomethylated |
| cg27407935      | 0.30449 | 0.187876757 | -0.696608 | 6.95E-05 | hypomethylated |
| cg00324097      | 0.3001  | 0.185143784 | -0.696797 | 0.001164 | hypomethylated |
| cg13435834      | 0.72553 | 0.447503784 | -0.697135 | 9.95E-05 | hypomethylated |
| cg21027526      | 0.33536 | 0.206761622 | -0.697742 | 0.000703 | hypomethylated |
| cg16764274      | 0.29272 | 0.180464865 | -0.697803 | 2.78E-05 | hypomethylated |
| cg19284277      | 0.35624 | 0.219607568 | -0.697922 | 0.001423 | hypomethylated |
| cg10094886      | 0.8453  | 0.520984865 | -0.698222 | 3.30E-06 | hypomethylated |
| cg08521995      | 0.60258 | 0.371378919 | -0.698261 | 1.75E-05 | hypomethylated |
| cg09183450      | 0.35969 | 0.221638919 | -0.698543 | 0.00255  | hypomethylated |
| cg11321083      | 0.50343 | 0.310159459 | -0.698781 | 0.000399 | hypomethylated |
| cg20244273      | 0.60415 | 0.372187568 | -0.698877 | 4.05E-05 | hypomethylated |
| cg17436656      | 0.40206 | 0.247622703 | -0.699267 | 5.86E-05 | hypomethylated |
| cg06939851      | 0.52094 | 0.320838378 | -0.69927  | 5.45E-05 | hypomethylated |
| cg09462956      | 0.63032 | 0.388175135 | -0.699377 | 4.05E-05 | hypomethylated |
| cg21946631      | 0.74266 | 0.457268649 | -0.69966  | 2.51E-05 | hypomethylated |
| cg04744624      | 0.4889  | 0.300959459 | -0.69997  | 0.000805 | hypomethylated |
| cg03475190      | 0.39316 | 0.242019459 | -0.699993 | 0.001571 | hypomethylated |
| cg05725404      | 0.5052  | 0.310976757 | -0.700048 | 0.000382 | hypomethylated |
| cg08899105      | 0.49134 | 0.302421622 | -0.70016  | 1.80E-05 | hypomethylated |
| cg16067628      | 0.80597 | 0.496064324 | -0.700199 | 3.49E-06 | hypomethylated |
| cg23251746      | 0.61452 | 0.378189189 | -0.700352 | 0.00035  | hypomethylated |
| cg07972458      | 0.40364 | 0.248396757 | -0.700423 | 2.64E-05 | hypomethylated |
| cg11539857      | 0.87949 | 0.541198919 | -0.700508 | 1.06E-05 | hypomethylated |
| cg23283335      | 0.5136  | 0.316011351 | -0.700669 | 6.46E-05 | hypomethylated |

|            |         |             |           |          |                |
|------------|---------|-------------|-----------|----------|----------------|
| cg23250795 | 0.87404 | 0.537658378 | -0.70101  | 2.15E-05 | hypomethylated |
| cg08601673 | 0.45315 | 0.278721081 | -0.701167 | 0.0006   | hypomethylated |
| cg12232146 | 0.69448 | 0.427112432 | -0.701317 | 9.27E-05 | hypomethylated |
| cg20955688 | 0.49821 | 0.306372432 | -0.701467 | 0.011274 | hypomethylated |
| cg25278144 | 0.66519 | 0.409055135 | -0.701471 | 4.86E-06 | hypomethylated |
| cg10453071 | 0.49881 | 0.306733514 | -0.701505 | 0.000117 | hypomethylated |
| cg00471159 | 0.48473 | 0.298037297 | -0.701688 | 0.001212 | hypomethylated |
| cg05623526 | 0.54006 | 0.332017297 | -0.701861 | 0.00043  | hypomethylated |
| cg04810745 | 0.79976 | 0.491652973 | -0.701927 | 1.50E-05 | hypomethylated |
| cg17440044 | 0.33852 | 0.208097297 | -0.701983 | 0.001237 | hypomethylated |
| cg08912666 | 0.77627 | 0.47714973  | -0.702116 | 1.50E-05 | hypomethylated |
| cg27280535 | 0.46947 | 0.288534595 | -0.702289 | 0.000117 | hypomethylated |
| cg16861964 | 0.58861 | 0.361703784 | -0.702503 | 0.000219 | hypomethylated |
| cg16291048 | 0.79558 | 0.488887027 | -0.702506 | 3.30E-06 | hypomethylated |
| cg08754149 | 0.73536 | 0.451854054 | -0.702594 | 3.15E-05 | hypomethylated |
| cg04084348 | 0.41006 | 0.251967568 | -0.702597 | 0.000361 | hypomethylated |
| cg18808466 | 0.73025 | 0.448697297 | -0.702648 | 8.71E-06 | hypomethylated |
| cg18388547 | 0.52962 | 0.325381622 | -0.702825 | 0.00035  | hypomethylated |
| cg05447023 | 0.83739 | 0.514447568 | -0.702876 | 9.82E-06 | hypomethylated |
| cg08983279 | 0.64405 | 0.395663243 | -0.7029   | 2.24E-05 | hypomethylated |
| cg04956949 | 0.64816 | 0.398176216 | -0.702943 | 3.04E-06 | hypomethylated |
| cg13447566 | 0.7606  | 0.467201622 | -0.703093 | 4.82E-05 | hypomethylated |
| cg19913118 | 0.52066 | 0.319804865 | -0.70315  | 4.01E-06 | hypomethylated |
| cg12126243 | 0.82431 | 0.506290811 | -0.703221 | 1.28E-05 | hypomethylated |
| cg05729490 | 0.54635 | 0.335567027 | -0.703224 | 3.07E-05 | hypomethylated |
| cg19889066 | 0.60492 | 0.371454595 | -0.703558 | 0.000563 | hypomethylated |
| cg03537386 | 0.80711 | 0.495572973 | -0.703668 | 2.57E-05 | hypomethylated |
| cg00950497 | 0.50384 | 0.309301622 | -0.703951 | 0.002455 | hypomethylated |
| cg06329491 | 0.32528 | 0.199674054 | -0.704035 | 0.000245 | hypomethylated |
| cg12176793 | 0.67639 | 0.415181081 | -0.704115 | 1.90E-06 | hypomethylated |
| cg27559399 | 0.33451 | 0.205308649 | -0.704255 | 6.08E-05 | hypomethylated |
| cg00792251 | 0.75536 | 0.463557297 | -0.704417 | 4.24E-06 | hypomethylated |
| cg06834177 | 0.925   | 0.567566486 | -0.704664 | 3.21E-06 | hypomethylated |
| cg23090603 | 0.38337 | 0.235224324 | -0.7047   | 0.002599 | hypomethylated |
| cg09043518 | 0.77327 | 0.47441027  | -0.704837 | 1.82E-06 | hypomethylated |
| cg20457051 | 0.84879 | 0.520714054 | -0.704916 | 6.05E-06 | hypomethylated |
| cg23314364 | 0.69374 | 0.425591892 | -0.704924 | 0.000274 | hypomethylated |
| cg17680767 | 0.72495 | 0.44472973  | -0.704953 | 5.58E-05 | hypomethylated |
| cg07965110 | 0.64107 | 0.393258378 | -0.705004 | 0.000382 | hypomethylated |
| cg05506147 | 0.57758 | 0.354300541 | -0.705047 | 1.50E-05 | hypomethylated |
| cg08426898 | 0.75342 | 0.462003784 | -0.70555  | 2.92E-05 | hypomethylated |
| cg09888283 | 0.464   | 0.284490811 | -0.705743 | 0.000159 | hypomethylated |
| cg03891318 | 0.63321 | 0.388237297 | -0.705745 | 8.60E-06 | hypomethylated |
| cg14177914 | 0.48355 | 0.296436757 | -0.705941 | 8.63E-05 | hypomethylated |
| cg26601073 | 0.53623 | 0.328723243 | -0.705978 | 6.95E-05 | hypomethylated |
| cg11134430 | 0.36246 | 0.222181622 | -0.706082 | 0.00078  | hypomethylated |
| cg05501617 | 0.70446 | 0.431677297 | -0.706565 | 8.42E-05 | hypomethylated |
| cg21983531 | 0.67529 | 0.413791351 | -0.706604 | 7.47E-05 | hypomethylated |
| cg21761639 | 0.35545 | 0.217793514 | -0.706686 | 0.000399 | hypomethylated |
| cg08887327 | 0.42702 | 0.261638919 | -0.706726 | 0.000256 | hypomethylated |
| cg09187338 | 0.65662 | 0.402316216 | -0.706729 | 5.72E-05 | hypomethylated |
| cg26250989 | 0.76662 | 0.469679459 | -0.706835 | 1.67E-06 | hypomethylated |
| cg07948480 | 0.70286 | 0.430486486 | -0.707269 | 3.15E-05 | hypomethylated |
| cg00502597 | 0.55798 | 0.341675135 | -0.707588 | 6.31E-05 | hypomethylated |
| cg02965295 | 0.70394 | 0.431045405 | -0.707613 | 0.000112 | hypomethylated |
| cg01550445 | 0.63734 | 0.39024     | -0.707702 | 1.35E-05 | hypomethylated |
| cg09555736 | 0.56873 | 0.348189189 | -0.707872 | 0.000195 | hypomethylated |
| cg08428188 | 0.80158 | 0.490694595 | -0.708021 | 1.09E-05 | hypomethylated |

|            |         |             |           |          |                |
|------------|---------|-------------|-----------|----------|----------------|
| cg23903588 | 0.68285 | 0.41782973  | -0.708654 | 1.22E-06 | hypomethylated |
| cg26534425 | 0.47422 | 0.290132432 | -0.708845 | 4.15E-05 | hypomethylated |
| cg04756223 | 0.62736 | 0.383814595 | -0.708884 | 0.000115 | hypomethylated |
| cg23512231 | 0.77417 | 0.473576757 | -0.709052 | 5.72E-05 | hypomethylated |
| cg11637968 | 0.62586 | 0.382824324 | -0.709157 | 0.000358 | hypomethylated |
| cg14439572 | 0.37721 | 0.230711351 | -0.709279 | 0.001481 | hypomethylated |
| cg21860675 | 0.74975 | 0.458544865 | -0.709347 | 6.05E-06 | hypomethylated |
| cg04177251 | 0.56813 | 0.34742973  | -0.7095   | 0.000365 | hypomethylated |
| cg21462844 | 0.52586 | 0.321555135 | -0.709613 | 0.000135 | hypomethylated |
| cg25133376 | 0.51841 | 0.316991892 | -0.709648 | 0.001603 | hypomethylated |
| cg13257690 | 0.75263 | 0.460207568 | -0.709656 | 5.32E-05 | hypomethylated |
| cg07277633 | 0.3028  | 0.185126486 | -0.709854 | 0.000681 | hypomethylated |
| cg00316800 | 0.76254 | 0.466078378 | -0.71024  | 9.07E-06 | hypomethylated |
| cg24425972 | 0.73788 | 0.450959459 | -0.710388 | 1.21E-05 | hypomethylated |
| cg09942743 | 0.51373 | 0.313963243 | -0.710415 | 5.31E-05 | hypomethylated |
| cg13966557 | 0.55336 | 0.338134595 | -0.710621 | 1.12E-05 | hypomethylated |
| cg11288831 | 0.60501 | 0.369671892 | -0.710714 | 2.21E-05 | hypomethylated |
| cg22482700 | 0.57653 | 0.352260541 | -0.710753 | 2.95E-06 | hypomethylated |
| cg06333233 | 0.70563 | 0.431132973 | -0.710779 | 6.15E-05 | hypomethylated |
| cg22764374 | 0.52619 | 0.321442162 | -0.711025 | 0.002965 | hypomethylated |
| cg26870745 | 0.44375 | 0.271080541 | -0.711026 | 0.000931 | hypomethylated |
| cg06250720 | 0.77429 | 0.472955135 | -0.711171 | 1.62E-05 | hypomethylated |
| cg19017553 | 0.64787 | 0.395722162 | -0.711216 | 1.89E-05 | hypomethylated |
| cg08349497 | 0.58689 | 0.358447027 | -0.71133  | 0.001839 | hypomethylated |
| cg13859639 | 0.42875 | 0.261825405 | -0.711532 | 0.000403 | hypomethylated |
| cg23516310 | 0.5481  | 0.334649189 | -0.71179  | 0.000696 | hypomethylated |
| cg01152624 | 0.41176 | 0.251374054 | -0.711968 | 0.000551 | hypomethylated |
| cg00685614 | 0.91455 | 0.558279459 | -0.712075 | 4.36E-06 | hypomethylated |
| cg25109721 | 0.5624  | 0.343219459 | -0.712465 | 0.004326 | hypomethylated |
| cg18324583 | 0.72162 | 0.440287027 | -0.712795 | 7.93E-06 | hypomethylated |
| cg18021623 | 0.67482 | 0.411696216 | -0.712923 | 1.15E-05 | hypomethylated |
| cg08079052 | 0.51635 | 0.314962703 | -0.713168 | 0.000805 | hypomethylated |
| cg01858698 | 0.53917 | 0.328881622 | -0.713172 | 0.002106 | hypomethylated |
| cg08494738 | 0.72699 | 0.443399459 | -0.713329 | 1.62E-05 | hypomethylated |
| cg02398682 | 0.36822 | 0.224567568 | -0.713418 | 0.001603 | hypomethylated |
| cg12279294 | 0.3764  | 0.229552432 | -0.713443 | 0.001107 | hypomethylated |
| cg18413830 | 0.68809 | 0.419575135 | -0.713668 | 1.18E-05 | hypomethylated |
| cg01910639 | 0.54167 | 0.33020973  | -0.714032 | 1.62E-05 | hypomethylated |
| cg19111408 | 0.45018 | 0.274433514 | -0.714045 | 0.001423 | hypomethylated |
| cg08376992 | 0.42278 | 0.257717297 | -0.714118 | 0.000287 | hypomethylated |
| cg03501666 | 0.60123 | 0.366460541 | -0.714259 | 0.000912 | hypomethylated |
| cg07775417 | 0.61685 | 0.375977838 | -0.714272 | 8.83E-06 | hypomethylated |
| cg03354616 | 0.83282 | 0.507609189 | -0.714287 | 6.75E-06 | hypomethylated |
| cg13817046 | 0.66223 | 0.403622162 | -0.714327 | 1.89E-05 | hypomethylated |
| cg27484412 | 0.5395  | 0.328813514 | -0.714353 | 0.003705 | hypomethylated |
| cg14032261 | 0.71932 | 0.438397297 | -0.714395 | 2.27E-05 | hypomethylated |
| cg03108070 | 0.57443 | 0.350067568 | -0.714498 | 0.006915 | hypomethylated |
| cg16929739 | 0.67493 | 0.411306486 | -0.714524 | 5.19E-05 | hypomethylated |
| cg12846656 | 0.42751 | 0.260517838 | -0.714576 | 0.005131 | hypomethylated |
| cg07588216 | 0.83977 | 0.511680541 | -0.714751 | 2.23E-06 | hypomethylated |
| cg24816455 | 0.52548 | 0.320178378 | -0.71476  | 0.000417 | hypomethylated |
| cg22905866 | 0.69004 | 0.420318919 | -0.715196 | 9.57E-06 | hypomethylated |
| cg26978064 | 0.46863 | 0.285451351 | -0.715204 | 5.50E-06 | hypomethylated |
| cg00160981 | 0.54596 | 0.332502162 | -0.715432 | 0.000214 | hypomethylated |
| cg02824980 | 0.41594 | 0.253310811 | -0.715467 | 0.000152 | hypomethylated |
| cg15013617 | 0.56661 | 0.34506973  | -0.715468 | 0.000588 | hypomethylated |
| cg07875068 | 0.45165 | 0.275045405 | -0.715535 | 4.26E-05 | hypomethylated |
| cg10250177 | 0.43955 | 0.267671892 | -0.715562 | 3.62E-05 | hypomethylated |



|            |         |             |           |          |                |
|------------|---------|-------------|-----------|----------|----------------|
| cg24836281 | 0.59579 | 0.362765946 | -0.715765 | 3.07E-05 | hypomethylated |
| cg27282397 | 0.6914  | 0.420964324 | -0.715823 | 2.78E-05 | hypomethylated |
| cg25744552 | 0.42846 | 0.260855676 | -0.715909 | 2.71E-05 | hypomethylated |
| cg07080653 | 0.72571 | 0.441800541 | -0.715998 | 3.67E-05 | hypomethylated |
| cg13784312 | 0.59097 | 0.359746486 | -0.716104 | 0.000426 | hypomethylated |
| cg07763231 | 0.4681  | 0.284935135 | -0.716183 | 8.42E-05 | hypomethylated |
| cg11316887 | 0.55314 | 0.336669189 | -0.716313 | 6.75E-06 | hypomethylated |
| cg03213374 | 0.51273 | 0.31205027  | -0.716421 | 0.003878 | hypomethylated |
| cg16989719 | 0.68016 | 0.413916216 | -0.716535 | 5.32E-05 | hypomethylated |
| cg05312104 | 0.51291 | 0.312131892 | -0.71655  | 1.21E-05 | hypomethylated |
| cg00761125 | 0.73649 | 0.448158378 | -0.716657 | 0.000178 | hypomethylated |
| cg10134799 | 0.71975 | 0.437907027 | -0.716871 | 5.58E-06 | hypomethylated |
| cg17696194 | 0.43323 | 0.263461081 | -0.717543 | 0.000195 | hypomethylated |
| cg26546105 | 0.23231 | 0.141264324 | -0.717654 | 0.0017   | hypomethylated |
| cg25581222 | 0.6731  | 0.409283243 | -0.717721 | 0.000445 | hypomethylated |
| cg02149069 | 0.48689 | 0.296052432 | -0.717743 | 7.56E-05 | hypomethylated |
| cg11493223 | 0.49566 | 0.301375676 | -0.717788 | 0.002106 | hypomethylated |
| cg16714154 | 0.51621 | 0.313777297 | -0.718217 | 0.000626 | hypomethylated |
| cg20658466 | 0.31576 | 0.191914054 | -0.718368 | 2.21E-05 | hypomethylated |
| cg26314722 | 0.45277 | 0.275172973 | -0.71844  | 0.001734 | hypomethylated |
| cg24988684 | 0.47177 | 0.286692432 | -0.71858  | 0.000517 | hypomethylated |
| cg08779649 | 0.68998 | 0.419258919 | -0.718713 | 8.84E-05 | hypomethylated |
| cg17758048 | 0.74542 | 0.452886486 | -0.718904 | 4.42E-05 | hypomethylated |
| cg04910041 | 0.57121 | 0.34700973  | -0.719045 | 0.000464 | hypomethylated |
| cg17494199 | 0.65021 | 0.394956216 | -0.719213 | 2.85E-05 | hypomethylated |
| cg08599635 | 0.65128 | 0.395573514 | -0.719332 | 0.000912 | hypomethylated |
| cg14695663 | 0.44417 | 0.26973027  | -0.719595 | 0.001803 | hypomethylated |
| cg03916189 | 0.42764 | 0.259628649 | -0.719947 | 0.000195 | hypomethylated |
| cg12392104 | 0.56453 | 0.342719459 | -0.720022 | 0.00099  | hypomethylated |
| cg00516092 | 0.58467 | 0.354905405 | -0.720188 | 3.76E-05 | hypomethylated |
| cg24367957 | 0.61582 | 0.373762703 | -0.720386 | 0.00064  | hypomethylated |
| cg10037049 | 0.53015 | 0.321744865 | -0.720483 | 0.000459 | hypomethylated |
| cg17318719 | 0.6091  | 0.369634054 | -0.720581 | 3.23E-05 | hypomethylated |
| cg21994818 | 0.63891 | 0.387652973 | -0.720847 | 0.000107 | hypomethylated |
| cg08374799 | 0.46319 | 0.281032432 | -0.720867 | 0.00095  | hypomethylated |
| cg19009471 | 0.64956 | 0.394024324 | -0.721178 | 0.000772 | hypomethylated |
| cg12251111 | 0.75085 | 0.455326486 | -0.721623 | 3.69E-06 | hypomethylated |
| cg08908264 | 0.41963 | 0.254465405 | -0.721648 | 0.001717 | hypomethylated |
| cg16677191 | 0.63867 | 0.387224324 | -0.721901 | 0.000674 | hypomethylated |
| cg11316517 | 0.7386  | 0.447737838 | -0.722139 | 4.26E-05 | hypomethylated |
| cg16417118 | 0.47294 | 0.286658378 | -0.722325 | 0.000142 | hypomethylated |
| cg26311501 | 0.56245 | 0.340897297 | -0.722388 | 8.32E-05 | hypomethylated |
| cg00763594 | 0.59716 | 0.361933514 | -0.722393 | 1.12E-05 | hypomethylated |
| cg03930313 | 0.63447 | 0.384545405 | -0.722398 | 0.000234 | hypomethylated |
| cg05778494 | 0.60054 | 0.363975135 | -0.72242  | 2.04E-05 | hypomethylated |
| cg11918450 | 0.76785 | 0.465374054 | -0.722434 | 1.80E-05 | hypomethylated |
| cg11667061 | 0.69169 | 0.419209189 | -0.722455 | 0.000256 | hypomethylated |
| cg15551096 | 0.55736 | 0.337716757 | -0.722796 | 0.012844 | hypomethylated |
| cg27341866 | 0.92735 | 0.561813514 | -0.723023 | 5.72E-05 | hypomethylated |
| cg07329251 | 0.58306 | 0.353226486 | -0.723051 | 0.000262 | hypomethylated |
| cg02341503 | 0.36329 | 0.219990811 | -0.723678 | 0.000772 | hypomethylated |
| cg21226735 | 0.69398 | 0.420204324 | -0.723803 | 3.39E-06 | hypomethylated |
| cg26165146 | 0.7699  | 0.466052973 | -0.724177 | 4.82E-05 | hypomethylated |
| cg10100887 | 0.62086 | 0.375812973 | -0.724253 | 3.49E-06 | hypomethylated |
| cg18773937 | 0.47585 | 0.288023784 | -0.724319 | 0.005656 | hypomethylated |
| cg04830629 | 0.44396 | 0.268663784 | -0.724628 | 0.00012  | hypomethylated |
| cg09232805 | 0.49953 | 0.302192432 | -0.725104 | 9.05E-05 | hypomethylated |
| cg07507251 | 0.4585  | 0.277368649 | -0.725117 | 0.000875 | hypomethylated |

|            |         |             |           |          |                |
|------------|---------|-------------|-----------|----------|----------------|
| cg02601475 | 0.67498 | 0.408258378 | -0.725362 | 0.000306 | hypomethylated |
| cg13005202 | 0.60516 | 0.366001081 | -0.725469 | 0.000268 | hypomethylated |
| cg08275025 | 0.4457  | 0.269482703 | -0.72588  | 0.004059 | hypomethylated |
| cg01635061 | 0.24639 | 0.148956216 | -0.726055 | 0.002856 | hypomethylated |
| cg25632577 | 0.86217 | 0.521176216 | -0.726201 | 2.57E-06 | hypomethylated |
| cg03604067 | 0.63762 | 0.385432973 | -0.726217 | 0.001237 | hypomethylated |
| cg22670759 | 0.47256 | 0.285648108 | -0.726259 | 0.002478 | hypomethylated |
| cg27236629 | 0.46679 | 0.282114054 | -0.726495 | 8.13E-05 | hypomethylated |
| cg27092248 | 0.62999 | 0.380739459 | -0.726525 | 2.54E-05 | hypomethylated |
| cg19982230 | 0.45535 | 0.275181622 | -0.726592 | 0.000667 | hypomethylated |
| cg18098065 | 0.47682 | 0.288080541 | -0.726973 | 0.004485 | hypomethylated |
| cg02064267 | 0.42919 | 0.259224324 | -0.727415 | 0.000313 | hypomethylated |
| cg12491643 | 0.77435 | 0.46767027  | -0.727494 | 3.40E-05 | hypomethylated |
| cg15208197 | 0.34796 | 0.210121081 | -0.727701 | 3.04E-06 | hypomethylated |
| cg11807006 | 0.48    | 0.289790811 | -0.728023 | 0.001301 | hypomethylated |
| cg17232357 | 0.55256 | 0.333595135 | -0.728033 | 1.21E-05 | hypomethylated |
| cg00952054 | 0.78773 | 0.475522162 | -0.728189 | 0.000109 | hypomethylated |
| cg26962618 | 0.63606 | 0.383955676 | -0.728223 | 0.00039  | hypomethylated |
| cg02511456 | 0.35375 | 0.21352     | -0.728359 | 0.000166 | hypomethylated |
| cg16755214 | 0.61144 | 0.369054054 | -0.728379 | 3.85E-05 | hypomethylated |
| cg12622958 | 0.31151 | 0.188021622 | -0.72838  | 0.000234 | hypomethylated |
| cg05167973 | 0.47513 | 0.286776757 | -0.728394 | 0.001074 | hypomethylated |
| cg24333189 | 0.4446  | 0.268282162 | -0.728757 | 0.000152 | hypomethylated |
| cg11784887 | 0.44522 | 0.268655135 | -0.728763 | 0.000726 | hypomethylated |
| cg17346857 | 0.42579 | 0.25692973  | -0.728768 | 0.006015 | hypomethylated |
| cg14416623 | 0.59442 | 0.358641622 | -0.72894  | 0.00134  | hypomethylated |
| cg06160973 | 0.4782  | 0.288516216 | -0.728962 | 0.000354 | hypomethylated |
| cg13800005 | 0.69926 | 0.421888649 | -0.728967 | 0.000195 | hypomethylated |
| cg01815912 | 0.52612 | 0.317409189 | -0.729048 | 1.35E-05 | hypomethylated |
| cg22066894 | 0.56964 | 0.343662703 | -0.729057 | 0.002599 | hypomethylated |
| cg25818214 | 0.48833 | 0.294525946 | -0.729462 | 0.000116 | hypomethylated |
| cg17298925 | 0.5606  | 0.338070811 | -0.729646 | 0.003914 | hypomethylated |
| cg01513078 | 0.69999 | 0.422083243 | -0.729807 | 1.75E-05 | hypomethylated |
| cg00036347 | 0.45171 | 0.272364324 | -0.729859 | 0.001875 | hypomethylated |
| cg09896544 | 0.44313 | 0.267179459 | -0.729921 | 6.62E-05 | hypomethylated |
| cg13279476 | 0.5165  | 0.311394054 | -0.730027 | 0.000653 | hypomethylated |
| cg26575450 | 0.56346 | 0.339636216 | -0.730323 | 0.005706 | hypomethylated |
| cg15033552 | 0.7748  | 0.467009189 | -0.730373 | 1.84E-05 | hypomethylated |
| cg19145082 | 0.60696 | 0.365724865 | -0.730843 | 0.000166 | hypomethylated |
| cg14212038 | 0.50833 | 0.306287027 | -0.730881 | 6.15E-05 | hypomethylated |
| cg23704195 | 0.57806 | 0.348251892 | -0.731088 | 1.89E-05 | hypomethylated |
| cg16270485 | 0.50733 | 0.305628649 | -0.731145 | 0.000287 | hypomethylated |
| cg19773937 | 0.75476 | 0.454615676 | -0.731371 | 1.94E-05 | hypomethylated |
| cg16163382 | 0.62345 | 0.375522162 | -0.731376 | 0.000306 | hypomethylated |
| cg11961138 | 0.40599 | 0.24436973  | -0.732379 | 0.00099  | hypomethylated |
| cg09298313 | 0.427   | 0.256959459 | -0.732695 | 0.000306 | hypomethylated |
| cg16429725 | 0.59005 | 0.35507027  | -0.732733 | 2.07E-05 | hypomethylated |
| cg04510459 | 0.49489 | 0.297796216 | -0.732782 | 0.000112 | hypomethylated |
| cg20289045 | 0.70495 | 0.424115676 | -0.733063 | 2.92E-05 | hypomethylated |
| cg08928408 | 0.55074 | 0.331301081 | -0.733228 | 0.000303 | hypomethylated |
| cg14241836 | 0.7597  | 0.456985946 | -0.73328  | 0.000123 | hypomethylated |
| cg22691256 | 0.66421 | 0.399488108 | -0.733487 | 1.80E-05 | hypomethylated |
| cg25968076 | 0.32721 | 0.196755135 | -0.733816 | 0.000242 | hypomethylated |
| cg26690592 | 0.23029 | 0.138434595 | -0.734247 | 0.000382 | hypomethylated |
| cg19861260 | 0.49536 | 0.297767568 | -0.734291 | 0.000696 | hypomethylated |
| cg06808585 | 0.38915 | 0.233922162 | -0.734298 | 0.000127 | hypomethylated |
| cg00184457 | 0.59771 | 0.359278378 | -0.734344 | 0.001571 | hypomethylated |
| cg16209064 | 0.81738 | 0.491315135 | -0.734358 | 4.48E-06 | hypomethylated |

|                |         |             |           |          |                |
|----------------|---------|-------------|-----------|----------|----------------|
| cg00073460     | 0.57267 | 0.344213514 | -0.7344   | 0.0002   | hypomethylated |
| cg21513352     | 0.35568 | 0.213786486 | -0.734409 | 0.001526 | hypomethylated |
| cg04468741     | 0.76598 | 0.460364865 | -0.734529 | 1.80E-05 | hypomethylated |
| cg04212150     | 0.3379  | 0.20308     | -0.734548 | 0.001635 | hypomethylated |
| cg00424451     | 0.46921 | 0.281964324 | -0.734721 | 0.000115 | hypomethylated |
| cg03821121     | 0.68133 | 0.409308108 | -0.735166 | 9.49E-05 | hypomethylated |
| cg16434331     | 0.60322 | 0.362383243 | -0.735168 | 0.000268 | hypomethylated |
| cg20488673     | 0.59383 | 0.356684324 | -0.735402 | 0.000287 | hypomethylated |
| ch.2.20642108R | 0.31529 | 0.18936     | -0.735548 | 0.001041 | hypomethylated |
| cg05279738     | 0.62405 | 0.374760541 | -0.735693 | 1.80E-05 | hypomethylated |
| cg20911180     | 0.65408 | 0.392763784 | -0.735805 | 0.001301 | hypomethylated |
| cg01781725     | 0.32426 | 0.194703243 | -0.735874 | 6.01E-05 | hypomethylated |
| cg17799287     | 0.49424 | 0.296587568 | -0.736754 | 0.000317 | hypomethylated |
| cg08698997     | 0.45587 | 0.27354     | -0.736871 | 0.000893 | hypomethylated |
| cg12377816     | 0.41443 | 0.248673514 | -0.736876 | 6.78E-05 | hypomethylated |
| cg00339782     | 0.64268 | 0.385578919 | -0.737074 | 6.75E-06 | hypomethylated |
| cg11778563     | 0.39977 | 0.239841622 | -0.737088 | 0.003506 | hypomethylated |
| cg04324821     | 0.38692 | 0.232073514 | -0.737453 | 0.00291  | hypomethylated |
| cg14939821     | 0.64344 | 0.385872973 | -0.73768  | 0.0006   | hypomethylated |
| cg25336892     | 0.72083 | 0.43218973  | -0.737994 | 8.15E-06 | hypomethylated |
| cg17260706     | 0.36423 | 0.218289189 | -0.738609 | 3.67E-05 | hypomethylated |
| cg26550194     | 0.60207 | 0.360779459 | -0.738814 | 0.000129 | hypomethylated |
| cg20629315     | 0.6943  | 0.415944324 | -0.739169 | 0.000191 | hypomethylated |
| cg04322486     | 0.45917 | 0.275064324 | -0.739259 | 0.001212 | hypomethylated |
| cg27543334     | 0.31202 | 0.186894595 | -0.739414 | 0.000733 | hypomethylated |
| cg07340025     | 0.50426 | 0.302020541 | -0.739521 | 0.003441 | hypomethylated |
| cg16308270     | 0.66035 | 0.395494595 | -0.739573 | 8.15E-06 | hypomethylated |
| cg26203572     | 0.84902 | 0.508487568 | -0.739586 | 1.01E-05 | hypomethylated |
| cg19791637     | 0.69269 | 0.414766486 | -0.739911 | 1.15E-05 | hypomethylated |
| cg02747950     | 0.60126 | 0.360016216 | -0.739927 | 0.000209 | hypomethylated |
| cg12422154     | 0.7098  | 0.424997297 | -0.739959 | 3.30E-06 | hypomethylated |
| cg20359363     | 0.46454 | 0.278139459 | -0.739994 | 2.30E-05 | hypomethylated |
| cg04031093     | 0.71908 | 0.430523243 | -0.740061 | 6.95E-05 | hypomethylated |
| cg19676285     | 0.54935 | 0.328886486 | -0.740136 | 2.04E-05 | hypomethylated |
| cg22813430     | 0.44832 | 0.268366486 | -0.740324 | 0.00028  | hypomethylated |
| cg14370448     | 0.38736 | 0.231857838 | -0.740434 | 0.002007 | hypomethylated |
| cg14854503     | 0.71687 | 0.429085405 | -0.740447 | 0.000137 | hypomethylated |
| cg15876968     | 0.35479 | 0.212357297 | -0.740472 | 0.000426 | hypomethylated |
| cg15756114     | 0.59342 | 0.355183243 | -0.74049  | 8.42E-05 | hypomethylated |
| cg08035555     | 0.56286 | 0.336779459 | -0.740972 | 0.000506 | hypomethylated |
| cg26158270     | 0.69828 | 0.417723243 | -0.741258 | 1.54E-05 | hypomethylated |
| cg08554554     | 0.57354 | 0.343083784 | -0.741333 | 0.000178 | hypomethylated |
| cg24174557     | 0.53868 | 0.322136757 | -0.741755 | 0.002699 | hypomethylated |
| cg12549411     | 0.43567 | 0.260525946 | -0.741809 | 0.000667 | hypomethylated |
| cg08428292     | 0.57633 | 0.34463027  | -0.741846 | 0.0017   | hypomethylated |
| cg18458509     | 0.60643 | 0.362613514 | -0.741908 | 0.00096  | hypomethylated |
| cg20515580     | 0.5057  | 0.302382162 | -0.741909 | 0.000327 | hypomethylated |
| cg07830472     | 0.73254 | 0.438004865 | -0.741961 | 1.82E-05 | hypomethylated |
| cg00159243     | 0.57949 | 0.346458378 | -0.742102 | 0.002455 | hypomethylated |
| cg24995678     | 0.74567 | 0.445716216 | -0.742412 | 0.000142 | hypomethylated |
| cg20545458     | 0.5369  | 0.320877297 | -0.742632 | 0.000293 | hypomethylated |
| cg11761483     | 0.63488 | 0.379403784 | -0.74275  | 0.000653 | hypomethylated |
| cg23954655     | 0.40985 | 0.244878378 | -0.743031 | 0.000224 | hypomethylated |
| cg01300291     | 0.32637 | 0.19498     | -0.743182 | 0.000182 | hypomethylated |
| cg26687579     | 0.40602 | 0.242523784 | -0.743425 | 5.07E-06 | hypomethylated |
| cg02505956     | 0.84981 | 0.507604865 | -0.743434 | 2.57E-06 | hypomethylated |
| cg16542322     | 0.3837  | 0.229183784 | -0.743474 | 0.000464 | hypomethylated |
| cg18608055     | 0.59391 | 0.354726486 | -0.743537 | 0.000256 | hypomethylated |

|            |         |             |           |          |                |
|------------|---------|-------------|-----------|----------|----------------|
| cg18661868 | 0.34979 | 0.208901081 | -0.743669 | 0.00134  | hypomethylated |
| cg14074117 | 0.61233 | 0.365574054 | -0.744146 | 3.00E-05 | hypomethylated |
| cg24618514 | 0.42528 | 0.253879459 | -0.744269 | 0.002026 | hypomethylated |
| cg10324998 | 0.2773  | 0.165535135 | -0.74431  | 5.65E-05 | hypomethylated |
| cg20445727 | 0.78259 | 0.467030811 | -0.744739 | 5.00E-06 | hypomethylated |
| cg04312209 | 0.38263 | 0.228343784 | -0.744742 | 0.000204 | hypomethylated |
| cg25247520 | 0.77893 | 0.464826486 | -0.744801 | 8.42E-05 | hypomethylated |
| cg27326514 | 0.58923 | 0.351574054 | -0.745002 | 0.000185 | hypomethylated |
| cg12840818 | 0.44462 | 0.265247568 | -0.745233 | 1.26E-05 | hypomethylated |
| cg02142926 | 0.44928 | 0.268001081 | -0.745376 | 4.70E-05 | hypomethylated |
| cg11998200 | 0.54537 | 0.325268108 | -0.745606 | 0.00094  | hypomethylated |
| cg14607660 | 0.62984 | 0.375627568 | -0.745682 | 1.18E-05 | hypomethylated |
| cg17375585 | 0.50177 | 0.29921027  | -0.745867 | 0.000399 | hypomethylated |
| cg00590817 | 0.56875 | 0.339115676 | -0.746017 | 0.000268 | hypomethylated |
| cg16411857 | 0.37591 | 0.224098919 | -0.746252 | 0.006395 | hypomethylated |
| cg25296938 | 0.54742 | 0.326334595 | -0.746296 | 0.00513  | hypomethylated |
| cg19050555 | 0.80435 | 0.479476757 | -0.746363 | 4.58E-05 | hypomethylated |
| cg02107844 | 0.50309 | 0.299868108 | -0.746488 | 0.000207 | hypomethylated |
| cg09920804 | 0.56635 | 0.33752973  | -0.746679 | 3.12E-06 | hypomethylated |
| cg17052170 | 0.63357 | 0.377397297 | -0.74742  | 9.95E-05 | hypomethylated |
| cg24820936 | 0.54036 | 0.321758919 | -0.747941 | 0.001949 | hypomethylated |
| cg26271591 | 0.44044 | 0.262239459 | -0.748061 | 0.003225 | hypomethylated |
| cg23350385 | 0.732   | 0.435764324 | -0.748296 | 6.95E-05 | hypomethylated |
| cg01441777 | 0.43659 | 0.259877838 | -0.748445 | 0.000129 | hypomethylated |
| cg18842353 | 0.30474 | 0.181345946 | -0.748834 | 0.000117 | hypomethylated |
| cg21650866 | 0.46915 | 0.279176216 | -0.748873 | 0.00095  | hypomethylated |
| cg18082515 | 0.44832 | 0.266760541 | -0.748984 | 0.000245 | hypomethylated |
| cg06422467 | 0.48389 | 0.287863784 | -0.749293 | 0.000142 | hypomethylated |
| cg05117982 | 0.41875 | 0.249111351 | -0.749298 | 0.001314 | hypomethylated |
| cg00058887 | 0.60137 | 0.357747568 | -0.749311 | 2.89E-05 | hypomethylated |
| cg13942186 | 0.38028 | 0.226203243 | -0.749442 | 0.001368 | hypomethylated |
| cg09229893 | 0.63069 | 0.375137297 | -0.749512 | 0.000327 | hypomethylated |
| cg10950358 | 0.31741 | 0.188795676 | -0.749522 | 0.000209 | hypomethylated |
| cg08824847 | 0.59047 | 0.35115027  | -0.749775 | 5.86E-05 | hypomethylated |
| cg14550985 | 0.51097 | 0.303861081 | -0.749827 | 0.000123 | hypomethylated |
| cg26541218 | 0.54682 | 0.325159459 | -0.749919 | 0.00024  | hypomethylated |
| cg17583957 | 0.86938 | 0.516926486 | -0.750028 | 9.38E-07 | hypomethylated |
| cg06126421 | 0.58529 | 0.347977838 | -0.750156 | 6.15E-05 | hypomethylated |
| cg06278108 | 0.37479 | 0.22282     | -0.750204 | 0.000209 | hypomethylated |
| cg05152300 | 0.48477 | 0.288187027 | -0.750295 | 0.000756 | hypomethylated |
| cg09958560 | 0.65562 | 0.389696216 | -0.75051  | 0.000191 | hypomethylated |
| cg15298059 | 0.30519 | 0.181368108 | -0.750787 | 0.000209 | hypomethylated |
| cg09108532 | 0.38533 | 0.228975135 | -0.750904 | 3.59E-06 | hypomethylated |
| cg08866794 | 0.60152 | 0.357423784 | -0.750977 | 0.000166 | hypomethylated |
| cg00523604 | 0.52814 | 0.313815135 | -0.751005 | 0.000408 | hypomethylated |
| cg07773593 | 0.42821 | 0.254435676 | -0.751018 | 0.001031 | hypomethylated |
| cg02595280 | 0.41385 | 0.245891892 | -0.751084 | 0.008783 | hypomethylated |
| cg17631150 | 0.45369 | 0.269557297 | -0.751115 | 4.36E-05 | hypomethylated |
| cg06606386 | 0.55397 | 0.329116216 | -0.751211 | 0.0017   | hypomethylated |
| cg03504039 | 0.4772  | 0.283472432 | -0.751386 | 2.61E-05 | hypomethylated |
| cg10142520 | 0.64854 | 0.385103784 | -0.751948 | 0.003773 | hypomethylated |
| cg02349468 | 0.81517 | 0.484048649 | -0.751949 | 5.21E-06 | hypomethylated |
| cg18798289 | 0.53765 | 0.319204865 | -0.752185 | 0.003136 | hypomethylated |
| cg02632362 | 0.50302 | 0.29863027  | -0.752255 | 0.003195 | hypomethylated |
| cg00044372 | 0.78868 | 0.468162703 | -0.75243  | 1.72E-06 | hypomethylated |
| cg23466749 | 0.52865 | 0.313807568 | -0.752433 | 0.000216 | hypomethylated |
| cg25124300 | 0.70752 | 0.419891892 | -0.752753 | 5.58E-05 | hypomethylated |
| cg26839512 | 0.35816 | 0.212502703 | -0.753123 | 0.001667 | hypomethylated |

|            |         |             |           |          |                |
|------------|---------|-------------|-----------|----------|----------------|
| cg19543867 | 0.80091 | 0.475062162 | -0.753524 | 4.36E-06 | hypomethylated |
| cg24687805 | 0.42034 | 0.249306486 | -0.753636 | 0.007035 | hypomethylated |
| cg17290213 | 0.49189 | 0.291732973 | -0.753687 | 0.001118 | hypomethylated |
| cg19767205 | 0.54367 | 0.322422703 | -0.753778 | 6.78E-05 | hypomethylated |
| cg19867107 | 0.57113 | 0.338687568 | -0.753864 | 0.006339 | hypomethylated |
| cg05191397 | 0.42885 | 0.254277838 | -0.754067 | 0.001288 | hypomethylated |
| cg19821297 | 0.59342 | 0.351804324 | -0.75428  | 0.00012  | hypomethylated |
| cg11278749 | 0.73287 | 0.434447027 | -0.754377 | 2.45E-05 | hypomethylated |
| cg02854902 | 0.81665 | 0.484079459 | -0.754474 | 7.72E-06 | hypomethylated |
| cg01421539 | 0.23295 | 0.138062162 | -0.754702 | 0.000335 | hypomethylated |
| cg19845249 | 0.34648 | 0.205338378 | -0.754769 | 0.001511 | hypomethylated |
| cg10437931 | 0.59841 | 0.354617838 | -0.754869 | 0.000219 | hypomethylated |
| cg09740450 | 0.43937 | 0.260326486 | -0.755114 | 5.58E-06 | hypomethylated |
| cg11838152 | 0.49536 | 0.293495676 | -0.755138 | 0.00255  | hypomethylated |
| cg01786048 | 0.59963 | 0.355203784 | -0.755426 | 0.000653 | hypomethylated |
| cg15858483 | 0.49852 | 0.295308108 | -0.75543  | 0.001511 | hypomethylated |
| cg25628433 | 0.41912 | 0.248255676 | -0.755537 | 4.31E-05 | hypomethylated |
| cg27171194 | 0.37401 | 0.221526486 | -0.755598 | 0.000313 | hypomethylated |
| cg02789515 | 0.82485 | 0.488504865 | -0.755759 | 8.83E-06 | hypomethylated |
| cg19169932 | 0.58108 | 0.344107568 | -0.755877 | 8.63E-05 | hypomethylated |
| cg24127989 | 0.26877 | 0.159135676 | -0.756115 | 0.002274 | hypomethylated |
| cg20627046 | 0.55727 | 0.329865405 | -0.756499 | 4.15E-05 | hypomethylated |
| cg21490635 | 0.55106 | 0.326175135 | -0.756563 | 1.12E-05 | hypomethylated |
| cg07011538 | 0.56948 | 0.336991351 | -0.756934 | 0.000115 | hypomethylated |
| cg15033653 | 0.26265 | 0.155410811 | -0.757055 | 0.000226 | hypomethylated |
| cg18098839 | 0.5033  | 0.297774054 | -0.757201 | 0.003571 | hypomethylated |
| cg11854392 | 0.56653 | 0.335165946 | -0.757277 | 0.00421  | hypomethylated |
| cg24439686 | 0.60612 | 0.35856     | -0.757389 | 0.000674 | hypomethylated |
| cg14329059 | 0.35087 | 0.207535676 | -0.757577 | 0.002147 | hypomethylated |
| cg07863022 | 0.48426 | 0.286418919 | -0.757655 | 0.000653 | hypomethylated |
| cg25962699 | 0.46947 | 0.277627027 | -0.757885 | 4.05E-05 | hypomethylated |
| cg12138695 | 0.2447  | 0.144704865 | -0.757901 | 1.31E-05 | hypomethylated |
| cg15887927 | 0.62748 | 0.370992432 | -0.75818  | 3.95E-05 | hypomethylated |
| cg24402880 | 0.64197 | 0.379548649 | -0.758221 | 0.000262 | hypomethylated |
| cg16172099 | 0.49185 | 0.29077027  | -0.758339 | 0.000613 | hypomethylated |
| cg24450239 | 0.72892 | 0.430751892 | -0.758903 | 7.47E-05 | hypomethylated |
| cg00622799 | 0.48202 | 0.284727568 | -0.759511 | 0.000159 | hypomethylated |
| cg20045394 | 0.42764 | 0.252594054 | -0.759576 | 0.001875 | hypomethylated |
| cg17117459 | 0.67562 | 0.399058378 | -0.759612 | 0.0002   | hypomethylated |
| cg03851496 | 0.29498 | 0.17423027  | -0.759622 | 0.000449 | hypomethylated |
| cg07447769 | 0.62583 | 0.369631351 | -0.759684 | 2.39E-05 | hypomethylated |
| cg13632630 | 0.63122 | 0.372783243 | -0.759806 | 2.71E-05 | hypomethylated |
| cg24904788 | 0.64361 | 0.379886486 | -0.760618 | 0.000435 | hypomethylated |
| cg25432336 | 0.62679 | 0.36994973  | -0.760653 | 9.72E-05 | hypomethylated |
| cg06733329 | 0.28238 | 0.166654595 | -0.760777 | 0.000613 | hypomethylated |
| cg03078551 | 0.28615 | 0.168874595 | -0.760819 | 0.003773 | hypomethylated |
| cg05783290 | 0.44324 | 0.261555676 | -0.76097  | 0.006122 | hypomethylated |
| cg23367358 | 0.67166 | 0.396322703 | -0.761056 | 7.65E-05 | hypomethylated |
| cg20311002 | 0.78115 | 0.460903784 | -0.761134 | 9.82E-06 | hypomethylated |
| cg27285720 | 0.6437  | 0.37979027  | -0.761186 | 0.001395 | hypomethylated |
| cg18758433 | 0.7161  | 0.422430811 | -0.761446 | 0.000182 | hypomethylated |
| cg11610614 | 0.4003  | 0.236120541 | -0.761558 | 0.00591  | hypomethylated |
| cg09449150 | 0.57339 | 0.338204865 | -0.761619 | 9.49E-05 | hypomethylated |
| cg02641539 | 0.45074 | 0.265854595 | -0.761658 | 0.000382 | hypomethylated |
| cg08243465 | 0.56564 | 0.333623243 | -0.761664 | 4.93E-06 | hypomethylated |
| cg23934955 | 0.59811 | 0.352675135 | -0.762071 | 2.10E-05 | hypomethylated |
| cg04270489 | 0.52877 | 0.311734054 | -0.762325 | 5.72E-05 | hypomethylated |
| cg06879394 | 0.67753 | 0.399432973 | -0.762331 | 0.002599 | hypomethylated |

|            |         |             |           |          |                |
|------------|---------|-------------|-----------|----------|----------------|
| cg07956751 | 0.48115 | 0.283641622 | -0.762417 | 0.007158 | hypomethylated |
| cg10778971 | 0.6401  | 0.377302703 | -0.762575 | 2.45E-05 | hypomethylated |
| cg04504205 | 0.45351 | 0.267264865 | -0.762864 | 0.00032  | hypomethylated |
| cg07480754 | 0.30262 | 0.178340541 | -0.762873 | 0.000696 | hypomethylated |
| cg06780032 | 0.48684 | 0.286850811 | -0.763147 | 0.00064  | hypomethylated |
| cg19945931 | 0.76515 | 0.450711351 | -0.763539 | 4.15E-05 | hypomethylated |
| cg24310959 | 0.55534 | 0.327051892 | -0.763852 | 3.23E-05 | hypomethylated |
| cg15132013 | 0.71684 | 0.422103784 | -0.764053 | 1.80E-05 | hypomethylated |
| cg05696969 | 0.77605 | 0.456884865 | -0.764319 | 1.75E-05 | hypomethylated |
| cg18702012 | 0.48867 | 0.287666486 | -0.764463 | 1.64E-05 | hypomethylated |
| cg19267254 | 0.56128 | 0.330327027 | -0.764826 | 0.000159 | hypomethylated |
| cg19236431 | 0.36483 | 0.21470973  | -0.764837 | 0.003166 | hypomethylated |
| cg08056069 | 0.5992  | 0.352626486 | -0.764897 | 0.000293 | hypomethylated |
| cg08409642 | 0.51063 | 0.300425946 | -0.765269 | 0.007158 | hypomethylated |
| cg00375457 | 0.29345 | 0.172648108 | -0.76528  | 0.000884 | hypomethylated |
| cg15916554 | 0.5211  | 0.30652973  | -0.765533 | 0.000166 | hypomethylated |
| cg20513976 | 0.70895 | 0.416983784 | -0.765693 | 0.0003   | hypomethylated |
| cg09315887 | 0.44708 | 0.262938919 | -0.765805 | 0.000653 | hypomethylated |
| cg01714284 | 0.51148 | 0.300804865 | -0.76585  | 0.001141 | hypomethylated |
| cg13427748 | 0.51181 | 0.300929189 | -0.766184 | 0.000626 | hypomethylated |
| cg12386646 | 0.33465 | 0.196743784 | -0.766335 | 0.00031  | hypomethylated |
| cg25565203 | 0.59824 | 0.351708649 | -0.766344 | 1.12E-05 | hypomethylated |
| cg16567330 | 0.47923 | 0.28169027  | -0.766608 | 0.000435 | hypomethylated |
| cg27116114 | 0.76579 | 0.450102703 | -0.766695 | 8.60E-06 | hypomethylated |
| cg13787850 | 0.45212 | 0.265716216 | -0.766819 | 0.00035  | hypomethylated |
| cg19627006 | 0.65358 | 0.384035676 | -0.767123 | 1.80E-05 | hypomethylated |
| cg27149179 | 0.44042 | 0.258784865 | -0.767127 | 0.000176 | hypomethylated |
| cg12761965 | 0.51151 | 0.300534054 | -0.767234 | 0.000789 | hypomethylated |
| cg01484075 | 0.75513 | 0.44367027  | -0.767237 | 2.15E-05 | hypomethylated |
| cg11868461 | 0.40809 | 0.239761081 | -0.76729  | 0.000848 | hypomethylated |
| cg16588163 | 0.55551 | 0.326361081 | -0.767344 | 0.001395 | hypomethylated |
| cg00778190 | 0.60434 | 0.354984324 | -0.767605 | 0.000104 | hypomethylated |
| cg10459087 | 0.54398 | 0.31952     | -0.767647 | 0.000346 | hypomethylated |
| cg24540678 | 0.30823 | 0.181037297 | -0.76772  | 0.000303 | hypomethylated |
| cg22635096 | 0.60075 | 0.352843243 | -0.767737 | 0.000399 | hypomethylated |
| cg13065206 | 0.43471 | 0.25516973  | -0.768596 | 0.000245 | hypomethylated |
| cg14152591 | 0.59363 | 0.348331351 | -0.769104 | 9.49E-05 | hypomethylated |
| cg14171514 | 0.37648 | 0.220859459 | -0.769445 | 0.007158 | hypomethylated |
| cg24939196 | 0.50388 | 0.295561081 | -0.769624 | 0.0002   | hypomethylated |
| cg01282174 | 0.65309 | 0.383069189 | -0.769677 | 3.23E-05 | hypomethylated |
| cg06354695 | 0.75682 | 0.443868649 | -0.769817 | 2.71E-06 | hypomethylated |
| cg21052873 | 0.41378 | 0.242668108 | -0.769879 | 0.000626 | hypomethylated |
| cg25132536 | 0.49249 | 0.288761622 | -0.770215 | 9.60E-05 | hypomethylated |
| cg10184289 | 0.56343 | 0.330336216 | -0.770301 | 5.32E-05 | hypomethylated |
| cg27411547 | 0.87279 | 0.511704865 | -0.770323 | 2.45E-05 | hypomethylated |
| cg25773259 | 0.75883 | 0.444869189 | -0.770396 | 1.15E-05 | hypomethylated |
| cg10191240 | 0.60791 | 0.35630973  | -0.770726 | 0.001987 | hypomethylated |
| cg21145248 | 0.6987  | 0.40949027  | -0.770844 | 1.42E-05 | hypomethylated |
| cg07589202 | 0.68413 | 0.400928108 | -0.770927 | 9.82E-06 | hypomethylated |
| cg26192309 | 0.75273 | 0.441115135 | -0.770977 | 8.37E-06 | hypomethylated |
| cg04961042 | 0.84523 | 0.495321081 | -0.77098  | 1.54E-06 | hypomethylated |
| cg23680451 | 0.60273 | 0.353104865 | -0.771415 | 0.001452 | hypomethylated |
| cg23841186 | 0.60121 | 0.352182703 | -0.771545 | 0.000129 | hypomethylated |
| cg19405484 | 0.50563 | 0.296131351 | -0.771845 | 0.000474 | hypomethylated |
| cg24709951 | 0.63319 | 0.370838378 | -0.771848 | 0.000191 | hypomethylated |
| cg14969094 | 0.38373 | 0.224732973 | -0.77188  | 0.000132 | hypomethylated |
| cg07480640 | 0.50349 | 0.294716216 | -0.772637 | 0.000893 | hypomethylated |
| cg22018051 | 0.43811 | 0.256425405 | -0.772754 | 0.000495 | hypomethylated |

|            |         |             |           |          |                |
|------------|---------|-------------|-----------|----------|----------------|
| cg25953130 | 0.41059 | 0.240264324 | -0.773076 | 9.27E-05 | hypomethylated |
| cg25310081 | 0.47193 | 0.276154595 | -0.773097 | 0.004059 | hypomethylated |
| cg14189116 | 0.78793 | 0.461032973 | -0.773198 | 1.99E-05 | hypomethylated |
| cg21005416 | 0.57005 | 0.333513514 | -0.773343 | 0.001734 | hypomethylated |
| cg25015038 | 0.45192 | 0.264364324 | -0.77354  | 0.000374 | hypomethylated |
| cg26318265 | 0.38047 | 0.222505405 | -0.773942 | 0.000772 | hypomethylated |
| cg06822193 | 0.62208 | 0.363800541 | -0.773952 | 5.89E-06 | hypomethylated |
| cg26580869 | 0.5668  | 0.331462162 | -0.773996 | 8.13E-05 | hypomethylated |
| cg07086918 | 0.44539 | 0.260426486 | -0.774193 | 0.000741 | hypomethylated |
| cg04890576 | 0.53003 | 0.309859459 | -0.77446  | 0.000163 | hypomethylated |
| cg06578276 | 0.46601 | 0.272356216 | -0.774866 | 1.18E-05 | hypomethylated |
| cg03447547 | 0.66744 | 0.390045405 | -0.774996 | 1.54E-05 | hypomethylated |
| cg16849268 | 0.43073 | 0.251680541 | -0.77519  | 0.007933 | hypomethylated |
| cg10732611 | 0.31718 | 0.185251351 | -0.775818 | 0.000528 | hypomethylated |
| cg14189441 | 0.54692 | 0.319390811 | -0.776007 | 3.76E-05 | hypomethylated |
| cg05033401 | 0.25094 | 0.146535135 | -0.776096 | 0.0017   | hypomethylated |
| cg24435571 | 0.60615 | 0.353951351 | -0.776124 | 0.000464 | hypomethylated |
| cg08697732 | 0.63894 | 0.373072432 | -0.776225 | 2.51E-05 | hypomethylated |
| cg05088820 | 0.81237 | 0.474278378 | -0.776403 | 1.35E-05 | hypomethylated |
| cg21282907 | 0.45752 | 0.267074054 | -0.776595 | 0.000229 | hypomethylated |
| cg26680608 | 0.72193 | 0.421402162 | -0.776661 | 0.0003   | hypomethylated |
| cg04749549 | 0.2905  | 0.169522703 | -0.77706  | 5.79E-05 | hypomethylated |
| cg25423573 | 0.50864 | 0.296767568 | -0.777311 | 3.57E-05 | hypomethylated |
| cg21449597 | 0.53577 | 0.312595676 | -0.777316 | 3.39E-06 | hypomethylated |
| cg03171003 | 0.47666 | 0.278037297 | -0.777682 | 0.002363 | hypomethylated |
| cg13066703 | 0.6541  | 0.381468649 | -0.777947 | 0.00099  | hypomethylated |
| cg18081863 | 0.59955 | 0.349557297 | -0.778351 | 0.000106 | hypomethylated |
| cg06438559 | 0.66634 | 0.388377838 | -0.778798 | 1.09E-05 | hypomethylated |
| cg20890989 | 0.42415 | 0.247207027 | -0.778855 | 0.003843 | hypomethylated |
| cg13563026 | 0.37469 | 0.218364324 | -0.77896  | 0.000408 | hypomethylated |
| cg22365276 | 0.56708 | 0.330464324 | -0.779058 | 0.00095  | hypomethylated |
| cg14397690 | 0.49033 | 0.285658919 | -0.779459 | 0.000306 | hypomethylated |
| cg02832512 | 0.65529 | 0.381760541 | -0.779466 | 8.03E-05 | hypomethylated |
| cg15867307 | 0.71963 | 0.419123243 | -0.779881 | 4.10E-05 | hypomethylated |
| cg06728055 | 0.60493 | 0.352292432 | -0.779995 | 0.000283 | hypomethylated |
| cg25588844 | 0.672   | 0.391323243 | -0.7801   | 0.000435 | hypomethylated |
| cg07006935 | 0.74361 | 0.432904324 | -0.780498 | 1.75E-05 | hypomethylated |
| cg20042662 | 0.80363 | 0.467737838 | -0.780831 | 1.42E-05 | hypomethylated |
| cg27109748 | 0.76167 | 0.443285405 | -0.78093  | 5.45E-05 | hypomethylated |
| cg08900316 | 0.81343 | 0.473406486 | -0.780939 | 1.88E-06 | hypomethylated |
| cg03128029 | 0.5167  | 0.300690811 | -0.781046 | 0.000102 | hypomethylated |
| cg18460175 | 0.38396 | 0.223414054 | -0.781236 | 0.001587 | hypomethylated |
| cg26232553 | 0.71064 | 0.413463784 | -0.781358 | 0.000232 | hypomethylated |
| cg22367631 | 0.60114 | 0.349743784 | -0.781403 | 0.00099  | hypomethylated |
| cg11825899 | 0.52234 | 0.303887568 | -0.781452 | 0.000528 | hypomethylated |
| cg08928958 | 0.42958 | 0.249918919 | -0.781467 | 5.45E-05 | hypomethylated |
| cg08951051 | 0.34631 | 0.201418378 | -0.781869 | 9.72E-05 | hypomethylated |
| cg04121938 | 0.51288 | 0.298259459 | -0.782053 | 0.003255 | hypomethylated |
| cg21314318 | 0.52302 | 0.30414973  | -0.782084 | 0.000145 | hypomethylated |
| cg02468320 | 0.56814 | 0.330346486 | -0.782266 | 0.000772 | hypomethylated |
| cg22007110 | 0.57633 | 0.335102703 | -0.782292 | 0.000506 | hypomethylated |
| cg25072336 | 0.49702 | 0.28894973  | -0.782485 | 0.004863 | hypomethylated |
| cg07210669 | 0.56537 | 0.328572432 | -0.782984 | 0.000382 | hypomethylated |
| cg04416111 | 0.64867 | 0.376914054 | -0.783249 | 9.31E-06 | hypomethylated |
| cg21474062 | 0.42518 | 0.247042703 | -0.783313 | 0.000103 | hypomethylated |
| cg27022584 | 0.41684 | 0.242147568 | -0.783607 | 1.80E-05 | hypomethylated |
| cg00522451 | 0.65156 | 0.378496216 | -0.783619 | 6.62E-05 | hypomethylated |
| cg24178897 | 0.65369 | 0.379667568 | -0.78387  | 9.27E-05 | hypomethylated |

|            |         |             |           |          |                |
|------------|---------|-------------|-----------|----------|----------------|
| cg12674357 | 0.39913 | 0.231794054 | -0.784015 | 0.000805 | hypomethylated |
| cg24283921 | 0.3158  | 0.183355135 | -0.78437  | 0.00035  | hypomethylated |
| cg22610620 | 0.43038 | 0.249815135 | -0.78475  | 0.000245 | hypomethylated |
| cg12656085 | 0.66913 | 0.388338378 | -0.784972 | 0.00032  | hypomethylated |
| cg27592794 | 0.47002 | 0.272772973 | -0.785021 | 0.000109 | hypomethylated |
| cg17738521 | 0.63073 | 0.366014595 | -0.785121 | 0.000495 | hypomethylated |
| cg23261443 | 0.68214 | 0.39578973  | -0.785334 | 5.45E-05 | hypomethylated |
| cg14457284 | 0.39723 | 0.230440541 | -0.78558  | 4.47E-05 | hypomethylated |
| cg05406088 | 0.53393 | 0.309668108 | -0.785928 | 0.000789 | hypomethylated |
| cg03984209 | 0.46891 | 0.271842703 | -0.786539 | 0.000495 | hypomethylated |
| cg05750047 | 0.58062 | 0.336587027 | -0.786615 | 1.54E-05 | hypomethylated |
| cg18146074 | 0.57522 | 0.333437297 | -0.786698 | 9.69E-06 | hypomethylated |
| cg20656868 | 0.45873 | 0.265902703 | -0.786747 | 0.000219 | hypomethylated |
| cg02931058 | 0.64758 | 0.375263784 | -0.787153 | 7.47E-05 | hypomethylated |
| cg04627863 | 0.65556 | 0.379830811 | -0.787371 | 2.78E-05 | hypomethylated |
| cg04914221 | 0.79068 | 0.458071892 | -0.78752  | 2.68E-06 | hypomethylated |
| cg15833534 | 0.31396 | 0.181870811 | -0.787667 | 0.000696 | hypomethylated |
| cg16210447 | 0.47651 | 0.275989189 | -0.787895 | 0.00421  | hypomethylated |
| cg02582848 | 0.61505 | 0.3562      | -0.788016 | 6.95E-05 | hypomethylated |
| cg18643093 | 0.48096 | 0.278489189 | -0.788296 | 0.001734 | hypomethylated |
| cg03168497 | 0.47585 | 0.275473514 | -0.788593 | 0.002147 | hypomethylated |
| cg21452188 | 0.65064 | 0.376633514 | -0.788698 | 2.85E-05 | hypomethylated |
| cg22888181 | 0.54262 | 0.3141      | -0.788718 | 0.004445 | hypomethylated |
| cg18538668 | 0.42315 | 0.244938378 | -0.78875  | 0.000107 | hypomethylated |
| cg16912957 | 0.45969 | 0.266074054 | -0.788833 | 0.000122 | hypomethylated |
| cg05695106 | 0.76556 | 0.442903784 | -0.789522 | 7.72E-06 | hypomethylated |
| cg01117384 | 0.51561 | 0.298265405 | -0.789684 | 3.85E-06 | hypomethylated |
| cg01464985 | 0.27184 | 0.157244865 | -0.789745 | 0.000772 | hypomethylated |
| cg26995224 | 0.47829 | 0.276636757 | -0.789893 | 0.000142 | hypomethylated |
| cg15826479 | 0.4807  | 0.278012432 | -0.789987 | 0.000342 | hypomethylated |
| cg16888658 | 0.69029 | 0.399193514 | -0.790114 | 0.000229 | hypomethylated |
| cg14434062 | 0.50774 | 0.293595135 | -0.790262 | 0.000303 | hypomethylated |
| cg26052635 | 0.40682 | 0.235229189 | -0.790324 | 0.000386 | hypomethylated |
| cg24181174 | 0.41828 | 0.241735135 | -0.791042 | 1.89E-05 | hypomethylated |
| cg13298859 | 0.52122 | 0.301225405 | -0.791049 | 4.00E-05 | hypomethylated |
| cg19160624 | 0.45883 | 0.265147027 | -0.791167 | 1.38E-05 | hypomethylated |
| cg09432376 | 0.58495 | 0.337973514 | -0.791403 | 0.000327 | hypomethylated |
| cg04962621 | 0.50472 | 0.291597838 | -0.791503 | 3.19E-05 | hypomethylated |
| cg11724602 | 0.7639  | 0.441312973 | -0.791582 | 1.71E-05 | hypomethylated |
| cg17453456 | 0.54514 | 0.314909189 | -0.791691 | 2.21E-05 | hypomethylated |
| cg24408469 | 0.43865 | 0.253303243 | -0.792205 | 0.003255 | hypomethylated |
| cg26361436 | 0.59033 | 0.340853514 | -0.79237  | 0.000214 | hypomethylated |
| cg12591668 | 0.61875 | 0.357235676 | -0.79248  | 0.001875 | hypomethylated |
| cg20092122 | 0.51524 | 0.297463784 | -0.792531 | 0.003195 | hypomethylated |
| cg16849024 | 0.42372 | 0.244507027 | -0.793235 | 0.001875 | hypomethylated |
| cg18749404 | 0.57988 | 0.334572432 | -0.793436 | 5.28E-06 | hypomethylated |
| cg26775866 | 0.39183 | 0.226062703 | -0.793505 | 0.000219 | hypomethylated |
| cg26854588 | 0.65414 | 0.377396757 | -0.793517 | 2.85E-05 | hypomethylated |
| cg15026265 | 0.77999 | 0.449974054 | -0.793614 | 3.95E-05 | hypomethylated |
| cg03818307 | 0.63164 | 0.364367027 | -0.79371  | 3.57E-05 | hypomethylated |
| cg09451427 | 0.57534 | 0.331681081 | -0.794618 | 0.006015 | hypomethylated |
| cg19852660 | 0.42934 | 0.247476757 | -0.794828 | 0.000551 | hypomethylated |
| cg04255391 | 0.56479 | 0.325454595 | -0.795258 | 0.000365 | hypomethylated |
| cg15985132 | 0.77581 | 0.447051351 | -0.795263 | 1.54E-05 | hypomethylated |
| cg05033369 | 0.48996 | 0.282330811 | -0.795277 | 0.000142 | hypomethylated |
| cg23288838 | 0.51079 | 0.294309189 | -0.795398 | 0.000123 | hypomethylated |
| cg13181928 | 0.27046 | 0.155816216 | -0.79557  | 0.00071  | hypomethylated |
| cg06469726 | 0.63097 | 0.363508649 | -0.795582 | 5.93E-05 | hypomethylated |



|            |         |             |           |          |                |
|------------|---------|-------------|-----------|----------|----------------|
| cg04349084 | 0.55168 | 0.317791351 | -0.795752 | 0.000435 | hypomethylated |
| cg10825839 | 0.40269 | 0.231923243 | -0.796022 | 0.004608 | hypomethylated |
| cg03000596 | 0.51953 | 0.299191351 | -0.796139 | 0.000912 | hypomethylated |
| cg02920600 | 0.71813 | 0.41348     | -0.796427 | 4.36E-05 | hypomethylated |
| cg11798406 | 0.70446 | 0.405567027 | -0.796577 | 1.99E-05 | hypomethylated |
| cg03310376 | 0.6123  | 0.352432973 | -0.79689  | 0.001857 | hypomethylated |
| cg10344477 | 0.64921 | 0.373597297 | -0.797201 | 8.22E-05 | hypomethylated |
| cg02397720 | 0.53131 | 0.305704324 | -0.797417 | 0.004485 | hypomethylated |
| cg17654419 | 0.71818 | 0.413155135 | -0.797662 | 2.36E-06 | hypomethylated |
| cg11636127 | 0.33428 | 0.192272432 | -0.797905 | 0.000365 | hypomethylated |
| cg27183818 | 0.70706 | 0.406662703 | -0.798    | 5.32E-05 | hypomethylated |
| cg09220326 | 0.59456 | 0.341955135 | -0.798015 | 0.000335 | hypomethylated |
| cg11857093 | 0.39628 | 0.227909189 | -0.798061 | 0.00032  | hypomethylated |
| cg03962527 | 0.46608 | 0.268042703 | -0.798115 | 1.01E-05 | hypomethylated |
| cg12146829 | 0.51131 | 0.29404     | -0.798186 | 0.000417 | hypomethylated |
| cg25885280 | 0.55205 | 0.317374054 | -0.798615 | 0.000271 | hypomethylated |
| cg13410764 | 0.64239 | 0.369272973 | -0.798762 | 0.0003   | hypomethylated |
| cg16409012 | 0.57231 | 0.328981081 | -0.798792 | 0.000563 | hypomethylated |
| cg24251035 | 0.35422 | 0.203602703 | -0.798889 | 3.53E-05 | hypomethylated |
| cg06828335 | 0.76478 | 0.439416216 | -0.799457 | 1.45E-06 | hypomethylated |
| cg25946059 | 0.65221 | 0.374731351 | -0.79948  | 0.001912 | hypomethylated |
| cg09238801 | 0.57427 | 0.329902703 | -0.799689 | 0.000805 | hypomethylated |
| cg20168495 | 0.57261 | 0.328888649 | -0.799954 | 2.45E-05 | hypomethylated |
| cg25347526 | 0.56367 | 0.323727027 | -0.800073 | 5.19E-05 | hypomethylated |
| cg03257179 | 0.28624 | 0.164382703 | -0.800167 | 0.00032  | hypomethylated |
| cg10558233 | 0.49024 | 0.281488108 | -0.800414 | 0.004526 | hypomethylated |
| cg24522654 | 0.55241 | 0.317171351 | -0.800477 | 5.72E-05 | hypomethylated |
| cg16071681 | 0.51685 | 0.296749189 | -0.800502 | 0.002046 | hypomethylated |
| cg27594683 | 0.42361 | 0.243205405 | -0.800561 | 4.15E-05 | hypomethylated |
| cg22772930 | 0.63934 | 0.367017297 | -0.800735 | 2.79E-06 | hypomethylated |
| cg19291696 | 0.72887 | 0.418387027 | -0.800823 | 2.57E-05 | hypomethylated |
| cg17571559 | 0.72325 | 0.415108649 | -0.801005 | 1.99E-05 | hypomethylated |
| cg08382534 | 0.8367  | 0.480212973 | -0.801036 | 9.82E-06 | hypomethylated |
| cg00294382 | 0.42109 | 0.241671892 | -0.801079 | 0.001176 | hypomethylated |
| cg15878619 | 0.31088 | 0.178374595 | -0.801448 | 0.002253 | hypomethylated |
| cg21289919 | 0.39613 | 0.227265946 | -0.801592 | 0.000224 | hypomethylated |
| cg03055671 | 0.56539 | 0.324372973 | -0.801593 | 0.001452 | hypomethylated |
| cg06545761 | 0.73454 | 0.421415135 | -0.801599 | 7.47E-05 | hypomethylated |
| cg21330896 | 0.58121 | 0.333444865 | -0.801611 | 0.005606 | hypomethylated |
| cg06783423 | 0.36445 | 0.209087027 | -0.801617 | 0.001096 | hypomethylated |
| cg04396998 | 0.36531 | 0.209573514 | -0.801665 | 0.001893 | hypomethylated |
| cg21699330 | 0.52316 | 0.300097838 | -0.801819 | 0.000696 | hypomethylated |
| cg00108282 | 0.73113 | 0.419136757 | -0.802707 | 1.25E-05 | hypomethylated |
| cg14163444 | 0.37408 | 0.214395135 | -0.803075 | 0.002829 | hypomethylated |
| cg10321156 | 0.41668 | 0.238793514 | -0.803176 | 0.000517 | hypomethylated |
| cg23289024 | 0.46943 | 0.26892973  | -0.803681 | 0.003571 | hypomethylated |
| cg15474318 | 0.31477 | 0.180325405 | -0.803695 | 0.000191 | hypomethylated |
| cg09240693 | 0.65405 | 0.374591351 | -0.804083 | 1.31E-05 | hypomethylated |
| cg13464117 | 0.62428 | 0.357437297 | -0.804503 | 5.43E-06 | hypomethylated |
| cg17416730 | 0.40581 | 0.232177838 | -0.805574 | 0.005223 | hypomethylated |
| cg05307752 | 0.55336 | 0.316576757 | -0.805663 | 0.000224 | hypomethylated |
| cg12810800 | 0.55107 | 0.315265405 | -0.805669 | 2.15E-05 | hypomethylated |
| cg10397389 | 0.63208 | 0.361453514 | -0.806297 | 0.000575 | hypomethylated |
| cg20031845 | 0.59094 | 0.337882162 | -0.806491 | 0.000718 | hypomethylated |
| cg08371391 | 0.35424 | 0.202503784 | -0.806778 | 0.000875 | hypomethylated |
| cg14140118 | 0.79446 | 0.454155135 | -0.806789 | 6.39E-06 | hypomethylated |
| cg03731202 | 0.52813 | 0.301876216 | -0.806936 | 9.95E-05 | hypomethylated |
| cg14870271 | 0.3087  | 0.176404324 | -0.80732  | 1.50E-05 | hypomethylated |

|            |         |             |           |          |                |
|------------|---------|-------------|-----------|----------|----------------|
| cg07621749 | 0.38796 | 0.221692432 | -0.807348 | 0.001141 | hypomethylated |
| cg22734058 | 0.68252 | 0.389999459 | -0.807399 | 5.65E-06 | hypomethylated |
| cg14611816 | 0.44143 | 0.252227027 | -0.807462 | 5.07E-06 | hypomethylated |
| cg04555941 | 0.48655 | 0.277965405 | -0.807683 | 0.000365 | hypomethylated |
| cg08272572 | 0.48624 | 0.277776757 | -0.807743 | 0.001368 | hypomethylated |
| cg24796998 | 0.6968  | 0.397934595 | -0.808213 | 3.57E-05 | hypomethylated |
| cg04424621 | 0.46121 | 0.263352432 | -0.808429 | 0.000756 | hypomethylated |
| cg24503796 | 0.29877 | 0.170588649 | -0.808514 | 0.001212 | hypomethylated |
| cg27067618 | 0.43659 | 0.249238919 | -0.80875  | 2.78E-05 | hypomethylated |
| cg17605604 | 0.61923 | 0.353477297 | -0.808858 | 5.72E-05 | hypomethylated |
| cg12492380 | 0.81241 | 0.463645405 | -0.809186 | 2.71E-06 | hypomethylated |
| cg05956608 | 0.5863  | 0.334579459 | -0.80929  | 0.001074 | hypomethylated |
| cg26188212 | 0.37982 | 0.216679459 | -0.809753 | 2.10E-05 | hypomethylated |
| cg09213124 | 0.28036 | 0.159841622 | -0.810637 | 0.00071  | hypomethylated |
| cg15564590 | 0.17572 | 0.100170811 | -0.810816 | 0.000805 | hypomethylated |
| cg15543045 | 0.46894 | 0.267316216 | -0.810856 | 0.010042 | hypomethylated |
| cg10011232 | 0.23758 | 0.135414054 | -0.811036 | 0.001452 | hypomethylated |
| cg26099834 | 0.43964 | 0.250490811 | -0.811565 | 0.0012   | hypomethylated |
| cg03240301 | 0.64523 | 0.367597838 | -0.811685 | 9.27E-05 | hypomethylated |
| cg21398275 | 0.29042 | 0.16544     | -0.811833 | 0.004248 | hypomethylated |
| cg10460033 | 0.41474 | 0.236220541 | -0.812073 | 0.000417 | hypomethylated |
| cg04147593 | 0.61247 | 0.348793514 | -0.812266 | 6.78E-05 | hypomethylated |
| cg16799831 | 0.44272 | 0.252057838 | -0.81264  | 4.36E-05 | hypomethylated |
| cg23138413 | 0.58929 | 0.335470811 | -0.812791 | 1.31E-05 | hypomethylated |
| cg14660676 | 0.70444 | 0.400918919 | -0.813166 | 3.90E-06 | hypomethylated |
| cg10943263 | 0.58276 | 0.331645946 | -0.813258 | 0.000506 | hypomethylated |
| cg19828516 | 0.3286  | 0.186976757 | -0.813474 | 0.000581 | hypomethylated |
| cg02462661 | 0.49453 | 0.28138973  | -0.813488 | 5.72E-05 | hypomethylated |
| cg09077096 | 0.89132 | 0.50714973  | -0.813532 | 1.72E-06 | hypomethylated |
| cg02099474 | 0.5035  | 0.286446486 | -0.813726 | 9.95E-05 | hypomethylated |
| cg06971773 | 0.34448 | 0.195977297 | -0.813734 | 0.000551 | hypomethylated |
| cg21936552 | 0.64664 | 0.367828649 | -0.813929 | 2.04E-05 | hypomethylated |
| cg15536663 | 0.43747 | 0.248736216 | -0.814568 | 0.000445 | hypomethylated |
| cg17515024 | 0.46546 | 0.264617297 | -0.81475  | 0.000667 | hypomethylated |
| cg18670236 | 0.56637 | 0.321958378 | -0.814871 | 0.003316 | hypomethylated |
| cg18778196 | 0.52545 | 0.298668108 | -0.81501  | 0.000182 | hypomethylated |
| cg04499701 | 0.6564  | 0.373003784 | -0.815385 | 2.96E-05 | hypomethylated |
| cg17143518 | 0.28659 | 0.162837297 | -0.815557 | 0.000626 | hypomethylated |
| cg16242615 | 0.5309  | 0.301633514 | -0.815643 | 9.95E-05 | hypomethylated |
| cg14072016 | 0.81639 | 0.463685405 | -0.816112 | 8.04E-06 | hypomethylated |
| cg01329577 | 0.3389  | 0.192455676 | -0.816333 | 0.011649 | hypomethylated |
| cg20904475 | 0.42334 | 0.24037027  | -0.816558 | 9.95E-05 | hypomethylated |
| cg22191981 | 0.59748 | 0.33918     | -0.816839 | 0.002649 | hypomethylated |
| cg15972148 | 0.74427 | 0.422503243 | -0.816864 | 3.07E-05 | hypomethylated |
| cg01511901 | 0.49846 | 0.282870811 | -0.817334 | 0.000485 | hypomethylated |
| cg09293816 | 0.61556 | 0.349316216 | -0.817366 | 8.84E-05 | hypomethylated |
| cg03906115 | 0.4189  | 0.237678919 | -0.817592 | 0.000232 | hypomethylated |
| cg21684021 | 0.52664 | 0.298782162 | -0.817723 | 0.000563 | hypomethylated |
| cg00430895 | 0.46865 | 0.265880541 | -0.817733 | 0.000857 | hypomethylated |
| cg23222604 | 0.32235 | 0.182848108 | -0.817982 | 0.000135 | hypomethylated |
| cg12848614 | 0.23449 | 0.133007568 | -0.818018 | 0.000417 | hypomethylated |
| cg02523270 | 0.48626 | 0.275797838 | -0.818117 | 0.001314 | hypomethylated |
| cg00806644 | 0.6755  | 0.38312973  | -0.818123 | 0.001031 | hypomethylated |
| cg09851528 | 0.31855 | 0.180644865 | -0.818364 | 1.35E-05 | hypomethylated |
| cg11916054 | 0.35601 | 0.201884324 | -0.818389 | 0.002856 | hypomethylated |
| cg03254336 | 0.51041 | 0.289377297 | -0.818705 | 0.000358 | hypomethylated |
| cg03059420 | 0.2935  | 0.166365405 | -0.819005 | 0.001188 | hypomethylated |
| cg04927537 | 0.3563  | 0.201951892 | -0.819081 | 9.57E-06 | hypomethylated |

|            |         |             |           |          |                |
|------------|---------|-------------|-----------|----------|----------------|
| cg21837069 | 0.42065 | 0.238251351 | -0.820136 | 0.003571 | hypomethylated |
| cg25731261 | 0.57116 | 0.323477297 | -0.82023  | 7.84E-05 | hypomethylated |
| cg25856090 | 0.69848 | 0.395433514 | -0.820784 | 2.04E-05 | hypomethylated |
| cg10820936 | 0.55541 | 0.314415676 | -0.82088  | 0.003136 | hypomethylated |
| cg11767757 | 0.41375 | 0.234002162 | -0.822237 | 0.000182 | hypomethylated |
| cg14255824 | 0.77384 | 0.437604865 | -0.822407 | 2.27E-05 | hypomethylated |
| cg08698943 | 0.49313 | 0.278850811 | -0.822475 | 0.0002   | hypomethylated |
| cg12255995 | 0.47356 | 0.267756216 | -0.822627 | 0.003571 | hypomethylated |
| cg06653796 | 0.55277 | 0.31249027  | -0.822868 | 0.000195 | hypomethylated |
| cg22357164 | 0.43788 | 0.247540541 | -0.822871 | 0.000293 | hypomethylated |
| cg03076037 | 0.4067  | 0.229872973 | -0.823128 | 1.35E-05 | hypomethylated |
| cg10180415 | 0.57971 | 0.327555676 | -0.823591 | 0.000839 | hypomethylated |
| cg06889339 | 0.37835 | 0.213605405 | -0.824773 | 0.007035 | hypomethylated |
| cg20151476 | 0.89491 | 0.505197297 | -0.824896 | 1.18E-05 | hypomethylated |
| cg11972305 | 0.31038 | 0.175204324 | -0.824997 | 0.000342 | hypomethylated |
| cg13413719 | 0.60198 | 0.339804324 | -0.825011 | 0.000696 | hypomethylated |
| cg01135464 | 0.64683 | 0.365074595 | -0.825195 | 0.000155 | hypomethylated |
| cg17942763 | 0.48598 | 0.274275135 | -0.825273 | 5.65E-05 | hypomethylated |
| cg03441171 | 0.46513 | 0.262431892 | -0.825691 | 0.000408 | hypomethylated |
| cg03339910 | 0.58125 | 0.327789189 | -0.826391 | 0.000219 | hypomethylated |
| cg21661379 | 0.48267 | 0.272176216 | -0.826496 | 0.000399 | hypomethylated |
| cg02917867 | 0.38723 | 0.218343784 | -0.826589 | 7.12E-05 | hypomethylated |
| cg13292703 | 0.48532 | 0.273557838 | -0.82709  | 0.00017  | hypomethylated |
| cg19951006 | 0.57723 | 0.325339459 | -0.8272   | 2.38E-05 | hypomethylated |
| cg16282892 | 0.59535 | 0.335495676 | -0.827444 | 0.000551 | hypomethylated |
| cg26082814 | 0.70267 | 0.395938919 | -0.827569 | 5.28E-06 | hypomethylated |
| cg08527124 | 0.58528 | 0.329382162 | -0.829365 | 0.00291  | hypomethylated |
| cg09046979 | 0.44906 | 0.252685946 | -0.829563 | 1.48E-05 | hypomethylated |
| cg24935896 | 0.65831 | 0.370416216 | -0.82962  | 1.06E-05 | hypomethylated |
| cg06028808 | 0.33422 | 0.188004324 | -0.830032 | 0.001176 | hypomethylated |
| cg00755063 | 0.31046 | 0.174631351 | -0.830095 | 0.003255 | hypomethylated |
| cg10615591 | 0.57063 | 0.320931892 | -0.830288 | 0.000667 | hypomethylated |
| cg13058457 | 0.61843 | 0.347788108 | -0.830402 | 0.000588 | hypomethylated |
| cg23108232 | 0.48546 | 0.272926486 | -0.83084  | 0.000306 | hypomethylated |
| cg17076667 | 0.48722 | 0.273803243 | -0.831434 | 1.18E-05 | hypomethylated |
| cg08922729 | 0.37563 | 0.211021081 | -0.831925 | 3.95E-05 | hypomethylated |
| cg06914505 | 0.44466 | 0.249743243 | -0.832257 | 9.95E-05 | hypomethylated |
| cg03867607 | 0.42721 | 0.239923784 | -0.832369 | 0.006679 | hypomethylated |
| cg05214748 | 0.43819 | 0.245921622 | -0.833358 | 0.002599 | hypomethylated |
| cg20337996 | 0.51731 | 0.290288649 | -0.833541 | 0.001987 | hypomethylated |
| cg11093142 | 0.68425 | 0.383904865 | -0.833775 | 9.49E-05 | hypomethylated |
| cg04148285 | 0.37694 | 0.211475676 | -0.833843 | 0.00035  | hypomethylated |
| cg02399371 | 0.67562 | 0.379009189 | -0.833979 | 3.90E-06 | hypomethylated |
| cg05907835 | 0.43031 | 0.241376757 | -0.83409  | 0.003255 | hypomethylated |
| cg04275695 | 0.47578 | 0.266856757 | -0.834229 | 0.000417 | hypomethylated |
| cg06521357 | 0.41129 | 0.230635676 | -0.83454  | 0.000756 | hypomethylated |
| cg03434029 | 0.22647 | 0.126971351 | -0.834817 | 0.000195 | hypomethylated |
| cg01980793 | 0.52226 | 0.292794595 | -0.834879 | 0.00048  | hypomethylated |
| cg13985234 | 0.54045 | 0.302981622 | -0.834931 | 0.004445 | hypomethylated |
| cg24328095 | 0.44466 | 0.249212432 | -0.835327 | 0.000142 | hypomethylated |
| cg19266329 | 0.51909 | 0.290897297 | -0.835475 | 4.10E-05 | hypomethylated |
| cg24495643 | 0.52259 | 0.292644324 | -0.836531 | 0.000293 | hypomethylated |
| cg09715059 | 0.51581 | 0.288836757 | -0.836585 | 0.000107 | hypomethylated |
| cg02200207 | 0.63047 | 0.352978378 | -0.836848 | 0.000358 | hypomethylated |
| cg24033633 | 0.63376 | 0.354800541 | -0.836928 | 0.001    | hypomethylated |
| cg15454698 | 0.59936 | 0.33548973  | -0.837154 | 0.00024  | hypomethylated |
| cg00446123 | 0.77272 | 0.432516757 | -0.83719  | 0.000198 | hypomethylated |
| cg23679344 | 0.71694 | 0.401257838 | -0.837323 | 2.02E-05 | hypomethylated |

|            |         |             |           |          |                |
|------------|---------|-------------|-----------|----------|----------------|
| cg03495084 | 0.51565 | 0.288565946 | -0.837491 | 0.00035  | hypomethylated |
| cg02088237 | 0.45398 | 0.253991351 | -0.837849 | 0.002502 | hypomethylated |
| cg20785674 | 0.51485 | 0.287941081 | -0.838379 | 0.015196 | hypomethylated |
| cg13602461 | 0.6027  | 0.336963784 | -0.838847 | 0.000224 | hypomethylated |
| cg09473745 | 0.29973 | 0.167497297 | -0.839526 | 0.000517 | hypomethylated |
| cg11229273 | 0.56892 | 0.317876216 | -0.839761 | 0.00071  | hypomethylated |
| cg16547186 | 0.48834 | 0.272774595 | -0.840177 | 0.00101  | hypomethylated |
| cg22378252 | 0.41096 | 0.229531351 | -0.840307 | 0.000176 | hypomethylated |
| cg19972648 | 0.66001 | 0.368608649 | -0.840398 | 3.85E-05 | hypomethylated |
| cg08482837 | 0.70124 | 0.391620541 | -0.840452 | 4.00E-05 | hypomethylated |
| cg15934095 | 0.73268 | 0.409111351 | -0.84069  | 1.77E-05 | hypomethylated |
| cg02898159 | 0.48512 | 0.270785946 | -0.841189 | 0.0002   | hypomethylated |
| cg00480331 | 0.38764 | 0.216323243 | -0.841529 | 0.002455 | hypomethylated |
| cg02805890 | 0.51674 | 0.28835027  | -0.841616 | 0.003705 | hypomethylated |
| cg06968859 | 0.57009 | 0.3181      | -0.841709 | 9.31E-06 | hypomethylated |
| cg04943879 | 0.54758 | 0.305537838 | -0.841719 | 2.39E-05 | hypomethylated |
| cg26954174 | 0.43845 | 0.244631351 | -0.841803 | 0.000703 | hypomethylated |
| cg24028809 | 0.61444 | 0.3428      | -0.841905 | 0.000517 | hypomethylated |
| cg03620376 | 0.33819 | 0.188662703 | -0.842025 | 0.000741 | hypomethylated |
| cg15176413 | 0.42331 | 0.236145946 | -0.842036 | 0.0006   | hypomethylated |
| cg26392367 | 0.49394 | 0.275520541 | -0.842176 | 0.000726 | hypomethylated |
| cg07727594 | 0.58298 | 0.32514     | -0.842385 | 2.04E-05 | hypomethylated |
| cg16801374 | 0.27996 | 0.156118919 | -0.842575 | 0.005411 | hypomethylated |
| cg25461508 | 0.47106 | 0.262675135 | -0.842631 | 0.000772 | hypomethylated |
| cg21410633 | 0.35243 | 0.196514054 | -0.842704 | 0.001635 | hypomethylated |
| cg10142237 | 0.42357 | 0.236100541 | -0.843199 | 0.000138 | hypomethylated |
| cg16233797 | 0.82493 | 0.459600541 | -0.843891 | 3.44E-06 | hypomethylated |
| cg08884752 | 0.42802 | 0.238442703 | -0.844036 | 8.22E-05 | hypomethylated |
| cg24996979 | 0.4346  | 0.242071351 | -0.844256 | 0.001912 | hypomethylated |
| cg06613738 | 0.7697  | 0.4287      | -0.844328 | 1.80E-05 | hypomethylated |
| cg22161562 | 0.43557 | 0.242529189 | -0.844746 | 0.00054  | hypomethylated |
| cg11304234 | 0.38419 | 0.213908108 | -0.844829 | 1.46E-05 | hypomethylated |
| cg04921315 | 0.68891 | 0.383496757 | -0.845101 | 0.000182 | hypomethylated |
| cg17345741 | 0.35335 | 0.196687027 | -0.845196 | 2.78E-05 | hypomethylated |
| cg26733301 | 0.54782 | 0.304914054 | -0.845299 | 0.003506 | hypomethylated |
| cg02488653 | 0.38256 | 0.212917297 | -0.845393 | 0.005808 | hypomethylated |
| cg03254465 | 0.29128 | 0.162081622 | -0.845686 | 0.01274  | hypomethylated |
| cg17186066 | 0.59458 | 0.330831351 | -0.845775 | 0.001164 | hypomethylated |
| cg26402417 | 0.70594 | 0.392751892 | -0.845927 | 0.000251 | hypomethylated |
| cg13197560 | 0.7679  | 0.42722     | -0.845939 | 2.51E-05 | hypomethylated |
| cg01553231 | 0.79419 | 0.441766486 | -0.8462   | 1.99E-05 | hypomethylated |
| cg25298161 | 0.46417 | 0.258179459 | -0.846279 | 0.000382 | hypomethylated |
| cg01538305 | 0.49332 | 0.274371892 | -0.846391 | 6.01E-05 | hypomethylated |
| cg18975416 | 0.56923 | 0.316529189 | -0.846673 | 0.000831 | hypomethylated |
| cg14302214 | 0.83177 | 0.462413514 | -0.847001 | 5.28E-06 | hypomethylated |
| cg19919590 | 0.49813 | 0.276900541 | -0.847154 | 0.001603 | hypomethylated |
| cg10575547 | 0.7485  | 0.416037838 | -0.847288 | 1.31E-05 | hypomethylated |
| cg23021584 | 0.68543 | 0.380954595 | -0.84739  | 0.000129 | hypomethylated |
| cg21370924 | 0.40289 | 0.223865946 | -0.847751 | 0.000159 | hypomethylated |
| cg04470557 | 0.40217 | 0.223425946 | -0.848009 | 0.001875 | hypomethylated |
| cg13579607 | 0.45379 | 0.252084324 | -0.848118 | 0.000575 | hypomethylated |
| cg08003402 | 0.63121 | 0.350610811 | -0.84825  | 0.000174 | hypomethylated |
| cg12510708 | 0.61799 | 0.343244324 | -0.848348 | 0.000126 | hypomethylated |
| cg17266282 | 0.56144 | 0.311803243 | -0.848496 | 0.001096 | hypomethylated |
| cg07271561 | 0.28947 | 0.16076     | -0.848505 | 0.00095  | hypomethylated |
| cg15331705 | 0.55154 | 0.306300541 | -0.848518 | 4.47E-05 | hypomethylated |
| cg11170179 | 0.27126 | 0.150627568 | -0.84869  | 0.000454 | hypomethylated |
| cg20940675 | 0.47641 | 0.264538919 | -0.848724 | 0.000474 | hypomethylated |

|            |         |             |           |          |                |
|------------|---------|-------------|-----------|----------|----------------|
| cg11970797 | 0.73491 | 0.407974054 | -0.84909  | 3.76E-05 | hypomethylated |
| cg04510874 | 0.32698 | 0.181512973 | -0.84913  | 0.000474 | hypomethylated |
| cg26781466 | 0.35023 | 0.19438973  | -0.849351 | 0.000248 | hypomethylated |
| cg22254463 | 0.79434 | 0.440848649 | -0.849473 | 3.07E-05 | hypomethylated |
| cg02772121 | 0.84626 | 0.469417838 | -0.850228 | 4.24E-06 | hypomethylated |
| cg02693002 | 0.20369 | 0.112968108 | -0.85046  | 0.00097  | hypomethylated |
| cg15321306 | 0.73667 | 0.40847027  | -0.850787 | 4.48E-06 | hypomethylated |
| cg10437265 | 0.48687 | 0.26993027  | -0.85095  | 1.66E-05 | hypomethylated |
| cg26177041 | 0.67076 | 0.371716757 | -0.851593 | 2.04E-05 | hypomethylated |
| cg14283454 | 0.39733 | 0.220141622 | -0.851906 | 0.000374 | hypomethylated |
| cg10611580 | 0.47265 | 0.26172     | -0.852748 | 0.00097  | hypomethylated |
| cg08614871 | 0.42877 | 0.237416757 | -0.852782 | 0.0017   | hypomethylated |
| cg23958704 | 0.65467 | 0.36238     | -0.853265 | 0.000117 | hypomethylated |
| cg04760448 | 0.66763 | 0.369543784 | -0.853303 | 3.39E-06 | hypomethylated |
| cg25383479 | 0.23829 | 0.131896216 | -0.853315 | 0.004365 | hypomethylated |
| cg12902896 | 0.43166 | 0.238873514 | -0.853649 | 7.47E-05 | hypomethylated |
| cg14204586 | 0.47394 | 0.262197297 | -0.854052 | 0.000421 | hypomethylated |
| cg19095568 | 0.61225 | 0.33871027  | -0.854069 | 0.000127 | hypomethylated |
| cg11421182 | 0.5857  | 0.323927568 | -0.854491 | 1.72E-06 | hypomethylated |
| cg10185478 | 0.57545 | 0.318223243 | -0.854651 | 0.000893 | hypomethylated |
| cg15355111 | 0.466   | 0.257642162 | -0.854961 | 0.000805 | hypomethylated |
| cg02771117 | 0.635   | 0.351064324 | -0.855021 | 8.84E-05 | hypomethylated |
| cg16715129 | 0.4523  | 0.250027027 | -0.855196 | 0.000653 | hypomethylated |
| cg17641252 | 0.61917 | 0.342236216 | -0.855343 | 3.40E-05 | hypomethylated |
| cg17472111 | 0.45374 | 0.250778919 | -0.85545  | 0.000195 | hypomethylated |
| cg05417332 | 0.36088 | 0.19942     | -0.855709 | 0.001354 | hypomethylated |
| cg06362313 | 0.50332 | 0.278124324 | -0.855746 | 1.11E-05 | hypomethylated |
| cg24036791 | 0.85261 | 0.470942162 | -0.856336 | 4.24E-06 | hypomethylated |
| cg24327132 | 0.50349 | 0.278062703 | -0.856553 | 0.000176 | hypomethylated |
| cg19531130 | 0.38553 | 0.212851351 | -0.856997 | 0.00078  | hypomethylated |
| cg24671734 | 0.53227 | 0.293795676 | -0.857345 | 0.001074 | hypomethylated |
| cg07078958 | 0.63635 | 0.351235135 | -0.857383 | 0.000435 | hypomethylated |
| cg07277549 | 0.52277 | 0.288527027 | -0.85747  | 0.000474 | hypomethylated |
| cg17327067 | 0.33382 | 0.184195135 | -0.857835 | 3.49E-05 | hypomethylated |
| cg13782615 | 0.51222 | 0.282605946 | -0.857972 | 0.008491 | hypomethylated |
| cg19274341 | 0.51592 | 0.284371892 | -0.859369 | 0.001667 | hypomethylated |
| cg20388580 | 0.59429 | 0.327557838 | -0.859417 | 0.000921 | hypomethylated |
| cg21380183 | 0.31296 | 0.172462703 | -0.859694 | 0.003255 | hypomethylated |
| cg06112171 | 0.67545 | 0.372185946 | -0.859825 | 6.57E-06 | hypomethylated |
| cg07162085 | 0.55178 | 0.30403027  | -0.859878 | 1.31E-05 | hypomethylated |
| cg16800111 | 0.2218  | 0.122193514 | -0.860092 | 0.000725 | hypomethylated |
| cg09817016 | 0.33774 | 0.186051892 | -0.860208 | 0.000245 | hypomethylated |
| cg17980404 | 0.55851 | 0.30751027  | -0.860949 | 0.0002   | hypomethylated |
| cg05951609 | 0.37429 | 0.206079459 | -0.860956 | 0.001212 | hypomethylated |
| cg03063658 | 0.50452 | 0.277662162 | -0.861581 | 0.000142 | hypomethylated |
| cg25888386 | 0.61284 | 0.337237297 | -0.861746 | 0.00134  | hypomethylated |
| cg07912922 | 0.62804 | 0.345384865 | -0.862652 | 0.001768 | hypomethylated |
| cg22027433 | 0.52311 | 0.287597838 | -0.863062 | 0.002231 | hypomethylated |
| cg22786667 | 0.56951 | 0.312979459 | -0.863653 | 8.63E-05 | hypomethylated |
| cg10466548 | 0.3971  | 0.218203784 | -0.863826 | 0.002599 | hypomethylated |
| cg06191357 | 0.20519 | 0.112738378 | -0.863982 | 0.000756 | hypomethylated |
| cg10364630 | 0.29263 | 0.160762162 | -0.86415  | 0.010819 | hypomethylated |
| cg25258233 | 0.25908 | 0.142294595 | -0.864517 | 0.003637 | hypomethylated |
| cg13876325 | 0.63063 | 0.346141622 | -0.865431 | 6.15E-05 | hypomethylated |
| cg14065857 | 0.64611 | 0.354543784 | -0.865816 | 6.46E-05 | hypomethylated |
| cg04214938 | 0.71593 | 0.392841622 | -0.865871 | 7.12E-05 | hypomethylated |
| cg26020069 | 0.49662 | 0.272500541 | -0.865883 | 1.35E-05 | hypomethylated |
| cg04262471 | 0.31704 | 0.173881622 | -0.866559 | 0.005706 | hypomethylated |

|            |         |             |           |          |                |
|------------|---------|-------------|-----------|----------|----------------|
| cg09845604 | 0.39279 | 0.215412973 | -0.866653 | 0.000696 | hypomethylated |
| cg05257291 | 0.33213 | 0.182053514 | -0.867385 | 0.009877 | hypomethylated |
| cg09507567 | 0.5237  | 0.286988108 | -0.86775  | 1.09E-05 | hypomethylated |
| cg17411016 | 0.45002 | 0.246592432 | -0.867861 | 0.0002   | hypomethylated |
| cg11811510 | 0.53747 | 0.294482703 | -0.868001 | 0.000495 | hypomethylated |
| cg10241809 | 0.33446 | 0.183187568 | -0.868512 | 1.84E-05 | hypomethylated |
| cg02747253 | 0.37017 | 0.202728649 | -0.868638 | 0.001409 | hypomethylated |
| cg23328404 | 0.49415 | 0.270625405 | -0.868652 | 0.000245 | hypomethylated |
| cg24956391 | 0.77765 | 0.425816757 | -0.868888 | 6.46E-05 | hypomethylated |
| cg11123744 | 0.60626 | 0.331888649 | -0.869237 | 2.74E-05 | hypomethylated |
| cg06616245 | 0.32893 | 0.180048649 | -0.869394 | 0.000469 | hypomethylated |
| cg23391288 | 0.77737 | 0.425445946 | -0.869626 | 1.35E-05 | hypomethylated |
| cg07709148 | 0.25198 | 0.137903784 | -0.869647 | 0.004608 | hypomethylated |
| cg13446584 | 0.82614 | 0.451894054 | -0.870402 | 4.24E-06 | hypomethylated |
| cg05191839 | 0.60408 | 0.330397838 | -0.870535 | 5.00E-06 | hypomethylated |
| cg08824384 | 0.43698 | 0.23896     | -0.870798 | 5.58E-05 | hypomethylated |
| cg03498081 | 0.47546 | 0.25996973  | -0.87098  | 0.000382 | hypomethylated |
| cg22110158 | 0.57063 | 0.311999459 | -0.871012 | 6.22E-06 | hypomethylated |
| cg06457736 | 0.75493 | 0.412724865 | -0.871163 | 3.15E-05 | hypomethylated |
| cg02538248 | 0.37783 | 0.206508108 | -0.871539 | 3.23E-05 | hypomethylated |
| cg22737241 | 0.59768 | 0.326544324 | -0.872094 | 0.000204 | hypomethylated |
| cg04894537 | 0.6273  | 0.342676216 | -0.872309 | 7.03E-05 | hypomethylated |
| cg12048965 | 0.66095 | 0.361055676 | -0.87232  | 0.000182 | hypomethylated |
| cg22382836 | 0.49171 | 0.268585946 | -0.872424 | 0.001237 | hypomethylated |
| cg16541026 | 0.4054  | 0.221438919 | -0.872437 | 2.04E-05 | hypomethylated |
| cg00085448 | 0.27059 | 0.147788649 | -0.872573 | 0.003195 | hypomethylated |
| cg21574271 | 0.59021 | 0.322322703 | -0.872723 | 7.29E-05 | hypomethylated |
| cg22918360 | 0.37009 | 0.202089189 | -0.872884 | 0.007472 | hypomethylated |
| cg08528170 | 0.39189 | 0.213955676 | -0.873137 | 0.00291  | hypomethylated |
| cg27115863 | 0.49047 | 0.2677      | -0.873548 | 0.000633 | hypomethylated |
| cg17367616 | 0.4825  | 0.263261622 | -0.874032 | 9.49E-05 | hypomethylated |
| cg21851534 | 0.37399 | 0.204       | -0.874431 | 0.0017   | hypomethylated |
| cg22728904 | 0.50657 | 0.276298378 | -0.874535 | 0.000365 | hypomethylated |
| cg12126038 | 0.59528 | 0.324568649 | -0.875045 | 6.22E-06 | hypomethylated |
| cg21461300 | 0.31188 | 0.170044324 | -0.87508  | 0.000185 | hypomethylated |
| cg15653254 | 0.66219 | 0.360997297 | -0.875257 | 3.21E-06 | hypomethylated |
| cg17501395 | 0.55805 | 0.304215676 | -0.8753   | 0.000575 | hypomethylated |
| cg25123566 | 0.52516 | 0.28627027  | -0.875379 | 0.003538 | hypomethylated |
| cg10025586 | 0.6205  | 0.338170811 | -0.875679 | 0.000142 | hypomethylated |
| cg04998634 | 0.4406  | 0.240082162 | -0.875941 | 0.003473 | hypomethylated |
| cg16820615 | 0.42174 | 0.229762162 | -0.876213 | 0.000551 | hypomethylated |
| cg10576245 | 0.62696 | 0.34156     | -0.876234 | 0.000274 | hypomethylated |
| cg13997435 | 0.42603 | 0.232041081 | -0.876575 | 2.15E-05 | hypomethylated |
| cg08412188 | 0.27555 | 0.150068649 | -0.876692 | 0.001857 | hypomethylated |
| cg09889479 | 0.38598 | 0.210188649 | -0.876841 | 0.000138 | hypomethylated |
| cg20561863 | 0.4882  | 0.265795135 | -0.877158 | 9.27E-05 | hypomethylated |
| cg10732871 | 0.2846  | 0.154941622 | -0.877211 | 9.83E-05 | hypomethylated |
| cg13022977 | 0.28701 | 0.156248108 | -0.877262 | 0.000157 | hypomethylated |
| cg17951713 | 0.45043 | 0.245083784 | -0.878028 | 0.000107 | hypomethylated |
| cg22354646 | 0.41294 | 0.224649189 | -0.878258 | 0.000132 | hypomethylated |
| cg12458966 | 0.50689 | 0.275738378 | -0.878373 | 1.28E-05 | hypomethylated |
| cg23656110 | 0.36617 | 0.199075135 | -0.879201 | 0.000335 | hypomethylated |
| cg14339466 | 0.68999 | 0.375103243 | -0.879288 | 3.30E-06 | hypomethylated |
| cg15127702 | 0.55154 | 0.299678378 | -0.880051 | 0.001466 | hypomethylated |
| cg00301239 | 0.24428 | 0.132718378 | -0.880168 | 0.000342 | hypomethylated |
| cg07551060 | 0.73009 | 0.396592973 | -0.880415 | 4.47E-05 | hypomethylated |
| cg02331830 | 0.51599 | 0.280287568 | -0.880435 | 0.000214 | hypomethylated |
| cg16933922 | 0.23614 | 0.12816     | -0.881696 | 8.42E-05 | hypomethylated |

|            |         |             |           |          |                |
|------------|---------|-------------|-----------|----------|----------------|
| cg20266715 | 0.63756 | 0.345987568 | -0.881841 | 6.39E-06 | hypomethylated |
| cg14731462 | 0.69023 | 0.374447027 | -0.882316 | 0.000135 | hypomethylated |
| cg04719574 | 0.34474 | 0.187014595 | -0.882358 | 0.004691 | hypomethylated |
| cg27113419 | 0.48927 | 0.265408649 | -0.882415 | 8.94E-05 | hypomethylated |
| cg01535567 | 0.21229 | 0.115144324 | -0.882593 | 0.000445 | hypomethylated |
| cg01303372 | 0.67922 | 0.368371351 | -0.882718 | 0.000575 | hypomethylated |
| cg10795659 | 0.5642  | 0.305801081 | -0.883613 | 0.003255 | hypomethylated |
| cg00146645 | 0.32353 | 0.175337838 | -0.883762 | 0.000718 | hypomethylated |
| cg07267600 | 0.36044 | 0.195286486 | -0.884167 | 0.000293 | hypomethylated |
| cg01612140 | 0.61915 | 0.335443784 | -0.884218 | 0.000122 | hypomethylated |
| cg09516200 | 0.64152 | 0.347543243 | -0.884302 | 8.03E-05 | hypomethylated |
| cg16033151 | 0.42803 | 0.231680541 | -0.885575 | 5.06E-05 | hypomethylated |
| cg13480493 | 0.56199 | 0.30396     | -0.886663 | 0.002007 | hypomethylated |
| cg09501687 | 0.60451 | 0.326931892 | -0.886776 | 0.001314 | hypomethylated |
| cg25816127 | 0.32146 | 0.173809189 | -0.887135 | 0.008348 | hypomethylated |
| cg18041642 | 0.59564 | 0.321971892 | -0.887506 | 0.000127 | hypomethylated |
| cg23172671 | 0.70803 | 0.382565946 | -0.888102 | 9.82E-06 | hypomethylated |
| cg06834637 | 0.34876 | 0.188404324 | -0.888403 | 0.000219 | hypomethylated |
| cg14982472 | 0.4096  | 0.221242703 | -0.888586 | 0.005411 | hypomethylated |
| cg02836864 | 0.31635 | 0.170813514 | -0.889099 | 0.0003   | hypomethylated |
| cg14032089 | 0.45186 | 0.243965405 | -0.889199 | 0.000159 | hypomethylated |
| cg04339837 | 0.31747 | 0.171365405 | -0.889544 | 0.004059 | hypomethylated |
| cg04654167 | 0.44143 | 0.238162162 | -0.89024  | 5.45E-05 | hypomethylated |
| cg04770088 | 0.45107 | 0.243107568 | -0.891757 | 0.002574 | hypomethylated |
| cg07220903 | 0.56974 | 0.307027027 | -0.891938 | 0.000506 | hypomethylated |
| cg08918658 | 0.37449 | 0.201797297 | -0.89202  | 0.000523 | hypomethylated |
| cg04223548 | 0.53853 | 0.29019027  | -0.892028 | 0.000135 | hypomethylated |
| cg21201401 | 0.72607 | 0.391238919 | -0.892059 | 0.000408 | hypomethylated |
| cg15186638 | 0.28078 | 0.151296757 | -0.892059 | 0.000287 | hypomethylated |
| cg09159452 | 0.78264 | 0.421700541 | -0.89213  | 2.27E-05 | hypomethylated |
| cg02276807 | 0.65042 | 0.350438919 | -0.892209 | 5.32E-05 | hypomethylated |
| cg14129735 | 0.37848 | 0.203914054 | -0.892256 | 0.004326 | hypomethylated |
| cg23729881 | 0.46501 | 0.250522162 | -0.892324 | 0.002965 | hypomethylated |
| cg00691874 | 0.6102  | 0.328678378 | -0.892606 | 5.19E-05 | hypomethylated |
| cg03048889 | 0.30319 | 0.163268649 | -0.892974 | 0.018773 | hypomethylated |
| cg10462187 | 0.57325 | 0.308663243 | -0.893131 | 3.49E-06 | hypomethylated |
| cg14753356 | 0.50395 | 0.271201081 | -0.893918 | 0.000174 | hypomethylated |
| cg24862514 | 0.26497 | 0.142576757 | -0.89409  | 0.000848 | hypomethylated |
| cg19257864 | 0.22872 | 0.123022703 | -0.894658 | 0.000189 | hypomethylated |
| cg09668030 | 0.50732 | 0.272856216 | -0.894755 | 0.006796 | hypomethylated |
| cg04186657 | 0.20356 | 0.10948     | -0.894787 | 0.008208 | hypomethylated |
| cg05133205 | 0.46346 | 0.249172973 | -0.895297 | 0.000126 | hypomethylated |
| cg25755851 | 0.41095 | 0.220929189 | -0.895379 | 7.12E-05 | hypomethylated |
| cg25067702 | 0.50036 | 0.268943784 | -0.895662 | 0.00049  | hypomethylated |
| cg13709639 | 0.23715 | 0.127467568 | -0.89567  | 0.000148 | hypomethylated |
| cg15646741 | 0.57946 | 0.311285405 | -0.896471 | 0.000163 | hypomethylated |
| cg17967818 | 0.30668 | 0.164747568 | -0.896477 | 0.000126 | hypomethylated |
| cg14606858 | 0.53449 | 0.28712     | -0.896509 | 0.000464 | hypomethylated |
| cg04324276 | 0.35228 | 0.189220541 | -0.896654 | 0.000148 | hypomethylated |
| cg03611598 | 0.19728 | 0.105960541 | -0.896718 | 0.002599 | hypomethylated |
| cg14396008 | 0.40253 | 0.216129189 | -0.897202 | 0.000681 | hypomethylated |
| cg00073090 | 0.42996 | 0.230826486 | -0.897394 | 0.000104 | hypomethylated |
| cg19069346 | 0.22346 | 0.119958378 | -0.897483 | 0.000501 | hypomethylated |
| cg01904393 | 0.30602 | 0.164243243 | -0.897792 | 7.12E-05 | hypomethylated |
| cg18582260 | 0.69237 | 0.37139027  | -0.898607 | 0.000342 | hypomethylated |
| cg10416784 | 0.65395 | 0.350662162 | -0.899099 | 8.60E-06 | hypomethylated |
| cg13921921 | 0.47152 | 0.252797838 | -0.899335 | 0.000145 | hypomethylated |
| cg27628707 | 0.38867 | 0.208362162 | -0.899452 | 0.006068 | hypomethylated |

|            |         |             |           |          |                |
|------------|---------|-------------|-----------|----------|----------------|
| cg20881888 | 0.36127 | 0.193604324 | -0.899966 | 0.00071  | hypomethylated |
| cg15420926 | 0.36921 | 0.197825405 | -0.900214 | 7.29E-05 | hypomethylated |
| cg13581922 | 0.43669 | 0.233950811 | -0.900404 | 0.000756 | hypomethylated |
| cg03037030 | 0.51555 | 0.276081622 | -0.901017 | 0.000485 | hypomethylated |
| cg17534029 | 0.55493 | 0.297040541 | -0.901646 | 0.001052 | hypomethylated |
| cg11606261 | 0.63814 | 0.341551892 | -0.901768 | 0.000104 | hypomethylated |
| cg11993160 | 0.3172  | 0.169761081 | -0.901887 | 8.03E-05 | hypomethylated |
| cg14102437 | 0.49792 | 0.266474054 | -0.901919 | 0.000187 | hypomethylated |
| cg11640208 | 0.46017 | 0.246247568 | -0.902057 | 0.00134  | hypomethylated |
| cg06105296 | 0.37707 | 0.201709189 | -0.902556 | 0.002274 | hypomethylated |
| cg26395331 | 0.37186 | 0.19892     | -0.902571 | 0.00032  | hypomethylated |
| cg01928076 | 0.30232 | 0.161695676 | -0.902795 | 0.000501 | hypomethylated |
| cg20365336 | 0.43034 | 0.230005946 | -0.903806 | 0.005706 | hypomethylated |
| cg10020892 | 0.56376 | 0.301204324 | -0.904339 | 0.000306 | hypomethylated |
| cg03554573 | 0.57558 | 0.307481622 | -0.904516 | 0.000931 | hypomethylated |
| cg06665622 | 0.6624  | 0.353856757 | -0.904537 | 1.51E-06 | hypomethylated |
| cg14815361 | 0.74807 | 0.399607568 | -0.904589 | 8.60E-06 | hypomethylated |
| cg07313319 | 0.42284 | 0.225855676 | -0.904711 | 0.000134 | hypomethylated |
| cg00667789 | 0.26113 | 0.139446486 | -0.905057 | 0.000523 | hypomethylated |
| cg21873674 | 0.29979 | 0.160087027 | -0.905096 | 0.001288 | hypomethylated |
| cg06051311 | 0.63997 | 0.341459459 | -0.90629  | 3.32E-05 | hypomethylated |
| cg23451678 | 0.36998 | 0.197386486 | -0.906424 | 0.002649 | hypomethylated |
| cg23340505 | 0.38011 | 0.202778378 | -0.906513 | 0.00101  | hypomethylated |
| cg24146125 | 0.41939 | 0.223707568 | -0.906678 | 0.000342 | hypomethylated |
| cg11334730 | 0.53653 | 0.286097838 | -0.90715  | 2.32E-05 | hypomethylated |
| cg27183030 | 0.24082 | 0.128408649 | -0.907213 | 0.002599 | hypomethylated |
| cg12679308 | 0.36654 | 0.195376757 | -0.907712 | 0.003316 | hypomethylated |
| cg23425762 | 0.47962 | 0.25554973  | -0.908288 | 0.008636 | hypomethylated |
| cg16647844 | 0.37599 | 0.200295676 | -0.908563 | 0.000875 | hypomethylated |
| cg06085204 | 0.4595  | 0.244762703 | -0.908681 | 0.002189 | hypomethylated |
| cg21625464 | 0.2064  | 0.109904324 | -0.909195 | 0.004608 | hypomethylated |
| cg07739369 | 0.50667 | 0.269790811 | -0.909205 | 5.65E-05 | hypomethylated |
| cg02793828 | 0.63333 | 0.33709027  | -0.909822 | 4.05E-05 | hypomethylated |
| cg02319354 | 0.37163 | 0.197781622 | -0.909959 | 0.001603 | hypomethylated |
| cg06401414 | 0.46749 | 0.248791892 | -0.909996 | 4.73E-06 | hypomethylated |
| cg03590237 | 0.40771 | 0.21696973  | -0.91005  | 0.000551 | hypomethylated |
| cg11462533 | 0.29904 | 0.159087568 | -0.910517 | 0.001176 | hypomethylated |
| cg08730348 | 0.41706 | 0.221857297 | -0.910623 | 0.002699 | hypomethylated |
| cg03364486 | 0.6526  | 0.347111351 | -0.9108   | 0.000251 | hypomethylated |
| cg17490196 | 0.53485 | 0.284427027 | -0.911076 | 0.000148 | hypomethylated |
| cg07563611 | 0.7832  | 0.416296216 | -0.91177  | 6.22E-06 | hypomethylated |
| cg08752433 | 0.72062 | 0.382999459 | -0.911896 | 5.58E-06 | hypomethylated |
| cg26835302 | 0.52641 | 0.279721081 | -0.912198 | 0.000626 | hypomethylated |
| cg03852144 | 0.57279 | 0.304164324 | -0.913155 | 0.003506 | hypomethylated |
| cg20970886 | 0.80219 | 0.425944865 | -0.913277 | 6.39E-06 | hypomethylated |
| cg14602087 | 0.59317 | 0.314904865 | -0.91353  | 0.000123 | hypomethylated |
| cg26400954 | 0.79345 | 0.421168649 | -0.913741 | 8.60E-06 | hypomethylated |
| cg22301854 | 0.37537 | 0.199216757 | -0.913974 | 0.000501 | hypomethylated |
| cg24910675 | 0.29226 | 0.155092432 | -0.914124 | 0.005656 | hypomethylated |
| cg26940518 | 0.23712 | 0.125757838 | -0.914969 | 0.003986 | hypomethylated |
| cg12787405 | 0.3266  | 0.173139459 | -0.91559  | 0.000607 | hypomethylated |
| cg10574566 | 0.32389 | 0.171699459 | -0.915618 | 0.000163 | hypomethylated |
| cg26856257 | 0.42841 | 0.227019459 | -0.916176 | 0.00044  | hypomethylated |
| cg00980058 | 0.4838  | 0.256332432 | -0.916395 | 0.000195 | hypomethylated |
| cg13427361 | 0.64035 | 0.339264324 | -0.916451 | 0.000365 | hypomethylated |
| cg26788216 | 0.50502 | 0.267547027 | -0.916548 | 0.000112 | hypomethylated |
| cg07962303 | 0.37372 | 0.197957838 | -0.916765 | 0.0003   | hypomethylated |
| cg00733978 | 0.70423 | 0.373024865 | -0.916775 | 1.25E-05 | hypomethylated |



|            |         |             |           |          |                |
|------------|---------|-------------|-----------|----------|----------------|
| cg16472904 | 0.57064 | 0.302248108 | -0.916848 | 2.64E-05 | hypomethylated |
| cg12737497 | 0.29359 | 0.155488649 | -0.916994 | 0.000365 | hypomethylated |
| cg05514299 | 0.65767 | 0.348246486 | -0.917255 | 3.49E-05 | hypomethylated |
| cg23739746 | 0.52987 | 0.280573514 | -0.91726  | 0.001651 | hypomethylated |
| cg11108890 | 0.33287 | 0.176133514 | -0.918289 | 8.94E-05 | hypomethylated |
| cg03081478 | 0.44365 | 0.234725405 | -0.918448 | 0.000435 | hypomethylated |
| cg01120308 | 0.33251 | 0.175907027 | -0.918585 | 0.000209 | hypomethylated |
| cg10316899 | 0.70346 | 0.372095676 | -0.918795 | 5.43E-06 | hypomethylated |
| cg09033006 | 0.46271 | 0.244669189 | -0.919276 | 9.38E-05 | hypomethylated |
| cg09183124 | 0.61096 | 0.323008649 | -0.919505 | 0.000274 | hypomethylated |
| cg04990202 | 0.67923 | 0.35877027  | -0.92084  | 4.94E-05 | hypomethylated |
| cg11201447 | 0.74133 | 0.391380541 | -0.921544 | 4.82E-05 | hypomethylated |
| cg01738022 | 0.49738 | 0.262496216 | -0.922052 | 0.023591 | hypomethylated |
| cg04293307 | 0.4839  | 0.255283243 | -0.92261  | 2.39E-05 | hypomethylated |
| cg14130039 | 0.34882 | 0.18401027  | -0.922696 | 9.83E-05 | hypomethylated |
| cg08892236 | 0.26918 | 0.141868649 | -0.924015 | 0.004526 | hypomethylated |
| cg19769182 | 0.19697 | 0.103810811 | -0.924019 | 0.000408 | hypomethylated |
| cg02097203 | 0.50624 | 0.266742162 | -0.924376 | 0.000569 | hypomethylated |
| cg14901243 | 0.63765 | 0.335975676 | -0.924408 | 5.19E-05 | hypomethylated |
| cg14511923 | 0.64989 | 0.342372432 | -0.924629 | 0.00024  | hypomethylated |
| cg14174912 | 0.45313 | 0.238692973 | -0.924769 | 0.001667 | hypomethylated |
| cg13266096 | 0.31166 | 0.164157838 | -0.924889 | 0.002751 | hypomethylated |
| cg14106046 | 0.57115 | 0.300775676 | -0.925182 | 0.000703 | hypomethylated |
| cg04276626 | 0.56452 | 0.297282703 | -0.925189 | 1.84E-05 | hypomethylated |
| cg15601264 | 0.49972 | 0.263136216 | -0.92531  | 0.000374 | hypomethylated |
| cg20034617 | 0.36904 | 0.19424973  | -0.925865 | 0.003136 | hypomethylated |
| cg11219400 | 0.28993 | 0.152581622 | -0.926123 | 0.002599 | hypomethylated |
| cg18650367 | 0.38067 | 0.200332432 | -0.926145 | 0.000226 | hypomethylated |
| cg05726195 | 0.39632 | 0.208541081 | -0.926334 | 0.007282 | hypomethylated |
| cg14679780 | 0.52204 | 0.274629189 | -0.926675 | 0.00028  | hypomethylated |
| cg05288172 | 0.56375 | 0.296415135 | -0.927436 | 0.000101 | hypomethylated |
| cg09552548 | 0.60174 | 0.316370811 | -0.927524 | 0.000107 | hypomethylated |
| cg23526474 | 0.31501 | 0.165608108 | -0.927624 | 0.0017   | hypomethylated |
| cg24876187 | 0.50505 | 0.265511351 | -0.927653 | 0.000893 | hypomethylated |
| cg24605325 | 0.26525 | 0.139434595 | -0.927764 | 0.00066  | hypomethylated |
| cg19061690 | 0.35218 | 0.185115676 | -0.927886 | 0.000374 | hypomethylated |
| cg12686441 | 0.63394 | 0.333214054 | -0.927897 | 8.63E-05 | hypomethylated |
| cg02849956 | 0.59424 | 0.312176216 | -0.928685 | 5.19E-05 | hypomethylated |
| cg19131731 | 0.40468 | 0.212515676 | -0.929212 | 0.000528 | hypomethylated |
| cg12799029 | 0.22351 | 0.117363784 | -0.929352 | 0.001556 | hypomethylated |
| cg27268352 | 0.59509 | 0.312430811 | -0.929571 | 1.31E-05 | hypomethylated |
| cg02822788 | 0.40973 | 0.21511027  | -0.929597 | 0.000365 | hypomethylated |
| cg21241823 | 0.51137 | 0.268454595 | -0.929689 | 0.00013  | hypomethylated |
| cg07638935 | 0.45233 | 0.237445946 | -0.929777 | 0.000454 | hypomethylated |
| cg23684410 | 0.41572 | 0.218095676 | -0.930651 | 3.27E-05 | hypomethylated |
| cg11505417 | 0.34495 | 0.180959459 | -0.930721 | 0.003255 | hypomethylated |
| cg10784519 | 0.25084 | 0.131551892 | -0.931135 | 0.00341  | hypomethylated |
| cg17415265 | 0.56271 | 0.295072432 | -0.931322 | 0.001949 | hypomethylated |
| cg05906166 | 0.47647 | 0.249808108 | -0.931565 | 0.000857 | hypomethylated |
| cg26579713 | 0.61268 | 0.321203243 | -0.931647 | 0.00113  | hypomethylated |
| cg16355945 | 0.24318 | 0.127455135 | -0.932035 | 0.00044  | hypomethylated |
| cg03850117 | 0.42177 | 0.220833514 | -0.933497 | 8.03E-05 | hypomethylated |
| cg05870586 | 0.59245 | 0.310141081 | -0.933769 | 2.10E-05 | hypomethylated |
| cg01556706 | 0.58501 | 0.306008649 | -0.934889 | 0.000126 | hypomethylated |
| cg20852851 | 0.88723 | 0.464057838 | -0.935004 | 3.12E-06 | hypomethylated |
| cg13606889 | 0.44246 | 0.231347027 | -0.935488 | 7.65E-05 | hypomethylated |
| cg24680129 | 0.33668 | 0.176014595 | -0.935683 | 0.000174 | hypomethylated |
| cg10503655 | 0.28909 | 0.151067027 | -0.93633  | 1.58E-05 | hypomethylated |

|            |         |             |           |          |                |
|------------|---------|-------------|-----------|----------|----------------|
| cg14369648 | 0.41478 | 0.216627027 | -0.937133 | 0.002189 | hypomethylated |
| cg07165167 | 0.39772 | 0.207644865 | -0.937635 | 0.000749 | hypomethylated |
| cg14289469 | 0.32827 | 0.171265946 | -0.938645 | 4.94E-05 | hypomethylated |
| cg11429044 | 0.54006 | 0.281742703 | -0.938741 | 0.000789 | hypomethylated |
| cg15068733 | 0.3206  | 0.167239459 | -0.938859 | 0.001212 | hypomethylated |
| cg13058623 | 0.45768 | 0.238655676 | -0.939409 | 4.05E-05 | hypomethylated |
| cg23252902 | 0.28869 | 0.150502703 | -0.939732 | 0.004526 | hypomethylated |
| cg17252884 | 0.53243 | 0.277556757 | -0.939809 | 0.001052 | hypomethylated |
| cg08123444 | 0.68993 | 0.359574054 | -0.940161 | 0.000155 | hypomethylated |
| cg15628518 | 0.56791 | 0.295975676 | -0.940184 | 6.78E-05 | hypomethylated |
| cg23202253 | 0.61349 | 0.319725405 | -0.940206 | 1.01E-05 | hypomethylated |
| cg17178175 | 0.56023 | 0.291904324 | -0.940524 | 0.000435 | hypomethylated |
| cg11118962 | 0.42131 | 0.219514595 | -0.940565 | 0.000221 | hypomethylated |
| cg06075311 | 0.46822 | 0.243856216 | -0.941156 | 0.00095  | hypomethylated |
| cg18956547 | 0.48757 | 0.253932432 | -0.941165 | 0.0003   | hypomethylated |
| cg23792308 | 0.39084 | 0.203552432 | -0.941178 | 0.000426 | hypomethylated |
| cg16783186 | 0.60404 | 0.314534595 | -0.941425 | 8.63E-05 | hypomethylated |
| cg22908423 | 0.4631  | 0.241135135 | -0.941482 | 3.23E-05 | hypomethylated |
| cg23452752 | 0.31511 | 0.163976757 | -0.942364 | 0.000117 | hypomethylated |
| cg08169827 | 0.39733 | 0.206736216 | -0.942547 | 0.000839 | hypomethylated |
| cg16983159 | 0.50921 | 0.264859459 | -0.943034 | 0.002106 | hypomethylated |
| cg10255237 | 0.61759 | 0.321206486 | -0.943148 | 0.000426 | hypomethylated |
| cg12526997 | 0.64885 | 0.337438919 | -0.943259 | 0.000459 | hypomethylated |
| cg10987840 | 0.60805 | 0.315989189 | -0.944315 | 1.75E-05 | hypomethylated |
| cg16316624 | 0.40929 | 0.212569189 | -0.945191 | 0.000358 | hypomethylated |
| cg11549025 | 0.52796 | 0.274130811 | -0.945564 | 0.000256 | hypomethylated |
| cg16809762 | 0.57055 | 0.296062703 | -0.946451 | 6.57E-06 | hypomethylated |
| cg23662097 | 0.52721 | 0.273480541 | -0.94694  | 0.002455 | hypomethylated |
| cg00293245 | 0.22493 | 0.116657838 | -0.947193 | 0.001288 | hypomethylated |
| cg08461352 | 0.52028 | 0.269819459 | -0.947294 | 2.95E-06 | hypomethylated |
| cg19770281 | 0.33576 | 0.174025946 | -0.948128 | 0.000581 | hypomethylated |
| cg12363375 | 0.22273 | 0.115401622 | -0.948632 | 0.000417 | hypomethylated |
| cg24722577 | 0.64167 | 0.332420541 | -0.948822 | 0.000653 | hypomethylated |
| cg02273436 | 0.5459  | 0.282788108 | -0.948915 | 0.000287 | hypomethylated |
| cg05376228 | 0.49194 | 0.254726486 | -0.949533 | 7.12E-05 | hypomethylated |
| cg22367310 | 0.44199 | 0.228845946 | -0.949637 | 0.000528 | hypomethylated |
| cg06142351 | 0.41463 | 0.214622162 | -0.950025 | 0.003637 | hypomethylated |
| cg09853702 | 0.60662 | 0.313662703 | -0.951579 | 0.000115 | hypomethylated |
| cg26203879 | 0.35768 | 0.184863243 | -0.952211 | 0.000435 | hypomethylated |
| cg08823209 | 0.52206 | 0.269770811 | -0.952481 | 1.08E-05 | hypomethylated |
| cg26928531 | 0.31931 | 0.164983243 | -0.952638 | 0.000588 | hypomethylated |
| cg00542992 | 0.52722 | 0.272338919 | -0.953002 | 2.45E-05 | hypomethylated |
| cg03568017 | 0.30047 | 0.155042703 | -0.954555 | 0.008069 | hypomethylated |
| cg03454663 | 0.42836 | 0.22102973  | -0.954583 | 4.15E-05 | hypomethylated |
| cg24082121 | 0.26531 | 0.136771351 | -0.955913 | 0.001031 | hypomethylated |
| cg04691781 | 0.31212 | 0.160761081 | -0.957183 | 0.007035 | hypomethylated |
| cg13029400 | 0.45365 | 0.233653514 | -0.957209 | 0.000268 | hypomethylated |
| cg08305942 | 0.70218 | 0.361592973 | -0.957474 | 6.22E-06 | hypomethylated |
| cg27413008 | 0.43542 | 0.224017297 | -0.958798 | 0.000931 | hypomethylated |
| cg16719560 | 0.37204 | 0.191285405 | -0.959731 | 0.000163 | hypomethylated |
| cg04155862 | 0.22788 | 0.117158919 | -0.959808 | 0.000219 | hypomethylated |
| cg16094145 | 0.31932 | 0.164111892 | -0.960323 | 0.000454 | hypomethylated |
| cg16596317 | 0.75024 | 0.385563243 | -0.960385 | 1.09E-05 | hypomethylated |
| cg18693822 | 0.66515 | 0.341631892 | -0.961237 | 2.07E-05 | hypomethylated |
| cg16072777 | 0.40168 | 0.206237297 | -0.961741 | 0.001481 | hypomethylated |
| cg14115597 | 0.69804 | 0.358390811 | -0.961776 | 7.12E-06 | hypomethylated |
| cg17922998 | 0.61639 | 0.316406486 | -0.962064 | 0.000129 | hypomethylated |
| cg04452095 | 0.38146 | 0.195801081 | -0.962143 | 8.84E-05 | hypomethylated |

|               |         |             |           |          |                |
|---------------|---------|-------------|-----------|----------|----------------|
| cg10338787    | 0.21622 | 0.110963784 | -0.962411 | 0.000126 | hypomethylated |
| cg17972655    | 0.31434 | 0.161309189 | -0.962497 | 0.000143 | hypomethylated |
| cg03532331    | 0.39471 | 0.202535676 | -0.962617 | 0.00032  | hypomethylated |
| cg14856585    | 0.21484 | 0.110235676 | -0.962671 | 0.000921 | hypomethylated |
| cg17614506    | 0.24464 | 0.125511351 | -0.962842 | 3.67E-05 | hypomethylated |
| cg21196487    | 0.29984 | 0.153722703 | -0.963863 | 0.000193 | hypomethylated |
| cg09072560    | 0.38804 | 0.198892432 | -0.964217 | 0.001074 | hypomethylated |
| cg03402605    | 0.32633 | 0.167196757 | -0.964785 | 0.005223 | hypomethylated |
| cg16396284    | 0.43461 | 0.222663784 | -0.964854 | 0.012036 | hypomethylated |
| cg13417862    | 0.3909  | 0.200248108 | -0.965011 | 0.001237 | hypomethylated |
| cg21243631    | 0.48741 | 0.249535676 | -0.96589  | 5.72E-05 | hypomethylated |
| cg02072495    | 0.28485 | 0.145816216 | -0.966051 | 0.001096 | hypomethylated |
| cg09730500    | 0.43898 | 0.224661081 | -0.966405 | 0.000123 | hypomethylated |
| cg16736018    | 0.42949 | 0.219673514 | -0.967264 | 0.000399 | hypomethylated |
| cg20606255    | 0.22452 | 0.114775135 | -0.968034 | 0.001481 | hypomethylated |
| cg12903224    | 0.37631 | 0.192344865 | -0.968226 | 0.000219 | hypomethylated |
| cg02578087    | 0.71173 | 0.363767568 | -0.968313 | 2.71E-05 | hypomethylated |
| cg09988805    | 0.6966  | 0.356023784 | -0.968357 | 2.64E-06 | hypomethylated |
| cg19918734    | 0.42962 | 0.219520541 | -0.968705 | 0.001141 | hypomethylated |
| cg26348487    | 0.54942 | 0.280727027 | -0.968741 | 0.00099  | hypomethylated |
| cg14552947    | 0.61649 | 0.314767027 | -0.969793 | 0.001052 | hypomethylated |
| cg01246622    | 0.52018 | 0.265468108 | -0.970472 | 0.000726 | hypomethylated |
| cg03598112    | 0.55306 | 0.282244865 | -0.970489 | 0.000594 | hypomethylated |
| cg05903736    | 0.56934 | 0.290368108 | -0.971407 | 3.81E-05 | hypomethylated |
| cg09535960    | 0.40427 | 0.206082162 | -0.9721   | 0.005706 | hypomethylated |
| cg24067911    | 0.68755 | 0.350412973 | -0.972408 | 2.87E-06 | hypomethylated |
| cg27144670    | 0.73061 | 0.372303784 | -0.972621 | 3.79E-06 | hypomethylated |
| cg17329164    | 0.31142 | 0.158680541 | -0.972736 | 0.000262 | hypomethylated |
| cg17745097    | 0.38788 | 0.197631892 | -0.972795 | 0.001893 | hypomethylated |
| cg17715243    | 0.55062 | 0.280545946 | -0.97282  | 5.32E-05 | hypomethylated |
| cg13036352    | 0.36563 | 0.186258378 | -0.973079 | 0.018773 | hypomethylated |
| cg04888360    | 0.46982 | 0.239331351 | -0.973099 | 5.81E-06 | hypomethylated |
| cg02225720    | 0.64513 | 0.328456216 | -0.973889 | 0.000772 | hypomethylated |
| cg21130374    | 0.57006 | 0.290192973 | -0.974101 | 0.00421  | hypomethylated |
| cg01777397    | 0.30411 | 0.154801622 | -0.974173 | 0.001556 | hypomethylated |
| cg03189210    | 0.42107 | 0.214321081 | -0.974286 | 0.006015 | hypomethylated |
| cg13052638    | 0.63321 | 0.32220973  | -0.974684 | 0.000126 | hypomethylated |
| ch.6.2925136R | 0.25122 | 0.127789189 | -0.975186 | 0.000358 | hypomethylated |
| cg11496630    | 0.38741 | 0.197003784 | -0.975638 | 0.007933 | hypomethylated |
| cg02858512    | 0.46548 | 0.236697838 | -0.975673 | 0.004776 | hypomethylated |
| cg27005749    | 0.64234 | 0.326511892 | -0.976202 | 0.000365 | hypomethylated |
| cg27001715    | 0.53465 | 0.271695135 | -0.976606 | 8.22E-05 | hypomethylated |
| cg13432339    | 0.47962 | 0.243717838 | -0.97668  | 0.000145 | hypomethylated |
| cg03624316    | 0.55189 | 0.280361081 | -0.977095 | 1.94E-05 | hypomethylated |
| cg07186138    | 0.35724 | 0.181447568 | -0.977341 | 0.00421  | hypomethylated |
| cg10574006    | 0.75049 | 0.381048108 | -0.97786  | 2.87E-06 | hypomethylated |
| cg06946797    | 0.53513 | 0.271657297 | -0.978102 | 0.000646 | hypomethylated |
| cg01174264    | 0.41172 | 0.208987027 | -0.97825  | 5.65E-05 | hypomethylated |
| cg05675514    | 0.3516  | 0.178463243 | -0.978308 | 0.002147 | hypomethylated |
| cg26666580    | 0.30372 | 0.154006486 | -0.979751 | 0.000633 | hypomethylated |
| cg15819128    | 0.58525 | 0.296625405 | -0.980411 | 0.001141 | hypomethylated |
| cg15391590    | 0.65602 | 0.332447027 | -0.980615 | 0.00017  | hypomethylated |
| cg05429895    | 0.34017 | 0.17224973  | -0.981754 | 0.001237 | hypomethylated |
| cg03096126    | 0.39832 | 0.201663243 | -0.98198  | 0.002106 | hypomethylated |
| cg01077100    | 0.68944 | 0.348863784 | -0.982761 | 3.85E-05 | hypomethylated |
| cg09791621    | 0.57417 | 0.290507568 | -0.982902 | 0.000857 | hypomethylated |
| cg18335931    | 0.31278 | 0.158245946 | -0.98298  | 0.000126 | hypomethylated |
| cg14251009    | 0.58411 | 0.295415676 | -0.983494 | 0.00255  | hypomethylated |

|            |         |             |           |          |                |
|------------|---------|-------------|-----------|----------|----------------|
| cg21110456 | 0.43082 | 0.217836216 | -0.983841 | 0.002777 | hypomethylated |
| cg14654171 | 0.40111 | 0.202795135 | -0.983975 | 0.000234 | hypomethylated |
| cg12560128 | 0.46838 | 0.236712432 | -0.984544 | 0.001368 | hypomethylated |
| cg14276379 | 0.51253 | 0.25898973  | -0.984742 | 0.00032  | hypomethylated |
| cg22207139 | 0.61731 | 0.311917838 | -0.984829 | 5.00E-06 | hypomethylated |
| cg23066280 | 0.70362 | 0.355437297 | -0.985201 | 0.000667 | hypomethylated |
| cg01826354 | 0.47797 | 0.241436757 | -0.985275 | 0.00099  | hypomethylated |
| cg03667317 | 0.3228  | 0.163034595 | -0.985462 | 0.000495 | hypomethylated |
| cg21323720 | 0.56026 | 0.282911892 | -0.985744 | 0.000138 | hypomethylated |
| cg02923485 | 0.57519 | 0.290399459 | -0.986    | 2.36E-06 | hypomethylated |
| cg02227496 | 0.40032 | 0.202049189 | -0.986447 | 0.001052 | hypomethylated |
| cg14292522 | 0.46867 | 0.236517838 | -0.986623 | 5.06E-05 | hypomethylated |
| cg02482460 | 0.22705 | 0.114556757 | -0.986947 | 0.001096 | hypomethylated |
| cg08357990 | 0.29665 | 0.149616757 | -0.98749  | 0.000145 | hypomethylated |
| cg04465078 | 0.46926 | 0.236655135 | -0.987601 | 0.000563 | hypomethylated |
| cg11303839 | 0.6876  | 0.346749189 | -0.987677 | 0.000219 | hypomethylated |
| cg05471169 | 0.45527 | 0.229347027 | -0.98919  | 0.003705 | hypomethylated |
| cg04633683 | 0.54675 | 0.275278919 | -0.989987 | 7.65E-05 | hypomethylated |
| cg14415629 | 0.33531 | 0.168791892 | -0.99025  | 9.49E-05 | hypomethylated |
| cg01238435 | 0.70792 | 0.356296216 | -0.990509 | 2.89E-05 | hypomethylated |
| cg04821520 | 0.47674 | 0.239844324 | -0.991104 | 0.000129 | hypomethylated |
| cg15832662 | 0.28905 | 0.145168649 | -0.993589 | 0.000204 | hypomethylated |
| cg01862311 | 0.69322 | 0.347955135 | -0.994412 | 2.92E-05 | hypomethylated |
| cg23238834 | 0.34219 | 0.171745405 | -0.994526 | 0.001786 | hypomethylated |
| cg19308375 | 0.50649 | 0.254175676 | -0.994708 | 0.006564 | hypomethylated |
| cg11533712 | 0.51514 | 0.25849027  | -0.994855 | 2.04E-05 | hypomethylated |
| cg09255732 | 0.40063 | 0.200923784 | -0.995622 | 0.005706 | hypomethylated |
| cg21197336 | 0.70059 | 0.351291892 | -0.9959   | 4.88E-05 | hypomethylated |
| cg16407699 | 0.60488 | 0.303265405 | -0.996068 | 0.000123 | hypomethylated |
| cg08063160 | 0.27031 | 0.135495676 | -0.996368 | 4.24E-06 | hypomethylated |
| cg06485603 | 0.2574  | 0.128915676 | -0.997584 | 0.000613 | hypomethylated |
| cg25753473 | 0.54838 | 0.274527568 | -0.998225 | 0.000772 | hypomethylated |
| cg27139419 | 0.55304 | 0.276775135 | -0.998669 | 3.95E-05 | hypomethylated |
| cg13414270 | 0.52476 | 0.26248973  | -0.999397 | 0.000262 | hypomethylated |
| cg07248223 | 0.66147 | 0.330798919 | -0.999721 | 0.001141 | hypomethylated |
| cg04111435 | 0.2243  | 0.112140541 | -1.000122 | 0.000374 | hypomethylated |
| cg11906021 | 0.61767 | 0.30876     | -1.00035  | 8.60E-06 | hypomethylated |
| cg25979108 | 0.22653 | 0.113216757 | -1.000615 | 0.000253 | hypomethylated |
| cg13780718 | 0.61671 | 0.308212432 | -1.000667 | 0.000399 | hypomethylated |
| cg20518446 | 0.73593 | 0.367522703 | -1.001735 | 0.000109 | hypomethylated |
| cg17837069 | 0.28854 | 0.144084865 | -1.001853 | 0.000857 | hypomethylated |
| cg09287864 | 0.67989 | 0.339475676 | -1.001993 | 0.000182 | hypomethylated |
| cg20003368 | 0.43901 | 0.219099459 | -1.002668 | 0.003347 | hypomethylated |
| cg17644208 | 0.33372 | 0.166518378 | -1.002957 | 0.000613 | hypomethylated |
| cg14661886 | 0.22513 | 0.112334054 | -1.002963 | 0.003914 | hypomethylated |
| cg12394201 | 0.53057 | 0.264716216 | -1.003097 | 4.05E-05 | hypomethylated |
| cg21568661 | 0.45958 | 0.229156216 | -1.003985 | 6.15E-05 | hypomethylated |
| cg09960641 | 0.52947 | 0.263909189 | -1.004507 | 1.66E-05 | hypomethylated |
| cg22177308 | 0.75473 | 0.375996757 | -1.00524  | 1.88E-06 | hypomethylated |
| cg01141339 | 0.39576 | 0.196996757 | -1.006454 | 0.003195 | hypomethylated |
| cg25388882 | 0.57033 | 0.283872973 | -1.006551 | 5.14E-06 | hypomethylated |
| cg13942922 | 0.27921 | 0.138891892 | -1.007388 | 0.00064  | hypomethylated |
| cg00362657 | 0.46374 | 0.230660541 | -1.007545 | 0.011274 | hypomethylated |
| cg14356919 | 0.6447  | 0.320614595 | -1.007788 | 1.54E-06 | hypomethylated |
| cg23323669 | 0.3801  | 0.188797838 | -1.009537 | 0.000681 | hypomethylated |
| cg04937184 | 0.55453 | 0.275401622 | -1.009728 | 0.000152 | hypomethylated |
| cg26758857 | 0.24239 | 0.120351892 | -1.010071 | 0.001768 | hypomethylated |
| cg09782560 | 0.51372 | 0.255032432 | -1.010302 | 6.70E-05 | hypomethylated |

|            |         |             |           |          |                |
|------------|---------|-------------|-----------|----------|----------------|
| cg24438354 | 0.50152 | 0.248904865 | -1.010713 | 0.000287 | hypomethylated |
| cg07493562 | 0.38648 | 0.191757297 | -1.011112 | 3.40E-05 | hypomethylated |
| cg11935248 | 0.33797 | 0.167648108 | -1.011459 | 0.001164 | hypomethylated |
| cg04291025 | 0.28261 | 0.140124324 | -1.012105 | 0.000435 | hypomethylated |
| cg06021088 | 0.4897  | 0.24274973  | -1.012429 | 0.000174 | hypomethylated |
| cg23937993 | 0.32992 | 0.163537838 | -1.012492 | 0.00028  | hypomethylated |
| cg05398036 | 0.50539 | 0.250471892 | -1.012748 | 0.000214 | hypomethylated |
| cg12453905 | 0.29866 | 0.147955676 | -1.013339 | 0.004022 | hypomethylated |
| cg20803910 | 0.41783 | 0.206975135 | -1.013459 | 0.003986 | hypomethylated |
| cg01165043 | 0.3142  | 0.155626486 | -1.013596 | 0.00078  | hypomethylated |
| cg01261503 | 0.20266 | 0.100355135 | -1.013947 | 0.000123 | hypomethylated |
| cg19894975 | 0.19791 | 0.097952973 | -1.014683 | 0.001327 | hypomethylated |
| cg01425762 | 0.55211 | 0.273121081 | -1.015415 | 2.92E-05 | hypomethylated |
| cg06853894 | 0.59754 | 0.295575135 | -1.01551  | 5.06E-05 | hypomethylated |
| cg05151395 | 0.28408 | 0.14048     | -1.015933 | 0.003604 | hypomethylated |
| cg02544257 | 0.40494 | 0.200149189 | -1.016632 | 4.00E-05 | hypomethylated |
| cg19174643 | 0.55737 | 0.275483784 | -1.016668 | 0.000358 | hypomethylated |
| cg12592365 | 0.71661 | 0.354045405 | -1.017254 | 8.15E-06 | hypomethylated |
| cg02892153 | 0.33287 | 0.164395676 | -1.017787 | 9.83E-05 | hypomethylated |
| cg13067634 | 0.25039 | 0.123656757 | -1.017836 | 0.000224 | hypomethylated |
| cg06261066 | 0.47813 | 0.236105946 | -1.017969 | 0.001912 | hypomethylated |
| cg09884146 | 0.64142 | 0.316676216 | -1.018261 | 6.95E-05 | hypomethylated |
| cg05832051 | 0.32407 | 0.159995135 | -1.018277 | 0.001949 | hypomethylated |
| cg21365602 | 0.1515  | 0.074771351 | -1.01876  | 0.001074 | hypomethylated |
| cg15101245 | 0.32364 | 0.159704865 | -1.018982 | 0.000178 | hypomethylated |
| cg23271915 | 0.61957 | 0.305616216 | -1.019546 | 1.80E-05 | hypomethylated |
| cg16271437 | 0.19307 | 0.095013514 | -1.022919 | 0.001096 | hypomethylated |
| cg07541559 | 0.49749 | 0.24477027  | -1.023239 | 0.000148 | hypomethylated |
| cg23305899 | 0.69649 | 0.342628649 | -1.023457 | 9.31E-06 | hypomethylated |
| cg25450266 | 0.4407  | 0.216571892 | -1.024951 | 0.001603 | hypomethylated |
| cg25053413 | 0.31191 | 0.153231892 | -1.025413 | 0.004365 | hypomethylated |
| cg13454226 | 0.45967 | 0.225664324 | -1.02642  | 0.005131 | hypomethylated |
| cg17951878 | 0.62537 | 0.306931892 | -1.026791 | 0.000102 | hypomethylated |
| cg20618695 | 0.39967 | 0.196115135 | -1.027108 | 0.000374 | hypomethylated |
| cg13601855 | 0.30728 | 0.150754054 | -1.027357 | 0.000733 | hypomethylated |
| cg23720331 | 0.37906 | 0.185934595 | -1.027631 | 0.000358 | hypomethylated |
| cg04495354 | 0.70356 | 0.345047568 | -1.027878 | 4.05E-05 | hypomethylated |
| cg09451215 | 0.47799 | 0.234312432 | -1.028547 | 0.000287 | hypomethylated |
| cg13749927 | 0.26425 | 0.129524865 | -1.028674 | 0.0006   | hypomethylated |
| cg20300175 | 0.23681 | 0.116065405 | -1.028792 | 0.003316 | hypomethylated |
| cg27147785 | 0.33669 | 0.165000541 | -1.02895  | 0.001875 | hypomethylated |
| cg16997203 | 0.28754 | 0.140885405 | -1.02924  | 0.000523 | hypomethylated |
| cg03553715 | 0.3759  | 0.184074595 | -1.030058 | 0.003166 | hypomethylated |
| cg11348442 | 0.22528 | 0.110301081 | -1.030272 | 0.001751 | hypomethylated |
| cg16001422 | 0.42748 | 0.209296757 | -1.030307 | 8.03E-05 | hypomethylated |
| cg07153010 | 0.49273 | 0.241211351 | -1.0305   | 0.000166 | hypomethylated |
| cg19358397 | 0.36565 | 0.178925405 | -1.031105 | 0.000219 | hypomethylated |
| cg10373891 | 0.20061 | 0.098164324 | -1.031123 | 3.15E-05 | hypomethylated |
| cg07101841 | 0.36912 | 0.180575135 | -1.031491 | 0.002803 | hypomethylated |
| cg03178838 | 0.50917 | 0.249075676 | -1.031563 | 0.00504  | hypomethylated |
| cg03064100 | 0.5166  | 0.252623784 | -1.032057 | 0.000202 | hypomethylated |
| cg06858555 | 0.54875 | 0.268344865 | -1.032061 | 0.000182 | hypomethylated |
| cg05467676 | 0.4487  | 0.219322162 | -1.0327   | 0.002147 | hypomethylated |
| cg23694492 | 0.34226 | 0.16719027  | -1.033602 | 0.001496 | hypomethylated |
| cg19131313 | 0.21881 | 0.106871351 | -1.033804 | 0.002883 | hypomethylated |
| cg12750917 | 0.40929 | 0.199812973 | -1.034473 | 5.31E-05 | hypomethylated |
| cg23261919 | 0.52479 | 0.256178378 | -1.034592 | 0.002599 | hypomethylated |
| cg21525032 | 0.31512 | 0.153820541 | -1.034653 | 0.001651 | hypomethylated |

|            |         |             |           |          |                |
|------------|---------|-------------|-----------|----------|----------------|
| cg06114334 | 0.53061 | 0.258885946 | -1.035335 | 0.005085 | hypomethylated |
| cg24366211 | 0.48119 | 0.234748649 | -1.03549  | 0.006015 | hypomethylated |
| cg25952192 | 0.48882 | 0.238470811 | -1.035491 | 4.18E-06 | hypomethylated |
| cg03628719 | 0.22268 | 0.108589189 | -1.036092 | 0.000449 | hypomethylated |
| cg13585930 | 0.56812 | 0.277014054 | -1.036237 | 9.72E-05 | hypomethylated |
| cg17001034 | 0.30079 | 0.146596216 | -1.036909 | 0.001141 | hypomethylated |
| cg07635227 | 0.61777 | 0.301048108 | -1.037076 | 4.70E-05 | hypomethylated |
| cg15058210 | 0.5371  | 0.261590811 | -1.037879 | 1.66E-05 | hypomethylated |
| cg11756029 | 0.30651 | 0.149268108 | -1.038028 | 0.010126 | hypomethylated |
| cg13275603 | 0.44319 | 0.21582     | -1.038097 | 1.12E-05 | hypomethylated |
| cg15034300 | 0.40754 | 0.198370811 | -1.038742 | 0.003441 | hypomethylated |
| cg20979153 | 0.3254  | 0.158349189 | -1.039105 | 0.00071  | hypomethylated |
| cg26612165 | 0.25087 | 0.122058919 | -1.039362 | 0.002938 | hypomethylated |
| cg08446038 | 0.54429 | 0.264748108 | -1.039755 | 0.000449 | hypomethylated |
| cg08467103 | 0.60752 | 0.295453514 | -1.040001 | 0.000274 | hypomethylated |
| cg04202892 | 0.42426 | 0.206198919 | -1.040912 | 0.000805 | hypomethylated |
| cg02518245 | 0.33047 | 0.16052     | -1.041766 | 0.001875 | hypomethylated |
| cg05579652 | 0.32826 | 0.159283784 | -1.04324  | 0.008069 | hypomethylated |
| cg22009908 | 0.43448 | 0.210806486 | -1.043371 | 0.000224 | hypomethylated |
| cg21052608 | 0.31199 | 0.151341081 | -1.043696 | 0.002526 | hypomethylated |
| cg27477067 | 0.26301 | 0.127517297 | -1.044425 | 0.015809 | hypomethylated |
| cg27657983 | 0.39916 | 0.193048108 | -1.048007 | 0.000495 | hypomethylated |
| cg19391247 | 0.47257 | 0.228485946 | -1.048423 | 0.001354 | hypomethylated |
| cg05309989 | 0.32518 | 0.157175676 | -1.048861 | 0.007866 | hypomethylated |
| cg08060857 | 0.22876 | 0.11056     | -1.049005 | 0.000534 | hypomethylated |
| cg07382998 | 0.34973 | 0.169003784 | -1.049186 | 0.000408 | hypomethylated |
| cg05926314 | 0.85477 | 0.413050811 | -1.049217 | 3.59E-06 | hypomethylated |
| cg06590173 | 0.38031 | 0.183655676 | -1.050172 | 0.006339 | hypomethylated |
| cg21669326 | 0.48193 | 0.232484324 | -1.05169  | 3.40E-05 | hypomethylated |
| cg26110130 | 0.37526 | 0.181010811 | -1.051815 | 0.001839 | hypomethylated |
| cg08415592 | 0.5858  | 0.282554054 | -1.051881 | 0.000178 | hypomethylated |
| cg15771683 | 0.36319 | 0.175094054 | -1.052594 | 0.000187 | hypomethylated |
| cg22417733 | 0.39997 | 0.192665405 | -1.053794 | 7.29E-05 | hypomethylated |
| cg03297783 | 0.30819 | 0.148363243 | -1.054686 | 0.003773 | hypomethylated |
| cg06788267 | 0.5743  | 0.276346486 | -1.055326 | 6.95E-05 | hypomethylated |
| cg24921221 | 0.40314 | 0.193896757 | -1.055992 | 5.19E-05 | hypomethylated |
| cg22790839 | 0.55455 | 0.266600541 | -1.056638 | 2.13E-05 | hypomethylated |
| cg07474842 | 0.49693 | 0.238852432 | -1.056923 | 0.000772 | hypomethylated |
| cg10077672 | 0.19006 | 0.091341081 | -1.057119 | 0.000912 | hypomethylated |
| cg16688437 | 0.27572 | 0.132421081 | -1.058071 | 0.000148 | hypomethylated |
| cg04951797 | 0.43643 | 0.209582703 | -1.058231 | 0.000426 | hypomethylated |
| cg00494337 | 0.38937 | 0.186921622 | -1.058708 | 0.000772 | hypomethylated |
| cg09495643 | 0.49167 | 0.236       | -1.058903 | 0.004951 | hypomethylated |
| cg10377245 | 0.25524 | 0.122484324 | -1.059257 | 0.001367 | hypomethylated |
| cg13323489 | 0.54278 | 0.260404865 | -1.059611 | 0.000839 | hypomethylated |
| cg19241689 | 0.38051 | 0.182523784 | -1.05985  | 0.014838 | hypomethylated |
| cg08782022 | 0.64848 | 0.310971892 | -1.060278 | 0.000109 | hypomethylated |
| cg25225070 | 0.27521 | 0.131974054 | -1.060279 | 0.000232 | hypomethylated |
| cg05602356 | 0.24656 | 0.118137838 | -1.061468 | 0.00623  | hypomethylated |
| cg07733481 | 0.34826 | 0.166857297 | -1.06155  | 0.000399 | hypomethylated |
| cg27359566 | 0.59848 | 0.286654054 | -1.061992 | 0.000805 | hypomethylated |
| cg03354554 | 0.51917 | 0.248629189 | -1.062211 | 0.00039  | hypomethylated |
| cg21205978 | 0.39183 | 0.187625405 | -1.062373 | 0.001968 | hypomethylated |
| cg03280622 | 0.45913 | 0.219785946 | -1.062804 | 5.79E-05 | hypomethylated |
| cg12278705 | 0.35885 | 0.171667027 | -1.063768 | 0.000703 | hypomethylated |
| cg22579075 | 0.44121 | 0.211023784 | -1.06406  | 3.00E-05 | hypomethylated |
| cg20805133 | 0.50047 | 0.239342703 | -1.064206 | 0.00113  | hypomethylated |
| cg16561266 | 0.20884 | 0.099866486 | -1.064326 | 0.010555 | hypomethylated |

|            |         |             |           |          |                |
|------------|---------|-------------|-----------|----------|----------------|
| cg24500959 | 0.44298 | 0.211794054 | -1.064579 | 0.000313 | hypomethylated |
| cg23408558 | 0.65038 | 0.31076     | -1.065482 | 2.10E-06 | hypomethylated |
| cg03466587 | 0.53629 | 0.256090811 | -1.066358 | 0.000931 | hypomethylated |
| cg01254505 | 0.29105 | 0.138746486 | -1.068816 | 0.005223 | hypomethylated |
| cg23072383 | 0.2794  | 0.133161081 | -1.06916  | 0.006339 | hypomethylated |
| cg03966751 | 0.47014 | 0.223757297 | -1.071156 | 8.63E-05 | hypomethylated |
| cg13668314 | 0.34488 | 0.164133514 | -1.071225 | 0.001188 | hypomethylated |
| cg04926881 | 0.56139 | 0.267135676 | -1.071431 | 0.000123 | hypomethylated |
| cg25799109 | 0.52741 | 0.250950811 | -1.07152  | 0.000495 | hypomethylated |
| cg16788286 | 0.42456 | 0.201872432 | -1.072525 | 0.006564 | hypomethylated |
| cg03800922 | 0.33948 | 0.161378919 | -1.072874 | 0.002106 | hypomethylated |
| cg13905238 | 0.62717 | 0.298120541 | -1.072961 | 4.94E-05 | hypomethylated |
| cg21430685 | 0.45378 | 0.215575676 | -1.073799 | 0.002409 | hypomethylated |
| cg14019757 | 0.42499 | 0.201772973 | -1.074696 | 0.004445 | hypomethylated |
| cg27132471 | 0.48527 | 0.230311892 | -1.075199 | 0.000293 | hypomethylated |
| cg20893203 | 0.51102 | 0.242425946 | -1.075836 | 0.003637 | hypomethylated |
| cg15017278 | 0.55182 | 0.261755676 | -1.075977 | 0.000135 | hypomethylated |
| cg21180572 | 0.38286 | 0.181585405 | -1.076169 | 3.67E-05 | hypomethylated |
| cg23309670 | 0.55834 | 0.264794054 | -1.076273 | 0.000148 | hypomethylated |
| cg05315321 | 0.4016  | 0.190432432 | -1.07648  | 0.000374 | hypomethylated |
| cg12918213 | 0.36895 | 0.174937297 | -1.076587 | 0.00255  | hypomethylated |
| cg13985198 | 0.17322 | 0.082112973 | -1.076923 | 0.001107 | hypomethylated |
| cg04625338 | 0.55569 | 0.263214595 | -1.078041 | 3.23E-05 | hypomethylated |
| cg26389380 | 0.55574 | 0.262968108 | -1.079522 | 0.001074 | hypomethylated |
| cg24039081 | 0.48538 | 0.229515676 | -1.080522 | 0.000426 | hypomethylated |
| cg27306787 | 0.23895 | 0.112984865 | -1.080579 | 0.020743 | hypomethylated |
| cg25343618 | 0.43365 | 0.205028108 | -1.080709 | 0.000148 | hypomethylated |
| cg13765004 | 0.24842 | 0.117444324 | -1.080804 | 0.005363 | hypomethylated |
| cg00602295 | 0.6586  | 0.311347027 | -1.080879 | 1.15E-05 | hypomethylated |
| cg27107970 | 0.27464 | 0.129822162 | -1.081005 | 7.38E-05 | hypomethylated |
| cg07146104 | 0.38731 | 0.183052973 | -1.081228 | 0.001052 | hypomethylated |
| cg09657615 | 0.33079 | 0.15630973  | -1.081508 | 0.021548 | hypomethylated |
| cg02629106 | 0.28702 | 0.135601622 | -1.081777 | 0.0006   | hypomethylated |
| cg10949007 | 0.53376 | 0.252114595 | -1.082112 | 0.00151  | hypomethylated |
| cg03140412 | 0.60027 | 0.283525946 | -1.082131 | 0.002189 | hypomethylated |
| cg22202558 | 0.39477 | 0.186257297 | -1.083715 | 0.003986 | hypomethylated |
| cg26191447 | 0.37454 | 0.176646486 | -1.084255 | 0.002386 | hypomethylated |
| cg21499869 | 0.39888 | 0.187628108 | -1.088079 | 0.011274 | hypomethylated |
| cg07713361 | 0.23883 | 0.112325405 | -1.0883   | 0.00591  | hypomethylated |
| cg19416417 | 0.30435 | 0.143117297 | -1.088533 | 0.00044  | hypomethylated |
| cg16973527 | 0.34909 | 0.163911351 | -1.090683 | 0.000857 | hypomethylated |
| cg14351425 | 0.29719 | 0.139342162 | -1.092754 | 0.000123 | hypomethylated |
| cg26015888 | 0.21466 | 0.100565946 | -1.093912 | 0.000224 | hypomethylated |
| cg10773016 | 0.24861 | 0.116466486 | -1.093969 | 0.001734 | hypomethylated |
| cg03577157 | 0.59996 | 0.281004324 | -1.094274 | 9.72E-05 | hypomethylated |
| cg21703606 | 0.22034 | 0.103157297 | -1.094886 | 0.000667 | hypomethylated |
| cg05026393 | 0.19603 | 0.091732432 | -1.095571 | 0.004059 | hypomethylated |
| cg23777956 | 0.30994 | 0.145001081 | -1.095925 | 9.05E-05 | hypomethylated |
| cg02640104 | 0.2939  | 0.137383784 | -1.097114 | 0.001571 | hypomethylated |
| cg15787146 | 0.47761 | 0.223203243 | -1.097475 | 0.00024  | hypomethylated |
| cg22525688 | 0.49392 | 0.230823784 | -1.097486 | 0.000626 | hypomethylated |
| cg23962483 | 0.28377 | 0.132578378 | -1.097877 | 0.002253 | hypomethylated |
| cg03157040 | 0.18357 | 0.085743243 | -1.098235 | 0.00013  | hypomethylated |
| cg23595451 | 0.39383 | 0.183943784 | -1.098308 | 0.000129 | hypomethylated |
| cg08549335 | 0.63782 | 0.297854595 | -1.098541 | 5.93E-05 | hypomethylated |
| cg25054907 | 0.32959 | 0.153887568 | -1.098796 | 0.002624 | hypomethylated |
| cg27471192 | 0.43857 | 0.204632432 | -1.099772 | 4.47E-05 | hypomethylated |
| cg06942649 | 0.46913 | 0.218877838 | -1.099862 | 0.000182 | hypomethylated |

|            |         |             |           |          |                |
|------------|---------|-------------|-----------|----------|----------------|
| cg23344780 | 0.38732 | 0.180601081 | -1.100719 | 0.000152 | hypomethylated |
| cg22689909 | 0.5218  | 0.242757838 | -1.103979 | 0.002883 | hypomethylated |
| cg07805542 | 0.66536 | 0.309494595 | -1.104221 | 6.31E-05 | hypomethylated |
| cg07388969 | 0.66828 | 0.310680541 | -1.105021 | 9.27E-05 | hypomethylated |
| cg16474725 | 0.59046 | 0.274460541 | -1.105241 | 0.000445 | hypomethylated |
| cg09564133 | 0.28075 | 0.130454054 | -1.105744 | 0.001839 | hypomethylated |
| cg24003508 | 0.36024 | 0.167328108 | -1.106279 | 0.000517 | hypomethylated |
| cg14118226 | 0.31983 | 0.148472432 | -1.10711  | 0.00102  | hypomethylated |
| cg11847468 | 0.29379 | 0.136363243 | -1.10733  | 0.005859 | hypomethylated |
| cg05471495 | 0.3622  | 0.168079459 | -1.107643 | 0.002965 | hypomethylated |
| cg09126279 | 0.5293  | 0.245553514 | -1.108048 | 0.000485 | hypomethylated |
| cg19672546 | 0.43827 | 0.203296216 | -1.108237 | 0.000143 | hypomethylated |
| cg03707168 | 0.28407 | 0.131732973 | -1.10863  | 0.000495 | hypomethylated |
| cg03005261 | 0.2966  | 0.137515676 | -1.108923 | 0.000613 | hypomethylated |
| cg03518729 | 0.59274 | 0.274765405 | -1.109199 | 0.000107 | hypomethylated |
| cg22700686 | 0.45473 | 0.210750811 | -1.109472 | 0.000159 | hypomethylated |
| cg09550909 | 0.25589 | 0.118575135 | -1.109722 | 0.002478 | hypomethylated |
| cg01156249 | 0.58664 | 0.271438919 | -1.111848 | 0.000112 | hypomethylated |
| cg15244327 | 0.35034 | 0.162045405 | -1.112358 | 0.002624 | hypomethylated |
| cg06594281 | 0.25837 | 0.119491892 | -1.112526 | 0.00275  | hypomethylated |
| cg09803959 | 0.48972 | 0.226036757 | -1.1154   | 6.95E-05 | hypomethylated |
| cg25272655 | 0.26695 | 0.123124324 | -1.116454 | 0.008932 | hypomethylated |
| cg00834924 | 0.34873 | 0.160838378 | -1.116499 | 0.002126 | hypomethylated |
| cg25874782 | 0.51734 | 0.238508108 | -1.117074 | 0.001052 | hypomethylated |
| cg01303055 | 0.28637 | 0.132009189 | -1.117242 | 0.000893 | hypomethylated |
| cg17694130 | 0.31671 | 0.145927568 | -1.11791  | 0.000756 | hypomethylated |
| cg00664697 | 0.43964 | 0.202510811 | -1.118324 | 0.000733 | hypomethylated |
| cg27619475 | 0.2818  | 0.129777838 | -1.118628 | 0.002147 | hypomethylated |
| cg17988310 | 0.5843  | 0.26895027  | -1.11937  | 7.47E-05 | hypomethylated |
| cg02101203 | 0.32593 | 0.15        | -1.1196   | 0.001368 | hypomethylated |
| cg04029159 | 0.55024 | 0.253061622 | -1.120572 | 0.002106 | hypomethylated |
| cg26704293 | 0.51356 | 0.236183243 | -1.120626 | 0.000534 | hypomethylated |
| cg13485320 | 0.32236 | 0.148199459 | -1.121133 | 0.000857 | hypomethylated |
| cg18368411 | 0.41326 | 0.189913514 | -1.121707 | 0.001164 | hypomethylated |
| cg00539347 | 0.29931 | 0.137498919 | -1.12222  | 0.001153 | hypomethylated |
| cg14770102 | 0.38091 | 0.174819459 | -1.123584 | 0.000342 | hypomethylated |
| cg26140475 | 0.25562 | 0.117313514 | -1.123632 | 0.00012  | hypomethylated |
| cg25508319 | 0.53267 | 0.244424324 | -1.123854 | 0.000112 | hypomethylated |
| cg15782228 | 0.50826 | 0.233003243 | -1.125217 | 1.26E-05 | hypomethylated |
| cg18672030 | 0.39562 | 0.181350811 | -1.125332 | 0.001164 | hypomethylated |
| cg07756483 | 0.37235 | 0.17054973  | -1.126467 | 3.85E-05 | hypomethylated |
| cg12406559 | 0.57304 | 0.262363784 | -1.127067 | 0.00028  | hypomethylated |
| cg20873416 | 0.31912 | 0.146084865 | -1.127292 | 0.000667 | hypomethylated |
| cg14515996 | 0.40903 | 0.187196757 | -1.127651 | 0.0006   | hypomethylated |
| cg18082788 | 0.55718 | 0.254905405 | -1.128182 | 0.001212 | hypomethylated |
| cg17576316 | 0.30748 | 0.140637297 | -1.128513 | 0.002106 | hypomethylated |
| cg27179101 | 0.42471 | 0.194062162 | -1.129959 | 7.29E-05 | hypomethylated |
| cg23575688 | 0.48963 | 0.223667568 | -1.130336 | 0.000155 | hypomethylated |
| cg03761750 | 0.20557 | 0.093788108 | -1.132153 | 0.006855 | hypomethylated |
| cg05060704 | 0.2417  | 0.110247568 | -1.132471 | 0.00125  | hypomethylated |
| cg00544436 | 0.31372 | 0.142992973 | -1.133533 | 0.002253 | hypomethylated |
| cg05792169 | 0.54155 | 0.246825946 | -1.1336   | 0.000185 | hypomethylated |
| cg25349820 | 0.35325 | 0.16085027  | -1.134971 | 0.000839 | hypomethylated |
| cg14480249 | 0.37661 | 0.171448108 | -1.135299 | 0.002856 | hypomethylated |
| cg12209075 | 0.47984 | 0.218440541 | -1.135313 | 0.000138 | hypomethylated |
| cg03477080 | 0.35111 | 0.159825405 | -1.135426 | 0.004365 | hypomethylated |
| cg17881007 | 0.31949 | 0.145370811 | -1.136033 | 0.024309 | hypomethylated |
| cg05211768 | 0.3013  | 0.137089189 | -1.136086 | 0.001141 | hypomethylated |



|            |         |             |           |          |                |
|------------|---------|-------------|-----------|----------|----------------|
| cg13786863 | 0.50862 | 0.231394054 | -1.136236 | 0.002965 | hypomethylated |
| cg00557308 | 0.233   | 0.105956216 | -1.136862 | 0.000639 | hypomethylated |
| cg08824350 | 0.34316 | 0.155917838 | -1.138095 | 6.62E-05 | hypomethylated |
| cg17471425 | 0.48075 | 0.218352432 | -1.138628 | 0.000534 | hypomethylated |
| cg12060422 | 0.60193 | 0.273158919 | -1.139855 | 0.000435 | hypomethylated |
| cg12944183 | 0.27728 | 0.125796757 | -1.140249 | 0.003505 | hypomethylated |
| cg14665413 | 0.37164 | 0.16852973  | -1.140903 | 4.05E-05 | hypomethylated |
| cg14823429 | 0.43577 | 0.197405405 | -1.142405 | 0.00305  | hypomethylated |
| cg21815063 | 0.47504 | 0.215174595 | -1.142541 | 0.001176 | hypomethylated |
| cg25518868 | 0.44925 | 0.203421081 | -1.143049 | 0.000296 | hypomethylated |
| cg16476991 | 0.60596 | 0.274363243 | -1.143135 | 6.62E-05 | hypomethylated |
| cg12273284 | 0.58098 | 0.263045946 | -1.143174 | 0.000588 | hypomethylated |
| cg20389635 | 0.56194 | 0.254241622 | -1.144216 | 1.99E-05 | hypomethylated |
| cg15063366 | 0.23637 | 0.106941622 | -1.144223 | 0.000271 | hypomethylated |
| cg23731089 | 0.59861 | 0.270807568 | -1.144348 | 1.21E-05 | hypomethylated |
| cg19262282 | 0.39119 | 0.176718919 | -1.146413 | 0.000772 | hypomethylated |
| cg12126901 | 0.35836 | 0.161867568 | -1.146596 | 3.40E-05 | hypomethylated |
| cg11122255 | 0.4421  | 0.199472432 | -1.148183 | 0.000772 | hypomethylated |
| cg16865138 | 0.26181 | 0.118102703 | -1.148478 | 7.74E-05 | hypomethylated |
| cg05971148 | 0.28189 | 0.127030811 | -1.149954 | 0.004059 | hypomethylated |
| cg00506866 | 0.35073 | 0.157995676 | -1.150476 | 0.000506 | hypomethylated |
| cg26994377 | 0.517   | 0.232741081 | -1.151438 | 0.000626 | hypomethylated |
| cg13957558 | 0.37299 | 0.167906486 | -1.151479 | 0.00097  | hypomethylated |
| cg02297063 | 0.4956  | 0.222967568 | -1.152342 | 0.004776 | hypomethylated |
| cg05981038 | 0.4263  | 0.191771892 | -1.152478 | 0.0006   | hypomethylated |
| cg26683425 | 0.34345 | 0.154438378 | -1.153069 | 0.002296 | hypomethylated |
| cg26376241 | 0.53478 | 0.240381622 | -1.153619 | 6.62E-05 | hypomethylated |
| cg05624478 | 0.3456  | 0.155079459 | -1.156096 | 0.002409 | hypomethylated |
| cg02633924 | 0.37468 | 0.168062703 | -1.156659 | 0.003378 | hypomethylated |
| cg00950718 | 0.32993 | 0.147912973 | -1.157411 | 0.000123 | hypomethylated |
| cg09474442 | 0.43424 | 0.194662703 | -1.157516 | 6.08E-05 | hypomethylated |
| cg25433316 | 0.48496 | 0.217258919 | -1.15845  | 3.40E-05 | hypomethylated |
| cg15054077 | 0.46655 | 0.208957838 | -1.15882  | 0.003286 | hypomethylated |
| cg05673882 | 0.46871 | 0.209918919 | -1.158863 | 0.000262 | hypomethylated |
| cg16238993 | 0.48599 | 0.217651351 | -1.158908 | 0.003078 | hypomethylated |
| cg01959516 | 0.3751  | 0.16797027  | -1.159069 | 0.000129 | hypomethylated |
| cg07937427 | 0.45053 | 0.201596757 | -1.160151 | 0.002965 | hypomethylated |
| cg25690715 | 0.36658 | 0.163883784 | -1.161455 | 0.002386 | hypomethylated |
| cg19162768 | 0.4019  | 0.179671351 | -1.161476 | 0.000575 | hypomethylated |
| cg02791973 | 0.50999 | 0.22792973  | -1.16188  | 0.003347 | hypomethylated |
| cg27129922 | 0.36263 | 0.162013514 | -1.162384 | 0.003878 | hypomethylated |
| cg12897164 | 0.45507 | 0.203215676 | -1.163077 | 9.07E-06 | hypomethylated |
| cg06023661 | 0.40586 | 0.181152973 | -1.163774 | 0.000274 | hypomethylated |
| cg13877315 | 0.37454 | 0.167141622 | -1.164049 | 0.005557 | hypomethylated |
| cg00973309 | 0.42232 | 0.188416216 | -1.164413 | 0.000756 | hypomethylated |
| cg23885932 | 0.41232 | 0.183824865 | -1.165433 | 0.00275  | hypomethylated |
| cg13972124 | 0.4405  | 0.196188108 | -1.166904 | 0.000204 | hypomethylated |
| cg10890829 | 0.23843 | 0.106187027 | -1.166958 | 0.004287 | hypomethylated |
| cg23807071 | 0.55997 | 0.249386486 | -1.166966 | 0.002409 | hypomethylated |
| cg24158259 | 0.47914 | 0.213235135 | -1.168002 | 0.000772 | hypomethylated |
| cg20218460 | 0.27596 | 0.122758378 | -1.168638 | 0.001153 | hypomethylated |
| cg10024587 | 0.29863 | 0.132805946 | -1.169039 | 0.003136 | hypomethylated |
| cg16251079 | 0.25106 | 0.111545405 | -1.170401 | 0.000588 | hypomethylated |
| cg07482372 | 0.31278 | 0.138916757 | -1.170928 | 2.32E-05 | hypomethylated |
| cg16651780 | 0.25567 | 0.113525405 | -1.171268 | 0.001968 | hypomethylated |
| cg03921696 | 0.62557 | 0.277642703 | -1.171942 | 1.15E-05 | hypomethylated |
| cg21328779 | 0.34003 | 0.150827568 | -1.172762 | 7.84E-05 | hypomethylated |
| cg11318133 | 0.26786 | 0.118770811 | -1.173299 | 0.005606 | hypomethylated |

|            |         |             |           |          |                |
|------------|---------|-------------|-----------|----------|----------------|
| cg14295924 | 0.38958 | 0.172657838 | -1.174004 | 4.58E-05 | hypomethylated |
| cg26248066 | 0.45178 | 0.200163243 | -1.174443 | 0.000102 | hypomethylated |
| cg04663932 | 0.32579 | 0.144235676 | -1.175514 | 0.003604 | hypomethylated |
| cg01288184 | 0.59928 | 0.264925405 | -1.177644 | 0.00035  | hypomethylated |
| cg13759905 | 0.5079  | 0.224147568 | -1.180096 | 6.31E-05 | hypomethylated |
| cg16047279 | 0.5464  | 0.241101622 | -1.180316 | 0.000274 | hypomethylated |
| cg16210842 | 0.35294 | 0.155560541 | -1.181947 | 0.001118 | hypomethylated |
| cg18879590 | 0.29101 | 0.128181622 | -1.182879 | 0.001466 | hypomethylated |
| cg11116086 | 0.49457 | 0.21778973  | -1.183239 | 0.00097  | hypomethylated |
| cg23019886 | 0.53041 | 0.233382703 | -1.18441  | 0.000219 | hypomethylated |
| cg16783204 | 0.50098 | 0.220395135 | -1.184661 | 4.58E-05 | hypomethylated |
| cg01784327 | 0.26621 | 0.117102703 | -1.18479  | 0.00013  | hypomethylated |
| cg20665774 | 0.27569 | 0.121242703 | -1.185149 | 0.00024  | hypomethylated |
| cg19184897 | 0.36362 | 0.159884865 | -1.185398 | 4.93E-06 | hypomethylated |
| cg20272979 | 0.49927 | 0.219435676 | -1.186022 | 0.002147 | hypomethylated |
| cg17714703 | 0.22062 | 0.096902162 | -1.186963 | 0.000138 | hypomethylated |
| cg18361815 | 0.32885 | 0.144432973 | -1.18703  | 0.005911 | hypomethylated |
| cg19090437 | 0.55084 | 0.241770811 | -1.187993 | 7.93E-06 | hypomethylated |
| cg25969122 | 0.5799  | 0.254498378 | -1.188148 | 6.01E-05 | hypomethylated |
| cg07902749 | 0.24771 | 0.108531892 | -1.190533 | 0.000253 | hypomethylated |
| cg20765408 | 0.65071 | 0.285053514 | -1.190782 | 0.000159 | hypomethylated |
| cg04356381 | 0.35562 | 0.155759459 | -1.191017 | 0.000756 | hypomethylated |
| cg05675373 | 0.24531 | 0.107352973 | -1.192244 | 0.000639 | hypomethylated |
| cg25388800 | 0.55826 | 0.243835135 | -1.195031 | 0.000626 | hypomethylated |
| cg04456219 | 0.56351 | 0.246088649 | -1.195263 | 0.000245 | hypomethylated |
| cg20867963 | 0.48307 | 0.210923243 | -1.195514 | 0.012637 | hypomethylated |
| cg07220152 | 0.26955 | 0.117662703 | -1.195896 | 0.001987 | hypomethylated |
| cg01318557 | 0.50261 | 0.219342703 | -1.196253 | 0.000588 | hypomethylated |
| cg26221105 | 0.28044 | 0.122318378 | -1.197051 | 0.002231 | hypomethylated |
| cg24800655 | 0.33802 | 0.147428108 | -1.197097 | 0.005316 | hypomethylated |
| cg06487082 | 0.44155 | 0.19238     | -1.198618 | 0.000274 | hypomethylated |
| cg00672333 | 0.38795 | 0.169025405 | -1.198631 | 0.003914 | hypomethylated |
| cg16755500 | 0.30424 | 0.132403243 | -1.200271 | 0.003773 | hypomethylated |
| cg20928945 | 0.80003 | 0.348021081 | -1.200879 | 5.73E-06 | hypomethylated |
| cg24227481 | 0.47627 | 0.207158919 | -1.201042 | 0.001314 | hypomethylated |
| cg24287110 | 0.38058 | 0.165395676 | -1.202278 | 0.001839 | hypomethylated |
| cg08282819 | 0.35251 | 0.152913514 | -1.204948 | 0.000563 | hypomethylated |
| cg06400428 | 0.33981 | 0.147401081 | -1.204981 | 0.000902 | hypomethylated |
| cg27093918 | 0.40152 | 0.174057838 | -1.205905 | 0.000317 | hypomethylated |
| cg21208682 | 0.5583  | 0.241934054 | -1.206427 | 0.000116 | hypomethylated |
| cg07499182 | 0.43971 | 0.19050973  | -1.206688 | 0.002502 | hypomethylated |
| cg26577252 | 0.35236 | 0.152549189 | -1.207776 | 0.000185 | hypomethylated |
| cg14834675 | 0.40484 | 0.175212973 | -1.208242 | 0.002409 | hypomethylated |
| cg05343811 | 0.45582 | 0.197228649 | -1.208595 | 0.000111 | hypomethylated |
| cg22827210 | 0.45553 | 0.196997297 | -1.20937  | 0.000741 | hypomethylated |
| cg13775050 | 0.50556 | 0.21858     | -1.209721 | 0.001987 | hypomethylated |
| cg09940032 | 0.41042 | 0.177432432 | -1.209831 | 0.001188 | hypomethylated |
| cg06472476 | 0.24628 | 0.106456216 | -1.210039 | 0.001225 | hypomethylated |
| cg27454102 | 0.3313  | 0.143144865 | -1.210662 | 0.001452 | hypomethylated |
| cg02054792 | 0.2978  | 0.128638378 | -1.211023 | 0.000214 | hypomethylated |
| cg03033176 | 0.22294 | 0.096218378 | -1.212271 | 0.001074 | hypomethylated |
| cg16865965 | 0.47754 | 0.206069189 | -1.212493 | 2.32E-05 | hypomethylated |
| cg12280317 | 0.38999 | 0.168276757 | -1.212601 | 3.32E-05 | hypomethylated |
| cg11152384 | 0.49295 | 0.212375135 | -1.214826 | 0.00102  | hypomethylated |
| cg04263436 | 0.45003 | 0.193834054 | -1.215199 | 0.00504  | hypomethylated |
| cg08452061 | 0.3217  | 0.138366486 | -1.217221 | 0.000395 | hypomethylated |
| cg13860281 | 0.66831 | 0.287182703 | -1.218549 | 9.07E-06 | hypomethylated |
| cg03741862 | 0.24122 | 0.103505946 | -1.220636 | 0.000912 | hypomethylated |

|            |         |             |           |          |                |
|------------|---------|-------------|-----------|----------|----------------|
| cg27481708 | 0.29014 | 0.124483784 | -1.220791 | 0.002856 | hypomethylated |
| cg26270195 | 0.34413 | 0.147584324 | -1.221414 | 0.003021 | hypomethylated |
| cg18781966 | 0.30802 | 0.132085405 | -1.221553 | 4.53E-05 | hypomethylated |
| cg18442362 | 0.62642 | 0.268583243 | -1.221761 | 5.45E-05 | hypomethylated |
| cg01899130 | 0.29526 | 0.126579459 | -1.221943 | 0.002086 | hypomethylated |
| cg15564619 | 0.54886 | 0.235198919 | -1.222557 | 0.000106 | hypomethylated |
| cg15934804 | 0.32499 | 0.139227027 | -1.222956 | 0.000112 | hypomethylated |
| cg09288894 | 0.25188 | 0.107878378 | -1.223331 | 0.000331 | hypomethylated |
| cg13074866 | 0.28451 | 0.121751351 | -1.224542 | 3.95E-05 | hypomethylated |
| cg21213593 | 0.45105 | 0.192956757 | -1.22501  | 0.000132 | hypomethylated |
| cg19163395 | 0.65222 | 0.278825405 | -1.225997 | 3.12E-06 | hypomethylated |
| cg08679238 | 0.28114 | 0.120163243 | -1.226293 | 0.000342 | hypomethylated |
| cg18943383 | 0.22731 | 0.097116757 | -1.226869 | 0.00049  | hypomethylated |
| cg21151432 | 0.52272 | 0.223250811 | -1.227373 | 0.001212 | hypomethylated |
| cg26361533 | 0.42602 | 0.18191027  | -1.227694 | 8.42E-05 | hypomethylated |
| cg06679087 | 0.54797 | 0.233925946 | -1.228045 | 0.000166 | hypomethylated |
| cg20175702 | 0.54054 | 0.230740541 | -1.22813  | 0.000399 | hypomethylated |
| cg07126235 | 0.31467 | 0.134275676 | -1.228642 | 0.010211 | hypomethylated |
| cg16371229 | 0.4778  | 0.203861081 | -1.22882  | 0.000296 | hypomethylated |
| cg11626629 | 0.28004 | 0.119354054 | -1.230385 | 0.001603 | hypomethylated |
| cg04194674 | 0.25548 | 0.108881081 | -1.230457 | 0.003878 | hypomethylated |
| cg12666727 | 0.40104 | 0.170613514 | -1.233014 | 0.000931 | hypomethylated |
| cg00068038 | 0.2623  | 0.111522703 | -1.23388  | 0.001968 | hypomethylated |
| cg23521140 | 0.44166 | 0.187753514 | -1.234096 | 0.009315 | hypomethylated |
| cg03851835 | 0.5091  | 0.21628973  | -1.234984 | 8.42E-05 | hypomethylated |
| cg02147797 | 0.34207 | 0.145267568 | -1.235579 | 0.000182 | hypomethylated |
| cg14409810 | 0.39701 | 0.168506486 | -1.236371 | 0.000667 | hypomethylated |
| cg23072161 | 0.60983 | 0.258117297 | -1.24038  | 0.000191 | hypomethylated |
| cg08206881 | 0.25403 | 0.107432973 | -1.241562 | 0.001153 | hypomethylated |
| cg23811057 | 0.46548 | 0.196624324 | -1.243277 | 9.07E-06 | hypomethylated |
| cg21672292 | 0.4925  | 0.207745405 | -1.245307 | 0.000157 | hypomethylated |
| cg24638828 | 0.44461 | 0.187310811 | -1.247106 | 8.83E-06 | hypomethylated |
| cg15311822 | 0.29689 | 0.124878378 | -1.249405 | 0.000126 | hypomethylated |
| cg10981580 | 0.26755 | 0.112465405 | -1.250327 | 0.002856 | hypomethylated |
| cg15229275 | 0.35085 | 0.147466486 | -1.250467 | 0.00221  | hypomethylated |
| cg26998850 | 0.49584 | 0.208159459 | -1.252186 | 0.00098  | hypomethylated |
| cg21435684 | 0.54101 | 0.227104324 | -1.2523   | 0.000551 | hypomethylated |
| cg05209483 | 0.41798 | 0.175313514 | -1.253497 | 0.000155 | hypomethylated |
| cg14563196 | 0.19397 | 0.08127027  | -1.255034 | 0.000857 | hypomethylated |
| cg03762081 | 0.31897 | 0.133594054 | -1.255565 | 0.006015 | hypomethylated |
| cg03989617 | 0.40809 | 0.170805946 | -1.256529 | 2.78E-05 | hypomethylated |
| cg05068848 | 0.51683 | 0.216278378 | -1.2568   | 0.000178 | hypomethylated |
| cg23889684 | 0.28334 | 0.118456216 | -1.25818  | 0.0182   | hypomethylated |
| cg05259836 | 0.25206 | 0.105350811 | -1.258566 | 0.002386 | hypomethylated |
| cg08443563 | 0.57546 | 0.239945946 | -1.262006 | 1.92E-05 | hypomethylated |
| cg21324456 | 0.42587 | 0.177557838 | -1.262124 | 0.002883 | hypomethylated |
| cg07537821 | 0.39069 | 0.162859459 | -1.262397 | 6.46E-05 | hypomethylated |
| cg01799671 | 0.45343 | 0.189004324 | -1.262461 | 0.000464 | hypomethylated |
| cg01413054 | 0.5555  | 0.231197838 | -1.264659 | 0.000135 | hypomethylated |
| cg07118796 | 0.30952 | 0.128681622 | -1.266227 | 0.000485 | hypomethylated |
| cg09129067 | 0.59208 | 0.245887027 | -1.267797 | 0.000102 | hypomethylated |
| cg23683800 | 0.34976 | 0.145037297 | -1.269941 | 0.00035  | hypomethylated |
| cg04645070 | 0.34393 | 0.142518378 | -1.270967 | 4.82E-05 | hypomethylated |
| cg10156217 | 0.35028 | 0.144843784 | -1.274011 | 0.000725 | hypomethylated |
| cg24593688 | 0.34175 | 0.141283784 | -1.274345 | 0.001314 | hypomethylated |
| cg11409101 | 0.33243 | 0.137158919 | -1.277202 | 0.001667 | hypomethylated |
| cg21477985 | 0.45769 | 0.188797297 | -1.277533 | 0.00012  | hypomethylated |
| cg26168881 | 0.30411 | 0.125341081 | -1.278734 | 0.001118 | hypomethylated |

|            |         |             |           |          |                |
|------------|---------|-------------|-----------|----------|----------------|
| cg20740711 | 0.34645 | 0.142674595 | -1.279919 | 5.72E-05 | hypomethylated |
| cg05614013 | 0.28782 | 0.118485946 | -1.280451 | 7.38E-05 | hypomethylated |
| cg26502852 | 0.38648 | 0.158958378 | -1.281745 | 0.004691 | hypomethylated |
| cg04772025 | 0.40348 | 0.165761622 | -1.283387 | 0.000772 | hypomethylated |
| cg09015280 | 0.47687 | 0.195879459 | -1.28363  | 0.000271 | hypomethylated |
| cg13324103 | 0.41333 | 0.169743243 | -1.28394  | 0.001164 | hypomethylated |
| cg19516647 | 0.16043 | 0.065834595 | -1.285026 | 0.000893 | hypomethylated |
| cg15275625 | 0.38085 | 0.156133514 | -1.286443 | 0.000143 | hypomethylated |
| cg07688604 | 0.34806 | 0.142508649 | -1.288287 | 0.003773 | hypomethylated |
| cg14290616 | 0.16225 | 0.066417838 | -1.288576 | 0.002599 | hypomethylated |
| cg06530983 | 0.23698 | 0.097002703 | -1.288668 | 6.54E-05 | hypomethylated |
| cg12534147 | 0.50086 | 0.204602162 | -1.291586 | 0.002046 | hypomethylated |
| cg12026563 | 0.31963 | 0.130312973 | -1.294422 | 0.00421  | hypomethylated |
| cg15128801 | 0.25728 | 0.104845946 | -1.295068 | 0.010042 | hypomethylated |
| cg21571658 | 0.46162 | 0.188066486 | -1.295463 | 0.001481 | hypomethylated |
| cg06061086 | 0.5255  | 0.213625946 | -1.298604 | 0.001949 | hypomethylated |
| cg04794141 | 0.45332 | 0.184143784 | -1.299697 | 8.63E-05 | hypomethylated |
| cg19310148 | 0.23369 | 0.094924324 | -1.299746 | 0.001667 | hypomethylated |
| cg07576409 | 0.23802 | 0.09660973  | -1.300842 | 0.004733 | hypomethylated |
| cg27181375 | 0.38257 | 0.155235135 | -1.301269 | 0.000159 | hypomethylated |
| cg13278795 | 0.29142 | 0.118139459 | -1.302609 | 0.000646 | hypomethylated |
| cg13326508 | 0.43081 | 0.174619459 | -1.302837 | 0.000506 | hypomethylated |
| cg14516948 | 0.27447 | 0.111081081 | -1.305035 | 0.002066 | hypomethylated |
| cg03317505 | 0.287   | 0.116091892 | -1.305784 | 0.00101  | hypomethylated |
| cg16518772 | 0.3353  | 0.135549189 | -1.306636 | 0.000331 | hypomethylated |
| cg25416067 | 0.38    | 0.153474054 | -1.308005 | 0.001074 | hypomethylated |
| cg22274117 | 0.53154 | 0.214634054 | -1.308299 | 0.000293 | hypomethylated |
| cg20645040 | 0.36996 | 0.149235135 | -1.309782 | 0.000209 | hypomethylated |
| cg00446414 | 0.34519 | 0.13916973  | -1.310545 | 0.004906 | hypomethylated |
| cg15677957 | 0.42355 | 0.170691892 | -1.311138 | 0.000822 | hypomethylated |
| cg26051755 | 0.27293 | 0.109911351 | -1.312191 | 0.000134 | hypomethylated |
| cg10893986 | 0.37466 | 0.150584865 | -1.315005 | 0.002502 | hypomethylated |
| cg01827726 | 0.27068 | 0.108787568 | -1.315075 | 0.001987 | hypomethylated |
| cg08692423 | 0.26111 | 0.10493027  | -1.315227 | 0.003637 | hypomethylated |
| cg00082497 | 0.21819 | 0.087597838 | -1.316618 | 0.001541 | hypomethylated |
| cg14753321 | 0.35049 | 0.140632432 | -1.317444 | 0.003225 | hypomethylated |
| cg04403415 | 0.2848  | 0.114256216 | -1.317676 | 9.05E-05 | hypomethylated |
| cg22047295 | 0.55582 | 0.222937838 | -1.317976 | 0.001141 | hypomethylated |
| cg14204735 | 0.38239 | 0.15336     | -1.318123 | 0.001262 | hypomethylated |
| cg05336982 | 0.39373 | 0.157843243 | -1.318714 | 0.001409 | hypomethylated |
| cg10087036 | 0.49803 | 0.199565405 | -1.319371 | 0.000789 | hypomethylated |
| cg06747543 | 0.29279 | 0.11721027  | -1.320767 | 0.002938 | hypomethylated |
| cg14972576 | 0.53137 | 0.212382162 | -1.323054 | 4.58E-05 | hypomethylated |
| cg16066354 | 0.41753 | 0.166775135 | -1.323976 | 0.002599 | hypomethylated |
| cg26928858 | 0.33043 | 0.131767027 | -1.326355 | 0.017643 | hypomethylated |
| cg19869746 | 0.32156 | 0.127988649 | -1.329072 | 0.000303 | hypomethylated |
| cg20448053 | 0.2349  | 0.093482703 | -1.329275 | 0.004133 | hypomethylated |
| cg23274561 | 0.30257 | 0.120376216 | -1.329719 | 0.000417 | hypomethylated |
| cg19595750 | 0.348   | 0.138376216 | -1.330491 | 0.005962 | hypomethylated |
| cg18572413 | 0.28182 | 0.111921622 | -1.332285 | 0.000358 | hypomethylated |
| cg14248553 | 0.28235 | 0.112089189 | -1.332837 | 0.001096 | hypomethylated |
| cg13656752 | 0.4773  | 0.189457838 | -1.33302  | 0.001031 | hypomethylated |
| cg06433467 | 0.41578 | 0.165014054 | -1.333231 | 0.000653 | hypomethylated |
| cg12521167 | 0.28129 | 0.111585946 | -1.333903 | 0.000626 | hypomethylated |
| cg09956615 | 0.33914 | 0.134347568 | -1.335911 | 6.78E-05 | hypomethylated |
| cg16389901 | 0.55342 | 0.219157838 | -1.336405 | 0.000495 | hypomethylated |
| cg24713529 | 0.18425 | 0.072905946 | -1.337556 | 0.002231 | hypomethylated |
| cg07716663 | 0.28733 | 0.113648649 | -1.338128 | 0.004209 | hypomethylated |

|            |         |             |           |          |                |
|------------|---------|-------------|-----------|----------|----------------|
| cg22473727 | 0.33565 | 0.132743243 | -1.338319 | 0.000839 | hypomethylated |
| cg21956614 | 0.32582 | 0.128467568 | -1.342671 | 0.000111 | hypomethylated |
| cg25181684 | 0.37153 | 0.146017838 | -1.347334 | 0.000696 | hypomethylated |
| cg23175074 | 0.36734 | 0.144322703 | -1.347818 | 0.000674 | hypomethylated |
| cg07348922 | 0.31619 | 0.124197838 | -1.348152 | 0.003473 | hypomethylated |
| cg15840891 | 0.31722 | 0.12433027  | -1.351306 | 0.000688 | hypomethylated |
| cg02585906 | 0.49177 | 0.192584865 | -1.352489 | 0.001987 | hypomethylated |
| cg06552563 | 0.33451 | 0.130765405 | -1.355068 | 0.00513  | hypomethylated |
| cg06210447 | 0.30208 | 0.118041622 | -1.355635 | 0.001838 | hypomethylated |
| cg07030727 | 0.4587  | 0.179125946 | -1.356577 | 1.66E-05 | hypomethylated |
| cg05664072 | 0.23505 | 0.091556757 | -1.360229 | 0.001556 | hypomethylated |
| cg02131967 | 0.31445 | 0.122377297 | -1.361495 | 0.000639 | hypomethylated |
| cg05337743 | 0.24782 | 0.096442703 | -1.361549 | 0.002167 | hypomethylated |
| cg15978561 | 0.54157 | 0.210692432 | -1.362009 | 2.57E-05 | hypomethylated |
| cg12435551 | 0.41025 | 0.159498919 | -1.362957 | 0.001466 | hypomethylated |
| cg06976598 | 0.55031 | 0.21390973  | -1.363242 | 0.000135 | hypomethylated |
| cg00506168 | 0.33656 | 0.130801622 | -1.363483 | 0.001176 | hypomethylated |
| cg23654821 | 0.25792 | 0.100125405 | -1.365116 | 0.000153 | hypomethylated |
| cg23322242 | 0.26314 | 0.102031351 | -1.366818 | 0.000626 | hypomethylated |
| cg20834178 | 0.49692 | 0.19226973  | -1.369882 | 0.00024  | hypomethylated |
| cg01616225 | 0.42802 | 0.165581081 | -1.37014  | 5.19E-05 | hypomethylated |
| cg21853021 | 0.40574 | 0.156842162 | -1.371242 | 0.002649 | hypomethylated |
| cg23305567 | 0.28882 | 0.111499459 | -1.373134 | 0.003049 | hypomethylated |
| cg19084031 | 0.3325  | 0.128343784 | -1.373341 | 0.00291  | hypomethylated |
| cg04098194 | 0.21495 | 0.082851351 | -1.375404 | 0.000153 | hypomethylated |
| cg26388816 | 0.25445 | 0.097961622 | -1.377094 | 0.000857 | hypomethylated |
| cg11006453 | 0.62106 | 0.239079459 | -1.377242 | 6.93E-06 | hypomethylated |
| cg21526750 | 0.49173 | 0.189207027 | -1.377901 | 0.00035  | hypomethylated |
| cg19671553 | 0.42071 | 0.161858378 | -1.378094 | 0.00094  | hypomethylated |
| cg25095994 | 0.3977  | 0.152988108 | -1.378261 | 0.002363 | hypomethylated |
| cg20799268 | 0.33443 | 0.128557838 | -1.379287 | 0.000588 | hypomethylated |
| cg22234930 | 0.43433 | 0.166805405 | -1.380626 | 0.00049  | hypomethylated |
| cg09417692 | 0.45066 | 0.172918919 | -1.381944 | 0.00032  | hypomethylated |
| cg14150907 | 0.31824 | 0.122083243 | -1.38225  | 0.000772 | hypomethylated |
| cg01224366 | 0.34403 | 0.131812432 | -1.384048 | 0.000354 | hypomethylated |
| cg01787285 | 0.27735 | 0.106237297 | -1.384417 | 0.000979 | hypomethylated |
| cg16957313 | 0.29331 | 0.112312973 | -1.384902 | 0.000551 | hypomethylated |
| cg23037321 | 0.33764 | 0.129280541 | -1.384981 | 0.000931 | hypomethylated |
| cg20968743 | 0.43682 | 0.167228649 | -1.385217 | 0.00017  | hypomethylated |
| cg23894287 | 0.30671 | 0.117320541 | -1.38642  | 0.000839 | hypomethylated |
| cg18020065 | 0.48264 | 0.184547027 | -1.386959 | 0.000674 | hypomethylated |
| cg24631526 | 0.47716 | 0.182208108 | -1.388886 | 0.000528 | hypomethylated |
| cg20557104 | 0.35044 | 0.133767027 | -1.389445 | 0.000313 | hypomethylated |
| cg09621958 | 0.30602 | 0.116368108 | -1.39493  | 2.57E-05 | hypomethylated |
| cg04466840 | 0.51803 | 0.196767568 | -1.396543 | 0.000866 | hypomethylated |
| cg19516340 | 0.48623 | 0.184518919 | -1.39787  | 0.000501 | hypomethylated |
| cg15862165 | 0.3831  | 0.145117838 | -1.400496 | 0.000166 | hypomethylated |
| cg16367976 | 0.15281 | 0.057882703 | -1.400535 | 9.05E-05 | hypomethylated |
| cg19950069 | 0.28085 | 0.106287568 | -1.401827 | 0.001912 | hypomethylated |
| cg04387396 | 0.30417 | 0.115079459 | -1.402248 | 0.000346 | hypomethylated |
| cg06197966 | 0.38038 | 0.14356     | -1.405788 | 0.001751 | hypomethylated |
| cg25338563 | 0.3503  | 0.132062162 | -1.407374 | 3.81E-05 | hypomethylated |
| cg02954562 | 0.48306 | 0.181703243 | -1.410618 | 4.26E-05 | hypomethylated |
| cg08412913 | 0.35543 | 0.133654595 | -1.411056 | 0.00017  | hypomethylated |
| cg18178715 | 0.47878 | 0.179994054 | -1.411414 | 0.000756 | hypomethylated |
| cg19250790 | 0.14857 | 0.055743784 | -1.41426  | 0.001301 | hypomethylated |
| cg20942867 | 0.45634 | 0.171180541 | -1.41459  | 0.000145 | hypomethylated |
| cg00971050 | 0.35385 | 0.132482703 | -1.417334 | 0.001821 | hypomethylated |

|            |         |             |           |          |                |
|------------|---------|-------------|-----------|----------|----------------|
| cg01484686 | 0.2751  | 0.102776757 | -1.420442 | 0.000358 | hypomethylated |
| cg07339236 | 0.39706 | 0.148200541 | -1.421806 | 1.54E-05 | hypomethylated |
| cg11228682 | 0.49989 | 0.185818378 | -1.427717 | 0.009959 | hypomethylated |
| cg09825309 | 0.36508 | 0.135582162 | -1.429045 | 1.35E-05 | hypomethylated |
| cg04935109 | 0.35424 | 0.131192432 | -1.433043 | 0.000805 | hypomethylated |
| cg12221087 | 0.29581 | 0.109506486 | -1.433654 | 0.00504  | hypomethylated |
| cg24789596 | 0.26244 | 0.097112973 | -1.434252 | 0.002363 | hypomethylated |
| cg23047271 | 0.34642 | 0.127812973 | -1.438488 | 0.000327 | hypomethylated |
| cg26520930 | 0.27304 | 0.100014595 | -1.448902 | 0.000756 | hypomethylated |
| cg03663556 | 0.50213 | 0.183554054 | -1.451856 | 2.71E-05 | hypomethylated |
| cg17683908 | 0.22311 | 0.081463243 | -1.453534 | 0.000148 | hypomethylated |
| cg23558337 | 0.22697 | 0.082815676 | -1.454526 | 0.000163 | hypomethylated |
| cg14692854 | 0.19751 | 0.072045405 | -1.454947 | 0.000166 | hypomethylated |
| cg18886444 | 0.21563 | 0.078584324 | -1.456244 | 0.000581 | hypomethylated |
| cg08995609 | 0.31033 | 0.112615676 | -1.462396 | 0.000681 | hypomethylated |
| cg01573472 | 0.2112  | 0.076628649 | -1.462654 | 0.00234  | hypomethylated |
| cg15701237 | 0.24601 | 0.089224865 | -1.463199 | 0.005858 | hypomethylated |
| cg02983090 | 0.40005 | 0.145087027 | -1.463262 | 0.000725 | hypomethylated |
| cg13070763 | 0.37301 | 0.135205946 | -1.464056 | 0.000594 | hypomethylated |
| cg09889848 | 0.44749 | 0.16213027  | -1.464702 | 0.000374 | hypomethylated |
| cg08076266 | 0.3042  | 0.110152973 | -1.465512 | 0.000902 | hypomethylated |
| cg23844623 | 0.15069 | 0.054525405 | -1.466583 | 0.000522 | hypomethylated |
| cg23708763 | 0.33762 | 0.121708649 | -1.471969 | 0.000789 | hypomethylated |
| cg26650359 | 0.38383 | 0.138315676 | -1.472503 | 3.40E-05 | hypomethylated |
| cg13157980 | 0.3938  | 0.141658919 | -1.475042 | 3.15E-05 | hypomethylated |
| cg21708130 | 0.54069 | 0.194205946 | -1.477214 | 3.85E-05 | hypomethylated |
| cg17130457 | 0.47143 | 0.169265405 | -1.477756 | 0.000126 | hypomethylated |
| cg06665109 | 0.34282 | 0.123037297 | -1.478356 | 0.011744 | hypomethylated |
| cg09055236 | 0.39654 | 0.141980541 | -1.481773 | 0.000408 | hypomethylated |
| cg08226590 | 0.31589 | 0.113071892 | -1.482182 | 0.001212 | hypomethylated |
| cg06530961 | 0.33956 | 0.12149027  | -1.482826 | 0.000214 | hypomethylated |
| cg08989979 | 0.15203 | 0.054387027 | -1.483022 | 0.000435 | hypomethylated |
| cg03367387 | 0.47085 | 0.168265405 | -1.484529 | 0.00054  | hypomethylated |
| cg26084949 | 0.34228 | 0.122308649 | -1.484651 | 8.63E-05 | hypomethylated |
| cg10536999 | 0.39709 | 0.141356216 | -1.490131 | 0.003878 | hypomethylated |
| cg12457415 | 0.34735 | 0.123588649 | -1.490844 | 0.000135 | hypomethylated |
| cg20517697 | 0.27577 | 0.097716757 | -1.496788 | 0.001212 | hypomethylated |
| cg12864389 | 0.45399 | 0.160695676 | -1.498329 | 7.03E-05 | hypomethylated |
| cg23145794 | 0.34057 | 0.120539459 | -1.498446 | 0.000931 | hypomethylated |
| cg25250968 | 0.44142 | 0.155999459 | -1.500611 | 8.84E-05 | hypomethylated |
| cg25694349 | 0.31111 | 0.109675135 | -1.504188 | 0.006973 | hypomethylated |
| cg04650676 | 0.34774 | 0.122527568 | -1.504903 | 0.002776 | hypomethylated |
| cg23804620 | 0.29326 | 0.103175135 | -1.507085 | 0.00101  | hypomethylated |
| cg26365553 | 0.36779 | 0.129297297 | -1.50819  | 0.000256 | hypomethylated |
| cg07190763 | 0.3382  | 0.11884     | -1.508856 | 0.00275  | hypomethylated |
| cg08640824 | 0.33359 | 0.117131351 | -1.509949 | 0.00097  | hypomethylated |
| cg06616710 | 0.30878 | 0.108357838 | -1.510776 | 0.000271 | hypomethylated |
| cg26824216 | 0.19811 | 0.069415135 | -1.51298  | 0.001911 | hypomethylated |
| cg09418984 | 0.35724 | 0.124947027 | -1.515577 | 0.010126 | hypomethylated |
| cg18166947 | 0.18193 | 0.063364324 | -1.521641 | 0.000517 | hypomethylated |
| cg24965479 | 0.44636 | 0.155341622 | -1.522763 | 0.000563 | hypomethylated |
| cg26353296 | 0.2578  | 0.089624324 | -1.52429  | 0.001949 | hypomethylated |
| cg13600477 | 0.27965 | 0.097126486 | -1.525686 | 0.002937 | hypomethylated |
| cg21912556 | 0.52164 | 0.180945946 | -1.527496 | 0.000123 | hypomethylated |
| cg02853152 | 0.45817 | 0.157748108 | -1.53826  | 0.000214 | hypomethylated |
| cg24851858 | 0.31358 | 0.107637838 | -1.542648 | 0.00094  | hypomethylated |
| cg13393476 | 0.2836  | 0.096863784 | -1.549828 | 0.000421 | hypomethylated |
| cg00474080 | 0.2643  | 0.090267027 | -1.549905 | 0.00305  | hypomethylated |

|            |         |             |           |          |                |
|------------|---------|-------------|-----------|----------|----------------|
| cg01802545 | 0.22551 | 0.076854595 | -1.552988 | 6.15E-05 | hypomethylated |
| cg09410512 | 0.45426 | 0.154003243 | -1.560558 | 6.01E-05 | hypomethylated |
| cg09920557 | 0.24831 | 0.084156216 | -1.561001 | 0.002937 | hypomethylated |
| cg15896084 | 0.32731 | 0.110770811 | -1.56308  | 0.003107 | hypomethylated |
| cg15754548 | 0.23954 | 0.080981622 | -1.5646   | 0.006678 | hypomethylated |
| cg08055087 | 0.36128 | 0.121446486 | -1.572797 | 0.000517 | hypomethylated |
| cg17766007 | 0.18288 | 0.061032432 | -1.583249 | 0.000674 | hypomethylated |
| cg02413040 | 0.25288 | 0.084307027 | -1.584728 | 0.0017   | hypomethylated |
| cg05876246 | 0.30198 | 0.100658378 | -1.584986 | 0.000581 | hypomethylated |
| cg00091044 | 0.19754 | 0.065611892 | -1.590116 | 0.000511 | hypomethylated |
| cg18002814 | 0.22602 | 0.075058919 | -1.590355 | 0.004286 | hypomethylated |
| cg05143530 | 0.5036  | 0.166589189 | -1.595984 | 0.000182 | hypomethylated |
| cg19513321 | 0.24818 | 0.081388649 | -1.608487 | 0.000219 | hypomethylated |
| cg09923107 | 0.2013  | 0.065951351 | -1.609873 | 0.000788 | hypomethylated |
| cg12641569 | 0.20623 | 0.067477838 | -1.611769 | 0.016058 | hypomethylated |
| cg25131452 | 0.24271 | 0.079289189 | -1.614037 | 0.004134 | hypomethylated |
| cg04786142 | 0.54892 | 0.178791351 | -1.618319 | 6.46E-05 | hypomethylated |
| cg01973676 | 0.53295 | 0.173366486 | -1.620175 | 0.00014  | hypomethylated |
| cg15281283 | 0.3382  | 0.109937297 | -1.621196 | 0.000588 | hypomethylated |
| cg21333861 | 0.34945 | 0.113287568 | -1.625097 | 0.001451 | hypomethylated |
| cg10633838 | 0.29269 | 0.09481027  | -1.626258 | 0.001314 | hypomethylated |
| cg00498024 | 0.30462 | 0.098300541 | -1.631739 | 0.004134 | hypomethylated |
| cg14043253 | 0.36036 | 0.115964865 | -1.635751 | 0.00151  | hypomethylated |
| cg12405258 | 0.30979 | 0.099512432 | -1.638342 | 0.006229 | hypomethylated |
| cg05656374 | 0.28004 | 0.089910811 | -1.639066 | 0.000262 | hypomethylated |
| cg20289346 | 0.21807 | 0.069532973 | -1.649022 | 0.000949 | hypomethylated |
| cg21961202 | 0.2033  | 0.063971351 | -1.668112 | 0.000224 | hypomethylated |
| cg18422268 | 0.26394 | 0.08236     | -1.680194 | 0.000346 | hypomethylated |
| cg01889574 | 0.34526 | 0.106043784 | -1.703023 | 0.002883 | hypomethylated |
| cg02231066 | 0.36088 | 0.109879459 | -1.715597 | 0.005411 | hypomethylated |
| cg18437710 | 0.32802 | 0.0996      | -1.719566 | 0.00028  | hypomethylated |
| cg16730737 | 0.20579 | 0.062085946 | -1.728834 | 0.00093  | hypomethylated |
| cg01308827 | 0.3547  | 0.106971892 | -1.729368 | 0.001635 | hypomethylated |
| cg09887589 | 0.23849 | 0.071081622 | -1.74638  | 0.000234 | hypomethylated |
| cg04987499 | 0.26885 | 0.079844865 | -1.75153  | 0.000178 | hypomethylated |
| cg22291084 | 0.26972 | 0.078570811 | -1.779397 | 0.0002   | hypomethylated |
| cg06936290 | 0.51503 | 0.149116216 | -1.788219 | 2.64E-05 | hypomethylated |
| cg05101437 | 0.3326  | 0.096129189 | -1.790742 | 0.000545 | hypomethylated |
| cg13365340 | 0.32069 | 0.09170973  | -1.806033 | 0.00095  | hypomethylated |
| cg18516619 | 0.29976 | 0.084620541 | -1.824728 | 0.00095  | hypomethylated |
| cg04560810 | 0.27667 | 0.077191351 | -1.841655 | 0.002296 | hypomethylated |
| cg08105396 | 0.29109 | 0.079989189 | -1.863588 | 0.009083 | hypomethylated |
| cg04111789 | 0.4779  | 0.127848649 | -1.902272 | 0.001409 | hypomethylated |
| cg24500441 | 0.21687 | 0.057278378 | -1.920768 | 0.000129 | hypomethylated |
| cg11997708 | 0.27353 | 0.072076757 | -1.924093 | 0.012034 | hypomethylated |
| cg25360181 | 0.24968 | 0.065677838 | -1.926602 | 0.000142 | hypomethylated |
| cg02386420 | 0.24931 | 0.06532973  | -1.932129 | 0.000884 | hypomethylated |
| cg11385003 | 0.2498  | 0.065010811 | -1.942022 | 0.000346 | hypomethylated |
| cg22627826 | 0.19731 | 0.051007027 | -1.951696 | 0.000168 | hypomethylated |
| cg10959711 | 0.24777 | 0.064001622 | -1.952821 | 4.05E-05 | hypomethylated |
| cg06075789 | 0.29797 | 0.07566     | -1.977564 | 6.01E-05 | hypomethylated |
| cg03130910 | 0.34757 | 0.08823027  | -1.977958 | 0.000224 | hypomethylated |
| cg02229757 | 0.29028 | 0.073394595 | -1.983699 | 0.00049  | hypomethylated |
| cg19664267 | 0.35898 | 0.090607027 | -1.986209 | 0.001785 | hypomethylated |
| cg27373972 | 0.26243 | 0.066191351 | -1.987218 | 0.000893 | hypomethylated |
| cg13118906 | 0.23707 | 0.058794595 | -2.011558 | 0.00495  | hypomethylated |
| cg15543281 | 0.31775 | 0.078367568 | -2.019564 | 0.002209 | hypomethylated |
| cg04659689 | 0.41628 | 0.101029189 | -2.042782 | 0.00078  | hypomethylated |

|            |         |             |           |          |                |
|------------|---------|-------------|-----------|----------|----------------|
| cg27098900 | 0.34451 | 0.082672973 | -2.059058 | 0.000653 | hypomethylated |
| cg11772919 | 0.33696 | 0.077853514 | -2.113743 | 0.000979 | hypomethylated |
| cg01383799 | 0.32893 | 0.074508108 | -2.142311 | 0.0003   | hypomethylated |
| cg07675334 | 0.27025 | 0.060473514 | -2.159919 | 0.015316 | hypomethylated |
| cg00813746 | 0.24997 | 0.053176757 | -2.232887 | 0.003049 | hypomethylated |
| cg04588455 | 0.27194 | 0.055867568 | -2.283205 | 0.000357 | hypomethylated |
