# Supplementary material for: CpG Island Methylator Phenotype Modulates the Immune Response of the Tumor Microenvironment and Influences the Prognosis of Pancreatic Cancer Patients
Source: Hindawi journal article supplement (doi:10.1155/2021/2715694), 2021-11-28
Supplement: f1 [file 2715694.f1.zip]

**The 72 most overall survival-related CpGs identified by multivariate Cox analysis**

| CpG        | Gene         | HR        | pvalue      |
|------------|--------------|-----------|-------------|
| cg14356919 | COL18A1      | 1.98E-45  | 1.02E-06    |
| cg05398036 | MIR548F1     | 2.92E+179 | 2.15E-07    |
| cg06788267 | SLC44A3      | 9.82E-85  | 3.08E-06    |
| cg04926881 | LOC100506497 | 4.54E-303 | 1.32E-07    |
| cg27471192 | MPEG1        | Infinite  | 1.94E-07    |
| cg13454226 | KLF6         | 1.10E+184 | 4.36E-07    |
| cg10536999 | NFE2L3       | 2.99E-28  | 0.000300232 |
| cg07541559 | ABTB2        | Infinite  | 2.08E-07    |
| cg25799109 | ARHGEF3      | 1.02E-42  | 4.10E-06    |
| cg07317062 | HOXA4        | 7.17E+128 | 1.04E-06    |
| cg16945312 | FOXF2        | 2.26E+15  | 1.41E-08    |
| cg22392666 | FXYP7        | 9.57E+29  | 2.94E-06    |
| cg10659886 | ZSCAN18      | 8.85E+43  | 0.001576161 |
| cg13371839 | ZNF98        | 6.74E+52  | 9.66E-05    |
| cg07160746 | KCNS1        | 4.17E-105 | 2.43E-07    |
| cg08305436 | ZNF492       | 2.20E+276 | 1.31E-07    |
| cg19125370 | TFAP2A       | 2.36E-223 | 2.48E-07    |
| cg22605415 | FBXO8        | 2.10E-13  | 7.62E-05    |
| cg11073773 | RNU6-16P     | 1.15E-92  | 2.62E-07    |
| cg13944175 | HAS1         | 8.03E-23  | 0.002209581 |
| cg05678749 | GABRG3       | 1.02E+30  | 0.000383257 |
| cg11308643 | GRIA4        | 1.30E+111 | 3.64E-07    |
| cg22131234 | VSTM2A       | 8.17E-102 | 9.80E-07    |
| cg20266316 | NPTX2        | 4.19E-165 | 1.52E-07    |
| cg21135135 | WBSCR17      | 6.53E+168 | 3.40E-07    |
| cg24127719 | SIM2         | 4.21E-30  | 4.31E-08    |
| cg10175795 | TCERG1L      | Infinite  | 2.99E-07    |
| cg15060599 | FGD5P1       | 1.64E-79  | 1.86E-06    |
| cg17098147 | SPAG6        | 2.91E+39  | 0.00033391  |
| cg13891978 | KCNH5        | 5.59E+50  | 1.40E-06    |
| cg18026588 | GABRB3       | 9.44E-42  | 4.51E-07    |
| cg00498024 | B3GNT8       | 2.09E+302 | 3.55E-07    |
| cg14290616 | FAM83F       | Infinite  | 2.31E-07    |
| cg11936688 | LOC401242    | 2.13E-35  | 0.000103731 |
| cg07268058 | ISL2         | 3.34E-72  | 4.72E-07    |
| cg26115633 | FOXI2        | 3.92E+209 | 2.91E-07    |
| cg20611911 | TP73         | 5.14E+21  | 2.22E-06    |
| cg00854817 | RPH3A        | 1.19E+225 | 2.47E-07    |
| cg07104209 | EVX1         | 3.82E-80  | 4.35E-07    |
| cg16001495 | SIM2         | 1.29E+40  | 7.67E-06    |
| cg16210842 | IGIP         | Infinite  | 3.90E-07    |
| cg20311863 | BARHL2       | 9.52E+139 | 2.31E-07    |
| cg01381846 | HOXA10-HOXA9 | 1.03E-18  | 0.000258049 |
| cg03574723 | GPR26        | Infinite  | 4.76E-07    |
| cg10824063 | NELL1        | 1.60E-36  | 7.38E-08    |
| cg10143811 | LMO3         | 2.21E+153 | 1.75E-07    |
| cg15889913 | EBF3         | 1.69E+94  | 5.35E-07    |
| cg03111498 | VSX1         | 1.01E-114 | 8.43E-07    |
| cg21012296 | NKX2-2       | 4.40E+69  | 7.13E-08    |
| cg03609960 | ANKS1B       | 6.68E+41  | 1.22E-09    |
| cg17713613 | ZNF738       | 1.27E+26  | 5.07E-06    |
| cg19326876 | ATP10A       | 2.30E+23  | 6.41E-06    |
| cg26249873 | GPR158       | 5.29E+92  | 1.67E-07    |
| cg04415176 | HOXD13       | 1.49E-21  | 5.18E-06    |
| cg18961681 | LOC100130673 | 1.45E-146 | 1.52E-07    |
| cg15754548 | SLC25A35     | 5.72E+188 | 2.57E-07    |

|            |           |           |             |
|------------|-----------|-----------|-------------|
| cg06629130 | SKOR2     | 1.03E+61  | 1.36E-06    |
| cg06197966 | SVIL      | 2.08E+224 | 1.06E-06    |
| cg10811045 | LOC654342 | 2.50E-11  | 0.001135047 |
| cg04475027 | TMEM132C  | 1.07E-48  | 5.38E-07    |
| cg14473102 | HOXD8     | 1.24E-43  | 0.000277086 |
| cg25191628 | DMRTA2    | 1.75E-147 | 2.00E-07    |
| cg02300154 | WBSCR17   | 5.44E+122 | 2.75E-07    |
| cg14712186 | BARHL2    | 1.19E+49  | 8.00E-09    |
| cg23217126 | DOK6      | 2.82E+176 | 7.97E-07    |
| cg06304097 | TCERG1L   | Infinite  | 1.53E-07    |
| cg00596508 | CNTN1     | 7.14E-112 | 7.00E-08    |
| cg24454144 | SLC32A1   | 8.32E+55  | 1.25E-07    |
| cg26013553 | KCNA3     | 1.42E-81  | 6.26E-08    |
| cg04904331 | VWC2      | 2.81E-40  | 9.70E-06    |
| cg01532168 | KCNK9     | 1.72E-136 | 6.33E-07    |
| cg14353137 | TCF24     | 5.32E+60  | 1.72E-07    |
