# Supplementary figures and images for: CpG Island Methylator Phenotype Modulates the Immune Response of the Tumor Microenvironment and Influences the Prognosis of Pancreatic Cancer Patients
Source: Hindawi journal article supplement (doi:10.1155/2021/2715694), 2021-11-28

Supplementary Figure 1

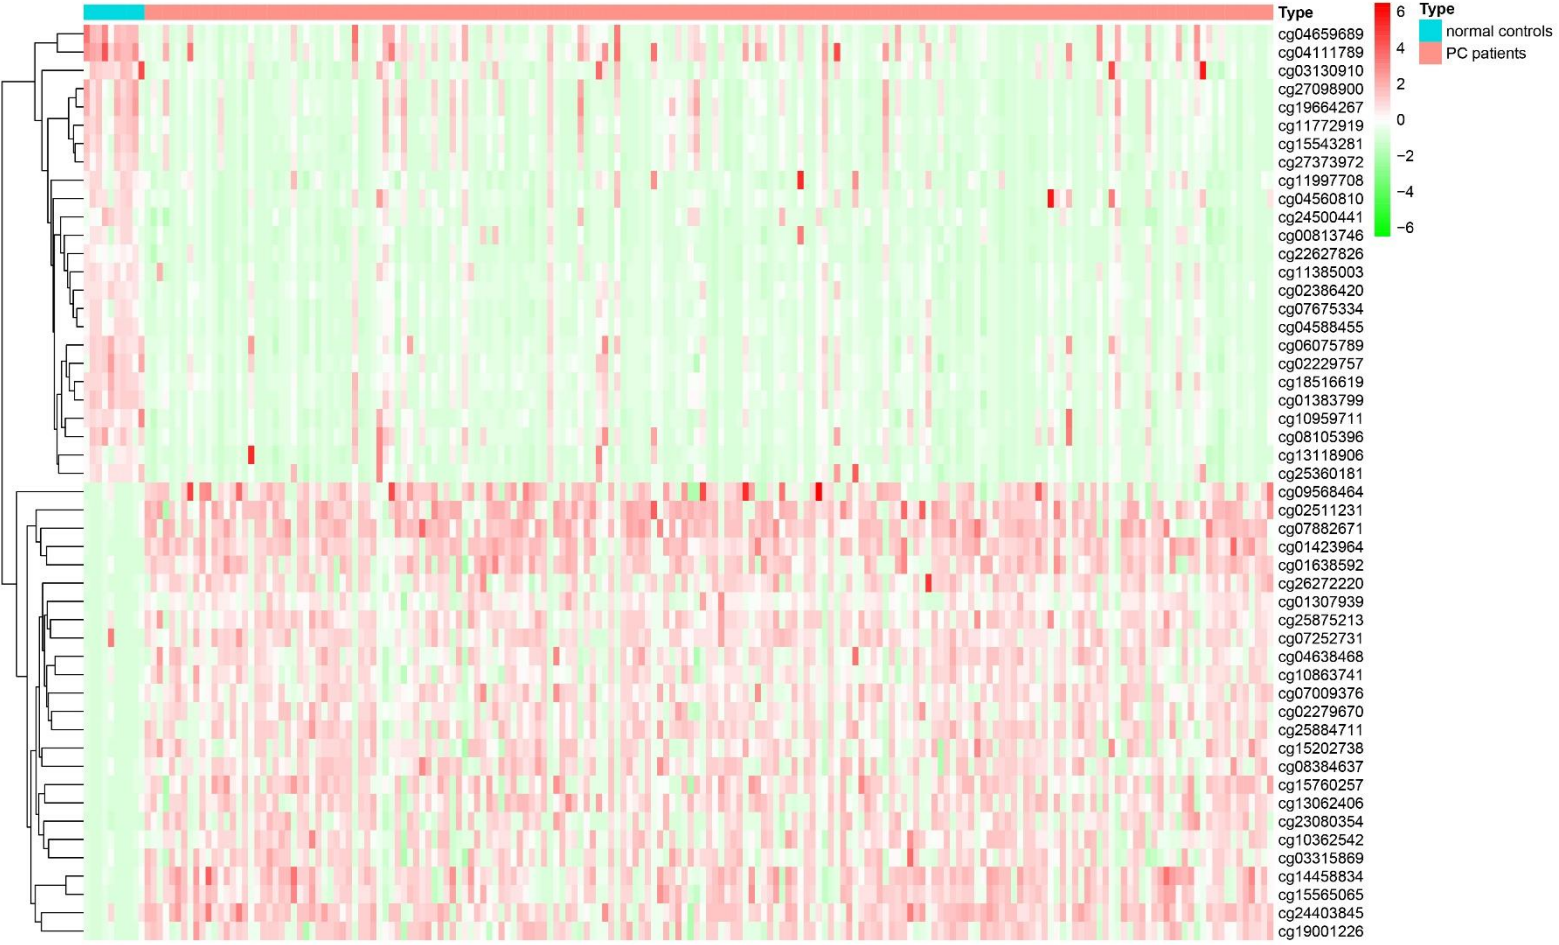

Supplement: f1 [file 2715694.f1.zip]

Supplementary Figure 2

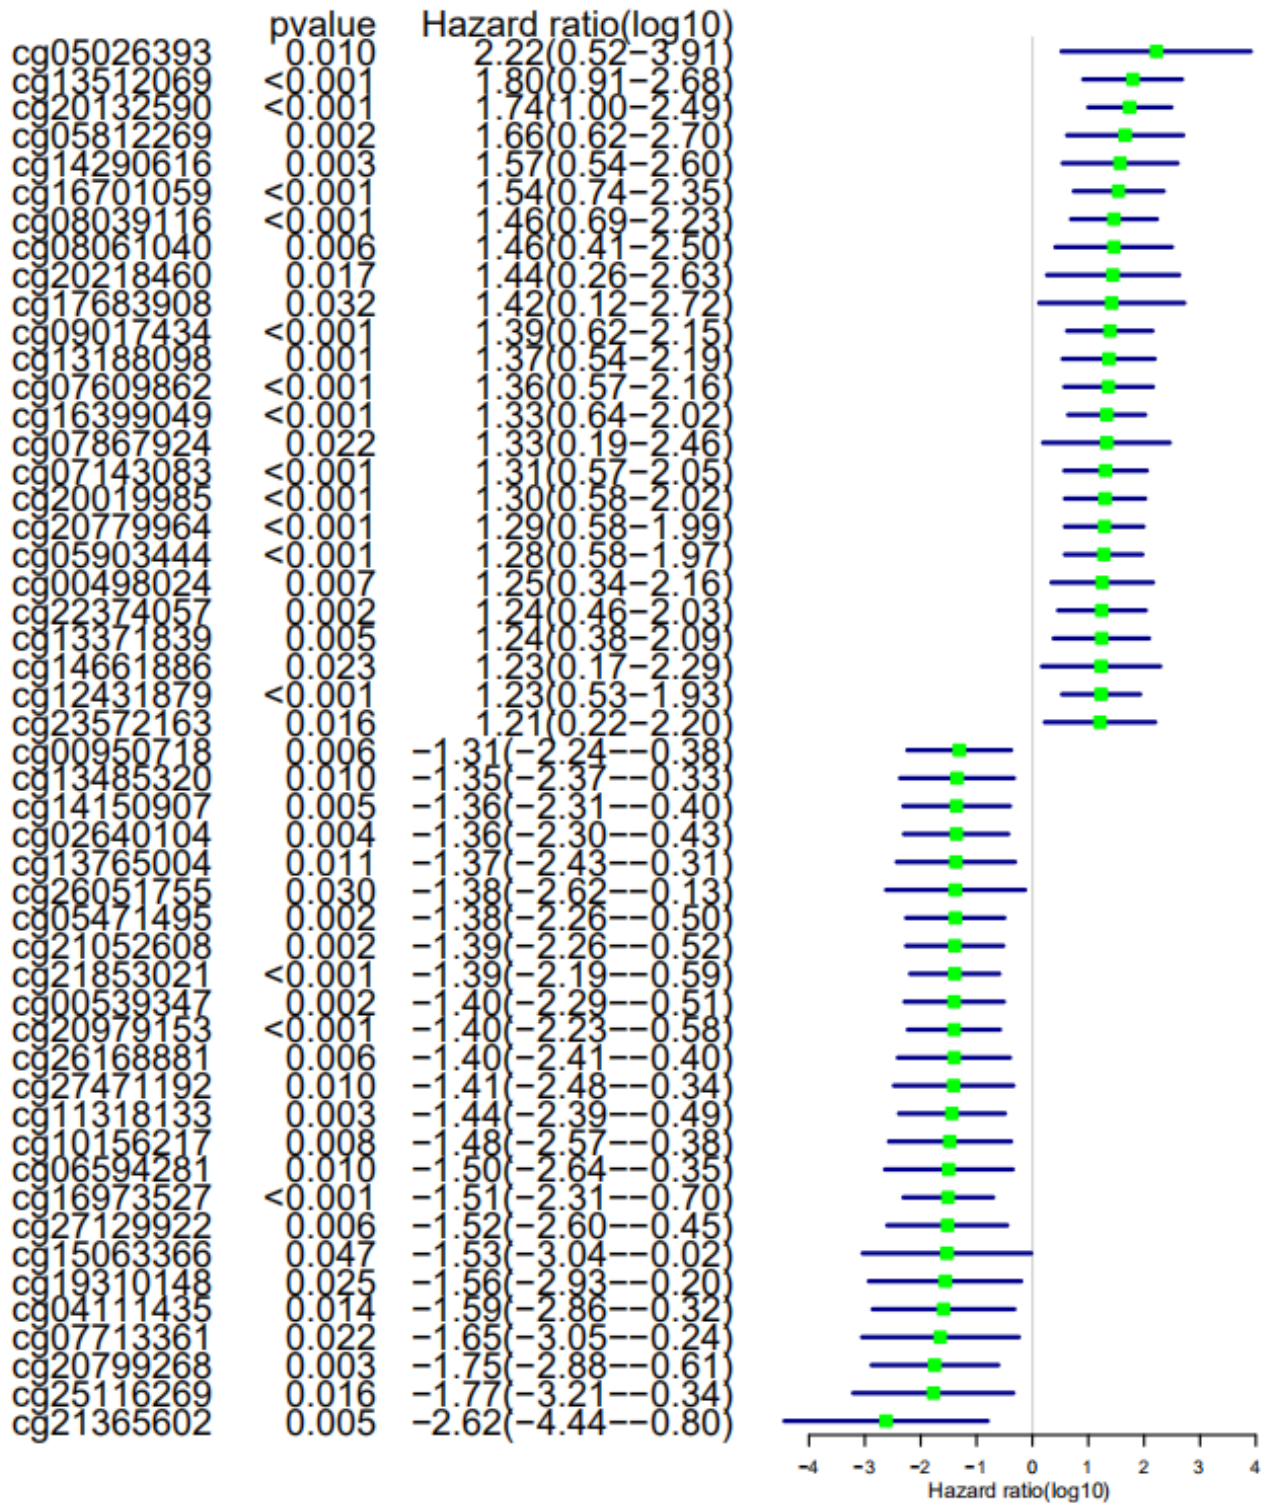

Supplement: f1 [file 2715694.f1.zip]
